# Supplementary material for: Genetic Diversity Among Mycobacterium avium Subspecies Revealed by Analysis of Complete Genome Sequences
Source: Front Microbiol. 2020 Aug 7;11:1701. doi: 10.3389/fmicb.2020.01701 (PMC7426613; doi:10.3389/fmicb.2020.01701)
Supplement: TABLE S1 — Correlation of old and new locus tags for Map K-10. Shown is a complete list of the RefSeq locus tags for Map K-10 along with the corresponding old locus tags which have been used in the scientific literature. In addition, the protein ID and description are given for coding sequences. The “NA” designation in the old locus tag column indicates a gene that was not included in the original annotation. If “NA” is present in both the old locus tag and Protein ID columns, that gene is a pseudogene. [file Table_1.XLSX]

## Sheet: Sheet1
Supplemental table S1. Correlation of old and new locus tags for Map K-10
RefSeq tag	Old locus tag	Protein ID	Description
MAP_RS00005	MAP0001	WP_010948690.1	chromosomal replication initiator protein DnaA
MAP_RS00010	MAP0002	WP_003874371.1	DNA polymerase III subunit beta
MAP_RS00015	MAP0003	WP_003876778.1	DNA replication and repair protein RecF
MAP_RS00020	MAP0004	WP_003874373.1	DUF721 domain-containing protein
MAP_RS00025	MAP0005	WP_009974152.1	DNA topoisomerase IV subunit B
MAP_RS00030	MAP0006	WP_010948691.1	DNA gyrase subunit A
MAP_RS00035	MAP0007	WP_003874376.1	hypothetical protein
MAP_RS22345	MAP0008c	WP_010948692.1	TetR/AcrR family transcriptional regulator
MAP_RS00055	MAP0009	WP_003876783.1	cytochrome P450
MAP_RS00060	MAP0010c	WP_003876784.1	cell wall synthesis protein CwsA
MAP_RS00065	MAP0011	WP_003876785.1	peptidylprolyl isomerase
MAP_RS22350	MAP0012c	WP_010948694.1	hypothetical protein
MAP_RS00075	MAP0013c	WP_003872098.1	cell division protein CrgA
MAP_RS00080	MAP0014	WP_003876787.1	DUF881 domain-containing protein
MAP_RS00085	MAP0015	WP_003876788.1	aminodeoxychorismate/anthranilate synthase component II
MAP_RS00090	MAP0016c	WP_003876789.1	serine/threonine protein kinase
MAP_RS00095	NA	NA	inference=COORDINATES: similar to AA sequence:RefSeq:WP_003872102.1
MAP_RS00100	MAP0019c	WP_003876791.1	penicillin-binding protein 2
MAP_RS00105	MAP0020c	WP_010948697.1	FtsW/RodA/SpoVE family cell cycle protein
MAP_RS00110	MAP0021c	WP_003872105.1	serine/threonine protein phosphatase
MAP_RS00115	MAP0022c	WP_003872106.1	membrane protein
MAP_RS00120	MAP0023c	WP_003876793.1	DUF2662 domain-containing protein
MAP_RS00130	MAP0024c	WP_003876794.1	DinB family protein
MAP_RS00135	MAP0025	WP_003872109.1	acyl carrier protein
MAP_RS00140	MAP0026	WP_010948699.1	inference=COORDINATES: similar to AA sequence:RefSeq:WP_003872110.1
MAP_RS00145	MAP0027	WP_003872111.1	DUF4237 domain-containing protein
MAP_RS00150	NA	WP_016705393.1	hypothetical protein
MAP_RS00155	MAP0028c	WP_010948700.1	IS256 family transposase
MAP_RS22355	NA	WP_003875724.1	hypothetical protein
MAP_RS22360	NA	NA	inference=COORDINATES: similar to AA sequence:RefSeq:WP_009952753.1
MAP_RS00160	MAP0029c	WP_010948701.1	HNH endonuclease
MAP_RS00165	MAP0030c	WP_003875502.1	N-acetyltransferase
MAP_RS00170	MAP0031c	WP_003878371.1	pirin family protein
MAP_RS00175	MAP0032c	WP_003875500.1	acyl-CoA dehydrogenase
MAP_RS00180	MAP0033c	WP_003875499.1	transcriptional regulator
MAP_RS00185	MAP0034	WP_010948702.1	IS110 family transposase
MAP_RS00190	MAP0035	WP_010948703.1	XRE family transcriptional regulator
MAP_RS00195	MAP0036	WP_003874765.1	NlpC/P60 family protein
MAP_RS00200	MAP0037	WP_010948704.1	DUF4226 domain-containing protein
MAP_RS00205	MAP0038	WP_003874763.1	DUF4226 domain-containing protein
MAP_RS00210	MAP0039	WP_003874762.1	ESX-1 secretion-associated protein
MAP_RS00215	MAP0040	WP_003874761.1	DUF2694 domain-containing protein
MAP_RS00220	MAP0041	WP_010948705.1	hypothetical protein
MAP_RS00225	MAP0042	WP_009974208.1	DUF2710 domain-containing protein
MAP_RS00230	MAP0043c	WP_003876808.1	TIGR03084 family protein
MAP_RS00235	MAP0044c	WP_003876809.1	MFS transporter
MAP_RS00240	MAP0045	WP_003874756.1	DUF179 domain-containing protein
MAP_RS00245	MAP0046c	WP_003874755.1	hypothetical protein
MAP_RS00250	MAP0047c	WP_003874754.1	hypothetical protein
MAP_RS00255	MAP0048	WP_003876813.1	leucine--tRNA ligase
MAP_RS00260	MAP0049c	WP_003876815.1	short chain dehydrogenase
MAP_RS00265	MAP0050c	WP_019305959.1	MarR family transcriptional regulator
MAP_RS00270	MAP0051c	WP_003876818.1	amino acid ABC transporter ATP-binding protein
MAP_RS00275	MAP0052c	WP_003876819.1	amino acid ABC transporter permease
MAP_RS00280	MAP0053c	WP_003876820.1	GntR family transcriptional regulator
MAP_RS00285	MAP0054c	WP_003874746.1	LLM class F420-dependent oxidoreductase
MAP_RS00290	MAP0055c	WP_003876821.1	alpha/beta hydrolase
MAP_RS00295	MAP0056c	WP_010948711.1	DUF1214 domain-containing protein
MAP_RS00300	MAP0057c	WP_010948712.1	sugar phosphate isomerase/epimerase
MAP_RS00305	MAP0058c	WP_003876824.1	sulfotransferase
MAP_RS00310	MAP0059c	WP_003876826.1	LLM class flavin-dependent oxidoreductase
MAP_RS00315	MAP0060c	WP_003874739.1	inositol-3-phosphate synthase
MAP_RS00320	MAP0061c	WP_003874738.1	PadR family transcriptional regulator
MAP_RS00325	MAP0062c	WP_003874737.1	DUF1707 domain-containing protein
MAP_RS00330	MAP0063	WP_003874736.1	hypothetical protein
MAP_RS00335	MAP0064	WP_010948714.1	penicillin-binding protein
MAP_RS00340	MAP0065	WP_003874734.1	DUF2029 domain-containing protein
MAP_RS00345	MAP0066	WP_010948715.1	DJ-1/PfpI family protein
MAP_RS00350	MAP0067	WP_003874732.1	30S ribosomal protein S6
MAP_RS00355	MAP0068	WP_003874731.1	inference=COORDINATES: similar to AA sequence:RefSeq:YP_891096.1
MAP_RS00360	MAP0069	WP_003874730.1	inference=COORDINATES: similar to AA sequence:RefSeq:WP_003874730.1
MAP_RS00365	MAP0070	WP_010948716.1	50S ribosomal protein L9
MAP_RS00370	MAP0071	WP_010948717.1	inference=COORDINATES: similar to AA sequence:RefSeq:WP_014381578.1
MAP_RS22370	MAP0072c	WP_003874727.1	glycerol acyltransferase
MAP_RS00380	MAP0073c	WP_010948718.1	class I SAM-dependent methyltransferase
MAP_RS00385	MAP0074	WP_003874725.1	TetR family transcriptional regulator
MAP_RS22375	NA	WP_073578956.1	ferric uptake regulation protein
MAP_RS00390	MAP0075	WP_003876830.1	hypothetical protein
MAP_RS00395	MAP0076	WP_003876831.1	MMPL family RND transporter
MAP_RS00400	MAP0077	WP_019306706.1	hypothetical protein
MAP_RS00405	MAP0078	WP_003876832.1	hypothetical protein
MAP_RS00410	MAP0079	WP_003874720.1	NAD(P)-dependent oxidoreductase
MAP_RS00415	MAP0080c	WP_003876833.1	DUF5134 domain-containing protein
MAP_RS00420	MAP0081	WP_003876834.1	FAD-binding oxidoreductase
MAP_RS00425	MAP0082	WP_003874716.1	Crp/Fnr family transcriptional regulator
MAP_RS00430	MAP0083c	WP_003874715.1	hypothetical protein
MAP_RS00435	MAP0084c	WP_033706106.1	alpha/beta hydrolase
MAP_RS00440	MAP0085c	WP_003876836.1	LysR family transcriptional regulator
MAP_RS00445	MAP0086	WP_019306707.1	EamA/RhaT family transporter
MAP_RS00450	MAP0087	WP_003874711.1	DUF3298 domain-containing protein
MAP_RS00455	MAP0088	WP_003874710.1	DUF4440 domain-containing protein
MAP_RS00460	MAP0089	WP_003874709.1	N-acetyltransferase
MAP_RS00465	MAP0090c	WP_019306708.1	hypothetical protein
MAP_RS00470	MAP0091c	WP_003874707.1	hypothetical protein
MAP_RS00475	MAP0092	WP_003876840.1	ABC transporter permease
MAP_RS00480	MAP0093	WP_003876841.1	ABC transporter permease
MAP_RS00485	NA	WP_019306709.1	hypothetical protein
MAP_RS00490	MAP0095c	WP_003874703.1	NADH-quinone oxidoreductase subunit I 1
MAP_RS22380	NA	NA	inference=COORDINATES: similar to AA sequence:RefSeq:WP_020101213.1
MAP_RS00500	MAP0098c	WP_003876843.1	TetR family transcriptional regulator
MAP_RS22385	MAP0099	WP_003874700.1	CsbD family protein
MAP_RS00505	NA	WP_003874699.1	hypothetical protein
MAP_RS00510	NA	NA	inference=COORDINATES: similar to AA sequence:RefSeq:WP_007172390.1
MAP_RS00515	MAP0102	WP_010948734.1	hypothetical protein
MAP_RS00520	NA	WP_003874696.1	hypothetical protein
MAP_RS22390	MAP0103c	WP_010948735.1	hypothetical protein
MAP_RS00525	NA	WP_003876847.1	hypothetical protein
MAP_RS00530	MAP0104	WP_010948736.1	IS256 family transposase
MAP_RS22395	NA	WP_080505395.1	hypothetical protein
MAP_RS00535	MAP0105c	WP_019306079.1	hypothetical protein
MAP_RS00540	NA	WP_003876878.1	XRE family transcriptional regulator
MAP_RS00545	MAP0106c	WP_003876023.1	integrase
MAP_RS00550	MAP0107	WP_003876024.1	ABC transporter permease
MAP_RS00555	MAP0108	WP_015632714.1	MCE family protein
MAP_RS00560	MAP0109	WP_003876026.1	MCE family protein
MAP_RS00565	MAP0110	WP_003876027.1	MCE family protein
MAP_RS00570	MAP0111	WP_003876028.1	MCE family protein
MAP_RS00575	MAP0112	WP_003876029.1	MCE family protein
MAP_RS00580	MAP0113	WP_010948739.1	MCE family protein
MAP_RS00585	MAP0114	WP_003876031.1	hypothetical protein
MAP_RS00590	MAP0115	WP_003876032.1	DUF3298 domain-containing protein
MAP_RS00595	MAP0116	WP_033706237.1	TetR family transcriptional regulator
MAP_RS00600	MAP0117	WP_003876034.1	hypothetical protein
MAP_RS00605	MAP0118	WP_003876035.1	hypothetical protein
MAP_RS00610	MAP0119c	WP_003876887.1	hypothetical protein
MAP_RS00615	MAP0120c	WP_003876889.1	hypothetical protein
MAP_RS00620	MAP0121	WP_003876039.1	hypothetical protein
MAP_RS00625	MAP0122	WP_003876040.1	PE family protein
MAP_RS00630	NA	NA	inference=COORDINATES: similar to AA sequence:RefSeq:WP_014710782.1
MAP_RS00635	MAP0125c	WP_016706179.1	class I SAM-dependent methyltransferase
MAP_RS00640	MAP0126	WP_003876043.1	nitroreductase family deazaflavin-dependent oxidoreductase
MAP_RS00645	MAP0127	WP_042632782.1	SulP family inorganic anion transporter
MAP_RS00650	MAP0128c	WP_003876337.1	TIGR03619 family F420-dependent LLM class oxidoreductase
MAP_RS00655	MAP0129	WP_019306447.1	2-hydroxyacid dehydrogenase
MAP_RS00660	MAP0130	WP_003876895.1	ATP-binding protein
MAP_RS00665	MAP0131c	WP_003876340.1	wax ester/triacylglycerol synthase family O-acyltransferase
MAP_RS00670	MAP0132c	WP_003876341.1	inference=COORDINATES: similar to AA sequence:RefSeq:WP_003876341.1
MAP_RS00675	MAP0133c	WP_003876342.1	MFS transporter
MAP_RS00680	MAP0134c	WP_003876343.1	hemerythrin domain-containing protein
MAP_RS00685	MAP0135	WP_003876344.1	class I SAM-dependent methyltransferase
MAP_RS00690	MAP0136	WP_003876345.1	VOC family protein
MAP_RS00695	MAP0137c	WP_003876897.1	hypothetical protein
MAP_RS00700	MAP0138c	WP_003876898.1	hypothetical protein
MAP_RS00705	MAP0139c	WP_011723359.1	PadR family transcriptional regulator
MAP_RS00710	MAP0140	WP_003876900.1	nuclear transport factor 2 family protein
MAP_RS00715	MAP0141	WP_003876901.1	LLM class F420-dependent oxidoreductase
MAP_RS00720	MAP0142c	NA	inference=COORDINATES: similar to AA sequence:RefSeq:WP_009956857.1
MAP_RS00725	MAP0143	WP_003876352.1	hypothetical protein
MAP_RS00730	MAP0144	WP_010948753.1	ABC transporter ATP-binding protein
MAP_RS00735	MAP0145	WP_010948754.1	aliphatic sulfonate ABC transporter substrate-binding protein
MAP_RS00740	MAP0146	WP_085978627.1	ABC transporter permease
MAP_RS00745	MAP0147c	WP_003876356.1	FAD-binding oxidoreductase
MAP_RS00755	MAP0149c	NA	inference=COORDINATES: similar to AA sequence:RefSeq:WP_008262880.1
MAP_RS00760	MAP0150c	WP_003876359.1	acyl-CoA dehydrogenase
MAP_RS00765	MAP0151c	NA	inference=COORDINATES: similar to AA sequence:RefSeq:WP_009974345.1
MAP_RS00770	MAP0153	WP_010948759.1	sensor histidine kinase
MAP_RS00775	MAP0154	WP_003876362.1	enoyl-CoA hydratase/isomerase family protein
MAP_RS00780	MAP0155	WP_003876363.1	TetR family transcriptional regulator
MAP_RS00785	MAP0156	WP_003876364.1	extradiol dioxygenase
MAP_RS00790	MAP0157	WP_003876365.1	PE family protein
MAP_RS00795	MAP0158	WP_003876908.1	PPE family protein
MAP_RS00800	MAP0159c	WP_010948702.1	IS110 family transposase
MAP_RS00805	MAP0160	WP_011723369.1	EsxD
MAP_RS00810	MAP0161	WP_003876587.1	secretion protein
MAP_RS00815	MAP0162	WP_003876588.1	ESX secretion-associated protein EspG
MAP_RS00820	MAP0163	WP_003876911.1	MinD/ParA family protein
MAP_RS00825	MAP0164	WP_003876912.1	inference=COORDINATES: similar to AA sequence:RefSeq:NP_218404.1
MAP_RS00830	MAP0165	WP_010948761.1	inference=COORDINATES: similar to AA sequence:RefSeq:WP_014378831.1
MAP_RS00835	MAP0166	NA	gene=eccE
MAP_RS00840	MAP0167	WP_042632956.1	inference=COORDINATES: similar to AA sequence:RefSeq:WP_003876593.1
MAP_RS00845	MAP0168c	WP_003876594.1	nitroreductase family deazaflavin-dependent oxidoreductase
MAP_RS00850	MAP0169c	WP_003876595.1	nucleotide-diphosphate-sugar epimerase
MAP_RS00855	MAP0170	WP_003876596.1	RNA polymerase sigma factor SigI
MAP_RS00860	MAP0171c	WP_042632778.1	MinD/ParA family protein
MAP_RS00865	MAP0172	WP_010948765.1	glutamate synthase large subunit
MAP_RS00870	MAP0173	WP_003872116.1	gene=gltD
MAP_RS23125	MAP0174	WP_010948766.1	hypothetical protein
MAP_RS00875	MAP0175c	WP_003872117.1	TIGR03560 family F420-dependent LLM class oxidoreductase
MAP_RS00880	MAP0176	WP_003872118.1	hypothetical protein
MAP_RS00885	MAP0177	WP_010948767.1	PHP domain-containing protein
MAP_RS00890	MAP0178c	WP_003876920.1	inference=COORDINATES: similar to AA sequence:RefSeq:WP_014383626.1
MAP_RS00895	MAP0179c	WP_003876921.1	TetR/AcrR family transcriptional regulator
MAP_RS00900	MAP0180	WP_003876922.1	NAD(P)/FAD-dependent oxidoreductase
MAP_RS00905	MAP0181c	WP_003872287.1	ribonuclease
MAP_RS00910	MAP0182c	WP_003872288.1	hypothetical protein
MAP_RS00915	NA	WP_015632711.1	copper resistance protein CopC
MAP_RS00920	MAP0183c	WP_003872290.1	DUF1775 domain-containing protein
MAP_RS00925	MAP0184c	WP_003872291.1	hypothetical protein
MAP_RS00930	MAP0185c	WP_003872292.1	transcriptional regulator
MAP_RS00935	MAP0186c	WP_003872293.1	hypothetical protein
MAP_RS00940	MAP0187c	WP_010948769.1	superoxide dismutase [Mn]
MAP_RS00945	MAP0189	WP_019683737.1	DUF4328 domain-containing protein
MAP_RS00950	MAP0190	WP_003872297.1	glycerophosphodiester phosphodiesterase
MAP_RS00955	MAP0191c	WP_003872298.1	LytR family transcriptional regulator
MAP_RS00960	MAP0192c	WP_003876925.1	DUF2470 domain-containing protein
MAP_RS00965	MAP0193	WP_003872300.1	prephenate dehydratase
MAP_RS00970	MAP0194	WP_003872301.1	histidine phosphatase family protein
MAP_RS00975	NA	WP_003872302.1	hypothetical protein
MAP_RS00980	MAP0195c	WP_010948773.1	hypothetical protein
MAP_RS00985	MAP0196c	WP_040963250.1	membrane protein
MAP_RS00990	MAP0197	WP_003872306.1	serine--tRNA ligase
MAP_RS00995	MAP0198c	WP_003872307.1	AraC family transcriptional regulator
MAP_RS01000	MAP0199	WP_003876936.1	SAM-dependent methyltransferase
MAP_RS01005	MAP0200c	WP_003872309.1	DUF2834 domain-containing protein
MAP_RS01010	MAP0201	WP_003872310.1	TetR family transcriptional regulator
MAP_RS01015	MAP0202	WP_003876937.1	NAD(P)/FAD-dependent oxidoreductase
MAP_RS01020	MAP0203c	WP_003872312.1	hypothetical protein
MAP_RS01025	MAP0204c	WP_003872313.1	MBL fold metallo-hydrolase
MAP_RS01030	MAP0205	WP_010948775.1	1-acyl-sn-glycerol-3-phosphate acyltransferase
MAP_RS01035	MAP0206	WP_010948776.1	1-acyl-sn-glycerol-3-phosphate acyltransferase
MAP_RS01040	MAP0207	WP_003876941.1	1-acyl-sn-glycerol-3-phosphate acyltransferase
MAP_RS01045	MAP0208	WP_003876942.1	Cof-type HAD-IIB family hydrolase
MAP_RS01050	MAP0209c	WP_003876943.1	cold-shock protein
MAP_RS23130	NA	NA	gbkey=CDS
MAP_RS22410	NA	WP_080505397.1	hypothetical protein
MAP_RS01060	MAP0211	WP_003876945.1	inference=COORDINATES: similar to AA sequence:RefSeq:WP_003876945.1
MAP_RS01065	MAP0212	WP_010948779.1	glycosyltransferase family 2 protein
MAP_RS01070	MAP0213	WP_003876947.1	PAP2 family protein
MAP_RS01075	MAP0214	WP_003872571.1	decaprenyl-phosphate phosphoribosyltransferase
MAP_RS01080	MAP0215	WP_042632775.1	hypothetical protein
MAP_RS01085	MAP0216	WP_003872573.1	esterase family protein
MAP_RS01090	MAP0217	WP_010948781.1	esterase family protein
MAP_RS01095	MAP0218	WP_003872575.1	cutinase family protein
MAP_RS01100	MAP0219	WP_003872576.1	inference=COORDINATES: similar to AA sequence:RefSeq:WP_008263031.1
MAP_RS01105	MAP0220	WP_003872577.1	polyketide synthase
MAP_RS01110	MAP0221	WP_031350994.1	acyl-CoA carboxylase subunit beta
MAP_RS01115	MAP0222c	WP_003876952.1	SAM-dependent methyltransferase
MAP_RS01120	MAP0223c	WP_010948783.1	AraC family transcriptional regulator
MAP_RS01125	MAP0224c	WP_003876954.1	acyl-CoA dehydrogenase
MAP_RS01130	MAP0225c	WP_010948784.1	Lrp/AsnC family transcriptional regulator
MAP_RS01135	MAP0226	WP_003876956.1	LLM class flavin-dependent oxidoreductase
MAP_RS01140	MAP0227c	WP_003876957.1	hypothetical protein
MAP_RS01145	MAP0228c	WP_010948786.1	arabinosyltransferase
MAP_RS01150	MAP0229c	WP_003876960.1	arabinosyltransferase
MAP_RS01155	MAP0230	WP_015632708.1	transcriptional regulator
MAP_RS01160	MAP0231c	WP_003872588.1	maleylpyruvate isomerase family mycothiol-dependent enzyme
MAP_RS01165	NA	WP_003872589.1	hypothetical protein
MAP_RS01170	MAP0232c	WP_003876961.1	arabinosyltransferase
MAP_RS01175	MAP0233c	WP_003872591.1	arabinofuranosyltransferase
MAP_RS01180	MAP0234c	WP_003876962.1	decaprenylphospho-beta-D-erythro-pentofuranosid-2-ulose 2-reductase
MAP_RS01185	MAP0235c	WP_003876963.1	FAD-binding oxidoreductase
MAP_RS01190	MAP0236c	WP_003876964.1	GtrA family protein
MAP_RS01195	MAP0237c	WP_003872595.1	inference=COORDINATES: similar to AA sequence:RefSeq:WP_008263067.1
MAP_RS01200	MAP0238c	WP_010948789.1	TauD/TfdA family dioxygenase
MAP_RS01205	MAP0239c	WP_003872597.1	ABC transporter permease
MAP_RS01210	MAP0240c	WP_003872598.1	glycosyltransferase family 2 protein
MAP_RS01215	MAP0241c	WP_010948790.1	ABC transporter ATP-binding protein
MAP_RS01220	MAP0242c	WP_003872600.1	DUF2587 domain-containing protein
MAP_RS01225	MAP0243c	WP_003876967.1	hypothetical protein
MAP_RS01230	MAP0244	WP_003872602.1	cysteine desulfurase-like protein
MAP_RS01235	MAP0245c	WP_003872603.1	NAD(P)H quinone oxidoreductase
MAP_RS01245	MAP0246c	WP_003876968.1	hypothetical protein
MAP_RS01250	MAP0247c	WP_003872605.1	hypothetical protein
MAP_RS01255	MAP0248c	WP_003872606.1	hydrolase
MAP_RS01260	MAP0249c	WP_003872607.1	inference=COORDINATES: similar to AA sequence:RefSeq:NP_218291.1
MAP_RS01265	MAP0250	WP_019305855.1	TIGR03086 family protein
MAP_RS01270	MAP0251c	WP_003872609.1	DUF4334 domain-containing protein
MAP_RS01275	MAP0252c	WP_010948792.1	inference=COORDINATES: similar to AA sequence:RefSeq:WP_003876971.1
MAP_RS01290	MAP0253	WP_010948793.1	IS481 family transposase
MAP_RS22415	NA	NA	inference=COORDINATES: similar to AA sequence:RefSeq:WP_009974505.1
MAP_RS01300	MAP0255c	WP_003873399.1	phosphotransferase family protein
MAP_RS01305	MAP0256	WP_003873400.1	SAM-dependent methyltransferase
MAP_RS01310	MAP0257	WP_003876975.1	hypothetical protein
MAP_RS23135	MAP0258	WP_003873402.1	hypothetical protein
MAP_RS01315	MAP0259	WP_003876976.1	DNA-binding response regulator
MAP_RS01320	MAP0260	WP_085978458.1	sensor histidine kinase
MAP_RS01325	MAP0261c	WP_003873405.1	hypothetical protein
MAP_RS01330	MAP0262	WP_010948796.1	alkyl sulfatase
MAP_RS01335	MAP0263c	WP_003876981.1	NADPH:quinone oxidoreductase family protein
MAP_RS01340	MAP0264c	WP_010948797.1	TetR/AcrR family transcriptional regulator
MAP_RS01345	MAP0265c	WP_003876983.1	acyl-CoA dehydrogenase
MAP_RS01350	MAP0266c	WP_003876984.1	KR domain-containing protein
MAP_RS01355	MAP0267c	WP_003873412.1	phosphotransferase family protein
MAP_RS01360	MAP0268c	WP_003873413.1	class I SAM-dependent methyltransferase
MAP_RS01365	MAP0269	WP_003876985.1	histidine phosphatase family protein
MAP_RS01370	MAP0270	WP_003876986.1	phosphotransferase family protein
MAP_RS01375	NA	NA	inference=COORDINATES: similar to AA sequence:RefSeq:WP_003873747.1
MAP_RS01380	MAP0271	WP_003873748.1	ABC transporter
MAP_RS01385	MAP0273	NA	inference=COORDINATES: similar to AA sequence:RefSeq:WP_014383658.1
MAP_RS01390	MAP0274	WP_003874133.1	ABC transporter permease
MAP_RS01395	MAP0275	WP_003874135.1	ABC transporter permease
MAP_RS01400	MAP0276	WP_003876987.1	hypothetical protein
MAP_RS01405	MAP0277c	WP_003874137.1	prephenate dehydrogenase
MAP_RS01410	MAP0278	WP_003874138.1	tRNA adenosine deaminase
MAP_RS01415	MAP0279	WP_003874139.1	nucleoside deaminase
MAP_RS01425	MAP0280	WP_010948802.1	endo-1%2C4-beta-glucanase
MAP_RS01430	MAP0281	WP_033714179.1	CAP domain-containing protein
MAP_RS22420	NA	WP_016705815.1	hypothetical protein
MAP_RS22425	NA	WP_023877748.1	hypothetical protein
MAP_RS01435	MAP0284c	WP_010948804.1	DUF4185 domain-containing protein
MAP_RS01440	MAP0285c	WP_003874145.1	hypothetical protein
MAP_RS01445	NA	WP_003876991.1	hypothetical protein
MAP_RS01450	MAP0286	WP_003874146.1	DUF2237 domain-containing protein
MAP_RS01455	MAP0287	NA	inference=COORDINATES: similar to AA sequence:RefSeq:WP_014381648.1
MAP_RS01460	MAP0289	WP_019306725.1	MBL fold metallo-hydrolase
MAP_RS01465	MAP0290	WP_003874149.1	VOC family protein
MAP_RS01470	MAP0291	WP_019695320.1	hypothetical protein
MAP_RS01475	MAP0292	WP_010948809.1	CoA transferase
MAP_RS01480	MAP0293	WP_003874154.1	CoA ester lyase
MAP_RS01485	MAP0294c	WP_010948810.1	pyruvate carboxylase
MAP_RS01490	MAP0295c	WP_003874156.1	2-methylcitrate synthase
MAP_RS01495	MAP0296c	WP_003876996.1	inference=COORDINATES: similar to AA sequence:RefSeq:WP_003874157.1
MAP_RS01500	MAP0297c	WP_085978606.1	2-methylcitrate dehydratase
MAP_RS01505	MAP0298	WP_003876997.1	XRE family transcriptional regulator
MAP_RS01510	MAP0299c	WP_003876998.1	ribokinase
MAP_RS22430	NA	NA	gbkey=CDS
MAP_RS01515	MAP0300	WP_003876999.1	hypothetical protein
MAP_RS01520	MAP0301	WP_019305910.1	class I SAM-dependent methyltransferase
MAP_RS01525	MAP0302c	WP_003877001.1	inference=COORDINATES: similar to AA sequence:RefSeq:WP_003873349.1
MAP_RS01530	MAP0303c	WP_003873350.1	inference=COORDINATES: similar to AA sequence:RefSeq:WP_009974631.1
MAP_RS01535	MAP0304c	WP_003873351.1	inference=COORDINATES: similar to AA sequence:RefSeq:WP_003873351.1
MAP_RS01540	MAP0305c	WP_003873352.1	ergothioneine biosynthesis protein EgtB
MAP_RS01545	MAP0306c	WP_003873353.1	inference=COORDINATES: similar to AA sequence:RefSeq:WP_003873353.1
MAP_RS01550	MAP0307c	WP_003877002.1	sensor domain-containing protein
MAP_RS01555	NA	WP_003873355.1	hypothetical protein
MAP_RS01560	MAP0308c	WP_003873356.1	hypothetical protein
MAP_RS01565	MAP0309c	WP_003873357.1	DUF4185 domain-containing protein
MAP_RS01570	MAP0310c	WP_003877006.1	aspartate-semialdehyde dehydrogenase
MAP_RS01575	MAP0311c	WP_003877007.1	aspartate kinase
MAP_RS01580	MAP0312	WP_003873360.1	inference=COORDINATES: similar to AA sequence:RefSeq:WP_003873360.1
MAP_RS01585	MAP0313c	WP_003877008.1	inference=COORDINATES: similar to AA sequence:RefSeq:WP_011723524.1
MAP_RS22435	NA	NA	inference=COORDINATES: similar to AA sequence:RefSeq:WP_003907109.1
MAP_RS23140	NA	NA	inference=COORDINATES: similar to AA sequence:RefSeq:WP_003905141.1
MAP_RS01590	MAP0314	WP_003873363.1	DUF1727 domain-containing protein
MAP_RS01595	MAP0315	WP_003873364.1	glutamine amidotransferase
MAP_RS01600	MAP0316c	WP_003873365.1	recombination protein RecR
MAP_RS01605	MAP0317c	WP_010948819.1	YbaB/EbfC family nucleoid-associated protein
MAP_RS01610	MAP0318	WP_003873367.1	N-acetylmuramoyl-L-alanine amidase
MAP_RS01615	MAP0319c	WP_003873368.1	SRPBCC family protein
MAP_RS01620	MAP0320	WP_010948821.1	FAD-binding oxidoreductase
MAP_RS01625	MAP0321	WP_003877009.1	SAM-dependent methyltransferase
MAP_RS01630	MAP0322c	WP_003877010.1	inference=COORDINATES: similar to AA sequence:RefSeq:WP_008263232.1
MAP_RS01635	MAP0323c	WP_024636886.1	aminotransferase
MAP_RS01645	MAP0324	WP_003877011.1	hypothetical protein
MAP_RS01650	MAP0325c	WP_003873375.1	hypothetical protein
MAP_RS01655	MAP0326	WP_003873376.1	hypothetical protein
MAP_RS01660	MAP0327	WP_003873377.1	hypothetical protein
MAP_RS01665	MAP0328	WP_010948822.1	CHAT domain-containing protein
MAP_RS01670	MAP0329c	WP_010948823.1	hypothetical protein
MAP_RS01675	MAP0330	WP_003877013.1	hypothetical protein
MAP_RS01680	MAP0331	WP_003873381.1	hypothetical protein
MAP_RS01685	MAP0332	WP_003873382.1	dihydrodipicolinate reductase
MAP_RS01690	MAP0333	WP_085978457.1	cutinase family protein
MAP_RS01695	MAP0334	WP_003873385.1	KR domain-containing protein
MAP_RS01700	MAP0335	WP_003873386.1	TetR/AcrR family transcriptional regulator
MAP_RS01705	MAP0336c	WP_010948826.1	cytochrome P450
MAP_RS01710	MAP0337	WP_019305668.1	hypothetical protein
MAP_RS22445	MAP0338c	NA	inference=COORDINATES: similar to AA sequence:RefSeq:WP_011896245.1
MAP_RS01720	MAP0339c	WP_003877020.1	DUF2961 domain-containing protein
MAP_RS01725	MAP0340c	WP_003877021.1	ATP-dependent DNA ligase
MAP_RS01730	MAP0341	WP_010948830.1	gene=ligC
MAP_RS01735	MAP0342c	WP_003874420.1	hypothetical protein
MAP_RS01740	MAP0343	WP_003874419.1	hypothetical protein
MAP_RS01745	MAP0344c	WP_003877023.1	cytochrome P450
MAP_RS01750	MAP0345c	WP_003874416.1	haloalkane dehalogenase
MAP_RS01755	MAP0346c	WP_003874414.1	NUDIX domain-containing protein
MAP_RS01760	MAP0347c	WP_003877024.1	wax ester/triacylglycerol synthase family O-acyltransferase
MAP_RS01765	MAP0348c	WP_003877025.1	SDR family oxidoreductase
MAP_RS01770	MAP0349	WP_003874411.1	dihydrodipicolinate reductase
MAP_RS01775	NA	WP_003874410.1	hypothetical protein
MAP_RS01780	MAP0350	WP_003874409.1	NAD(P)-dependent oxidoreductase
MAP_RS01785	MAP0351	WP_003874408.1	transcriptional regulator
MAP_RS01790	MAP0352c	WP_003877026.1	hypothetical protein
MAP_RS22450	NA	NA	inference=COORDINATES: similar to AA sequence:RefSeq:WP_011562252.1
MAP_RS01795	MAP0353	WP_003877027.1	inference=COORDINATES: similar to AA sequence:RefSeq:WP_014378923.1
MAP_RS01800	MAP0354c	WP_003873345.1	PadR family transcriptional regulator
MAP_RS01805	MAP0355	WP_003873344.1	hypothetical protein
MAP_RS01810	MAP0356c	WP_003873343.1	RDD family protein
MAP_RS01815	MAP0357	WP_003877028.1	membrane protein
MAP_RS01820	MAP0358c	WP_003877029.1	DUF58 domain-containing protein
MAP_RS01825	MAP0359c	WP_003873340.1	MoxR family ATPase
MAP_RS01830	MAP0360c	WP_010948835.1	DUF4350 domain-containing protein
MAP_RS01835	MAP0361c	WP_003873338.1	DUF4129 domain-containing protein
MAP_RS01840	MAP0362c	WP_010948836.1	membrane protein
MAP_RS01845	MAP0363	WP_003873336.1	GatB/YqeY domain-containing protein
MAP_RS01850	MAP0364c	WP_010948837.1	translation elongation factor
MAP_RS01855	MAP0365c	WP_015632704.1	L-seryl-tRNA(Sec) selenium transferase
MAP_RS01865	MAP0366	WP_003873333.1	inference=COORDINATES: similar to AA sequence:RefSeq:YP_886219.1
MAP_RS01870	MAP0367	WP_003873332.1	dehydrogenase
MAP_RS01875	MAP0368	WP_073578950.1	formate dehydrogenase
MAP_RS01880	MAP0369	WP_003873330.1	4Fe-4S dicluster domain-containing protein
MAP_RS01885	MAP0370	WP_019694765.1	nitrite reductase
MAP_RS01890	MAP0371	WP_003877040.1	TIGR03557 family F420-dependent LLM class oxidoreductase
MAP_RS01895	MAP0372	WP_003873327.1	type 1 glutamine amidotransferase
MAP_RS01900	MAP0373	WP_003873326.1	methyltransferase domain-containing protein
MAP_RS22455	NA	WP_003873325.1	CDGSH iron-sulfur domain-containing protein
MAP_RS22460	MAP0374c	NA	inference=COORDINATES: similar to AA sequence:RefSeq:WP_011723554.1
MAP_RS01910	MAP0375c	WP_003873323.1	PAS domain S-box protein
MAP_RS01915	MAP0376c	NA	inference=COORDINATES: similar to AA sequence:RefSeq:WP_014383697.1
MAP_RS01920	MAP0377c	WP_003877046.1	serine/threonine protein kinase
MAP_RS01925	MAP0378c	WP_003873320.1	STAS domain-containing protein
MAP_RS01930	MAP0379c	WP_003873319.1	STAS domain-containing protein
MAP_RS01935	MAP0380	WP_019306042.1	anti-sigma factor antagonist
MAP_RS01940	MAP0381	WP_003873317.1	hypothetical protein
MAP_RS01945	MAP0382c	WP_003873316.1	HAD family hydrolase
MAP_RS01950	MAP0383	WP_003873315.1	hypothetical protein
MAP_RS01955	MAP0384	WP_003873314.1	DUF4193 domain-containing protein
MAP_RS01960	MAP0385	WP_003873313.1	restriction endonuclease
MAP_RS01965	MAP0386c	WP_009974685.1	ANTAR domain-containing protein
MAP_RS01970	MAP0387	WP_003873311.1	hypothetical protein
MAP_RS01975	MAP0388	WP_003873310.1	hypothetical protein
MAP_RS01980	MAP0389	WP_003873309.1	hypothetical protein
MAP_RS01990	MAP0390c	WP_085978851.1	lyase
MAP_RS01995	MAP0391c	WP_010948846.1	metallophosphoesterase
MAP_RS02000	MAP0392c	WP_010948847.1	PASTA domain-containing protein
MAP_RS02005	MAP0393	WP_009974690.1	WhiB family transcriptional regulator
MAP_RS02010	MAP0394c	WP_003873304.1	anion transporter
MAP_RS02015	MAP0395c	WP_003873303.1	ATPase
MAP_RS23145	NA	WP_003873302.1	DUF4177 domain-containing protein
MAP_RS02020	MAP0396	WP_003873301.1	RidA family protein
MAP_RS02025	MAP0397	WP_003877055.1	MBL fold metallo-hydrolase
MAP_RS02030	MAP0398c	WP_003877056.1	cAMP receptor protein
MAP_RS02035	MAP0399c	WP_003877057.1	hypothetical protein
MAP_RS02040	MAP0400	WP_016705631.1	inference=COORDINATES: similar to AA sequence:RefSeq:WP_016705631.1
MAP_RS02045	MAP0401	WP_010948849.1	TlpA family protein disulfide reductase
MAP_RS02050	MAP0402	WP_003873295.1	CoA pyrophosphatase
MAP_RS02055	MAP0403	WP_003877060.1	serine protease
MAP_RS02060	MAP0404c	WP_003877061.1	alpha/beta hydrolase
MAP_RS02065	MAP0405c	WP_003873292.1	phage holin family protein
MAP_RS02070	MAP0406	WP_085978456.1	peptidase
MAP_RS02075	MAP0407c	WP_003877063.1	inference=COORDINATES: similar to AA sequence:RefSeq:WP_003877063.1
MAP_RS02080	MAP0408	WP_003877064.1	DUF4232 domain-containing protein
MAP_RS02085	MAP0409	WP_003873288.1	ABC transporter substrate-binding protein
MAP_RS02090	MAP0410	WP_003873287.1	ABC transporter permease
MAP_RS02095	MAP0411	WP_003873286.1	ABC transporter permease
MAP_RS02100	MAP0412	WP_003873285.1	ABC transporter ATP-binding protein
MAP_RS02105	MAP0413	WP_003877070.1	hypothetical protein
MAP_RS22465	NA	NA	gbkey=CDS
MAP_RS02110	MAP0414c	WP_003877071.1	HAD-IB family hydrolase
MAP_RS02115	MAP0415	WP_003877072.1	hypothetical protein
MAP_RS02120	MAP0416	WP_003873281.1	conjugal transfer protein
MAP_RS02125	MAP0417	WP_003873280.1	membrane protein
MAP_RS02130	MAP0418	WP_015632702.1	conserved alanine rich membrane protein
MAP_RS02135	MAP0419	WP_003873278.1	DUF4244 domain-containing protein
MAP_RS02140	MAP0420	WP_033710113.1	hypothetical protein
MAP_RS02145	NA	WP_080871028.1	helicase
MAP_RS02150	MAP0421c	WP_010948853.1	hypothetical protein
MAP_RS02155	MAP0422c	WP_003873274.1	DUF1998 domain-containing protein
MAP_RS02160	MAP0423	WP_003419650.1	cold-shock protein
MAP_RS02165	MAP0424	WP_003877078.1	hypothetical protein
MAP_RS02170	MAP0425	WP_003877079.1	inference=COORDINATES: similar to AA sequence:RefSeq:WP_003877079.1
MAP_RS02175	MAP0426c	WP_010948854.1	adenylate/guanylate cyclase domain-containing protein
MAP_RS02180	MAP0427	WP_003877081.1	inference=COORDINATES: similar to AA sequence:RefSeq:WP_003873269.1
MAP_RS02190	MAP0428	WP_010948855.1	IS481 family transposase ISMav5
MAP_RS02195	MAP0429c	WP_003877084.1	hypothetical protein
MAP_RS02200	MAP0430	WP_016705619.1	UDP-glucose 4-epimerase
MAP_RS02205	MAP0431c	WP_003873266.1	DUF2304 domain-containing protein
MAP_RS02210	MAP0432c	WP_003873265.1	glycosyltransferase family 2 protein
MAP_RS02215	MAP0433c	WP_003873264.1	hypothetical protein
MAP_RS02220	MAP0434	WP_019306255.1	DUF475 domain-containing protein
MAP_RS02225	MAP0435c	WP_010948858.1	inorganic pyrophosphatase
MAP_RS02230	MAP0436	WP_010948859.1	D-alanyl-D-alanine carboxypeptidase/D-alanyl-D-alanine-endopeptidase
MAP_RS02235	MAP0437	WP_003873260.1	hydrolase
MAP_RS02240	MAP0438	WP_003877090.1	inference=COORDINATES: similar to AA sequence:RefSeq:WP_003877090.1
MAP_RS02245	MAP0439	WP_003873258.1	inference=COORDINATES: similar to AA sequence:RefSeq:WP_003873258.1
MAP_RS02250	MAP0440c	WP_003877092.1	DUF541 domain-containing protein
MAP_RS02255	MAP0441	WP_003873256.1	PE family protein
MAP_RS02265	MAP0442	NA	inference=COORDINATES: similar to AA sequence:RefSeq:WP_011723626.1
MAP_RS02270	MAP0443c	WP_010948861.1	HNH endonuclease
MAP_RS02275	MAP0444c	WP_003873252.1	alcohol dehydrogenase
MAP_RS02280	MAP0445c	WP_003877096.1	LLM class flavin-dependent oxidoreductase
MAP_RS02285	MAP0446c	WP_003877097.1	alpha/beta hydrolase
MAP_RS02290	MAP0447	WP_003875603.1	dioxygenase
MAP_RS02295	NA	WP_016706089.1	hypothetical protein
MAP_RS02300	MAP0448	WP_003877098.1	ATP-dependent zinc metalloprotease FtsH
MAP_RS02305	MAP0449	WP_003877099.1	inference=COORDINATES: similar to AA sequence:RefSeq:WP_011723631.1
MAP_RS02310	MAP0450	WP_003875606.1	inference=COORDINATES: similar to AA sequence:RefSeq:WP_003875606.1
MAP_RS02315	MAP0451	WP_003875607.1	inference=COORDINATES: similar to AA sequence:RefSeq:NP_857276.1
MAP_RS02320	MAP0452	WP_010948864.1	inference=COORDINATES: similar to AA sequence:RefSeq:WP_003875608.1
MAP_RS02325	MAP0453	WP_003875609.1	DUF3180 domain-containing protein
MAP_RS02330	MAP0454	WP_010948865.1	hypothetical protein
MAP_RS02335	MAP0455	WP_003875611.1	DUF2520 domain-containing protein
MAP_RS02340	MAP0456	WP_003875612.1	pantoate--beta-alanine ligase
MAP_RS02345	MAP0457	WP_003875613.1	aspartate 1-decarboxylase
MAP_RS02350	MAP0458	WP_003875614.1	type III pantothenate kinase
MAP_RS02355	MAP0459	WP_003877103.1	inference=COORDINATES: similar to AA sequence:RefSeq:NP_218115.1
MAP_RS02360	MAP0460	WP_003875617.1	Lsr2 family protein
MAP_RS02365	MAP0461	WP_010948866.1	ATP-dependent Clp protease ATP-binding subunit
MAP_RS02370	MAP0462	WP_003875620.1	CbtB-domain containing protein
MAP_RS02375	MAP0463	WP_003875621.1	cobalt transporter
MAP_RS02380	MAP0464	WP_003875622.1	histidine phosphatase family protein
MAP_RS02385	MAP0465	WP_003875623.1	lignostilbene-alpha%2Cbeta-dioxygenase-like enzyme
MAP_RS02390	MAP0466c	WP_003875624.1	serine hydrolase
MAP_RS02395	MAP0467c	WP_003875625.1	mycobilin-forming heme oxygenase MhuD
MAP_RS02400	MAP0468	WP_003875626.1	alpha/beta hydrolase
MAP_RS02405	MAP0469c	WP_003877106.1	A/G-specific adenine glycosylase
MAP_RS02410	MAP0470	WP_003877107.1	carbonic anhydrase
MAP_RS02415	MAP0471	WP_085978855.1	hypothetical protein
MAP_RS02420	MAP0472c	WP_003875630.1	dna integrity scanning protein disa
MAP_RS02425	MAP0473c	WP_003875631.1	DNA repair protein RadA
MAP_RS02430	MAP0474c	WP_003875632.1	hypothetical protein
MAP_RS02435	MAP0475	WP_003419482.1	RNA polymerase-binding transcription factor CarD
MAP_RS02440	MAP0476	WP_019683876.1	2-C-methyl-D-erythritol 4-phosphate cytidylyltransferase
MAP_RS02445	MAP0477	WP_003875634.1	2-C-methyl-D-erythritol 2%2C4-cyclodiphosphate synthase
MAP_RS02450	MAP0478	WP_010948871.1	cysteine--tRNA ligase
MAP_RS02455	MAP0479	WP_003877110.1	23S rRNA (guanosine(2251)-2'-O)-methyltransferase RlmB
MAP_RS02460	MAP0480	WP_010948872.1	glycerophosphoryl diester phosphodiesterase
MAP_RS02465	MAP0481c	WP_003875638.1	2-polyprenyl-6-methoxyphenol hydroxylase
MAP_RS02470	NA	NA	inference=COORDINATES: similar to AA sequence:RefSeq:WP_011723649.1
MAP_RS02475	MAP0484c	WP_003875641.1	arsenic transporter
MAP_RS02480	MAP0485c	WP_085978630.1	MBL fold metallo-hydrolase
MAP_RS02485	MAP0486c	WP_003875643.1	LamB/YcsF family protein
MAP_RS02490	MAP0487c	WP_003875644.1	metal ABC transporter permease
MAP_RS02495	MAP0488c	WP_003877115.1	metal ABC transporter ATP-binding protein
MAP_RS02500	MAP0489c	WP_003875646.1	ABC transporter substrate-binding protein
MAP_RS02505	MAP0490	WP_003877117.1	LacI family DNA-binding transcriptional regulator
MAP_RS02510	MAP0491c	WP_003875648.1	TetR/AcrR family transcriptional regulator
MAP_RS02515	MAP0492	WP_003875649.1	acyl-CoA dehydrogenase
MAP_RS02520	MAP0493c	WP_010948875.1	TetR family transcriptional regulator
MAP_RS02525	MAP0494	WP_003875651.1	3-beta hydroxysteroid dehydrogenase
MAP_RS02530	MAP0495c	WP_019306122.1	hypothetical protein
MAP_RS02535	MAP0496c	WP_003875653.1	3-ketosteroid-9-alpha-hydroxylase reductase subunit
MAP_RS02540	MAP0497	WP_003875654.1	flavin-dependent monooxygenase
MAP_RS02545	MAP0498	WP_003875655.1	4%2C5-9%2C10-diseco-3-hydroxy-5%2C9%2C17-trioxoandrosta-1(10)%2C2-diene-4-oate hydrolase
MAP_RS02550	MAP0499	WP_003877120.1	iron-dependent extradiol dioxygenase
MAP_RS02555	MAP0500	WP_003875657.1	flavin reductase
MAP_RS02560	MAP0501	WP_010948878.1	arylamine N-acetyltransferase
MAP_RS02565	MAP0502c	WP_003875659.1	pyridoxal phosphate-dependent aminotransferase
MAP_RS02570	MAP0503c	WP_003875660.1	acyl-CoA dehydrogenase
MAP_RS02575	MAP0504c	WP_003875661.1	acyl-CoA dehydrogenase
MAP_RS02580	MAP0505c	WP_003875662.1	acyl-CoA dehydrogenase
MAP_RS02585	MAP0506c	NA	inference=COORDINATES: similar to AA sequence:RefSeq:WP_014379012.1
MAP_RS02590	MAP0507	WP_003875664.1	acyl-CoA dehydrogenase
MAP_RS02595	MAP0508	WP_003875665.1	short chain dehydrogenase
MAP_RS02600	MAP0509	WP_010948879.1	TetR family transcriptional regulator
MAP_RS02605	MAP0510	WP_003875667.1	inference=COORDINATES: similar to AA sequence:RefSeq:NP_218073.1
MAP_RS02610	MAP0511c	WP_003875668.1	hypothetical protein
MAP_RS02615	MAP0512c	WP_010948880.1	hypothetical protein
MAP_RS02620	MAP0513c	WP_010948881.1	2-nitropropane dioxygenase
MAP_RS02625	MAP0514c	WP_003875672.1	CoA-transferase
MAP_RS02630	MAP0515c	WP_003875673.1	CoA transferase subunit A
MAP_RS02635	MAP0516c	WP_003877130.1	inference=COORDINATES: similar to AA sequence:RefSeq:YP_890227.1
MAP_RS02640	MAP0517	WP_003875675.1	short chain dehydrogenase
MAP_RS02645	MAP0518	WP_003877132.1	KR domain-containing protein
MAP_RS02650	MAP0519c	WP_009974788.1	nitroreductase family deazaflavin-dependent oxidoreductase
MAP_RS02655	MAP0520c	WP_009974789.1	hypothetical protein
MAP_RS02660	MAP0521c	WP_010948882.1	acetyl-CoA C-acyltransferase
MAP_RS02665	MAP0522	WP_003875680.1	cytochrome P450
MAP_RS02670	MAP0523	WP_003877134.1	acyl-CoA dehydrogenase
MAP_RS02675	MAP0524	WP_003875682.1	acyl-CoA dehydrogenase
MAP_RS02680	MAP0525	WP_003875683.1	DNA-binding protein
MAP_RS02685	MAP0526	WP_003875684.1	hypothetical protein
MAP_RS02690	MAP0527	WP_003875685.1	acetyl-CoA acetyltransferase
MAP_RS02695	MAP0528	WP_003877136.1	hypothetical protein
MAP_RS02700	MAP0529c	WP_003875687.1	3-alpha%2C7-alpha%2C12-alpha-trihydroxy-5-beta-cholest-24-enoyl-CoA hydratase
MAP_RS02705	MAP0530c	WP_003875688.1	inference=COORDINATES: similar to AA sequence:RefSeq:WP_009974800.1
MAP_RS02710	MAP0531	WP_003877137.1	2-keto-4-pentenoate hydratase
MAP_RS02715	MAP0532	WP_003875690.1	acetaldehyde dehydrogenase
MAP_RS02720	MAP0533	WP_003875691.1	inference=COORDINATES: similar to AA sequence:RefSeq:WP_014379032.1
MAP_RS02725	MAP0534	WP_003877138.1	hypothetical protein
MAP_RS02730	MAP0535	WP_003875692.1	hypothetical protein
MAP_RS02735	MAP0536	WP_003877140.1	KR domain-containing protein
MAP_RS02740	MAP0537	WP_003877141.1	sulfotransferase
MAP_RS02745	MAP0538c	WP_010948883.1	hypothetical protein
MAP_RS02750	NA	WP_003875696.1	3-ketosteroid-9-alpha-hydroxylase subunit A
MAP_RS02755	MAP0540	WP_009974811.1	gamma carbonic anhydrase family protein
MAP_RS02760	MAP0541c	WP_033706425.1	ketosteroid isomerase
MAP_RS02765	MAP0542c	WP_010948885.1	inference=COORDINATES: similar to AA sequence:RefSeq:WP_008263698.1
MAP_RS02770	MAP0543c	WP_003875700.1	acetyl-CoA acetyltransferase
MAP_RS02775	MAP0544c	WP_003877146.1	hypothetical protein
MAP_RS02780	MAP0545	WP_003875702.1	LLM class F420-dependent oxidoreductase
MAP_RS02785	MAP0546c	WP_011723678.1	acetoacetate decarboxylase
MAP_RS02790	MAP0547	WP_003875704.1	cytochrome P450
MAP_RS02795	MAP0548c	WP_003875705.1	DUF559 domain-containing protein
MAP_RS02800	MAP0549c	WP_003875706.1	inference=COORDINATES: similar to AA sequence:RefSeq:WP_003875706.1
MAP_RS02805	MAP0550	WP_003877147.1	inference=COORDINATES: similar to AA sequence:RefSeq:NP_857183.1
MAP_RS02810	MAP0551	WP_003877148.1	fructosamine kinase
MAP_RS02815	MAP0552	WP_003875709.1	amidohydrolase
MAP_RS02820	MAP0553	WP_010948887.1	acetolactate synthase large subunit
MAP_RS22315	NA	WP_019305743.1	hypothetical protein
MAP_RS02825	MAP0554c	WP_003877150.1	hypothetical protein
MAP_RS02830	MAP0555c	WP_010948889.1	hypothetical protein
MAP_RS02835	MAP0556c	WP_010948890.1	inference=COORDINATES: similar to AA sequence:RefSeq:WP_003877151.1
MAP_RS02840	MAP0558c	NA	inference=COORDINATES: similar to AA sequence:RefSeq:NP_218022.1
MAP_RS02845	MAP0559c	WP_003877154.1	acyl-CoA dehydrogenase
MAP_RS02850	MAP0560	WP_003877155.1	ferredoxin
MAP_RS02855	MAP0561	WP_003875717.1	3-oxoacyl-ACP reductase
MAP_RS02860	MAP0562	WP_003875718.1	ABC transporter permease
MAP_RS02865	MAP0563	WP_003877157.1	ABC transporter permease
MAP_RS02870	MAP0564	WP_003875720.1	virulence factor Mce family protein
MAP_RS02875	MAP0565	WP_010948892.1	virulence factor Mce family protein
MAP_RS02880	MAP0566	WP_003875722.1	virulence factor Mce family protein
MAP_RS02885	MAP0567	WP_010948893.1	virulence factor Mce family protein
MAP_RS02890	MAP0568	WP_009974841.1	MCE family protein
MAP_RS02895	MAP0569	NA	inference=COORDINATES: similar to AA sequence:RefSeq:NP_218011.1
MAP_RS02900	MAP0570	WP_003875729.1	hypothetical protein
MAP_RS02905	MAP0571	WP_003875730.1	hypothetical protein
MAP_RS02910	MAP0572c	WP_003877164.1	hypothetical protein
MAP_RS02915	MAP0573c	WP_003877165.1	trehalose-6-phosphate synthase
MAP_RS23150	NA	WP_003875733.1	hypothetical protein
MAP_RS02920	MAP0574	WP_042632866.1	phosphate ABC transporter ATP-binding protein
MAP_RS02925	MAP0575	WP_003875735.1	iron export ABC transporter permease subunit FetB
MAP_RS02930	MAP0576	WP_003875736.1	enoyl-CoA hydratase
MAP_RS02935	MAP0577	WP_003875737.1	KR domain-containing protein
MAP_RS02940	MAP0578	WP_003875738.1	NAD(P)-dependent oxidoreductase
MAP_RS02945	MAP0579c	WP_010948897.1	hypothetical protein
MAP_RS02950	MAP0580c	WP_003875740.1	hypothetical protein
MAP_RS02955	MAP0581c	WP_003877169.1	amidase
MAP_RS02960	MAP0582	WP_003875743.1	alpha/beta hydrolase
MAP_RS02965	MAP0583	WP_003877170.1	hypothetical protein
MAP_RS02970	MAP0584	WP_010948898.1	hypothetical protein
MAP_RS02975	MAP0585	WP_033714209.1	hypothetical protein
MAP_RS02980	MAP0586c	WP_003877173.1	lytic transglycosylase
MAP_RS02985	NA	WP_003877174.1	DUF732 domain-containing protein
MAP_RS02990	MAP0588	WP_016706118.1	hypothetical protein
MAP_RS02995	MAP0589c	WP_010948855.1	IS481 family transposase ISMav5
MAP_RS03005	NA	WP_003875751.1	hypothetical protein
MAP_RS03010	MAP0591	WP_010948903.1	DNA-binding response regulator
MAP_RS03015	MAP0592	WP_003875753.1	sensor histidine kinase
MAP_RS03020	MAP0593c	WP_003875754.1	HIT family protein
MAP_RS03025	MAP0594c	WP_010948904.1	hypothetical protein
MAP_RS03030	MAP0595c	WP_003875756.1	NDMA-dependent alcohol dehydrogenase
MAP_RS03035	MAP0596c	WP_003877180.1	hypothetical protein
MAP_RS03040	MAP0597c	WP_003875758.1	ferredoxin
MAP_RS03045	MAP0598c	WP_003875759.1	cytochrome P450
MAP_RS03050	MAP0599c	WP_003875760.1	NAD(P)-dependent oxidoreductase
MAP_RS03055	MAP0600c	WP_003875761.1	cytochrome P450
MAP_RS03060	MAP0601c	WP_003875762.1	TetR/AcrR family transcriptional regulator
MAP_RS03065	MAP0602	WP_003875763.1	aldehyde dehydrogenase
MAP_RS03070	MAP0603	WP_003875764.1	3-oxoacyl-ACP reductase
MAP_RS03075	MAP0604	WP_003877182.1	NAD(P)-dependent oxidoreductase
MAP_RS03080	MAP0605	WP_009974886.1	carboxymuconolactone decarboxylase family protein
MAP_RS03085	MAP0606	WP_003877184.1	phosphoribosylamine--glycine ligase
MAP_RS03090	MAP0607c	WP_019683771.1	gamma-glutamyltransferase family protein
MAP_RS03095	MAP0608c	WP_003877186.1	hypothetical protein
MAP_RS03100	MAP0609	WP_010948907.1	TetR family transcriptional regulator
MAP_RS03105	MAP0610c	WP_003875772.1	DUF429 domain-containing protein
MAP_RS03110	MAP0611	WP_010948908.1	adenylosuccinate lyase
MAP_RS03115	MAP0612	WP_003875774.1	cytochrome P450
MAP_RS03120	MAP0613c	WP_003877188.1	hypothetical protein
MAP_RS03125	MAP0614	WP_003875776.1	phosphoribosylaminoimidazolesuccinocarboxamide synthase
MAP_RS03130	MAP0615	WP_003877189.1	inference=COORDINATES: similar to AA sequence:RefSeq:WP_016706123.1
MAP_RS03135	MAP0616c	WP_003875778.1	membrane protein
MAP_RS03140	MAP0617	WP_003875779.1	TetR family transcriptional regulator
MAP_RS03145	MAP0618c	WP_010948909.1	MFS transporter
MAP_RS03150	MAP0619c	WP_033706144.1	MFS transporter
MAP_RS03155	MAP0620	WP_003875782.1	DUF2334 domain-containing protein
MAP_RS03160	MAP0621	WP_019306124.1	FAD-binding dehydrogenase
MAP_RS03165	NA	WP_003877194.1	MBL fold hydrolase
MAP_RS03170	MAP0624	WP_003877195.1	hypothetical protein
MAP_RS03175	MAP0625	WP_003875786.1	phosphoribosylformylglycinamidine synthase subunit PurS
MAP_RS03180	MAP0626	WP_003875787.1	phosphoribosylformylglycinamidine synthase subunit PurQ
MAP_RS03185	MAP0627c	WP_003875788.1	hypothetical protein
MAP_RS03190	MAP0628c	WP_003877196.1	GntR family transcriptional regulator
MAP_RS03195	MAP0629c	WP_003875790.1	cupin domain-containing protein
MAP_RS03200	MAP0630c	WP_003875791.1	bacteriocin
MAP_RS03205	MAP0631c	WP_003875792.1	peroxidase
MAP_RS03210	MAP0632	WP_019695270.1	M18 family aminopeptidase
MAP_RS03215	MAP0633	WP_003875793.1	VOC family protein
MAP_RS03220	MAP0634c	WP_033706142.1	hypothetical protein
MAP_RS03225	MAP0635	WP_010948916.1	phosphoribosylformylglycinamidine synthase subunit PurL
MAP_RS03230	MAP0636	WP_003875796.1	CPBP family intramembrane metalloprotease
MAP_RS03235	MAP0637	WP_003877202.1	hypothetical protein
MAP_RS03240	MAP0638	WP_085978605.1	amidophosphoribosyltransferase
MAP_RS03245	MAP0639	WP_003877203.1	phosphoribosylformylglycinamidine cyclo-ligase
MAP_RS03250	MAP0640c	WP_003875800.1	DUF3073 domain-containing protein
MAP_RS03255	MAP0641c	WP_003875801.1	folate-binding protein
MAP_RS03260	MAP0642	WP_003877204.1	inference=COORDINATES: similar to AA sequence:RefSeq:NP_854493.1
MAP_RS03265	MAP0643c	WP_003875803.1	FABP family protein
MAP_RS23155	NA	WP_003875804.1	hypothetical protein
MAP_RS03275	MAP0644c	WP_003877205.1	DUF1416 domain-containing protein
MAP_RS03280	MAP0645c	WP_003877206.1	sulfurtransferase
MAP_RS03285	MAP0646c	WP_003875807.1	DUF4395 domain-containing protein
MAP_RS03290	MAP0647c	WP_003877207.1	thioredoxin
MAP_RS03295	MAP0648c	WP_003875809.1	DUF2993 domain-containing protein
MAP_RS03300	MAP0649	WP_003875810.1	DNA-binding response regulator
MAP_RS03305	MAP0650	WP_003875811.1	inference=COORDINATES: similar to AA sequence:RefSeq:WP_011723739.1
MAP_RS03310	MAP0651	WP_003875812.1	inference=COORDINATES: similar to AA sequence:RefSeq:WP_016706131.1
MAP_RS03315	MAP0652	WP_003877208.1	inference=COORDINATES: similar to AA sequence:RefSeq:WP_003877208.1
MAP_RS03320	MAP0653	WP_003877209.1	inference=COORDINATES: similar to AA sequence:RefSeq:WP_009954452.1
MAP_RS03325	MAP0654	WP_003877210.1	phosphate ABC transporter ATP-binding protein
MAP_RS03330	MAP0655c	WP_003875816.1	inference=COORDINATES: similar to AA sequence:RefSeq:WP_007166323.1
MAP_RS03335	MAP0656c	WP_003875817.1	LytR family transcriptional regulator
MAP_RS22470	NA	WP_073578938.1	hypothetical protein
MAP_RS03340	MAP0657c	WP_010948921.1	tRNA dihydrouridine synthase DusB
MAP_RS03345	MAP0658c	WP_003875819.1	acyl-ACP desaturase
MAP_RS03350	MAP0659c	WP_003875820.1	TetR/AcrR family transcriptional regulator
MAP_RS03355	MAP0660	WP_003877215.1	DUF2236 domain-containing protein
MAP_RS22475	NA	NA	inference=COORDINATES: similar to AA sequence:RefSeq:WP_015632696.1
MAP_RS03365	MAP0661c	WP_003877217.1	transcriptional regulator
MAP_RS03370	MAP0662c	WP_003875824.1	nucleoside deaminase
MAP_RS03375	MAP0663	WP_010948924.1	SAM-dependent methyltransferase
MAP_RS03380	MAP0664c	WP_010948925.1	IS481 family transposase
MAP_RS03405	MAP0665c	WP_003877219.1	NAD(P)-dependent oxidoreductase
MAP_RS03410	MAP0666c	WP_003877220.1	TetR/AcrR family transcriptional regulator
MAP_RS03415	MAP0667	WP_003873074.1	ferredoxin
MAP_RS03420	MAP0668	WP_003873073.1	cytochrome P450
MAP_RS22480	NA	WP_003873072.1	hypothetical protein
MAP_RS03425	MAP0669	WP_003873070.1	cold-shock protein
MAP_RS03430	MAP0670	WP_003873069.1	hypothetical protein
MAP_RS22485	MAP0671	WP_010948928.1	methyltransferase domain-containing protein
MAP_RS03435	MAP0672c	WP_003873067.1	short chain dehydrogenase
MAP_RS03440	MAP0673	WP_029245574.1	methylmalonyl-CoA mutase
MAP_RS03445	MAP0674	WP_003877225.1	methylmalonyl-CoA mutase
MAP_RS03450	MAP0675	WP_003873064.1	TIGR03564 family F420-dependent LLM class oxidoreductase
MAP_RS03455	MAP0676	WP_003873063.1	CoA transferase
MAP_RS03460	MAP0677c	WP_003877226.1	amidohydrolase
MAP_RS03465	MAP0678c	WP_003877227.1	hypothetical protein
MAP_RS03470	MAP0679c	WP_003877228.1	(2Fe-2S)-binding protein
MAP_RS03475	MAP0680	WP_003873059.1	acyl-CoA synthetase (AMP-forming)/AMP-acid ligase II
MAP_RS03480	MAP0681	WP_003877229.1	acyl-CoA dehydrogenase
MAP_RS03485	MAP0682	WP_003873056.1	acyl-CoA dehydrogenase
MAP_RS03490	MAP0683	WP_003873055.1	enoyl-CoA hydratase/isomerase family protein
MAP_RS03495	MAP0684c	WP_003877230.1	proline iminopeptidase
MAP_RS03500	MAP0685	WP_003873053.1	phenolic acid decarboxylase
MAP_RS03505	MAP0686	WP_003873052.1	acetyl-CoA C-acyltransferase
MAP_RS03510	MAP0687	WP_003873051.1	methylmalonyl Co-A mutase-associated GTPase MeaB
MAP_RS03515	MAP0688	WP_003873050.1	dehydrogenase
MAP_RS03520	MAP0689c	WP_003873049.1	DNA-binding response regulator
MAP_RS03525	MAP0690	WP_016705586.1	ATP-binding protein
MAP_RS03530	MAP0691c	WP_003873047.1	FAD-binding protein
MAP_RS03535	MAP0692c	WP_003877233.1	IclR family transcriptional regulator
MAP_RS03540	MAP0693	WP_003873045.1	alpha/beta hydrolase
MAP_RS03545	MAP0694	WP_003873044.1	3-(3-hydroxy-phenyl)propionate/3-hydroxycinnamic acid hydroxylase
MAP_RS03550	MAP0695	WP_010948934.1	gene=mhpB
MAP_RS03555	MAP0696	WP_010948935.1	inference=COORDINATES: similar to AA sequence:RefSeq:WP_003877236.1
MAP_RS03560	MAP0697	WP_010948936.1	LLM class flavin-dependent oxidoreductase
MAP_RS03565	MAP0698	WP_003873040.1	3-alpha-hydroxysteroid dehydrogenase
MAP_RS03570	MAP0699	WP_010948937.1	cyclase
MAP_RS03575	MAP0700	WP_003877238.1	alpha/beta hydrolase
MAP_RS03580	MAP0701c	WP_019306015.1	multicopper oxidase family protein
MAP_RS03585	MAP0702	WP_003877239.1	NAD(P)-dependent oxidoreductase
MAP_RS03590	MAP0703	WP_003877240.1	TetR/AcrR family transcriptional regulator
MAP_RS03595	NA	WP_003873034.1	ferredoxin
MAP_RS03600	MAP0704	WP_003873033.1	cytochrome P450
MAP_RS03605	MAP0705	WP_010948940.1	amidohydrolase
MAP_RS03610	MAP0706	WP_003873031.1	aminopeptidase P family protein
MAP_RS03615	MAP0707	WP_003877243.1	aminopeptidase P family protein
MAP_RS03620	MAP0708	WP_003873029.1	CoA transferase
MAP_RS03625	MAP0709	WP_003873028.1	oxidoreductase
MAP_RS03630	MAP0710c	WP_024637094.1	KR domain-containing protein
MAP_RS03635	MAP0711c	WP_010948942.1	NAD(P)-dependent oxidoreductase
MAP_RS03640	MAP0712c	WP_003873025.1	TetR/AcrR family transcriptional regulator
MAP_RS03645	MAP0713	WP_015632693.1	acyl-CoA dehydrogenase
MAP_RS03650	MAP0714c	WP_003873023.1	DUF4190 domain-containing protein
MAP_RS03655	MAP0715c	WP_003873022.1	acyl-CoA dehydrogenase
MAP_RS03660	MAP0716c	NA	inference=COORDINATES: similar to AA sequence:RefSeq:WP_014379169.1
MAP_RS03665	MAP0717c	WP_003877248.1	nuclear transport factor 2 family protein
MAP_RS03670	MAP0718c	WP_003877249.1	amidohydrolase family protein
MAP_RS03675	MAP0719c	WP_003873018.1	hypothetical protein
MAP_RS03680	MAP0720c	WP_003877250.1	aromatic ring-hydroxylating dioxygenase subunit alpha
MAP_RS03685	MAP0721c	WP_003873016.1	carboxymuconolactone decarboxylase family protein
MAP_RS03690	MAP0722	WP_010948946.1	amidohydrolase
MAP_RS03695	MAP0723	WP_003873014.1	acyl-CoA dehydrogenase
MAP_RS03700	MAP0724	WP_003873013.1	inference=COORDINATES: similar to AA sequence:RefSeq:WP_007777408.1
MAP_RS03705	MAP0725	WP_003873012.1	TetR/AcrR family transcriptional regulator
MAP_RS03710	MAP0726	WP_003873011.1	hypothetical protein
MAP_RS03715	MAP0727	WP_010948947.1	cytochrome P450
MAP_RS03720	NA	WP_003873009.1	ferredoxin
MAP_RS03725	MAP0728	WP_003873008.1	DUF1330 domain-containing protein
MAP_RS03730	MAP0729c	WP_003873007.1	ferredoxin
MAP_RS03735	MAP0730c	WP_003877255.1	cytochrome P450
MAP_RS03740	MAP0731c	WP_003873005.1	NAD(P)-dependent oxidoreductase
MAP_RS03745	MAP0732c	WP_003877257.1	alpha/beta hydrolase
MAP_RS03750	MAP0733c	WP_003873003.1	hypothetical protein
MAP_RS22490	NA	WP_003873002.1	hypothetical protein
MAP_RS03755	MAP0735	WP_003877258.1	NAD(P)-dependent oxidoreductase
MAP_RS03760	MAP0736	WP_003873000.1	hypothetical protein
MAP_RS03765	MAP0737	WP_010948951.1	TIGR03564 family F420-dependent LLM class oxidoreductase
MAP_RS03770	NA	WP_003877260.1	ferredoxin
MAP_RS03775	MAP0738c	WP_003877262.1	hypothetical protein
MAP_RS03780	MAP0739	WP_003877263.1	hypothetical protein
MAP_RS03785	MAP0740c	WP_010948952.1	alpha/beta hydrolase
MAP_RS03790	MAP0741c	WP_003877265.1	Rieske (2Fe-2S) protein
MAP_RS03795	MAP0742c	WP_003872994.1	amidohydrolase
MAP_RS03800	MAP0743c	WP_019306240.1	amidohydrolase
MAP_RS03805	MAP0744c	WP_003877270.1	NAD(P)-dependent oxidoreductase
MAP_RS03810	MAP0745c	WP_003872991.1	inference=COORDINATES: similar to AA sequence:RefSeq:WP_003872991.1
MAP_RS03815	MAP0746	WP_003877272.1	nitroreductase
MAP_RS03820	MAP0747	WP_003877273.1	hypothetical protein
MAP_RS03825	MAP0748	WP_003877274.1	acyl-CoA dehydrogenase
MAP_RS03830	MAP0749c	WP_003872985.1	membrane protein
MAP_RS03835	MAP0750c	WP_003872984.1	hypothetical protein
MAP_RS03840	MAP0751c	WP_003872983.1	hypothetical protein
MAP_RS03845	NA	WP_016705575.1	hypothetical protein
MAP_RS03850	MAP0752c	NA	inference=COORDINATES: similar to AA sequence:RefSeq:WP_012396255.1
MAP_RS03855	MAP0753c	WP_003872980.1	ferredoxin
MAP_RS03860	MAP0754c	WP_003877305.1	NAD(P)-dependent oxidoreductase
MAP_RS03865	MAP0755	WP_010948959.1	aldehyde dehydrogenase
MAP_RS03870	MAP0756	WP_003877306.1	CoA transferase
MAP_RS03875	MAP0757	WP_003872974.1	ABC transporter permease
MAP_RS03880	MAP0758	WP_003877308.1	ABC transporter permease
MAP_RS03885	MAP0759	WP_003872972.1	MCE family protein
MAP_RS03890	MAP0760	WP_010948961.1	MCE family protein
MAP_RS03895	MAP0761	WP_003872970.1	MCE family protein
MAP_RS03900	NA	NA	inference=COORDINATES: similar to AA sequence:RefSeq:WP_009975069.1
MAP_RS03905	MAP0764	WP_003872968.1	MCE family protein
MAP_RS03910	MAP0765	WP_003872967.1	MCE family protein
MAP_RS03915	MAP0766c	WP_003872966.1	hypothetical protein
MAP_RS03920	MAP0767c	WP_003872965.1	hypothetical protein
MAP_RS03925	MAP0768c	WP_003877310.1	hypothetical protein
MAP_RS03930	MAP0769	WP_023861861.1	hypothetical protein
MAP_RS03935	MAP0770c	WP_003877311.1	TetR/AcrR family transcriptional regulator
MAP_RS03940	MAP0771	WP_003872961.1	hypothetical protein
MAP_RS03945	MAP0772	WP_003872960.1	hypothetical protein
MAP_RS03950	MAP0773	WP_003872959.1	cytochrome c oxidase subunit 3 family protein
MAP_RS03955	NA	WP_003877313.1	hypothetical protein
MAP_RS03960	MAP0774c	WP_003877314.1	cytochrome P450
MAP_RS03965	MAP0775	WP_003872953.1	TetR/AcrR family transcriptional regulator
MAP_RS03970	MAP0776c	WP_019305703.1	hypothetical protein
MAP_RS03975	MAP0777c	WP_003877317.1	enoyl-CoA hydratase/isomerase family protein
MAP_RS03980	MAP0778	WP_003872947.1	hypothetical protein
MAP_RS03985	MAP0779	WP_009975090.1	amidohydrolase
MAP_RS03990	MAP0780	WP_003872944.1	fatty acid--CoA ligase family protein
MAP_RS03995	MAP0781	WP_003877321.1	hypothetical protein
MAP_RS04000	MAP0782	WP_003872942.1	(2Fe-2S)-binding protein
MAP_RS04005	MAP0783c	WP_003877322.1	inference=COORDINATES: similar to AA sequence:RefSeq:WP_003877322.1
MAP_RS04010	MAP0784	WP_003872940.1	cyclase
MAP_RS04015	MAP0785	WP_003872939.1	CoA transferase
MAP_RS04020	MAP0786	WP_010948974.1	cyclase
MAP_RS04025	MAP0787	WP_003872937.1	cyclase
MAP_RS04030	MAP0788c	WP_003872936.1	putative succinyldiaminopimelate transaminase DapC
MAP_RS04035	MAP0789	WP_003877323.1	acetyl-CoA acetyltransferase
MAP_RS04040	MAP0790	WP_010948975.1	3-hydroxyacyl-CoA dehydrogenase
MAP_RS04045	MAP0791c	WP_003877324.1	class I SAM-dependent methyltransferase
MAP_RS04050	MAP0792c	WP_003872931.1	TIGR03620 family F420-dependent LLM class oxidoreductase
MAP_RS04055	MAP0793c	WP_003872930.1	FAD-dependent oxidoreductase
MAP_RS04060	MAP0794	WP_010948976.1	TetR/AcrR family transcriptional regulator
MAP_RS04065	MAP0795	WP_033706150.1	TIGR03560 family F420-dependent LLM class oxidoreductase
MAP_RS04070	MAP0796c	WP_003872927.1	antibiotic biosynthesis monooxygenase
MAP_RS04075	MAP0797	WP_003872926.1	DNA-binding protein
MAP_RS04080	MAP0798	WP_003877328.1	thiolase family protein
MAP_RS04085	MAP0799c	WP_003872924.1	helicase
MAP_RS04090	MAP0800c	WP_003877330.1	DNA-binding protein
MAP_RS04095	MAP0801	WP_003872922.1	hypothetical protein
MAP_RS04100	MAP0802	WP_003872921.1	inference=COORDINATES: similar to AA sequence:RefSeq:WP_003872921.1
MAP_RS04105	MAP0803	WP_003872920.1	molybdenum cofactor biosynthesis protein
MAP_RS04110	MAP0804	WP_003872919.1	molybdenum cofactor biosynthesis protein MoaE
MAP_RS04115	MAP0805c	WP_010948980.1	hypothetical protein
MAP_RS04120	MAP0806c	WP_010948981.1	MoaD/ThiS family protein
MAP_RS04125	NA	NA	inference=COORDINATES: similar to AA sequence:RefSeq:WP_014379231.1
MAP_RS04130	MAP0809c	WP_003877336.1	YccF domain-containing protein
MAP_RS04135	MAP0810	WP_003872914.1	cold-shock protein
MAP_RS04140	MAP0811	WP_003877338.1	acyl-CoA dehydrogenase
MAP_RS04145	MAP0812	WP_003877339.1	glutathione S-transferase
MAP_RS04150	MAP0813c	NA	inference=COORDINATES: similar to AA sequence:RefSeq:WP_014381844.1
MAP_RS04155	MAP0814c	WP_003872910.1	DUF2771 domain-containing protein
MAP_RS04160	MAP0815c	WP_003877341.1	MFS transporter
MAP_RS04165	MAP0816	WP_003877342.1	DUF3027 domain-containing protein
MAP_RS04170	MAP0817c	WP_003877343.1	SRPBCC family protein
MAP_RS04175	MAP0818c	WP_003877344.1	DUF2530 domain-containing protein
MAP_RS04180	MAP0819	WP_003872905.1	MarR family transcriptional regulator
MAP_RS04185	MAP0820	WP_003872904.1	RNA methyltransferase
MAP_RS04190	MAP0821	WP_085978622.1	DUF2537 domain-containing protein
MAP_RS04195	MAP0822c	WP_003877346.1	DUF3071 domain-containing protein
MAP_RS04200	MAP0823c	WP_003877347.1	phosphoserine transaminase
MAP_RS04205	MAP0824	WP_003872900.1	diiron oxygenase
MAP_RS04210	MAP0825	WP_003872899.1	4Fe-4S dicluster domain-containing protein
MAP_RS04215	MAP0826c	WP_003872898.1	VOC family protein
MAP_RS04220	MAP0827c	WP_003872897.1	inference=COORDINATES: similar to AA sequence:RefSeq:NP_215404.1
MAP_RS04225	MAP0828	WP_003872896.1	inference=COORDINATES: similar to AA sequence:RefSeq:NP_302406.2
MAP_RS04230	MAP0829	WP_003872895.1	citrate synthase
MAP_RS04235	MAP0830c	WP_003872894.1	NAD(P)/FAD-dependent oxidoreductase
MAP_RS04240	MAP0831c	WP_003872893.1	DUF2630 domain-containing protein
MAP_RS04245	MAP0832c	WP_003876199.1	IS110 family transposase ISMpa1
MAP_RS04250	MAP0833c	NA	inference=COORDINATES: similar to AA sequence:RefSeq:NP_215417.1
MAP_RS04255	MAP0834c	WP_003872891.1	DNA-binding response regulator
MAP_RS04260	MAP0835c	WP_003877354.1	MFS transporter
MAP_RS04265	MAP0836	WP_010948988.1	glycosyltransferase family 4 protein
MAP_RS04270	MAP0837	WP_003872888.1	glycogen debranching protein
MAP_RS04275	MAP0838c	WP_010948989.1	hypothetical protein
MAP_RS04280	MAP0839c	WP_003877357.1	acetyl-CoA carboxylase carboxyltransferase subunit beta
MAP_RS04285	MAP0840	WP_003872885.1	inference=COORDINATES: similar to AA sequence:RefSeq:NP_215420.1
MAP_RS04290	MAP0841	WP_029245181.1	hypothetical protein
MAP_RS04295	MAP0842	WP_003872883.1	serine hydrolase
MAP_RS04300	MAP0843	WP_003872882.1	magnesium-transporting ATPase
MAP_RS04305	MAP0844	WP_003872881.1	antitoxin
MAP_RS04310	MAP0845	WP_003872880.1	SRPBCC family protein
MAP_RS04315	MAP0846	WP_003877359.1	hypothetical protein
MAP_RS04320	MAP0847	WP_033706762.1	DUF4185 domain-containing protein
MAP_RS04325	MAP0848	WP_003872877.1	hypothetical protein
MAP_RS22495	NA	WP_016705560.1	hypothetical protein
MAP_RS04330	NA	WP_016705559.1	hypothetical protein
MAP_RS04335	MAP0849c	WP_010948736.1	IS256 family transposase
MAP_RS04340	MAP0850c	WP_010948855.1	IS481 family transposase ISMav5
MAP_RS04345	NA	WP_016705558.1	hypothetical protein
MAP_RS04350	NA	WP_003877462.1	hypothetical protein
MAP_RS22505	MAP0853	WP_010948992.1	hypothetical protein
MAP_RS22510	MAP0854	WP_010948993.1	hypothetical protein
MAP_RS04355	NA	WP_003877465.1	hypothetical protein
MAP_RS22515	MAP0856c	WP_003872872.1	hypothetical protein
MAP_RS04360	NA	WP_003872871.1	hypothetical protein
MAP_RS04365	NA	WP_003872870.1	hypothetical protein
MAP_RS04370	NA	WP_016705556.1	hypothetical protein
MAP_RS04375	MAP0859c	WP_010948997.1	hypothetical protein
MAP_RS22520	MAP0860c	WP_003872868.1	hypothetical protein
MAP_RS22525	MAP0862	WP_003877468.1	hypothetical protein
MAP_RS22530	NA	NA	inference=COORDINATES: similar to AA sequence:RefSeq:WP_003904445.1
MAP_RS04380	MAP0863	WP_010948999.1	hypothetical protein
MAP_RS22535	MAP0865	WP_010949001.1	cell division protein FtsK
MAP_RS22540	NA	WP_064469008.1	DNA-binding protein
MAP_RS22545	NA	WP_015632689.1	phage integrase
MAP_RS04395	MAP0867c	WP_016705553.1	TIGR03621 family F420-dependent LLM class oxidoreductase
MAP_RS04400	MAP0868c	WP_010949003.1	replication protein
MAP_RS04405	MAP0869c	WP_010949004.1	divalent metal cation transporter
MAP_RS04410	MAP0870c	WP_003877475.1	hypothetical protein
MAP_RS04415	MAP0871c	WP_003877476.1	3-oxoacyl-ACP reductase
MAP_RS04420	MAP0872	WP_010949005.1	inference=COORDINATES: similar to AA sequence:RefSeq:WP_007168736.1
MAP_RS04425	MAP0873	WP_003877477.1	inference=COORDINATES: similar to AA sequence:RefSeq:WP_009975178.1
MAP_RS04430	MAP0874	WP_003872855.1	inference=COORDINATES: similar to AA sequence:RefSeq:WP_016705551.1
MAP_RS04435	MAP0875c	WP_003872854.1	Ku protein
MAP_RS04440	MAP0876c	WP_003872853.1	carbohydrate kinase
MAP_RS04445	MAP0877c	WP_003877478.1	mannitol dehydrogenase family protein
MAP_RS04450	MAP0878c	WP_003872851.1	haloacid dehalogenase
MAP_RS04455	MAP0879c	WP_003872850.1	mannitol dehydrogenase family protein
MAP_RS04460	MAP0880	WP_010949008.1	inference=COORDINATES: similar to AA sequence:RefSeq:WP_003872849.1
MAP_RS04465	MAP0881	WP_003877480.1	2-hydroxyhepta-2%2C4-diene-1%2C7-dioate isomerase
MAP_RS04470	MAP0882c	WP_003872846.1	SAM-dependent methyltransferase
MAP_RS04475	MAP0883	WP_015632688.1	enoyl-CoA hydratase/isomerase family protein
MAP_RS04480	MAP0884c	WP_003872844.1	LLM class flavin-dependent oxidoreductase
MAP_RS04485	MAP0885c	WP_003872843.1	anti-sigma factor antagonist
MAP_RS04490	MAP0886c	NA	inference=COORDINATES: similar to AA sequence:RefSeq:WP_014383907.1
MAP_RS04495	MAP0887c	WP_033706155.1	diiron oxygenase
MAP_RS04500	MAP0888	WP_015632687.1	inference=COORDINATES: similar to AA sequence:RefSeq:WP_003877487.1
MAP_RS04505	MAP0889	WP_003872839.1	Fpg/Nei family DNA glycosylase
MAP_RS04510	MAP0890	WP_003872838.1	short chain dehydrogenase
MAP_RS04515	MAP0891c	WP_003872837.1	glucose-6-phosphate isomerase
MAP_RS04520	MAP0892c	WP_010949011.1	chorismate mutase
MAP_RS04525	MAP0893	WP_010949012.1	inference=COORDINATES: similar to AA sequence:RefSeq:NP_854631.1
MAP_RS22550	MAP0894c	WP_015632686.1	hypothetical protein
MAP_RS04535	MAP0895c	WP_003872833.1	M23 family peptidase
MAP_RS04540	MAP0896	WP_003877488.1	ADP-forming succinate--CoA ligase subunit beta
MAP_RS04545	MAP0897	WP_003872831.1	succinate--CoA ligase subunit alpha
MAP_RS04550	MAP0898	WP_003877489.1	acetyl-CoA acetyltransferase
MAP_RS04555	MAP0899c	WP_003872829.1	TIGR03619 family F420-dependent LLM class oxidoreductase
MAP_RS04560	MAP0900	WP_003877490.1	hypothetical protein
MAP_RS04565	MAP0901	WP_003872827.1	hypothetical protein
MAP_RS04570	MAP0902	WP_003872825.1	phosphoribosylglycinamide formyltransferase
MAP_RS04575	MAP0903	WP_040963270.1	bifunctional phosphoribosylaminoimidazolecarboxamide formyltransferase/inosine monophosphate cyclohydrolase
MAP_RS22555	MAP0904	WP_003872823.1	hypothetical protein
MAP_RS04585	MAP0905	WP_003872822.1	magnesium chelatase
MAP_RS04590	MAP0906	WP_003877493.1	VWA domain-containing protein
MAP_RS04595	MAP0907	WP_003872820.1	aldo/keto reductase
MAP_RS04600	MAP0908c	WP_003877494.1	DUF1707 domain-containing protein
MAP_RS04605	MAP0909c	WP_003877495.1	inference=COORDINATES: similar to AA sequence:RefSeq:WP_011723933.1
MAP_RS04610	MAP0910c	WP_003872817.1	acyl-CoA dehydrogenase
MAP_RS04615	MAP0911c	WP_010949021.1	acetyl/propionyl-CoA carboxylase subunit alpha
MAP_RS04620	MAP0912c	WP_085978623.1	acyl-CoA carboxylase subunit beta
MAP_RS04625	MAP0913c	WP_003877496.1	acyl-CoA dehydrogenase
MAP_RS04630	MAP0914c	WP_003872813.1	DUF1446 domain-containing protein
MAP_RS04635	MAP0915	WP_003872812.1	inference=COORDINATES: similar to AA sequence:RefSeq:NP_301249.1
MAP_RS04640	MAP0916	WP_003872811.1	DNA-binding response regulator
MAP_RS04645	MAP0917	WP_003877497.1	two-component sensor histidine kinase
MAP_RS22560	NA	NA	inference=COORDINATES: similar to AA sequence:RefSeq:WP_014379290.1
MAP_RS04650	MAP0918	WP_003872809.1	PDZ domain-containing protein
MAP_RS04655	MAP0919	WP_016705537.1	molybdenum cofactor biosynthesis protein
MAP_RS04660	MAP0920c	WP_003872807.1	large-conductance mechanosensitive channel protein MscL
MAP_RS04665	MAP0921c	WP_003877500.1	hypothetical protein
MAP_RS04670	MAP0922c	WP_003877501.1	FmdB family transcriptional regulator
MAP_RS04675	MAP0923c	WP_003872804.1	5-formyltetrahydrofolate cyclo-ligase
MAP_RS04680	MAP0924	WP_003877502.1	UTP--glucose-1-phosphate uridylyltransferase
MAP_RS04685	MAP0925	WP_003872802.1	molybdopterin molybdenumtransferase MoeA
MAP_RS04690	MAP0926	WP_003872801.1	N-acetyltransferase
MAP_RS04695	MAP0927	WP_019305594.1	hypothetical protein
MAP_RS04705	NA	WP_003877504.1	hypothetical protein
MAP_RS04710	MAP0930	WP_003877506.1	TetR/AcrR family transcriptional regulator
MAP_RS04715	MAP0931	WP_003872795.1	DUF4442 domain-containing protein
MAP_RS04720	MAP0932c	WP_003872794.1	TetR/AcrR family transcriptional regulator
MAP_RS04725	MAP0933	WP_003877508.1	hypothetical protein
MAP_RS04730	MAP0934	WP_003872792.1	peptidase M42
MAP_RS04735	MAP0935	WP_003877509.1	GHMP kinase
MAP_RS04740	MAP0936	WP_003877511.1	SIS domain-containing protein
MAP_RS04745	MAP0937	WP_003872789.1	histidinol phosphate phosphatase
MAP_RS04750	MAP0938	WP_085978452.1	GNAT family N-acetyltransferase
MAP_RS04755	MAP0939	WP_003872787.1	hypothetical protein
MAP_RS04760	MAP0940	WP_003872786.1	hypothetical protein
MAP_RS04765	NA	WP_003872785.1	alpha-ketoglutarate-dependent dioxygenase AlkB
MAP_RS04770	MAP0942	WP_003872784.1	inference=COORDINATES: similar to AA sequence:RefSeq:NP_215517.1
MAP_RS04775	MAP0943c	WP_003872783.1	phospholipid carrier-dependent glycosyltransferase
MAP_RS04780	MAP0944	WP_003872782.1	inference=COORDINATES: similar to AA sequence:RefSeq:NP_215519.1
MAP_RS04785	MAP0945c	WP_010949036.1	inference=COORDINATES: similar to AA sequence:RefSeq:WP_010949036.1
MAP_RS04790	MAP0946c	WP_003872780.1	RNA polymerase sigma-70 factor
MAP_RS04795	MAP0947c	WP_015632681.1	dehydrogenase
MAP_RS04800	MAP0948	WP_016705530.1	hypothetical protein
MAP_RS04805	MAP0949	WP_003877517.1	hypothetical protein
MAP_RS04810	MAP0950c	WP_003872775.1	FkbM family methyltransferase
MAP_RS04815	MAP0951	WP_003877518.1	hypothetical protein
MAP_RS04820	MAP0952	WP_003877519.1	chain-length determining protein
MAP_RS04825	MAP0953	WP_003872771.1	O-antigen ligase domain-containing protein
MAP_RS04830	MAP0954	WP_003872770.1	glycosyl transferase family 1
MAP_RS04835	MAP0955	WP_003872769.1	aldo/keto reductase
MAP_RS04840	MAP0956	WP_010949040.1	GMC family oxidoreductase
MAP_RS04845	MAP0957c	WP_010949041.1	hypothetical protein
MAP_RS04850	MAP0958c	WP_019696171.1	gfo/Idh/MocA family oxidoreductase
MAP_RS04855	MAP0959	WP_003872765.1	polysaccharide biosynthesis protein
MAP_RS04860	MAP0960	WP_003872764.1	hypothetical protein
MAP_RS04865	MAP0961c	WP_016705528.1	hypothetical protein
MAP_RS04870	MAP0962c	WP_003877524.1	glycosyl transferase family 1
MAP_RS04875	MAP0963c	WP_003872761.1	teichoic acid transporter
MAP_RS04880	MAP0964c	WP_029245205.1	sugar transferase
MAP_RS04885	MAP0965c	WP_003872759.1	dTDP-4-keto-6-deoxy-D-glucose epimerase
MAP_RS04890	MAP0966c	WP_003872758.1	PPE family protein
MAP_RS04895	MAP0967	WP_010948702.1	IS110 family transposase
MAP_RS04900	MAP0968	WP_003872757.1	TetR/AcrR family transcriptional regulator
MAP_RS04905	MAP0969	WP_003872756.1	TetR/AcrR family transcriptional regulator
MAP_RS04910	MAP0970	WP_003872755.1	hypothetical protein
MAP_RS04915	MAP0971	WP_003877531.1	polysaccharide deacetylase family protein
MAP_RS04920	NA	WP_003872753.1	PAS domain-containing protein
MAP_RS04925	MAP0972c	WP_003872752.1	methionine--tRNA ligase
MAP_RS04930	MAP0973	WP_003872751.1	YchF/TatD family DNA exonuclease
MAP_RS04935	MAP0974	WP_019306009.1	resuscitation-promoting factor
MAP_RS04940	MAP0975	WP_010949048.1	ribosomal RNA small subunit methyltransferase A
MAP_RS04945	MAP0976	WP_003877534.1	4-diphosphocytidyl-2C-methyl-D-erythritol kinase
MAP_RS22565	NA	NA	inference=COORDINATES: similar to AA sequence:RefSeq:WP_014379328.1
MAP_RS04950	MAP0977	WP_010949050.1	inference=COORDINATES: similar to AA sequence:RefSeq:NP_215529.1
MAP_RS04955	MAP0978c	WP_003872744.1	peptidyl-tRNA hydrolase
MAP_RS04960	MAP0979c	WP_003872743.1	50S ribosomal protein L25
MAP_RS04965	MAP0980c	WP_003872742.1	KR domain-containing protein
MAP_RS04970	MAP0981c	WP_003872741.1	hypothetical protein
MAP_RS04975	MAP0982c	WP_003872740.1	inference=COORDINATES: similar to AA sequence:RefSeq:YP_889667.1
MAP_RS04980	MAP0983c	WP_003877535.1	inference=COORDINATES: similar to AA sequence:RefSeq:WP_012396022.1
MAP_RS04985	MAP0984c	WP_003872738.1	inference=COORDINATES: similar to AA sequence:RefSeq:NP_215534.1
MAP_RS04995	MAP0985	WP_003872737.1	TetR/AcrR family transcriptional regulator
MAP_RS05000	MAP0986c	WP_003872736.1	inference=COORDINATES: similar to AA sequence:RefSeq:WP_014379335.1
MAP_RS05005	MAP0987	WP_019683794.1	inference=COORDINATES: similar to AA sequence:RefSeq:WP_019683794.1
MAP_RS05010	MAP0988	WP_003877539.1	nucleoside triphosphate pyrophosphohydrolase
MAP_RS05015	MAP0989	WP_003877541.1	hypothetical protein
MAP_RS05020	MAP0990	WP_003877542.1	inference=COORDINATES: similar to AA sequence:RefSeq:NP_854707.1
MAP_RS05025	MAP0991	WP_003872731.1	septation inhibitor protein
MAP_RS05030	MAP0992	WP_003872730.1	DUF501 domain-containing protein
MAP_RS05035	MAP0993	WP_003872729.1	Ppx/GppA family phosphatase
MAP_RS05040	MAP0994	WP_003872728.1	hypothetical protein
MAP_RS05045	MAP0995c	WP_003877545.1	DNA-binding response regulator
MAP_RS05050	MAP0996c	WP_010949055.1	sensor histidine kinase KdpD
MAP_RS05055	MAP0997c	WP_003872725.1	potassium-transporting ATPase subunit C
MAP_RS05060	MAP0999c	NA	gene=kdpB
MAP_RS05065	MAP1000c	WP_003877548.1	potassium-transporting ATPase A chain
MAP_RS05070	NA	WP_003872722.1	hypothetical protein
MAP_RS05075	NA	WP_003877549.1	hypothetical protein
MAP_RS05080	MAP1001c	WP_003872721.1	sensor histidine kinase
MAP_RS05085	MAP1002c	WP_009975275.1	DNA-binding response regulator
MAP_RS05090	NA	WP_003874405.1	hypothetical protein
MAP_RS05095	NA	WP_003874404.1	WXG100 family type VII secretion target
MAP_RS05100	NA	WP_003877554.1	PPE family protein
MAP_RS22570	NA	NA	inference=COORDINATES: similar to AA sequence:RefSeq:WP_014383968.1
MAP_RS05120	MAP1004	WP_003872718.1	class I SAM-dependent methyltransferase
MAP_RS05125	MAP1005	WP_003872717.1	hypothetical protein
MAP_RS05130	MAP1006	WP_003872715.1	DUF427 domain-containing protein
MAP_RS05135	MAP1007	WP_010949060.1	YncE family protein
MAP_RS05140	MAP1008	WP_019305635.1	fatty acid--CoA ligase
MAP_RS05145	MAP1009	WP_003872712.1	SRPBCC family protein
MAP_RS05150	MAP1010	WP_003872711.1	class II glutamine amidotransferase
MAP_RS05155	MAP1011	WP_003877559.1	hypothetical protein
MAP_RS05160	MAP1012c	WP_003872709.1	esterase
MAP_RS05165	MAP1013c	WP_033714272.1	hypothetical protein
MAP_RS05170	MAP1014	WP_003872707.1	cysteine dioxygenase
MAP_RS05175	MAP1015	WP_003877562.1	hypothetical protein
MAP_RS05180	MAP1016c	WP_003872705.1	membrane protein
MAP_RS05185	MAP1017c	WP_003872704.1	inference=COORDINATES: similar to AA sequence:RefSeq:WP_003886713.1
MAP_RS05190	MAP1018c	WP_003872703.1	enoyl-CoA hydratase/isomerase family protein
MAP_RS05195	MAP1019	WP_003872702.1	membrane protein
MAP_RS05200	MAP1021c	NA	inference=COORDINATES: similar to AA sequence:RefSeq:WP_007776674.1
MAP_RS05205	MAP1022c	WP_085978624.1	SGNH/GDSL hydrolase family protein
MAP_RS05210	MAP1023	WP_003877567.1	alpha/beta hydrolase
MAP_RS05215	MAP1024	WP_003872698.1	cystathionine beta-synthase
MAP_RS05220	MAP1025	WP_003872697.1	RDD family protein
MAP_RS05225	MAP1026	WP_003872696.1	cystathionine gamma-synthase
MAP_RS05230	MAP1027c	WP_003872695.1	transcription elongation factor GreA
MAP_RS05235	MAP1028c	WP_003872694.1	DUF4307 domain-containing protein
MAP_RS05240	MAP1029	WP_003877569.1	inference=COORDINATES: similar to AA sequence:RefSeq:WP_003872693.1
MAP_RS05245	MAP1030	WP_003877570.1	YebC/PmpR family DNA-binding transcriptional regulator
MAP_RS05250	MAP1031c	WP_010949070.1	spermidine synthase
MAP_RS05255	MAP1032c	WP_003872690.1	DUF350 domain-containing protein
MAP_RS05260	MAP1033	WP_010948702.1	IS110 family transposase
MAP_RS05265	NA	WP_003872689.1	DUF4247 domain-containing protein
MAP_RS05270	MAP1034c	WP_003872688.1	DUF2617 domain-containing protein
MAP_RS05275	MAP1035c	WP_003872687.1	DUF4178 domain-containing protein
MAP_RS05280	MAP1036	WP_003877574.1	crossover junction endodeoxyribonuclease RuvC
MAP_RS05285	MAP1037	WP_003872685.1	Holliday junction branch migration protein RuvA
MAP_RS05290	MAP1038	WP_003872684.1	Holliday junction branch migration DNA helicase RuvB
MAP_RS05295	MAP1039	WP_003872683.1	hypothetical protein
MAP_RS05300	MAP1040c	WP_003872682.1	oxidoreductase
MAP_RS05305	MAP1041c	WP_003872681.1	inference=COORDINATES: similar to AA sequence:RefSeq:NP_217105.1
MAP_RS05310	MAP1042	WP_003872680.1	preprotein translocase subunit YajC
MAP_RS05315	MAP1043	WP_010949072.1	inference=COORDINATES: similar to AA sequence:RefSeq:NP_217103.1
MAP_RS05320	MAP1044	WP_003872678.1	inference=COORDINATES: similar to AA sequence:RefSeq:WP_003872678.1
MAP_RS05325	MAP1045	WP_080574062.1	hypothetical protein
MAP_RS05330	MAP1046	WP_003872676.1	adenine phosphoribosyltransferase
MAP_RS05335	MAP1047	WP_003877578.1	RelA/SpoT family protein
MAP_RS05340	MAP1048c	WP_010949073.1	IS481 family transposase
MAP_RS05345	MAP1049c	WP_003872674.1	protein kinase
MAP_RS05350	MAP1050c	WP_003872673.1	peptidylprolyl isomerase
MAP_RS05355	MAP1051	WP_010949075.1	MBL fold metallo-hydrolase
MAP_RS05360	MAP1052	WP_003872671.1	histidine--tRNA ligase
MAP_RS22575	NA	NA	gbkey=CDS
MAP_RS05365	MAP1053	WP_073578927.1	HNH endonuclease
MAP_RS05370	NA	WP_003877583.1	hypothetical protein
MAP_RS05375	MAP1054	WP_003872669.1	radical SAM protein
MAP_RS05380	MAP1055c	WP_003877585.1	hypothetical protein
MAP_RS05385	MAP1056	WP_019306167.1	hypothetical protein
MAP_RS05390	MAP1057c	WP_003872666.1	XRE family transcriptional regulator
MAP_RS05395	MAP1058	WP_003877587.1	aldolase
MAP_RS05400	MAP1059	WP_003877588.1	dihydrodipicolinate synthase family protein
MAP_RS05405	MAP1060c	WP_003872663.1	membrane protein
MAP_RS05410	MAP1061c	WP_003872662.1	SRPBCC family protein
MAP_RS05415	MAP1062c	WP_073578928.1	2-dehydropantoate 2-reductase
MAP_RS05420	MAP1063	WP_003872660.1	aspartate--tRNA ligase
MAP_RS22580	NA	WP_073578929.1	hypothetical protein
MAP_RS05425	NA	NA	inference=COORDINATES: similar to AA sequence:RefSeq:WP_003877590.1
MAP_RS05430	NA	WP_003877592.1	hypothetical protein
MAP_RS05435	NA	WP_003872658.1	hypothetical protein
MAP_RS05440	MAP1065	WP_003877594.1	nitroreductase family deazaflavin-dependent oxidoreductase
MAP_RS05445	MAP1066	WP_003877595.1	aromatic acid exporter family protein
MAP_RS05450	MAP1067c	WP_003877596.1	hypothetical protein
MAP_RS05455	MAP1068	WP_019684778.1	transglutaminase family protein
MAP_RS05460	MAP1069	WP_009977724.1	hypothetical protein
MAP_RS05465	MAP1070c	WP_003872652.1	hypothetical protein
MAP_RS05470	MAP1071c	WP_003877598.1	hypothetical protein
MAP_RS05475	MAP1072	WP_003872650.1	replication-associated recombination protein A
MAP_RS05480	MAP1073	WP_003872649.1	hypothetical protein
MAP_RS05485	NA	NA	inference=COORDINATES: similar to AA sequence:RefSeq:WP_008258260.1
MAP_RS05490	MAP1076	WP_003872647.1	hypothetical protein
MAP_RS05495	MAP1077	WP_003872646.1	alanine--tRNA ligase
MAP_RS05500	MAP1078	WP_003872645.1	Holliday junction resolvase RuvX
MAP_RS05505	MAP1079	WP_003877602.1	aminodeoxychorismate lyase
MAP_RS05510	MAP1080	WP_010949080.1	shikimate dehydrogenase
MAP_RS05515	MAP1081	WP_003877603.1	prepilin peptidase
MAP_RS05520	MAP1082c	WP_003877604.1	LLM class flavin-dependent oxidoreductase
MAP_RS05525	MAP1083c	WP_010949081.1	LLM class flavin-dependent oxidoreductase
MAP_RS05530	MAP1084c	WP_003872639.1	hypothetical protein
MAP_RS05535	MAP1085	WP_003877606.1	acyl-CoA dehydrogenase
MAP_RS05540	MAP1086	WP_003872637.1	peptide ABC transporter substrate-binding protein
MAP_RS05545	NA	NA	inference=COORDINATES: similar to AA sequence:RefSeq:WP_009977703.1
MAP_RS05550	MAP1089	WP_003872635.1	ABC transporter permease
MAP_RS05555	MAP1090	WP_003872634.1	ABC transporter ATP-binding protein
MAP_RS05560	MAP1091	WP_003877608.1	chorismate synthase
MAP_RS05565	MAP1092	WP_003872632.1	shikimate kinase
MAP_RS05570	MAP1093	WP_003877609.1	3-dehydroquinate synthase
MAP_RS05575	MAP1094	WP_003877610.1	inference=COORDINATES: similar to AA sequence:RefSeq:WP_003872630.1
MAP_RS05580	MAP1095c	WP_003872629.1	hypothetical protein
MAP_RS05585	MAP1096	WP_003872628.1	aminopeptidase P family protein
MAP_RS05590	MAP1097	WP_003872627.1	inference=COORDINATES: similar to AA sequence:RefSeq:WP_011559756.1
MAP_RS05595	MAP1098	WP_003872626.1	N utilization substance protein B
MAP_RS05600	MAP1099	WP_003872625.1	hypothetical protein
MAP_RS05605	MAP1100	WP_003872624.1	amino acid decarboxylase
MAP_RS05610	NA	WP_003872623.1	hypothetical protein
MAP_RS05615	MAP1101	WP_003872622.1	two-component sensor histidine kinase
MAP_RS05620	MAP1102c	WP_003872621.1	DNA-binding response regulator
MAP_RS05625	MAP1103c	WP_003877614.1	hypothetical protein
MAP_RS05630	MAP1104c	WP_003872619.1	hypothetical protein
MAP_RS05635	MAP1105	WP_003872618.1	GntR family transcriptional regulator
MAP_RS05640	MAP1106	WP_003872617.1	ferredoxin family protein
MAP_RS05645	MAP1108	NA	inference=COORDINATES: similar to AA sequence:RefSeq:WP_011725444.1
MAP_RS05650	MAP1109	WP_003872615.1	ABC transporter permease
MAP_RS05655	MAP1110	WP_003877618.1	ABC transporter ATP-binding protein
MAP_RS05660	MAP1111	WP_033713637.1	fumarate reductase/succinate dehydrogenase flavoprotein subunit
MAP_RS05665	MAP1112c	WP_003872612.1	N-acetyltransferase
MAP_RS05670	MAP1113c	WP_019305632.1	hypothetical protein
MAP_RS05675	MAP1114	WP_003872565.1	bifunctional pyrimidine operon transcriptional regulator/uracil phosphoribosyltransferase
MAP_RS05680	MAP1115	WP_003872564.1	aspartate carbamoyltransferase
MAP_RS05685	MAP1116	WP_003872563.1	gene=pyrC
MAP_RS05690	MAP1117	WP_003872562.1	hypothetical protein
MAP_RS05695	MAP1118	WP_003872561.1	carbamoyl-phosphate synthase small subunit
MAP_RS05700	MAP1119	WP_003872560.1	gene=carB
MAP_RS05705	MAP1120	WP_003872559.1	inference=COORDINATES: similar to AA sequence:RefSeq:NP_301456.1
MAP_RS05710	MAP1121c	WP_003872558.1	helix-turn-helix domain-containing protein
MAP_RS05715	MAP1122	WP_003872557.1	hypothetical protein
MAP_RS05720	MAP1123	WP_010949092.1	guanylate kinase
MAP_RS05725	MAP1124	WP_003872555.1	DNA-directed RNA polymerase subunit omega
MAP_RS05730	MAP1125	WP_003872554.1	bifunctional phosphopantothenoylcysteine decarboxylase/phosphopantothenate--cysteine ligase CoaBC
MAP_RS05735	MAP1126	WP_003872553.1	S-adenosylmethionine synthase
MAP_RS05740	MAP1127c	WP_010949093.1	NAD(P)/FAD-dependent oxidoreductase
MAP_RS05745	MAP1128c	WP_003877623.1	alpha/beta hydrolase
MAP_RS05750	MAP1129	WP_003877624.1	lysoplasmalogenase
MAP_RS05755	MAP1130	WP_003877625.1	inference=COORDINATES: similar to AA sequence:RefSeq:WP_020724950.1
MAP_RS05760	MAP1131	WP_003872548.1	MarR family transcriptional regulator
MAP_RS05765	MAP1132c	WP_003877626.1	class I SAM-dependent methyltransferase
MAP_RS05770	MAP1133	WP_003877627.1	methionyl-tRNA formyltransferase
MAP_RS05775	MAP1134	WP_003872545.1	16S rRNA m5C967 methyltransferase
MAP_RS05780	MAP1135	WP_085978602.1	inference=COORDINATES: similar to AA sequence:RefSeq:NP_215924.1
MAP_RS05785	MAP1136	WP_003872543.1	inference=COORDINATES: similar to AA sequence:RefSeq:WP_009977647.1
MAP_RS05790	MAP1137c	WP_003872542.1	MFS transporter
MAP_RS05795	MAP1138c	WP_003877628.1	LppX_LprAFG lipoprotein
MAP_RS05800	MAP1139	WP_003872540.1	riboflavin synthase
MAP_RS05805	MAP1140	WP_003877629.1	inference=COORDINATES: similar to AA sequence:RefSeq:WP_005146249.1
MAP_RS05810	MAP1141	WP_003877630.1	6%2C7-dimethyl-8-ribityllumazine synthase
MAP_RS05815	MAP1142	WP_003872537.1	membrane protein
MAP_RS05820	MAP1143c	WP_003877631.1	hemophore-related protein
MAP_RS05825	MAP1144c	WP_010949097.1	PPE family protein
MAP_RS05830	MAP1145c	WP_003877635.1	cupin
MAP_RS05835	MAP1146	WP_010949098.1	excinuclease ABC subunit C
MAP_RS05840	MAP1147	WP_003872531.1	RNase adapter RapZ
MAP_RS05845	MAP1148	WP_085978621.1	hypothetical protein
MAP_RS05850	MAP1149	WP_003872529.1	inference=COORDINATES: similar to AA sequence:RefSeq:NP_215939.1
MAP_RS05855	MAP1150c	WP_010948700.1	IS256 family transposase
MAP_RS22585	MAP1151c	WP_010949100.1	hypothetical protein
MAP_RS05860	MAP1152	WP_003877638.1	PPE family protein
MAP_RS05865	MAP1153	WP_003877639.1	PPE family protein
MAP_RS05870	MAP1154	WP_003877640.1	DUF732 domain-containing protein
MAP_RS05875	MAP1155	WP_003876047.1	PPE family protein
MAP_RS05880	MAP1156	WP_010949102.1	wax ester/triacylglycerol synthase family O-acyltransferase
MAP_RS05885	MAP1157c	WP_003877643.1	hypothetical protein
MAP_RS05890	MAP1158c	WP_003876050.1	alpha/beta hydrolase
MAP_RS05895	MAP1159c	WP_003876051.1	inference=COORDINATES: similar to AA sequence:RefSeq:WP_014380468.1
MAP_RS05900	MAP1160c	WP_003876052.1	glycerol acyltransferase
MAP_RS05905	MAP1161	WP_003876053.1	hypothetical protein
MAP_RS05910	MAP1162	WP_003876054.1	DUF3556 domain-containing protein
MAP_RS05915	MAP1163	WP_003877644.1	NAD(P)/FAD-dependent oxidoreductase
MAP_RS05920	MAP1164	WP_003876056.1	inference=COORDINATES: similar to AA sequence:RefSeq:WP_014385248.1
MAP_RS05925	MAP1165	WP_003877645.1	inference=COORDINATES: similar to AA sequence:RefSeq:WP_003877645.1
MAP_RS05930	MAP1166	WP_003876058.1	triose-phosphate isomerase
MAP_RS05935	MAP1167	WP_003876059.1	preprotein translocase subunit SecG
MAP_RS05940	MAP1168c	WP_003876060.1	TIGR03564 family F420-dependent LLM class oxidoreductase
MAP_RS05945	MAP1169	WP_003877648.1	phosphoenolpyruvate carboxylase
MAP_RS05950	MAP1170	WP_003877649.1	DUF4239 domain-containing protein
MAP_RS05955	MAP1171	WP_003876063.1	aldo/keto reductase
MAP_RS05960	MAP1172c	WP_003877650.1	acetoin utilization protein
MAP_RS05965	MAP1173c	WP_003876065.1	hypothetical protein
MAP_RS05970	MAP1174c	WP_003876066.1	inference=COORDINATES: similar to AA sequence:RefSeq:WP_011725402.1
MAP_RS05975	MAP1175c	WP_003877652.1	inference=COORDINATES: similar to AA sequence:RefSeq:WP_008258116.1
MAP_RS05980	MAP1176c	WP_009977591.1	glucose-6-phosphate dehydrogenase
MAP_RS05985	MAP1177c	WP_003876069.1	inference=COORDINATES: similar to AA sequence:RefSeq:NP_855135.1
MAP_RS05990	MAP1178c	WP_003876070.1	transketolase
MAP_RS05995	MAP1179	WP_003876071.1	protoheme IX farnesyltransferase
MAP_RS06000	MAP1180c	WP_003876072.1	quinone oxidoreductase
MAP_RS06005	MAP1181	WP_003876073.1	hypothetical protein
MAP_RS06010	MAP1182c	WP_003876074.1	heme A synthase
MAP_RS06015	MAP1183c	WP_003876075.1	multidrug ABC transporter permease
MAP_RS06020	MAP1184c	WP_003877656.1	ABC transporter ATP-binding protein
MAP_RS06025	MAP1185c	WP_003876077.1	membrane protein
MAP_RS06030	MAP1186	WP_085978486.1	transcriptional regulator
MAP_RS06035	MAP1187	WP_003876079.1	inference=COORDINATES: similar to AA sequence:RefSeq:YP_887437.1
MAP_RS06040	MAP1188	WP_003877658.1	inference=COORDINATES: similar to AA sequence:RefSeq:WP_003877658.1
MAP_RS06045	MAP1189	WP_003876081.1	inference=COORDINATES: similar to AA sequence:RefSeq:YP_887439.1
MAP_RS06050	MAP1190	WP_010949109.1	cysteine desulfurase
MAP_RS06055	MAP1191	WP_031344234.1	SUF system NifU family Fe-S cluster assembly protein
MAP_RS06060	MAP1192	WP_003876084.1	metal-sulfur cluster assembly factor
MAP_RS06065	MAP1193c	WP_003877660.1	hypothetical protein
MAP_RS06070	MAP1194c	WP_003877661.1	hypothetical protein
MAP_RS06075	NA	WP_003877662.1	hypothetical protein
MAP_RS06080	MAP1195c	WP_010949111.1	acyl-CoA dehydrogenase
MAP_RS06085	MAP1196	WP_003877663.1	inference=COORDINATES: similar to AA sequence:RefSeq:WP_003877663.1
MAP_RS06090	MAP1197	WP_003876089.1	inference=COORDINATES: similar to AA sequence:RefSeq:WP_003876089.1
MAP_RS06095	MAP1198	WP_010949112.1	ABC transporter ATP-binding protein
MAP_RS06100	MAP1199	WP_003876091.1	hypothetical protein
MAP_RS06105	MAP1200c	WP_003876092.1	TetR/AcrR family transcriptional regulator
MAP_RS06110	MAP1201c	WP_085978609.1	gene=acnA
MAP_RS06115	MAP1202	WP_003876094.1	hypothetical protein
MAP_RS06120	MAP1203	WP_003876095.1	peptidase M23
MAP_RS06125	MAP1204	WP_003876096.1	NlpC/P60 family protein
MAP_RS06130	MAP1205	WP_003876097.1	MoxR family ATPase
MAP_RS06135	MAP1206	WP_003876098.1	DUF58 domain-containing protein
MAP_RS06140	MAP1207	WP_003876099.1	VWA domain-containing protein
MAP_RS06145	NA	NA	inference=COORDINATES: similar to AA sequence:RefSeq:WP_009977547.1
MAP_RS06150	MAP1209	WP_003876102.1	beta-ketoacyl-ACP reductase
MAP_RS06155	MAP1210	WP_003877667.1	enoyl-[acyl-carrier-protein] reductase FabI
MAP_RS06160	MAP1211	WP_003876104.1	ferrochelatase
MAP_RS06165	MAP1212c	WP_003876105.1	hypothetical protein
MAP_RS06170	MAP1213	NA	inference=COORDINATES: similar to AA sequence:RefSeq:WP_008257952.1
MAP_RS06175	MAP1214	WP_003876107.1	SPFH/Band 7/PHB domain protein
MAP_RS06180	MAP1215	WP_003876108.1	hypothetical protein
MAP_RS06185	MAP1216c	WP_080505399.1	sensor domain-containing protein
MAP_RS22590	MAP1217c	WP_003876110.1	hypothetical protein
MAP_RS06190	MAP1218c	WP_003877669.1	hypothetical protein
MAP_RS06195	MAP1219c	WP_019305798.1	nitroreductase family deazaflavin-dependent oxidoreductase
MAP_RS06200	MAP1220c	WP_003876113.1	hypothetical protein
MAP_RS06205	MAP1221	WP_009977526.1	DNA-binding response regulator
MAP_RS06210	MAP1222	WP_003876115.1	sensor histidine kinase
MAP_RS22595	NA	WP_080505400.1	hypothetical protein
MAP_RS06215	MAP1223c	WP_003877672.1	hypothetical protein
MAP_RS06220	MAP1224c	WP_003876117.1	TVP38/TMEM64 family protein
MAP_RS06225	MAP1225	WP_003877673.1	inference=COORDINATES: similar to AA sequence:RefSeq:WP_003877673.1
MAP_RS06230	MAP1226	WP_003876119.1	methylmalonyl-CoA mutase
MAP_RS06235	MAP1227	WP_003877675.1	methylmalonyl Co-A mutase-associated GTPase MeaB
MAP_RS06240	MAP1228	WP_003877676.1	esterase
MAP_RS06245	MAP1229	WP_003877677.1	acyltransferase
MAP_RS06250	MAP1230	WP_010949123.1	sulfotransferase family protein
MAP_RS06255	MAP1231	WP_003876139.1	inference=COORDINATES: similar to AA sequence:RefSeq:WP_003876139.1
MAP_RS06260	MAP1232	WP_085978488.1	GDP-L-fucose synthase
MAP_RS22600	MAP1233	WP_010949125.1	FkbM family methyltransferase
MAP_RS06265	MAP1234	WP_003876142.1	glycosyltransferase
MAP_RS22605	MAP1235	WP_003876143.1	acyltransferase
MAP_RS06270	MAP1236c	WP_010949127.1	DrrC
MAP_RS06275	MAP1237c	WP_003876145.1	ABC transporter
MAP_RS06280	MAP1238c	WP_003876146.1	daunorubicin resistance protein DrrA family ABC transporter ATP-binding protein
MAP_RS06285	MAP1239c	WP_010949128.1	MMPL family RND transporter
MAP_RS06290	MAP1240c	WP_010949129.1	MMPL family RND transporter
MAP_RS06295	MAP1241c	WP_003876149.1	membrane protein
MAP_RS06300	NA	WP_003877688.1	MbtH family protein
MAP_RS06305	MAP1242	WP_010949130.1	non-ribosomal peptide synthetase
MAP_RS06310	MAP1243	WP_010949131.1	carboxymuconolactone decarboxylase family protein
MAP_RS06315	MAP1244	WP_003877690.1	nitronate monooxygenase
MAP_RS06320	MAP1245	WP_003876154.1	hypothetical protein
MAP_RS06325	MAP1246	WP_003877692.1	isoleucine--tRNA ligase
MAP_RS06330	MAP1247	WP_003877693.1	DUF559 domain-containing protein
MAP_RS06335	MAP1248	WP_003877694.1	inference=COORDINATES: similar to AA sequence:RefSeq:WP_009977452.1
MAP_RS06340	MAP1249c	WP_003876159.1	asparaginase
MAP_RS06345	MAP1250	WP_003877697.1	signal peptidase II
MAP_RS06350	MAP1251	WP_003877698.1	RluA family pseudouridine synthase
MAP_RS06355	MAP1252c	WP_010949132.1	class I SAM-dependent methyltransferase
MAP_RS06360	MAP1253c	WP_010949133.1	group 1 truncated hemoglobin GlbN
MAP_RS06365	MAP1254	NA	inference=COORDINATES: similar to AA sequence:RefSeq:NP_216059.1
MAP_RS06370	MAP1255	WP_003877701.1	NAD(P)-dependent oxidoreductase
MAP_RS06375	MAP1256	WP_003876166.1	SRPBCC family protein
MAP_RS06380	MAP1257	WP_010949135.1	DNA polymerase III subunit alpha
MAP_RS06385	MAP1258c	WP_003876168.1	PPOX class F420-dependent oxidoreductase
MAP_RS06390	MAP1259	WP_003876169.1	MerR family DNA-binding transcriptional regulator
MAP_RS06395	MAP1260	WP_003876170.1	long-chain fatty acid--CoA ligase
MAP_RS06400	MAP1261	WP_003877707.1	inference=COORDINATES: similar to AA sequence:RefSeq:WP_003876171.1
MAP_RS06405	MAP1262	WP_003876172.1	hypothetical protein
MAP_RS06410	MAP1263	WP_003876173.1	nitroreductase family deazaflavin-dependent oxidoreductase
MAP_RS06415	MAP1264	WP_003876174.1	threonine ammonia-lyase
MAP_RS22610	NA	WP_003877708.1	hypothetical protein
MAP_RS06420	MAP1265	WP_003877709.1	PAP2 family protein
MAP_RS06425	MAP1266c	NA	inference=COORDINATES: similar to AA sequence:RefSeq:WP_011725331.1
MAP_RS06430	MAP1267	WP_003877710.1	GntR family transcriptional regulator
MAP_RS06435	MAP1268c	WP_010949138.1	inference=COORDINATES: similar to AA sequence:RefSeq:WP_009977429.1
MAP_RS06440	MAP1269c	WP_010949139.1	inference=COORDINATES: similar to AA sequence:RefSeq:WP_003877712.1
MAP_RS06445	MAP1270c	WP_010949140.1	inference=COORDINATES: similar to AA sequence:RefSeq:WP_016706212.1
MAP_RS06450	MAP1271c	WP_003876182.1	acyltransferase
MAP_RS06455	MAP1272c	WP_003877715.1	hypothetical protein
MAP_RS06460	NA	WP_003876184.1	hypothetical protein
MAP_RS06465	MAP1274	WP_003876185.1	adenosylmethionine--8-amino-7-oxononanoate transaminase
MAP_RS06470	MAP1275	WP_003877716.1	8-amino-7-oxononanoate synthase
MAP_RS06475	MAP1276	WP_003877717.1	ATP-dependent dethiobiotin synthetase BioD
MAP_RS06480	MAP1277	WP_003876188.1	hypothetical protein
MAP_RS06485	MAP1278c	NA	inference=COORDINATES: similar to AA sequence:RefSeq:WP_003876189.1
MAP_RS06490	MAP1279c	WP_010949144.1	HAMP domain-containing protein
MAP_RS06495	MAP1280c	WP_003876191.1	hypothetical protein
MAP_RS06500	MAP1281c	WP_003876192.1	hypothetical protein
MAP_RS06505	MAP1282c	WP_019305725.1	hypothetical protein
MAP_RS06510	NA	WP_003876194.1	hypothetical protein
MAP_RS06515	MAP1283	WP_010949146.1	biotin synthase
MAP_RS06520	MAP1284	WP_003876196.1	hypothetical protein
MAP_RS06525	MAP1285	WP_003877723.1	DUF2567 domain-containing protein
MAP_RS06530	MAP1286c	WP_003876198.1	lipase
MAP_RS06535	MAP1287	WP_003876199.1	IS110 family transposase ISMpa1
MAP_RS06540	MAP1288c	WP_003877725.1	NUDIX hydrolase
MAP_RS06545	MAP1289	WP_003877726.1	quinolinate synthase
MAP_RS06550	MAP1290	WP_010949148.1	L-aspartate oxidase
MAP_RS06555	MAP1291	WP_003877730.1	nicotinate-nucleotide diphosphorylase (carboxylating)
MAP_RS06560	MAP1292c	WP_003876204.1	nitroreductase family deazaflavin-dependent oxidoreductase
MAP_RS06565	MAP1293	WP_003876205.1	inference=COORDINATES: similar to AA sequence:RefSeq:WP_014385124.1
MAP_RS06570	MAP1294	WP_003876206.1	histidinol-phosphate aminotransferase
MAP_RS06575	MAP1295	WP_003876207.1	imidazoleglycerol-phosphate dehydratase
MAP_RS06580	MAP1296	WP_003876208.1	inference=COORDINATES: similar to AA sequence:RefSeq:WP_009977381.1
MAP_RS06585	MAP1297	WP_003876209.1	bifunctional 1-(5-phosphoribosyl)-5-((5-phosphoribosylamino)methylideneamino)imidazole-4-carboxamide isomerase/phosphoribosylanthranilate isomerase PriA
MAP_RS06590	MAP1298	WP_003876210.1	inositol monophosphatase
MAP_RS06595	MAP1299	WP_003876211.1	imidazole glycerol phosphate synthase cyclase subunit
MAP_RS06600	MAP1300	WP_003877733.1	phosphoribosyl-AMP cyclohydrolase
MAP_RS06605	MAP1301	WP_003877734.1	ionic transporter y4hA
MAP_RS06610	MAP1302c	WP_003876214.1	peroxiredoxin
MAP_RS06615	MAP1303	WP_003876215.1	anthranilate synthase component I
MAP_RS06620	MAP1304	NA	inference=COORDINATES: similar to AA sequence:RefSeq:WP_008257759.1
MAP_RS06625	MAP1305	WP_003877736.1	indole-3-glycerol-phosphate synthase
MAP_RS06630	MAP1306	WP_019306031.1	inference=COORDINATES: similar to AA sequence:RefSeq:WP_003876218.1
MAP_RS06635	MAP1307	WP_003877737.1	tryptophan synthase subunit alpha
MAP_RS06640	MAP1308	WP_003876220.1	diacylglyceryl transferase
MAP_RS06645	MAP1309	WP_003876221.1	DUF2752 domain-containing protein
MAP_RS06650	MAP1310	WP_003877740.1	inference=COORDINATES: similar to AA sequence:RefSeq:NP_301922.1
MAP_RS06655	MAP1311	WP_003876223.1	acyl-CoA thioesterase II
MAP_RS06660	MAP1312	WP_003876224.1	DUF2156 domain-containing protein
MAP_RS06665	MAP1313c	NA	gene=cydC
MAP_RS06670	MAP1314c	WP_003876226.1	inference=COORDINATES: similar to AA sequence:RefSeq:WP_011725299.1
MAP_RS06675	MAP1315c	WP_003877743.1	inference=COORDINATES: similar to AA sequence:RefSeq:WP_009954947.1
MAP_RS06680	MAP1316c	WP_010949156.1	cytochrome ubiquinol oxidase subunit I
MAP_RS06685	MAP1317c	WP_010949157.1	membrane protein
MAP_RS06690	MAP1318c	WP_010949158.1	adenylate cyclase
MAP_RS06700	MAP1319	WP_003877747.1	response regulator
MAP_RS06705	MAP1320c	WP_003876232.1	acetyl-CoA acetyltransferase
MAP_RS06710	MAP1321c	WP_003876233.1	benzoylsuccinyl-CoA thiolase
MAP_RS06715	MAP1322	WP_033706220.1	DNA polymerase I
MAP_RS06720	MAP1323	WP_003876235.1	TetR/AcrR family transcriptional regulator
MAP_RS06725	MAP1324	WP_003876236.1	lignostilbene-alpha%2Cbeta-dioxygenase-like enzyme
MAP_RS06730	MAP1325	WP_003876237.1	30S ribosomal protein S1
MAP_RS06735	MAP1326	WP_003876238.1	dephospho-CoA kinase
MAP_RS06740	MAP1327c	WP_003876239.1	hypothetical protein
MAP_RS06745	MAP1328c	WP_003876240.1	Fpg/Nei family DNA glycosylase
MAP_RS06750	MAP1329c	WP_003876241.1	ATP-dependent DNA ligase
MAP_RS06755	MAP1330c	WP_003876242.1	DUF402 domain-containing protein
MAP_RS06760	MAP1331c	WP_073579004.1	ABC transporter ATP-binding protein
MAP_RS06765	MAP1332	WP_003877752.1	serine/threonine protein kinase
MAP_RS06770	NA	WP_015632671.1	hypothetical protein
MAP_RS06775	MAP1333	WP_003877754.1	hypothetical protein
MAP_RS06780	MAP1334	WP_015632670.1	hypothetical protein
MAP_RS06785	MAP1335	WP_003876248.1	inference=COORDINATES: similar to AA sequence:RefSeq:WP_009954231.1
MAP_RS06790	MAP1336	NA	inference=COORDINATES: similar to AA sequence:RefSeq:WP_014942317.1
MAP_RS06795	MAP1337c	WP_003876250.1	membrane protein
MAP_RS06800	MAP1338c	WP_033707580.1	membrane protein
MAP_RS22615	NA	NA	inference=COORDINATES: similar to AA sequence:RefSeq:WP_014385106.1
MAP_RS06805	MAP1339	WP_003876252.1	universal stress protein
MAP_RS06810	MAP1340c	WP_003877758.1	MBL fold metallo-hydrolase
MAP_RS06815	MAP1341	WP_003876254.1	excinuclease ABC subunit UvrA
MAP_RS06820	MAP1342c	WP_003876255.1	hypothetical protein
MAP_RS06825	MAP1343	WP_003876256.1	hypothetical protein
MAP_RS06830	MAP1344	WP_010949167.1	cytochrome P450
MAP_RS06835	MAP1345	WP_003876258.1	class I SAM-dependent methyltransferase
MAP_RS06840	NA	NA	inference=COORDINATES: similar to AA sequence:RefSeq:WP_007776087.1
MAP_RS06845	MAP1348c	WP_010949170.1	hypothetical protein
MAP_RS06850	MAP1349c	WP_003876262.1	TetR/AcrR family transcriptional regulator
MAP_RS06855	NA	WP_003876263.1	hypothetical protein
MAP_RS06860	MAP1350c	WP_003877764.1	hypothetical protein
MAP_RS06865	MAP1351c	WP_085978599.1	bifunctional lysylphosphatidylglycerol synthetase/lysine--tRNA ligase LysX
MAP_RS06870	MAP1352	WP_073579001.1	translation initiation factor IF-3
MAP_RS06875	MAP1353	WP_003876267.1	inference=COORDINATES: similar to AA sequence:RefSeq:WP_003876267.1
MAP_RS06880	MAP1354	WP_003876268.1	50S ribosomal protein L20
MAP_RS06885	MAP1355	WP_003876269.1	RNA methyltransferase
MAP_RS06890	MAP1356c	WP_003876270.1	DUF2236 domain-containing protein
MAP_RS06895	MAP1357	NA	inference=COORDINATES: similar to AA sequence:RefSeq:WP_014711891.1
MAP_RS06900	MAP1358	WP_003876272.1	hypothetical protein
MAP_RS06905	MAP1359	WP_003877766.1	phenylalanine--tRNA ligase subunit alpha
MAP_RS06910	MAP1360	WP_010949175.1	phenylalanine--tRNA ligase subunit beta
MAP_RS06915	MAP1361	WP_003876275.1	N-acetyl-gamma-glutamyl-phosphate reductase
MAP_RS06920	MAP1362	WP_003876276.1	bifunctional glutamate N-acetyltransferase/amino-acid N-acetyltransferase
MAP_RS06925	MAP1363	WP_003876277.1	inference=COORDINATES: similar to AA sequence:RefSeq:WP_009977302.1
MAP_RS06930	MAP1364	WP_010949176.1	acetylornithine transaminase
MAP_RS06935	MAP1365	WP_003877772.1	inference=COORDINATES: similar to AA sequence:RefSeq:WP_003877772.1
MAP_RS06940	MAP1366	WP_003876280.1	arginine repressor
MAP_RS06945	MAP1367	WP_003877773.1	argininosuccinate synthase
MAP_RS06950	MAP1368	WP_003876282.1	inference=COORDINATES: similar to AA sequence:RefSeq:WP_003876282.1
MAP_RS06955	MAP1369	WP_003876283.1	type III polyketide synthase
MAP_RS06960	MAP1370	NA	inference=COORDINATES: similar to AA sequence:RefSeq:WP_014380320.1
MAP_RS06965	MAP1371	WP_010949178.1	polyketide synthase
MAP_RS06970	MAP1372	WP_003877778.1	polyketide synthase
MAP_RS06975	MAP1373c	WP_003877779.1	cytochrome P450
MAP_RS06980	MAP1374c	WP_003877780.1	ABC transporter ATP-binding protein
MAP_RS06985	NA	NA	inference=COORDINATES: similar to AA sequence:RefSeq:WP_008257606.1
MAP_RS06990	MAP1376c	WP_003876290.1	LysR family transcriptional regulator
MAP_RS06995	MAP1377	WP_015632666.1	NAD(P)-dependent oxidoreductase
MAP_RS07000	MAP1378	NA	inference=COORDINATES: similar to AA sequence:RefSeq:WP_003876292.1
MAP_RS07005	MAP1379	WP_003876293.1	hypothetical protein
MAP_RS07010	MAP1380	WP_003876294.1	NAD(P)-dependent oxidoreductase
MAP_RS07015	MAP1381	WP_003877785.1	NAD(P)-dependent oxidoreductase
MAP_RS07020	MAP1382c	WP_003876296.1	mandelate racemase
MAP_RS07025	MAP1383c	WP_003876297.1	KR domain-containing protein
MAP_RS07030	MAP1384c	WP_010949181.1	glycoside hydrolase family 15 protein
MAP_RS07035	MAP1385c	WP_003877788.1	GMC family oxidoreductase
MAP_RS07040	MAP1386c	WP_003876300.1	hypothetical protein
MAP_RS07045	MAP1387c	WP_003876301.1	hypothetical protein
MAP_RS07050	MAP1388	WP_019694664.1	hypothetical protein
MAP_RS07055	MAP1389	WP_010949185.1	inference=COORDINATES: similar to AA sequence:RefSeq:WP_010949185.1
MAP_RS07060	MAP1390	WP_003876304.1	hypothetical protein
MAP_RS07065	MAP1391c	WP_003876305.1	TetR/AcrR family transcriptional regulator
MAP_RS07070	MAP1392c	WP_073578915.1	antibiotic ABC transporter permease
MAP_RS07075	MAP1393c	WP_003877791.1	ABC transporter ATP-binding protein
MAP_RS07080	MAP1394c	WP_003877792.1	ammonium transporter
MAP_RS07085	MAP1395	WP_003876309.1	DNA-3-methyladenine glycosylase
MAP_RS07090	MAP1396	WP_010949186.1	tyrosine--tRNA ligase
MAP_RS07095	MAP1397	WP_003877794.1	DUF732 domain-containing protein
MAP_RS07100	MAP1398	WP_010949187.1	hypothetical protein
MAP_RS07105	MAP1399	WP_010949188.1	haloacid dehalogenase
MAP_RS07110	MAP1400	WP_003876314.1	hypothetical protein
MAP_RS07115	MAP1401	WP_003876315.1	TlyA family RNA methyltransferase
MAP_RS07120	MAP1402	WP_003876316.1	NAD(+) kinase
MAP_RS07125	MAP1403	WP_003876317.1	inference=COORDINATES: similar to AA sequence:RefSeq:NP_216212.1
MAP_RS07130	MAP1404	WP_003876318.1	hypothetical protein
MAP_RS07135	MAP1405	WP_003876319.1	copper transporter
MAP_RS07140	MAP1406	WP_003876320.1	CTP synthetase
MAP_RS07145	MAP1407	WP_003876321.1	NUDIX hydrolase
MAP_RS07150	MAP1408	WP_003876322.1	inference=COORDINATES: similar to AA sequence:RefSeq:NP_216217.1
MAP_RS07155	MAP1409c	WP_003876323.1	O-methyltransferase
MAP_RS07160	MAP1410	WP_003876324.1	ParA family protein
MAP_RS07165	MAP1411	WP_003876325.1	segregation/condensation protein A
MAP_RS07170	MAP1412	WP_003877803.1	inference=COORDINATES: similar to AA sequence:RefSeq:WP_009977237.1
MAP_RS07175	MAP1413	WP_003876327.1	rRNA pseudouridine synthase
MAP_RS07180	MAP1414	WP_003876328.1	cytidylate kinase
MAP_RS07185	MAP1415	WP_003877804.1	GTPase Der
MAP_RS07195	MAP1416c	WP_003876330.1	DUF2510 domain-containing protein
MAP_RS07200	MAP1417c	WP_003877806.1	DUF4383 domain-containing protein
MAP_RS07205	MAP1418c	WP_003876332.1	GAP family protein
MAP_RS07210	MAP1419	WP_003877808.1	MbtH family protein
MAP_RS07215	MAP1420	WP_010949191.1	non-ribosomal peptide synthetase
MAP_RS07220	MAP1421	WP_010949192.1	inference=COORDINATES: similar to AA sequence:RefSeq:WP_014815280.1
MAP_RS07225	MAP1422	WP_003877812.1	N-acetylglutaminylglutamine synthetase
MAP_RS07230	MAP1423	WP_003877813.1	MFS transporter
MAP_RS07235	MAP1424c	WP_019699544.1	hypothetical protein
MAP_RS07240	MAP1425c	WP_003876373.1	pyrimidine reductase family protein
MAP_RS07245	MAP1426c	WP_003877816.1	flavin reductase
MAP_RS07250	MAP1427	WP_016706252.1	copper oxidase
MAP_RS07255	MAP1428c	WP_003877817.1	hypothetical protein
MAP_RS07260	MAP1429	WP_003877818.1	hypothetical protein
MAP_RS07265	MAP1430c	WP_003876379.1	TIGR03619 family F420-dependent LLM class oxidoreductase
MAP_RS07270	MAP1431	WP_010949200.1	PadR family transcriptional regulator
MAP_RS07275	MAP1432	WP_040963252.1	HNH endonuclease
MAP_RS07280	MAP1433c	WP_010949202.1	inference=COORDINATES: similar to AA sequence:RefSeq:WP_011725215.1
MAP_RS07285	MAP1434	WP_003877825.1	3-ketosteroid-9-alpha-hydroxylase subunit A
MAP_RS07290	NA	WP_015632663.1	hypothetical protein
MAP_RS07295	MAP1435	WP_031350919.1	short-chain dehydrogenase
MAP_RS07300	MAP1436c	WP_003877828.1	NAD(P)-dependent oxidoreductase
MAP_RS07305	MAP1437c	NA	inference=COORDINATES: similar to AA sequence:RefSeq:YP_887194.1
MAP_RS07310	MAP1438c	WP_003877831.1	alpha/beta hydrolase
MAP_RS07315	MAP1439c	WP_003877832.1	SDR family oxidoreductase
MAP_RS07320	MAP1440c	WP_003876383.1	polyketide cyclase
MAP_RS07325	MAP1441	WP_019305769.1	FAD-binding protein
MAP_RS07330	MAP1442	WP_003877833.1	NAD(P)-dependent oxidoreductase
MAP_RS07335	MAP1443c	WP_003876387.1	stress responsive protein
MAP_RS07340	MAP1444c	WP_003877834.1	hypothetical protein
MAP_RS07345	MAP1445c	WP_003877835.1	alpha/beta hydrolase
MAP_RS07350	MAP1446c	WP_003877836.1	IclR family transcriptional regulator
MAP_RS07355	MAP1447c	WP_010949211.1	FAD-binding protein
MAP_RS07360	NA	NA	gene=bphC
MAP_RS07365	MAP1448c	WP_003876394.1	hydroxylase
MAP_RS07370	MAP1449c	WP_003876395.1	NAD(P)-dependent oxidoreductase
MAP_RS07375	MAP1450c	WP_010949212.1	NAD(P)/FAD-dependent oxidoreductase
MAP_RS07380	MAP1451	WP_003876397.1	NAD(P)-dependent oxidoreductase
MAP_RS07385	MAP1452c	WP_016706257.1	alpha/beta hydrolase
MAP_RS07390	MAP1453c	WP_003876399.1	wax ester/triacylglycerol synthase family O-acyltransferase
MAP_RS22620	NA	NA	inference=COORDINATES: similar to AA sequence:RefSeq:WP_014942022.1
MAP_RS07395	NA	WP_003876401.1	CsbD family protein
MAP_RS07400	MAP1455c	WP_003876402.1	NAD(P)-dependent oxidoreductase
MAP_RS07405	MAP1456	WP_015632660.1	putative esteraselipase
MAP_RS07410	MAP1457	NA	inference=COORDINATES: similar to AA sequence:RefSeq:WP_014380244.1
MAP_RS07415	MAP1458	WP_003876407.1	acyl-CoA dehydrogenase
MAP_RS07420	MAP1459	WP_003877849.1	acyl-CoA dehydrogenase
MAP_RS07425	MAP1460	WP_003876409.1	acyl dehydratase
MAP_RS07430	MAP1461	WP_003877850.1	acyl dehydratase
MAP_RS07435	MAP1462	WP_003876411.1	thiolase family protein
MAP_RS07440	NA	WP_003876412.1	acyl dehydratase
MAP_RS07445	MAP1463	WP_003876414.1	NAD(P)/FAD-dependent oxidoreductase
MAP_RS07450	MAP1464	WP_003877851.1	inference=COORDINATES: similar to AA sequence:RefSeq:WP_003877851.1
MAP_RS07455	MAP1465c	WP_010949221.1	HNH endonuclease
MAP_RS07460	MAP1466c	WP_003876439.1	aminopeptidase P family protein
MAP_RS07465	MAP1467c	WP_015632658.1	aminopeptidase P family protein
MAP_RS07470	MAP1468c	WP_003876441.1	short chain dehydrogenase
MAP_RS07475	MAP1469c	WP_003876442.1	cytochrome P450
MAP_RS07480	MAP1470c	WP_019306097.1	TetR family transcriptional regulator
MAP_RS07485	MAP1471	WP_003876444.1	nitroreductase family deazaflavin-dependent oxidoreductase
MAP_RS07490	MAP1472c	WP_003876445.1	hypothetical protein
MAP_RS07495	MAP1473c	WP_003876446.1	hypothetical protein
MAP_RS07500	MAP1474c	WP_003876447.1	inference=COORDINATES: similar to AA sequence:RefSeq:WP_003876447.1
MAP_RS07505	MAP1475	WP_010949225.1	NAD(P)-dependent oxidoreductase
MAP_RS07510	MAP1476c	WP_003876449.1	cutinase family protein
MAP_RS07515	MAP1477c	WP_003876450.1	TetR/AcrR family transcriptional regulator
MAP_RS07520	MAP1478	WP_019305623.1	N-acyl-D-glutamate deacylase
MAP_RS07525	MAP1479c	WP_010949228.1	TetR/AcrR family transcriptional regulator
MAP_RS07530	MAP1480	WP_003876453.1	class I SAM-dependent methyltransferase
MAP_RS07535	MAP1481c	WP_040963253.1	ATP-dependent helicase
MAP_RS07540	MAP1482	WP_003877871.1	hypothetical protein
MAP_RS07545	MAP1483c	WP_010949231.1	FAD-binding protein
MAP_RS07550	MAP1484c	WP_010949232.1	aromatic ring-hydroxylating dioxygenase subunit alpha
MAP_RS07560	MAP1485c	NA	inference=COORDINATES: similar to AA sequence:RefSeq:WP_008257094.1
MAP_RS07565	MAP1486c	WP_003877873.1	enoyl-CoA hydratase
MAP_RS07570	NA	WP_003877874.1	dihydrolipoamide acetyltransferase
MAP_RS07575	MAP1487c	WP_003877875.1	pyruvate dehydrogenase subunit beta
MAP_RS07580	MAP1488c	WP_003877876.1	thiamine pyrophosphate-dependent dehydrogenase E1 component subunit alpha
MAP_RS07585	MAP1489c	WP_010949234.1	NAD(P)-dependent oxidoreductase
MAP_RS07590	MAP1490	NA	inference=COORDINATES: similar to AA sequence:RefSeq:WP_014212963.1
MAP_RS07595	MAP1492	WP_003876458.1	transcription antitermination regulator
MAP_RS07600	MAP1493c	WP_010949237.1	DUF4407 domain-containing protein
MAP_RS07605	MAP1494	WP_003876460.1	hypothetical protein
MAP_RS07610	MAP1495	WP_003877879.1	SRPBCC family protein
MAP_RS07615	MAP1496c	WP_003876462.1	hypothetical protein
MAP_RS07620	MAP1497c	WP_003877880.1	oxidoreductase
MAP_RS07625	MAP1498c	WP_003876464.1	nuclear transport factor 2 family protein
MAP_RS07630	MAP1499c	WP_003876465.1	TIGR03619 family F420-dependent LLM class oxidoreductase
MAP_RS07635	MAP1500c	WP_003877882.1	inference=COORDINATES: similar to AA sequence:RefSeq:WP_009977071.1
MAP_RS07640	MAP1501	WP_003877883.1	inference=COORDINATES: similar to AA sequence:RefSeq:NP_216298.1
MAP_RS07645	MAP1502	WP_003877884.1	type VII secretion protein EccC
MAP_RS07650	MAP1503c	NA	inference=COORDINATES: similar to AA sequence:RefSeq:WP_003876469.1
MAP_RS07655	MAP1504	WP_003876470.1	ferredoxin
MAP_RS07660	MAP1505	WP_010949243.1	PPE family protein
MAP_RS07665	NA	WP_003876472.1	hypothetical protein
MAP_RS07670	MAP1506	WP_019305904.1	PPE family protein
MAP_RS07675	MAP1507	WP_010949245.1	PE family protein
MAP_RS07680	MAP1508	WP_003874404.1	WXG100 family type VII secretion target
MAP_RS07685	NA	WP_003874405.1	hypothetical protein
MAP_RS07690	MAP1509	WP_003877890.1	ESX secretion-associated protein EspG
MAP_RS07695	MAP1510	WP_010949246.1	inference=COORDINATES: similar to AA sequence:RefSeq:WP_011725134.1
MAP_RS07700	MAP1511	WP_003877892.1	type VII secretion system ESX-5 serine protease mycosin MycP5
MAP_RS07705	MAP1512	WP_003877893.1	inference=COORDINATES: similar to AA sequence:RefSeq:WP_014942105.1
MAP_RS07710	MAP1513	WP_003877894.1	inference=COORDINATES: similar to AA sequence:RefSeq:WP_003877894.1
MAP_RS07715	MAP1514	WP_003876480.1	PE family protein
MAP_RS07720	MAP1515	WP_003877896.1	PPE family protein
MAP_RS07725	MAP1516	WP_010949247.1	PPE family protein
MAP_RS07730	MAP1517	WP_003876483.1	DUF732 domain-containing protein
MAP_RS07735	MAP1518	WP_003876484.1	PPE family protein
MAP_RS07740	MAP1519	WP_003876485.1	PPE family protein
MAP_RS07745	MAP1520	WP_010949249.1	DUF732 domain-containing protein
MAP_RS07750	NA	WP_003876487.1	DUF732 domain-containing protein
MAP_RS07755	MAP1521	WP_003876488.1	PPE family protein
MAP_RS07760	MAP1522	WP_003876489.1	PPE family protein
MAP_RS07765	MAP1523	WP_003876490.1	DUF732 domain-containing protein
MAP_RS07770	MAP1524	WP_003876491.1	MgtC/SapB family protein
MAP_RS07775	MAP1525	WP_010949250.1	sterol desaturase family protein
MAP_RS07780	MAP1526	WP_003876493.1	hypothetical protein
MAP_RS07785	MAP1527c	WP_003877902.1	DUF385 domain-containing protein
MAP_RS07790	MAP1528	WP_003876495.1	TetR/AcrR family transcriptional regulator
MAP_RS07795	MAP1529	WP_003876496.1	VOC family protein
MAP_RS07800	MAP1530	WP_003877904.1	FAD-binding protein
MAP_RS07805	MAP1531c	WP_003876498.1	ABC transporter ATP-binding protein/permease
MAP_RS07810	NA	NA	inference=COORDINATES: similar to AA sequence:RefSeq:NP_216336.1
MAP_RS07815	MAP1534	WP_003877905.1	inference=COORDINATES: similar to AA sequence:RefSeq:NP_302388.1
MAP_RS07820	MAP1535	WP_003877907.1	CDP-alcohol phosphatidyltransferase family protein
MAP_RS07825	MAP1536	WP_003876503.1	DUF881 domain-containing protein
MAP_RS07830	MAP1537	WP_003876504.1	DUF1290 domain-containing protein
MAP_RS07835	MAP1538	WP_003876505.1	DUF881 domain-containing protein
MAP_RS07840	MAP1539	WP_003876506.1	inference=COORDINATES: similar to AA sequence:RefSeq:NP_302386.1
MAP_RS07845	MAP1540	WP_009977020.1	peptide-binding protein
MAP_RS07850	MAP1541	WP_003876508.1	MerR family transcriptional regulator
MAP_RS07855	MAP1542	WP_003876509.1	bifunctional nuclease family protein
MAP_RS07860	MAP1543	WP_003876510.1	MerR family transcriptional regulator
MAP_RS07865	MAP1545	WP_010949258.1	inference=COORDINATES: similar to AA sequence:RefSeq:NP_216348.1
MAP_RS07870	MAP1546c	WP_003876512.1	TetR family transcriptional regulator
MAP_RS07875	MAP1547c	WP_003876513.1	DUF2236 domain-containing protein
MAP_RS07880	MAP1548c	WP_003877909.1	hypothetical protein
MAP_RS07885	MAP1549c	WP_003876515.1	malate synthase G
MAP_RS07890	MAP1550c	WP_003877910.1	HlyC/CorC family transporter
MAP_RS07895	MAP1551c	WP_003876517.1	HlyC/CorC family transporter
MAP_RS07900	NA	NA	inference=COORDINATES: similar to AA sequence:RefSeq:WP_005142959.1
MAP_RS07905	MAP1553c	WP_003877913.1	acyl-CoA dehydrogenase
MAP_RS07910	MAP1554c	WP_003877914.1	inference=COORDINATES: similar to AA sequence:RefSeq:WP_009977007.1
MAP_RS07915	MAP1555c	WP_019306489.1	inference=COORDINATES: similar to AA sequence:RefSeq:WP_019306489.1
MAP_RS07920	MAP1556c	WP_003876521.1	GuaB1 family IMP dehydrogenase-related protein
MAP_RS07925	MAP1557c	WP_003876522.1	phosphogluconate dehydrogenase (NADP(+)-dependent%2C decarboxylating)
MAP_RS07930	MAP1558c	WP_003876523.1	M56 family peptidase
MAP_RS07935	MAP1559c	WP_003876524.1	transcriptional regulator
MAP_RS07940	MAP1560	WP_003876525.1	PaaI family thioesterase
MAP_RS07945	MAP1561c	WP_003876526.1	NAD(P)/FAD-dependent oxidoreductase
MAP_RS07950	MAP1562c	WP_003876527.1	DUF4189 domain-containing protein
MAP_RS07955	MAP1563c	WP_003877921.1	TIGR03560 family F420-dependent LLM class oxidoreductase
MAP_RS07960	MAP1564c	WP_003877922.1	short-chain dehydrogenase
MAP_RS07965	MAP1565	WP_003876530.1	inference=COORDINATES: similar to AA sequence:RefSeq:WP_009976993.1
MAP_RS07970	MAP1566	WP_003876531.1	DUF2236 domain-containing protein
MAP_RS07975	MAP1567	WP_003877924.1	inference=COORDINATES: similar to AA sequence:RefSeq:WP_003877924.1
MAP_RS07980	MAP1568	WP_003877926.1	molybdenum ABC transporter ATP-binding protein
MAP_RS07985	MAP1569	WP_003877927.1	hypothetical protein
MAP_RS07990	MAP1570	WP_003876535.1	GlsB/YeaQ/YmgE family stress response membrane protein
MAP_RS07995	MAP1571	WP_031351246.1	zinc-binding alcohol dehydrogenase family protein
MAP_RS08000	MAP1572c	WP_003877929.1	CPBP family intramembrane metalloprotease
MAP_RS08005	MAP1573c	WP_003876539.1	phosphoketolase
MAP_RS08010	MAP1574c	WP_003876540.1	NAD(P)-dependent oxidoreductase
MAP_RS08015	MAP1575c	WP_003876541.1	undecaprenyl-diphosphatase
MAP_RS08020	MAP1576	WP_003877930.1	CoA transferase
MAP_RS08025	MAP1577	WP_003877931.1	inference=COORDINATES: similar to AA sequence:RefSeq:NP_216383.1
MAP_RS08030	MAP1578	WP_003877932.1	hypothetical protein
MAP_RS08035	MAP1579c	WP_010949265.1	pyridine nucleotide-disulfide oxidoreductase
MAP_RS08040	MAP1580c	WP_003876546.1	DUF72 domain-containing protein
MAP_RS08045	MAP1581c	WP_003876547.1	endonuclease
MAP_RS08050	MAP1582c	WP_003877934.1	RNA methyltransferase
MAP_RS08055	MAP1583c	WP_003877935.1	nitroreductase family deazaflavin-dependent oxidoreductase
MAP_RS08060	MAP1584c	WP_016706286.1	inference=COORDINATES: similar to AA sequence:RefSeq:WP_014942163.1
MAP_RS08065	MAP1585c	WP_010949268.1	alpha-hydroxy-acid oxidizing protein
MAP_RS08070	MAP1586	WP_003876552.1	DUF1810 domain-containing protein
MAP_RS08075	MAP1587c	WP_003876553.1	DUF3459 domain-containing protein
MAP_RS08080	MAP1588c	WP_003876554.1	alkyl hydroperoxide reductase AhpD
MAP_RS08085	MAP1589c	WP_003876555.1	peroxiredoxin
MAP_RS08090	MAP1590	WP_015632654.1	hydrogen peroxide-inducible genes activator
MAP_RS08095	MAP1591	WP_085978491.1	hypothetical protein
MAP_RS08100	MAP1592	WP_003876558.1	TIGR03618 family F420-dependent PPOX class oxidoreductase
MAP_RS08105	MAP1593	WP_003876559.1	crotonase
MAP_RS08110	MAP1594c	WP_003876560.1	(2Fe-2S)-binding protein
MAP_RS08115	MAP1595	WP_003876561.1	inference=COORDINATES: similar to AA sequence:RefSeq:WP_003876561.1
MAP_RS08120	MAP1596	WP_010949271.1	MFS transporter
MAP_RS08125	MAP1597	WP_003876563.1	carboxymuconolactone decarboxylase family protein
MAP_RS08130	MAP1598	WP_003876564.1	TIGR03854 family LLM class F420-dependent oxidoreductase
MAP_RS08135	MAP1599	WP_003877940.1	glutamine synthetase
MAP_RS08140	MAP1600	WP_003876566.1	amidohydrolase
MAP_RS08145	MAP1601	WP_003876568.1	hypothetical protein
MAP_RS08150	MAP1602c	WP_003876569.1	limonene-1%2C2-epoxide hydrolase
MAP_RS08155	MAP1603c	WP_003877942.1	cytochrome P450
MAP_RS08160	MAP1604c	WP_003876571.1	hypothetical protein
MAP_RS08165	MAP1605c	WP_003877943.1	short-chain dehydrogenase
MAP_RS08170	MAP1606c	WP_003876573.1	SRPBCC family protein
MAP_RS08175	MAP1607c	WP_033706294.1	Resuscitation-promoting factor RpfC
MAP_RS08180	MAP1608c	WP_003876575.1	gamma subclass chorismate mutase AroQ
MAP_RS08185	MAP1609c	WP_010949276.1	esterase family protein
MAP_RS22625	MAP1610	WP_010949277.1	hypothetical protein
MAP_RS08190	MAP1611	WP_010949278.1	hypothetical protein
MAP_RS08195	MAP1612c	WP_003877946.1	YceI family protein
MAP_RS08200	MAP1613c	WP_003876579.1	Zn-dependent alcohol dehydrogenase
MAP_RS08205	MAP1614c	WP_003876580.1	cytochrome P450
MAP_RS08210	MAP1615	WP_003876581.1	hypothetical protein
MAP_RS08215	MAP1616	WP_010949279.1	hypothetical protein
MAP_RS08220	MAP1617	WP_003876583.1	hypothetical protein
MAP_RS08225	MAP1618c	WP_003876584.1	nitronate monooxygenase
MAP_RS08230	MAP1619	WP_003877948.1	HNH endonuclease
MAP_RS08235	MAP1620	NA	inference=COORDINATES: similar to AA sequence:RefSeq:WP_011725059.1
MAP_RS08240	MAP1621	WP_010949281.1	dehydrogenase
MAP_RS08245	MAP1622c	WP_003876602.1	SAM-dependent methyltransferase
MAP_RS08250	MAP1623c	WP_003876603.1	D-tyrosyl-tRNA(Tyr) deacylase
MAP_RS08255	MAP1624	WP_003876604.1	thiamine-binding protein
MAP_RS08260	MAP1625	WP_010949282.1	cinA-like protein
MAP_RS08265	MAP1626c	WP_033706239.1	MFS transporter
MAP_RS08270	MAP1627	WP_003876607.1	amidohydrolase
MAP_RS08275	MAP1628	WP_003876608.1	phage holin family protein
MAP_RS08280	MAP1629c	WP_010949284.1	FAD-binding oxidoreductase
MAP_RS22630	MAP1630c	WP_019683574.1	hypothetical protein
MAP_RS22635	NA	NA	gbkey=CDS
MAP_RS22640	MAP1631c	WP_010949286.1	TetR/AcrR family transcriptional regulator
MAP_RS08295	MAP1632c	WP_019305736.1	MFS transporter
MAP_RS08300	MAP1633c	WP_003876613.1	DoxX family protein
MAP_RS08305	NA	WP_003876614.1	hypothetical protein
MAP_RS22645	MAP1634	WP_010949289.1	transcriptional regulator
MAP_RS08310	MAP1635c	WP_003876616.1	UbiX family flavin prenyltransferase
MAP_RS08315	MAP1636c	WP_003877955.1	hypothetical protein
MAP_RS08320	MAP1637c	WP_016706304.1	UbiD family decarboxylase
MAP_RS08325	MAP1638c	WP_010949291.1	hypothetical protein
MAP_RS08330	MAP1639c	WP_003876620.1	cyclase
MAP_RS08335	MAP1640c	WP_003876621.1	SRPBCC domain-containing protein
MAP_RS08340	MAP1641c	WP_033706428.1	ArsR family transcriptional regulator
MAP_RS08345	MAP1642	WP_003877961.1	MBL fold hydrolase
MAP_RS08350	MAP1643	WP_003876624.1	isocitrate lyase
MAP_RS22650	NA	NA	inference=COORDINATES: similar to AA sequence:RefSeq:WP_014380146.1
MAP_RS08360	MAP1645	WP_003876625.1	LLM class flavin-dependent oxidoreductase
MAP_RS08365	MAP1646c	WP_003876626.1	SRPBCC family protein
MAP_RS08370	MAP1647	WP_003877962.1	inference=COORDINATES: similar to AA sequence:RefSeq:WP_003876627.1
MAP_RS08375	MAP1648	WP_003876628.1	hypothetical protein
MAP_RS08380	MAP1649c	WP_003876629.1	3-oxoacyl-ACP reductase
MAP_RS08385	MAP1650	WP_003876630.1	nuclear transport factor 2 family protein
MAP_RS08390	MAP1651c	WP_003876631.1	DJ-1/PfpI family protein
MAP_RS08395	MAP1652c	WP_033706553.1	GlxA family transcriptional regulator
MAP_RS08400	MAP1653	WP_003876633.1	thiol peroxidase
MAP_RS08405	MAP1654c	WP_003876634.1	nitronate monooxygenase
MAP_RS08410	MAP1655c	WP_003876635.1	RNA-binding protein
MAP_RS08415	MAP1656	WP_003877964.1	acyl-CoA dehydrogenase
MAP_RS08420	MAP1657	WP_003877965.1	oxidoreductase
MAP_RS08425	MAP1658	WP_015632651.1	aldehyde dehydrogenase
MAP_RS08430	NA	WP_003876639.1	hypothetical protein
MAP_RS08435	MAP1659	WP_003876640.1	hypothetical protein
MAP_RS08440	MAP1660	WP_010949298.1	SAM-dependent methyltransferase
MAP_RS08445	MAP1661c	WP_003876642.1	glycoside hydrolase family 16 protein
MAP_RS22655	NA	WP_080505401.1	hypothetical protein
MAP_RS08450	MAP1662c	WP_003877966.1	cutinase family protein
MAP_RS08455	MAP1663	WP_003877967.1	class I SAM-dependent methyltransferase
MAP_RS08460	MAP1664c	WP_003876646.1	hypothetical protein
MAP_RS08465	MAP1665c	WP_003876647.1	class I SAM-dependent methyltransferase
MAP_RS08470	MAP1666c	WP_003876648.1	glycosyltransferase family 1 protein
MAP_RS08475	MAP1667	WP_010949301.1	DUF1906 domain-containing protein
MAP_RS08480	MAP1668c	WP_003877970.1	inference=COORDINATES: similar to AA sequence:RefSeq:YP_887765.1
MAP_RS08485	MAP1669c	WP_019306305.1	transcriptional repressor
MAP_RS08490	MAP1670c	WP_010949303.1	hypothetical protein
MAP_RS08495	MAP1671	WP_003876653.1	hypothetical protein
MAP_RS08500	MAP1672	WP_033706653.1	FAD-dependent oxidoreductase
MAP_RS08505	MAP1673c	WP_010949305.1	class I SAM-dependent methyltransferase
MAP_RS08510	MAP1674c	WP_003876656.1	glycosyltransferase
MAP_RS08515	MAP1676	NA	inference=COORDINATES: similar to AA sequence:RefSeq:WP_003876657.1
MAP_RS08520	MAP1677	WP_003876658.1	hypothetical protein
MAP_RS08525	MAP1678	WP_003876659.1	MOSC domain-containing protein
MAP_RS08530	NA	WP_003876660.1	hypothetical protein
MAP_RS08535	MAP1679c	WP_003876661.1	DUF1345 domain-containing protein
MAP_RS08540	MAP1680c	WP_010949310.1	cutinase family protein
MAP_RS08545	MAP1681c	WP_003876663.1	enoyl-CoA hydratase/isomerase family protein
MAP_RS08550	MAP1682c	WP_003876664.1	hypothetical protein
MAP_RS08555	MAP1683c	WP_003877976.1	GGDEF domain-containing protein
MAP_RS08560	MAP1684	WP_003877977.1	inference=COORDINATES: similar to AA sequence:RefSeq:WP_003877977.1
MAP_RS08565	MAP1685	WP_003877978.1	hypothetical protein
MAP_RS08570	MAP1686	WP_003876668.1	hypothetical protein
MAP_RS22335	NA	WP_003876669.1	hypothetical protein
MAP_RS08575	NA	NA	gene=zwf
MAP_RS08580	NA	WP_003876673.1	class I SAM-dependent methyltransferase
MAP_RS08585	MAP1688	NA	inference=COORDINATES: similar to AA sequence:RefSeq:WP_003877980.1
MAP_RS08590	MAP1689	WP_003876675.1	osmoprotectant NAGGN system M42 family peptidase
MAP_RS08595	MAP1690c	WP_010949316.1	SAM-dependent methyltransferase
MAP_RS08600	MAP1691c	WP_003876677.1	hypothetical protein
MAP_RS08605	MAP1692	WP_003876678.1	KR domain-containing protein
MAP_RS08610	MAP1693c	WP_003877981.1	FKBP-type peptidyl-prolyl cis-trans isomerase
MAP_RS08615	MAP1694	WP_003877982.1	PapA2
MAP_RS08620	MAP1695c	WP_003876681.1	molecular chaperone DnaJ
MAP_RS08625	MAP1696c	NA	inference=COORDINATES: similar to AA sequence:RefSeq:WP_009976824.1
MAP_RS08630	MAP1697	WP_003876683.1	MerR family DNA-binding transcriptional regulator
MAP_RS08635	MAP1698c	WP_016706318.1	hypothetical protein
MAP_RS08640	MAP1699	WP_003877986.1	inference=COORDINATES: similar to AA sequence:RefSeq:WP_011724997.1
MAP_RS08645	MAP1700c	WP_003876686.1	hydrolase
MAP_RS08650	MAP1701c	WP_003876687.1	inference=COORDINATES: similar to AA sequence:RefSeq:WP_003876687.1
MAP_RS08655	NA	WP_015632646.1	DUF899 domain-containing protein
MAP_RS08660	NA	WP_003876689.1	hypothetical protein
MAP_RS08665	MAP1703c	WP_003877991.1	DUF732 domain-containing protein
MAP_RS08670	MAP1704c	WP_003876691.1	glyoxalase
MAP_RS08675	MAP1705c	NA	inference=COORDINATES: similar to AA sequence:RefSeq:WP_011724991.1
MAP_RS08680	MAP1706	WP_003876693.1	hypothetical protein
MAP_RS08685	MAP1707	WP_003876694.1	KR domain-containing protein
MAP_RS08690	MAP1708	WP_003877995.1	HD domain-containing protein
MAP_RS08695	MAP1709c	WP_010949323.1	long-chain fatty acid--CoA ligase
MAP_RS08700	MAP1710	WP_010949324.1	alpha/beta hydrolase
MAP_RS08705	MAP1711c	WP_003877996.1	TetR/AcrR family transcriptional regulator
MAP_RS08710	MAP1712	NA	inference=COORDINATES: similar to AA sequence:RefSeq:WP_011724987.1
MAP_RS08715	MAP1713	WP_003876700.1	acyl-CoA dehydrogenase
MAP_RS08720	MAP1714	WP_003877998.1	acetyl-CoA acetyltransferase
MAP_RS08725	MAP1715	WP_010949325.1	3-hydroxyacyl-CoA dehydrogenase
MAP_RS08730	MAP1716	WP_003876703.1	NAD(P)-dependent oxidoreductase
MAP_RS08735	MAP1717	WP_003876704.1	hypothetical protein
MAP_RS08740	MAP1718c	WP_003876705.1	DUF1942 domain-containing protein
MAP_RS08745	MAP1719c	WP_003878000.1	TetR/AcrR family transcriptional regulator
MAP_RS08750	MAP1720	WP_003876707.1	3-beta hydroxysteroid dehydrogenase
MAP_RS08755	NA	WP_003876708.1	hypothetical protein
MAP_RS22660	NA	NA	inference=COORDINATES: similar to AA sequence:RefSeq:WP_019510387.1
MAP_RS08760	MAP1721c	WP_080505408.1	TetR/AcrR family transcriptional regulator
MAP_RS08765	MAP1722	WP_010948702.1	IS110 family transposase
MAP_RS08770	MAP1723	WP_003876712.1	NADP oxidoreductase
MAP_RS08775	MAP1724c	WP_010949330.1	cytochrome b561
MAP_RS08780	MAP1725c	WP_010949331.1	catalase
MAP_RS08785	MAP1726c	NA	inference=COORDINATES: similar to AA sequence:RefSeq:WP_009976783.1
MAP_RS08790	MAP1727	WP_010949333.1	alpha/beta hydrolase
MAP_RS08795	MAP1728c	WP_019305794.1	haloacid dehalogenase type II
MAP_RS08800	NA	WP_015632645.1	hypothetical protein
MAP_RS08805	MAP1729c	WP_010949334.1	acyl-CoA thioesterase II
MAP_RS08810	MAP1730c	WP_003878009.1	GTP-binding protein
MAP_RS08815	MAP1732c	WP_003878011.1	TetR/AcrR family transcriptional regulator
MAP_RS08820	MAP1733	WP_003878012.1	hypothetical protein
MAP_RS08825	MAP1734	NA	inference=COORDINATES: similar to AA sequence:RefSeq:WP_009976778.1
MAP_RS08830	MAP1735	WP_010949339.1	alpha/beta hydrolase
MAP_RS08835	MAP1736	WP_010949340.1	TetR family transcriptional regulator
MAP_RS08840	MAP1737	WP_003878017.1	membrane protein
MAP_RS08845	MAP1738	WP_010949341.1	MMPL family transporter
MAP_RS08850	MAP1739c	WP_003878018.1	3-oxoacyl-ACP reductase
MAP_RS08855	MAP1740c	WP_003878019.1	PAS domain S-box protein
MAP_RS08860	MAP1741c	WP_003878020.1	universal stress protein
MAP_RS08865	MAP1742c	WP_003878021.1	universal stress protein
MAP_RS08870	MAP1743c	WP_010949343.1	NAD(P)H nitroreductase
MAP_RS08875	MAP1744	WP_003878022.1	hypothetical protein
MAP_RS08880	MAP1745c	WP_003878023.1	STAS/SEC14 domain-containing protein
MAP_RS08885	MAP1746c	WP_003878024.1	hypothetical protein
MAP_RS08890	MAP1747c	WP_010949346.1	hypothetical protein
MAP_RS08895	MAP1748c	WP_003876720.1	acyl-CoA dehydrogenase
MAP_RS08900	MAP1749	WP_003878026.1	thioesterase family protein
MAP_RS08905	MAP1750	WP_003876722.1	nuclear transport factor 2 family protein
MAP_RS08910	MAP1751	NA	inference=COORDINATES: similar to AA sequence:RefSeq:WP_003876723.1
MAP_RS08915	MAP1752c	WP_003878027.1	aldo/keto reductase
MAP_RS08920	MAP1753	WP_003876725.1	acyltransferase
MAP_RS08925	MAP1754c	WP_003876726.1	universal stress protein
MAP_RS08930	MAP1755c	WP_010949348.1	formate/nitrite transporter family protein
MAP_RS08935	MAP1756c	WP_003876728.1	hypothetical protein
MAP_RS08940	MAP1757c	WP_003876729.1	DNA-directed RNA polymerase sigma-70 factor
MAP_RS08945	MAP1758c	WP_003876730.1	acyl-CoA dehydrogenase
MAP_RS08950	MAP1759c	WP_003876731.1	OsmC family peroxiredoxin
MAP_RS08955	MAP1760c	WP_023867598.1	deferrochelatase/peroxidase EfeB
MAP_RS08960	MAP1761c	WP_033706820.1	EfeM/EfeO family lipoprotein
MAP_RS08965	MAP1762c	WP_003876735.1	Fe2+/Pb2+ permease
MAP_RS08970	MAP1763c	WP_003878031.1	DUF3097 domain-containing protein
MAP_RS08975	MAP1764	WP_003876737.1	DUF3349 domain-containing protein
MAP_RS08980	MAP1765c	WP_003876738.1	membrane protein
MAP_RS08985	MAP1766c	WP_003878032.1	sn-glycerol-3-phosphate ABC transporter ATP-binding protein UgpC
MAP_RS08990	MAP1767c	WP_003876741.1	carbohydrate ABC transporter permease
MAP_RS08995	MAP1768c	WP_003878033.1	sugar ABC transporter permease
MAP_RS09000	MAP1769c	WP_003876743.1	sugar ABC transporter substrate-binding protein
MAP_RS09005	MAP1770c	WP_010949351.1	RNA polymerase subunit sigma
MAP_RS09010	MAP1771c	WP_010948702.1	IS110 family transposase
MAP_RS09015	MAP1772	WP_003878038.1	hypothetical protein
MAP_RS09020	MAP1773c	WP_003876746.1	NTF2 domain-containing protein
MAP_RS09025	MAP1774c	WP_003876747.1	amidase
MAP_RS09030	MAP1775	WP_010949354.1	DoxX family membrane protein
MAP_RS09035	MAP1776c	WP_003876749.1	ATPase
MAP_RS09040	MAP1777c	WP_003878042.1	hypothetical protein
MAP_RS09045	MAP1778c	WP_010949355.1	gluconate kinase
MAP_RS09050	MAP1779c	WP_003876752.1	DUF1679 domain-containing protein
MAP_RS09055	MAP1780c	WP_015632643.1	carboxylesterase/lipase family protein
MAP_RS09060	MAP1781	WP_003876754.1	hypothetical protein
MAP_RS09065	MAP1782c	WP_003876755.1	cytochrome P450
MAP_RS09070	MAP1783	WP_003876756.1	TetR/AcrR family transcriptional regulator
MAP_RS09075	MAP1784c	WP_003878044.1	hypothetical protein
MAP_RS09080	MAP1785	WP_010948702.1	IS110 family transposase
MAP_RS09085	MAP1786c	WP_003876758.1	dihydrodipicolinate reductase
MAP_RS09090	MAP1787c	NA	inference=COORDINATES: similar to AA sequence:RefSeq:WP_014211095.1
MAP_RS09095	MAP1788	WP_003876760.1	transcriptional regulator
MAP_RS09100	MAP1789	WP_003876761.1	hypothetical protein
MAP_RS09105	MAP1790	WP_003876763.1	hypothetical protein
MAP_RS09110	MAP1791	WP_003876764.1	CbbQ/NirQ/NorQ/GpvN family protein
MAP_RS09120	MAP1792	WP_019306767.1	hypothetical protein
MAP_RS09125	MAP1793c	WP_010948702.1	IS110 family transposase
MAP_RS09130	MAP1794	WP_003876767.1	hypothetical protein
MAP_RS09135	MAP1795c	WP_003876768.1	hypothetical protein
MAP_RS09140	MAP1796c	WP_010949361.1	KR domain-containing protein
MAP_RS09145	MAP1797c	WP_003878051.1	hypothetical protein
MAP_RS09150	MAP1798	WP_003872122.1	RNA polymerase-binding protein RbpA
MAP_RS09155	MAP1799c	WP_003872123.1	polyprenol monophosphomannose synthase
MAP_RS09160	MAP1800c	WP_003878052.1	inference=COORDINATES: similar to AA sequence:RefSeq:WP_003878052.1
MAP_RS09165	MAP1801c	WP_003872125.1	amidohydrolase
MAP_RS09170	MAP1802c	WP_003872126.1	membrane protein FxsA
MAP_RS09175	MAP1803	WP_003872127.1	dienelactone hydrolase family protein
MAP_RS09180	MAP1804c	WP_003878054.1	PPOX class F420-dependent oxidoreductase
MAP_RS09185	MAP1805c	WP_003878055.1	cobaltochelatase subunit CobN
MAP_RS09190	MAP1806c	WP_003872131.1	alpha/beta hydrolase
MAP_RS09195	MAP1807c	WP_003872132.1	aliphatic sulfonate ABC transporter substrate-binding protein
MAP_RS09200	MAP1808c	WP_003872133.1	aliphatic sulfonate ABC transporter ATP-binding protein
MAP_RS09205	MAP1809c	WP_085978446.1	ABC transporter permease
MAP_RS09210	MAP1810	WP_003878056.1	inference=COORDINATES: similar to AA sequence:RefSeq:WP_008256359.1
MAP_RS09215	MAP1811	WP_003872136.1	precorrin-8X methylmutase
MAP_RS09220	MAP1812	WP_003872137.1	precorrin-2 C(20)-methyltransferase
MAP_RS09225	MAP1813c	WP_003872138.1	PPE family protein
MAP_RS09230	MAP1814	WP_073578894.1	DUF2275 domain-containing protein
MAP_RS09235	MAP1815c	WP_003872140.1	cobalt-precorrin-6A reductase
MAP_RS09240	MAP1816c	WP_003872141.1	inference=COORDINATES: similar to AA sequence:RefSeq:WP_008256346.1
MAP_RS09245	MAP1817c	WP_003872142.1	bifunctional cobalt-precorrin-7 (C(5))-methyltransferase/cobalt-precorrin-6B (C(15))-methyltransferase
MAP_RS09250	MAP1819c	NA	inference=COORDINATES: similar to AA sequence:RefSeq:NP_216589.1
MAP_RS09255	MAP1820	WP_003878063.1	F420-dependent biliverdin reductase
MAP_RS22665	MAP1821c	WP_010949365.1	hypothetical protein
MAP_RS22670	MAP1822c	WP_010949366.1	DUF4237 domain-containing protein
MAP_RS09265	MAP1823c	WP_010949367.1	aminopeptidase P family protein
MAP_RS09270	MAP1824c	WP_010949368.1	IS30 family transposase
MAP_RS09275	MAP1825	WP_003878070.1	5'-3' exonuclease
MAP_RS09280	MAP1826c	WP_003872152.1	DUF4333 domain-containing protein
MAP_RS09290	MAP1828c	NA	inference=COORDINATES: similar to AA sequence:RefSeq:WP_009976639.1
MAP_RS09295	MAP1829c	WP_003878075.1	inference=COORDINATES: similar to AA sequence:RefSeq:WP_003878075.1
MAP_RS09300	MAP1830c	WP_003878076.1	gene=tatA
MAP_RS09305	MAP1831c	WP_003872157.1	YafY family transcriptional regulator
MAP_RS09310	MAP1832c	WP_003878077.1	YafY family transcriptional regulator
MAP_RS09315	MAP1833c	WP_003878078.1	inference=COORDINATES: similar to AA sequence:RefSeq:NP_216613.1
MAP_RS09320	MAP1834c	WP_003878079.1	inference=COORDINATES: similar to AA sequence:RefSeq:WP_003878079.1
MAP_RS09325	MAP1835c	WP_003872162.1	inference=COORDINATES: similar to AA sequence:RefSeq:NP_216626.1
MAP_RS09330	MAP1836c	WP_003872163.1	prokaryotic ubiquitin-like protein Pup
MAP_RS09335	MAP1837c	WP_003878080.1	proteasome accessory factor PafA2
MAP_RS09340	MAP1838	WP_003872165.1	hypothetical protein
MAP_RS09345	NA	WP_003872166.1	inference=COORDINATES: similar to AA sequence:RefSeq:NP_216631.1
MAP_RS09350	MAP1840	WP_010949373.1	hypothetical protein
MAP_RS09355	MAP1841	WP_003872168.1	DUF503 domain-containing protein
MAP_RS09360	MAP1842c	WP_003872169.1	tRNA (adenine-N1)-methyltransferase
MAP_RS09365	MAP1843	WP_010949374.1	RecB family exonuclease
MAP_RS09370	MAP1844c	WP_003878084.1	inference=COORDINATES: similar to AA sequence:RefSeq:WP_003872171.1
MAP_RS09375	MAP1845c	WP_003872172.1	hypothetical protein
MAP_RS09380	MAP1846c	WP_003872173.1	ATP phosphoribosyltransferase
MAP_RS09385	MAP1847c	WP_010949376.1	phosphoribosyl-ATP pyrophosphatase
MAP_RS09390	MAP1848c	WP_003872175.1	TetR family transcriptional regulator
MAP_RS09395	MAP1849	WP_003872176.1	ABC transporter permease
MAP_RS09400	MAP1850	WP_031347897.1	ABC transporter permease
MAP_RS09405	MAP1851	WP_003872178.1	MCE family protein
MAP_RS09410	MAP1852	WP_003872179.1	MCE family protein
MAP_RS09415	MAP1853	WP_029245094.1	MCE family protein
MAP_RS09420	MAP1854	WP_010949379.1	MCE family protein
MAP_RS09425	MAP1855	WP_003872182.1	MCE family protein
MAP_RS09430	MAP1856	WP_010949380.1	MCE family protein
MAP_RS09435	MAP1857	WP_003878094.1	hypothetical protein
MAP_RS09440	MAP1858	WP_003872185.1	DUF3298 domain-containing protein
MAP_RS09445	MAP1859c	WP_010949381.1	methionine synthase
MAP_RS09450	MAP1860	WP_003878095.1	PAC2 family protein
MAP_RS09455	MAP1861c	WP_003878096.1	NAD(P)-dependent oxidoreductase
MAP_RS09460	NA	NA	inference=COORDINATES: similar to AA sequence:RefSeq:WP_003872190.1
MAP_RS09465	MAP1864c	WP_003872191.1	siderophore-interacting protein
MAP_RS09470	MAP1865c	WP_003872192.1	hemophore-related protein
MAP_RS09475	MAP1866c	WP_003878098.1	cytochrome P450
MAP_RS09480	MAP1867c	NA	inference=COORDINATES: similar to AA sequence:RefSeq:WP_009976595.1
MAP_RS09485	MAP1868c	WP_003872195.1	MFS transporter
MAP_RS09490	MAP1869c	WP_073579000.1	hypothetical protein
MAP_RS09495	MAP1870c	NA	inference=COORDINATES: similar to AA sequence:RefSeq:WP_015632640.1
MAP_RS09500	MAP1872c	WP_003872197.1	MbtH family protein
MAP_RS09505	MAP1873c	WP_010949392.1	thiamine pyrophosphate-binding protein
MAP_RS09510	MAP1874c	WP_019306675.1	LuxR family transcriptional regulator
MAP_RS09515	MAP1875c	WP_010949393.1	LuxR family transcriptional regulator
MAP_RS09520	MAP1876c	WP_010949394.1	L-cysteine:1D-myo-inositol 2-amino-2-deoxy-alpha-D-glucopyranoside ligase
MAP_RS09525	MAP1877c	WP_023877517.1	3'(2')%2C5'-bisphosphate nucleotidase CysQ
MAP_RS09530	MAP1878c	WP_003878103.1	phosphatidylinositol kinase
MAP_RS09535	MAP1879c	WP_003872205.1	DUF3090 domain-containing protein
MAP_RS09540	MAP1880c	WP_003872206.1	phosphoglycerate mutase
MAP_RS09545	NA	WP_003872207.1	hypothetical protein
MAP_RS09550	MAP1881	WP_085979726.1	hypothetical protein
MAP_RS09555	MAP1882	WP_003872209.1	hypothetical protein
MAP_RS09560	MAP1883	WP_003878105.1	quinone-dependent dihydroorotate dehydrogenase
MAP_RS09565	MAP1884c	WP_010949396.1	HNH endonuclease
MAP_RS09570	MAP1885c	WP_003872213.1	YbhB/YbcL family Raf kinase inhibitor-like protein
MAP_RS09575	MAP1886c	WP_003878107.1	hypothetical protein
MAP_RS09585	NA	WP_003872215.1	crotonobetainyl-CoA--carnitine CoA-transferase
MAP_RS09590	MAP1887	WP_003872216.1	phosphoribosyltransferase
MAP_RS09595	MAP1888c	WP_003878109.1	hypothetical protein
MAP_RS09600	MAP1889c	WP_003872218.1	DivIVA domain-containing protein
MAP_RS09605	MAP1890c	WP_010949399.1	YggT family protein
MAP_RS09610	MAP1891c	WP_003878111.1	cell division protein SepF
MAP_RS09615	MAP1892c	WP_003878112.1	YggS family pyridoxal phosphate-dependent enzyme
MAP_RS09620	MAP1893c	WP_003872222.1	peptidoglycan editing factor PgeF
MAP_RS09625	MAP1894c	WP_003872223.1	cell division protein FtsZ
MAP_RS23160	NA	WP_085978447.1	hypothetical protein
MAP_RS09630	MAP1895c	WP_003872224.1	cell division protein FtsQ
MAP_RS09635	MAP1896c	WP_010949402.1	UDP-N-acetylmuramate--L-alanine ligase
MAP_RS09640	MAP1897c	WP_003878116.1	inference=COORDINATES: similar to AA sequence:RefSeq:NP_301697.1
MAP_RS09645	MAP1898c	WP_003872227.1	inference=COORDINATES: similar to AA sequence:RefSeq:WP_008256142.1
MAP_RS09650	MAP1899c	WP_010949403.1	UDP-N-acetylmuramoyl-L-alanine--D-glutamate ligase
MAP_RS09655	MAP1900c	WP_010949404.1	phospho-N-acetylmuramoyl-pentapeptide-transferase
MAP_RS09660	MAP1901c	WP_003878119.1	UDP-N-acetylmuramoyl-tripeptide--D-alanyl-D-alanine ligase
MAP_RS09665	MAP1902c	WP_003872231.1	UDP-N-acetylmuramoyl-L-alanyl-D-glutamate--2%2C6-diaminopimelate ligase
MAP_RS09670	MAP1903c	WP_010949405.1	penicillin-binding protein 2
MAP_RS09675	MAP1904c	WP_040963255.1	hypothetical protein
MAP_RS09680	MAP1905c	WP_085978448.1	inference=COORDINATES: similar to AA sequence:RefSeq:NP_301689.1
MAP_RS09685	MAP1906c	WP_003872235.1	division/cell wall cluster transcriptional repressor MraZ
MAP_RS09690	MAP1907c	WP_003878123.1	DUF3040 domain-containing protein
MAP_RS09695	MAP1908	WP_003878124.1	N-acetyltransferase
MAP_RS09700	MAP1909	WP_003872238.1	DUF3153 domain-containing protein
MAP_RS09705	MAP1910c	WP_003872239.1	hypothetical protein
MAP_RS09710	MAP1911	WP_003878125.1	polyprenyl synthetase family protein
MAP_RS09715	MAP1912	WP_003872241.1	alpha-(1->6)-mannopyranosyltransferase A
MAP_RS09720	MAP1913c	WP_003878126.1	DNA-binding protein
MAP_RS09725	MAP1914	WP_003878127.1	serine/threonine protein kinase
MAP_RS09730	MAP1915	WP_010949410.1	hypothetical protein
MAP_RS09735	MAP1916c	WP_003872245.1	3-deoxy-7-phosphoheptulonate synthase class II
MAP_RS09740	MAP1917c	WP_003872246.1	hypothetical protein
MAP_RS09745	MAP1918c	NA	inference=COORDINATES: similar to AA sequence:RefSeq:WP_008256101.1
MAP_RS09750	MAP1919	WP_010949412.1	DUF2029 domain-containing protein
MAP_RS09755	MAP1920c	WP_003878132.1	1-acyl-sn-glycerol-3-phosphate acyltransferase
MAP_RS09760	MAP1921c	WP_003872251.1	hypothetical protein
MAP_RS09765	MAP1922c	WP_085978848.1	hypothetical protein
MAP_RS09770	MAP1923c	WP_003878134.1	cyclase
MAP_RS09775	MAP1924c	WP_003872254.1	hypothetical protein
MAP_RS09780	MAP1925	WP_003878135.1	long-chain fatty acid--CoA ligase
MAP_RS09785	MAP1926c	WP_003872256.1	glycosyltransferase family 1 protein
MAP_RS09790	MAP1927c	WP_003878136.1	hypothetical protein
MAP_RS09795	MAP1928c	WP_010949414.1	NlpC/P60 family protein
MAP_RS22675	MAP1929c	WP_019306397.1	hypothetical protein
MAP_RS09800	MAP1930	WP_010949416.1	inference=COORDINATES: similar to AA sequence:RefSeq:WP_020729415.1
MAP_RS22680	MAP1931c	WP_085979041.1	inference=COORDINATES: protein motif:HMM:TIGR01245
MAP_RS09815	MAP1932	WP_003878139.1	cytochrome c oxidase subunit 3
MAP_RS09820	MAP1933	WP_003872263.1	cytochrome c
MAP_RS09825	MAP1934	WP_010949419.1	menaquinol-cytochrome C reductase iron-sulfur subunit
MAP_RS09830	MAP1935	WP_009976519.1	cytochrome bc complex cytochrome b subunit
MAP_RS09835	MAP1936c	WP_011724710.1	hypothetical protein
MAP_RS09840	MAP1937c	WP_003872267.1	DUF2561 domain-containing protein
MAP_RS09845	MAP1938c	WP_010949421.1	membrane protein
MAP_RS09850	MAP1939c	WP_003872269.1	cytochrome c oxidase polypeptide 4
MAP_RS09855	MAP1940c	WP_003872270.1	cytochrome c oxidase subunit 2
MAP_RS09860	MAP1941	WP_003872271.1	inference=COORDINATES: similar to AA sequence:RefSeq:NP_216717.1
MAP_RS09865	MAP1942c	WP_003878145.1	carbohydrate kinase family protein
MAP_RS09870	MAP1943	WP_003872273.1	hypothetical protein
[truncated: 2,512 more rows]
