# Supplementary material for: Genetic Diversity Among Mycobacterium avium Subspecies Revealed by Analysis of Complete Genome Sequences
Source: Front Microbiol. 2020 Aug 7;11:1701. doi: 10.3389/fmicb.2020.01701 (PMC7426613; doi:10.3389/fmicb.2020.01701)
Supplement: TABLE S3 — Pseudogenes in Map K-10. A total of 199 pseudogenes are listed along with their start and stop coordinates on the K-10 RefSeq annotation. The old locus tag is listed if applicable. [file Table_3.XLSX]

## Sheet: Sheet1
Supplemental table S3. Pseudogenes in Map K-10
Locus tag	Gene	Type	Start	Stop	ID		Old Locus Tag
MAP_RS00095		pseudogene	18549	19831	ID=gene18	Dbxref=GeneID:22940226
MAP_RS22360		pseudogene	34618	34938	ID=gene32	Dbxref=GeneID:31477748
MAP_RS22380		pseudogene	103696	104644	ID=gene101	Dbxref=GeneID:31477752
MAP_RS00510		pseudogene	107022	108159	ID=gene105	Dbxref=GeneID:22940233
MAP_RS00630		pseudogene	131121	132796	ID=gene131	Dbxref=GeneID:22940237
MAP_RS00720		pseudogene	147906	149123	ID=gene149	Dbxref=GeneID:2721652	MAP0142c
MAP_RS00755		pseudogene	153107	154324	ID=gene155	Dbxref=GeneID:2718104	MAP0149c
MAP_RS00765		pseudogene	155589	156235	ID=gene157	Dbxref=GeneID:22940238	MAP0151c
MAP_RS00835	eccE	pseudogene	168852	170439	ID=gene171	Dbxref=GeneID:2718205	MAP0166
MAP_RS23130		pseudogene	214832	214972	ID=gene216	Dbxref=GeneID:32802761
MAP_RS22415		pseudogene	275180	275664	ID=gene265	Dbxref=GeneID:31477759
MAP_RS01375		pseudogene	290483	290833	ID=gene282	Dbxref=GeneID:22940243
MAP_RS01385		pseudogene	291881	292974	ID=gene284	Dbxref=GeneID:22940244	MAP0273
MAP_RS01455		pseudogene	305208	306417	ID=gene300	Dbxref=GeneID:22940247	MAP0287
MAP_RS22430		pseudogene	320282	320485	ID=gene312	Dbxref=GeneID:31477762
MAP_RS22435		pseudogene	336620	336854	ID=gene328	Dbxref=GeneID:31477763
MAP_RS23140		pseudogene	336749	336961	ID=gene329	Dbxref=GeneID:32802763
MAP_RS22445		pseudogene	361494	363042	ID=gene356	Dbxref=GeneID:31477765	MAP0338c
MAP_RS22450		pseudogene	377133	377318	ID=gene372	Dbxref=GeneID:31477766
MAP_RS22460		pseudogene	400242	401113	ID=gene396	Dbxref=GeneID:31477768	MAP0374c
MAP_RS01915		pseudogene	403363	403928	ID=gene398	Dbxref=GeneID:2718192	MAP0376c
MAP_RS22465		pseudogene	438198	438509	ID=gene438	Dbxref=GeneID:31477769
MAP_RS02265		pseudogene	469044	470305	ID=gene469	Dbxref=GeneID:2720385	MAP0442
MAP_RS02470		pseudogene	509092	511724	ID=gene510	Dbxref=GeneID:22940257
MAP_RS02585		pseudogene	533592	534979	ID=gene533	Dbxref=GeneID:2720348	MAP0506c
MAP_RS02840		pseudogene	582549	583646	ID=gene585	Dbxref=GeneID:22940260	MAP0558c
MAP_RS02895		pseudogene	593991	595713	ID=gene596	Dbxref=GeneID:2720763	MAP0569
MAP_RS22475		pseudogene	683453	683676	ID=gene691	Dbxref=GeneID:31477771
MAP_RS03660		pseudogene	740187	741301	ID=gene753	Dbxref=GeneID:2720115	MAP0716c
MAP_RS03850		pseudogene	774704	776067	ID=gene792	Dbxref=GeneID:2721702	MAP0752c
MAP_RS03900		pseudogene	785565	786991	ID=gene802	Dbxref=GeneID:22940271
MAP_RS04125		pseudogene	826309	827296	ID=gene847	Dbxref=GeneID:22940275
MAP_RS04150		pseudogene	831463	832394	ID=gene852	Dbxref=GeneID:2720007	MAP0813c
MAP_RS04250		pseudogene	850554	851892	ID=gene872	Dbxref=GeneID:2717922	MAP0833c
MAP_RS22530		pseudogene	884844	885038	ID=gene904	Dbxref=GeneID:31477782
MAP_RS04490		pseudogene	912413	913560	ID=gene929	Dbxref=GeneID:2720291	MAP0886c
MAP_RS22560		pseudogene	950640	950844	ID=gene961	Dbxref=GeneID:31477788
MAP_RS22565		pseudogene	1015195	1015440	ID=gene1022	Dbxref=GeneID:31477789
MAP_RS05060	kdpB	pseudogene	1039348	1041499	ID=gene1045	Dbxref=GeneID:22940290	MAP0999c
MAP_RS22570		pseudogene	1048033	1048925	ID=gene1054	Dbxref=GeneID:31477790
MAP_RS05200		pseudogene	1065879	1067095	ID=gene1072	Dbxref=GeneID:22940298	MAP1021c
MAP_RS22575		pseudogene	1103918	1104010	ID=gene1105	Dbxref=GeneID:31477791
MAP_RS05425		pseudogene	1115853	1116777	ID=gene1119	Dbxref=GeneID:22940302
MAP_RS05485		pseudogene	1127885	1128508	ID=gene1131	Dbxref=GeneID:22940306
MAP_RS05545		pseudogene	1141173	1142135	ID=gene1143	Dbxref=GeneID:22940307
MAP_RS05645		pseudogene	1159025	1160412	ID=gene1163	Dbxref=GeneID:22940309	MAP1108
MAP_RS06145		pseudogene	1269443	1270281	ID=gene1264	Dbxref=GeneID:22940312
MAP_RS06170		pseudogene	1274039	1274475	ID=gene1269	Dbxref=GeneID:2718965	MAP1213
MAP_RS06365		pseudogene	1333854	1334871	ID=gene1312	Dbxref=GeneID:2719832	MAP1254
MAP_RS06425		pseudogene	1348286	1348952	ID=gene1325	Dbxref=GeneID:2720917	MAP1266c
MAP_RS06485		pseudogene	1364613	1366031	ID=gene1337	Dbxref=GeneID:22940318	MAP1278c
MAP_RS06620		pseudogene	1392059	1392561	ID=gene1364	Dbxref=GeneID:22940320	MAP1304
MAP_RS06665	cydC	pseudogene	1401301	1403080	ID=gene1373	Dbxref=GeneID:2719988	MAP1313c
MAP_RS06790		pseudogene	1432491	1433564	ID=gene1398	Dbxref=GeneID:2721360	MAP1336
MAP_RS22615		pseudogene	1436050	1436238	ID=gene1401	Dbxref=GeneID:31477799
MAP_RS06840		pseudogene	1443852	1445701	ID=gene1409	Dbxref=GeneID:22940323
MAP_RS06895		pseudogene	1457982	1458888	ID=gene1420	Dbxref=GeneID:2719907	MAP1357
MAP_RS06960		pseudogene	1473275	1479650	ID=gene1433	Dbxref=GeneID:2720330	MAP1370
MAP_RS06985		pseudogene	1487360	1488050	ID=gene1438	Dbxref=GeneID:22940325
MAP_RS07000		pseudogene	1490245	1491128	ID=gene1441	Dbxref=GeneID:22940326	MAP1378
MAP_RS07305		pseudogene	1570719	1571793	ID=gene1502	Dbxref=GeneID:2718129	MAP1437c
MAP_RS07360	bphC	pseudogene	1581631	1582541	ID=gene1513	Dbxref=GeneID:22940331
MAP_RS22620		pseudogene	1589873	1590296	ID=gene1520	Dbxref=GeneID:31477800
MAP_RS07410		pseudogene	1593150	1595737	ID=gene1524	Dbxref=GeneID:2717892	MAP1457
MAP_RS07560		pseudogene	1626334	1627856	ID=gene1553	Dbxref=GeneID:2721585	MAP1485c
MAP_RS07590		pseudogene	1632173	1633404	ID=gene1559	Dbxref=GeneID:22940337	MAP1490
MAP_RS07650		pseudogene	1649535	1650699	ID=gene1571	Dbxref=GeneID:2718553	MAP1503c
MAP_RS07810		pseudogene	1682950	1684592	ID=gene1603	Dbxref=GeneID:22940342
MAP_RS07900		pseudogene	1705820	1706450	ID=gene1621	Dbxref=GeneID:22940343
MAP_RS08235		pseudogene	1774336	1776289	ID=gene1689	Dbxref=GeneID:2721672	MAP1620
MAP_RS22635		pseudogene	1785143	1785286	ID=gene1700	Dbxref=GeneID:31477803
MAP_RS22650		pseudogene	1798248	1798496	ID=gene1715	Dbxref=GeneID:31477806
MAP_RS08515		pseudogene	1830598	1831983	ID=gene1748	Dbxref=GeneID:22940348	MAP1676
MAP_RS08575	zwf	pseudogene	1845592	1847158	ID=gene1761	Dbxref=GeneID:22940350
MAP_RS08585		pseudogene	1848226	1849108	ID=gene1763	Dbxref=GeneID:22940352	MAP1688
MAP_RS08625		pseudogene	1856263	1856684	ID=gene1771	Dbxref=GeneID:2721753	MAP1696c
MAP_RS08675		pseudogene	1863575	1864418	ID=gene1781	Dbxref=GeneID:2719875	MAP1705c
MAP_RS08710		pseudogene	1870265	1871082	ID=gene1788	Dbxref=GeneID:2719601	MAP1712
MAP_RS22660		pseudogene	1880389	1880723	ID=gene1798	Dbxref=GeneID:31477808
MAP_RS08785		pseudogene	1886854	1887457	ID=gene1804	Dbxref=GeneID:2718578	MAP1726c
MAP_RS08825		pseudogene	1895086	1896672	ID=gene1812	Dbxref=GeneID:22940358	MAP1734
MAP_RS08910		pseudogene	1913828	1914929	ID=gene1829	Dbxref=GeneID:2721064	MAP1751
MAP_RS09090		pseudogene	1949437	1950224	ID=gene1865	Dbxref=GeneID:2717662	MAP1787c
MAP_RS09250		pseudogene	1995811	1996559	ID=gene1896	Dbxref=GeneID:22940361	MAP1819c
MAP_RS09290		pseudogene	2005945	2008752	ID=gene1904	Dbxref=GeneID:2717866	MAP1828c
MAP_RS09460		pseudogene	2044496	2046219	ID=gene1938	Dbxref=GeneID:22940364
MAP_RS09480		pseudogene	2048668	2055035	ID=gene1942	Dbxref=GeneID:2717484	MAP1867c
MAP_RS09495		pseudogene	2057509	2063965	ID=gene1945	Dbxref=GeneID:22940365	MAP1870c
MAP_RS09745		pseudogene	2119166	2120049	ID=gene1996	Dbxref=GeneID:2719628	MAP1918c
MAP_RS10190		pseudogene	2213465	2214398	ID=gene2086	Dbxref=GeneID:22940377
MAP_RS10350		pseudogene	2245733	2246448	ID=gene2119	Dbxref=GeneID:22940379	MAP2037
MAP_RS23165		pseudogene	2285399	2285542	ID=gene2159	Dbxref=GeneID:32802768
MAP_RS10565		pseudogene	2298939	2300670	ID=gene2164	Dbxref=GeneID:2721434	MAP2081
MAP_RS10590		pseudogene	2305200	2305528	ID=gene2170	Dbxref=GeneID:2719878	MAP2085
MAP_RS10760		pseudogene	2343694	2344543	ID=gene2204	Dbxref=GeneID:22940383
MAP_RS10850		pseudogene	2363378	2365362	ID=gene2222	Dbxref=GeneID:22940384	MAP2133
MAP_RS11045		pseudogene	2401832	2406272	ID=gene2261	Dbxref=GeneID:2720488	MAP2171c
MAP_RS11050		pseudogene	2406269	2412810	ID=gene2262	Dbxref=GeneID:2720998	MAP2173c
MAP_RS11120		pseudogene	2428054	2429520	ID=gene2275	Dbxref=GeneID:2720389	MAP2187c
MAP_RS11150		pseudogene	2436105	2437270	ID=gene2281	Dbxref=GeneID:2717815	MAP2193
MAP_RS11210		pseudogene	2449627	2450124	ID=gene2293	Dbxref=GeneID:22940396	MAP2204c
MAP_RS22715		pseudogene	2454623	2454836	ID=gene2297	Dbxref=GeneID:31477819
MAP_RS11325		pseudogene	2474341	2475857	ID=gene2316	Dbxref=GeneID:22940399
MAP_RS11360		pseudogene	2493138	2496145	ID=gene2323	Dbxref=GeneID:2717529	MAP2232
MAP_RS11440		pseudogene	2511621	2513023	ID=gene2338	Dbxref=GeneID:2721055	MAP2248c
MAP_RS11670		pseudogene	2561300	2562896	ID=gene2383	Dbxref=GeneID:22940401	MAP2292
MAP_RS11685		pseudogene	2564709	2565123	ID=gene2386	Dbxref=GeneID:22940403
MAP_RS12000		pseudogene	2645469	2646964	ID=gene2450	Dbxref=GeneID:22940405
MAP_RS22735		pseudogene	2659384	2660540	ID=gene2462	Dbxref=GeneID:31477823	MAP2366
MAP_RS22740		pseudogene	2714376	2715924	ID=gene2512	Dbxref=GeneID:31477824	MAP2416c
MAP_RS22745		pseudogene	2716698	2717011	ID=gene2514	Dbxref=GeneID:31477825
MAP_RS12365		pseudogene	2721828	2722499	ID=gene2522	Dbxref=GeneID:22940412	MAP2425c
MAP_RS12510	atpD	pseudogene	2755965	2757423	ID=gene2551	Dbxref=GeneID:2719077	MAP2451c
MAP_RS12650		pseudogene	2784135	2785008	ID=gene2582	Dbxref=GeneID:22940416	MAP2480c
MAP_RS22765		pseudogene	2809800	2811348	ID=gene2605	Dbxref=GeneID:31477829	MAP2502
MAP_RS12775		pseudogene	2812865	2814678	ID=gene2607	Dbxref=GeneID:22940420	MAP2504
MAP_RS22770		pseudogene	2819591	2820748	ID=gene2613	Dbxref=GeneID:31477830
MAP_RS13055		pseudogene	2876742	2877368	ID=gene2663	Dbxref=GeneID:22940424	MAP2559
MAP_RS22775		pseudogene	2885100	2886648	ID=gene2670	Dbxref=GeneID:31477831	MAP2566
MAP_RS13130		pseudogene	2892654	2894733	ID=gene2678	Dbxref=GeneID:2720303	MAP2573
MAP_RS13240		pseudogene	2919853	2921512	ID=gene2700	Dbxref=GeneID:2718556	MAP2595
MAP_RS13285		pseudogene	2929382	2935744	ID=gene2709	Dbxref=GeneID:22940428
MAP_RS13490		pseudogene	2980911	2982394	ID=gene2752	Dbxref=GeneID:22940429	MAP2648c
MAP_RS13625		pseudogene	3011464	3011788	ID=gene2779	Dbxref=GeneID:22940432	MAP2674c
MAP_RS13845		pseudogene	3054953	3056228	ID=gene2825	Dbxref=GeneID:2720097	MAP2718c
MAP_RS14195		pseudogene	3109312	3109690	ID=gene2898	Dbxref=GeneID:22940448
MAP_RS22825		pseudogene	3115237	3116156	ID=gene2906	Dbxref=GeneID:31477841	MAP2784
MAP_RS14350		pseudogene	3137012	3138195	ID=gene2929	Dbxref=GeneID:2720341	MAP2806c
MAP_RS22830		pseudogene	3150628	3150988	ID=gene2945	Dbxref=GeneID:31477842
MAP_RS14520		pseudogene	3166711	3167870	ID=gene2963	Dbxref=GeneID:2717471	MAP2838c
MAP_RS14810		pseudogene	3224963	3225665	ID=gene3021	Dbxref=GeneID:22940460
MAP_RS14885		pseudogene	3239926	3240245	ID=gene3036	Dbxref=GeneID:2721727	MAP2908c
MAP_RS14925	cobA	pseudogene	3248074	3249290	ID=gene3044	Dbxref=GeneID:2721689	MAP2916c
MAP_RS15050		pseudogene	3276815	3277654	ID=gene3071	Dbxref=GeneID:2718126	MAP2941c
MAP_RS22850		pseudogene	3290418	3290640	ID=gene3087	Dbxref=GeneID:31477846
MAP_RS22855		pseudogene	3299955	3300285	ID=gene3097	Dbxref=GeneID:31477847
MAP_RS15625		pseudogene	3393756	3394161	ID=gene3189	Dbxref=GeneID:22940474	MAP3050c
MAP_RS15670		pseudogene	3402932	3403877	ID=gene3198	Dbxref=GeneID:22940475
MAP_RS15705		pseudogene	3410633	3411987	ID=gene3205	Dbxref=GeneID:2721246	MAP3065
MAP_RS15735		pseudogene	3417279	3418230	ID=gene3211	Dbxref=GeneID:22940476	MAP3071
MAP_RS16120		pseudogene	3496494	3497935	ID=gene3289	Dbxref=GeneID:22940485
MAP_RS16235		pseudogene	3514097	3515590	ID=gene3312	Dbxref=GeneID:22940490
MAP_RS16240		pseudogene	3515610	3516294	ID=gene3313	Dbxref=GeneID:2721527	MAP3163
MAP_RS16325		pseudogene	3530286	3532612	ID=gene3331	Dbxref=GeneID:22940492	MAP3181
MAP_RS16460		pseudogene	3556408	3558821	ID=gene3358	Dbxref=GeneID:2718624	MAP3207
MAP_RS16515		pseudogene	3568820	3570021	ID=gene3370	Dbxref=GeneID:2718744	MAP3217c
MAP_RS23175		pseudogene	3574401	3574610	ID=gene3375	Dbxref=GeneID:32802770
MAP_RS16695		pseudogene	3606545	3608034	ID=gene3406	Dbxref=GeneID:22940500	MAP3250
MAP_RS22890		pseudogene	3625877	3626188	ID=gene3421	Dbxref=GeneID:31477854
MAP_RS16955		pseudogene	3666132	3667052	ID=gene3457	Dbxref=GeneID:22940507
MAP_RS16960		pseudogene	3667064	3668132	ID=gene3458	Dbxref=GeneID:22940508
MAP_RS17180		pseudogene	3710012	3710628	ID=gene3503	Dbxref=GeneID:2717739	MAP3341
MAP_RS22900		pseudogene	3727800	3729348	ID=gene3519	Dbxref=GeneID:31477856	MAP3357c
MAP_RS17350		pseudogene	3746913	3748072	ID=gene3538	Dbxref=GeneID:2718625	MAP3374
MAP_RS17435		pseudogene	3766967	3768170	ID=gene3555	Dbxref=GeneID:2721089	MAP3391c
MAP_RS17470		pseudogene	3773500	3775052	ID=gene3562	Dbxref=GeneID:2718636	MAP3398c
MAP_RS22925		pseudogene	3852146	3853694	ID=gene3635	Dbxref=GeneID:31477861	MAP3467c
MAP_RS17875		pseudogene	3863995	3865201	ID=gene3645	Dbxref=GeneID:2719378	MAP3477
MAP_RS22945		pseudogene	3916579	3916819	ID=gene3687	Dbxref=GeneID:31477865
MAP_RS18145		pseudogene	3936349	3937183	ID=gene3703	Dbxref=GeneID:2721544	MAP3532c
MAP_RS18255		pseudogene	3954044	3955359	ID=gene3725	Dbxref=GeneID:2720633	MAP3553
MAP_RS22950		pseudogene	3968008	3968839	ID=gene3740	Dbxref=GeneID:31477866
MAP_RS18490		pseudogene	3996323	3997908	ID=gene3772	Dbxref=GeneID:2720317	MAP3601
MAP_RS18500		pseudogene	3999025	3999896	ID=gene3774	Dbxref=GeneID:2721481	MAP3603
MAP_RS18515		pseudogene	4002240	4003806	ID=gene3777	Dbxref=GeneID:2720124	MAP3606
MAP_RS18710		pseudogene	4050441	4051526	ID=gene3817	Dbxref=GeneID:22940533
MAP_RS22960		pseudogene	4054255	4054692	ID=gene3820	Dbxref=GeneID:31477868
MAP_RS18990	nirD	pseudogene	4120505	4120874	ID=gene3875	Dbxref=GeneID:2721045	MAP3703
MAP_RS23195		pseudogene	4144957	4145184	ID=gene3898	Dbxref=GeneID:32802774
MAP_RS22995		pseudogene	4192828	4193664	ID=gene3928	Dbxref=GeneID:31477875
MAP_RS19415	eccE	pseudogene	4235179	4236172	ID=gene3966	Dbxref=GeneID:22940547	MAP3788
MAP_RS19425		pseudogene	4237531	4238312	ID=gene3968	Dbxref=GeneID:22940548	MAP3790
MAP_RS19545		pseudogene	4258222	4258559	ID=gene3991	Dbxref=GeneID:22940552
MAP_RS19605		pseudogene	4271757	4273209	ID=gene4006	Dbxref=GeneID:2719435	MAP3822
MAP_RS19630		pseudogene	4278369	4278742	ID=gene4011	Dbxref=GeneID:2718974	MAP3827
MAP_RS20250		pseudogene	4409493	4409947	ID=gene4136	Dbxref=GeneID:22940560	MAP3948c
MAP_RS20290	lpdA	pseudogene	4416335	4417731	ID=gene4144	Dbxref=GeneID:2720042	MAP3956
MAP_RS23035		pseudogene	4436315	4436556	ID=gene4167	Dbxref=GeneID:31477883
MAP_RS23045		pseudogene	4456317	4456533	ID=gene4189	Dbxref=GeneID:31477885
MAP_RS23060		pseudogene	4474385	4475529	ID=gene4208	Dbxref=GeneID:31477888
MAP_RS20585		pseudogene	4475535	4476884	ID=gene4209	Dbxref=GeneID:22940564
MAP_RS20590		pseudogene	4476996	4478294	ID=gene4210	Dbxref=GeneID:22940565	MAP4014
MAP_RS20670		pseudogene	4491995	4493024	ID=gene4227	Dbxref=GeneID:22940566
MAP_RS20870		pseudogene	4534411	4535281	ID=gene4269	Dbxref=GeneID:22940569
MAP_RS20890		pseudogene	4539699	4540456	ID=gene4273	Dbxref=GeneID:22940570	MAP4073
MAP_RS23075		pseudogene	4548381	4549331	ID=gene4279	Dbxref=GeneID:31477891
MAP_RS23080		pseudogene	4549342	4550491	ID=gene4280	Dbxref=GeneID:31477892
MAP_RS20955		pseudogene	4553353	4554568	ID=gene4285	Dbxref=GeneID:2721014	MAP4084
MAP_RS20995	recB	pseudogene	4563657	4566959	ID=gene4293	Dbxref=GeneID:22940574
MAP_RS21040		pseudogene	4577273	4577969	ID=gene4302	Dbxref=GeneID:22940576
MAP_RS21270		pseudogene	4622985	4623242	ID=gene4348	Dbxref=GeneID:22940577
MAP_RS21335	mftF	pseudogene	4633925	4635344	ID=gene4361	Dbxref=GeneID:22940579
MAP_RS23085		pseudogene	4637558	4637779	ID=gene4364	Dbxref=GeneID:31477893
MAP_RS21660		pseudogene	4690934	4692023	ID=gene4428	Dbxref=GeneID:2720443	MAP4221c
MAP_RS21755	eccCb	pseudogene	4708626	4712218	ID=gene4448	Dbxref=GeneID:2718335	MAP4241
MAP_RS21795		pseudogene	4717150	4718615	ID=gene4456	Dbxref=GeneID:2720996	MAP4249
MAP_RS22070		pseudogene	4771704	4773928	ID=gene4511	Dbxref=GeneID:2718194	MAP4303c
MAP_RS22165	eccB	pseudogene	4797295	4798782	ID=gene4530	Dbxref=GeneID:22940586	MAP4323c
MAP_RS22295		pseudogene	4826629	4827181	ID=gene4557	Dbxref=GeneID:2720805	MAP4346c
