# Supplementary material for: Genetic Diversity Among Mycobacterium avium Subspecies Revealed by Analysis of Complete Genome Sequences
Source: Front Microbiol. 2020 Aug 7;11:1701. doi: 10.3389/fmicb.2020.01701 (PMC7426613; doi:10.3389/fmicb.2020.01701)
Supplement: TABLE S8 — Core genes in non-Map as determined by Roary analysis. [file Table_8.xlsx]

## Sheet: Feuil1
Supplemental table S8 : Core genome (3283 gene) of the 15 Non Map strains enrolled in this study.
104	TH135	RCAD0278	OCU464	H87	HP17	OCU901s_S2_2s	OCU873s_P7_4s	MAC109	HJW	mc2 2500	101174	101034	101115	JP-H-1
MAV_RS20310	MAH_RS17900	BBJ32_RS05060	KV38_RS19650	BS641_RS21510	BEP52_RS18970	BJP78_RS19370	BJP74_RS18660	DFS55_RS05290	DBO90_RS18475	EX350_RS03355	FCV17_RS24030	FCV16_RS16570	FCV18_RS08070	JPH1_RS20875
MAV_RS20345	MAH_RS17935	BBJ32_RS05095	KV38_RS19685	BS641_RS21545	BEP52_RS19005	BJP78_RS19405	BJP74_RS18695	DFS55_RS05255	DBO90_RS18510	EX350_RS03320	FCV17_RS24065	FCV16_RS16600	FCV18_RS08105	JPH1_RS20910
MAV_RS20400	MAH_RS17990	BBJ32_RS05155	KV38_RS19740	BS641_RS21600	BEP52_RS19060	BJP78_RS19460	BJP74_RS18750	DFS55_RS05200	DBO90_RS18570	EX350_RS03265	FCV17_RS24120	FCV16_RS16655	FCV18_RS08160	JPH1_RS20965
MAV_RS20550	MAH_RS18140	BBJ32_RS05305	KV38_RS19895	BS641_RS21755	BEP52_RS19220	BJP78_RS19620	BJP74_RS18910	DFS55_RS05045	DBO90_RS18725	EX350_RS03110	FCV17_RS24275	FCV16_RS16810	FCV18_RS08315	JPH1_RS21120
MAV_RS20665	MAH_RS18250	BBJ32_RS05415	KV38_RS20010	BS641_RS21870	BEP52_RS19485	BJP78_RS19730	BJP74_RS19120	DFS55_RS04935	DBO90_RS18835	EX350_RS02980	FCV17_RS24385	FCV16_RS16920	FCV18_RS08425	JPH1_RS21240
MAV_RS20730	MAH_RS18310	BBJ32_RS05480	KV38_RS20070	BS641_RS21930	BEP52_RS19545	BJP78_RS19790	BJP74_RS19180	DFS55_RS04875	DBO90_RS18905	EX350_RS02920	FCV17_RS24445	FCV16_RS16980	FCV18_RS08485	JPH1_RS21300
MAV_RS20850	MAH_RS18430	BBJ32_RS05600	KV38_RS20195	BS641_RS22050	BEP52_RS19665	BJP78_RS19910	BJP74_RS19300	DFS55_RS04750	DBO90_RS19025	EX350_RS02795	FCV17_RS00365	FCV16_RS17105	FCV18_RS08610	JPH1_RS21425
MAV_RS20870	MAH_RS18455	BBJ32_RS05620	KV38_RS20215	BS641_RS22070	BEP52_RS19685	BJP78_RS19935	BJP74_RS19325	DFS55_RS04730	DBO90_RS19045	EX350_RS02775	FCV17_RS00385	FCV16_RS17125	FCV18_RS08630	JPH1_RS21445
MAV_RS20955	MAH_RS18540	BBJ32_RS05705	KV38_RS20300	BS641_RS22180	BEP52_RS19770	BJP78_RS20020	BJP74_RS19410	DFS55_RS04645	DBO90_RS19130	EX350_RS02650	FCV17_RS00495	FCV16_RS17235	FCV18_RS08740	JPH1_RS21560
MAV_RS20985	MAH_RS18570	BBJ32_RS05735	KV38_RS20330	BS641_RS22210	BEP52_RS19800	BJP78_RS20050	BJP74_RS19440	DFS55_RS04615	DBO90_RS19160	EX350_RS02620	FCV17_RS00525	FCV16_RS17265	FCV18_RS08770	JPH1_RS21590
MAV_RS21000	MAH_RS18585	BBJ32_RS05750	KV38_RS20350	BS641_RS22225	BEP52_RS19820	BJP78_RS20070	BJP74_RS19460	DFS55_RS04595	DBO90_RS19175	EX350_RS02600	FCV17_RS00545	FCV16_RS17285	FCV18_RS08790	JPH1_RS21610
MAV_RS21005	MAH_RS18590	BBJ32_RS05755	KV38_RS20355	BS641_RS22230	BEP52_RS19825	BJP78_RS20075	BJP74_RS19465	DFS55_RS04590	DBO90_RS19180	EX350_RS02595	FCV17_RS00550	FCV16_RS17290	FCV18_RS08795	JPH1_RS21615
MAV_RS21030	MAH_RS18615	BBJ32_RS05780	KV38_RS20380	BS641_RS22255	BEP52_RS19850	BJP78_RS20100	BJP74_RS19490	DFS55_RS04565	DBO90_RS19205	EX350_RS02570	FCV17_RS00575	FCV16_RS17315	FCV18_RS08820	JPH1_RS21640
MAV_RS21050	MAH_RS18635	BBJ32_RS05800	KV38_RS20400	BS641_RS22275	BEP52_RS19870	BJP78_RS20120	BJP74_RS19510	DFS55_RS04545	DBO90_RS19225	EX350_RS02550	FCV17_RS00595	FCV16_RS17335	FCV18_RS08840	JPH1_RS21660
MAV_RS21125	MAH_RS18710	BBJ32_RS05875	KV38_RS20480	BS641_RS22355	BEP52_RS19950	BJP78_RS20200	BJP74_RS19590	DFS55_RS04465	DBO90_RS19305	EX350_RS02470	FCV17_RS00675	FCV16_RS17415	FCV18_RS08920	JPH1_RS21740
MAV_RS21150	MAH_RS18735	BBJ32_RS05900	KV38_RS20505	BS641_RS22380	BEP52_RS19975	BJP78_RS20225	BJP74_RS19615	DFS55_RS04440	DBO90_RS19330	EX350_RS02445	FCV17_RS00700	FCV16_RS17440	FCV18_RS08945	JPH1_RS21765
MAV_RS21155	MAH_RS18740	BBJ32_RS05905	KV38_RS20510	BS641_RS26655	BEP52_RS19980	BJP78_RS20230	BJP74_RS19620	DFS55_RS04435	DBO90_RS19335	EX350_RS02440	FCV17_RS00705	FCV16_RS17445	FCV18_RS08950	JPH1_RS21770
MAV_RS21160	MAH_RS18745	BBJ32_RS05910	KV38_RS20515	BS641_RS22390	BEP52_RS19985	BJP78_RS20235	BJP74_RS19625	DFS55_RS04430	DBO90_RS19340	EX350_RS02435	FCV17_RS00710	FCV16_RS17450	FCV18_RS08955	JPH1_RS21775
MAV_RS21230	MAH_RS18815	BBJ32_RS05980	KV38_RS20585	BS641_RS22460	BEP52_RS20055	BJP78_RS20305	BJP74_RS19695	DFS55_RS04360	DBO90_RS19410	EX350_RS02365	FCV17_RS00780	FCV16_RS17520	FCV18_RS09025	JPH1_RS21845
MAV_RS21235	MAH_RS18820	BBJ32_RS05985	KV38_RS20590	BS641_RS22465	BEP52_RS20060	BJP78_RS20310	BJP74_RS19700	DFS55_RS04355	DBO90_RS19415	EX350_RS02360	FCV17_RS00785	FCV16_RS17525	FCV18_RS09030	JPH1_RS21850
MAV_RS21435	MAH_RS19020	BBJ32_RS06185	KV38_RS20790	BS641_RS22665	BEP52_RS20260	BJP78_RS20660	BJP74_RS19900	DFS55_RS04155	DBO90_RS19615	EX350_RS02160	FCV17_RS00985	FCV16_RS17725	FCV18_RS09230	JPH1_RS22050
MAV_RS21485	MAH_RS19070	BBJ32_RS06235	KV38_RS20840	BS641_RS22715	BEP52_RS20310	BJP78_RS20710	BJP74_RS19950	DFS55_RS04105	DBO90_RS19665	EX350_RS02110	FCV17_RS01035	FCV16_RS17775	FCV18_RS09280	JPH1_RS22100
MAV_RS21615	MAH_RS19200	BBJ32_RS06365	KV38_RS20990	BS641_RS22845	BEP52_RS20440	BJP78_RS20840	BJP74_RS20080	DFS55_RS03955	DBO90_RS19795	EX350_RS01960	FCV17_RS01185	FCV16_RS17925	FCV18_RS09430	JPH1_RS22230
MAV_RS21645	MAH_RS19230	BBJ32_RS06395	KV38_RS21020	BS641_RS22875	BEP52_RS20470	BJP78_RS20870	BJP74_RS20110	DFS55_RS03925	DBO90_RS19825	EX350_RS01930	FCV17_RS01215	FCV16_RS17955	FCV18_RS09460	JPH1_RS22260
MAV_RS21665	MAH_RS19250	BBJ32_RS06415	KV38_RS21040	BS641_RS22895	BEP52_RS20490	BJP78_RS20890	BJP74_RS20130	DFS55_RS03905	DBO90_RS19845	EX350_RS01910	FCV17_RS01235	FCV16_RS17975	FCV18_RS09480	JPH1_RS22280
MAV_RS21670	MAH_RS19255	BBJ32_RS06420	KV38_RS21045	BS641_RS22900	BEP52_RS20495	BJP78_RS20895	BJP74_RS20135	DFS55_RS03900	DBO90_RS19850	EX350_RS01905	FCV17_RS01240	FCV16_RS17980	FCV18_RS09485	JPH1_RS22285
MAV_RS21700	MAH_RS19285	BBJ32_RS06450	KV38_RS21075	BS641_RS22930	BEP52_RS20525	BJP78_RS20925	BJP74_RS20165	DFS55_RS03870	DBO90_RS19880	EX350_RS01875	FCV17_RS01270	FCV16_RS18010	FCV18_RS09515	JPH1_RS22315
MAV_RS21800	MAH_RS19385	BBJ32_RS06550	KV38_RS21175	BS641_RS23030	BEP52_RS20625	BJP78_RS21025	BJP74_RS20265	DFS55_RS03770	DBO90_RS19980	EX350_RS01775	FCV17_RS01370	FCV16_RS18110	FCV18_RS09615	JPH1_RS22415
MAV_RS21815	MAH_RS19400	BBJ32_RS06565	KV38_RS21190	BS641_RS23045	BEP52_RS20640	BJP78_RS21040	BJP74_RS20280	DFS55_RS03755	DBO90_RS19995	EX350_RS01760	FCV17_RS01385	FCV16_RS18125	FCV18_RS09630	JPH1_RS22430
MAV_RS21825	MAH_RS19410	BBJ32_RS06575	KV38_RS21200	BS641_RS23055	BEP52_RS20650	BJP78_RS21050	BJP74_RS20290	DFS55_RS03745	DBO90_RS20005	EX350_RS01750	FCV17_RS01395	FCV16_RS18135	FCV18_RS09640	JPH1_RS22440
MAV_RS21875	MAH_RS19460	BBJ32_RS06625	KV38_RS21250	BS641_RS23105	BEP52_RS20700	BJP78_RS21100	BJP74_RS20340	DFS55_RS03695	DBO90_RS20055	EX350_RS01700	FCV17_RS01445	FCV16_RS18185	FCV18_RS09690	JPH1_RS22490
MAV_RS21905	MAH_RS19490	BBJ32_RS06655	KV38_RS21280	BS641_RS23135	BEP52_RS20730	BJP78_RS21130	BJP74_RS20370	DFS55_RS03665	DBO90_RS20085	EX350_RS01670	FCV17_RS01475	FCV16_RS18215	FCV18_RS09720	JPH1_RS22520
MAV_RS21920	MAH_RS19505	BBJ32_RS06670	KV38_RS21295	BS641_RS23150	BEP52_RS20745	BJP78_RS21145	BJP74_RS20385	DFS55_RS03650	DBO90_RS20100	EX350_RS01655	FCV17_RS01490	FCV16_RS18230	FCV18_RS09735	JPH1_RS22535
MAV_RS21925	MAH_RS19510	BBJ32_RS06675	KV38_RS21300	BS641_RS23155	BEP52_RS20750	BJP78_RS21150	BJP74_RS20390	DFS55_RS03645	DBO90_RS20105	EX350_RS01650	FCV17_RS01495	FCV16_RS18235	FCV18_RS09740	JPH1_RS22540
MAV_RS21990	MAH_RS19595	BBJ32_RS06740	KV38_RS21390	BS641_RS23240	BEP52_RS20845	BJP78_RS21240	BJP74_RS20480	DFS55_RS03555	DBO90_RS20170	EX350_RS01545	FCV17_RS01560	FCV16_RS18300	FCV18_RS09805	JPH1_RS22605
MAV_RS22000	MAH_RS19605	BBJ32_RS06750	KV38_RS21400	BS641_RS23250	BEP52_RS20855	BJP78_RS21250	BJP74_RS20490	DFS55_RS03545	DBO90_RS20180	EX350_RS01535	FCV17_RS01570	FCV16_RS18310	FCV18_RS09815	JPH1_RS22615
MAV_RS22120	MAH_RS19725	BBJ32_RS06870	KV38_RS21520	BS641_RS23370	BEP52_RS20975	BJP78_RS21370	BJP74_RS20610	DFS55_RS03425	DBO90_RS20300	EX350_RS01415	FCV17_RS01690	FCV16_RS18430	FCV18_RS09935	JPH1_RS22735
MAV_RS22150	MAH_RS19755	BBJ32_RS06900	KV38_RS21550	BS641_RS23400	BEP52_RS21005	BJP78_RS21400	BJP74_RS20640	DFS55_RS03395	DBO90_RS20330	EX350_RS01385	FCV17_RS01720	FCV16_RS18460	FCV18_RS09965	JPH1_RS22765
MAV_RS22200	MAH_RS19805	BBJ32_RS06950	KV38_RS21605	BS641_RS23450	BEP52_RS21060	BJP78_RS21455	BJP74_RS20695	DFS55_RS03340	DBO90_RS20385	EX350_RS01330	FCV17_RS01775	FCV16_RS18515	FCV18_RS10020	JPH1_RS22820
MAV_RS22290	MAH_RS19895	BBJ32_RS07040	KV38_RS21700	BS641_RS23545	BEP52_RS21155	BJP78_RS21550	BJP74_RS20790	DFS55_RS03245	DBO90_RS20480	EX350_RS01235	FCV17_RS01870	FCV16_RS18610	FCV18_RS10115	JPH1_RS22915
MAV_RS22295	MAH_RS19900	BBJ32_RS07045	KV38_RS21705	BS641_RS23550	BEP52_RS21160	BJP78_RS21555	BJP74_RS20795	DFS55_RS03240	DBO90_RS20485	EX350_RS01230	FCV17_RS01875	FCV16_RS18615	FCV18_RS10120	JPH1_RS22920
MAV_RS22360	MAH_RS19970	BBJ32_RS07110	KV38_RS21790	BS641_RS23655	BEP52_RS21245	BJP78_RS21640	BJP74_RS20880	DFS55_RS03160	DBO90_RS20555	EX350_RS01150	FCV17_RS01960	FCV16_RS18700	FCV18_RS10205	JPH1_RS23000
MAV_RS22405	MAH_RS20015	BBJ32_RS07155	KV38_RS21835	BS641_RS23700	BEP52_RS21290	BJP78_RS21685	BJP74_RS20925	DFS55_RS03115	DBO90_RS20600	EX350_RS01105	FCV17_RS02005	FCV16_RS18745	FCV18_RS10250	JPH1_RS23045
MAV_RS22435	MAH_RS20045	BBJ32_RS07185	KV38_RS21870	BS641_RS23735	BEP52_RS21325	BJP78_RS21720	BJP74_RS20960	DFS55_RS03080	DBO90_RS20635	EX350_RS01070	FCV17_RS02040	FCV16_RS18780	FCV18_RS10285	JPH1_RS23080
MAV_RS22440	MAH_RS20050	BBJ32_RS07190	KV38_RS21875	BS641_RS23740	BEP52_RS21330	BJP78_RS21725	BJP74_RS20965	DFS55_RS03075	DBO90_RS20640	EX350_RS01065	FCV17_RS02045	FCV16_RS18785	FCV18_RS10290	JPH1_RS23085
MAV_RS22445	MAH_RS20055	BBJ32_RS07195	KV38_RS21880	BS641_RS23745	BEP52_RS21335	BJP78_RS21730	BJP74_RS20970	DFS55_RS03070	DBO90_RS20645	EX350_RS01060	FCV17_RS02050	FCV16_RS18790	FCV18_RS10295	JPH1_RS23090
MAV_RS22450	MAH_RS20060	BBJ32_RS07200	KV38_RS21885	BS641_RS23750	BEP52_RS21340	BJP78_RS21735	BJP74_RS20975	DFS55_RS03065	DBO90_RS20650	EX350_RS01055	FCV17_RS02055	FCV16_RS18795	FCV18_RS10300	JPH1_RS23095
MAV_RS22470	MAH_RS20080	BBJ32_RS07220	KV38_RS21910	BS641_RS23775	BEP52_RS21365	BJP78_RS21765	BJP74_RS21000	DFS55_RS03040	DBO90_RS20675	EX350_RS01030	FCV17_RS02080	FCV16_RS18820	FCV18_RS10325	JPH1_RS23120
MAV_RS22510	MAH_RS20120	BBJ32_RS07260	KV38_RS21950	BS641_RS23820	BEP52_RS21405	BJP78_RS21805	BJP74_RS21040	DFS55_RS02995	DBO90_RS20715	EX350_RS00985	FCV17_RS02120	FCV16_RS18860	FCV18_RS10365	JPH1_RS23160
MAV_RS22570	MAH_RS20180	BBJ32_RS07320	KV38_RS22010	BS641_RS23880	BEP52_RS21465	BJP78_RS21865	BJP74_RS21100	DFS55_RS02935	DBO90_RS20775	EX350_RS00925	FCV17_RS02180	FCV16_RS18920	FCV18_RS10425	JPH1_RS23220
MAV_RS22580	MAH_RS20190	BBJ32_RS07330	KV38_RS22020	BS641_RS23890	BEP52_RS21475	BJP78_RS21875	BJP74_RS21110	DFS55_RS02925	DBO90_RS20785	EX350_RS00915	FCV17_RS02190	FCV16_RS18930	FCV18_RS10435	JPH1_RS23230
MAV_RS22585	MAH_RS20195	BBJ32_RS07335	KV38_RS22025	BS641_RS23895	BEP52_RS21480	BJP78_RS21880	BJP74_RS21115	DFS55_RS02920	DBO90_RS20790	EX350_RS00910	FCV17_RS02195	FCV16_RS18935	FCV18_RS10440	JPH1_RS23235
MAV_RS22645	MAH_RS20255	BBJ32_RS07395	KV38_RS22085	BS641_RS23955	BEP52_RS21540	BJP78_RS21940	BJP74_RS21175	DFS55_RS02850	DBO90_RS20850	EX350_RS00850	FCV17_RS02255	FCV16_RS18995	FCV18_RS10495	JPH1_RS23295
MAV_RS22660	MAH_RS20270	BBJ32_RS07410	KV38_RS22100	BS641_RS23970	BEP52_RS21555	BJP78_RS21955	BJP74_RS21190	DFS55_RS02835	DBO90_RS20865	EX350_RS00835	FCV17_RS02270	FCV16_RS19010	FCV18_RS10510	JPH1_RS23310
MAV_RS22720	MAH_RS20330	BBJ32_RS07470	KV38_RS22160	BS641_RS24030	BEP52_RS21615	BJP78_RS22015	BJP74_RS21250	DFS55_RS02775	DBO90_RS20925	EX350_RS00775	FCV17_RS02355	FCV16_RS19095	FCV18_RS10595	JPH1_RS23395
MAV_RS22725	MAH_RS20335	BBJ32_RS07475	KV38_RS22165	BS641_RS24035	BEP52_RS21620	BJP78_RS22020	BJP74_RS21255	DFS55_RS02770	DBO90_RS20930	EX350_RS00770	FCV17_RS02360	FCV16_RS19100	FCV18_RS10600	JPH1_RS23400
MAV_RS22755	MAH_RS20365	BBJ32_RS07505	KV38_RS22195	BS641_RS24065	BEP52_RS21650	BJP78_RS22050	BJP74_RS21285	DFS55_RS02740	DBO90_RS20960	EX350_RS00740	FCV17_RS02390	FCV16_RS19130	FCV18_RS10630	JPH1_RS23430
MAV_RS22890	MAH_RS20500	BBJ32_RS07640	KV38_RS22330	BS641_RS24200	BEP52_RS21785	BJP78_RS22185	BJP74_RS21420	DFS55_RS02595	DBO90_RS21095	EX350_RS00600	FCV17_RS02525	FCV16_RS19265	FCV18_RS10765	JPH1_RS23565
MAV_RS22905	MAH_RS20515	BBJ32_RS07655	KV38_RS22345	BS641_RS24215	BEP52_RS21800	BJP78_RS22200	BJP74_RS21435	DFS55_RS02580	DBO90_RS21110	EX350_RS00585	FCV17_RS02540	FCV16_RS19280	FCV18_RS10780	JPH1_RS23580
MAV_RS22945	MAH_RS20555	BBJ32_RS07695	KV38_RS22390	BS641_RS24260	BEP52_RS21845	BJP78_RS22245	BJP74_RS21480	DFS55_RS02535	DBO90_RS21155	EX350_RS00540	FCV17_RS02585	FCV16_RS19325	FCV18_RS10825	JPH1_RS23625
MAV_RS22980	MAH_RS20590	BBJ32_RS07730	KV38_RS22425	BS641_RS24295	BEP52_RS21880	BJP78_RS22280	BJP74_RS21515	DFS55_RS02500	DBO90_RS21190	EX350_RS00505	FCV17_RS02620	FCV16_RS19360	FCV18_RS10860	JPH1_RS23660
MAV_RS23010	MAH_RS20620	BBJ32_RS07760	KV38_RS22455	BS641_RS24325	BEP52_RS21910	BJP78_RS22310	BJP74_RS21545	DFS55_RS02470	DBO90_RS21220	EX350_RS00455	FCV17_RS02650	FCV16_RS19390	FCV18_RS10890	JPH1_RS23710
MAV_RS23055	MAH_RS20665	BBJ32_RS07805	KV38_RS22500	BS641_RS24370	BEP52_RS21955	BJP78_RS22355	BJP74_RS21590	DFS55_RS02425	DBO90_RS21265	EX350_RS00410	FCV17_RS02695	FCV16_RS19435	FCV18_RS10935	JPH1_RS23755
MAV_RS23150	MAH_RS20760	BBJ32_RS07900	KV38_RS22595	BS641_RS24470	BEP52_RS22050	BJP78_RS22450	BJP74_RS21685	DFS55_RS02330	DBO90_RS21360	EX350_RS00315	FCV17_RS02790	FCV16_RS19530	FCV18_RS11030	JPH1_RS23850
MAV_RS23170	MAH_RS20780	BBJ32_RS07920	KV38_RS22615	BS641_RS24490	BEP52_RS22070	BJP78_RS22470	BJP74_RS21705	DFS55_RS02310	DBO90_RS21380	EX350_RS00295	FCV17_RS02810	FCV16_RS19550	FCV18_RS11050	JPH1_RS23870
MAV_RS23250	MAH_RS20855	BBJ32_RS08000	KV38_RS22695	BS641_RS24605	BEP52_RS22155	BJP78_RS22555	BJP74_RS21795	DFS55_RS02230	DBO90_RS21460	EX350_RS00170	FCV17_RS02925	FCV16_RS19665	FCV18_RS11165	JPH1_RS23990
MAV_RS23270	MAH_RS20875	BBJ32_RS08020	KV38_RS22715	BS641_RS24625	BEP52_RS22175	BJP78_RS22575	BJP74_RS21815	DFS55_RS02210	DBO90_RS21480	EX350_RS00150	FCV17_RS02945	FCV16_RS19685	FCV18_RS11185	JPH1_RS24010
MAV_RS23280	MAH_RS20885	BBJ32_RS08030	KV38_RS22725	BS641_RS24635	BEP52_RS22185	BJP78_RS22585	BJP74_RS21825	DFS55_RS02200	DBO90_RS21490	EX350_RS00140	FCV17_RS02955	FCV16_RS19695	FCV18_RS11195	JPH1_RS24020
MAV_RS23345	MAH_RS20950	BBJ32_RS08095	KV38_RS22795	BS641_RS24705	BEP52_RS22255	BJP78_RS22655	BJP74_RS21895	DFS55_RS02130	DBO90_RS21560	EX350_RS00070	FCV17_RS03035	FCV16_RS19775	FCV18_RS11265	JPH1_RS24090
MAV_RS23455	MAH_RS21060	BBJ32_RS08205	KV38_RS22905	BS641_RS24815	BEP52_RS22365	BJP78_RS22770	BJP74_RS22005	DFS55_RS02020	DBO90_RS21670	EX350_RS25645	FCV17_RS03145	FCV16_RS19885	FCV18_RS11375	JPH1_RS24200
MAV_RS23510	MAH_RS21115	BBJ32_RS08260	KV38_RS22960	BS641_RS24870	BEP52_RS22425	BJP78_RS22830	BJP74_RS22060	DFS55_RS01960	DBO90_RS21730	EX350_RS25585	FCV17_RS03205	FCV16_RS19945	FCV18_RS11435	JPH1_RS24260
MAV_RS23695	MAH_RS21300	BBJ32_RS08450	KV38_RS23155	BS641_RS25065	BEP52_RS22620	BJP78_RS23025	BJP74_RS22255	DFS55_RS01765	DBO90_RS21925	EX350_RS25390	FCV17_RS03400	FCV16_RS20140	FCV18_RS11630	JPH1_RS24455
MAV_RS23740	MAH_RS21345	BBJ32_RS08495	KV38_RS23200	BS641_RS25110	BEP52_RS22665	BJP78_RS23070	BJP74_RS22300	DFS55_RS01720	DBO90_RS21970	EX350_RS25345	FCV17_RS03445	FCV16_RS20185	FCV18_RS11675	JPH1_RS24500
MAV_RS23750	MAH_RS21355	BBJ32_RS08505	KV38_RS23210	BS641_RS25120	BEP52_RS22675	BJP78_RS23080	BJP74_RS22310	DFS55_RS01710	DBO90_RS21980	EX350_RS25335	FCV17_RS03455	FCV16_RS20195	FCV18_RS11685	JPH1_RS24510
MAV_RS23980	MAH_RS21585	BBJ32_RS08735	KV38_RS23440	BS641_RS25350	BEP52_RS22875	BJP78_RS23280	BJP74_RS22510	DFS55_RS01480	DBO90_RS22210	EX350_RS25105	FCV17_RS03685	FCV16_RS20425	FCV18_RS11915	JPH1_RS24740
MAV_RS26275	MAH_RS24185	BBJ32_RS22925	KV38_RS23450	BS641_RS25360	BEP52_RS22885	BJP78_RS23290	BJP74_RS22520	DFS55_RS01470	DBO90_RS22220	EX350_RS25095	FCV17_RS03695	FCV16_RS20435	FCV18_RS11925	JPH1_RS24750
MAV_RS24045	MAH_RS21650	BBJ32_RS08800	KV38_RS23515	BS641_RS25420	BEP52_RS22945	BJP78_RS23350	BJP74_RS22580	DFS55_RS01405	DBO90_RS22280	EX350_RS25035	FCV17_RS03755	FCV16_RS20495	FCV18_RS11985	JPH1_RS24815
MAV_RS24060	MAH_RS21665	BBJ32_RS08815	KV38_RS23530	BS641_RS25435	BEP52_RS22960	BJP78_RS23365	BJP74_RS22595	DFS55_RS01390	DBO90_RS22295	EX350_RS25020	FCV17_RS03770	FCV16_RS20510	FCV18_RS12000	JPH1_RS24830
MAV_RS24085	MAH_RS21690	BBJ32_RS08840	KV38_RS23555	BS641_RS25460	BEP52_RS22985	BJP78_RS23390	BJP74_RS22620	DFS55_RS01365	DBO90_RS22320	EX350_RS24995	FCV17_RS03795	FCV16_RS20535	FCV18_RS12025	JPH1_RS24855
MAV_RS24125	MAH_RS21730	BBJ32_RS08880	KV38_RS23595	BS641_RS25500	BEP52_RS23025	BJP78_RS23430	BJP74_RS22660	DFS55_RS01325	DBO90_RS22360	EX350_RS24955	FCV17_RS03835	FCV16_RS20575	FCV18_RS12065	JPH1_RS24895
MAV_RS24130	MAH_RS21735	BBJ32_RS08885	KV38_RS23600	BS641_RS25505	BEP52_RS23030	BJP78_RS23435	BJP74_RS22665	DFS55_RS01320	DBO90_RS22365	EX350_RS24950	FCV17_RS03840	FCV16_RS20580	FCV18_RS12070	JPH1_RS24900
MAV_RS24550	MAH_RS21740	BBJ32_RS08920	KV38_RS23605	BS641_RS25510	BEP52_RS23035	BJP78_RS23440	BJP74_RS22670	DFS55_RS01315	DBO90_RS22405	EX350_RS24945	FCV17_RS03845	FCV16_RS20585	FCV18_RS12075	JPH1_RS24905
MAV_RS24565	MAH_RS21755	BBJ32_RS08935	KV38_RS23620	BS641_RS25525	BEP52_RS23050	BJP78_RS23455	BJP74_RS22685	DFS55_RS01300	DBO90_RS22420	EX350_RS24930	FCV17_RS03860	FCV16_RS20600	FCV18_RS12090	JPH1_RS24920
MAV_RS24750	MAH_RS21945	BBJ32_RS09120	KV38_RS23810	BS641_RS25715	BEP52_RS23245	BJP78_RS23650	BJP74_RS22880	DFS55_RS01110	DBO90_RS22610	EX350_RS24740	FCV17_RS04050	FCV16_RS20790	FCV18_RS12280	JPH1_RS25110
MAV_RS24885	MAH_RS22115	BBJ32_RS09270	KV38_RS23945	BS641_RS25850	BEP52_RS23420	BJP78_RS23825	BJP74_RS23055	DFS55_RS00975	DBO90_RS22735	EX350_RS24605	FCV17_RS04185	FCV16_RS20925	FCV18_RS12415	JPH1_RS25245
MAV_RS24920	MAH_RS22150	BBJ32_RS09305	KV38_RS23980	BS641_RS25890	BEP52_RS23455	BJP78_RS23860	BJP74_RS23090	DFS55_RS00940	DBO90_RS22700	EX350_RS24570	FCV17_RS04220	FCV16_RS20960	FCV18_RS12450	JPH1_RS25280
MAV_RS24945	MAH_RS22175	BBJ32_RS09330	KV38_RS24010	BS641_RS25915	BEP52_RS23485	BJP78_RS23890	BJP74_RS23120	DFS55_RS00910	DBO90_RS22670	EX350_RS24540	FCV17_RS04245	FCV16_RS20985	FCV18_RS12475	JPH1_RS25305
MAV_RS26335	MAH_RS24195	BBJ32_RS22940	KV38_RS24020	BS641_RS25925	BEP52_RS23495	BJP78_RS23900	BJP74_RS23130	DFS55_RS00900	DBO90_RS22660	EX350_RS24530	FCV17_RS04255	FCV16_RS20995	FCV18_RS12485	JPH1_RS25315
MAV_RS25015	MAH_RS22245	BBJ32_RS09405	KV38_RS24085	BS641_RS25990	BEP52_RS23560	BJP78_RS23965	BJP74_RS23195	DFS55_RS00835	DBO90_RS22905	EX350_RS24465	FCV17_RS04320	FCV16_RS21060	FCV18_RS12550	JPH1_RS25380
MAV_RS25020	MAH_RS22250	BBJ32_RS09410	KV38_RS24090	BS641_RS25995	BEP52_RS23565	BJP78_RS23970	BJP74_RS23200	DFS55_RS00830	DBO90_RS22910	EX350_RS24460	FCV17_RS04325	FCV16_RS21065	FCV18_RS12555	JPH1_RS25385
MAV_RS25025	MAH_RS22255	BBJ32_RS09415	KV38_RS24095	BS641_RS26000	BEP52_RS23570	BJP78_RS23975	BJP74_RS23205	DFS55_RS00825	DBO90_RS22915	EX350_RS24455	FCV17_RS04330	FCV16_RS21070	FCV18_RS12560	JPH1_RS25390
MAV_RS25050	MAH_RS22280	BBJ32_RS09440	KV38_RS24125	BS641_RS26030	BEP52_RS23600	BJP78_RS24005	BJP74_RS23235	DFS55_RS00795	DBO90_RS22945	EX350_RS24425	FCV17_RS04360	FCV16_RS21100	FCV18_RS12590	JPH1_RS25420
MAV_RS25080	MAH_RS22310	BBJ32_RS09470	KV38_RS24155	BS641_RS26060	BEP52_RS23630	BJP78_RS24035	BJP74_RS23265	DFS55_RS00765	DBO90_RS22975	EX350_RS24395	FCV17_RS04390	FCV16_RS21130	FCV18_RS12620	JPH1_RS25450
MAV_RS25120	MAH_RS22345	BBJ32_RS09510	KV38_RS24195	BS641_RS26100	BEP52_RS23665	BJP78_RS24070	BJP74_RS23300	DFS55_RS00725	DBO90_RS23015	EX350_RS24355	FCV17_RS04430	FCV16_RS21170	FCV18_RS12660	JPH1_RS25490
MAV_RS01820	MAH_RS01685	BBJ32_RS10605	KV38_RS01740	BS641_RS01685	BEP52_RS01620	BJP78_RS01625	BJP74_RS01605	DFS55_RS23025	DBO90_RS04465	EX350_RS22055	FCV17_RS06590	FCV16_RS23310	FCV18_RS14795	JPH1_RS01630
MAV_RS25145	MAH_RS22370	BBJ32_RS09535	KV38_RS24220	BS641_RS26125	BEP52_RS23690	BJP78_RS24095	BJP74_RS23325	DFS55_RS00700	DBO90_RS23040	EX350_RS24330	FCV17_RS04455	FCV16_RS21195	FCV18_RS12685	JPH1_RS25515
MAV_RS25165	MAH_RS22390	BBJ32_RS09555	KV38_RS24240	BS641_RS26145	BEP52_RS23710	BJP78_RS24115	BJP74_RS23345	DFS55_RS00680	DBO90_RS23065	EX350_RS24310	FCV17_RS04475	FCV16_RS21215	FCV18_RS12705	JPH1_RS25535
MAV_RS25210	MAH_RS22435	BBJ32_RS09600	KV38_RS24285	BS641_RS26190	BEP52_RS23755	BJP78_RS24160	BJP74_RS23390	DFS55_RS00635	DBO90_RS23110	EX350_RS24265	FCV17_RS04555	FCV16_RS21270	FCV18_RS12760	JPH1_RS25580
MAV_RS25335	MAH_RS22560	BBJ32_RS09725	KV38_RS24410	BS641_RS26315	BEP52_RS23880	BJP78_RS24285	BJP74_RS23515	DFS55_RS00510	DBO90_RS23235	EX350_RS24140	FCV17_RS04680	FCV16_RS21395	FCV18_RS12885	JPH1_RS25705
MAV_RS25380	MAH_RS22610	BBJ32_RS09775	KV38_RS24465	BS641_RS26375	BEP52_RS23935	BJP78_RS24340	BJP74_RS23570	DFS55_RS00455	DBO90_RS23295	EX350_RS24085	FCV17_RS04730	FCV16_RS21445	FCV18_RS12935	JPH1_RS25755
MAV_RS25390	MAH_RS22620	BBJ32_RS09785	KV38_RS24475	BS641_RS26385	BEP52_RS23945	BJP78_RS24350	BJP74_RS23580	DFS55_RS00445	DBO90_RS23305	EX350_RS24075	FCV17_RS04740	FCV16_RS21455	FCV18_RS12945	JPH1_RS25765
MAV_RS25455	MAH_RS22685	BBJ32_RS09850	KV38_RS24545	BS641_RS26455	BEP52_RS24020	BJP78_RS24425	BJP74_RS23655	DFS55_RS24550	DBO90_RS23375	EX350_RS24005	FCV17_RS04810	FCV16_RS21525	FCV18_RS13015	JPH1_RS25835
MAV_RS02510	MAH_RS02215	BBJ32_RS12065	KV38_RS02285	BS641_RS02230	BEP52_RS02175	BJP78_RS02180	BJP74_RS02160	DFS55_RS22465	DBO90_RS03515	EX350_RS21485	FCV17_RS07140	FCV16_RS23860	FCV18_RS15345	JPH1_RS02190
MAV_RS26360	MAH_RS24220	BBJ32_RS22970	KV38_RS24575	BS641_RS26485	BEP52_RS24050	BJP78_RS24455	BJP74_RS23685	DFS55_RS24580	DBO90_RS23405	EX350_RS23975	FCV17_RS04840	FCV16_RS21555	FCV18_RS13045	JPH1_RS25865
MAV_RS25490	MAH_RS22720	BBJ32_RS09885	KV38_RS24580	BS641_RS26490	BEP52_RS24055	BJP78_RS24460	BJP74_RS23690	DFS55_RS24585	DBO90_RS23410	EX350_RS23970	FCV17_RS04845	FCV16_RS21560	FCV18_RS13050	JPH1_RS25870
MAV_RS02000	MAH_RS01875	BBJ32_RS10420	KV38_RS01930	BS641_RS01875	BEP52_RS01815	BJP78_RS01820	BJP74_RS01800	DFS55_RS22835	DBO90_RS04650	EX350_RS21855	FCV17_RS06780	FCV16_RS23500	FCV18_RS14985	JPH1_RS01820
MAV_RS02570	MAH_RS02275	BBJ32_RS12125	KV38_RS02345	BS641_RS02290	BEP52_RS02235	BJP78_RS02240	BJP74_RS02220	DFS55_RS22405	DBO90_RS00750	EX350_RS21425	FCV17_RS07200	FCV16_RS23920	FCV18_RS15405	JPH1_RS02250
MAV_RS05515	MAH_RS05020	BBJ32_RS03235	KV38_RS05245	BS641_RS06790	BEP52_RS05540	BJP78_RS05535	BJP74_RS05080	DFS55_RS19625	DBO90_RS15665	EX350_RS17325	FCV17_RS10410	FCV16_RS02950	FCV18_RS19260	JPH1_RS06825
MAV_RS06515	MAH_RS05995	BBJ32_RS02260	KV38_RS06250	BS641_RS07790	BEP52_RS06540	BJP78_RS06535	BJP74_RS06080	DFS55_RS18615	DBO90_RS14660	EX350_RS16320	FCV17_RS11460	FCV16_RS04000	FCV18_RS20320	JPH1_RS07870
MAV_RS07560	MAH_RS06830	BBJ32_RS01505	KV38_RS07185	BS641_RS15785	BEP52_RS07400	BJP78_RS07385	BJP74_RS06925	DFS55_RS17575	DBO90_RS13785	EX350_RS15330	FCV17_RS19700	FCV16_RS12240	FCV18_RS03730	JPH1_RS09150
MAV_RS09660	MAH_RS08095	BBJ32_RS18870	KV38_RS08615	BS641_RS14475	BEP52_RS08715	BJP78_RS08700	BJP74_RS08250	DFS55_RS16180	DBO90_RS12015	EX350_RS13960	FCV17_RS18415	FCV16_RS10955	FCV18_RS02445	JPH1_RS10480
MAV_RS16245	MAH_RS09445	BBJ32_RS17140	KV38_RS14935	BS641_RS17280	BEP52_RS10100	BJP78_RS10085	BJP74_RS09800	DFS55_RS09635	DBO90_RS05315	EX350_RS07480	FCV17_RS12330	FCV16_RS04870	FCV18_RS21190	JPH1_RS16765
MAV_RS15450	MAH_RS10195	BBJ32_RS17890	KV38_RS14115	BS641_RS16470	BEP52_RS10865	BJP78_RS10850	BJP74_RS15075	DFS55_RS10445	DBO90_RS06100	EX350_RS08215	FCV17_RS13075	FCV16_RS05615	FCV18_RS21925	JPH1_RS16020
MAV_RS05090	MAH_RS04510	BBJ32_RS03720	KV38_RS04715	BS641_RS06285	BEP52_RS05030	BJP78_RS05020	BJP74_RS04560	DFS55_RS20145	DBO90_RS16165	EX350_RS17855	FCV17_RS09965	FCV16_RS02500	FCV18_RS18725	JPH1_RS06320
MAV_RS13720	MAH_RS11870	BBJ32_RS21865	KV38_RS11915	BS641_RS10505	BEP52_RS12930	BJP78_RS12915	BJP74_RS13015	DFS55_RS12750	DBO90_RS07710	EX350_RS10525	FCV17_RS15245	FCV16_RS07785	FCV18_RS24125	JPH1_RS13665
MAV_RS16960	MAH_RS14495	BBJ32_RS16280	KV38_RS15645	BS641_RS18205	BEP52_RS15595	BJP78_RS15845	BJP74_RS15285	DFS55_RS08930	DBO90_RS09410	EX350_RS06690	FCV17_RS20695	FCV16_RS13235	FCV18_RS04730	JPH1_RS17580
MAV_RS18080	MAH_RS15625	BBJ32_RS15190	KV38_RS16765	BS641_RS19310	BEP52_RS16755	BJP78_RS17010	BJP74_RS16445	DFS55_RS07810	DBO90_RS02995	EX350_RS05565	FCV17_RS21815	FCV16_RS14350	FCV18_RS05850	JPH1_RS18700
MAV_RS05460	MAH_RS04965	BBJ32_RS03290	KV38_RS05185	BS641_RS06730	BEP52_RS05480	BJP78_RS05475	BJP74_RS05020	DFS55_RS19695	DBO90_RS15725	EX350_RS17385	FCV17_RS10350	FCV16_RS02890	FCV18_RS19200	JPH1_RS06765
MAV_RS18970	MAH_RS16575	BBJ32_RS14395	KV38_RS17745	BS641_RS20145	BEP52_RS17570	BJP78_RS17970	BJP74_RS17260	DFS55_RS06845	DBO90_RS02190	EX350_RS04705	FCV17_RS22645	FCV16_RS15180	FCV18_RS06680	JPH1_RS19525
MAV_RS19855	MAH_RS17445	BBJ32_RS04595	KV38_RS19175	BS641_RS21040	BEP52_RS18495	BJP78_RS18895	BJP74_RS18185	DFS55_RS05765	DBO90_RS17990	EX350_RS03830	FCV17_RS23515	FCV16_RS16060	FCV18_RS07560	JPH1_RS20400
MAV_RS05620	MAH_RS05125	BBJ32_RS03130	KV38_RS05350	BS641_RS06895	BEP52_RS05645	BJP78_RS05640	BJP74_RS05185	DFS55_RS19520	DBO90_RS15560	EX350_RS17220	FCV17_RS10515	FCV16_RS03055	FCV18_RS19365	JPH1_RS06925
MAV_RS22520	MAH_RS20130	BBJ32_RS07270	KV38_RS21960	BS641_RS23830	BEP52_RS21415	BJP78_RS21815	BJP74_RS21050	DFS55_RS02985	DBO90_RS20725	EX350_RS00975	FCV17_RS02130	FCV16_RS18870	FCV18_RS10375	JPH1_RS23170
MAV_RS23005	MAH_RS20615	BBJ32_RS07755	KV38_RS22450	BS641_RS24320	BEP52_RS21905	BJP78_RS22305	BJP74_RS21540	DFS55_RS02475	DBO90_RS21215	EX350_RS00460	FCV17_RS02645	FCV16_RS19385	FCV18_RS10885	JPH1_RS23705
MAV_RS23210	MAH_RS20820	BBJ32_RS07960	KV38_RS22655	BS641_RS24530	BEP52_RS22110	BJP78_RS22510	BJP74_RS21745	DFS55_RS02270	DBO90_RS21420	EX350_RS00255	FCV17_RS02850	FCV16_RS19590	FCV18_RS11090	JPH1_RS23910
MAV_RS08075	MAH_RS07340	BBJ32_RS00855	KV38_RS07835	BS641_RS15265	BEP52_RS07930	BJP78_RS07915	BJP74_RS07455	DFS55_RS16955	DBO90_RS13220	EX350_RS14805	FCV17_RS19180	FCV16_RS11720	FCV18_RS03210	JPH1_RS09670
MAV_RS06195	MAH_RS05670	BBJ32_RS02585	KV38_RS05920	BS641_RS07460	BEP52_RS06210	BJP78_RS06205	BJP74_RS05750	DFS55_RS18945	DBO90_RS14990	EX350_RS16655	FCV17_RS11130	FCV16_RS03670	FCV18_RS19980	JPH1_RS07540
MAV_RS19550	MAH_RS17160	BBJ32_RS04285	KV38_RS18770	BS641_RS20750	BEP52_RS18160	BJP78_RS18560	BJP74_RS17850	DFS55_RS06265	DBO90_RS17695	EX350_RS04120	FCV17_RS23240	FCV16_RS15775	FCV18_RS07275	JPH1_RS20110
MAV_RS24965	MAH_RS22195	BBJ32_RS09355	KV38_RS24035	BS641_RS25940	BEP52_RS23510	BJP78_RS23915	BJP74_RS23145	DFS55_RS00885	DBO90_RS22855	EX350_RS24515	FCV17_RS04270	FCV16_RS21010	FCV18_RS12500	JPH1_RS25330
MAV_RS11240	MAH_RS13560	BBJ32_RS20235	KV38_RS10260	BS641_RS12670	BEP52_RS14650	BJP78_RS14905	BJP74_RS11315	DFS55_RS14530	DBO90_RS10605	EX350_RS12385	FCV17_RS17000	FCV16_RS09540	FCV18_RS01030	JPH1_RS11930
MAV_RS01065	MAH_RS01150	BBJ32_RS11155	KV38_RS01055	BS641_RS01120	BEP52_RS01050	BJP78_RS01060	BJP74_RS01035	DFS55_RS23790	DBO90_RS03915	EX350_RS22725	FCV17_RS06000	FCV16_RS22720	FCV18_RS14205	JPH1_RS01060
MAV_RS06215	MAH_RS05690	BBJ32_RS02560	KV38_RS05945	BS641_RS07485	BEP52_RS06235	BJP78_RS06230	BJP74_RS05775	DFS55_RS18920	DBO90_RS14965	EX350_RS16630	FCV17_RS11155	FCV16_RS03695	FCV18_RS20005	JPH1_RS07565
MAV_RS10040	MAH_RS08470	BBJ32_RS19225	KV38_RS08980	BS641_RS13955	BEP52_RS09095	BJP78_RS09090	BJP74_RS08635	DFS55_RS15670	DBO90_RS11650	EX350_RS13595	FCV17_RS18060	FCV16_RS10600	FCV18_RS02090	JPH1_RS10850
MAV_RS17360	MAH_RS14880	BBJ32_RS15900	KV38_RS16030	BS641_RS18585	BEP52_RS15980	BJP78_RS16230	BJP74_RS15670	DFS55_RS08545	DBO90_RS09795	EX350_RS06300	FCV17_RS21075	FCV16_RS13615	FCV18_RS05110	JPH1_RS17965
MAV_RS20320	MAH_RS17910	BBJ32_RS05070	KV38_RS19660	BS641_RS21520	BEP52_RS18980	BJP78_RS19380	BJP74_RS18670	DFS55_RS05280	DBO90_RS18485	EX350_RS03345	FCV17_RS24040	FCV16_RS16575	FCV18_RS08080	JPH1_RS20885
MAV_RS23140	MAH_RS20750	BBJ32_RS07890	KV38_RS22585	BS641_RS24460	BEP52_RS22040	BJP78_RS22440	BJP74_RS21675	DFS55_RS02340	DBO90_RS21350	EX350_RS00325	FCV17_RS02780	FCV16_RS19520	FCV18_RS11020	JPH1_RS23840
MAV_RS05215	MAH_RS04635	BBJ32_RS03595	KV38_RS04840	BS641_RS06410	BEP52_RS05155	BJP78_RS05145	BJP74_RS04690	DFS55_RS20020	DBO90_RS16040	EX350_RS17730	FCV17_RS10095	FCV16_RS02630	FCV18_RS18850	JPH1_RS06445
MAV_RS07375	MAH_RS06630	BBJ32_RS01620	KV38_RS06960	BS641_RS15970	BEP52_RS07180	BJP78_RS07180	BJP74_RS06720	DFS55_RS17790	DBO90_RS13990	EX350_RS15520	FCV17_RS19885	FCV16_RS12425	FCV18_RS03920	JPH1_RS08960
MAV_RS07545	MAH_RS06815	BBJ32_RS01490	KV38_RS07170	BS641_RS15800	BEP52_RS07385	BJP78_RS07370	BJP74_RS06910	DFS55_RS17590	DBO90_RS13800	EX350_RS15345	FCV17_RS19715	FCV16_RS12255	FCV18_RS03745	JPH1_RS09135
MAV_RS25845	MAH_RS23765	BBJ32_RS22785	KV38_RS07400	BS641_RS15570	BEP52_RS07620	BJP78_RS07605	BJP74_RS07145	DFS55_RS17360	DBO90_RS13565	EX350_RS15115	FCV17_RS19485	FCV16_RS12025	FCV18_RS03515	JPH1_RS09365
MAV_RS07965	MAH_RS07240	BBJ32_RS00955	KV38_RS07730	BS641_RS15370	BEP52_RS07825	BJP78_RS07810	BJP74_RS07350	DFS55_RS17060	DBO90_RS13320	EX350_RS14915	FCV17_RS19285	FCV16_RS11825	FCV18_RS03315	JPH1_RS09565
MAV_RS10070	MAH_RS08500	BBJ32_RS19255	KV38_RS09010	BS641_RS13925	BEP52_RS09125	BJP78_RS09120	BJP74_RS08665	DFS55_RS15640	DBO90_RS11620	EX350_RS13565	FCV17_RS18030	FCV16_RS10570	FCV18_RS02060	JPH1_RS10880
MAV_RS10325	MAH_RS14340	BBJ32_RS19500	KV38_RS09270	BS641_RS13605	BEP52_RS15445	BJP78_RS15695	BJP74_RS10515	DFS55_RS15360	DBO90_RS11360	EX350_RS13305	FCV17_RS17760	FCV16_RS10300	FCV18_RS01790	JPH1_RS11170
MAV_RS26010	MAH_RS23940	BBJ32_RS23300	KV38_RS10595	BS641_RS12375	BEP52_RS14330	BJP78_RS14585	BJP74_RS11635	DFS55_RS14215	DBO90_RS09095	EX350_RS12080	FCV17_RS16695	FCV16_RS09235	FCV18_RS00725	JPH1_RS12235
MAV_RS11550	MAH_RS13280	BBJ32_RS20535	KV38_RS10610	BS641_RS12350	BEP52_RS14315	BJP78_RS14570	BJP74_RS11650	DFS55_RS14200	DBO90_RS09080	EX350_RS12055	FCV17_RS16670	FCV16_RS09210	FCV18_RS00700	JPH1_RS12260
MAV_RS11785	MAH_RS13065	BBJ32_RS20745	KV38_RS10830	BS641_RS12120	BEP52_RS14105	BJP78_RS14360	BJP74_RS11860	DFS55_RS13980	DBO90_RS08865	EX350_RS11825	FCV17_RS16430	FCV16_RS08970	FCV18_RS25310	JPH1_RS12490
MAV_RS13265	MAH_RS12305	BBJ32_RS21410	KV38_RS11495	BS641_RS10985	BEP52_RS13375	BJP78_RS13360	BJP74_RS12570	DFS55_RS13165	DBO90_RS08180	EX350_RS10985	FCV17_RS15695	FCV16_RS08235	FCV18_RS24575	JPH1_RS13200
MAV_RS13285	MAH_RS12285	BBJ32_RS21430	KV38_RS11515	BS641_RS10965	BEP52_RS13355	BJP78_RS13340	BJP74_RS12590	DFS55_RS13145	DBO90_RS08160	EX350_RS10965	FCV17_RS15675	FCV16_RS08215	FCV18_RS24555	JPH1_RS13220
MAV_RS14065	MAH_RS11525	BBJ32_RS22195	KV38_RS12265	BS641_RS10165	BEP52_RS12590	BJP78_RS12575	BJP74_RS13355	DFS55_RS12390	DBO90_RS07380	EX350_RS10195	FCV17_RS14880	FCV16_RS07420	FCV18_RS23755	JPH1_RS14030
MAV_RS14450	MAH_RS11160	BBJ32_RS22455	KV38_RS12660	BS641_RS09770	BEP52_RS12225	BJP78_RS12210	BJP74_RS13720	DFS55_RS11995	DBO90_RS07120	EX350_RS09825	FCV17_RS14470	FCV16_RS07010	FCV18_RS23610	JPH1_RS14410
MAV_RS14815	MAH_RS10830	BBJ32_RS00025	KV38_RS13460	BS641_RS08795	BEP52_RS11525	BJP78_RS11510	BJP74_RS14420	DFS55_RS11100	DBO90_RS06770	EX350_RS08880	FCV17_RS13750	FCV16_RS06290	FCV18_RS22600	JPH1_RS15360
MAV_RS16805	MAH_RS08880	BBJ32_RS16555	KV38_RS15500	BS641_RS18020	BEP52_RS09510	BJP78_RS09505	BJP74_RS09060	DFS55_RS09075	DBO90_RS03200	EX350_RS06870	FCV17_RS20515	FCV16_RS13055	FCV18_RS04550	JPH1_RS17405
MAV_RS16880	MAH_RS08805	BBJ32_RS16480	KV38_RS15575	BS641_RS18095	BEP52_RS09435	BJP78_RS09430	BJP74_RS08985	DFS55_RS09000	DBO90_RS03125	EX350_RS06795	FCV17_RS20590	FCV16_RS13130	FCV18_RS04625	JPH1_RS17480
MAV_RS17910	MAH_RS15455	BBJ32_RS15360	KV38_RS16590	BS641_RS19135	BEP52_RS16580	BJP78_RS16835	BJP74_RS16270	DFS55_RS07985	DBO90_RS10360	EX350_RS05740	FCV17_RS21640	FCV16_RS14180	FCV18_RS05675	JPH1_RS18525
MAV_RS18605	MAH_RS16210	BBJ32_RS14755	KV38_RS17365	BS641_RS19760	BEP52_RS17200	BJP78_RS17595	BJP74_RS16890	DFS55_RS07215	DBO90_RS02555	EX350_RS05085	FCV17_RS22260	FCV16_RS14795	FCV18_RS06295	JPH1_RS19145
MAV_RS18630	MAH_RS16235	BBJ32_RS14730	KV38_RS17390	BS641_RS19795	BEP52_RS17225	BJP78_RS17620	BJP74_RS16915	DFS55_RS07190	DBO90_RS02530	EX350_RS05060	FCV17_RS22285	FCV16_RS14820	FCV18_RS06320	JPH1_RS19170
MAV_RS18700	MAH_RS16310	BBJ32_RS14655	KV38_RS17470	BS641_RS19870	BEP52_RS17300	BJP78_RS17700	BJP74_RS16990	DFS55_RS07110	DBO90_RS02455	EX350_RS04980	FCV17_RS22365	FCV16_RS14900	FCV18_RS06400	JPH1_RS19250
MAV_RS19040	MAH_RS16645	BBJ32_RS14325	KV38_RS18255	BS641_RS20215	BEP52_RS17640	BJP78_RS18040	BJP74_RS17330	DFS55_RS06775	DBO90_RS02120	EX350_RS04635	FCV17_RS22715	FCV16_RS15250	FCV18_RS06750	JPH1_RS19595
MAV_RS19405	MAH_RS17005	BBJ32_RS04140	KV38_RS18625	BS641_RS20605	BEP52_RS18010	BJP78_RS18410	BJP74_RS17700	DFS55_RS06410	DBO90_RS01690	EX350_RS04265	FCV17_RS23095	FCV16_RS15630	FCV18_RS07130	JPH1_RS19965
MAV_RS19590	MAH_RS17200	BBJ32_RS04325	KV38_RS18810	BS641_RS20790	BEP52_RS18200	BJP78_RS18600	BJP74_RS17890	DFS55_RS06225	DBO90_RS17735	EX350_RS04080	FCV17_RS23280	FCV16_RS15815	FCV18_RS07315	JPH1_RS20150
MAV_RS19640	MAH_RS17250	BBJ32_RS04375	KV38_RS18860	BS641_RS20840	BEP52_RS18250	BJP78_RS18650	BJP74_RS17940	DFS55_RS06175	DBO90_RS17785	EX350_RS04030	FCV17_RS23330	FCV16_RS15865	FCV18_RS07365	JPH1_RS20200
MAV_RS19760	MAH_RS17370	BBJ32_RS04495	KV38_RS18985	BS641_RS20960	BEP52_RS18375	BJP78_RS18775	BJP74_RS18065	DFS55_RS06050	DBO90_RS17905	EX350_RS03905	FCV17_RS23450	FCV16_RS15985	FCV18_RS07485	JPH1_RS20325
MAV_RS20055	MAH_RS17645	BBJ32_RS04795	KV38_RS19385	BS641_RS21245	BEP52_RS18705	BJP78_RS19105	BJP74_RS18395	DFS55_RS05555	DBO90_RS18200	EX350_RS03620	FCV17_RS23725	FCV16_RS16270	FCV18_RS07770	JPH1_RS20610
MAV_RS20590	MAH_RS18175	BBJ32_RS05340	KV38_RS19930	BS641_RS21795	BEP52_RS19255	BJP78_RS19655	BJP74_RS18945	DFS55_RS05010	DBO90_RS18760	EX350_RS03075	FCV17_RS24310	FCV16_RS16845	FCV18_RS08350	JPH1_RS21155
MAV_RS21240	MAH_RS18825	BBJ32_RS05990	KV38_RS20595	BS641_RS22470	BEP52_RS20065	BJP78_RS20315	BJP74_RS19705	DFS55_RS04350	DBO90_RS19420	EX350_RS02355	FCV17_RS00790	FCV16_RS17530	FCV18_RS09035	JPH1_RS21855
MAV_RS21655	MAH_RS19240	BBJ32_RS06405	KV38_RS21030	BS641_RS22885	BEP52_RS20480	BJP78_RS20880	BJP74_RS20120	DFS55_RS03915	DBO90_RS19835	EX350_RS01920	FCV17_RS01225	FCV16_RS17965	FCV18_RS09470	JPH1_RS22270
MAV_RS22035	MAH_RS19640	BBJ32_RS06785	KV38_RS21435	BS641_RS23285	BEP52_RS20890	BJP78_RS21285	BJP74_RS20525	DFS55_RS03510	DBO90_RS20215	EX350_RS01500	FCV17_RS01605	FCV16_RS18345	FCV18_RS09850	JPH1_RS22650
MAV_RS22670	MAH_RS20280	BBJ32_RS07420	KV38_RS22110	BS641_RS23980	BEP52_RS21565	BJP78_RS21965	BJP74_RS21200	DFS55_RS02825	DBO90_RS20875	EX350_RS00825	FCV17_RS02305	FCV16_RS19045	FCV18_RS10545	JPH1_RS23345
MAV_RS23610	MAH_RS21215	BBJ32_RS08360	KV38_RS23065	BS641_RS24975	BEP52_RS22530	BJP78_RS22935	BJP74_RS22165	DFS55_RS01855	DBO90_RS21835	EX350_RS25480	FCV17_RS03310	FCV16_RS20050	FCV18_RS11540	JPH1_RS24365
MAV_RS24585	MAH_RS21775	BBJ32_RS08955	KV38_RS23640	BS641_RS25545	BEP52_RS23070	BJP78_RS23475	BJP74_RS22705	DFS55_RS01280	DBO90_RS22440	EX350_RS24910	FCV17_RS03880	FCV16_RS20620	FCV18_RS12110	JPH1_RS24940
MAV_RS25365	MAH_RS22590	BBJ32_RS09755	KV38_RS24440	BS641_RS26345	BEP52_RS23910	BJP78_RS24315	BJP74_RS23545	DFS55_RS00480	DBO90_RS23265	EX350_RS24110	FCV17_RS04710	FCV16_RS21425	FCV18_RS12915	JPH1_RS25735
MAV_RS25400	MAH_RS22630	BBJ32_RS09795	KV38_RS24485	BS641_RS26395	BEP52_RS23955	BJP78_RS24360	BJP74_RS23590	DFS55_RS24480	DBO90_RS23315	EX350_RS24065	FCV17_RS04750	FCV16_RS21465	FCV18_RS12955	JPH1_RS25775
MAV_RS25475	MAH_RS22705	BBJ32_RS09870	KV38_RS24560	BS641_RS26470	BEP52_RS24035	BJP78_RS24440	BJP74_RS23670	DFS55_RS24565	DBO90_RS23390	EX350_RS23990	FCV17_RS04825	FCV16_RS21540	FCV18_RS13030	JPH1_RS25850
MAV_RS15140	MAH_RS10495	BBJ32_RS18195	KV38_RS13805	BS641_RS08450	BEP52_RS11175	BJP78_RS11160	BJP74_RS14765	DFS55_RS10755	DBO90_RS06410	EX350_RS08530	FCV17_RS13405	FCV16_RS05945	FCV18_RS22255	JPH1_RS15710
MAV_RS11020	MAH_RS13800	BBJ32_RS20015	KV38_RS09810	BS641_RS13075	BEP52_RS14905	BJP78_RS15155	BJP74_RS11065	DFS55_RS14830	DBO90_RS10830	EX350_RS12750	FCV17_RS17225	FCV16_RS09765	FCV18_RS01255	JPH1_RS11705
MAV_RS21060	MAH_RS18645	BBJ32_RS05810	KV38_RS20410	BS641_RS22285	BEP52_RS19880	BJP78_RS20130	BJP74_RS19520	DFS55_RS04535	DBO90_RS19235	EX350_RS02540	FCV17_RS00605	FCV16_RS17345	FCV18_RS08850	JPH1_RS21670
MAV_RS25590	MAH_RS00180	BBJ32_RS09935	KV38_RS00060	BS641_RS00090	BEP52_RS00065	BJP78_RS00065	BJP74_RS00065	DFS55_RS00055	DBO90_RS00050	EX350_RS23720	FCV17_RS04930	FCV16_RS21645	FCV18_RS13135	JPH1_RS00090
MAV_RS00220	MAH_RS00330	BBJ32_RS12000	KV38_RS00225	BS641_RS00245	BEP52_RS00225	BJP78_RS00235	BJP74_RS00210	DFS55_RS00225	DBO90_RS00230	EX350_RS23550	FCV17_RS05190	FCV16_RS21905	FCV18_RS13400	JPH1_RS00245
MAV_RS00480	MAH_RS00595	BBJ32_RS11735	KV38_RS00495	BS641_RS00510	BEP52_RS00495	BJP78_RS00505	BJP74_RS00480	DFS55_RS24370	DBO90_RS00500	EX350_RS23280	FCV17_RS05445	FCV16_RS22160	FCV18_RS13650	JPH1_RS00505
MAV_RS00530	MAH_RS00645	BBJ32_RS11685	KV38_RS00545	BS641_RS00560	BEP52_RS00545	BJP78_RS00555	BJP74_RS00530	DFS55_RS24320	DBO90_RS00550	EX350_RS23230	FCV17_RS05495	FCV16_RS22210	FCV18_RS13700	JPH1_RS00555
MAV_RS02550	MAH_RS02255	BBJ32_RS12105	KV38_RS02325	BS641_RS02270	BEP52_RS02215	BJP78_RS02220	BJP74_RS02200	DFS55_RS22425	DBO90_RS00730	EX350_RS21445	FCV17_RS07180	FCV16_RS23900	FCV18_RS15385	JPH1_RS02230
MAV_RS01060	MAH_RS01145	BBJ32_RS11160	KV38_RS01050	BS641_RS01115	BEP52_RS01045	BJP78_RS01055	BJP74_RS01030	DFS55_RS23795	DBO90_RS03910	EX350_RS22730	FCV17_RS05995	FCV16_RS22715	FCV18_RS14200	JPH1_RS01055
MAV_RS01530	MAH_RS01400	BBJ32_RS10905	KV38_RS01315	BS641_RS01390	BEP52_RS01315	BJP78_RS01320	BJP74_RS01295	DFS55_RS23530	DBO90_RS04180	EX350_RS22460	FCV17_RS06265	FCV16_RS22985	FCV18_RS14470	JPH1_RS01330
MAV_RS01695	MAH_RS01560	BBJ32_RS10730	KV38_RS01490	BS641_RS01560	BEP52_RS01490	BJP78_RS01495	BJP74_RS01475	DFS55_RS23270	DBO90_RS04340	EX350_RS22185	FCV17_RS06465	FCV16_RS23185	FCV18_RS14670	JPH1_RS01505
MAV_RS01765	MAH_RS01630	BBJ32_RS10660	KV38_RS01685	BS641_RS01630	BEP52_RS01565	BJP78_RS01570	BJP74_RS01550	DFS55_RS23080	DBO90_RS04410	EX350_RS22110	FCV17_RS06535	FCV16_RS23255	FCV18_RS14740	JPH1_RS01575
MAV_RS01785	MAH_RS01650	BBJ32_RS10640	KV38_RS01705	BS641_RS01650	BEP52_RS01585	BJP78_RS01590	BJP74_RS01570	DFS55_RS23060	DBO90_RS04430	EX350_RS22090	FCV17_RS06555	FCV16_RS23275	FCV18_RS14760	JPH1_RS01595
MAV_RS01790	MAH_RS01655	BBJ32_RS10635	KV38_RS01710	BS641_RS01655	BEP52_RS01590	BJP78_RS01595	BJP74_RS01575	DFS55_RS23055	DBO90_RS04435	EX350_RS22085	FCV17_RS06560	FCV16_RS23280	FCV18_RS14765	JPH1_RS01600
MAV_RS01905	MAH_RS01775	BBJ32_RS10515	KV38_RS01835	BS641_RS01780	BEP52_RS01720	BJP78_RS01725	BJP74_RS01705	DFS55_RS22930	DBO90_RS04555	EX350_RS21950	FCV17_RS06685	FCV16_RS23405	FCV18_RS14890	JPH1_RS01725
MAV_RS02030	MAH_RS01905	BBJ32_RS10390	KV38_RS01960	BS641_RS01905	BEP52_RS01850	BJP78_RS01855	BJP74_RS01835	DFS55_RS22800	DBO90_RS04680	EX350_RS21820	FCV17_RS06815	FCV16_RS23535	FCV18_RS15020	JPH1_RS01855
MAV_RS02075	MAH_RS01950	BBJ32_RS10345	KV38_RS02010	BS641_RS01955	BEP52_RS01900	BJP78_RS01905	BJP74_RS01885	DFS55_RS22750	DBO90_RS04730	EX350_RS21770	FCV17_RS06865	FCV16_RS23585	FCV18_RS15070	JPH1_RS01905
MAV_RS02145	MAH_RS02020	BBJ32_RS10275	KV38_RS02080	BS641_RS02025	BEP52_RS01970	BJP78_RS01975	BJP74_RS01955	DFS55_RS22670	DBO90_RS04800	EX350_RS21690	FCV17_RS06935	FCV16_RS23655	FCV18_RS15140	JPH1_RS01985
MAV_RS03100	MAH_RS02805	BBJ32_RS12655	KV38_RS02880	BS641_RS02860	BEP52_RS02780	BJP78_RS02785	BJP74_RS02755	DFS55_RS21870	DBO90_RS01280	EX350_RS20890	FCV17_RS07735	FCV16_RS24455	FCV18_RS15940	JPH1_RS02785
MAV_RS03500	MAH_RS03140	BBJ32_RS12995	KV38_RS03225	BS641_RS03525	BEP52_RS03120	BJP78_RS03125	BJP74_RS03095	DFS55_RS21525	DBO90_RS17610	EX350_RS20550	FCV17_RS08080	FCV16_RS24800	FCV18_RS16285	JPH1_RS03125
MAV_RS03590	MAH_RS03240	BBJ32_RS13095	KV38_RS03320	BS641_RS03620	BEP52_RS03220	BJP78_RS03225	BJP74_RS03195	DFS55_RS21430	DBO90_RS17510	EX350_RS20455	FCV17_RS08175	FCV16_RS24895	FCV18_RS16380	JPH1_RS03220
MAV_RS03730	MAH_RS03375	BBJ32_RS13225	KV38_RS03455	BS641_RS03755	BEP52_RS03355	BJP78_RS03360	BJP74_RS03330	DFS55_RS21290	DBO90_RS17370	EX350_RS20315	FCV17_RS08310	FCV16_RS25030	FCV18_RS16515	JPH1_RS03360
MAV_RS04055	MAH_RS03415	BBJ32_RS13265	KV38_RS03620	BS641_RS05245	BEP52_RS03490	BJP78_RS03490	BJP74_RS03460	DFS55_RS21185	DBO90_RS17220	EX350_RS18905	FCV17_RS08920	FCV16_RS01455	FCV18_RS17680	JPH1_RS05260
MAV_RS25740	MAH_RS23695	BBJ32_RS23060	KV38_RS03975	BS641_RS05600	BEP52_RS03845	BJP78_RS03845	BJP74_RS03815	DFS55_RS20830	DBO90_RS16860	EX350_RS18545	FCV17_RS09275	FCV16_RS01810	FCV18_RS18035	JPH1_RS05620
MAV_RS04415	MAH_RS03780	BBJ32_RS13625	KV38_RS03985	BS641_RS05610	BEP52_RS03855	BJP78_RS03855	BJP74_RS03825	DFS55_RS20820	DBO90_RS16850	EX350_RS18535	FCV17_RS09285	FCV16_RS01820	FCV18_RS18045	JPH1_RS05630
MAV_RS04485	MAH_RS03850	BBJ32_RS13695	KV38_RS04055	BS641_RS05680	BEP52_RS03925	BJP78_RS03925	BJP74_RS03895	DFS55_RS20750	DBO90_RS16780	EX350_RS18465	FCV17_RS09355	FCV16_RS01890	FCV18_RS18115	JPH1_RS05700
MAV_RS04505	MAH_RS03905	BBJ32_RS13715	KV38_RS04110	BS641_RS05700	BEP52_RS03980	BJP78_RS03980	BJP74_RS03950	DFS55_RS20730	DBO90_RS16760	EX350_RS18445	FCV17_RS09375	FCV16_RS01910	FCV18_RS18135	JPH1_RS05720
MAV_RS04645	MAH_RS04055	BBJ32_RS13855	KV38_RS04255	BS641_RS05840	BEP52_RS04125	BJP78_RS04130	BJP74_RS04095	DFS55_RS20590	DBO90_RS16625	EX350_RS18305	FCV17_RS09515	FCV16_RS02050	FCV18_RS18275	JPH1_RS05860
MAV_RS04755	MAH_RS04175	BBJ32_RS13965	KV38_RS04375	BS641_RS05950	BEP52_RS04245	BJP78_RS04250	BJP74_RS04215	DFS55_RS20480	DBO90_RS16515	EX350_RS18195	FCV17_RS09625	FCV16_RS02160	FCV18_RS18385	JPH1_RS05980
MAV_RS04820	MAH_RS04240	BBJ32_RS14030	KV38_RS04440	BS641_RS06015	BEP52_RS04310	BJP78_RS04315	BJP74_RS04280	DFS55_RS20415	DBO90_RS16450	EX350_RS18130	FCV17_RS09690	FCV16_RS02225	FCV18_RS18450	JPH1_RS06045
MAV_RS04945	MAH_RS04365	BBJ32_RS14155	KV38_RS04565	BS641_RS06140	BEP52_RS04435	BJP78_RS04440	BJP74_RS04405	DFS55_RS20290	DBO90_RS16325	EX350_RS18005	FCV17_RS09815	FCV16_RS02350	FCV18_RS18575	JPH1_RS06170
MAV_RS05315	MAH_RS04765	BBJ32_RS03490	KV38_RS04990	BS641_RS06525	BEP52_RS05285	BJP78_RS05280	BJP74_RS04825	DFS55_RS19890	DBO90_RS15920	EX350_RS17580	FCV17_RS10250	FCV16_RS02790	FCV18_RS19005	JPH1_RS06570
MAV_RS06405	MAH_RS05880	BBJ32_RS02370	KV38_RS06135	BS641_RS07675	BEP52_RS06425	BJP78_RS06420	BJP74_RS05965	DFS55_RS18730	DBO90_RS14775	EX350_RS16435	FCV17_RS11345	FCV16_RS03885	FCV18_RS20205	JPH1_RS07755
MAV_RS06485	MAH_RS05965	BBJ32_RS02290	KV38_RS06215	BS641_RS07755	BEP52_RS06505	BJP78_RS06500	BJP74_RS06045	DFS55_RS18650	DBO90_RS14695	EX350_RS16355	FCV17_RS11425	FCV16_RS03965	FCV18_RS20285	JPH1_RS07835
MAV_RS06525	MAH_RS06005	BBJ32_RS02250	KV38_RS06260	BS641_RS07800	BEP52_RS06550	BJP78_RS06545	BJP74_RS06090	DFS55_RS18605	DBO90_RS14650	EX350_RS16310	FCV17_RS11470	FCV16_RS04010	FCV18_RS20330	JPH1_RS07880
MAV_RS06715	MAH_RS06200	BBJ32_RS02050	KV38_RS06455	BS641_RS07995	BEP52_RS06745	BJP78_RS06740	BJP74_RS06285	DFS55_RS18405	DBO90_RS14450	EX350_RS16110	FCV17_RS11665	FCV16_RS04205	FCV18_RS20525	JPH1_RS08075
MAV_RS07245	MAH_RS06500	BBJ32_RS01750	KV38_RS06815	BS641_RS16125	BEP52_RS07050	BJP78_RS07050	BJP74_RS06590	DFS55_RS17945	DBO90_RS14120	EX350_RS15665	FCV17_RS20015	FCV16_RS12555	FCV18_RS04050	JPH1_RS08830
MAV_RS07360	MAH_RS06615	BBJ32_RS01635	KV38_RS06945	BS641_RS15985	BEP52_RS07165	BJP78_RS07165	BJP74_RS06705	DFS55_RS17805	DBO90_RS14005	EX350_RS15535	FCV17_RS19900	FCV16_RS12440	FCV18_RS03935	JPH1_RS08945
MAV_RS07950	MAH_RS07225	BBJ32_RS00970	KV38_RS07715	BS641_RS15385	BEP52_RS07810	BJP78_RS07795	BJP74_RS07335	DFS55_RS17075	DBO90_RS13335	EX350_RS14930	FCV17_RS19300	FCV16_RS11840	FCV18_RS03330	JPH1_RS09550
MAV_RS08270	MAH_RS07520	BBJ32_RS00675	KV38_RS08020	BS641_RS15080	BEP52_RS08110	BJP78_RS08095	BJP74_RS07635	DFS55_RS16765	DBO90_RS13040	EX350_RS14620	FCV17_RS18995	FCV16_RS11535	FCV18_RS03025	JPH1_RS09850
MAV_RS08315	MAH_RS07565	BBJ32_RS00630	KV38_RS08065	BS641_RS15035	BEP52_RS08155	BJP78_RS08140	BJP74_RS07680	DFS55_RS16720	DBO90_RS12995	EX350_RS14575	FCV17_RS18950	FCV16_RS11490	FCV18_RS02980	JPH1_RS09895
MAV_RS09955	MAH_RS08375	BBJ32_RS19145	KV38_RS08900	BS641_RS14190	BEP52_RS08990	BJP78_RS08975	BJP74_RS08525	DFS55_RS15905	DBO90_RS11740	EX350_RS13685	FCV17_RS18140	FCV16_RS10680	FCV18_RS02170	JPH1_RS10760
MAV_RS25935	MAH_RS23800	BBJ32_RS23245	KV38_RS08970	BS641_RS13965	BEP52_RS09085	BJP78_RS09080	BJP74_RS08625	DFS55_RS15680	DBO90_RS11660	EX350_RS13605	FCV17_RS18070	FCV16_RS10610	FCV18_RS02100	JPH1_RS10840
MAV_RS10055	MAH_RS08485	BBJ32_RS19240	KV38_RS08995	BS641_RS13940	BEP52_RS09110	BJP78_RS09105	BJP74_RS08650	DFS55_RS15655	DBO90_RS11635	EX350_RS13580	FCV17_RS18045	FCV16_RS10585	FCV18_RS02075	JPH1_RS10865
MAV_RS10090	MAH_RS08520	BBJ32_RS19275	KV38_RS09040	BS641_RS13895	BEP52_RS09155	BJP78_RS09150	BJP74_RS08695	DFS55_RS15610	DBO90_RS11590	EX350_RS13535	FCV17_RS18000	FCV16_RS10540	FCV18_RS02030	JPH1_RS10910
MAV_RS10245	MAH_RS08675	BBJ32_RS19430	KV38_RS09195	BS641_RS13740	BEP52_RS09310	BJP78_RS09305	BJP74_RS08850	DFS55_RS15455	DBO90_RS11435	EX350_RS13380	FCV17_RS17845	FCV16_RS10385	FCV18_RS01875	JPH1_RS11065
MAV_RS10280	MAH_RS08705	BBJ32_RS19460	KV38_RS09225	BS641_RS13710	BEP52_RS09340	BJP78_RS09335	BJP74_RS08880	DFS55_RS15425	DBO90_RS11405	EX350_RS13350	FCV17_RS17815	FCV16_RS10355	FCV18_RS01845	JPH1_RS11095
MAV_RS10285	MAH_RS08710	BBJ32_RS19465	KV38_RS09230	BS641_RS13705	BEP52_RS09345	BJP78_RS09340	BJP74_RS08885	DFS55_RS15420	DBO90_RS11400	EX350_RS13345	FCV17_RS17810	FCV16_RS10350	FCV18_RS01840	JPH1_RS11100
MAV_RS10365	MAH_RS14285	BBJ32_RS19535	KV38_RS09310	BS641_RS13565	BEP52_RS15395	BJP78_RS15645	BJP74_RS10575	DFS55_RS15320	DBO90_RS11320	EX350_RS13245	FCV17_RS17720	FCV16_RS10260	FCV18_RS01750	JPH1_RS11210
MAV_RS25950	MAH_RS23565	BBJ32_RS19675	KV38_RS09450	BS641_RS13425	BEP52_RS15255	BJP78_RS15505	BJP74_RS10715	DFS55_RS15180	DBO90_RS11180	EX350_RS13105	FCV17_RS17580	FCV16_RS10120	FCV18_RS01610	JPH1_RS11350
MAV_RS10950	MAH_RS13880	BBJ32_RS19945	KV38_RS09725	BS641_RS13155	BEP52_RS14985	BJP78_RS15235	BJP74_RS10985	DFS55_RS14910	DBO90_RS10910	EX350_RS12830	FCV17_RS17305	FCV16_RS09845	FCV18_RS01335	JPH1_RS11625
MAV_RS14510	MAH_RS11105	BBJ32_RS22570	KV38_RS12705	BS641_RS09730	BEP52_RS12170	BJP78_RS12155	BJP74_RS13775	DFS55_RS11955	DBO90_RS07000	EX350_RS09785	FCV17_RS14425	FCV16_RS06965	FCV18_RS23565	JPH1_RS14450
MAV_RS11100	MAH_RS13720	BBJ32_RS20095	KV38_RS09890	BS641_RS12970	BEP52_RS14825	BJP78_RS15075	BJP74_RS11145	DFS55_RS14750	DBO90_RS10750	EX350_RS12670	FCV17_RS17145	FCV16_RS09685	FCV18_RS01175	JPH1_RS11785
MAV_RS11160	MAH_RS13660	BBJ32_RS20155	KV38_RS09955	BS641_RS12910	BEP52_RS14755	BJP78_RS15005	BJP74_RS11215	DFS55_RS14685	DBO90_RS10685	EX350_RS12605	FCV17_RS17080	FCV16_RS09620	FCV18_RS01110	JPH1_RS11850
MAV_RS11220	MAH_RS13580	BBJ32_RS20215	KV38_RS10240	BS641_RS12690	BEP52_RS14670	BJP78_RS14925	BJP74_RS11295	DFS55_RS14550	DBO90_RS10625	EX350_RS12405	FCV17_RS17020	FCV16_RS09560	FCV18_RS01050	JPH1_RS11910
MAV_RS11315	MAH_RS13490	BBJ32_RS20325	KV38_RS10335	BS641_RS12600	BEP52_RS14575	BJP78_RS14830	BJP74_RS11390	DFS55_RS14455	DBO90_RS09305	EX350_RS12315	FCV17_RS16925	FCV16_RS09465	FCV18_RS00955	JPH1_RS12000
MAV_RS11545	MAH_RS13285	BBJ32_RS20530	KV38_RS10605	BS641_RS12355	BEP52_RS14320	BJP78_RS14575	BJP74_RS11645	DFS55_RS14205	DBO90_RS09085	EX350_RS12060	FCV17_RS16675	FCV16_RS09215	FCV18_RS00705	JPH1_RS12255
MAV_RS11555	MAH_RS13275	BBJ32_RS20540	KV38_RS10615	BS641_RS12345	BEP52_RS14310	BJP78_RS14565	BJP74_RS11655	DFS55_RS14195	DBO90_RS09075	EX350_RS12050	FCV17_RS16665	FCV16_RS09205	FCV18_RS00695	JPH1_RS12265
MAV_RS11760	MAH_RS13090	BBJ32_RS20720	KV38_RS10805	BS641_RS12145	BEP52_RS14130	BJP78_RS14385	BJP74_RS11835	DFS55_RS14005	DBO90_RS08890	EX350_RS11850	FCV17_RS16455	FCV16_RS08995	FCV18_RS25335	JPH1_RS12465
MAV_RS11935	MAH_RS12930	BBJ32_RS20880	KV38_RS10965	BS641_RS11985	BEP52_RS13970	BJP78_RS14225	BJP74_RS11995	DFS55_RS13845	DBO90_RS08730	EX350_RS11690	FCV17_RS16295	FCV16_RS08835	FCV18_RS25175	JPH1_RS12625
MAV_RS12980	MAH_RS12595	BBJ32_RS21100	KV38_RS11200	BS641_RS11275	BEP52_RS13670	BJP78_RS13655	BJP74_RS12270	DFS55_RS13460	DBO90_RS08495	EX350_RS11280	FCV17_RS15990	FCV16_RS08530	FCV18_RS24870	JPH1_RS12905
MAV_RS13035	MAH_RS12540	BBJ32_RS21155	KV38_RS11255	BS641_RS11220	BEP52_RS13615	BJP78_RS13600	BJP74_RS12325	DFS55_RS13405	DBO90_RS08440	EX350_RS11225	FCV17_RS15935	FCV16_RS08475	FCV18_RS24815	JPH1_RS12960
MAV_RS13055	MAH_RS12515	BBJ32_RS21185	KV38_RS11280	BS641_RS11195	BEP52_RS13590	BJP78_RS13575	BJP74_RS12355	DFS55_RS13380	DBO90_RS08415	EX350_RS11200	FCV17_RS15910	FCV16_RS08450	FCV18_RS24790	JPH1_RS12985
MAV_RS13100	MAH_RS12470	BBJ32_RS21230	KV38_RS11325	BS641_RS11150	BEP52_RS13545	BJP78_RS13530	BJP74_RS12400	DFS55_RS13335	DBO90_RS08370	EX350_RS11155	FCV17_RS15865	FCV16_RS08405	FCV18_RS24745	JPH1_RS13030
MAV_RS13275	MAH_RS12295	BBJ32_RS21420	KV38_RS11505	BS641_RS10975	BEP52_RS13365	BJP78_RS13350	BJP74_RS12580	DFS55_RS13155	DBO90_RS08170	EX350_RS10975	FCV17_RS15685	FCV16_RS08225	FCV18_RS24565	JPH1_RS13210
MAV_RS13280	MAH_RS12290	BBJ32_RS21425	KV38_RS11510	BS641_RS10970	BEP52_RS13360	BJP78_RS13345	BJP74_RS12585	DFS55_RS13150	DBO90_RS08165	EX350_RS10970	FCV17_RS15680	FCV16_RS08220	FCV18_RS24560	JPH1_RS13215
MAV_RS13420	MAH_RS12160	BBJ32_RS21575	KV38_RS11615	BS641_RS10805	BEP52_RS13225	BJP78_RS13210	BJP74_RS12720	DFS55_RS13045	DBO90_RS08005	EX350_RS10815	FCV17_RS15540	FCV16_RS08080	FCV18_RS24420	JPH1_RS13370
MAV_RS13490	MAH_RS12100	BBJ32_RS21635	KV38_RS11680	BS641_RS10735	BEP52_RS13160	BJP78_RS13145	BJP74_RS12785	DFS55_RS12980	DBO90_RS07940	EX350_RS10750	FCV17_RS15475	FCV16_RS08015	FCV18_RS24355	JPH1_RS13435
MAV_RS13565	MAH_RS12025	BBJ32_RS21710	KV38_RS11755	BS641_RS10660	BEP52_RS13085	BJP78_RS13070	BJP74_RS12860	DFS55_RS12905	DBO90_RS07865	EX350_RS10675	FCV17_RS15400	FCV16_RS07940	FCV18_RS24280	JPH1_RS13510
MAV_RS13575	MAH_RS12015	BBJ32_RS21720	KV38_RS11765	BS641_RS10650	BEP52_RS13075	BJP78_RS13060	BJP74_RS12870	DFS55_RS12895	DBO90_RS07855	EX350_RS10665	FCV17_RS15390	FCV16_RS07930	FCV18_RS24270	JPH1_RS13520
MAV_RS13600	MAH_RS11990	BBJ32_RS21745	KV38_RS11785	BS641_RS10630	BEP52_RS13050	BJP78_RS13035	BJP74_RS12895	DFS55_RS12875	DBO90_RS07830	EX350_RS10645	FCV17_RS15370	FCV16_RS07910	FCV18_RS24245	JPH1_RS13545
MAV_RS13855	MAH_RS11735	BBJ32_RS22000	KV38_RS12050	BS641_RS10370	BEP52_RS12795	BJP78_RS12780	BJP74_RS13150	DFS55_RS12615	DBO90_RS07575	EX350_RS10390	FCV17_RS15110	FCV16_RS07650	FCV18_RS23985	JPH1_RS13800
MAV_RS13870	MAH_RS11715	BBJ32_RS22015	KV38_RS12070	BS641_RS10355	BEP52_RS12780	BJP78_RS12765	BJP74_RS13165	DFS55_RS12595	DBO90_RS07560	EX350_RS10375	FCV17_RS15095	FCV16_RS07635	FCV18_RS23970	JPH1_RS13815
MAV_RS14120	MAH_RS11470	BBJ32_RS22250	KV38_RS12320	BS641_RS10105	BEP52_RS12535	BJP78_RS12520	BJP74_RS13410	DFS55_RS12335	DBO90_RS07325	EX350_RS10140	FCV17_RS14825	FCV16_RS07365	FCV18_RS23700	JPH1_RS14085
MAV_RS14445	MAH_RS11165	BBJ32_RS22450	KV38_RS12655	BS641_RS09775	BEP52_RS12230	BJP78_RS12215	BJP74_RS13715	DFS55_RS12000	DBO90_RS07125	EX350_RS09830	FCV17_RS14475	FCV16_RS07015	FCV18_RS23615	JPH1_RS14405
MAV_RS14475	MAH_RS11135	BBJ32_RS22480	KV38_RS12690	BS641_RS09745	BEP52_RS12195	BJP78_RS12180	BJP74_RS13750	DFS55_RS11970	DBO90_RS07095	EX350_RS09800	FCV17_RS14440	FCV16_RS06980	FCV18_RS23580	JPH1_RS14435
MAV_RS14690	MAH_RS10925	BBJ32_RS22695	KV38_RS13365	BS641_RS08890	BEP52_RS11620	BJP78_RS11605	BJP74_RS14325	DFS55_RS11225	DBO90_RS06875	EX350_RS09005	FCV17_RS13875	FCV16_RS06415	FCV18_RS22725	JPH1_RS15235
MAV_RS14730	MAH_RS10885	BBJ32_RS22735	KV38_RS13405	BS641_RS08850	BEP52_RS11580	BJP78_RS11565	BJP74_RS14365	DFS55_RS11185	DBO90_RS06835	EX350_RS08965	FCV17_RS13835	FCV16_RS06375	FCV18_RS22685	JPH1_RS15275
MAV_RS14910	MAH_RS10735	BBJ32_RS00120	KV38_RS13555	BS641_RS08700	BEP52_RS11430	BJP78_RS11415	BJP74_RS14510	DFS55_RS11005	DBO90_RS06675	EX350_RS08785	FCV17_RS13655	FCV16_RS06195	FCV18_RS22505	JPH1_RS15455
MAV_RS15135	MAH_RS10500	BBJ32_RS18200	KV38_RS13800	BS641_RS08455	BEP52_RS11180	BJP78_RS11165	BJP74_RS14760	DFS55_RS10760	DBO90_RS06415	EX350_RS08535	FCV17_RS13410	FCV16_RS05950	FCV18_RS22260	JPH1_RS15705
MAV_RS15640	MAH_RS10020	BBJ32_RS17725	KV38_RS14340	BS641_RS16680	BEP52_RS10685	BJP78_RS10670	BJP74_RS10395	DFS55_RS10230	DBO90_RS05915	EX350_RS08060	FCV17_RS12905	FCV16_RS05450	FCV18_RS21770	JPH1_RS16170
MAV_RS15670	MAH_RS09990	BBJ32_RS17695	KV38_RS14370	BS641_RS16710	BEP52_RS10655	BJP78_RS10640	BJP74_RS10365	DFS55_RS10200	DBO90_RS05885	EX350_RS08030	FCV17_RS12875	FCV16_RS05420	FCV18_RS21740	JPH1_RS16200
MAV_RS15880	MAH_RS09790	BBJ32_RS17485	KV38_RS14585	BS641_RS16915	BEP52_RS10450	BJP78_RS10435	BJP74_RS10160	DFS55_RS09995	DBO90_RS05665	EX350_RS07825	FCV17_RS12670	FCV16_RS05215	FCV18_RS21535	JPH1_RS16405
MAV_RS26115	MAH_RS23830	BBJ32_RS23150	KV38_RS14735	BS641_RS17065	BEP52_RS10300	BJP78_RS10285	BJP74_RS10000	DFS55_RS09845	DBO90_RS05515	EX350_RS07675	FCV17_RS12525	FCV16_RS05065	FCV18_RS21385	JPH1_RS16555
MAV_RS16275	MAH_RS09415	BBJ32_RS17110	KV38_RS14965	BS641_RS17310	BEP52_RS10070	BJP78_RS10055	BJP74_RS09770	DFS55_RS09605	DBO90_RS05285	EX350_RS07450	FCV17_RS12300	FCV16_RS04840	FCV18_RS21160	JPH1_RS16795
MAV_RS16300	MAH_RS09390	BBJ32_RS17085	KV38_RS14990	BS641_RS17335	BEP52_RS10045	BJP78_RS10030	BJP74_RS09745	DFS55_RS09580	DBO90_RS05260	EX350_RS07425	FCV17_RS12275	FCV16_RS04815	FCV18_RS21135	JPH1_RS16820
MAV_RS16435	MAH_RS09250	BBJ32_RS16955	KV38_RS15120	BS641_RS17470	BEP52_RS09910	BJP78_RS09895	BJP74_RS09610	DFS55_RS09450	DBO90_RS05130	EX350_RS07295	FCV17_RS12145	FCV16_RS04685	FCV18_RS21005	JPH1_RS16955
MAV_RS16775	MAH_RS08910	BBJ32_RS16585	KV38_RS15470	BS641_RS17990	BEP52_RS09540	BJP78_RS09535	BJP74_RS09090	DFS55_RS09105	DBO90_RS03230	EX350_RS06900	FCV17_RS20485	FCV16_RS13025	FCV18_RS04520	JPH1_RS17375
MAV_RS16815	MAH_RS08870	BBJ32_RS16545	KV38_RS15510	BS641_RS18030	BEP52_RS09500	BJP78_RS09495	BJP74_RS09050	DFS55_RS09065	DBO90_RS03190	EX350_RS06860	FCV17_RS20525	FCV16_RS13065	FCV18_RS04560	JPH1_RS17415
MAV_RS16925	MAH_RS14455	BBJ32_RS16315	KV38_RS15610	BS641_RS18155	BEP52_RS15555	BJP78_RS15805	BJP74_RS15245	DFS55_RS08965	DBO90_RS09375	EX350_RS06740	FCV17_RS20645	FCV16_RS13185	FCV18_RS04680	JPH1_RS17535
MAV_RS26120	MAH_RS23990	BBJ32_RS23125	KV38_RS15615	BS641_RS18170	BEP52_RS15560	BJP78_RS15810	BJP74_RS15250	DFS55_RS08960	DBO90_RS09380	EX350_RS06725	FCV17_RS20660	FCV16_RS13200	FCV18_RS04695	JPH1_RS17550
MAV_RS16970	MAH_RS14505	BBJ32_RS16270	KV38_RS15655	BS641_RS18215	BEP52_RS15605	BJP78_RS15855	BJP74_RS15295	DFS55_RS08920	DBO90_RS09420	EX350_RS06680	FCV17_RS20705	FCV16_RS13245	FCV18_RS04740	JPH1_RS17590
MAV_RS17020	MAH_RS14555	BBJ32_RS16220	KV38_RS15705	BS641_RS18265	BEP52_RS15655	BJP78_RS15905	BJP74_RS15345	DFS55_RS08870	DBO90_RS09470	EX350_RS06630	FCV17_RS20755	FCV16_RS13295	FCV18_RS04790	JPH1_RS17640
MAV_RS17035	MAH_RS14570	BBJ32_RS16205	KV38_RS15720	BS641_RS18280	BEP52_RS15670	BJP78_RS15920	BJP74_RS15360	DFS55_RS08855	DBO90_RS09485	EX350_RS06615	FCV17_RS20770	FCV16_RS13310	FCV18_RS04805	JPH1_RS17655
MAV_RS17045	MAH_RS14580	BBJ32_RS16195	KV38_RS15730	BS641_RS18290	BEP52_RS15680	BJP78_RS15930	BJP74_RS15370	DFS55_RS08845	DBO90_RS09495	EX350_RS06605	FCV17_RS20780	FCV16_RS13320	FCV18_RS04815	JPH1_RS17665
MAV_RS17665	MAH_RS15215	BBJ32_RS15600	KV38_RS16340	BS641_RS18890	BEP52_RS16330	BJP78_RS16580	BJP74_RS16020	DFS55_RS08235	DBO90_RS10105	EX350_RS05995	FCV17_RS21380	FCV16_RS13920	FCV18_RS05415	JPH1_RS18275
MAV_RS17985	MAH_RS15530	BBJ32_RS15285	KV38_RS16670	BS641_RS19215	BEP52_RS16660	BJP78_RS16915	BJP74_RS16350	DFS55_RS07905	DBO90_RS03090	EX350_RS05660	FCV17_RS21720	FCV16_RS14260	FCV18_RS05755	JPH1_RS18605
MAV_RS18065	MAH_RS15610	BBJ32_RS15205	KV38_RS16750	BS641_RS19295	BEP52_RS16740	BJP78_RS16995	BJP74_RS16430	DFS55_RS07825	DBO90_RS03010	EX350_RS05580	FCV17_RS21800	FCV16_RS14340	FCV18_RS05835	JPH1_RS18685
MAV_RS18260	MAH_RS15865	BBJ32_RS15100	KV38_RS17015	BS641_RS19410	BEP52_RS16845	BJP78_RS17245	BJP74_RS16535	DFS55_RS07565	DBO90_RS02905	EX350_RS05450	FCV17_RS21910	FCV16_RS14445	FCV18_RS05945	JPH1_RS18795
MAV_RS18665	MAH_RS16270	BBJ32_RS14695	KV38_RS17430	BS641_RS19835	BEP52_RS17260	BJP78_RS17660	BJP74_RS16950	DFS55_RS07150	DBO90_RS02495	EX350_RS05020	FCV17_RS22325	FCV16_RS14860	FCV18_RS06360	JPH1_RS19210
MAV_RS18960	MAH_RS16565	BBJ32_RS14405	KV38_RS17735	BS641_RS20135	BEP52_RS17560	BJP78_RS17960	BJP74_RS17250	DFS55_RS06855	DBO90_RS02200	EX350_RS04715	FCV17_RS22635	FCV16_RS15170	FCV18_RS06670	JPH1_RS19515
MAV_RS18985	MAH_RS16590	BBJ32_RS14380	KV38_RS17760	BS641_RS20160	BEP52_RS17585	BJP78_RS17985	BJP74_RS17275	DFS55_RS06830	DBO90_RS02175	EX350_RS04690	FCV17_RS22660	FCV16_RS15195	FCV18_RS06695	JPH1_RS19540
MAV_RS19055	MAH_RS16660	BBJ32_RS14310	KV38_RS18270	BS641_RS20230	BEP52_RS17655	BJP78_RS18055	BJP74_RS17345	DFS55_RS06760	DBO90_RS02105	EX350_RS04620	FCV17_RS22730	FCV16_RS15265	FCV18_RS06765	JPH1_RS19610
MAV_RS19095	MAH_RS16700	BBJ32_RS14270	KV38_RS18310	BS641_RS20270	BEP52_RS17695	BJP78_RS18095	BJP74_RS17385	DFS55_RS06720	DBO90_RS02065	EX350_RS04580	FCV17_RS22770	FCV16_RS15305	FCV18_RS06805	JPH1_RS19650
MAV_RS19120	MAH_RS16725	BBJ32_RS14245	KV38_RS18335	BS641_RS20295	BEP52_RS17720	BJP78_RS18120	BJP74_RS17410	DFS55_RS06695	DBO90_RS02040	EX350_RS04555	FCV17_RS22795	FCV16_RS15330	FCV18_RS06830	JPH1_RS19675
MAV_RS19145	MAH_RS16750	BBJ32_RS14220	KV38_RS18360	BS641_RS20320	BEP52_RS17745	BJP78_RS18145	BJP74_RS17435	DFS55_RS06670	DBO90_RS02015	EX350_RS04530	FCV17_RS22820	FCV16_RS15355	FCV18_RS06855	JPH1_RS19700
MAV_RS19155	MAH_RS16760	BBJ32_RS14210	KV38_RS18370	BS641_RS20350	BEP52_RS17755	BJP78_RS18155	BJP74_RS17445	DFS55_RS06665	DBO90_RS02005	EX350_RS04520	FCV17_RS22830	FCV16_RS15365	FCV18_RS06865	JPH1_RS19710
MAV_RS19305	MAH_RS16905	BBJ32_RS04040	KV38_RS18525	BS641_RS20505	BEP52_RS17910	BJP78_RS18310	BJP74_RS17600	DFS55_RS06510	DBO90_RS01790	EX350_RS04365	FCV17_RS22985	FCV16_RS15520	FCV18_RS07020	JPH1_RS19865
MAV_RS19530	MAH_RS17140	BBJ32_RS04265	KV38_RS18750	BS641_RS20730	BEP52_RS18140	BJP78_RS18540	BJP74_RS17830	DFS55_RS06285	DBO90_RS17675	EX350_RS04140	FCV17_RS23220	FCV16_RS15755	FCV18_RS07255	JPH1_RS20090
MAV_RS19540	MAH_RS17150	BBJ32_RS04275	KV38_RS18760	BS641_RS20740	BEP52_RS18150	BJP78_RS18550	BJP74_RS17840	DFS55_RS06275	DBO90_RS17685	EX350_RS04130	FCV17_RS23230	FCV16_RS15765	FCV18_RS07265	JPH1_RS20100
MAV_RS19710	MAH_RS17320	BBJ32_RS04445	KV38_RS18935	BS641_RS20910	BEP52_RS18325	BJP78_RS18725	BJP74_RS18015	DFS55_RS06100	DBO90_RS17855	EX350_RS03955	FCV17_RS23400	FCV16_RS15935	FCV18_RS07435	JPH1_RS20275
MAV_RS19745	MAH_RS17355	BBJ32_RS04480	KV38_RS18970	BS641_RS20945	BEP52_RS18360	BJP78_RS18760	BJP74_RS18050	DFS55_RS06065	DBO90_RS17890	EX350_RS03920	FCV17_RS23435	FCV16_RS15970	FCV18_RS07470	JPH1_RS20310
MAV_RS19980	MAH_RS17570	BBJ32_RS04720	KV38_RS19305	BS641_RS21170	BEP52_RS18625	BJP78_RS19025	BJP74_RS18315	DFS55_RS05635	DBO90_RS18120	EX350_RS03700	FCV17_RS23645	FCV16_RS16190	FCV18_RS07690	JPH1_RS20530
MAV_RS22155	MAH_RS19760	BBJ32_RS06905	KV38_RS21555	BS641_RS23405	BEP52_RS21010	BJP78_RS21405	BJP74_RS20645	DFS55_RS03390	DBO90_RS20335	EX350_RS01380	FCV17_RS01725	FCV16_RS18465	FCV18_RS09970	JPH1_RS22770
MAV_RS26250	MAH_RS24150	BBJ32_RS22900	KV38_RS21895	BS641_RS23760	BEP52_RS21350	BJP78_RS21750	BJP74_RS20985	DFS55_RS03055	DBO90_RS20660	EX350_RS01045	FCV17_RS02065	FCV16_RS18805	FCV18_RS10310	JPH1_RS23105
MAV_RS22640	MAH_RS20250	BBJ32_RS07390	KV38_RS22080	BS641_RS23950	BEP52_RS21535	BJP78_RS21935	BJP74_RS21170	DFS55_RS02855	DBO90_RS20845	EX350_RS00855	FCV17_RS02250	FCV16_RS18990	FCV18_RS10490	JPH1_RS23290
MAV_RS22665	MAH_RS20275	BBJ32_RS07415	KV38_RS22105	BS641_RS23975	BEP52_RS21560	BJP78_RS21960	BJP74_RS21195	DFS55_RS02830	DBO90_RS20870	EX350_RS00830	FCV17_RS02275	FCV16_RS19015	FCV18_RS10515	JPH1_RS23315
MAV_RS22710	MAH_RS20320	BBJ32_RS07460	KV38_RS22150	BS641_RS24020	BEP52_RS21605	BJP78_RS22005	BJP74_RS21240	DFS55_RS02785	DBO90_RS20915	EX350_RS00785	FCV17_RS02345	FCV16_RS19085	FCV18_RS10585	JPH1_RS23385
MAV_RS23065	MAH_RS20675	BBJ32_RS07815	KV38_RS22510	BS641_RS24380	BEP52_RS21965	BJP78_RS22365	BJP74_RS21600	DFS55_RS02415	DBO90_RS21275	EX350_RS00400	FCV17_RS02705	FCV16_RS19445	FCV18_RS10945	JPH1_RS23765
MAV_RS23445	MAH_RS21050	BBJ32_RS08195	KV38_RS22895	BS641_RS24805	BEP52_RS22355	BJP78_RS22760	BJP74_RS21995	DFS55_RS02030	DBO90_RS21660	EX350_RS25655	FCV17_RS03135	FCV16_RS19875	FCV18_RS11365	JPH1_RS24190
MAV_RS20595	MAH_RS18180	BBJ32_RS05345	KV38_RS19935	BS641_RS21800	BEP52_RS19415	BJP78_RS19660	BJP74_RS19050	DFS55_RS05005	DBO90_RS18765	EX350_RS03050	FCV17_RS24315	FCV16_RS16850	FCV18_RS08355	JPH1_RS21170
MAV_RS23480	MAH_RS21085	BBJ32_RS08230	KV38_RS22930	BS641_RS24840	BEP52_RS22390	BJP78_RS22795	BJP74_RS22030	DFS55_RS01995	DBO90_RS21695	EX350_RS25620	FCV17_RS03170	FCV16_RS19910	FCV18_RS11400	JPH1_RS24225
MAV_RS23680	MAH_RS21285	BBJ32_RS08435	KV38_RS23140	BS641_RS25050	BEP52_RS22605	BJP78_RS23010	BJP74_RS22240	DFS55_RS01780	DBO90_RS21910	EX350_RS25405	FCV17_RS03385	FCV16_RS20125	FCV18_RS11615	JPH1_RS24440
MAV_RS24030	MAH_RS21635	BBJ32_RS08785	KV38_RS23500	BS641_RS25405	BEP52_RS22930	BJP78_RS23335	BJP74_RS22565	DFS55_RS01420	DBO90_RS22265	EX350_RS25050	FCV17_RS03740	FCV16_RS20480	FCV18_RS11970	JPH1_RS24800
MAV_RS24035	MAH_RS21640	BBJ32_RS08790	KV38_RS23505	BS641_RS25410	BEP52_RS22935	BJP78_RS23340	BJP74_RS22570	DFS55_RS01415	DBO90_RS22270	EX350_RS25045	FCV17_RS03745	FCV16_RS20485	FCV18_RS11975	JPH1_RS24805
MAV_RS24870	MAH_RS22100	BBJ32_RS09255	KV38_RS23930	BS641_RS25835	BEP52_RS23405	BJP78_RS23810	BJP74_RS23040	DFS55_RS00990	DBO90_RS22750	EX350_RS24620	FCV17_RS04170	FCV16_RS20910	FCV18_RS12400	JPH1_RS25230
MAV_RS25140	MAH_RS22365	BBJ32_RS09530	KV38_RS24215	BS641_RS26120	BEP52_RS23685	BJP78_RS24090	BJP74_RS23320	DFS55_RS00705	DBO90_RS23035	EX350_RS24335	FCV17_RS04450	FCV16_RS21190	FCV18_RS12680	JPH1_RS25510
MAV_RS25180	MAH_RS22405	BBJ32_RS09570	KV38_RS24255	BS641_RS26160	BEP52_RS23725	BJP78_RS24130	BJP74_RS23360	DFS55_RS00665	DBO90_RS23080	EX350_RS24295	FCV17_RS04490	FCV16_RS21230	FCV18_RS12720	JPH1_RS25550
MAV_RS25375	MAH_RS22600	BBJ32_RS09765	KV38_RS24450	BS641_RS26660	BEP52_RS23920	BJP78_RS24325	BJP74_RS23555	DFS55_RS00470	DBO90_RS23275	EX350_RS24100	FCV17_RS04720	FCV16_RS21435	FCV18_RS12925	JPH1_RS25745
MAV_RS00950	MAH_RS01035	BBJ32_RS11270	KV38_RS00935	BS641_RS01000	BEP52_RS00935	BJP78_RS00945	BJP74_RS00920	DFS55_RS23905	DBO90_RS03795	EX350_RS22840	FCV17_RS05885	FCV16_RS22605	FCV18_RS14090	JPH1_RS00945
MAV_RS07900	MAH_RS07175	BBJ32_RS01020	KV38_RS07555	BS641_RS15435	BEP52_RS07760	BJP78_RS07745	BJP74_RS07285	DFS55_RS17220	DBO90_RS13385	EX350_RS14980	FCV17_RS19350	FCV16_RS11890	FCV18_RS03380	JPH1_RS09500
MAV_RS20040	MAH_RS17630	BBJ32_RS04780	KV38_RS19370	BS641_RS21230	BEP52_RS18690	BJP78_RS19090	BJP74_RS18380	DFS55_RS05570	DBO90_RS18185	EX350_RS03635	FCV17_RS23710	FCV16_RS16255	FCV18_RS07755	JPH1_RS20595
MAV_RS15685	MAH_RS09975	BBJ32_RS17680	KV38_RS14390	BS641_RS16730	BEP52_RS10635	BJP78_RS10620	BJP74_RS10345	DFS55_RS10180	DBO90_RS05865	EX350_RS08010	FCV17_RS12855	FCV16_RS05400	FCV18_RS21720	JPH1_RS16220
MAV_RS00020	MAH_RS00015	BBJ32_RS09900	KV38_RS00020	BS641_RS00015	BEP52_RS00015	BJP78_RS00015	BJP74_RS00015	DFS55_RS00015	DBO90_RS00015	EX350_RS23950	FCV17_RS04865	FCV16_RS21580	FCV18_RS13070	JPH1_RS00015
MAV_RS00025	MAH_RS00020	BBJ32_RS09905	KV38_RS00025	BS641_RS00020	BEP52_RS00020	BJP78_RS00020	BJP74_RS00020	DFS55_RS00020	DBO90_RS00020	EX350_RS23945	FCV17_RS04870	FCV16_RS21585	FCV18_RS13075	JPH1_RS00020
MAV_RS00190	MAH_RS00300	BBJ32_RS12030	KV38_RS00195	BS641_RS00215	BEP52_RS00195	BJP78_RS00205	BJP74_RS00180	DFS55_RS00195	DBO90_RS00200	EX350_RS23580	FCV17_RS05160	FCV16_RS21875	FCV18_RS13370	JPH1_RS00215
MAV_RS00215	MAH_RS00325	BBJ32_RS12005	KV38_RS00220	BS641_RS00240	BEP52_RS00220	BJP78_RS00230	BJP74_RS00205	DFS55_RS00220	DBO90_RS00225	EX350_RS23555	FCV17_RS05185	FCV16_RS21900	FCV18_RS13395	JPH1_RS00240
MAV_RS00250	MAH_RS00360	BBJ32_RS11970	KV38_RS00255	BS641_RS00275	BEP52_RS00255	BJP78_RS00265	BJP74_RS00240	DFS55_RS00255	DBO90_RS00260	EX350_RS23520	FCV17_RS05220	FCV16_RS21935	FCV18_RS13430	JPH1_RS00275
MAV_RS00390	MAH_RS00500	BBJ32_RS11830	KV38_RS00395	BS641_RS00420	BEP52_RS00395	BJP78_RS00405	BJP74_RS00380	DFS55_RS00395	DBO90_RS00400	EX350_RS23380	FCV17_RS05355	FCV16_RS22070	FCV18_RS13560	JPH1_RS00415
MAV_RS00485	MAH_RS00600	BBJ32_RS11730	KV38_RS00500	BS641_RS00515	BEP52_RS00500	BJP78_RS00510	BJP74_RS00485	DFS55_RS24365	DBO90_RS00505	EX350_RS23275	FCV17_RS05450	FCV16_RS22165	FCV18_RS13655	JPH1_RS00510
MAV_RS00680	MAH_RS00765	BBJ32_RS11540	KV38_RS00665	BS641_RS00715	BEP52_RS00665	BJP78_RS00675	BJP74_RS00650	DFS55_RS24175	DBO90_RS00695	EX350_RS23110	FCV17_RS05615	FCV16_RS22330	FCV18_RS13820	JPH1_RS00675
MAV_RS00690	MAH_RS00775	BBJ32_RS11530	KV38_RS00675	BS641_RS00725	BEP52_RS00675	BJP78_RS00685	BJP74_RS00660	DFS55_RS24165	DBO90_RS00705	EX350_RS23100	FCV17_RS05625	FCV16_RS22340	FCV18_RS13830	JPH1_RS00685
MAV_RS04070	MAH_RS23690	BBJ32_RS13280	KV38_RS03635	BS641_RS05260	BEP52_RS03505	BJP78_RS03505	BJP74_RS03475	DFS55_RS21170	DBO90_RS17205	EX350_RS18890	FCV17_RS08935	FCV16_RS01470	FCV18_RS17695	JPH1_RS05275
MAV_RS21725	MAH_RS19310	BBJ32_RS06475	KV38_RS21100	BS641_RS22955	BEP52_RS20550	BJP78_RS20950	BJP74_RS20190	DFS55_RS03845	DBO90_RS19905	EX350_RS01850	FCV17_RS01295	FCV16_RS18035	FCV18_RS09540	JPH1_RS22340
MAV_RS18305	MAH_RS15910	BBJ32_RS15055	KV38_RS17065	BS641_RS19460	BEP52_RS16895	BJP78_RS17295	BJP74_RS16585	DFS55_RS07515	DBO90_RS02855	EX350_RS05400	FCV17_RS21960	FCV16_RS14495	FCV18_RS05995	JPH1_RS18845
MAV_RS20765	MAH_RS18345	BBJ32_RS05515	KV38_RS20110	BS641_RS21965	BEP52_RS19580	BJP78_RS19825	BJP74_RS19215	DFS55_RS04835	DBO90_RS18940	EX350_RS02880	FCV17_RS24485	FCV16_RS17020	FCV18_RS08525	JPH1_RS21340
MAV_RS21510	MAH_RS19095	BBJ32_RS06260	KV38_RS20865	BS641_RS22740	BEP52_RS20335	BJP78_RS20735	BJP74_RS19975	DFS55_RS04080	DBO90_RS19690	EX350_RS02085	FCV17_RS01060	FCV16_RS17800	FCV18_RS09305	JPH1_RS22125
MAV_RS05270	MAH_RS04690	BBJ32_RS03540	KV38_RS04900	BS641_RS06470	BEP52_RS05215	BJP78_RS05210	BJP74_RS04755	DFS55_RS19960	DBO90_RS15980	EX350_RS17670	FCV17_RS10155	FCV16_RS02690	FCV18_RS18910	JPH1_RS06505
MAV_RS17900	MAH_RS15445	BBJ32_RS15370	KV38_RS16580	BS641_RS19125	BEP52_RS16570	BJP78_RS16825	BJP74_RS16260	DFS55_RS07995	DBO90_RS10350	EX350_RS05750	FCV17_RS21630	FCV16_RS14170	FCV18_RS05665	JPH1_RS18515
MAV_RS04905	MAH_RS04325	BBJ32_RS14115	KV38_RS04525	BS641_RS06100	BEP52_RS04395	BJP78_RS04400	BJP74_RS04365	DFS55_RS20330	DBO90_RS16365	EX350_RS18045	FCV17_RS09775	FCV16_RS02310	FCV18_RS18535	JPH1_RS06130
MAV_RS21445	MAH_RS19030	BBJ32_RS06195	KV38_RS20800	BS641_RS22675	BEP52_RS20270	BJP78_RS20670	BJP74_RS19910	DFS55_RS04145	DBO90_RS19625	EX350_RS02150	FCV17_RS00995	FCV16_RS17735	FCV18_RS09240	JPH1_RS22060
MAV_RS13765	MAH_RS11825	BBJ32_RS21910	KV38_RS11960	BS641_RS10460	BEP52_RS12885	BJP78_RS12870	BJP74_RS13060	DFS55_RS12705	DBO90_RS07665	EX350_RS10480	FCV17_RS15200	FCV16_RS07740	FCV18_RS24075	JPH1_RS13710
MAV_RS07960	MAH_RS07235	BBJ32_RS00960	KV38_RS07725	BS641_RS15375	BEP52_RS07820	BJP78_RS07805	BJP74_RS07345	DFS55_RS17065	DBO90_RS13325	EX350_RS14920	FCV17_RS19290	FCV16_RS11830	FCV18_RS03320	JPH1_RS09560
MAV_RS16760	MAH_RS08925	BBJ32_RS16600	KV38_RS15455	BS641_RS17975	BEP52_RS09555	BJP78_RS09550	BJP74_RS09105	DFS55_RS09120	DBO90_RS03245	EX350_RS06915	FCV17_RS20470	FCV16_RS13010	FCV18_RS04505	JPH1_RS17360
MAV_RS16655	MAH_RS09030	BBJ32_RS16705	KV38_RS15350	BS641_RS17870	BEP52_RS09660	BJP78_RS09655	BJP74_RS09210	DFS55_RS09225	DBO90_RS03350	EX350_RS07020	FCV17_RS20365	FCV16_RS12905	FCV18_RS04400	JPH1_RS17255
MAV_RS00725	MAH_RS00810	BBJ32_RS11495	KV38_RS00710	BS641_RS00765	BEP52_RS00710	BJP78_RS00720	BJP74_RS00695	DFS55_RS24130	DBO90_RS03565	EX350_RS23065	FCV17_RS05660	FCV16_RS22375	FCV18_RS13865	JPH1_RS00720
MAV_RS20670	MAH_RS18255	BBJ32_RS05420	KV38_RS20015	BS641_RS21875	BEP52_RS19490	BJP78_RS19735	BJP74_RS19125	DFS55_RS04930	DBO90_RS18840	EX350_RS02975	FCV17_RS24390	FCV16_RS16925	FCV18_RS08430	JPH1_RS21245
MAV_RS04375	MAH_RS03740	BBJ32_RS13585	KV38_RS03940	BS641_RS05565	BEP52_RS03810	BJP78_RS03810	BJP74_RS03780	DFS55_RS20865	DBO90_RS16895	EX350_RS18580	FCV17_RS09240	FCV16_RS01775	FCV18_RS18000	JPH1_RS05585
MAV_RS16735	MAH_RS08950	BBJ32_RS16625	KV38_RS15430	BS641_RS17950	BEP52_RS09580	BJP78_RS09575	BJP74_RS09130	DFS55_RS09145	DBO90_RS03270	EX350_RS06940	FCV17_RS20445	FCV16_RS12985	FCV18_RS04480	JPH1_RS17335
MAV_RS15810	MAH_RS09860	BBJ32_RS17555	KV38_RS14515	BS641_RS16845	BEP52_RS10520	BJP78_RS10505	BJP74_RS10230	DFS55_RS10065	DBO90_RS05735	EX350_RS07895	FCV17_RS12740	FCV16_RS05285	FCV18_RS21605	JPH1_RS16335
MAV_RS20520	MAH_RS18110	BBJ32_RS05275	KV38_RS19865	BS641_RS21725	BEP52_RS19185	BJP78_RS19585	BJP74_RS18875	DFS55_RS05075	DBO90_RS18695	EX350_RS03140	FCV17_RS24245	FCV16_RS16780	FCV18_RS08285	JPH1_RS21090
MAV_RS15840	MAH_RS09830	BBJ32_RS17525	KV38_RS14545	BS641_RS16875	BEP52_RS10490	BJP78_RS10475	BJP74_RS10200	DFS55_RS10035	DBO90_RS05705	EX350_RS07865	FCV17_RS12710	FCV16_RS05255	FCV18_RS21575	JPH1_RS16365
MAV_RS02085	MAH_RS01960	BBJ32_RS10335	KV38_RS02020	BS641_RS01965	BEP52_RS01910	BJP78_RS01915	BJP74_RS01895	DFS55_RS22740	DBO90_RS04740	EX350_RS21760	FCV17_RS06875	FCV16_RS23595	FCV18_RS15080	JPH1_RS01915
MAV_RS18895	MAH_RS16505	BBJ32_RS14465	KV38_RS17675	BS641_RS20075	BEP52_RS17500	BJP78_RS17900	BJP74_RS17190	DFS55_RS06910	DBO90_RS02260	EX350_RS04775	FCV17_RS22575	FCV16_RS15110	FCV18_RS06610	JPH1_RS19455
MAV_RS11170	MAH_RS13650	BBJ32_RS20165	KV38_RS09965	BS641_RS12900	BEP52_RS14745	BJP78_RS14995	BJP74_RS11225	DFS55_RS14675	DBO90_RS10675	EX350_RS12595	FCV17_RS17070	FCV16_RS09610	FCV18_RS01100	JPH1_RS11860
MAV_RS20205	MAH_RS17795	BBJ32_RS04955	KV38_RS19540	BS641_RS21400	BEP52_RS18860	BJP78_RS19260	BJP74_RS18550	DFS55_RS05400	DBO90_RS18365	EX350_RS03465	FCV17_RS23920	FCV16_RS16460	FCV18_RS07960	JPH1_RS20765
MAV_RS00730	MAH_RS00815	BBJ32_RS11490	KV38_RS00715	BS641_RS00770	BEP52_RS00715	BJP78_RS00725	BJP74_RS00700	DFS55_RS24125	DBO90_RS03570	EX350_RS23060	FCV17_RS05665	FCV16_RS22380	FCV18_RS13870	JPH1_RS00725
MAV_RS07440	MAH_RS06695	BBJ32_RS01555	KV38_RS07025	BS641_RS15905	BEP52_RS07245	BJP78_RS07245	BJP74_RS06785	DFS55_RS17725	DBO90_RS13925	EX350_RS15455	FCV17_RS19820	FCV16_RS12360	FCV18_RS03855	JPH1_RS09025
MAV_RS18495	MAH_RS16100	BBJ32_RS14865	KV38_RS17255	BS641_RS19650	BEP52_RS17090	BJP78_RS17485	BJP74_RS16780	DFS55_RS07325	DBO90_RS02665	EX350_RS05195	FCV17_RS22150	FCV16_RS14685	FCV18_RS06185	JPH1_RS19035
MAV_RS01040	MAH_RS01125	BBJ32_RS11180	KV38_RS01030	BS641_RS01095	BEP52_RS01025	BJP78_RS01035	BJP74_RS01010	DFS55_RS23815	DBO90_RS03890	EX350_RS22750	FCV17_RS05975	FCV16_RS22695	FCV18_RS14180	JPH1_RS01035
MAV_RS21425	MAH_RS19010	BBJ32_RS06175	KV38_RS20780	BS641_RS22655	BEP52_RS20250	BJP78_RS20650	BJP74_RS19890	DFS55_RS04165	DBO90_RS19605	EX350_RS02170	FCV17_RS00975	FCV16_RS17715	FCV18_RS09220	JPH1_RS22040
MAV_RS23765	MAH_RS21370	BBJ32_RS08520	KV38_RS23225	BS641_RS25135	BEP52_RS22690	BJP78_RS23095	BJP74_RS22325	DFS55_RS01695	DBO90_RS21995	EX350_RS25320	FCV17_RS03470	FCV16_RS20210	FCV18_RS11700	JPH1_RS24525
MAV_RS23105	MAH_RS20715	BBJ32_RS07855	KV38_RS22550	BS641_RS24420	BEP52_RS22005	BJP78_RS22405	BJP74_RS21640	DFS55_RS02375	DBO90_RS21315	EX350_RS00360	FCV17_RS02745	FCV16_RS19485	FCV18_RS10985	JPH1_RS23805
MAV_RS08275	MAH_RS07525	BBJ32_RS00670	KV38_RS08025	BS641_RS15075	BEP52_RS08115	BJP78_RS08100	BJP74_RS07640	DFS55_RS16760	DBO90_RS13035	EX350_RS14615	FCV17_RS18990	FCV16_RS11530	FCV18_RS03020	JPH1_RS09855
MAV_RS11225	MAH_RS13575	BBJ32_RS20220	KV38_RS10245	BS641_RS12685	BEP52_RS14665	BJP78_RS14920	BJP74_RS11300	DFS55_RS14545	DBO90_RS10620	EX350_RS12400	FCV17_RS17015	FCV16_RS09555	FCV18_RS01045	JPH1_RS11915
MAV_RS19260	MAH_RS16865	BBJ32_RS03995	KV38_RS18480	BS641_RS20460	BEP52_RS17865	BJP78_RS18265	BJP74_RS17555	DFS55_RS06555	DBO90_RS01835	EX350_RS04410	FCV17_RS22940	FCV16_RS15475	FCV18_RS06975	JPH1_RS19820
MAV_RS16520	MAH_RS09165	BBJ32_RS16885	KV38_RS15210	BS641_RS17560	BEP52_RS09820	BJP78_RS09805	BJP74_RS09520	DFS55_RS09360	DBO90_RS05060	EX350_RS07155	FCV17_RS12055	FCV16_RS04595	FCV18_RS20915	JPH1_RS17105
MAV_RS03465	MAH_RS03105	BBJ32_RS12960	KV38_RS03190	BS641_RS03490	BEP52_RS03085	BJP78_RS03090	BJP74_RS03060	DFS55_RS21560	DBO90_RS17645	EX350_RS20585	FCV17_RS08045	FCV16_RS24765	FCV18_RS16250	JPH1_RS03090
MAV_RS05505	MAH_RS05010	BBJ32_RS03245	KV38_RS05235	BS641_RS06780	BEP52_RS05530	BJP78_RS05525	BJP74_RS05070	DFS55_RS19635	DBO90_RS15675	EX350_RS17335	FCV17_RS10400	FCV16_RS02940	FCV18_RS19250	JPH1_RS06815
MAV_RS21375	MAH_RS18960	BBJ32_RS06125	KV38_RS20730	BS641_RS22605	BEP52_RS20200	BJP78_RS20450	BJP74_RS19840	DFS55_RS04215	DBO90_RS19555	EX350_RS02220	FCV17_RS00925	FCV16_RS17665	FCV18_RS09170	JPH1_RS21990
MAV_RS26170	MAH_RS24060	BBJ32_RS23080	KV38_RS17035	BS641_RS19430	BEP52_RS16865	BJP78_RS17265	BJP74_RS16555	DFS55_RS07545	DBO90_RS02885	EX350_RS05430	FCV17_RS21930	FCV16_RS14465	FCV18_RS05965	JPH1_RS18815
MAV_RS04195	MAH_RS03560	BBJ32_RS13405	KV38_RS03760	BS641_RS05385	BEP52_RS03630	BJP78_RS03630	BJP74_RS03600	DFS55_RS21045	DBO90_RS17075	EX350_RS18760	FCV17_RS09060	FCV16_RS01595	FCV18_RS17820	JPH1_RS05405
MAV_RS20360	MAH_RS17950	BBJ32_RS05115	KV38_RS19700	BS641_RS21560	BEP52_RS19020	BJP78_RS19420	BJP74_RS18710	DFS55_RS05240	DBO90_RS18530	EX350_RS03305	FCV17_RS24080	FCV16_RS16615	FCV18_RS08120	JPH1_RS20925
MAV_RS17115	MAH_RS14645	BBJ32_RS16135	KV38_RS15790	BS641_RS18350	BEP52_RS15740	BJP78_RS15990	BJP74_RS15430	DFS55_RS08785	DBO90_RS09555	EX350_RS06540	FCV17_RS20840	FCV16_RS13380	FCV18_RS04875	JPH1_RS17730
MAV_RS21035	MAH_RS18620	BBJ32_RS05785	KV38_RS20385	BS641_RS22260	BEP52_RS19855	BJP78_RS20105	BJP74_RS19495	DFS55_RS04560	DBO90_RS19210	EX350_RS02565	FCV17_RS00580	FCV16_RS17320	FCV18_RS08825	JPH1_RS21645
MAV_RS11505	MAH_RS13310	BBJ32_RS20505	KV38_RS10515	BS641_RS12420	BEP52_RS14395	BJP78_RS14650	BJP74_RS11570	DFS55_RS14275	DBO90_RS09125	EX350_RS12135	FCV17_RS16745	FCV16_RS09285	FCV18_RS00775	JPH1_RS12180
MAV_RS23330	MAH_RS20935	BBJ32_RS08080	KV38_RS22780	BS641_RS24690	BEP52_RS22240	BJP78_RS22640	BJP74_RS21880	DFS55_RS02145	DBO90_RS21545	EX350_RS00085	FCV17_RS03020	FCV16_RS19760	FCV18_RS11250	JPH1_RS24075
MAV_RS00770	MAH_RS00855	BBJ32_RS11450	KV38_RS00755	BS641_RS00810	BEP52_RS00755	BJP78_RS00765	BJP74_RS00740	DFS55_RS24085	DBO90_RS03615	EX350_RS23020	FCV17_RS05705	FCV16_RS22420	FCV18_RS13910	JPH1_RS00765
MAV_RS21680	MAH_RS19265	BBJ32_RS06430	KV38_RS21055	BS641_RS22910	BEP52_RS20505	BJP78_RS20905	BJP74_RS20145	DFS55_RS03890	DBO90_RS19860	EX350_RS01895	FCV17_RS01250	FCV16_RS17990	FCV18_RS09495	JPH1_RS22295
MAV_RS21465	MAH_RS19050	BBJ32_RS06215	KV38_RS20820	BS641_RS22695	BEP52_RS20290	BJP78_RS20690	BJP74_RS19930	DFS55_RS04125	DBO90_RS19645	EX350_RS02130	FCV17_RS01015	FCV16_RS17755	FCV18_RS09260	JPH1_RS22080
MAV_RS00875	MAH_RS00960	BBJ32_RS11345	KV38_RS00860	BS641_RS00925	BEP52_RS00860	BJP78_RS00870	BJP74_RS00845	DFS55_RS23980	DBO90_RS03720	EX350_RS22915	FCV17_RS05810	FCV16_RS22530	FCV18_RS14015	JPH1_RS00870
MAV_RS21565	MAH_RS19150	BBJ32_RS06315	KV38_RS20920	BS641_RS22795	BEP52_RS20390	BJP78_RS20790	BJP74_RS20030	DFS55_RS04025	DBO90_RS19745	EX350_RS02030	FCV17_RS01115	FCV16_RS17855	FCV18_RS09360	JPH1_RS22180
MAV_RS22615	MAH_RS20225	BBJ32_RS07365	KV38_RS22055	BS641_RS23925	BEP52_RS21510	BJP78_RS21910	BJP74_RS21145	DFS55_RS02880	DBO90_RS20820	EX350_RS00880	FCV17_RS02225	FCV16_RS18965	FCV18_RS10470	JPH1_RS23265
MAV_RS07285	MAH_RS06540	BBJ32_RS01710	KV38_RS06855	BS641_RS16085	BEP52_RS07090	BJP78_RS07090	BJP74_RS06630	DFS55_RS17905	DBO90_RS14080	EX350_RS15625	FCV17_RS19975	FCV16_RS12515	FCV18_RS04010	JPH1_RS08870
MAV_RS07920	MAH_RS07195	BBJ32_RS01000	KV38_RS07685	BS641_RS15415	BEP52_RS07780	BJP78_RS07765	BJP74_RS07305	DFS55_RS17105	DBO90_RS13365	EX350_RS14960	FCV17_RS19330	FCV16_RS11870	FCV18_RS03360	JPH1_RS09520
MAV_RS23300	MAH_RS20905	BBJ32_RS08050	KV38_RS22745	BS641_RS24655	BEP52_RS22205	BJP78_RS22605	BJP74_RS21845	DFS55_RS02180	DBO90_RS21510	EX350_RS00120	FCV17_RS02985	FCV16_RS19725	FCV18_RS11215	JPH1_RS24040
MAV_RS06540	MAH_RS06020	BBJ32_RS02235	KV38_RS06275	BS641_RS07815	BEP52_RS06565	BJP78_RS06560	BJP74_RS06105	DFS55_RS18590	DBO90_RS14635	EX350_RS16295	FCV17_RS11485	FCV16_RS04025	FCV18_RS20345	JPH1_RS07895
MAV_RS26240	MAH_RS24140	BBJ32_RS22890	KV38_RS21760	BS641_RS23625	BEP52_RS21215	BJP78_RS21610	BJP74_RS20850	DFS55_RS03190	DBO90_RS20525	EX350_RS01180	FCV17_RS01930	FCV16_RS18670	FCV18_RS10175	JPH1_RS22970
MAV_RS00785	MAH_RS00870	BBJ32_RS11435	KV38_RS00770	BS641_RS00825	BEP52_RS00770	BJP78_RS00780	BJP74_RS00755	DFS55_RS24070	DBO90_RS03630	EX350_RS23005	FCV17_RS05720	FCV16_RS22435	FCV18_RS13925	JPH1_RS00780
MAV_RS19340	MAH_RS16940	BBJ32_RS04075	KV38_RS18560	BS641_RS20540	BEP52_RS17945	BJP78_RS18345	BJP74_RS17635	DFS55_RS06475	DBO90_RS01755	EX350_RS04330	FCV17_RS23020	FCV16_RS15555	FCV18_RS07055	JPH1_RS19900
MAV_RS10350	MAH_RS14300	BBJ32_RS19525	KV38_RS09295	BS641_RS13580	BEP52_RS15410	BJP78_RS15660	BJP74_RS10560	DFS55_RS15335	DBO90_RS11335	EX350_RS13280	FCV17_RS17735	FCV16_RS10275	FCV18_RS01765	JPH1_RS11195
MAV_RS26225	MAH_RS24115	BBJ32_RS22880	KV38_RS20465	BS641_RS22340	BEP52_RS19935	BJP78_RS20185	BJP74_RS19575	DFS55_RS04480	DBO90_RS19290	EX350_RS02485	FCV17_RS00660	FCV16_RS17400	FCV18_RS08905	JPH1_RS21725
MAV_RS21110	MAH_RS18695	BBJ32_RS05860	KV38_RS20460	BS641_RS22335	BEP52_RS19930	BJP78_RS20180	BJP74_RS19570	DFS55_RS04485	DBO90_RS19285	EX350_RS02490	FCV17_RS00655	FCV16_RS17395	FCV18_RS08900	JPH1_RS21720
MAV_RS03710	MAH_RS03355	BBJ32_RS13205	KV38_RS03435	BS641_RS03735	BEP52_RS03335	BJP78_RS03340	BJP74_RS03310	DFS55_RS21310	DBO90_RS17390	EX350_RS20335	FCV17_RS08290	FCV16_RS25010	FCV18_RS16495	JPH1_RS03340
MAV_RS09920	MAH_RS08340	BBJ32_RS19110	KV38_RS08865	BS641_RS14230	BEP52_RS08955	BJP78_RS08940	BJP74_RS08490	DFS55_RS15940	DBO90_RS11775	EX350_RS13720	FCV17_RS18175	FCV16_RS10715	FCV18_RS02205	JPH1_RS10720
MAV_RS01855	MAH_RS01720	BBJ32_RS10565	KV38_RS01780	BS641_RS01730	BEP52_RS01660	BJP78_RS01665	BJP74_RS01645	DFS55_RS22985	DBO90_RS04505	EX350_RS22015	FCV17_RS06630	FCV16_RS23350	FCV18_RS14835	JPH1_RS01670
MAV_RS02900	MAH_RS02605	BBJ32_RS12455	KV38_RS02680	BS641_RS02625	BEP52_RS02570	BJP78_RS02575	BJP74_RS02555	DFS55_RS22070	DBO90_RS01080	EX350_RS21090	FCV17_RS07535	FCV16_RS24255	FCV18_RS15740	JPH1_RS02585
MAV_RS17195	MAH_RS14720	BBJ32_RS16060	KV38_RS15865	BS641_RS18425	BEP52_RS15815	BJP78_RS16065	BJP74_RS15505	DFS55_RS08710	DBO90_RS09630	EX350_RS06465	FCV17_RS20915	FCV16_RS13455	FCV18_RS04950	JPH1_RS17805
MAV_RS00245	MAH_RS00355	BBJ32_RS11975	KV38_RS00250	BS641_RS00270	BEP52_RS00250	BJP78_RS00260	BJP74_RS00235	DFS55_RS00250	DBO90_RS00255	EX350_RS23525	FCV17_RS05215	FCV16_RS21930	FCV18_RS13425	JPH1_RS00270
MAV_RS00825	MAH_RS00910	BBJ32_RS11395	KV38_RS00810	BS641_RS00875	BEP52_RS00810	BJP78_RS00820	BJP74_RS00795	DFS55_RS24030	DBO90_RS03670	EX350_RS22965	FCV17_RS05760	FCV16_RS22480	FCV18_RS13965	JPH1_RS00820
MAV_RS18140	MAH_RS15685	BBJ32_RS15130	KV38_RS16825	BS641_RS19370	BEP52_RS16815	BJP78_RS17070	BJP74_RS16505	DFS55_RS07750	DBO90_RS02935	EX350_RS05500	FCV17_RS21875	FCV16_RS14410	FCV18_RS05910	JPH1_RS18760
MAV_RS26130	MAH_RS24000	BBJ32_RS23110	KV38_RS15990	BS641_RS18545	BEP52_RS15940	BJP78_RS16190	BJP74_RS15630	DFS55_RS08585	DBO90_RS09755	EX350_RS06340	FCV17_RS21035	FCV16_RS13575	FCV18_RS05070	JPH1_RS17925
MAV_RS15150	MAH_RS10485	BBJ32_RS18185	KV38_RS13815	BS641_RS08440	BEP52_RS11165	BJP78_RS11150	BJP74_RS14775	DFS55_RS10745	DBO90_RS06400	EX350_RS08520	FCV17_RS13395	FCV16_RS05935	FCV18_RS22245	JPH1_RS15720
MAV_RS21380	MAH_RS18965	BBJ32_RS06130	KV38_RS20735	BS641_RS22610	BEP52_RS20205	BJP78_RS20455	BJP74_RS19845	DFS55_RS04210	DBO90_RS19560	EX350_RS02215	FCV17_RS00930	FCV16_RS17670	FCV18_RS09175	JPH1_RS21995
MAV_RS17895	MAH_RS15440	BBJ32_RS15375	KV38_RS16575	BS641_RS19120	BEP52_RS16565	BJP78_RS16820	BJP74_RS16255	DFS55_RS08000	DBO90_RS10345	EX350_RS05755	FCV17_RS21625	FCV16_RS14165	FCV18_RS05660	JPH1_RS18510
MAV_RS22600	MAH_RS20210	BBJ32_RS07350	KV38_RS22040	BS641_RS23910	BEP52_RS21495	BJP78_RS21895	BJP74_RS21130	DFS55_RS02895	DBO90_RS20805	EX350_RS00895	FCV17_RS02210	FCV16_RS18950	FCV18_RS10455	JPH1_RS23250
MAV_RS04100	MAH_RS03455	BBJ32_RS13310	KV38_RS03665	BS641_RS05290	BEP52_RS03535	BJP78_RS03535	BJP74_RS03505	DFS55_RS21140	DBO90_RS17175	EX350_RS18860	FCV17_RS08965	FCV16_RS01500	FCV18_RS17725	JPH1_RS05305
MAV_RS18090	MAH_RS15635	BBJ32_RS15180	KV38_RS16775	BS641_RS19320	BEP52_RS16765	BJP78_RS17020	BJP74_RS16455	DFS55_RS07800	DBO90_RS02985	EX350_RS05550	FCV17_RS21825	FCV16_RS14360	FCV18_RS05860	JPH1_RS18710
MAV_RS01095	MAH_RS01180	BBJ32_RS11125	KV38_RS01085	BS641_RS01165	BEP52_RS01080	BJP78_RS01090	BJP74_RS01065	DFS55_RS23760	DBO90_RS03945	EX350_RS22695	FCV17_RS06030	FCV16_RS22750	FCV18_RS14235	JPH1_RS01090
MAV_RS03155	MAH_RS02860	BBJ32_RS12710	KV38_RS02935	BS641_RS03225	BEP52_RS02835	BJP78_RS02840	BJP74_RS02810	DFS55_RS21815	DBO90_RS01335	EX350_RS20835	FCV17_RS07795	FCV16_RS24515	FCV18_RS16000	JPH1_RS02840
MAV_RS00885	MAH_RS00970	BBJ32_RS11335	KV38_RS00870	BS641_RS00935	BEP52_RS00870	BJP78_RS00880	BJP74_RS00855	DFS55_RS23970	DBO90_RS03730	EX350_RS22905	FCV17_RS05820	FCV16_RS22540	FCV18_RS14025	JPH1_RS00880
MAV_RS08200	MAH_RS07450	BBJ32_RS00745	KV38_RS07950	BS641_RS15150	BEP52_RS08040	BJP78_RS08025	BJP74_RS07565	DFS55_RS16840	DBO90_RS13110	EX350_RS14690	FCV17_RS19065	FCV16_RS11605	FCV18_RS03095	JPH1_RS09785
MAV_RS09680	MAH_RS08115	BBJ32_RS18890	KV38_RS08635	BS641_RS14455	BEP52_RS08735	BJP78_RS08720	BJP74_RS08270	DFS55_RS16160	DBO90_RS11995	EX350_RS13940	FCV17_RS18395	FCV16_RS10935	FCV18_RS02425	JPH1_RS10500
MAV_RS21560	MAH_RS19145	BBJ32_RS06310	KV38_RS20915	BS641_RS22790	BEP52_RS20385	BJP78_RS20785	BJP74_RS20025	DFS55_RS04030	DBO90_RS19740	EX350_RS02035	FCV17_RS01110	FCV16_RS17850	FCV18_RS09355	JPH1_RS22175
MAV_RS14925	MAH_RS10720	BBJ32_RS00135	KV38_RS13570	BS641_RS08685	BEP52_RS11415	BJP78_RS11400	BJP74_RS14525	DFS55_RS10990	DBO90_RS06660	EX350_RS08770	FCV17_RS13640	FCV16_RS06180	FCV18_RS22490	JPH1_RS15470
MAV_RS11405	MAH_RS13410	BBJ32_RS20405	KV38_RS10415	BS641_RS12520	BEP52_RS14495	BJP78_RS14750	BJP74_RS11470	DFS55_RS14375	DBO90_RS09225	EX350_RS12235	FCV17_RS16845	FCV16_RS09385	FCV18_RS00875	JPH1_RS12080
MAV_RS25330	MAH_RS22555	BBJ32_RS09720	KV38_RS24405	BS641_RS26310	BEP52_RS23875	BJP78_RS24280	BJP74_RS23510	DFS55_RS00515	DBO90_RS23230	EX350_RS24145	FCV17_RS04675	FCV16_RS21390	FCV18_RS12880	JPH1_RS25700
MAV_RS19325	MAH_RS16925	BBJ32_RS04060	KV38_RS18545	BS641_RS20525	BEP52_RS17930	BJP78_RS18330	BJP74_RS17620	DFS55_RS06490	DBO90_RS01770	EX350_RS04345	FCV17_RS23005	FCV16_RS15540	FCV18_RS07040	JPH1_RS19885
MAV_RS00205	MAH_RS00315	BBJ32_RS12015	KV38_RS00210	BS641_RS00230	BEP52_RS00210	BJP78_RS00220	BJP74_RS00195	DFS55_RS00210	DBO90_RS00215	EX350_RS23565	FCV17_RS05175	FCV16_RS21890	FCV18_RS13385	JPH1_RS00230
MAV_RS18575	MAH_RS16180	BBJ32_RS14785	KV38_RS17335	BS641_RS19730	BEP52_RS17170	BJP78_RS17565	BJP74_RS16860	DFS55_RS07245	DBO90_RS02585	EX350_RS05115	FCV17_RS22230	FCV16_RS14765	FCV18_RS06265	JPH1_RS19115
MAV_RS18015	MAH_RS15560	BBJ32_RS15255	KV38_RS16700	BS641_RS19245	BEP52_RS16690	BJP78_RS16945	BJP74_RS16380	DFS55_RS07875	DBO90_RS03060	EX350_RS05630	FCV17_RS21750	FCV16_RS14290	FCV18_RS05785	JPH1_RS18635
MAV_RS02095	MAH_RS01970	BBJ32_RS10325	KV38_RS02030	BS641_RS01975	BEP52_RS01920	BJP78_RS01925	BJP74_RS01905	DFS55_RS22730	DBO90_RS04750	EX350_RS21750	FCV17_RS06885	FCV16_RS23605	FCV18_RS15090	JPH1_RS01925
MAV_RS17940	MAH_RS15485	BBJ32_RS15330	KV38_RS16620	BS641_RS19165	BEP52_RS16610	BJP78_RS16865	BJP74_RS16300	DFS55_RS07955	DBO90_RS10395	EX350_RS05710	FCV17_RS21670	FCV16_RS14210	FCV18_RS05705	JPH1_RS18555
MAV_RS04690	MAH_RS04110	BBJ32_RS13900	KV38_RS04310	BS641_RS05885	BEP52_RS04180	BJP78_RS04185	BJP74_RS04150	DFS55_RS20545	DBO90_RS16580	EX350_RS18260	FCV17_RS09560	FCV16_RS02095	FCV18_RS18320	JPH1_RS05905
MAV_RS00265	MAH_RS00375	BBJ32_RS11955	KV38_RS00270	BS641_RS00290	BEP52_RS00270	BJP78_RS00280	BJP74_RS00255	DFS55_RS00270	DBO90_RS00275	EX350_RS23505	FCV17_RS05235	FCV16_RS21950	FCV18_RS13445	JPH1_RS00290
MAV_RS20920	MAH_RS18505	BBJ32_RS05670	KV38_RS20265	BS641_RS22125	BEP52_RS19735	BJP78_RS19985	BJP74_RS19375	DFS55_RS04680	DBO90_RS19095	EX350_RS02720	FCV17_RS00440	FCV16_RS17180	FCV18_RS08685	JPH1_RS21500
MAV_RS11865	MAH_RS12985	BBJ32_RS20825	KV38_RS10910	BS641_RS12040	BEP52_RS14025	BJP78_RS14280	BJP74_RS11940	DFS55_RS13900	DBO90_RS08785	EX350_RS11745	FCV17_RS16350	FCV16_RS08890	FCV18_RS25230	JPH1_RS12570
MAV_RS04060	MAH_RS03420	BBJ32_RS13270	KV38_RS03625	BS641_RS05250	BEP52_RS03495	BJP78_RS03495	BJP74_RS03465	DFS55_RS21180	DBO90_RS17215	EX350_RS18900	FCV17_RS08925	FCV16_RS01460	FCV18_RS17685	JPH1_RS05265
MAV_RS21765	MAH_RS19350	BBJ32_RS06515	KV38_RS21140	BS641_RS22995	BEP52_RS20590	BJP78_RS20990	BJP74_RS20230	DFS55_RS03805	DBO90_RS19945	EX350_RS01810	FCV17_RS01335	FCV16_RS18075	FCV18_RS09580	JPH1_RS22380
MAV_RS21550	MAH_RS19135	BBJ32_RS06300	KV38_RS20905	BS641_RS22780	BEP52_RS20375	BJP78_RS20775	BJP74_RS20015	DFS55_RS04040	DBO90_RS19730	EX350_RS02045	FCV17_RS01100	FCV16_RS17840	FCV18_RS09345	JPH1_RS22165
MAV_RS10940	MAH_RS13890	BBJ32_RS19935	KV38_RS09715	BS641_RS13165	BEP52_RS14995	BJP78_RS15245	BJP74_RS10975	DFS55_RS14920	DBO90_RS10920	EX350_RS12840	FCV17_RS17315	FCV16_RS09855	FCV18_RS01345	JPH1_RS11615
MAV_RS17185	MAH_RS14710	BBJ32_RS16070	KV38_RS15855	BS641_RS18415	BEP52_RS15805	BJP78_RS16055	BJP74_RS15495	DFS55_RS08720	DBO90_RS09620	EX350_RS06475	FCV17_RS20905	FCV16_RS13445	FCV18_RS04940	JPH1_RS17795
MAV_RS22855	MAH_RS20465	BBJ32_RS07605	KV38_RS22295	BS641_RS24165	BEP52_RS21750	BJP78_RS22150	BJP74_RS21385	DFS55_RS02630	DBO90_RS21060	EX350_RS00640	FCV17_RS02490	FCV16_RS19230	FCV18_RS10730	JPH1_RS23530
MAV_RS13010	MAH_RS12565	BBJ32_RS21130	KV38_RS11230	BS641_RS11245	BEP52_RS13640	BJP78_RS13625	BJP74_RS12300	DFS55_RS13430	DBO90_RS08465	EX350_RS11250	FCV17_RS15960	FCV16_RS08500	FCV18_RS24840	JPH1_RS12935
MAV_RS09710	MAH_RS08145	BBJ32_RS18920	KV38_RS08665	BS641_RS14425	BEP52_RS08765	BJP78_RS08750	BJP74_RS08300	DFS55_RS16130	DBO90_RS11965	EX350_RS13910	FCV17_RS18365	FCV16_RS10905	FCV18_RS02395	JPH1_RS10530
MAV_RS17235	MAH_RS14760	BBJ32_RS16020	KV38_RS15905	BS641_RS18460	BEP52_RS15855	BJP78_RS16105	BJP74_RS15545	DFS55_RS08670	DBO90_RS09670	EX350_RS06425	FCV17_RS20950	FCV16_RS13490	FCV18_RS04985	JPH1_RS17840
MAV_RS21335	MAH_RS18920	BBJ32_RS06085	KV38_RS20690	BS641_RS22565	BEP52_RS20160	BJP78_RS20410	BJP74_RS19800	DFS55_RS04255	DBO90_RS19515	EX350_RS02260	FCV17_RS00885	FCV16_RS17625	FCV18_RS09130	JPH1_RS21950
MAV_RS21575	MAH_RS19160	BBJ32_RS06325	KV38_RS20930	BS641_RS22805	BEP52_RS20400	BJP78_RS20800	BJP74_RS20040	DFS55_RS04015	DBO90_RS19755	EX350_RS02020	FCV17_RS01125	FCV16_RS17865	FCV18_RS09370	JPH1_RS22190
MAV_RS21115	MAH_RS18700	BBJ32_RS05865	KV38_RS20470	BS641_RS22345	BEP52_RS19940	BJP78_RS20190	BJP74_RS19580	DFS55_RS04475	DBO90_RS19295	EX350_RS02480	FCV17_RS00665	FCV16_RS17405	FCV18_RS08910	JPH1_RS21730
MAV_RS07820	MAH_RS07095	BBJ32_RS01100	KV38_RS07465	BS641_RS15520	BEP52_RS07670	BJP78_RS07655	BJP74_RS07195	DFS55_RS17310	DBO90_RS13470	EX350_RS15065	FCV17_RS19435	FCV16_RS11975	FCV18_RS03465	JPH1_RS09415
MAV_RS17885	MAH_RS15430	BBJ32_RS15385	KV38_RS16560	BS641_RS19110	BEP52_RS16550	BJP78_RS16805	BJP74_RS16240	DFS55_RS08015	DBO90_RS10330	EX350_RS05770	FCV17_RS21610	FCV16_RS14150	FCV18_RS05645	JPH1_RS18500
MAV_RS22335	MAH_RS19945	BBJ32_RS07085	KV38_RS21765	BS641_RS23630	BEP52_RS21220	BJP78_RS21615	BJP74_RS20855	DFS55_RS03185	DBO90_RS20530	EX350_RS01175	FCV17_RS01935	FCV16_RS18675	FCV18_RS10180	JPH1_RS22975
MAV_RS18110	MAH_RS15655	BBJ32_RS15160	KV38_RS16795	BS641_RS19340	BEP52_RS16785	BJP78_RS17040	BJP74_RS16475	DFS55_RS07780	DBO90_RS02965	EX350_RS05530	FCV17_RS21845	FCV16_RS14380	FCV18_RS05880	JPH1_RS18730
MAV_RS10420	MAH_RS14230	BBJ32_RS19590	KV38_RS09365	BS641_RS13510	BEP52_RS15340	BJP78_RS15590	BJP74_RS10630	DFS55_RS15265	DBO90_RS11265	EX350_RS13190	FCV17_RS17665	FCV16_RS10205	FCV18_RS01695	JPH1_RS11265
MAV_RS01070	MAH_RS01155	BBJ32_RS11150	KV38_RS01060	BS641_RS01125	BEP52_RS01055	BJP78_RS01065	BJP74_RS01040	DFS55_RS23785	DBO90_RS03920	EX350_RS22720	FCV17_RS06005	FCV16_RS22725	FCV18_RS14210	JPH1_RS01065
MAV_RS21755	MAH_RS19340	BBJ32_RS06505	KV38_RS21130	BS641_RS22985	BEP52_RS20580	BJP78_RS20980	BJP74_RS20220	DFS55_RS03815	DBO90_RS19935	EX350_RS01820	FCV17_RS01325	FCV16_RS18065	FCV18_RS09570	JPH1_RS22370
MAV_RS08055	MAH_RS07320	BBJ32_RS00875	KV38_RS07815	BS641_RS15290	BEP52_RS07910	BJP78_RS07895	BJP74_RS07435	DFS55_RS16980	DBO90_RS13240	EX350_RS14830	FCV17_RS19200	FCV16_RS11740	FCV18_RS03230	JPH1_RS09650
MAV_RS16095	MAH_RS09580	BBJ32_RS17275	KV38_RS14800	BS641_RS17130	BEP52_RS10235	BJP78_RS10220	BJP74_RS09935	DFS55_RS09785	DBO90_RS05450	EX350_RS07615	FCV17_RS12465	FCV16_RS05005	FCV18_RS21325	JPH1_RS16615
MAV_RS11540	MAH_RS13290	BBJ32_RS20525	KV38_RS10600	BS641_RS12360	BEP52_RS14325	BJP78_RS14580	BJP74_RS11640	DFS55_RS14210	DBO90_RS09090	EX350_RS12065	FCV17_RS16680	FCV16_RS09220	FCV18_RS00710	JPH1_RS12250
MAV_RS11235	MAH_RS13565	BBJ32_RS20230	KV38_RS10255	BS641_RS12675	BEP52_RS14655	BJP78_RS14910	BJP74_RS11310	DFS55_RS14535	DBO90_RS10610	EX350_RS12390	FCV17_RS17005	FCV16_RS09545	FCV18_RS01035	JPH1_RS11925
MAV_RS00545	MAH_RS00660	BBJ32_RS11670	KV38_RS00560	BS641_RS00575	BEP52_RS00560	BJP78_RS00570	BJP74_RS00545	DFS55_RS24305	DBO90_RS00565	EX350_RS23215	FCV17_RS05510	FCV16_RS22225	FCV18_RS13715	JPH1_RS00570
MAV_RS20530	MAH_RS18120	BBJ32_RS05285	KV38_RS19875	BS641_RS21735	BEP52_RS19200	BJP78_RS19600	BJP74_RS18890	DFS55_RS05065	DBO90_RS18705	EX350_RS03130	FCV17_RS24255	FCV16_RS16790	FCV18_RS08295	JPH1_RS21100
MAV_RS21570	MAH_RS19155	BBJ32_RS06320	KV38_RS20925	BS641_RS22800	BEP52_RS20395	BJP78_RS20795	BJP74_RS20035	DFS55_RS04020	DBO90_RS19750	EX350_RS02025	FCV17_RS01120	FCV16_RS17860	FCV18_RS09365	JPH1_RS22185
MAV_RS20375	MAH_RS17965	BBJ32_RS05130	KV38_RS19715	BS641_RS21575	BEP52_RS19035	BJP78_RS19435	BJP74_RS18725	DFS55_RS05225	DBO90_RS18545	EX350_RS03290	FCV17_RS24095	FCV16_RS16630	FCV18_RS08135	JPH1_RS20940
MAV_RS03540	MAH_RS03180	BBJ32_RS13035	KV38_RS03265	BS641_RS03565	BEP52_RS03160	BJP78_RS03165	BJP74_RS03135	DFS55_RS21485	DBO90_RS17570	EX350_RS20510	FCV17_RS08120	FCV16_RS24840	FCV18_RS16325	JPH1_RS03165
MAV_RS01120	MAH_RS01205	BBJ32_RS11100	KV38_RS01110	BS641_RS01190	BEP52_RS01105	BJP78_RS01115	BJP74_RS01090	DFS55_RS23735	DBO90_RS03970	EX350_RS22670	FCV17_RS06055	FCV16_RS22775	FCV18_RS14260	JPH1_RS01115
MAV_RS21345	MAH_RS18930	BBJ32_RS06095	KV38_RS20700	BS641_RS22575	BEP52_RS20170	BJP78_RS20420	BJP74_RS19810	DFS55_RS04245	DBO90_RS19525	EX350_RS02250	FCV17_RS00895	FCV16_RS17635	FCV18_RS09140	JPH1_RS21960
MAV_RS06905	MAH_RS06390	BBJ32_RS01865	KV38_RS06645	BS641_RS08190	BEP52_RS06935	BJP78_RS06935	BJP74_RS06475	DFS55_RS18215	DBO90_RS14245	EX350_RS15920	FCV17_RS11855	FCV16_RS04395	FCV18_RS20715	JPH1_RS08265
MAV_RS21705	MAH_RS19290	BBJ32_RS06455	KV38_RS21080	BS641_RS22935	BEP52_RS20530	BJP78_RS20930	BJP74_RS20170	DFS55_RS03865	DBO90_RS19885	EX350_RS01870	FCV17_RS01275	FCV16_RS18015	FCV18_RS09520	JPH1_RS22320
MAV_RS08475	MAH_RS07725	BBJ32_RS00470	KV38_RS08225	BS641_RS14875	BEP52_RS08315	BJP78_RS08300	BJP74_RS07840	DFS55_RS16560	DBO90_RS12835	EX350_RS14415	FCV17_RS18790	FCV16_RS11330	FCV18_RS02820	JPH1_RS10055
MAV_RS01005	MAH_RS01090	BBJ32_RS11215	KV38_RS00995	BS641_RS01060	BEP52_RS00990	BJP78_RS01000	BJP74_RS00975	DFS55_RS23850	DBO90_RS03855	EX350_RS22785	FCV17_RS05940	FCV16_RS22660	FCV18_RS14145	JPH1_RS01000
MAV_RS01025	MAH_RS01110	BBJ32_RS11195	KV38_RS01015	BS641_RS01080	BEP52_RS01010	BJP78_RS01020	BJP74_RS00995	DFS55_RS23830	DBO90_RS03875	EX350_RS22765	FCV17_RS05960	FCV16_RS22680	FCV18_RS14165	JPH1_RS01020
MAV_RS20265	MAH_RS17855	BBJ32_RS05015	KV38_RS19600	BS641_RS21460	BEP52_RS18920	BJP78_RS19320	BJP74_RS18610	DFS55_RS05340	DBO90_RS18425	EX350_RS03405	FCV17_RS23980	FCV16_RS16520	FCV18_RS08020	JPH1_RS20825
MAV_RS04440	MAH_RS03805	BBJ32_RS13650	KV38_RS04010	BS641_RS05635	BEP52_RS03880	BJP78_RS03880	BJP74_RS03850	DFS55_RS20795	DBO90_RS16825	EX350_RS18510	FCV17_RS09310	FCV16_RS01845	FCV18_RS18070	JPH1_RS05655
MAV_RS19080	MAH_RS16685	BBJ32_RS14285	KV38_RS18295	BS641_RS20255	BEP52_RS17680	BJP78_RS18080	BJP74_RS17370	DFS55_RS06735	DBO90_RS02080	EX350_RS04595	FCV17_RS22755	FCV16_RS15290	FCV18_RS06790	JPH1_RS19635
MAV_RS08215	MAH_RS07465	BBJ32_RS00730	KV38_RS07965	BS641_RS15135	BEP52_RS08055	BJP78_RS08040	BJP74_RS07580	DFS55_RS16825	DBO90_RS13095	EX350_RS14675	FCV17_RS19050	FCV16_RS11590	FCV18_RS03080	JPH1_RS09800
MAV_RS01175	MAH_RS01260	BBJ32_RS11045	KV38_RS01165	BS641_RS01245	BEP52_RS01165	BJP78_RS01175	BJP74_RS01150	DFS55_RS23675	DBO90_RS04030	EX350_RS22610	FCV17_RS06115	FCV16_RS22835	FCV18_RS14320	JPH1_RS01175
MAV_RS16790	MAH_RS08895	BBJ32_RS16570	KV38_RS15485	BS641_RS18005	BEP52_RS09525	BJP78_RS09520	BJP74_RS09075	DFS55_RS09090	DBO90_RS03215	EX350_RS06885	FCV17_RS20500	FCV16_RS13040	FCV18_RS04535	JPH1_RS17390
MAV_RS03610	MAH_RS03260	BBJ32_RS13115	KV38_RS03340	BS641_RS03640	BEP52_RS03240	BJP78_RS03245	BJP74_RS03215	DFS55_RS21410	DBO90_RS17490	EX350_RS20435	FCV17_RS08195	FCV16_RS24915	FCV18_RS16400	JPH1_RS03240
MAV_RS10910	MAH_RS13920	BBJ32_RS19905	KV38_RS09680	BS641_RS13195	BEP52_RS15025	BJP78_RS15275	BJP74_RS10945	DFS55_RS14950	DBO90_RS10950	EX350_RS12875	FCV17_RS17350	FCV16_RS09890	FCV18_RS01380	JPH1_RS11580
MAV_RS16065	MAH_RS09610	BBJ32_RS17305	KV38_RS14770	BS641_RS17100	BEP52_RS10265	BJP78_RS10250	BJP74_RS09965	DFS55_RS09815	DBO90_RS05480	EX350_RS07645	FCV17_RS12495	FCV16_RS05035	FCV18_RS21355	JPH1_RS16585
MAV_RS13425	MAH_RS12155	BBJ32_RS21580	KV38_RS11625	BS641_RS10795	BEP52_RS13215	BJP78_RS13200	BJP74_RS12730	DFS55_RS13035	DBO90_RS07995	EX350_RS10805	FCV17_RS15530	FCV16_RS08070	FCV18_RS24410	JPH1_RS13380
MAV_RS21995	MAH_RS19600	BBJ32_RS06745	KV38_RS21395	BS641_RS23245	BEP52_RS20850	BJP78_RS21245	BJP74_RS20485	DFS55_RS03550	DBO90_RS20175	EX350_RS01540	FCV17_RS01565	FCV16_RS18305	FCV18_RS09810	JPH1_RS22610
MAV_RS22805	MAH_RS20415	BBJ32_RS07555	KV38_RS22245	BS641_RS24115	BEP52_RS21700	BJP78_RS22100	BJP74_RS21335	DFS55_RS02680	DBO90_RS21010	EX350_RS00690	FCV17_RS02440	FCV16_RS19180	FCV18_RS10680	JPH1_RS23480
MAV_RS22260	MAH_RS19865	BBJ32_RS07010	KV38_RS21670	BS641_RS23515	BEP52_RS21125	BJP78_RS21520	BJP74_RS20760	DFS55_RS03275	DBO90_RS20450	EX350_RS01265	FCV17_RS01840	FCV16_RS18580	FCV18_RS10085	JPH1_RS22885
MAV_RS06450	MAH_RS05925	BBJ32_RS02325	KV38_RS06180	BS641_RS07720	BEP52_RS06470	BJP78_RS06465	BJP74_RS06010	DFS55_RS18685	DBO90_RS14730	EX350_RS16390	FCV17_RS11390	FCV16_RS03930	FCV18_RS20250	JPH1_RS07800
MAV_RS07460	MAH_RS06715	BBJ32_RS01535	KV38_RS07050	BS641_RS15885	BEP52_RS07270	BJP78_RS07270	BJP74_RS06810	DFS55_RS17705	DBO90_RS13905	EX350_RS15435	FCV17_RS19800	FCV16_RS12340	FCV18_RS03835	JPH1_RS09045
MAV_RS01435	MAH_RS01305	BBJ32_RS11000	KV38_RS01210	BS641_RS01295	BEP52_RS01210	BJP78_RS01220	BJP74_RS01195	DFS55_RS23630	DBO90_RS04075	EX350_RS22560	FCV17_RS06165	FCV16_RS22885	FCV18_RS14370	JPH1_RS01225
MAV_RS22255	MAH_RS19860	BBJ32_RS07005	KV38_RS21665	BS641_RS23510	BEP52_RS21120	BJP78_RS21515	BJP74_RS20755	DFS55_RS03280	DBO90_RS20445	EX350_RS01270	FCV17_RS01835	FCV16_RS18575	FCV18_RS10080	JPH1_RS22880
MAV_RS19180	MAH_RS16785	BBJ32_RS03915	KV38_RS18400	BS641_RS20380	BEP52_RS17785	BJP78_RS18185	BJP74_RS17475	DFS55_RS06635	DBO90_RS01915	EX350_RS04490	FCV17_RS22860	FCV16_RS15395	FCV18_RS06895	JPH1_RS19740
MAV_RS10825	MAH_RS14005	BBJ32_RS19820	KV38_RS09595	BS641_RS13280	BEP52_RS15110	BJP78_RS15360	BJP74_RS10860	DFS55_RS15035	DBO90_RS11035	EX350_RS12960	FCV17_RS17435	FCV16_RS09975	FCV18_RS01465	JPH1_RS11495
MAV_RS17385	MAH_RS14905	BBJ32_RS15875	KV38_RS16055	BS641_RS18610	BEP52_RS16005	BJP78_RS16255	BJP74_RS15695	DFS55_RS08520	DBO90_RS09820	EX350_RS06275	FCV17_RS21100	FCV16_RS13640	FCV18_RS05135	JPH1_RS17990
MAV_RS21635	MAH_RS19220	BBJ32_RS06385	KV38_RS21010	BS641_RS22865	BEP52_RS20460	BJP78_RS20860	BJP74_RS20100	DFS55_RS03935	DBO90_RS19815	EX350_RS01940	FCV17_RS01205	FCV16_RS17945	FCV18_RS09450	JPH1_RS22250
MAV_RS00705	MAH_RS00790	BBJ32_RS11515	KV38_RS00690	BS641_RS00740	BEP52_RS00690	BJP78_RS00700	BJP74_RS00675	DFS55_RS24150	DBO90_RS00720	EX350_RS23085	FCV17_RS05640	FCV16_RS22355	FCV18_RS13845	JPH1_RS00700
MAV_RS00120	MAH_RS00245	BBJ32_RS10000	KV38_RS00125	BS641_RS00160	BEP52_RS00130	BJP78_RS00130	BJP74_RS00130	DFS55_RS00120	DBO90_RS00115	EX350_RS23655	FCV17_RS04995	FCV16_RS21710	FCV18_RS13200	JPH1_RS00155
MAV_RS00675	MAH_RS00760	BBJ32_RS11545	KV38_RS00660	BS641_RS00710	BEP52_RS00660	BJP78_RS00670	BJP74_RS00645	DFS55_RS24180	DBO90_RS00690	EX350_RS23115	FCV17_RS05610	FCV16_RS22325	FCV18_RS13815	JPH1_RS00670
MAV_RS09805	MAH_RS08240	BBJ32_RS19015	KV38_RS08770	BS641_RS14330	BEP52_RS08860	BJP78_RS08845	BJP74_RS08395	DFS55_RS16035	DBO90_RS11870	EX350_RS13815	FCV17_RS18270	FCV16_RS10810	FCV18_RS02300	JPH1_RS10625
MAV_RS20305	MAH_RS17895	BBJ32_RS05055	KV38_RS19645	BS641_RS21505	BEP52_RS18965	BJP78_RS19365	BJP74_RS18655	DFS55_RS05295	DBO90_RS18470	EX350_RS03360	FCV17_RS24025	FCV16_RS16565	FCV18_RS08065	JPH1_RS20870
MAV_RS01460	MAH_RS01330	BBJ32_RS10975	KV38_RS01245	BS641_RS01320	BEP52_RS01245	BJP78_RS01250	BJP74_RS01225	DFS55_RS23600	DBO90_RS04110	EX350_RS22530	FCV17_RS06195	FCV16_RS22915	FCV18_RS14400	JPH1_RS01260
MAV_RS17400	MAH_RS14920	BBJ32_RS15860	KV38_RS16070	BS641_RS18625	BEP52_RS16020	BJP78_RS16270	BJP74_RS15710	DFS55_RS08505	DBO90_RS09835	EX350_RS06260	FCV17_RS21115	FCV16_RS13655	FCV18_RS05150	JPH1_RS18005
MAV_RS10915	MAH_RS13915	BBJ32_RS19910	KV38_RS09685	BS641_RS13190	BEP52_RS15020	BJP78_RS15270	BJP74_RS10950	DFS55_RS14945	DBO90_RS10945	EX350_RS12870	FCV17_RS17345	FCV16_RS09885	FCV18_RS01375	JPH1_RS11585
MAV_RS01480	MAH_RS01350	BBJ32_RS10955	KV38_RS01265	BS641_RS01340	BEP52_RS01265	BJP78_RS01270	BJP74_RS01245	DFS55_RS23580	DBO90_RS04130	EX350_RS22510	FCV17_RS06215	FCV16_RS22935	FCV18_RS14420	JPH1_RS01280
MAV_RS11335	MAH_RS13475	BBJ32_RS20340	KV38_RS10350	BS641_RS12585	BEP52_RS14560	BJP78_RS14815	BJP74_RS11405	DFS55_RS14440	DBO90_RS09290	EX350_RS12300	FCV17_RS16910	FCV16_RS09450	FCV18_RS00940	JPH1_RS12015
MAV_RS03235	MAH_RS02940	BBJ32_RS12790	KV38_RS03020	BS641_RS03305	BEP52_RS02920	BJP78_RS02925	BJP74_RS02895	DFS55_RS21730	DBO90_RS01420	EX350_RS20750	FCV17_RS07880	FCV16_RS24600	FCV18_RS16085	JPH1_RS02925
MAV_RS21105	MAH_RS18690	BBJ32_RS05855	KV38_RS20455	BS641_RS22330	BEP52_RS19925	BJP78_RS20175	BJP74_RS19565	DFS55_RS04490	DBO90_RS19280	EX350_RS02495	FCV17_RS00650	FCV16_RS17390	FCV18_RS08895	JPH1_RS21715
MAV_RS18485	MAH_RS16090	BBJ32_RS14875	KV38_RS17245	BS641_RS19640	BEP52_RS17080	BJP78_RS17475	BJP74_RS16770	DFS55_RS07335	DBO90_RS02675	EX350_RS05205	FCV17_RS22140	FCV16_RS14675	FCV18_RS06175	JPH1_RS19025
MAV_RS03640	MAH_RS03285	BBJ32_RS13135	KV38_RS03360	BS641_RS03660	BEP52_RS03260	BJP78_RS03265	BJP74_RS03235	DFS55_RS21390	DBO90_RS17470	EX350_RS20415	FCV17_RS08215	FCV16_RS24935	FCV18_RS16420	JPH1_RS03260
MAV_RS13180	MAH_RS12390	BBJ32_RS21320	KV38_RS11410	BS641_RS11070	BEP52_RS13460	BJP78_RS13445	BJP74_RS12485	DFS55_RS13250	DBO90_RS08270	EX350_RS11070	FCV17_RS15780	FCV16_RS08320	FCV18_RS24660	JPH1_RS13115
MAV_RS02715	MAH_RS02420	BBJ32_RS12270	KV38_RS02495	BS641_RS02440	BEP52_RS02385	BJP78_RS02390	BJP74_RS02370	DFS55_RS22255	DBO90_RS00895	EX350_RS21275	FCV17_RS07350	FCV16_RS24070	FCV18_RS15555	JPH1_RS02400
MAV_RS01565	MAH_RS01435	BBJ32_RS10870	KV38_RS01350	BS641_RS01425	BEP52_RS01350	BJP78_RS01355	BJP74_RS01330	DFS55_RS23415	DBO90_RS04215	EX350_RS22325	FCV17_RS06300	FCV16_RS23020	FCV18_RS14505	JPH1_RS01365
MAV_RS04320	MAH_RS03685	BBJ32_RS13530	KV38_RS03885	BS641_RS05510	BEP52_RS03755	BJP78_RS03755	BJP74_RS03725	DFS55_RS20920	DBO90_RS16950	EX350_RS18635	FCV17_RS09185	FCV16_RS01720	FCV18_RS17945	JPH1_RS05530
MAV_RS04790	MAH_RS04210	BBJ32_RS14000	KV38_RS04410	BS641_RS05985	BEP52_RS04280	BJP78_RS04285	BJP74_RS04250	DFS55_RS20445	DBO90_RS16480	EX350_RS18160	FCV17_RS09660	FCV16_RS02195	FCV18_RS18420	JPH1_RS06015
MAV_RS05240	MAH_RS04660	BBJ32_RS03570	KV38_RS04865	BS641_RS06435	BEP52_RS05180	BJP78_RS05175	BJP74_RS04720	DFS55_RS19995	DBO90_RS16015	EX350_RS17705	FCV17_RS10120	FCV16_RS02655	FCV18_RS18875	JPH1_RS06470
MAV_RS24105	MAH_RS21710	BBJ32_RS08860	KV38_RS23575	BS641_RS25480	BEP52_RS23005	BJP78_RS23410	BJP74_RS22640	DFS55_RS01345	DBO90_RS22340	EX350_RS24975	FCV17_RS03815	FCV16_RS20555	FCV18_RS12045	JPH1_RS24875
MAV_RS20505	MAH_RS18095	BBJ32_RS05260	KV38_RS19850	BS641_RS21710	BEP52_RS19170	BJP78_RS19570	BJP74_RS18860	DFS55_RS05090	DBO90_RS18680	EX350_RS03155	FCV17_RS24230	FCV16_RS16765	FCV18_RS08270	JPH1_RS21075
MAV_RS10465	MAH_RS14185	BBJ32_RS19635	KV38_RS09410	BS641_RS13465	BEP52_RS15295	BJP78_RS15545	BJP74_RS10675	DFS55_RS15220	DBO90_RS11220	EX350_RS13145	FCV17_RS17620	FCV16_RS10160	FCV18_RS01650	JPH1_RS11310
MAV_RS07300	MAH_RS06555	BBJ32_RS01695	KV38_RS06870	BS641_RS16070	BEP52_RS07105	BJP78_RS07105	BJP74_RS06645	DFS55_RS17890	DBO90_RS14065	EX350_RS15610	FCV17_RS19960	FCV16_RS12500	FCV18_RS03995	JPH1_RS08885
MAV_RS24650	MAH_RS21840	BBJ32_RS09020	KV38_RS23705	BS641_RS25610	BEP52_RS23135	BJP78_RS23540	BJP74_RS22770	DFS55_RS01215	DBO90_RS22505	EX350_RS24845	FCV17_RS03945	FCV16_RS20685	FCV18_RS12175	JPH1_RS25005
MAV_RS04360	MAH_RS03725	BBJ32_RS13570	KV38_RS03925	BS641_RS05550	BEP52_RS03795	BJP78_RS03795	BJP74_RS03765	DFS55_RS20880	DBO90_RS16910	EX350_RS18595	FCV17_RS09225	FCV16_RS01760	FCV18_RS17985	JPH1_RS05570
MAV_RS11045	MAH_RS13775	BBJ32_RS20040	KV38_RS09835	BS641_RS13050	BEP52_RS14880	BJP78_RS15130	BJP74_RS11090	DFS55_RS14805	DBO90_RS10805	EX350_RS12725	FCV17_RS17200	FCV16_RS09740	FCV18_RS01230	JPH1_RS11730
MAV_RS04875	MAH_RS04295	BBJ32_RS14085	KV38_RS04495	BS641_RS06070	BEP52_RS04365	BJP78_RS04370	BJP74_RS04335	DFS55_RS20360	DBO90_RS16395	EX350_RS18075	FCV17_RS09745	FCV16_RS02280	FCV18_RS18505	JPH1_RS06100
MAV_RS04335	MAH_RS03700	BBJ32_RS13545	KV38_RS03900	BS641_RS05525	BEP52_RS03770	BJP78_RS03770	BJP74_RS03740	DFS55_RS20905	DBO90_RS16935	EX350_RS18620	FCV17_RS09200	FCV16_RS01735	FCV18_RS17960	JPH1_RS05545
MAV_RS14920	MAH_RS10725	BBJ32_RS00130	KV38_RS13565	BS641_RS08690	BEP52_RS11420	BJP78_RS11405	BJP74_RS14520	DFS55_RS10995	DBO90_RS06665	EX350_RS08775	FCV17_RS13645	FCV16_RS06185	FCV18_RS22495	JPH1_RS15465
MAV_RS23205	MAH_RS20815	BBJ32_RS07955	KV38_RS22650	BS641_RS24525	BEP52_RS22105	BJP78_RS22505	BJP74_RS21740	DFS55_RS02275	DBO90_RS21415	EX350_RS00260	FCV17_RS02845	FCV16_RS19585	FCV18_RS11085	JPH1_RS23905
MAV_RS00915	MAH_RS01000	BBJ32_RS11305	KV38_RS00900	BS641_RS00965	BEP52_RS00900	BJP78_RS00910	BJP74_RS00885	DFS55_RS23940	DBO90_RS03760	EX350_RS22875	FCV17_RS05850	FCV16_RS22570	FCV18_RS14055	JPH1_RS00910
MAV_RS24120	MAH_RS21725	BBJ32_RS08875	KV38_RS23590	BS641_RS25495	BEP52_RS23020	BJP78_RS23425	BJP74_RS22655	DFS55_RS01330	DBO90_RS22355	EX350_RS24960	FCV17_RS03830	FCV16_RS20570	FCV18_RS12060	JPH1_RS24890
MAV_RS05770	MAH_RS05275	BBJ32_RS02980	KV38_RS05500	BS641_RS07060	BEP52_RS05795	BJP78_RS05790	BJP74_RS05335	DFS55_RS19355	DBO90_RS15410	EX350_RS17070	FCV17_RS10665	FCV16_RS03205	FCV18_RS19515	JPH1_RS07115
MAV_RS07305	MAH_RS06560	BBJ32_RS01690	KV38_RS06875	BS641_RS16065	BEP52_RS07110	BJP78_RS07110	BJP74_RS06650	DFS55_RS17885	DBO90_RS14060	EX350_RS15605	FCV17_RS19955	FCV16_RS12495	FCV18_RS03990	JPH1_RS08890
MAV_RS16185	MAH_RS09505	BBJ32_RS17200	KV38_RS14875	BS641_RS17220	BEP52_RS10160	BJP78_RS10145	BJP74_RS09860	DFS55_RS09695	DBO90_RS05375	EX350_RS07540	FCV17_RS12390	FCV16_RS04930	FCV18_RS21250	JPH1_RS16705
MAV_RS00070	MAH_RS00195	BBJ32_RS09950	KV38_RS00075	BS641_RS00110	BEP52_RS00080	BJP78_RS00080	BJP74_RS00080	DFS55_RS00070	DBO90_RS00065	EX350_RS23705	FCV17_RS04945	FCV16_RS21660	FCV18_RS13150	JPH1_RS00105
MAV_RS01660	MAH_RS01525	BBJ32_RS10765	KV38_RS01455	BS641_RS01525	BEP52_RS01455	BJP78_RS01460	BJP74_RS01440	DFS55_RS23305	DBO90_RS04305	EX350_RS22220	FCV17_RS06430	FCV16_RS23150	FCV18_RS14635	JPH1_RS01470
MAV_RS07265	MAH_RS06520	BBJ32_RS01730	KV38_RS06835	BS641_RS16105	BEP52_RS07070	BJP78_RS07070	BJP74_RS06610	DFS55_RS17925	DBO90_RS14100	EX350_RS15645	FCV17_RS19995	FCV16_RS12535	FCV18_RS04030	JPH1_RS08850
MAV_RS04870	MAH_RS04290	BBJ32_RS14080	KV38_RS04490	BS641_RS06065	BEP52_RS04360	BJP78_RS04365	BJP74_RS04330	DFS55_RS20365	DBO90_RS16400	EX350_RS18080	FCV17_RS09740	FCV16_RS02275	FCV18_RS18500	JPH1_RS06095
MAV_RS20790	MAH_RS18370	BBJ32_RS05540	KV38_RS20135	BS641_RS21990	BEP52_RS19605	BJP78_RS19850	BJP74_RS19240	DFS55_RS04810	DBO90_RS18965	EX350_RS02855	FCV17_RS24510	FCV16_RS17045	FCV18_RS08550	JPH1_RS21365
MAV_RS04075	MAH_RS03430	BBJ32_RS13285	KV38_RS03640	BS641_RS05265	BEP52_RS03510	BJP78_RS03510	BJP74_RS03480	DFS55_RS21165	DBO90_RS17200	EX350_RS18885	FCV17_RS08940	FCV16_RS01475	FCV18_RS17700	JPH1_RS05280
MAV_RS11080	MAH_RS13740	BBJ32_RS20075	KV38_RS09870	BS641_RS12990	BEP52_RS14845	BJP78_RS15095	BJP74_RS11125	DFS55_RS14770	DBO90_RS10770	EX350_RS12690	FCV17_RS17165	FCV16_RS09705	FCV18_RS01195	JPH1_RS11765
MAV_RS22505	MAH_RS20115	BBJ32_RS07255	KV38_RS21945	BS641_RS23815	BEP52_RS21400	BJP78_RS21800	BJP74_RS21035	DFS55_RS03000	DBO90_RS20710	EX350_RS00990	FCV17_RS02115	FCV16_RS18855	FCV18_RS10360	JPH1_RS23155
MAV_RS18130	MAH_RS15675	BBJ32_RS15140	KV38_RS16815	BS641_RS19360	BEP52_RS16805	BJP78_RS17060	BJP74_RS16495	DFS55_RS07760	DBO90_RS02945	EX350_RS05510	FCV17_RS21865	FCV16_RS14400	FCV18_RS05900	JPH1_RS18750
MAV_RS20435	MAH_RS18025	BBJ32_RS05190	KV38_RS19775	BS641_RS21635	BEP52_RS19095	BJP78_RS19495	BJP74_RS18785	DFS55_RS05165	DBO90_RS18605	EX350_RS03230	FCV17_RS24155	FCV16_RS16690	FCV18_RS08195	JPH1_RS21000
MAV_RS14680	MAH_RS10935	BBJ32_RS22685	KV38_RS13355	BS641_RS08900	BEP52_RS11630	BJP78_RS11615	BJP74_RS14315	DFS55_RS11235	DBO90_RS06885	EX350_RS09015	FCV17_RS13885	FCV16_RS06425	FCV18_RS22735	JPH1_RS15225
MAV_RS15920	MAH_RS09750	BBJ32_RS17445	KV38_RS14625	BS641_RS16955	BEP52_RS10410	BJP78_RS10395	BJP74_RS10120	DFS55_RS09955	DBO90_RS05625	EX350_RS07785	FCV17_RS12630	FCV16_RS05175	FCV18_RS21495	JPH1_RS16445
MAV_RS01675	MAH_RS01540	BBJ32_RS10750	KV38_RS01470	BS641_RS01540	BEP52_RS01470	BJP78_RS01475	BJP74_RS01455	DFS55_RS23290	DBO90_RS04320	EX350_RS22205	FCV17_RS06445	FCV16_RS23165	FCV18_RS14650	JPH1_RS01485
MAV_RS13535	MAH_RS12055	BBJ32_RS21680	KV38_RS11725	BS641_RS10690	BEP52_RS13115	BJP78_RS13100	BJP74_RS12830	DFS55_RS12935	DBO90_RS07895	EX350_RS10705	FCV17_RS15430	FCV16_RS07970	FCV18_RS24310	JPH1_RS13480
MAV_RS15175	MAH_RS10460	BBJ32_RS18160	KV38_RS13840	BS641_RS08415	BEP52_RS11140	BJP78_RS11125	BJP74_RS14800	DFS55_RS10720	DBO90_RS06375	EX350_RS08495	FCV17_RS13370	FCV16_RS05910	FCV18_RS22220	JPH1_RS15745
MAV_RS23600	MAH_RS21205	BBJ32_RS08350	KV38_RS23055	BS641_RS24965	BEP52_RS22520	BJP78_RS22925	BJP74_RS22155	DFS55_RS01865	DBO90_RS21825	EX350_RS25490	FCV17_RS03300	FCV16_RS20040	FCV18_RS11530	JPH1_RS24355
MAV_RS02255	MAH_RS02130	BBJ32_RS10165	KV38_RS02195	BS641_RS02140	BEP52_RS02085	BJP78_RS02090	BJP74_RS02070	DFS55_RS22555	DBO90_RS04915	EX350_RS21575	FCV17_RS07050	FCV16_RS23770	FCV18_RS15255	JPH1_RS02100
MAV_RS23770	MAH_RS21375	BBJ32_RS08525	KV38_RS23230	BS641_RS25140	BEP52_RS22695	BJP78_RS23100	BJP74_RS22330	DFS55_RS01690	DBO90_RS22000	EX350_RS25315	FCV17_RS03475	FCV16_RS20215	FCV18_RS11705	JPH1_RS24530
MAV_RS17620	MAH_RS15170	BBJ32_RS15645	KV38_RS16295	BS641_RS18845	BEP52_RS16285	BJP78_RS16535	BJP74_RS15975	DFS55_RS08280	DBO90_RS10060	EX350_RS06040	FCV17_RS21335	FCV16_RS13875	FCV18_RS05370	JPH1_RS18230
MAV_RS16175	MAH_RS09515	BBJ32_RS17210	KV38_RS14865	BS641_RS17210	BEP52_RS10170	BJP78_RS10155	BJP74_RS09870	DFS55_RS09705	DBO90_RS05385	EX350_RS07550	FCV17_RS12400	FCV16_RS04940	FCV18_RS21260	JPH1_RS16695
MAV_RS26365	MAH_RS24225	BBJ32_RS22975	KV38_RS24585	BS641_RS26495	BEP52_RS24060	BJP78_RS24465	BJP74_RS23695	DFS55_RS24590	DBO90_RS23415	EX350_RS23965	FCV17_RS04850	FCV16_RS21565	FCV18_RS13055	JPH1_RS25875
MAV_RS19175	MAH_RS16780	BBJ32_RS03910	KV38_RS18395	BS641_RS20375	BEP52_RS17780	BJP78_RS18180	BJP74_RS17470	DFS55_RS06640	DBO90_RS01920	EX350_RS04495	FCV17_RS22855	FCV16_RS15390	FCV18_RS06890	JPH1_RS19735
MAV_RS10970	MAH_RS13860	BBJ32_RS19965	KV38_RS09745	BS641_RS13135	BEP52_RS14965	BJP78_RS15215	BJP74_RS11005	DFS55_RS14890	DBO90_RS10890	EX350_RS12810	FCV17_RS17285	FCV16_RS09825	FCV18_RS01315	JPH1_RS11645
MAV_RS01745	MAH_RS01610	BBJ32_RS10680	KV38_RS01540	BS641_RS01610	BEP52_RS01540	BJP78_RS01545	BJP74_RS01525	DFS55_RS23220	DBO90_RS04390	EX350_RS22135	FCV17_RS06515	FCV16_RS23235	FCV18_RS14720	JPH1_RS01555
MAV_RS13390	MAH_RS12190	BBJ32_RS21545	KV38_RS11585	BS641_RS10835	BEP52_RS13255	BJP78_RS13240	BJP74_RS12690	DFS55_RS13075	DBO90_RS08035	EX350_RS10845	FCV17_RS15570	FCV16_RS08110	FCV18_RS24450	JPH1_RS13340
MAV_RS05990	MAH_RS05465	BBJ32_RS02790	KV38_RS05700	BS641_RS07255	BEP52_RS05995	BJP78_RS05990	BJP74_RS05535	DFS55_RS19160	DBO90_RS15210	EX350_RS16875	FCV17_RS10910	FCV16_RS03450	FCV18_RS19760	JPH1_RS07320
MAV_RS19020	MAH_RS16625	BBJ32_RS14345	KV38_RS17795	BS641_RS20195	BEP52_RS17620	BJP78_RS18020	BJP74_RS17310	DFS55_RS06795	DBO90_RS02140	EX350_RS04655	FCV17_RS22695	FCV16_RS15230	FCV18_RS06730	JPH1_RS19575
MAV_RS02740	MAH_RS02445	BBJ32_RS12295	KV38_RS02520	BS641_RS02465	BEP52_RS02410	BJP78_RS02415	BJP74_RS02395	DFS55_RS22230	DBO90_RS00920	EX350_RS21250	FCV17_RS07375	FCV16_RS24095	FCV18_RS15580	JPH1_RS02425
MAV_RS18045	MAH_RS15590	BBJ32_RS15225	KV38_RS16730	BS641_RS19275	BEP52_RS16720	BJP78_RS16975	BJP74_RS16410	DFS55_RS07845	DBO90_RS03030	EX350_RS05600	FCV17_RS21780	FCV16_RS14320	FCV18_RS05815	JPH1_RS18665
MAV_RS11060	MAH_RS13760	BBJ32_RS20055	KV38_RS09850	BS641_RS13010	BEP52_RS14865	BJP78_RS15115	BJP74_RS11105	DFS55_RS14790	DBO90_RS10790	EX350_RS12710	FCV17_RS17185	FCV16_RS09725	FCV18_RS01215	JPH1_RS11745
MAV_RS10460	MAH_RS14190	BBJ32_RS19630	KV38_RS09405	BS641_RS13470	BEP52_RS15300	BJP78_RS15550	BJP74_RS10670	DFS55_RS15225	DBO90_RS11225	EX350_RS13150	FCV17_RS17625	FCV16_RS10165	FCV18_RS01655	JPH1_RS11305
MAV_RS18450	MAH_RS16055	BBJ32_RS14910	KV38_RS17210	BS641_RS19605	BEP52_RS17045	BJP78_RS17440	BJP74_RS16735	DFS55_RS07370	DBO90_RS02710	EX350_RS05240	FCV17_RS22105	FCV16_RS14640	FCV18_RS06140	JPH1_RS18990
MAV_RS02540	MAH_RS02245	BBJ32_RS12095	KV38_RS02315	BS641_RS02260	BEP52_RS02205	BJP78_RS02210	BJP74_RS02190	DFS55_RS22435	DBO90_RS03545	EX350_RS21455	FCV17_RS07170	FCV16_RS23890	FCV18_RS15375	JPH1_RS02220
MAV_RS15225	MAH_RS10410	BBJ32_RS18110	KV38_RS13890	BS641_RS16245	BEP52_RS11090	BJP78_RS11075	BJP74_RS14850	DFS55_RS10670	DBO90_RS06325	EX350_RS08445	FCV17_RS13320	FCV16_RS05860	FCV18_RS22170	JPH1_RS15795
MAV_RS01775	MAH_RS01640	BBJ32_RS10650	KV38_RS01695	BS641_RS01640	BEP52_RS01575	BJP78_RS01580	BJP74_RS01560	DFS55_RS23070	DBO90_RS04420	EX350_RS22100	FCV17_RS06545	FCV16_RS23265	FCV18_RS14750	JPH1_RS01585
MAV_RS06585	MAH_RS06070	BBJ32_RS02185	KV38_RS06325	BS641_RS07865	BEP52_RS06615	BJP78_RS06610	BJP74_RS06155	DFS55_RS18540	DBO90_RS14585	EX350_RS16245	FCV17_RS11535	FCV16_RS04075	FCV18_RS20395	JPH1_RS07945
MAV_RS03560	MAH_RS03200	BBJ32_RS13055	KV38_RS03285	BS641_RS03585	BEP52_RS03180	BJP78_RS03185	BJP74_RS03155	DFS55_RS21465	DBO90_RS17550	EX350_RS20490	FCV17_RS08140	FCV16_RS24860	FCV18_RS16345	JPH1_RS03185
MAV_RS15130	MAH_RS10505	BBJ32_RS18205	KV38_RS13795	BS641_RS08460	BEP52_RS11185	BJP78_RS11170	BJP74_RS14755	DFS55_RS10765	DBO90_RS06420	EX350_RS08540	FCV17_RS13415	FCV16_RS05955	FCV18_RS22265	JPH1_RS15700
MAV_RS19905	MAH_RS17495	BBJ32_RS04645	KV38_RS19230	BS641_RS21095	BEP52_RS18550	BJP78_RS18950	BJP74_RS18240	DFS55_RS05710	DBO90_RS18045	EX350_RS03775	FCV17_RS23570	FCV16_RS16115	FCV18_RS07615	JPH1_RS20455
MAV_RS04970	MAH_RS04395	BBJ32_RS14180	KV38_RS04590	BS641_RS06165	BEP52_RS04465	BJP78_RS04470	BJP74_RS04435	DFS55_RS20265	DBO90_RS16300	EX350_RS17980	FCV17_RS09840	FCV16_RS02375	FCV18_RS18600	JPH1_RS06195
MAV_RS18000	MAH_RS15545	BBJ32_RS15270	KV38_RS16685	BS641_RS19230	BEP52_RS16675	BJP78_RS16930	BJP74_RS16365	DFS55_RS07890	DBO90_RS03075	EX350_RS05645	FCV17_RS21735	FCV16_RS14275	FCV18_RS05770	JPH1_RS18620
MAV_RS06930	MAH_RS06415	BBJ32_RS01840	KV38_RS06670	BS641_RS08215	BEP52_RS06960	BJP78_RS06960	BJP74_RS06500	DFS55_RS18190	DBO90_RS14220	EX350_RS15895	FCV17_RS11880	FCV16_RS04420	FCV18_RS20740	JPH1_RS08290
MAV_RS04935	MAH_RS04355	BBJ32_RS14145	KV38_RS04555	BS641_RS06130	BEP52_RS04425	BJP78_RS04430	BJP74_RS04395	DFS55_RS20300	DBO90_RS16335	EX350_RS18015	FCV17_RS09805	FCV16_RS02340	FCV18_RS18565	JPH1_RS06160
MAV_RS15955	MAH_RS09715	BBJ32_RS17410	KV38_RS14660	BS641_RS16990	BEP52_RS10375	BJP78_RS10360	BJP74_RS10085	DFS55_RS09920	DBO90_RS05590	EX350_RS07750	FCV17_RS12595	FCV16_RS05140	FCV18_RS21460	JPH1_RS16480
MAV_RS17255	MAH_RS14780	BBJ32_RS16000	KV38_RS15925	BS641_RS18480	BEP52_RS15875	BJP78_RS16125	BJP74_RS15565	DFS55_RS08650	DBO90_RS09690	EX350_RS06405	FCV17_RS20970	FCV16_RS13510	FCV18_RS05005	JPH1_RS17860
MAV_RS01805	MAH_RS01670	BBJ32_RS10620	KV38_RS01725	BS641_RS01670	BEP52_RS01605	BJP78_RS01610	BJP74_RS01590	DFS55_RS23040	DBO90_RS04450	EX350_RS22070	FCV17_RS06575	FCV16_RS23295	FCV18_RS14780	JPH1_RS01615
MAV_RS23965	MAH_RS21570	BBJ32_RS08720	KV38_RS23425	BS641_RS25335	BEP52_RS22860	BJP78_RS23265	BJP74_RS22495	DFS55_RS01495	DBO90_RS22195	EX350_RS25120	FCV17_RS03670	FCV16_RS20410	FCV18_RS11900	JPH1_RS24725
MAV_RS16090	MAH_RS09585	BBJ32_RS17280	KV38_RS14795	BS641_RS17125	BEP52_RS10240	BJP78_RS10225	BJP74_RS09940	DFS55_RS09790	DBO90_RS05455	EX350_RS07620	FCV17_RS12470	FCV16_RS05010	FCV18_RS21330	JPH1_RS16610
MAV_RS13790	MAH_RS11800	BBJ32_RS21935	KV38_RS11985	BS641_RS10435	BEP52_RS12860	BJP78_RS12845	BJP74_RS13085	DFS55_RS12680	DBO90_RS07640	EX350_RS10455	FCV17_RS15175	FCV16_RS07715	FCV18_RS24050	JPH1_RS13735
MAV_RS04290	MAH_RS03655	BBJ32_RS13500	KV38_RS03855	BS641_RS05480	BEP52_RS03725	BJP78_RS03725	BJP74_RS03695	DFS55_RS20950	DBO90_RS16980	EX350_RS18665	FCV17_RS09155	FCV16_RS01690	FCV18_RS17915	JPH1_RS05500
MAV_RS03530	MAH_RS03170	BBJ32_RS13025	KV38_RS03255	BS641_RS03555	BEP52_RS03150	BJP78_RS03155	BJP74_RS03125	DFS55_RS21495	DBO90_RS17580	EX350_RS20520	FCV17_RS08110	FCV16_RS24830	FCV18_RS16315	JPH1_RS03155
MAV_RS13760	MAH_RS11830	BBJ32_RS21905	KV38_RS11955	BS641_RS10465	BEP52_RS12890	BJP78_RS12875	BJP74_RS13055	DFS55_RS12710	DBO90_RS07670	EX350_RS10485	FCV17_RS15205	FCV16_RS07745	FCV18_RS24080	JPH1_RS13705
MAV_RS07690	MAH_RS06965	BBJ32_RS01275	KV38_RS07315	BS641_RS15655	BEP52_RS07535	BJP78_RS07520	BJP74_RS07060	DFS55_RS17445	DBO90_RS13650	EX350_RS15200	FCV17_RS19570	FCV16_RS12110	FCV18_RS03600	JPH1_RS09280
MAV_RS21265	MAH_RS18850	BBJ32_RS06015	KV38_RS20620	BS641_RS22495	BEP52_RS20090	BJP78_RS20340	BJP74_RS19730	DFS55_RS04325	DBO90_RS19445	EX350_RS02330	FCV17_RS00815	FCV16_RS17555	FCV18_RS09060	JPH1_RS21880
MAV_RS15455	MAH_RS10190	BBJ32_RS17885	KV38_RS14120	BS641_RS16475	BEP52_RS10860	BJP78_RS10845	BJP74_RS15080	DFS55_RS10440	DBO90_RS06095	EX350_RS08210	FCV17_RS13070	FCV16_RS05610	FCV18_RS21920	JPH1_RS16025
MAV_RS21080	MAH_RS18665	BBJ32_RS05830	KV38_RS20430	BS641_RS22305	BEP52_RS19900	BJP78_RS20150	BJP74_RS19540	DFS55_RS04515	DBO90_RS19255	EX350_RS02520	FCV17_RS00625	FCV16_RS17365	FCV18_RS08870	JPH1_RS21690
MAV_RS01875	MAH_RS01740	BBJ32_RS10545	KV38_RS01800	BS641_RS01750	BEP52_RS01680	BJP78_RS01685	BJP74_RS01665	DFS55_RS22965	DBO90_RS04525	EX350_RS21995	FCV17_RS06650	FCV16_RS23370	FCV18_RS14855	JPH1_RS01690
MAV_RS00745	MAH_RS00830	BBJ32_RS11475	KV38_RS00730	BS641_RS00785	BEP52_RS00730	BJP78_RS00740	BJP74_RS00715	DFS55_RS24110	DBO90_RS03585	EX350_RS23045	FCV17_RS05680	FCV16_RS22395	FCV18_RS13885	JPH1_RS00740
MAV_RS17180	MAH_RS14705	BBJ32_RS16075	KV38_RS15850	BS641_RS18410	BEP52_RS15800	BJP78_RS16050	BJP74_RS15490	DFS55_RS08725	DBO90_RS09615	EX350_RS06480	FCV17_RS20900	FCV16_RS13440	FCV18_RS04935	JPH1_RS17790
MAV_RS01540	MAH_RS01410	BBJ32_RS10895	KV38_RS01325	BS641_RS01400	BEP52_RS01325	BJP78_RS01330	BJP74_RS01305	DFS55_RS23520	DBO90_RS04190	EX350_RS22450	FCV17_RS06275	FCV16_RS22995	FCV18_RS14480	JPH1_RS01340
MAV_RS17430	MAH_RS14950	BBJ32_RS15830	KV38_RS16100	BS641_RS18655	BEP52_RS16050	BJP78_RS16300	BJP74_RS15740	DFS55_RS08475	DBO90_RS09865	EX350_RS06230	FCV17_RS21145	FCV16_RS13685	FCV18_RS05180	JPH1_RS18035
MAV_RS19890	MAH_RS17480	BBJ32_RS04630	KV38_RS19215	BS641_RS21080	BEP52_RS18535	BJP78_RS18935	BJP74_RS18225	DFS55_RS05725	DBO90_RS18030	EX350_RS03790	FCV17_RS23555	FCV16_RS16100	FCV18_RS07600	JPH1_RS20440
MAV_RS11665	MAH_RS13185	BBJ32_RS20630	KV38_RS10705	BS641_RS12235	BEP52_RS14220	BJP78_RS14475	BJP74_RS11745	DFS55_RS14105	DBO90_RS08985	EX350_RS11940	FCV17_RS16555	FCV16_RS09095	FCV18_RS25435	JPH1_RS12375
MAV_RS03095	MAH_RS02800	BBJ32_RS12650	KV38_RS02875	BS641_RS02855	BEP52_RS02775	BJP78_RS02780	BJP74_RS02750	DFS55_RS21875	DBO90_RS01275	EX350_RS20895	FCV17_RS07730	FCV16_RS24450	FCV18_RS15935	JPH1_RS02780
MAV_RS17375	MAH_RS14895	BBJ32_RS15885	KV38_RS16045	BS641_RS18600	BEP52_RS15995	BJP78_RS16245	BJP74_RS15685	DFS55_RS08530	DBO90_RS09810	EX350_RS06285	FCV17_RS21090	FCV16_RS13630	FCV18_RS05125	JPH1_RS17980
MAV_RS14975	MAH_RS10655	BBJ32_RS18355	KV38_RS13635	BS641_RS08620	BEP52_RS11350	BJP78_RS11335	BJP74_RS14590	DFS55_RS10925	DBO90_RS06595	EX350_RS08700	FCV17_RS13575	FCV16_RS06115	FCV18_RS22425	JPH1_RS15535
MAV_RS17465	MAH_RS14985	BBJ32_RS15795	KV38_RS16135	BS641_RS18690	BEP52_RS16085	BJP78_RS16335	BJP74_RS15775	DFS55_RS08440	DBO90_RS09905	EX350_RS06195	FCV17_RS21180	FCV16_RS13720	FCV18_RS05215	JPH1_RS18070
MAV_RS01920	MAH_RS01795	BBJ32_RS10500	KV38_RS01850	BS641_RS01795	BEP52_RS01735	BJP78_RS01740	BJP74_RS01720	DFS55_RS22915	DBO90_RS04570	EX350_RS21935	FCV17_RS06700	FCV16_RS23420	FCV18_RS14905	JPH1_RS01740
MAV_RS10005	MAH_RS08425	BBJ32_RS19195	KV38_RS08950	BS641_RS14140	BEP52_RS09040	BJP78_RS09025	BJP74_RS08575	DFS55_RS15855	DBO90_RS11690	EX350_RS13635	FCV17_RS18090	FCV16_RS10630	FCV18_RS02120	JPH1_RS10810
MAV_RS06300	MAH_RS05775	BBJ32_RS02475	KV38_RS06030	BS641_RS07570	BEP52_RS06320	BJP78_RS06315	BJP74_RS05860	DFS55_RS18835	DBO90_RS14880	EX350_RS16540	FCV17_RS11240	FCV16_RS03780	FCV18_RS20090	JPH1_RS07650
MAV_RS04445	MAH_RS03810	BBJ32_RS13655	KV38_RS04015	BS641_RS05640	BEP52_RS03885	BJP78_RS03885	BJP74_RS03855	DFS55_RS20790	DBO90_RS16820	EX350_RS18505	FCV17_RS09315	FCV16_RS01850	FCV18_RS18075	JPH1_RS05660
MAV_RS06620	MAH_RS06105	BBJ32_RS02145	KV38_RS06360	BS641_RS07900	BEP52_RS06650	BJP78_RS06645	BJP74_RS06190	DFS55_RS18500	DBO90_RS14545	EX350_RS16205	FCV17_RS11570	FCV16_RS04110	FCV18_RS20430	JPH1_RS07980
MAV_RS02480	MAH_RS02185	BBJ32_RS10110	KV38_RS02255	BS641_RS02200	BEP52_RS02145	BJP78_RS02150	BJP74_RS02130	DFS55_RS22495	DBO90_RS04975	EX350_RS21515	FCV17_RS07110	FCV16_RS23830	FCV18_RS15315	JPH1_RS02160
MAV_RS07615	MAH_RS06890	BBJ32_RS01350	KV38_RS07240	BS641_RS15730	BEP52_RS07460	BJP78_RS07445	BJP74_RS06985	DFS55_RS17520	DBO90_RS13725	EX350_RS15275	FCV17_RS19645	FCV16_RS12185	FCV18_RS03675	JPH1_RS09205
MAV_RS16235	MAH_RS09455	BBJ32_RS17150	KV38_RS14925	BS641_RS17270	BEP52_RS10110	BJP78_RS10095	BJP74_RS09810	DFS55_RS09645	DBO90_RS05325	EX350_RS07490	FCV17_RS12340	FCV16_RS04880	FCV18_RS21200	JPH1_RS16755
MAV_RS00340	MAH_RS00450	BBJ32_RS11880	KV38_RS00345	BS641_RS00365	BEP52_RS00345	BJP78_RS00355	BJP74_RS00330	DFS55_RS00345	DBO90_RS00350	EX350_RS23430	FCV17_RS05300	FCV16_RS22015	FCV18_RS13510	JPH1_RS00365
MAV_RS22460	MAH_RS20070	BBJ32_RS07210	KV38_RS21900	BS641_RS23765	BEP52_RS21355	BJP78_RS21755	BJP74_RS20990	DFS55_RS03050	DBO90_RS20665	EX350_RS01040	FCV17_RS02070	FCV16_RS18810	FCV18_RS10315	JPH1_RS23110
MAV_RS05365	MAH_RS04820	BBJ32_RS03440	KV38_RS05040	BS641_RS06575	BEP52_RS05335	BJP78_RS05330	BJP74_RS04875	DFS55_RS19840	DBO90_RS15870	EX350_RS17530	FCV17_RS10300	FCV16_RS02840	FCV18_RS19055	JPH1_RS06620
MAV_RS01925	MAH_RS01800	BBJ32_RS10495	KV38_RS01855	BS641_RS01800	BEP52_RS01740	BJP78_RS01745	BJP74_RS01725	DFS55_RS22910	DBO90_RS04575	EX350_RS21930	FCV17_RS06705	FCV16_RS23425	FCV18_RS14910	JPH1_RS01745
MAV_RS16125	MAH_RS09550	BBJ32_RS17245	KV38_RS14830	BS641_RS17160	BEP52_RS10205	BJP78_RS10190	BJP74_RS09905	DFS55_RS09755	DBO90_RS05420	EX350_RS07585	FCV17_RS12435	FCV16_RS04975	FCV18_RS21295	JPH1_RS16645
MAV_RS14630	MAH_RS10985	BBJ32_RS22635	KV38_RS13305	BS641_RS08950	BEP52_RS11680	BJP78_RS11665	BJP74_RS14265	DFS55_RS11285	DBO90_RS06935	EX350_RS09065	FCV17_RS13935	FCV16_RS06475	FCV18_RS22785	JPH1_RS15175
MAV_RS14915	MAH_RS10730	BBJ32_RS00125	KV38_RS13560	BS641_RS08695	BEP52_RS11425	BJP78_RS11410	BJP74_RS14515	DFS55_RS11000	DBO90_RS06670	EX350_RS08780	FCV17_RS13650	FCV16_RS06190	FCV18_RS22500	JPH1_RS15460
MAV_RS21360	MAH_RS18945	BBJ32_RS06110	KV38_RS20715	BS641_RS22590	BEP52_RS20185	BJP78_RS20435	BJP74_RS19825	DFS55_RS04230	DBO90_RS19540	EX350_RS02235	FCV17_RS00910	FCV16_RS17650	FCV18_RS09155	JPH1_RS21975
MAV_RS05255	MAH_RS04675	BBJ32_RS03555	KV38_RS04885	BS641_RS06455	BEP52_RS05200	BJP78_RS05195	BJP74_RS04740	DFS55_RS19975	DBO90_RS15995	EX350_RS17685	FCV17_RS10140	FCV16_RS02675	FCV18_RS18895	JPH1_RS06490
MAV_RS11460	MAH_RS13355	BBJ32_RS20460	KV38_RS10470	BS641_RS12465	BEP52_RS14440	BJP78_RS14695	BJP74_RS11525	DFS55_RS14320	DBO90_RS09170	EX350_RS12180	FCV17_RS16790	FCV16_RS09330	FCV18_RS00820	JPH1_RS12135
MAV_RS21440	MAH_RS19025	BBJ32_RS06190	KV38_RS20795	BS641_RS22670	BEP52_RS20265	BJP78_RS20665	BJP74_RS19905	DFS55_RS04150	DBO90_RS19620	EX350_RS02155	FCV17_RS00990	FCV16_RS17730	FCV18_RS09235	JPH1_RS22055
MAV_RS02180	MAH_RS02055	BBJ32_RS10240	KV38_RS02120	BS641_RS02065	BEP52_RS02010	BJP78_RS02015	BJP74_RS01995	DFS55_RS22630	DBO90_RS04840	EX350_RS21650	FCV17_RS06975	FCV16_RS23695	FCV18_RS15180	JPH1_RS02025
MAV_RS21865	MAH_RS19450	BBJ32_RS06615	KV38_RS21240	BS641_RS23095	BEP52_RS20690	BJP78_RS21090	BJP74_RS20330	DFS55_RS03705	DBO90_RS20045	EX350_RS01710	FCV17_RS01435	FCV16_RS18175	FCV18_RS09680	JPH1_RS22480
MAV_RS22555	MAH_RS20165	BBJ32_RS07305	KV38_RS21995	BS641_RS23865	BEP52_RS21450	BJP78_RS21850	BJP74_RS21085	DFS55_RS02950	DBO90_RS20760	EX350_RS00940	FCV17_RS02165	FCV16_RS18905	FCV18_RS10410	JPH1_RS23205
MAV_RS01930	MAH_RS01805	BBJ32_RS10490	KV38_RS01860	BS641_RS01805	BEP52_RS01745	BJP78_RS01750	BJP74_RS01730	DFS55_RS22905	DBO90_RS04580	EX350_RS21925	FCV17_RS06710	FCV16_RS23430	FCV18_RS14915	JPH1_RS01750
MAV_RS03445	MAH_RS03085	BBJ32_RS12935	KV38_RS03170	BS641_RS03470	BEP52_RS03065	BJP78_RS03070	BJP74_RS03040	DFS55_RS21580	DBO90_RS01565	EX350_RS20605	FCV17_RS08025	FCV16_RS24745	FCV18_RS16230	JPH1_RS03070
MAV_RS19375	MAH_RS16975	BBJ32_RS04110	KV38_RS18595	BS641_RS20575	BEP52_RS17980	BJP78_RS18380	BJP74_RS17670	DFS55_RS06440	DBO90_RS01720	EX350_RS04295	FCV17_RS23055	FCV16_RS15590	FCV18_RS07090	JPH1_RS19935
MAV_RS06345	MAH_RS05820	BBJ32_RS02430	KV38_RS06075	BS641_RS07615	BEP52_RS06365	BJP78_RS06360	BJP74_RS05905	DFS55_RS18790	DBO90_RS14835	EX350_RS16495	FCV17_RS11285	FCV16_RS03825	FCV18_RS20145	JPH1_RS07695
MAV_RS21735	MAH_RS19320	BBJ32_RS06485	KV38_RS21110	BS641_RS22965	BEP52_RS20560	BJP78_RS20960	BJP74_RS20200	DFS55_RS03835	DBO90_RS19915	EX350_RS01840	FCV17_RS01305	FCV16_RS18045	FCV18_RS09550	JPH1_RS22350
MAV_RS20650	MAH_RS18235	BBJ32_RS05400	KV38_RS19995	BS641_RS21855	BEP52_RS19470	BJP78_RS19715	BJP74_RS19105	DFS55_RS04950	DBO90_RS18820	EX350_RS02995	FCV17_RS24370	FCV16_RS16905	FCV18_RS08410	JPH1_RS21225
MAV_RS10865	MAH_RS13965	BBJ32_RS19860	KV38_RS09635	BS641_RS13240	BEP52_RS15070	BJP78_RS15320	BJP74_RS10900	DFS55_RS14995	DBO90_RS10995	EX350_RS12920	FCV17_RS17395	FCV16_RS09935	FCV18_RS01425	JPH1_RS11535
MAV_RS02700	MAH_RS02405	BBJ32_RS12255	KV38_RS02480	BS641_RS02425	BEP52_RS02370	BJP78_RS02375	BJP74_RS02355	DFS55_RS22270	DBO90_RS00880	EX350_RS21290	FCV17_RS07335	FCV16_RS24055	FCV18_RS15540	JPH1_RS02385
MAV_RS01180	MAH_RS01265	BBJ32_RS11040	KV38_RS01170	BS641_RS01250	BEP52_RS01170	BJP78_RS01180	BJP74_RS01155	DFS55_RS23670	DBO90_RS04035	EX350_RS22605	FCV17_RS06120	FCV16_RS22840	FCV18_RS14325	JPH1_RS01180
MAV_RS19165	MAH_RS16770	BBJ32_RS03900	KV38_RS18385	BS641_RS20365	BEP52_RS17770	BJP78_RS18170	BJP74_RS17460	DFS55_RS06650	DBO90_RS01930	EX350_RS04505	FCV17_RS22845	FCV16_RS15380	FCV18_RS06880	JPH1_RS19725
MAV_RS17530	MAH_RS15080	BBJ32_RS15735	KV38_RS16200	BS641_RS18750	BEP52_RS16190	BJP78_RS16440	BJP74_RS15880	DFS55_RS08375	DBO90_RS09965	EX350_RS06135	FCV17_RS21240	FCV16_RS13780	FCV18_RS05275	JPH1_RS18135
MAV_RS01935	MAH_RS01810	BBJ32_RS10485	KV38_RS01865	BS641_RS01810	BEP52_RS01750	BJP78_RS01755	BJP74_RS01735	DFS55_RS22900	DBO90_RS04585	EX350_RS21920	FCV17_RS06715	FCV16_RS23435	FCV18_RS14920	JPH1_RS01755
MAV_RS06475	MAH_RS05955	BBJ32_RS02300	KV38_RS06205	BS641_RS07745	BEP52_RS06495	BJP78_RS06490	BJP74_RS06035	DFS55_RS18660	DBO90_RS14705	EX350_RS16365	FCV17_RS11415	FCV16_RS03955	FCV18_RS20275	JPH1_RS07825
MAV_RS00970	MAH_RS01055	BBJ32_RS11250	KV38_RS00955	BS641_RS01020	BEP52_RS00955	BJP78_RS00965	BJP74_RS00940	DFS55_RS23885	DBO90_RS03815	EX350_RS22820	FCV17_RS05905	FCV16_RS22625	FCV18_RS14110	JPH1_RS00965
MAV_RS22935	MAH_RS20545	BBJ32_RS07685	KV38_RS22380	BS641_RS24250	BEP52_RS21835	BJP78_RS22235	BJP74_RS21470	DFS55_RS02545	DBO90_RS21145	EX350_RS00550	FCV17_RS02575	FCV16_RS19315	FCV18_RS10815	JPH1_RS23615
MAV_RS22090	MAH_RS19695	BBJ32_RS06840	KV38_RS21490	BS641_RS23340	BEP52_RS20945	BJP78_RS21340	BJP74_RS20580	DFS55_RS03455	DBO90_RS20270	EX350_RS01445	FCV17_RS01660	FCV16_RS18400	FCV18_RS09905	JPH1_RS22705
MAV_RS23735	MAH_RS21340	BBJ32_RS08490	KV38_RS23195	BS641_RS25105	BEP52_RS22660	BJP78_RS23065	BJP74_RS22295	DFS55_RS01725	DBO90_RS21965	EX350_RS25350	FCV17_RS03440	FCV16_RS20180	FCV18_RS11670	JPH1_RS24495
MAV_RS00370	MAH_RS00480	BBJ32_RS11850	KV38_RS00375	BS641_RS00395	BEP52_RS00375	BJP78_RS00385	BJP74_RS00360	DFS55_RS00375	DBO90_RS00380	EX350_RS23400	FCV17_RS05335	FCV16_RS22050	FCV18_RS13540	JPH1_RS00395
MAV_RS08145	MAH_RS07395	BBJ32_RS00800	KV38_RS07890	BS641_RS15210	BEP52_RS07985	BJP78_RS07970	BJP74_RS07510	DFS55_RS16900	DBO90_RS13165	EX350_RS14750	FCV17_RS19125	FCV16_RS11665	FCV18_RS03155	JPH1_RS09725
MAV_RS03055	MAH_RS02760	BBJ32_RS12610	KV38_RS02835	BS641_RS02805	BEP52_RS02735	BJP78_RS02740	BJP74_RS02710	DFS55_RS21915	DBO90_RS01235	EX350_RS20935	FCV17_RS07690	FCV16_RS24410	FCV18_RS15895	JPH1_RS02740
MAV_RS17450	MAH_RS14970	BBJ32_RS15810	KV38_RS16120	BS641_RS18675	BEP52_RS16070	BJP78_RS16320	BJP74_RS15760	DFS55_RS08455	DBO90_RS09890	EX350_RS06210	FCV17_RS21165	FCV16_RS13705	FCV18_RS05200	JPH1_RS18055
MAV_RS15755	MAH_RS09915	BBJ32_RS17610	KV38_RS14460	BS641_RS16790	BEP52_RS10575	BJP78_RS10560	BJP74_RS10285	DFS55_RS10120	DBO90_RS05790	EX350_RS07950	FCV17_RS12795	FCV16_RS05340	FCV18_RS21660	JPH1_RS16280
MAV_RS01945	MAH_RS01820	BBJ32_RS10475	KV38_RS01875	BS641_RS01820	BEP52_RS01760	BJP78_RS01765	BJP74_RS01745	DFS55_RS22890	DBO90_RS04595	EX350_RS21910	FCV17_RS06725	FCV16_RS23445	FCV18_RS14930	JPH1_RS01765
MAV_RS16730	MAH_RS08955	BBJ32_RS16630	KV38_RS15425	BS641_RS17945	BEP52_RS09585	BJP78_RS09580	BJP74_RS09135	DFS55_RS09150	DBO90_RS03275	EX350_RS06945	FCV17_RS20440	FCV16_RS12980	FCV18_RS04475	JPH1_RS17330
MAV_RS25795	MAH_RS23560	BBJ32_RS02565	KV38_RS05940	BS641_RS07480	BEP52_RS06230	BJP78_RS06225	BJP74_RS05770	DFS55_RS18925	DBO90_RS14970	EX350_RS16635	FCV17_RS11150	FCV16_RS03690	FCV18_RS20000	JPH1_RS07560
MAV_RS07705	MAH_RS06980	BBJ32_RS01260	KV38_RS07330	BS641_RS15640	BEP52_RS07550	BJP78_RS07535	BJP74_RS07075	DFS55_RS17430	DBO90_RS13635	EX350_RS15185	FCV17_RS19555	FCV16_RS12095	FCV18_RS03585	JPH1_RS09295
MAV_RS03645	MAH_RS03290	BBJ32_RS13140	KV38_RS03365	BS641_RS03665	BEP52_RS03265	BJP78_RS03270	BJP74_RS03240	DFS55_RS21385	DBO90_RS17465	EX350_RS20410	FCV17_RS08220	FCV16_RS24940	FCV18_RS16425	JPH1_RS03265
MAV_RS07910	MAH_RS07185	BBJ32_RS01010	KV38_RS07675	BS641_RS15425	BEP52_RS07770	BJP78_RS07755	BJP74_RS07295	DFS55_RS17115	DBO90_RS13375	EX350_RS14970	FCV17_RS19340	FCV16_RS11880	FCV18_RS03370	JPH1_RS09510
MAV_RS19870	MAH_RS17460	BBJ32_RS04610	KV38_RS19190	BS641_RS21055	BEP52_RS18510	BJP78_RS18910	BJP74_RS18200	DFS55_RS05750	DBO90_RS18005	EX350_RS03815	FCV17_RS23530	FCV16_RS16075	FCV18_RS07575	JPH1_RS20415
MAV_RS05015	MAH_RS04440	BBJ32_RS03795	KV38_RS04645	BS641_RS06215	BEP52_RS04960	BJP78_RS04950	BJP74_RS04490	DFS55_RS20215	DBO90_RS16240	EX350_RS17925	FCV17_RS09895	FCV16_RS02430	FCV18_RS18655	JPH1_RS06250
MAV_RS04895	MAH_RS04315	BBJ32_RS14105	KV38_RS04515	BS641_RS06090	BEP52_RS04385	BJP78_RS04390	BJP74_RS04355	DFS55_RS20340	DBO90_RS16375	EX350_RS18055	FCV17_RS09765	FCV16_RS02300	FCV18_RS18525	JPH1_RS06120
MAV_RS26270	MAH_RS23580	BBJ32_RS08405	KV38_RS23110	BS641_RS25020	BEP52_RS22575	BJP78_RS22980	BJP74_RS22210	DFS55_RS01810	DBO90_RS21880	EX350_RS25435	FCV17_RS03355	FCV16_RS20095	FCV18_RS11585	JPH1_RS24410
MAV_RS02650	MAH_RS02355	BBJ32_RS12205	KV38_RS02430	BS641_RS02375	BEP52_RS02320	BJP78_RS02325	BJP74_RS02305	DFS55_RS22320	DBO90_RS00830	EX350_RS21340	FCV17_RS07285	FCV16_RS24005	FCV18_RS15490	JPH1_RS02335
MAV_RS04470	MAH_RS03835	BBJ32_RS13680	KV38_RS04040	BS641_RS05665	BEP52_RS03910	BJP78_RS03910	BJP74_RS03880	DFS55_RS20765	DBO90_RS16795	EX350_RS18480	FCV17_RS09340	FCV16_RS01875	FCV18_RS18100	JPH1_RS05685
MAV_RS21365	MAH_RS18950	BBJ32_RS06115	KV38_RS20720	BS641_RS22595	BEP52_RS20190	BJP78_RS20440	BJP74_RS19830	DFS55_RS04225	DBO90_RS19545	EX350_RS02230	FCV17_RS00915	FCV16_RS17655	FCV18_RS09160	JPH1_RS21980
MAV_RS21740	MAH_RS19325	BBJ32_RS06490	KV38_RS21115	BS641_RS22970	BEP52_RS20565	BJP78_RS20965	BJP74_RS20205	DFS55_RS03830	DBO90_RS19920	EX350_RS01835	FCV17_RS01310	FCV16_RS18050	FCV18_RS09555	JPH1_RS22355
MAV_RS08005	MAH_RS07280	BBJ32_RS00915	KV38_RS07770	BS641_RS15330	BEP52_RS07865	BJP78_RS07850	BJP74_RS07390	DFS55_RS17020	DBO90_RS13280	EX350_RS14875	FCV17_RS19245	FCV16_RS11785	FCV18_RS03275	JPH1_RS09605
MAV_RS22040	MAH_RS19645	BBJ32_RS06790	KV38_RS21440	BS641_RS23290	BEP52_RS20895	BJP78_RS21290	BJP74_RS20530	DFS55_RS03505	DBO90_RS20220	EX350_RS01495	FCV17_RS01610	FCV16_RS18350	FCV18_RS09855	JPH1_RS22655
MAV_RS11090	MAH_RS13730	BBJ32_RS20085	KV38_RS09880	BS641_RS12980	BEP52_RS14835	BJP78_RS15085	BJP74_RS11135	DFS55_RS14760	DBO90_RS10760	EX350_RS12680	FCV17_RS17155	FCV16_RS09695	FCV18_RS01185	JPH1_RS11775
MAV_RS15760	MAH_RS09910	BBJ32_RS17605	KV38_RS14465	BS641_RS16795	BEP52_RS10570	BJP78_RS10555	BJP74_RS10280	DFS55_RS10115	DBO90_RS05785	EX350_RS07945	FCV17_RS12790	FCV16_RS05335	FCV18_RS21655	JPH1_RS16285
MAV_RS21355	MAH_RS18940	BBJ32_RS06105	KV38_RS20710	BS641_RS22585	BEP52_RS20180	BJP78_RS20430	BJP74_RS19820	DFS55_RS04235	DBO90_RS19535	EX350_RS02240	FCV17_RS00905	FCV16_RS17645	FCV18_RS09150	JPH1_RS21970
MAV_RS20910	MAH_RS18495	BBJ32_RS05660	KV38_RS20255	BS641_RS22115	BEP52_RS19725	BJP78_RS19975	BJP74_RS19365	DFS55_RS04690	DBO90_RS19085	EX350_RS02730	FCV17_RS00430	FCV16_RS17170	FCV18_RS08675	JPH1_RS21490
MAV_RS20380	MAH_RS17970	BBJ32_RS05135	KV38_RS19720	BS641_RS21580	BEP52_RS19040	BJP78_RS19440	BJP74_RS18730	DFS55_RS05220	DBO90_RS18550	EX350_RS03285	FCV17_RS24100	FCV16_RS16635	FCV18_RS08140	JPH1_RS20945
MAV_RS01990	MAH_RS01865	BBJ32_RS10430	KV38_RS01920	BS641_RS01865	BEP52_RS01805	BJP78_RS01810	BJP74_RS01790	DFS55_RS22845	DBO90_RS04640	EX350_RS21865	FCV17_RS06770	FCV16_RS23490	FCV18_RS14975	JPH1_RS01810
MAV_RS07895	MAH_RS07170	BBJ32_RS01025	KV38_RS07550	BS641_RS15440	BEP52_RS07755	BJP78_RS07740	BJP74_RS07280	DFS55_RS17225	DBO90_RS13390	EX350_RS14985	FCV17_RS19355	FCV16_RS11895	FCV18_RS03385	JPH1_RS09495
MAV_RS20785	MAH_RS18365	BBJ32_RS05535	KV38_RS20130	BS641_RS21985	BEP52_RS19600	BJP78_RS19845	BJP74_RS19235	DFS55_RS04815	DBO90_RS18960	EX350_RS02860	FCV17_RS24505	FCV16_RS17040	FCV18_RS08545	JPH1_RS21360
MAV_RS16415	MAH_RS09270	BBJ32_RS16970	KV38_RS15105	BS641_RS17450	BEP52_RS09925	BJP78_RS09910	BJP74_RS09625	DFS55_RS09465	DBO90_RS05145	EX350_RS07310	FCV17_RS12160	FCV16_RS04700	FCV18_RS21020	JPH1_RS16935
MAV_RS22700	MAH_RS20310	BBJ32_RS07450	KV38_RS22140	BS641_RS24010	BEP52_RS21595	BJP78_RS21995	BJP74_RS21230	DFS55_RS02795	DBO90_RS20905	EX350_RS00795	FCV17_RS02335	FCV16_RS19075	FCV18_RS10575	JPH1_RS23375
MAV_RS20620	MAH_RS18205	BBJ32_RS05370	KV38_RS19960	BS641_RS21825	BEP52_RS19440	BJP78_RS19685	BJP74_RS19075	DFS55_RS04980	DBO90_RS18790	EX350_RS03025	FCV17_RS24340	FCV16_RS16875	FCV18_RS08380	JPH1_RS21195
MAV_RS19170	MAH_RS16775	BBJ32_RS03905	KV38_RS18390	BS641_RS20370	BEP52_RS17775	BJP78_RS18175	BJP74_RS17465	DFS55_RS06645	DBO90_RS01925	EX350_RS04500	FCV17_RS22850	FCV16_RS15385	FCV18_RS06885	JPH1_RS19730
MAV_RS23165	MAH_RS20775	BBJ32_RS07915	KV38_RS22610	BS641_RS24485	BEP52_RS22065	BJP78_RS22465	BJP74_RS21700	DFS55_RS02315	DBO90_RS21375	EX350_RS00300	FCV17_RS02805	FCV16_RS19545	FCV18_RS11045	JPH1_RS23865
MAV_RS19995	MAH_RS17585	BBJ32_RS04735	KV38_RS19320	BS641_RS21185	BEP52_RS18640	BJP78_RS19040	BJP74_RS18330	DFS55_RS05620	DBO90_RS18135	EX350_RS03685	FCV17_RS23660	FCV16_RS16205	FCV18_RS07705	JPH1_RS20545
MAV_RS13875	MAH_RS11710	BBJ32_RS22020	KV38_RS12075	BS641_RS10350	BEP52_RS12775	BJP78_RS12760	BJP74_RS13170	DFS55_RS12590	DBO90_RS07555	EX350_RS10370	FCV17_RS15090	FCV16_RS07630	FCV18_RS23965	JPH1_RS13820
MAV_RS16420	MAH_RS09265	BBJ32_RS16965	KV38_RS15110	BS641_RS17455	BEP52_RS09920	BJP78_RS09905	BJP74_RS09620	DFS55_RS09460	DBO90_RS05140	EX350_RS07305	FCV17_RS12155	FCV16_RS04695	FCV18_RS21015	JPH1_RS16940
MAV_RS01995	MAH_RS01870	BBJ32_RS10425	KV38_RS01925	BS641_RS01870	BEP52_RS01810	BJP78_RS01815	BJP74_RS01795	DFS55_RS22840	DBO90_RS04645	EX350_RS21860	FCV17_RS06775	FCV16_RS23495	FCV18_RS14980	JPH1_RS01815
MAV_RS18785	MAH_RS16395	BBJ32_RS14570	KV38_RS17555	BS641_RS19955	BEP52_RS17385	BJP78_RS17785	BJP74_RS17075	DFS55_RS07025	DBO90_RS02370	EX350_RS04895	FCV17_RS22450	FCV16_RS14985	FCV18_RS06485	JPH1_RS19335
MAV_RS08205	MAH_RS07455	BBJ32_RS00740	KV38_RS07955	BS641_RS15145	BEP52_RS08045	BJP78_RS08030	BJP74_RS07570	DFS55_RS16835	DBO90_RS13105	EX350_RS14685	FCV17_RS19060	FCV16_RS11600	FCV18_RS03090	JPH1_RS09790
MAV_RS04330	MAH_RS03695	BBJ32_RS13540	KV38_RS03895	BS641_RS05520	BEP52_RS03765	BJP78_RS03765	BJP74_RS03735	DFS55_RS20910	DBO90_RS16940	EX350_RS18625	FCV17_RS09195	FCV16_RS01730	FCV18_RS17955	JPH1_RS05540
MAV_RS00380	MAH_RS00490	BBJ32_RS11840	KV38_RS00385	BS641_RS00405	BEP52_RS00385	BJP78_RS00395	BJP74_RS00370	DFS55_RS00385	DBO90_RS00390	EX350_RS23390	FCV17_RS05345	FCV16_RS22060	FCV18_RS13550	JPH1_RS00405
MAV_RS22825	MAH_RS20435	BBJ32_RS07575	KV38_RS22265	BS641_RS24135	BEP52_RS21720	BJP78_RS22120	BJP74_RS21355	DFS55_RS02660	DBO90_RS21030	EX350_RS00670	FCV17_RS02460	FCV16_RS19200	FCV18_RS10700	JPH1_RS23500
MAV_RS00735	MAH_RS00820	BBJ32_RS11485	KV38_RS00720	BS641_RS00775	BEP52_RS00720	BJP78_RS00730	BJP74_RS00705	DFS55_RS24120	DBO90_RS03575	EX350_RS23055	FCV17_RS05670	FCV16_RS22385	FCV18_RS13875	JPH1_RS00730
MAV_RS20445	MAH_RS18035	BBJ32_RS05200	KV38_RS19785	BS641_RS21645	BEP52_RS19105	BJP78_RS19505	BJP74_RS18795	DFS55_RS05155	DBO90_RS18615	EX350_RS03220	FCV17_RS24165	FCV16_RS16700	FCV18_RS08205	JPH1_RS21010
MAV_RS11180	MAH_RS13640	BBJ32_RS20175	KV38_RS09975	BS641_RS12890	BEP52_RS14735	BJP78_RS14985	BJP74_RS11235	DFS55_RS14665	DBO90_RS10665	EX350_RS12585	FCV17_RS17060	FCV16_RS09600	FCV18_RS01090	JPH1_RS11870
MAV_RS20150	MAH_RS17740	BBJ32_RS04900	KV38_RS19485	BS641_RS21345	BEP52_RS18805	BJP78_RS19205	BJP74_RS18495	DFS55_RS05455	DBO90_RS18310	EX350_RS03520	FCV17_RS23830	FCV16_RS16370	FCV18_RS07870	JPH1_RS20710
MAV_RS17715	MAH_RS15265	BBJ32_RS15550	KV38_RS16390	BS641_RS18940	BEP52_RS16380	BJP78_RS16630	BJP74_RS16070	DFS55_RS08185	DBO90_RS10155	EX350_RS05940	FCV17_RS21435	FCV16_RS13975	FCV18_RS05470	JPH1_RS18325
MAV_RS02100	MAH_RS01975	BBJ32_RS10320	KV38_RS02035	BS641_RS01980	BEP52_RS01925	BJP78_RS01930	BJP74_RS01910	DFS55_RS22725	DBO90_RS04755	EX350_RS21745	FCV17_RS06890	FCV16_RS23610	FCV18_RS15095	JPH1_RS01930
MAV_RS02725	MAH_RS02430	BBJ32_RS12280	KV38_RS02505	BS641_RS02450	BEP52_RS02395	BJP78_RS02400	BJP74_RS02380	DFS55_RS22245	DBO90_RS00905	EX350_RS21265	FCV17_RS07360	FCV16_RS24080	FCV18_RS15565	JPH1_RS02410
MAV_RS21730	MAH_RS19315	BBJ32_RS06480	KV38_RS21105	BS641_RS22960	BEP52_RS20555	BJP78_RS20955	BJP74_RS20195	DFS55_RS03840	DBO90_RS19910	EX350_RS01845	FCV17_RS01300	FCV16_RS18040	FCV18_RS09545	JPH1_RS22345
MAV_RS11095	MAH_RS13725	BBJ32_RS20090	KV38_RS09885	BS641_RS12975	BEP52_RS14830	BJP78_RS15080	BJP74_RS11140	DFS55_RS14755	DBO90_RS10755	EX350_RS12675	FCV17_RS17150	FCV16_RS09690	FCV18_RS01180	JPH1_RS11780
MAV_RS05260	MAH_RS04680	BBJ32_RS03550	KV38_RS04890	BS641_RS06460	BEP52_RS05205	BJP78_RS05200	BJP74_RS04745	DFS55_RS19970	DBO90_RS15990	EX350_RS17680	FCV17_RS10145	FCV16_RS02680	FCV18_RS18900	JPH1_RS06495
MAV_RS23775	MAH_RS21380	BBJ32_RS08530	KV38_RS23235	BS641_RS25145	BEP52_RS22700	BJP78_RS23105	BJP74_RS22335	DFS55_RS01685	DBO90_RS22005	EX350_RS25310	FCV17_RS03480	FCV16_RS20220	FCV18_RS11710	JPH1_RS24535
MAV_RS07235	MAH_RS06490	BBJ32_RS01760	KV38_RS06805	BS641_RS16135	BEP52_RS07040	BJP78_RS07040	BJP74_RS06580	DFS55_RS17955	DBO90_RS14130	EX350_RS15675	FCV17_RS20025	FCV16_RS12565	FCV18_RS04060	JPH1_RS08820
MAV_RS05820	MAH_RS05325	BBJ32_RS02930	KV38_RS05550	BS641_RS07110	BEP52_RS05845	BJP78_RS05840	BJP74_RS05385	DFS55_RS19305	DBO90_RS15360	EX350_RS17020	FCV17_RS10715	FCV16_RS03255	FCV18_RS19565	JPH1_RS07165
MAV_RS21505	MAH_RS19090	BBJ32_RS06255	KV38_RS20860	BS641_RS22735	BEP52_RS20330	BJP78_RS20730	BJP74_RS19970	DFS55_RS04085	DBO90_RS19685	EX350_RS02090	FCV17_RS01055	FCV16_RS17795	FCV18_RS09300	JPH1_RS22120
MAV_RS17010	MAH_RS14545	BBJ32_RS16230	KV38_RS15695	BS641_RS18255	BEP52_RS15645	BJP78_RS15895	BJP74_RS15335	DFS55_RS08880	DBO90_RS09460	EX350_RS06640	FCV17_RS20745	FCV16_RS13285	FCV18_RS04780	JPH1_RS17630
MAV_RS11850	MAH_RS13000	BBJ32_RS20810	KV38_RS10895	BS641_RS12055	BEP52_RS14040	BJP78_RS14295	BJP74_RS11925	DFS55_RS13915	DBO90_RS08800	EX350_RS11760	FCV17_RS16365	FCV16_RS08905	FCV18_RS25245	JPH1_RS12555
MAV_RS02110	MAH_RS01985	BBJ32_RS10310	KV38_RS02045	BS641_RS01990	BEP52_RS01935	BJP78_RS01940	BJP74_RS01920	DFS55_RS22715	DBO90_RS04765	EX350_RS21735	FCV17_RS06900	FCV16_RS23620	FCV18_RS15105	JPH1_RS01940
MAV_RS22105	MAH_RS19710	BBJ32_RS06855	KV38_RS21505	BS641_RS23355	BEP52_RS20960	BJP78_RS21355	BJP74_RS20595	DFS55_RS03440	DBO90_RS20285	EX350_RS01430	FCV17_RS01675	FCV16_RS18415	FCV18_RS09920	JPH1_RS22720
MAV_RS18300	MAH_RS15905	BBJ32_RS15060	KV38_RS17060	BS641_RS19455	BEP52_RS16890	BJP78_RS17290	BJP74_RS16580	DFS55_RS07520	DBO90_RS02860	EX350_RS05405	FCV17_RS21955	FCV16_RS14490	FCV18_RS05990	JPH1_RS18840
MAV_RS04120	MAH_RS03475	BBJ32_RS13330	KV38_RS03685	BS641_RS05310	BEP52_RS03555	BJP78_RS03555	BJP74_RS03525	DFS55_RS21120	DBO90_RS17155	EX350_RS18840	FCV17_RS08985	FCV16_RS01520	FCV18_RS17745	JPH1_RS05330
MAV_RS04385	MAH_RS03750	BBJ32_RS13595	KV38_RS03950	BS641_RS05575	BEP52_RS03820	BJP78_RS03820	BJP74_RS03790	DFS55_RS20855	DBO90_RS16885	EX350_RS18570	FCV17_RS09250	FCV16_RS01785	FCV18_RS18010	JPH1_RS05595
MAV_RS05120	MAH_RS04540	BBJ32_RS03690	KV38_RS04745	BS641_RS06315	BEP52_RS05060	BJP78_RS05050	BJP74_RS04590	DFS55_RS20115	DBO90_RS16135	EX350_RS17825	FCV17_RS09995	FCV16_RS02530	FCV18_RS18755	JPH1_RS06350
MAV_RS21450	MAH_RS19035	BBJ32_RS06200	KV38_RS20805	BS641_RS22680	BEP52_RS20275	BJP78_RS20675	BJP74_RS19915	DFS55_RS04140	DBO90_RS19630	EX350_RS02145	FCV17_RS01000	FCV16_RS17740	FCV18_RS09245	JPH1_RS22065
MAV_RS15950	MAH_RS09720	BBJ32_RS17415	KV38_RS14655	BS641_RS16985	BEP52_RS10380	BJP78_RS10365	BJP74_RS10090	DFS55_RS09925	DBO90_RS05595	EX350_RS07755	FCV17_RS12600	FCV16_RS05145	FCV18_RS21465	JPH1_RS16475
MAV_RS11210	MAH_RS13590	BBJ32_RS20205	KV38_RS10230	BS641_RS12700	BEP52_RS14680	BJP78_RS14935	BJP74_RS11285	DFS55_RS14565	DBO90_RS10635	EX350_RS12415	FCV17_RS17030	FCV16_RS09570	FCV18_RS01060	JPH1_RS11900
MAV_RS22320	MAH_RS19930	BBJ32_RS07070	KV38_RS21745	BS641_RS23610	BEP52_RS21200	BJP78_RS21595	BJP74_RS20835	DFS55_RS03205	DBO90_RS20510	EX350_RS01195	FCV17_RS01915	FCV16_RS18655	FCV18_RS10160	JPH1_RS22955
MAV_RS01135	MAH_RS01220	BBJ32_RS11085	KV38_RS01125	BS641_RS01205	BEP52_RS01125	BJP78_RS01135	BJP74_RS01110	DFS55_RS23715	DBO90_RS03990	EX350_RS22650	FCV17_RS06075	FCV16_RS22795	FCV18_RS14280	JPH1_RS01135
MAV_RS26155	MAH_RS24025	BBJ32_RS23095	KV38_RS16535	BS641_RS19085	BEP52_RS16525	BJP78_RS16780	BJP74_RS16215	DFS55_RS08040	DBO90_RS10305	EX350_RS05795	FCV17_RS21585	FCV16_RS14125	FCV18_RS05620	JPH1_RS18475
MAV_RS18280	MAH_RS15885	BBJ32_RS15080	KV38_RS17040	BS641_RS19435	BEP52_RS16870	BJP78_RS17270	BJP74_RS16560	DFS55_RS07540	DBO90_RS02880	EX350_RS05425	FCV17_RS21935	FCV16_RS14470	FCV18_RS05970	JPH1_RS18820
MAV_RS20005	MAH_RS17595	BBJ32_RS04745	KV38_RS19330	BS641_RS21195	BEP52_RS18650	BJP78_RS19050	BJP74_RS18340	DFS55_RS05610	DBO90_RS18145	EX350_RS03675	FCV17_RS23670	FCV16_RS16215	FCV18_RS07715	JPH1_RS20555
MAV_RS03400	MAH_RS03040	BBJ32_RS12890	KV38_RS03125	BS641_RS03425	BEP52_RS03020	BJP78_RS03025	BJP74_RS02995	DFS55_RS21625	DBO90_RS01520	EX350_RS20650	FCV17_RS07980	FCV16_RS24700	FCV18_RS16185	JPH1_RS03025
MAV_RS22330	MAH_RS19940	BBJ32_RS07080	KV38_RS21755	BS641_RS23620	BEP52_RS21210	BJP78_RS21605	BJP74_RS20845	DFS55_RS03195	DBO90_RS20520	EX350_RS01185	FCV17_RS01925	FCV16_RS18665	FCV18_RS10170	JPH1_RS22965
MAV_RS24090	MAH_RS21695	BBJ32_RS08845	KV38_RS23560	BS641_RS25465	BEP52_RS22990	BJP78_RS23395	BJP74_RS22625	DFS55_RS01360	DBO90_RS22325	EX350_RS24990	FCV17_RS03800	FCV16_RS20540	FCV18_RS12030	JPH1_RS24860
MAV_RS02520	MAH_RS02225	BBJ32_RS12075	KV38_RS02295	BS641_RS02240	BEP52_RS02185	BJP78_RS02190	BJP74_RS02170	DFS55_RS22455	DBO90_RS03525	EX350_RS21475	FCV17_RS07150	FCV16_RS23870	FCV18_RS15355	JPH1_RS02200
MAV_RS04640	MAH_RS04050	BBJ32_RS13850	KV38_RS04250	BS641_RS05835	BEP52_RS04120	BJP78_RS04125	BJP74_RS04090	DFS55_RS20595	DBO90_RS16630	EX350_RS18310	FCV17_RS09510	FCV16_RS02045	FCV18_RS18270	JPH1_RS05855
MAV_RS11075	MAH_RS13745	BBJ32_RS20070	KV38_RS09865	BS641_RS12995	BEP52_RS14850	BJP78_RS15100	BJP74_RS11120	DFS55_RS14775	DBO90_RS10775	EX350_RS12695	FCV17_RS17170	FCV16_RS09710	FCV18_RS01200	JPH1_RS11760
MAV_RS15155	MAH_RS10480	BBJ32_RS18180	KV38_RS13820	BS641_RS08435	BEP52_RS11160	BJP78_RS11145	BJP74_RS14780	DFS55_RS10740	DBO90_RS06395	EX350_RS08515	FCV17_RS13390	FCV16_RS05930	FCV18_RS22240	JPH1_RS15725
MAV_RS02140	MAH_RS02015	BBJ32_RS10280	KV38_RS02075	BS641_RS02020	BEP52_RS01965	BJP78_RS01970	BJP74_RS01950	DFS55_RS22675	DBO90_RS04795	EX350_RS21695	FCV17_RS06930	FCV16_RS23650	FCV18_RS15135	JPH1_RS01980
MAV_RS16190	MAH_RS09500	BBJ32_RS17195	KV38_RS14880	BS641_RS17225	BEP52_RS10155	BJP78_RS10140	BJP74_RS09855	DFS55_RS09690	DBO90_RS05370	EX350_RS07535	FCV17_RS12385	FCV16_RS04925	FCV18_RS21245	JPH1_RS16710
MAV_RS20760	MAH_RS18340	BBJ32_RS05510	KV38_RS20105	BS641_RS21960	BEP52_RS19575	BJP78_RS19820	BJP74_RS19210	DFS55_RS04840	DBO90_RS18935	EX350_RS02885	FCV17_RS24480	FCV16_RS17015	FCV18_RS08520	JPH1_RS21335
MAV_RS00230	MAH_RS00340	BBJ32_RS11990	KV38_RS00235	BS641_RS00255	BEP52_RS00235	BJP78_RS00245	BJP74_RS00220	DFS55_RS00235	DBO90_RS00240	EX350_RS23540	FCV17_RS05200	FCV16_RS21915	FCV18_RS13410	JPH1_RS00255
MAV_RS10975	MAH_RS13855	BBJ32_RS19970	KV38_RS09750	BS641_RS13130	BEP52_RS14960	BJP78_RS15210	BJP74_RS11010	DFS55_RS14885	DBO90_RS10885	EX350_RS12805	FCV17_RS17280	FCV16_RS09820	FCV18_RS01310	JPH1_RS11650
MAV_RS21415	MAH_RS19000	BBJ32_RS06165	KV38_RS20770	BS641_RS22645	BEP52_RS20240	BJP78_RS20640	BJP74_RS19880	DFS55_RS04175	DBO90_RS19595	EX350_RS02180	FCV17_RS00965	FCV16_RS17705	FCV18_RS09210	JPH1_RS22030
MAV_RS23640	MAH_RS21245	BBJ32_RS08390	KV38_RS23095	BS641_RS25005	BEP52_RS22560	BJP78_RS22965	BJP74_RS22195	DFS55_RS01825	DBO90_RS21865	EX350_RS25450	FCV17_RS03340	FCV16_RS20080	FCV18_RS11570	JPH1_RS24395
MAV_RS20410	MAH_RS18000	BBJ32_RS05165	KV38_RS19750	BS641_RS21610	BEP52_RS19070	BJP78_RS19470	BJP74_RS18760	DFS55_RS05190	DBO90_RS18580	EX350_RS03255	FCV17_RS24130	FCV16_RS16665	FCV18_RS08170	JPH1_RS20975
MAV_RS08530	MAH_RS07780	BBJ32_RS00415	KV38_RS08280	BS641_RS14820	BEP52_RS08370	BJP78_RS08355	BJP74_RS07895	DFS55_RS16505	DBO90_RS12780	EX350_RS14360	FCV17_RS18735	FCV16_RS11275	FCV18_RS02765	JPH1_RS10110
MAV_RS15510	MAH_RS10155	BBJ32_RS17850	KV38_RS14160	BS641_RS16550	BEP52_RS10820	BJP78_RS10805	BJP74_RS15120	DFS55_RS10390	DBO90_RS06055	EX350_RS08175	FCV17_RS13015	FCV16_RS05560	FCV18_RS21880	JPH1_RS16060
MAV_RS21620	MAH_RS19205	BBJ32_RS06370	KV38_RS20995	BS641_RS22850	BEP52_RS20445	BJP78_RS20845	BJP74_RS20085	DFS55_RS03950	DBO90_RS19800	EX350_RS01955	FCV17_RS01190	FCV16_RS17930	FCV18_RS09435	JPH1_RS22235
MAV_RS02150	MAH_RS02025	BBJ32_RS10270	KV38_RS02085	BS641_RS02030	BEP52_RS01975	BJP78_RS01980	BJP74_RS01960	DFS55_RS22665	DBO90_RS04805	EX350_RS21685	FCV17_RS06940	FCV16_RS23660	FCV18_RS15145	JPH1_RS01990
MAV_RS19555	MAH_RS17165	BBJ32_RS04290	KV38_RS18775	BS641_RS20755	BEP52_RS18165	BJP78_RS18565	BJP74_RS17855	DFS55_RS06260	DBO90_RS17700	EX350_RS04115	FCV17_RS23245	FCV16_RS15780	FCV18_RS07280	JPH1_RS20115
MAV_RS25175	MAH_RS22400	BBJ32_RS09565	KV38_RS24250	BS641_RS26155	BEP52_RS23720	BJP78_RS24125	BJP74_RS23355	DFS55_RS00670	DBO90_RS23075	EX350_RS24300	FCV17_RS04485	FCV16_RS21225	FCV18_RS12715	JPH1_RS25545
MAV_RS15365	MAH_RS10280	BBJ32_RS17970	KV38_RS14030	BS641_RS16385	BEP52_RS10950	BJP78_RS10935	BJP74_RS14990	DFS55_RS10530	DBO90_RS06185	EX350_RS08300	FCV17_RS13160	FCV16_RS05700	FCV18_RS22010	JPH1_RS15935
MAV_RS07635	MAH_RS06910	BBJ32_RS01330	KV38_RS07260	BS641_RS15710	BEP52_RS07480	BJP78_RS07465	BJP74_RS07005	DFS55_RS17500	DBO90_RS13705	EX350_RS15255	FCV17_RS19625	FCV16_RS12165	FCV18_RS03655	JPH1_RS09225
MAV_RS02930	MAH_RS02635	BBJ32_RS12485	KV38_RS02710	BS641_RS02655	BEP52_RS02600	BJP78_RS02605	BJP74_RS02585	DFS55_RS22040	DBO90_RS01110	EX350_RS21060	FCV17_RS07565	FCV16_RS24285	FCV18_RS15770	JPH1_RS02615
MAV_RS20725	MAH_RS18305	BBJ32_RS05475	KV38_RS20065	BS641_RS21925	BEP52_RS19540	BJP78_RS19785	BJP74_RS19175	DFS55_RS04880	DBO90_RS18900	EX350_RS02925	FCV17_RS24440	FCV16_RS16975	FCV18_RS08480	JPH1_RS21295
MAV_RS03485	MAH_RS03125	BBJ32_RS12980	KV38_RS03210	BS641_RS03510	BEP52_RS03105	BJP78_RS03110	BJP74_RS03080	DFS55_RS21540	DBO90_RS17625	EX350_RS20565	FCV17_RS08065	FCV16_RS24785	FCV18_RS16270	JPH1_RS03110
MAV_RS17830	MAH_RS15375	BBJ32_RS15440	KV38_RS16500	BS641_RS19050	BEP52_RS16490	BJP78_RS16745	BJP74_RS16180	DFS55_RS08075	DBO90_RS10270	EX350_RS05830	FCV17_RS21550	FCV16_RS14090	FCV18_RS05585	JPH1_RS18440
MAV_RS02220	MAH_RS02095	BBJ32_RS10200	KV38_RS02160	BS641_RS02105	BEP52_RS02050	BJP78_RS02055	BJP74_RS02035	DFS55_RS22590	DBO90_RS04880	EX350_RS21610	FCV17_RS07015	FCV16_RS23735	FCV18_RS15220	JPH1_RS02065
MAV_RS06480	MAH_RS05960	BBJ32_RS02295	KV38_RS06210	BS641_RS07750	BEP52_RS06500	BJP78_RS06495	BJP74_RS06040	DFS55_RS18655	DBO90_RS14700	EX350_RS16360	FCV17_RS11420	FCV16_RS03960	FCV18_RS20280	JPH1_RS07830
MAV_RS02155	MAH_RS02030	BBJ32_RS10265	KV38_RS02090	BS641_RS02035	BEP52_RS01980	BJP78_RS01985	BJP74_RS01965	DFS55_RS22660	DBO90_RS04810	EX350_RS21680	FCV17_RS06945	FCV16_RS23665	FCV18_RS15150	JPH1_RS01995
MAV_RS10395	MAH_RS14255	BBJ32_RS19565	KV38_RS09340	BS641_RS13535	BEP52_RS15365	BJP78_RS15615	BJP74_RS10605	DFS55_RS15290	DBO90_RS11290	EX350_RS13215	FCV17_RS17690	FCV16_RS10230	FCV18_RS01720	JPH1_RS11240
MAV_RS08550	MAH_RS07800	BBJ32_RS00395	KV38_RS08305	BS641_RS14800	BEP52_RS08395	BJP78_RS08380	BJP74_RS07920	DFS55_RS16480	DBO90_RS12755	EX350_RS14335	FCV17_RS18710	FCV16_RS11250	FCV18_RS02740	JPH1_RS10135
MAV_RS00960	MAH_RS01045	BBJ32_RS11260	KV38_RS00945	BS641_RS01010	BEP52_RS00945	BJP78_RS00955	BJP74_RS00930	DFS55_RS23895	DBO90_RS03805	EX350_RS22830	FCV17_RS05895	FCV16_RS22615	FCV18_RS14100	JPH1_RS00955
MAV_RS03370	MAH_RS03010	BBJ32_RS12860	KV38_RS03090	BS641_RS03395	BEP52_RS02990	BJP78_RS02995	BJP74_RS02965	DFS55_RS21660	DBO90_RS01490	EX350_RS20680	FCV17_RS07950	FCV16_RS24670	FCV18_RS16155	JPH1_RS02995
MAV_RS01880	MAH_RS01745	BBJ32_RS10540	KV38_RS01810	BS641_RS01755	BEP52_RS01690	BJP78_RS01695	BJP74_RS01675	DFS55_RS22955	DBO90_RS04530	EX350_RS21985	FCV17_RS06660	FCV16_RS23380	FCV18_RS14865	JPH1_RS01700
MAV_RS13715	MAH_RS11875	BBJ32_RS21860	KV38_RS11910	BS641_RS10510	BEP52_RS12935	BJP78_RS12920	BJP74_RS13010	DFS55_RS12755	DBO90_RS07715	EX350_RS10530	FCV17_RS15250	FCV16_RS07790	FCV18_RS24130	JPH1_RS13660
MAV_RS07295	MAH_RS06550	BBJ32_RS01700	KV38_RS06865	BS641_RS16075	BEP52_RS07100	BJP78_RS07100	BJP74_RS06640	DFS55_RS17895	DBO90_RS14070	EX350_RS15615	FCV17_RS19965	FCV16_RS12505	FCV18_RS04000	JPH1_RS08880
MAV_RS22495	MAH_RS20105	BBJ32_RS07245	KV38_RS21935	BS641_RS23805	BEP52_RS21390	BJP78_RS21790	BJP74_RS21025	DFS55_RS03010	DBO90_RS20700	EX350_RS01000	FCV17_RS02105	FCV16_RS18845	FCV18_RS10350	JPH1_RS23145
MAV_RS14640	MAH_RS10975	BBJ32_RS22645	KV38_RS13315	BS641_RS08940	BEP52_RS11670	BJP78_RS11655	BJP74_RS14275	DFS55_RS11275	DBO90_RS06925	EX350_RS09055	FCV17_RS13925	FCV16_RS06465	FCV18_RS22775	JPH1_RS15185
MAV_RS01700	MAH_RS01565	BBJ32_RS10725	KV38_RS01495	BS641_RS01565	BEP52_RS01495	BJP78_RS01500	BJP74_RS01480	DFS55_RS23265	DBO90_RS04345	EX350_RS22180	FCV17_RS06470	FCV16_RS23190	FCV18_RS14675	JPH1_RS01510
MAV_RS02165	MAH_RS02040	BBJ32_RS10255	KV38_RS02100	BS641_RS02045	BEP52_RS01990	BJP78_RS01995	BJP74_RS01975	DFS55_RS22650	DBO90_RS04820	EX350_RS21670	FCV17_RS06955	FCV16_RS23675	FCV18_RS15160	JPH1_RS02005
MAV_RS25370	MAH_RS22595	BBJ32_RS09760	KV38_RS24445	BS641_RS26350	BEP52_RS23915	BJP78_RS24320	BJP74_RS23550	DFS55_RS00475	DBO90_RS23270	EX350_RS24105	FCV17_RS04715	FCV16_RS21430	FCV18_RS12920	JPH1_RS25740
MAV_RS03665	MAH_RS03310	BBJ32_RS13160	KV38_RS03385	BS641_RS03685	BEP52_RS03285	BJP78_RS03290	BJP74_RS03260	DFS55_RS21365	DBO90_RS17440	EX350_RS20390	FCV17_RS08240	FCV16_RS24960	FCV18_RS16445	JPH1_RS03285
MAV_RS02870	MAH_RS02575	BBJ32_RS12425	KV38_RS02650	BS641_RS02595	BEP52_RS02540	BJP78_RS02545	BJP74_RS02525	DFS55_RS22100	DBO90_RS01050	EX350_RS21120	FCV17_RS07505	FCV16_RS24225	FCV18_RS15710	JPH1_RS02555
MAV_RS19445	MAH_RS17050	BBJ32_RS04175	KV38_RS18665	BS641_RS20645	BEP52_RS18050	BJP78_RS18450	BJP74_RS17740	DFS55_RS06370	DBO90_RS01650	EX350_RS04225	FCV17_RS23135	FCV16_RS15670	FCV18_RS07170	JPH1_RS20005
MAV_RS15735	MAH_RS09935	BBJ32_RS17630	KV38_RS14440	BS641_RS16770	BEP52_RS10595	BJP78_RS10580	BJP74_RS10305	DFS55_RS10140	DBO90_RS05810	EX350_RS07970	FCV17_RS12815	FCV16_RS05360	FCV18_RS21680	JPH1_RS16260
MAV_RS07525	MAH_RS06780	BBJ32_RS01450	KV38_RS07150	BS641_RS15820	BEP52_RS07365	BJP78_RS07335	BJP74_RS06875	DFS55_RS17610	DBO90_RS13840	EX350_RS15365	FCV17_RS19735	FCV16_RS12275	FCV18_RS03765	JPH1_RS09115
MAV_RS15845	MAH_RS09825	BBJ32_RS17520	KV38_RS14550	BS641_RS16880	BEP52_RS10485	BJP78_RS10470	BJP74_RS10195	DFS55_RS10030	DBO90_RS05700	EX350_RS07860	FCV17_RS12705	FCV16_RS05250	FCV18_RS21570	JPH1_RS16370
MAV_RS19705	MAH_RS17315	BBJ32_RS04440	KV38_RS18930	BS641_RS20905	BEP52_RS18320	BJP78_RS18720	BJP74_RS18010	DFS55_RS06105	DBO90_RS17850	EX350_RS03960	FCV17_RS23395	FCV16_RS15930	FCV18_RS07430	JPH1_RS20270
MAV_RS01865	MAH_RS01730	BBJ32_RS10555	KV38_RS01790	BS641_RS01740	BEP52_RS01670	BJP78_RS01675	BJP74_RS01655	DFS55_RS22975	DBO90_RS04515	EX350_RS22005	FCV17_RS06640	FCV16_RS23360	FCV18_RS14845	JPH1_RS01680
MAV_RS13335	MAH_RS12245	BBJ32_RS21490	KV38_RS11530	BS641_RS10890	BEP52_RS13310	BJP78_RS13295	BJP74_RS12635	DFS55_RS13130	DBO90_RS08090	EX350_RS10900	FCV17_RS15625	FCV16_RS08165	FCV18_RS24505	JPH1_RS13285
MAV_RS02230	MAH_RS02105	BBJ32_RS10190	KV38_RS02170	BS641_RS02115	BEP52_RS02060	BJP78_RS02065	BJP74_RS02045	DFS55_RS22580	DBO90_RS04890	EX350_RS21600	FCV17_RS07025	FCV16_RS23745	FCV18_RS15230	JPH1_RS02075
MAV_RS20495	MAH_RS18085	BBJ32_RS05250	KV38_RS19840	BS641_RS21700	BEP52_RS19160	BJP78_RS19560	BJP74_RS18850	DFS55_RS05100	DBO90_RS18670	EX350_RS03165	FCV17_RS24220	FCV16_RS16755	FCV18_RS08260	JPH1_RS21065
MAV_RS02895	MAH_RS02600	BBJ32_RS12450	KV38_RS02675	BS641_RS02620	BEP52_RS02565	BJP78_RS02570	BJP74_RS02550	DFS55_RS22075	DBO90_RS01075	EX350_RS21095	FCV17_RS07530	FCV16_RS24250	FCV18_RS15735	JPH1_RS02580
MAV_RS17300	MAH_RS14825	BBJ32_RS15955	KV38_RS15970	BS641_RS18525	BEP52_RS15920	BJP78_RS16170	BJP74_RS15610	DFS55_RS08605	DBO90_RS09735	EX350_RS06360	FCV17_RS21015	FCV16_RS13555	FCV18_RS05050	JPH1_RS17905
MAV_RS22205	MAH_RS19810	BBJ32_RS06955	KV38_RS21610	BS641_RS23455	BEP52_RS21065	BJP78_RS21460	BJP74_RS20700	DFS55_RS03335	DBO90_RS20390	EX350_RS01325	FCV17_RS01780	FCV16_RS18520	FCV18_RS10025	JPH1_RS22825
MAV_RS25320	MAH_RS22545	BBJ32_RS09710	KV38_RS24395	BS641_RS26300	BEP52_RS23865	BJP78_RS24270	BJP74_RS23500	DFS55_RS00525	DBO90_RS23220	EX350_RS24155	FCV17_RS04665	FCV16_RS21380	FCV18_RS12870	JPH1_RS25690
MAV_RS17870	MAH_RS15415	BBJ32_RS15400	KV38_RS16545	BS641_RS19095	BEP52_RS16535	BJP78_RS16790	BJP74_RS16225	DFS55_RS08030	DBO90_RS10315	EX350_RS05785	FCV17_RS21595	FCV16_RS14135	FCV18_RS05630	JPH1_RS18485
MAV_RS13365	MAH_RS12215	BBJ32_RS21520	KV38_RS11560	BS641_RS10860	BEP52_RS13280	BJP78_RS13265	BJP74_RS12665	DFS55_RS13100	DBO90_RS08060	EX350_RS10870	FCV17_RS15595	FCV16_RS08135	FCV18_RS24475	JPH1_RS13315
MAV_RS19390	MAH_RS16990	BBJ32_RS04125	KV38_RS18610	BS641_RS20590	BEP52_RS17995	BJP78_RS18395	BJP74_RS17685	DFS55_RS06425	DBO90_RS01705	EX350_RS04280	FCV17_RS23070	FCV16_RS15605	FCV18_RS07105	JPH1_RS19950
MAV_RS21185	MAH_RS18770	BBJ32_RS05935	KV38_RS20540	BS641_RS22415	BEP52_RS20010	BJP78_RS20260	BJP74_RS19650	DFS55_RS04405	DBO90_RS19365	EX350_RS02410	FCV17_RS00735	FCV16_RS17475	FCV18_RS08980	JPH1_RS21800
MAV_RS05470	MAH_RS04975	BBJ32_RS03280	KV38_RS05195	BS641_RS06740	BEP52_RS05490	BJP78_RS05485	BJP74_RS05030	DFS55_RS19675	DBO90_RS15715	EX350_RS17375	FCV17_RS10360	FCV16_RS02900	FCV18_RS19210	JPH1_RS06775
MAV_RS02235	MAH_RS02110	BBJ32_RS10185	KV38_RS02175	BS641_RS02120	BEP52_RS02065	BJP78_RS02070	BJP74_RS02050	DFS55_RS22575	DBO90_RS04895	EX350_RS21595	FCV17_RS07030	FCV16_RS23750	FCV18_RS15235	JPH1_RS02080
MAV_RS09985	MAH_RS08405	BBJ32_RS19175	KV38_RS08930	BS641_RS14160	BEP52_RS09020	BJP78_RS09005	BJP74_RS08555	DFS55_RS15875	DBO90_RS11710	EX350_RS13655	FCV17_RS18110	FCV16_RS10650	FCV18_RS02140	JPH1_RS10790
MAV_RS24040	MAH_RS21645	BBJ32_RS08795	KV38_RS23510	BS641_RS25415	BEP52_RS22940	BJP78_RS23345	BJP74_RS22575	DFS55_RS01410	DBO90_RS22275	EX350_RS25040	FCV17_RS03750	FCV16_RS20490	FCV18_RS11980	JPH1_RS24810
MAV_RS02025	MAH_RS01900	BBJ32_RS10395	KV38_RS01955	BS641_RS01900	BEP52_RS01840	BJP78_RS01845	BJP74_RS01825	DFS55_RS22810	DBO90_RS04675	EX350_RS21830	FCV17_RS06805	FCV16_RS23525	FCV18_RS15010	JPH1_RS01845
MAV_RS15780	MAH_RS09890	BBJ32_RS17585	KV38_RS14485	BS641_RS16815	BEP52_RS10550	BJP78_RS10535	BJP74_RS10260	DFS55_RS10095	DBO90_RS05765	EX350_RS07925	FCV17_RS12770	FCV16_RS05315	FCV18_RS21635	JPH1_RS16305
MAV_RS19220	MAH_RS16825	BBJ32_RS03955	KV38_RS18440	BS641_RS20420	BEP52_RS17825	BJP78_RS18225	BJP74_RS17515	DFS55_RS06595	DBO90_RS01875	EX350_RS04450	FCV17_RS22900	FCV16_RS15435	FCV18_RS06935	JPH1_RS19780
MAV_RS02845	MAH_RS02550	BBJ32_RS12400	KV38_RS02625	BS641_RS02570	BEP52_RS02515	BJP78_RS02520	BJP74_RS02500	DFS55_RS22125	DBO90_RS01025	EX350_RS21145	FCV17_RS07480	FCV16_RS24200	FCV18_RS15685	JPH1_RS02530
MAV_RS13830	MAH_RS11760	BBJ32_RS21975	KV38_RS12025	BS641_RS10395	BEP52_RS12820	BJP78_RS12805	BJP74_RS13125	DFS55_RS12640	DBO90_RS07600	EX350_RS10415	FCV17_RS15135	FCV16_RS07675	FCV18_RS24010	JPH1_RS13775
MAV_RS06260	MAH_RS05735	BBJ32_RS02515	KV38_RS05990	BS641_RS07530	BEP52_RS06280	BJP78_RS06275	BJP74_RS05820	DFS55_RS18875	DBO90_RS14920	EX350_RS16580	FCV17_RS11200	FCV16_RS03740	FCV18_RS20050	JPH1_RS07610
MAV_RS03525	MAH_RS03165	BBJ32_RS13020	KV38_RS03250	BS641_RS03550	BEP52_RS03145	BJP78_RS03150	BJP74_RS03120	DFS55_RS21500	DBO90_RS17585	EX350_RS20525	FCV17_RS08105	FCV16_RS24825	FCV18_RS16310	JPH1_RS03150
MAV_RS23910	MAH_RS21515	BBJ32_RS08665	KV38_RS23370	BS641_RS25280	BEP52_RS22835	BJP78_RS23240	BJP74_RS22470	DFS55_RS01550	DBO90_RS22140	EX350_RS25175	FCV17_RS03615	FCV16_RS20355	FCV18_RS11845	JPH1_RS24670
MAV_RS02250	MAH_RS02125	BBJ32_RS10170	KV38_RS02190	BS641_RS02135	BEP52_RS02080	BJP78_RS02085	BJP74_RS02065	DFS55_RS22560	DBO90_RS04910	EX350_RS21580	FCV17_RS07045	FCV16_RS23765	FCV18_RS15250	JPH1_RS02095
MAV_RS02925	MAH_RS02630	BBJ32_RS12480	KV38_RS02705	BS641_RS02650	BEP52_RS02595	BJP78_RS02600	BJP74_RS02580	DFS55_RS22045	DBO90_RS01105	EX350_RS21065	FCV17_RS07560	FCV16_RS24280	FCV18_RS15765	JPH1_RS02610
MAV_RS18380	MAH_RS15985	BBJ32_RS14980	KV38_RS17140	BS641_RS19535	BEP52_RS16970	BJP78_RS17370	BJP74_RS16660	DFS55_RS07440	DBO90_RS02780	EX350_RS05325	FCV17_RS22035	FCV16_RS14570	FCV18_RS06070	JPH1_RS18920
MAV_RS06660	MAH_RS06145	BBJ32_RS02105	KV38_RS06400	BS641_RS07940	BEP52_RS06690	BJP78_RS06685	BJP74_RS06230	DFS55_RS18460	DBO90_RS14505	EX350_RS16165	FCV17_RS11610	FCV16_RS04150	FCV18_RS20470	JPH1_RS08020
MAV_RS20940	MAH_RS18525	BBJ32_RS05690	KV38_RS20285	BS641_RS22165	BEP52_RS19755	BJP78_RS20005	BJP74_RS19395	DFS55_RS04660	DBO90_RS19115	EX350_RS02665	FCV17_RS00480	FCV16_RS17220	FCV18_RS08725	JPH1_RS21545
MAV_RS05050	MAH_RS04475	BBJ32_RS03760	KV38_RS04680	BS641_RS06250	BEP52_RS04995	BJP78_RS04985	BJP74_RS04525	DFS55_RS20180	DBO90_RS16205	EX350_RS17890	FCV17_RS09930	FCV16_RS02465	FCV18_RS18690	JPH1_RS06285
MAV_RS15895	MAH_RS09775	BBJ32_RS17470	KV38_RS14600	BS641_RS16930	BEP52_RS10435	BJP78_RS10420	BJP74_RS10145	DFS55_RS09980	DBO90_RS05650	EX350_RS07810	FCV17_RS12655	FCV16_RS05200	FCV18_RS21520	JPH1_RS16420
MAV_RS06130	MAH_RS05605	BBJ32_RS02650	KV38_RS05845	BS641_RS07395	BEP52_RS06135	BJP78_RS06130	BJP74_RS05675	DFS55_RS19020	DBO90_RS15065	EX350_RS16730	FCV17_RS11055	FCV16_RS03595	FCV18_RS19905	JPH1_RS07465
MAV_RS08545	MAH_RS07795	BBJ32_RS00400	KV38_RS08300	BS641_RS14805	BEP52_RS08390	BJP78_RS08375	BJP74_RS07915	DFS55_RS16485	DBO90_RS12760	EX350_RS14340	FCV17_RS18715	FCV16_RS11255	FCV18_RS02745	JPH1_RS10130
MAV_RS17410	MAH_RS14930	BBJ32_RS15850	KV38_RS16080	BS641_RS18635	BEP52_RS16030	BJP78_RS16280	BJP74_RS15720	DFS55_RS08495	DBO90_RS09845	EX350_RS06250	FCV17_RS21125	FCV16_RS13665	FCV18_RS05160	JPH1_RS18015
MAV_RS04410	MAH_RS03775	BBJ32_RS13620	KV38_RS03980	BS641_RS05605	BEP52_RS03850	BJP78_RS03850	BJP74_RS03820	DFS55_RS20825	DBO90_RS16855	EX350_RS18540	FCV17_RS09280	FCV16_RS01815	FCV18_RS18040	JPH1_RS05625
MAV_RS02270	MAH_RS02145	BBJ32_RS10150	KV38_RS02215	BS641_RS02160	BEP52_RS02105	BJP78_RS02110	BJP74_RS02090	DFS55_RS22535	DBO90_RS04935	EX350_RS21555	FCV17_RS07070	FCV16_RS23790	FCV18_RS15275	JPH1_RS02120
MAV_RS21845	MAH_RS19430	BBJ32_RS06595	KV38_RS21220	BS641_RS23075	BEP52_RS20670	BJP78_RS21070	BJP74_RS20310	DFS55_RS03725	DBO90_RS20025	EX350_RS01730	FCV17_RS01415	FCV16_RS18155	FCV18_RS09660	JPH1_RS22460
MAV_RS20770	MAH_RS18350	BBJ32_RS05520	KV38_RS20115	BS641_RS21970	BEP52_RS19585	BJP78_RS19830	BJP74_RS19220	DFS55_RS04830	DBO90_RS18945	EX350_RS02875	FCV17_RS24490	FCV16_RS17025	FCV18_RS08530	JPH1_RS21345
MAV_RS19765	MAH_RS17375	BBJ32_RS04500	KV38_RS18990	BS641_RS20965	BEP52_RS18380	BJP78_RS18780	BJP74_RS18070	DFS55_RS06045	DBO90_RS17910	EX350_RS03900	FCV17_RS23455	FCV16_RS15990	FCV18_RS07490	JPH1_RS20330
MAV_RS25040	MAH_RS22270	BBJ32_RS09430	KV38_RS24115	BS641_RS26020	BEP52_RS23590	BJP78_RS23995	BJP74_RS23225	DFS55_RS00805	DBO90_RS22935	EX350_RS24435	FCV17_RS04350	FCV16_RS21090	FCV18_RS12580	JPH1_RS25410
MAV_RS13935	MAH_RS11655	BBJ32_RS22075	KV38_RS12135	BS641_RS10295	BEP52_RS12720	BJP78_RS12705	BJP74_RS13225	DFS55_RS12525	DBO90_RS07500	EX350_RS10310	FCV17_RS15010	FCV16_RS07550	FCV18_RS23885	JPH1_RS13895
MAV_RS24055	MAH_RS21660	BBJ32_RS08810	KV38_RS23525	BS641_RS25430	BEP52_RS22955	BJP78_RS23360	BJP74_RS22590	DFS55_RS01395	DBO90_RS22290	EX350_RS25025	FCV17_RS03765	FCV16_RS20505	FCV18_RS11995	JPH1_RS24825
MAV_RS00515	MAH_RS00630	BBJ32_RS11700	KV38_RS00530	BS641_RS00545	BEP52_RS00530	BJP78_RS00540	BJP74_RS00515	DFS55_RS24335	DBO90_RS00535	EX350_RS23245	FCV17_RS05480	FCV16_RS22195	FCV18_RS13685	JPH1_RS00540
MAV_RS14990	MAH_RS10640	BBJ32_RS18340	KV38_RS13650	BS641_RS08600	BEP52_RS11330	BJP78_RS11315	BJP74_RS14610	DFS55_RS10905	DBO90_RS06575	EX350_RS08685	FCV17_RS13560	FCV16_RS06100	FCV18_RS22410	JPH1_RS15555
MAV_RS06275	MAH_RS05750	BBJ32_RS02500	KV38_RS06005	BS641_RS07545	BEP52_RS06295	BJP78_RS06290	BJP74_RS05835	DFS55_RS18860	DBO90_RS14905	EX350_RS16565	FCV17_RS11215	FCV16_RS03755	FCV18_RS20065	JPH1_RS07625
MAV_RS05370	MAH_RS04825	BBJ32_RS03435	KV38_RS05045	BS641_RS06580	BEP52_RS05340	BJP78_RS05335	BJP74_RS04880	DFS55_RS19835	DBO90_RS15865	EX350_RS17525	FCV17_RS10305	FCV16_RS02845	FCV18_RS19060	JPH1_RS06625
MAV_RS03210	MAH_RS02915	BBJ32_RS12765	KV38_RS02990	BS641_RS03280	BEP52_RS02890	BJP78_RS02895	BJP74_RS02865	DFS55_RS21760	DBO90_RS01390	EX350_RS20780	FCV17_RS07850	FCV16_RS24570	FCV18_RS16055	JPH1_RS02895
MAV_RS24080	MAH_RS21685	BBJ32_RS08835	KV38_RS23550	BS641_RS25455	BEP52_RS22980	BJP78_RS23385	BJP74_RS22615	DFS55_RS01370	DBO90_RS22315	EX350_RS25000	FCV17_RS03790	FCV16_RS20530	FCV18_RS12020	JPH1_RS24850
MAV_RS16680	MAH_RS09005	BBJ32_RS16680	KV38_RS15375	BS641_RS17895	BEP52_RS09635	BJP78_RS09630	BJP74_RS09185	DFS55_RS09200	DBO90_RS03325	EX350_RS06995	FCV17_RS20390	FCV16_RS12930	FCV18_RS04425	JPH1_RS17280
MAV_RS20430	MAH_RS18020	BBJ32_RS05185	KV38_RS19770	BS641_RS21630	BEP52_RS19090	BJP78_RS19490	BJP74_RS18780	DFS55_RS05170	DBO90_RS18600	EX350_RS03235	FCV17_RS24150	FCV16_RS16685	FCV18_RS08190	JPH1_RS20995
MAV_RS20415	MAH_RS18005	BBJ32_RS05170	KV38_RS19755	BS641_RS21615	BEP52_RS19075	BJP78_RS19475	BJP74_RS18765	DFS55_RS05185	DBO90_RS18585	EX350_RS03250	FCV17_RS24135	FCV16_RS16670	FCV18_RS08175	JPH1_RS20980
MAV_RS15865	MAH_RS09805	BBJ32_RS17500	KV38_RS14570	BS641_RS16900	BEP52_RS10465	BJP78_RS10450	BJP74_RS10175	DFS55_RS10010	DBO90_RS05680	EX350_RS07840	FCV17_RS12685	FCV16_RS05230	FCV18_RS21550	JPH1_RS16390
MAV_RS21595	MAH_RS19180	BBJ32_RS06345	KV38_RS20950	BS641_RS22825	BEP52_RS20420	BJP78_RS20820	BJP74_RS20060	DFS55_RS03995	DBO90_RS19775	EX350_RS02000	FCV17_RS01145	FCV16_RS17885	FCV18_RS09390	JPH1_RS22210
MAV_RS18445	MAH_RS16050	BBJ32_RS14915	KV38_RS17205	BS641_RS19600	BEP52_RS17040	BJP78_RS17435	BJP74_RS16730	DFS55_RS07375	DBO90_RS02715	EX350_RS05245	FCV17_RS22100	FCV16_RS14635	FCV18_RS06135	JPH1_RS18985
MAV_RS05020	MAH_RS04445	BBJ32_RS03790	KV38_RS04650	BS641_RS06220	BEP52_RS04965	BJP78_RS04955	BJP74_RS04495	DFS55_RS20210	DBO90_RS16235	EX350_RS17920	FCV17_RS09900	FCV16_RS02435	FCV18_RS18660	JPH1_RS06255
MAV_RS20500	MAH_RS18090	BBJ32_RS05255	KV38_RS19845	BS641_RS21705	BEP52_RS19165	BJP78_RS19565	BJP74_RS18855	DFS55_RS05095	DBO90_RS18675	EX350_RS03160	FCV17_RS24225	FCV16_RS16760	FCV18_RS08265	JPH1_RS21070
MAV_RS20965	MAH_RS18550	BBJ32_RS05715	KV38_RS20310	BS641_RS22190	BEP52_RS19780	BJP78_RS20030	BJP74_RS19420	DFS55_RS04635	DBO90_RS19140	EX350_RS02640	FCV17_RS00505	FCV16_RS17245	FCV18_RS08750	JPH1_RS21570
MAV_RS21610	MAH_RS19195	BBJ32_RS06360	KV38_RS20985	BS641_RS22840	BEP52_RS20435	BJP78_RS20835	BJP74_RS20075	DFS55_RS03960	DBO90_RS19790	EX350_RS01965	FCV17_RS01180	FCV16_RS17920	FCV18_RS09425	JPH1_RS22225
MAV_RS02885	MAH_RS02590	BBJ32_RS12440	KV38_RS02665	BS641_RS02610	BEP52_RS02555	BJP78_RS02560	BJP74_RS02540	DFS55_RS22085	DBO90_RS01065	EX350_RS21105	FCV17_RS07520	FCV16_RS24240	FCV18_RS15725	JPH1_RS02570
MAV_RS05480	MAH_RS04985	BBJ32_RS03270	KV38_RS05205	BS641_RS06750	BEP52_RS05500	BJP78_RS05495	BJP74_RS05040	DFS55_RS19665	DBO90_RS15705	EX350_RS17365	FCV17_RS10370	FCV16_RS02910	FCV18_RS19220	JPH1_RS06785
MAV_RS12875	MAH_RS12705	BBJ32_RS20995	KV38_RS11135	BS641_RS11395	BEP52_RS13735	BJP78_RS13760	BJP74_RS12205	DFS55_RS13565	DBO90_RS08610	EX350_RS11390	FCV17_RS16125	FCV16_RS08665	FCV18_RS25005	JPH1_RS12800
MAV_RS23595	MAH_RS21200	BBJ32_RS08345	KV38_RS23050	BS641_RS24960	BEP52_RS22515	BJP78_RS22920	BJP74_RS22150	DFS55_RS01870	DBO90_RS21820	EX350_RS25495	FCV17_RS03295	FCV16_RS20035	FCV18_RS11525	JPH1_RS24350
MAV_RS14625	MAH_RS10990	BBJ32_RS22630	KV38_RS13300	BS641_RS08955	BEP52_RS11685	BJP78_RS11670	BJP74_RS14260	DFS55_RS11290	DBO90_RS06940	EX350_RS09070	FCV17_RS13940	FCV16_RS06480	FCV18_RS22790	JPH1_RS15170
MAV_RS01550	MAH_RS01420	BBJ32_RS10885	KV38_RS01335	BS641_RS01410	BEP52_RS01335	BJP78_RS01340	BJP74_RS01315	DFS55_RS23510	DBO90_RS04200	EX350_RS22440	FCV17_RS06285	FCV16_RS23005	FCV18_RS14490	JPH1_RS01350
MAV_RS04920	MAH_RS04340	BBJ32_RS14130	KV38_RS04540	BS641_RS06115	BEP52_RS04410	BJP78_RS04415	BJP74_RS04380	DFS55_RS20315	DBO90_RS16350	EX350_RS18030	FCV17_RS09790	FCV16_RS02325	FCV18_RS18550	JPH1_RS06145
MAV_RS11325	MAH_RS13480	BBJ32_RS20335	KV38_RS10345	BS641_RS12590	BEP52_RS14565	BJP78_RS14820	BJP74_RS11400	DFS55_RS14445	DBO90_RS09295	EX350_RS12305	FCV17_RS16915	FCV16_RS09455	FCV18_RS00945	JPH1_RS12010
MAV_RS02445	MAH_RS02150	BBJ32_RS10145	KV38_RS02220	BS641_RS02165	BEP52_RS02110	BJP78_RS02115	BJP74_RS02095	DFS55_RS22530	DBO90_RS04940	EX350_RS21550	FCV17_RS07075	FCV16_RS23795	FCV18_RS15280	JPH1_RS02125
MAV_RS19960	MAH_RS17550	BBJ32_RS04700	KV38_RS19285	BS641_RS21150	BEP52_RS18605	BJP78_RS19005	BJP74_RS18295	DFS55_RS05655	DBO90_RS18100	EX350_RS03720	FCV17_RS23625	FCV16_RS16170	FCV18_RS07670	JPH1_RS20510
MAV_RS02610	MAH_RS02315	BBJ32_RS12165	KV38_RS02390	BS641_RS02335	BEP52_RS02280	BJP78_RS02285	BJP74_RS02265	DFS55_RS22360	DBO90_RS00790	EX350_RS21380	FCV17_RS07245	FCV16_RS23965	FCV18_RS15450	JPH1_RS02295
MAV_RS17630	MAH_RS15180	BBJ32_RS15635	KV38_RS16305	BS641_RS18855	BEP52_RS16295	BJP78_RS16545	BJP74_RS15985	DFS55_RS08270	DBO90_RS10070	EX350_RS06030	FCV17_RS21345	FCV16_RS13885	FCV18_RS05380	JPH1_RS18240
MAV_RS06925	MAH_RS06410	BBJ32_RS01845	KV38_RS06665	BS641_RS08210	BEP52_RS06955	BJP78_RS06955	BJP74_RS06495	DFS55_RS18195	DBO90_RS14225	EX350_RS15900	FCV17_RS11875	FCV16_RS04415	FCV18_RS20735	JPH1_RS08285
MAV_RS03245	MAH_RS02950	BBJ32_RS12800	KV38_RS03030	BS641_RS03315	BEP52_RS02930	BJP78_RS02935	BJP74_RS02905	DFS55_RS21720	DBO90_RS01430	EX350_RS20740	FCV17_RS07890	FCV16_RS24610	FCV18_RS16095	JPH1_RS02935
MAV_RS20340	MAH_RS17930	BBJ32_RS05090	KV38_RS19680	BS641_RS21540	BEP52_RS19000	BJP78_RS19400	BJP74_RS18690	DFS55_RS05260	DBO90_RS18505	EX350_RS03325	FCV17_RS24060	FCV16_RS16595	FCV18_RS08100	JPH1_RS20905
MAV_RS15070	MAH_RS10560	BBJ32_RS18260	KV38_RS13735	BS641_RS08515	BEP52_RS11245	BJP78_RS11230	BJP74_RS14695	DFS55_RS10820	DBO90_RS06480	EX350_RS08600	FCV17_RS13475	FCV16_RS06015	FCV18_RS22325	JPH1_RS15640
MAV_RS05765	MAH_RS05270	BBJ32_RS02985	KV38_RS05495	BS641_RS07055	BEP52_RS05790	BJP78_RS05785	BJP74_RS05330	DFS55_RS19360	DBO90_RS15415	EX350_RS17075	FCV17_RS10660	FCV16_RS03200	FCV18_RS19510	JPH1_RS07110
MAV_RS18835	MAH_RS16445	BBJ32_RS14525	KV38_RS17615	BS641_RS20015	BEP52_RS17440	BJP78_RS17840	BJP74_RS17130	DFS55_RS06970	DBO90_RS02320	EX350_RS04835	FCV17_RS22515	FCV16_RS15050	FCV18_RS06550	JPH1_RS19395
MAV_RS19335	MAH_RS16935	BBJ32_RS04070	KV38_RS18555	BS641_RS20535	BEP52_RS17940	BJP78_RS18340	BJP74_RS17630	DFS55_RS06480	DBO90_RS01760	EX350_RS04335	FCV17_RS23015	FCV16_RS15550	FCV18_RS07050	JPH1_RS19895
MAV_RS02455	MAH_RS02160	BBJ32_RS10135	KV38_RS02230	BS641_RS02175	BEP52_RS02120	BJP78_RS02125	BJP74_RS02105	DFS55_RS22520	DBO90_RS04950	EX350_RS21540	FCV17_RS07085	FCV16_RS23805	FCV18_RS15290	JPH1_RS02135
MAV_RS15405	MAH_RS10240	BBJ32_RS17930	KV38_RS14070	BS641_RS16425	BEP52_RS10910	BJP78_RS10895	BJP74_RS15030	DFS55_RS10490	DBO90_RS06145	EX350_RS08260	FCV17_RS13120	FCV16_RS05660	FCV18_RS21970	JPH1_RS15975
MAV_RS10530	MAH_RS14120	BBJ32_RS19700	KV38_RS09475	BS641_RS13400	BEP52_RS15230	BJP78_RS15480	BJP74_RS10740	DFS55_RS15155	DBO90_RS11155	EX350_RS13080	FCV17_RS17555	FCV16_RS10095	FCV18_RS01585	JPH1_RS11375
MAV_RS14550	MAH_RS11065	BBJ32_RS22525	KV38_RS12745	BS641_RS09690	BEP52_RS12130	BJP78_RS12115	BJP74_RS13815	DFS55_RS11915	DBO90_RS07050	EX350_RS09745	FCV17_RS14385	FCV16_RS06925	FCV18_RS23525	JPH1_RS14490
MAV_RS19415	MAH_RS17015	BBJ32_RS04150	KV38_RS18635	BS641_RS20615	BEP52_RS18020	BJP78_RS18420	BJP74_RS17710	DFS55_RS06400	DBO90_RS01680	EX350_RS04255	FCV17_RS23105	FCV16_RS15640	FCV18_RS07140	JPH1_RS19975
MAV_RS18975	MAH_RS16580	BBJ32_RS14390	KV38_RS17750	BS641_RS20150	BEP52_RS17575	BJP78_RS17975	BJP74_RS17265	DFS55_RS06840	DBO90_RS02185	EX350_RS04700	FCV17_RS22650	FCV16_RS15185	FCV18_RS06685	JPH1_RS19530
MAV_RS22650	MAH_RS20260	BBJ32_RS07400	KV38_RS22090	BS641_RS23960	BEP52_RS21545	BJP78_RS21945	BJP74_RS21180	DFS55_RS02845	DBO90_RS20855	EX350_RS00845	FCV17_RS02260	FCV16_RS19000	FCV18_RS10500	JPH1_RS23300
MAV_RS00275	MAH_RS00385	BBJ32_RS11945	KV38_RS00280	BS641_RS00300	BEP52_RS00280	BJP78_RS00290	BJP74_RS00265	DFS55_RS00280	DBO90_RS00285	EX350_RS23495	FCV17_RS05245	FCV16_RS21960	FCV18_RS13455	JPH1_RS00300
MAV_RS05855	MAH_RS05360	BBJ32_RS02895	KV38_RS05585	BS641_RS07145	BEP52_RS05880	BJP78_RS05875	BJP74_RS05420	DFS55_RS19270	DBO90_RS15325	EX350_RS16985	FCV17_RS10750	FCV16_RS03290	FCV18_RS19600	JPH1_RS07200
MAV_RS00975	MAH_RS01060	BBJ32_RS11245	KV38_RS00960	BS641_RS01025	BEP52_RS00960	BJP78_RS00970	BJP74_RS00945	DFS55_RS23880	DBO90_RS03820	EX350_RS22815	FCV17_RS05910	FCV16_RS22630	FCV18_RS14115	JPH1_RS00970
MAV_RS00835	MAH_RS00920	BBJ32_RS11385	KV38_RS00820	BS641_RS00885	BEP52_RS00820	BJP78_RS00830	BJP74_RS00805	DFS55_RS24020	DBO90_RS03680	EX350_RS22955	FCV17_RS05770	FCV16_RS22490	FCV18_RS13975	JPH1_RS00830
MAV_RS02460	MAH_RS02165	BBJ32_RS10130	KV38_RS02235	BS641_RS02180	BEP52_RS02125	BJP78_RS02130	BJP74_RS02110	DFS55_RS22515	DBO90_RS04955	EX350_RS21535	FCV17_RS07090	FCV16_RS23810	FCV18_RS15295	JPH1_RS02140
MAV_RS15100	MAH_RS10535	BBJ32_RS18235	KV38_RS13765	BS641_RS08490	BEP52_RS11215	BJP78_RS11200	BJP74_RS14725	DFS55_RS10795	DBO90_RS06450	EX350_RS08570	FCV17_RS13445	FCV16_RS05985	FCV18_RS22295	JPH1_RS15670
MAV_RS17325	MAH_RS14850	BBJ32_RS15930	KV38_RS16000	BS641_RS18555	BEP52_RS15950	BJP78_RS16200	BJP74_RS15640	DFS55_RS08575	DBO90_RS09765	EX350_RS06330	FCV17_RS21045	FCV16_RS13585	FCV18_RS05080	JPH1_RS17935
MAV_RS22190	MAH_RS19795	BBJ32_RS06940	KV38_RS21595	BS641_RS23440	BEP52_RS21050	BJP78_RS21445	BJP74_RS20685	DFS55_RS03350	DBO90_RS20375	EX350_RS01340	FCV17_RS01765	FCV16_RS18505	FCV18_RS10010	JPH1_RS22810
MAV_RS17700	MAH_RS15250	BBJ32_RS15565	KV38_RS16375	BS641_RS18925	BEP52_RS16365	BJP78_RS16615	BJP74_RS16055	DFS55_RS08200	DBO90_RS10140	EX350_RS05955	FCV17_RS21420	FCV16_RS13960	FCV18_RS05455	JPH1_RS18310
MAV_RS20640	MAH_RS18225	BBJ32_RS05390	KV38_RS19985	BS641_RS21845	BEP52_RS19460	BJP78_RS19705	BJP74_RS19095	DFS55_RS04960	DBO90_RS18810	EX350_RS03005	FCV17_RS24360	FCV16_RS16895	FCV18_RS08400	JPH1_RS21215
MAV_RS12995	MAH_RS12580	BBJ32_RS21115	KV38_RS11215	BS641_RS11260	BEP52_RS13655	BJP78_RS13640	BJP74_RS12285	DFS55_RS13445	DBO90_RS08480	EX350_RS11265	FCV17_RS15975	FCV16_RS08515	FCV18_RS24855	JPH1_RS12920
MAV_RS06145	MAH_RS05620	BBJ32_RS02635	KV38_RS05860	BS641_RS07410	BEP52_RS06150	BJP78_RS06145	BJP74_RS05690	DFS55_RS19005	DBO90_RS15050	EX350_RS16715	FCV17_RS11070	FCV16_RS03610	FCV18_RS19920	JPH1_RS07480
MAV_RS21175	MAH_RS18760	BBJ32_RS05925	KV38_RS20530	BS641_RS22405	BEP52_RS20000	BJP78_RS20250	BJP74_RS19640	DFS55_RS04415	DBO90_RS19355	EX350_RS02420	FCV17_RS00725	FCV16_RS17465	FCV18_RS08970	JPH1_RS21790
MAV_RS18750	MAH_RS16360	BBJ32_RS14605	KV38_RS17520	BS641_RS19920	BEP52_RS17350	BJP78_RS17750	BJP74_RS17040	DFS55_RS07060	DBO90_RS02405	EX350_RS04930	FCV17_RS22415	FCV16_RS14950	FCV18_RS06450	JPH1_RS19300
MAV_RS02495	MAH_RS02200	BBJ32_RS10095	KV38_RS02270	BS641_RS02215	BEP52_RS02160	BJP78_RS02165	BJP74_RS02145	DFS55_RS22480	DBO90_RS04990	EX350_RS21500	FCV17_RS07125	FCV16_RS23845	FCV18_RS15330	JPH1_RS02175
MAV_RS02545	MAH_RS02250	BBJ32_RS12100	KV38_RS02320	BS641_RS02265	BEP52_RS02210	BJP78_RS02215	BJP74_RS02195	DFS55_RS22430	DBO90_RS03550	EX350_RS21450	FCV17_RS07175	FCV16_RS23895	FCV18_RS15380	JPH1_RS02225
MAV_RS02560	MAH_RS02265	BBJ32_RS12115	KV38_RS02335	BS641_RS02280	BEP52_RS02225	BJP78_RS02230	BJP74_RS02210	DFS55_RS22415	DBO90_RS00740	EX350_RS21435	FCV17_RS07190	FCV16_RS23910	FCV18_RS15395	JPH1_RS02240
MAV_RS18670	MAH_RS16275	BBJ32_RS14690	KV38_RS17435	BS641_RS19840	BEP52_RS17265	BJP78_RS17665	BJP74_RS16955	DFS55_RS07145	DBO90_RS02490	EX350_RS05015	FCV17_RS22330	FCV16_RS14865	FCV18_RS06365	JPH1_RS19215
MAV_RS02620	MAH_RS02325	BBJ32_RS12175	KV38_RS02400	BS641_RS02345	BEP52_RS02290	BJP78_RS02295	BJP74_RS02275	DFS55_RS22350	DBO90_RS00800	EX350_RS21370	FCV17_RS07255	FCV16_RS23975	FCV18_RS15460	JPH1_RS02305
MAV_RS02660	MAH_RS02365	BBJ32_RS12215	KV38_RS02440	BS641_RS02385	BEP52_RS02330	BJP78_RS02335	BJP74_RS02315	DFS55_RS22310	DBO90_RS00840	EX350_RS21330	FCV17_RS07295	FCV16_RS24015	FCV18_RS15500	JPH1_RS02345
MAV_RS05380	MAH_RS04835	BBJ32_RS03425	KV38_RS05055	BS641_RS06590	BEP52_RS05350	BJP78_RS05345	BJP74_RS04890	DFS55_RS19825	DBO90_RS15855	EX350_RS17515	FCV17_RS10315	FCV16_RS02855	FCV18_RS19070	JPH1_RS06635
MAV_RS14540	MAH_RS11075	BBJ32_RS22535	KV38_RS12735	BS641_RS09700	BEP52_RS12140	BJP78_RS12125	BJP74_RS13805	DFS55_RS11925	DBO90_RS07040	EX350_RS09755	FCV17_RS14395	FCV16_RS06935	FCV18_RS23535	JPH1_RS14480
MAV_RS11710	MAH_RS13140	BBJ32_RS20670	KV38_RS10745	BS641_RS12195	BEP52_RS14180	BJP78_RS14435	BJP74_RS11785	DFS55_RS14065	DBO90_RS08945	EX350_RS11900	FCV17_RS16515	FCV16_RS09055	FCV18_RS25395	JPH1_RS12415
MAV_RS18610	MAH_RS16215	BBJ32_RS14750	KV38_RS17370	BS641_RS19765	BEP52_RS17205	BJP78_RS17600	BJP74_RS16895	DFS55_RS07210	DBO90_RS02550	EX350_RS05080	FCV17_RS22265	FCV16_RS14800	FCV18_RS06300	JPH1_RS19150
MAV_RS02240	MAH_RS02115	BBJ32_RS10180	KV38_RS02180	BS641_RS02125	BEP52_RS02070	BJP78_RS02075	BJP74_RS02055	DFS55_RS22570	DBO90_RS04900	EX350_RS21590	FCV17_RS07035	FCV16_RS23755	FCV18_RS15240	JPH1_RS02085
MAV_RS06445	MAH_RS05920	BBJ32_RS02330	KV38_RS06175	BS641_RS07715	BEP52_RS06465	BJP78_RS06460	BJP74_RS06005	DFS55_RS18690	DBO90_RS14735	EX350_RS16395	FCV17_RS11385	FCV16_RS03925	FCV18_RS20245	JPH1_RS07795
MAV_RS06575	MAH_RS06060	BBJ32_RS02195	KV38_RS06315	BS641_RS07855	BEP52_RS06605	BJP78_RS06600	BJP74_RS06145	DFS55_RS18550	DBO90_RS14595	EX350_RS16255	FCV17_RS11525	FCV16_RS04065	FCV18_RS20385	JPH1_RS07935
MAV_RS11980	MAH_RS12885	BBJ32_RS20925	KV38_RS11010	BS641_RS11940	BEP52_RS13925	BJP78_RS14180	BJP74_RS12040	DFS55_RS13800	DBO90_RS08685	EX350_RS11645	FCV17_RS16250	FCV16_RS08790	FCV18_RS25130	JPH1_RS12670
MAV_RS02980	MAH_RS02685	BBJ32_RS12535	KV38_RS02760	BS641_RS02705	BEP52_RS02650	BJP78_RS02655	BJP74_RS02635	DFS55_RS21990	DBO90_RS01160	EX350_RS21010	FCV17_RS07615	FCV16_RS24335	FCV18_RS15820	JPH1_RS02665
MAV_RS16230	MAH_RS09460	BBJ32_RS17155	KV38_RS14920	BS641_RS17265	BEP52_RS10115	BJP78_RS10100	BJP74_RS09815	DFS55_RS09650	DBO90_RS05330	EX350_RS07495	FCV17_RS12345	FCV16_RS04885	FCV18_RS21205	JPH1_RS16750
MAV_RS04300	MAH_RS03665	BBJ32_RS13510	KV38_RS03865	BS641_RS05490	BEP52_RS03735	BJP78_RS03735	BJP74_RS03705	DFS55_RS20940	DBO90_RS16970	EX350_RS18655	FCV17_RS09165	FCV16_RS01700	FCV18_RS17925	JPH1_RS05510
MAV_RS00880	MAH_RS00965	BBJ32_RS11340	KV38_RS00865	BS641_RS00930	BEP52_RS00865	BJP78_RS00875	BJP74_RS00850	DFS55_RS23975	DBO90_RS03725	EX350_RS22910	FCV17_RS05815	FCV16_RS22535	FCV18_RS14020	JPH1_RS00875
MAV_RS23720	MAH_RS21325	BBJ32_RS08475	KV38_RS23180	BS641_RS25090	BEP52_RS22645	BJP78_RS23050	BJP74_RS22280	DFS55_RS01740	DBO90_RS21950	EX350_RS25365	FCV17_RS03425	FCV16_RS20165	FCV18_RS11655	JPH1_RS24480
MAV_RS06010	MAH_RS05485	BBJ32_RS02770	KV38_RS05720	BS641_RS07275	BEP52_RS06015	BJP78_RS06010	BJP74_RS05555	DFS55_RS19140	DBO90_RS15185	EX350_RS16855	FCV17_RS10930	FCV16_RS03470	FCV18_RS19780	JPH1_RS07340
MAV_RS04660	MAH_RS04080	BBJ32_RS13870	KV38_RS04280	BS641_RS05855	BEP52_RS04150	BJP78_RS04155	BJP74_RS04120	DFS55_RS20575	DBO90_RS16610	EX350_RS18290	FCV17_RS09530	FCV16_RS02065	FCV18_RS18290	JPH1_RS05875
MAV_RS07420	MAH_RS06675	BBJ32_RS01575	KV38_RS07005	BS641_RS15925	BEP52_RS07225	BJP78_RS07225	BJP74_RS06765	DFS55_RS17745	DBO90_RS13945	EX350_RS15475	FCV17_RS19840	FCV16_RS12380	FCV18_RS03875	JPH1_RS09005
MAV_RS14720	MAH_RS10895	BBJ32_RS22725	KV38_RS13395	BS641_RS08860	BEP52_RS11590	BJP78_RS11575	BJP74_RS14355	DFS55_RS11195	DBO90_RS06845	EX350_RS08975	FCV17_RS13845	FCV16_RS06385	FCV18_RS22695	JPH1_RS15265
MAV_RS13435	MAH_RS12145	BBJ32_RS21590	KV38_RS11635	BS641_RS10785	BEP52_RS13205	BJP78_RS13190	BJP74_RS12740	DFS55_RS13025	DBO90_RS07985	EX350_RS10795	FCV17_RS15520	FCV16_RS08060	FCV18_RS24400	JPH1_RS13390
MAV_RS02745	MAH_RS02450	BBJ32_RS12300	KV38_RS02525	BS641_RS02470	BEP52_RS02415	BJP78_RS02420	BJP74_RS02400	DFS55_RS22225	DBO90_RS00925	EX350_RS21245	FCV17_RS07380	FCV16_RS24100	FCV18_RS15585	JPH1_RS02430
MAV_RS11635	MAH_RS13215	BBJ32_RS20600	KV38_RS10675	BS641_RS12265	BEP52_RS14250	BJP78_RS14505	BJP74_RS11715	DFS55_RS14135	DBO90_RS09015	EX350_RS11970	FCV17_RS16585	FCV16_RS09125	FCV18_RS25465	JPH1_RS12345
MAV_RS02855	MAH_RS02560	BBJ32_RS12410	KV38_RS02635	BS641_RS02580	BEP52_RS02525	BJP78_RS02530	BJP74_RS02510	DFS55_RS22115	DBO90_RS01035	EX350_RS21135	FCV17_RS07490	FCV16_RS24210	FCV18_RS15695	JPH1_RS02540
MAV_RS15710	MAH_RS09960	BBJ32_RS17655	KV38_RS14415	BS641_RS16745	BEP52_RS10620	BJP78_RS10605	BJP74_RS10330	DFS55_RS10165	DBO90_RS05835	EX350_RS07995	FCV17_RS12840	FCV16_RS05385	FCV18_RS21705	JPH1_RS16235
MAV_RS11035	MAH_RS13785	BBJ32_RS20030	KV38_RS09825	BS641_RS13060	BEP52_RS14890	BJP78_RS15140	BJP74_RS11080	DFS55_RS14815	DBO90_RS10815	EX350_RS12735	FCV17_RS17210	FCV16_RS09750	FCV18_RS01240	JPH1_RS11720
MAV_RS04140	MAH_RS03495	BBJ32_RS13350	KV38_RS03705	BS641_RS05330	BEP52_RS03575	BJP78_RS03575	BJP74_RS03545	DFS55_RS21100	DBO90_RS17135	EX350_RS18820	FCV17_RS09005	FCV16_RS01540	FCV18_RS17765	JPH1_RS05350
MAV_RS03685	MAH_RS03330	BBJ32_RS13180	KV38_RS03405	BS641_RS03705	BEP52_RS03305	BJP78_RS03310	BJP74_RS03280	DFS55_RS21345	DBO90_RS17420	EX350_RS20370	FCV17_RS08260	FCV16_RS24980	FCV18_RS16465	JPH1_RS03305
MAV_RS22195	MAH_RS19800	BBJ32_RS06945	KV38_RS21600	BS641_RS23445	BEP52_RS21055	BJP78_RS21450	BJP74_RS20690	DFS55_RS03345	DBO90_RS20380	EX350_RS01335	FCV17_RS01770	FCV16_RS18510	FCV18_RS10015	JPH1_RS22815
MAV_RS20600	MAH_RS18185	BBJ32_RS05350	KV38_RS19940	BS641_RS21805	BEP52_RS19420	BJP78_RS19665	BJP74_RS19055	DFS55_RS05000	DBO90_RS18770	EX350_RS03045	FCV17_RS24320	FCV16_RS16855	FCV18_RS08360	JPH1_RS21175
MAV_RS21410	MAH_RS18995	BBJ32_RS06160	KV38_RS20765	BS641_RS22640	BEP52_RS20235	BJP78_RS20635	BJP74_RS19875	DFS55_RS04180	DBO90_RS19590	EX350_RS02185	FCV17_RS00960	FCV16_RS17700	FCV18_RS09205	JPH1_RS22025
MAV_RS22830	MAH_RS20440	BBJ32_RS07580	KV38_RS22270	BS641_RS24140	BEP52_RS21725	BJP78_RS22125	BJP74_RS21360	DFS55_RS02655	DBO90_RS21035	EX350_RS00665	FCV17_RS02465	FCV16_RS19205	FCV18_RS10705	JPH1_RS23505
MAV_RS02815	MAH_RS02520	BBJ32_RS12370	KV38_RS02595	BS641_RS02540	BEP52_RS02485	BJP78_RS02490	BJP74_RS02470	DFS55_RS22155	DBO90_RS00995	EX350_RS21175	FCV17_RS07450	FCV16_RS24170	FCV18_RS15655	JPH1_RS02500
MAV_RS16685	MAH_RS09000	BBJ32_RS16675	KV38_RS15380	BS641_RS17900	BEP52_RS09630	BJP78_RS09625	BJP74_RS09180	DFS55_RS09195	DBO90_RS03320	EX350_RS06990	FCV17_RS20395	FCV16_RS12935	FCV18_RS04430	JPH1_RS17285
MAV_RS15185	MAH_RS10450	BBJ32_RS18150	KV38_RS13850	BS641_RS08405	BEP52_RS11130	BJP78_RS11115	BJP74_RS14810	DFS55_RS10710	DBO90_RS06365	EX350_RS08485	FCV17_RS13360	FCV16_RS05900	FCV18_RS22210	JPH1_RS15755
MAV_RS06750	MAH_RS06235	BBJ32_RS02015	KV38_RS06490	BS641_RS08030	BEP52_RS06780	BJP78_RS06775	BJP74_RS06320	DFS55_RS18370	DBO90_RS14415	EX350_RS16075	FCV17_RS11700	FCV16_RS04240	FCV18_RS20560	JPH1_RS08110
MAV_RS17905	MAH_RS15450	BBJ32_RS15365	KV38_RS16585	BS641_RS19130	BEP52_RS16575	BJP78_RS16830	BJP74_RS16265	DFS55_RS07990	DBO90_RS10355	EX350_RS05745	FCV17_RS21635	FCV16_RS14175	FCV18_RS05670	JPH1_RS18520
MAV_RS13885	MAH_RS11700	BBJ32_RS22030	KV38_RS12085	BS641_RS10340	BEP52_RS12765	BJP78_RS12750	BJP74_RS13180	DFS55_RS12580	DBO90_RS07545	EX350_RS10360	FCV17_RS15080	FCV16_RS07620	FCV18_RS23955	JPH1_RS13830
MAV_RS18390	MAH_RS15995	BBJ32_RS14970	KV38_RS17150	BS641_RS19545	BEP52_RS16980	BJP78_RS17380	BJP74_RS16670	DFS55_RS07430	DBO90_RS02770	EX350_RS05315	FCV17_RS22045	FCV16_RS14580	FCV18_RS06080	JPH1_RS18930
MAV_RS00105	MAH_RS00230	BBJ32_RS09985	KV38_RS00110	BS641_RS00145	BEP52_RS00115	BJP78_RS00115	BJP74_RS00115	DFS55_RS00105	DBO90_RS00100	EX350_RS23670	FCV17_RS04980	FCV16_RS21695	FCV18_RS13185	JPH1_RS00140
MAV_RS22365	MAH_RS19975	BBJ32_RS07115	KV38_RS21795	BS641_RS23660	BEP52_RS21250	BJP78_RS21645	BJP74_RS20885	DFS55_RS03155	DBO90_RS20560	EX350_RS01145	FCV17_RS01965	FCV16_RS18705	FCV18_RS10210	JPH1_RS23005
MAV_RS13725	MAH_RS11865	BBJ32_RS21870	KV38_RS11920	BS641_RS10500	BEP52_RS12925	BJP78_RS12910	BJP74_RS13020	DFS55_RS12745	DBO90_RS07705	EX350_RS10520	FCV17_RS15240	FCV16_RS07780	FCV18_RS24115	JPH1_RS13670
MAV_RS16810	MAH_RS08875	BBJ32_RS16550	KV38_RS15505	BS641_RS18025	BEP52_RS09505	BJP78_RS09500	BJP74_RS09055	DFS55_RS09070	DBO90_RS03195	EX350_RS06865	FCV17_RS20520	FCV16_RS13060	FCV18_RS04555	JPH1_RS17410
MAV_RS08320	MAH_RS07570	BBJ32_RS00625	KV38_RS08070	BS641_RS15030	BEP52_RS08160	BJP78_RS08145	BJP74_RS07685	DFS55_RS16715	DBO90_RS12990	EX350_RS14570	FCV17_RS18945	FCV16_RS11485	FCV18_RS02975	JPH1_RS09900
MAV_RS13350	MAH_RS12230	BBJ32_RS21505	KV38_RS11545	BS641_RS10875	BEP52_RS13295	BJP78_RS13280	BJP74_RS12650	DFS55_RS13115	DBO90_RS08075	EX350_RS10885	FCV17_RS15610	FCV16_RS08150	FCV18_RS24490	JPH1_RS13300
MAV_RS20780	MAH_RS18360	BBJ32_RS05530	KV38_RS20125	BS641_RS21980	BEP52_RS19595	BJP78_RS19840	BJP74_RS19230	DFS55_RS04820	DBO90_RS18955	EX350_RS02865	FCV17_RS24500	FCV16_RS17035	FCV18_RS08540	JPH1_RS21355
MAV_RS17555	MAH_RS15105	BBJ32_RS15710	KV38_RS16225	BS641_RS18775	BEP52_RS16215	BJP78_RS16465	BJP74_RS15905	DFS55_RS08350	DBO90_RS09990	EX350_RS06110	FCV17_RS21265	FCV16_RS13805	FCV18_RS05300	JPH1_RS18160
MAV_RS04900	MAH_RS04320	BBJ32_RS14110	KV38_RS04520	BS641_RS06095	BEP52_RS04390	BJP78_RS04395	BJP74_RS04360	DFS55_RS20335	DBO90_RS16370	EX350_RS18050	FCV17_RS09770	FCV16_RS02305	FCV18_RS18530	JPH1_RS06125
MAV_RS07215	MAH_RS06470	BBJ32_RS01780	KV38_RS06780	BS641_RS16160	BEP52_RS07015	BJP78_RS07015	BJP74_RS06555	DFS55_RS17980	DBO90_RS14155	EX350_RS15700	FCV17_RS20050	FCV16_RS12590	FCV18_RS04085	JPH1_RS08795
MAV_RS06050	MAH_RS05525	BBJ32_RS02730	KV38_RS05760	BS641_RS07315	BEP52_RS06055	BJP78_RS06050	BJP74_RS05595	DFS55_RS19100	DBO90_RS15145	EX350_RS16810	FCV17_RS10970	FCV16_RS03510	FCV18_RS19820	JPH1_RS07380
MAV_RS10715	MAH_RS14020	BBJ32_RS19805	KV38_RS09580	BS641_RS13295	BEP52_RS15125	BJP78_RS15375	BJP74_RS10845	DFS55_RS15050	DBO90_RS11050	EX350_RS12975	FCV17_RS17450	FCV16_RS09990	FCV18_RS01480	JPH1_RS11480
MAV_RS02070	MAH_RS01945	BBJ32_RS10350	KV38_RS02005	BS641_RS01950	BEP52_RS01895	BJP78_RS01900	BJP74_RS01880	DFS55_RS22755	DBO90_RS04725	EX350_RS21775	FCV17_RS06860	FCV16_RS23580	FCV18_RS15065	JPH1_RS01900
MAV_RS22410	MAH_RS20020	BBJ32_RS07160	KV38_RS21845	BS641_RS23710	BEP52_RS21300	BJP78_RS21695	BJP74_RS20935	DFS55_RS03105	DBO90_RS20610	EX350_RS01095	FCV17_RS02015	FCV16_RS18755	FCV18_RS10260	JPH1_RS23055
MAV_RS02945	MAH_RS02650	BBJ32_RS12500	KV38_RS02725	BS641_RS02670	BEP52_RS02615	BJP78_RS02620	BJP74_RS02600	DFS55_RS22025	DBO90_RS01125	EX350_RS21045	FCV17_RS07580	FCV16_RS24300	FCV18_RS15785	JPH1_RS02630
MAV_RS01190	MAH_RS01275	BBJ32_RS11030	KV38_RS01180	BS641_RS01260	BEP52_RS01180	BJP78_RS01190	BJP74_RS01165	DFS55_RS23660	DBO90_RS04045	EX350_RS22595	FCV17_RS06130	FCV16_RS22850	FCV18_RS14335	JPH1_RS01190
MAV_RS21195	MAH_RS18780	BBJ32_RS05945	KV38_RS20550	BS641_RS22425	BEP52_RS20020	BJP78_RS20270	BJP74_RS19660	DFS55_RS04395	DBO90_RS19375	EX350_RS02400	FCV17_RS00745	FCV16_RS17485	FCV18_RS08990	JPH1_RS21810
MAV_RS23350	MAH_RS20955	BBJ32_RS08100	KV38_RS22800	BS641_RS24710	BEP52_RS22260	BJP78_RS22660	BJP74_RS21900	DFS55_RS02125	DBO90_RS21565	EX350_RS00065	FCV17_RS03040	FCV16_RS19780	FCV18_RS11270	JPH1_RS24095
MAV_RS13915	MAH_RS11675	BBJ32_RS22055	KV38_RS12115	BS641_RS10315	BEP52_RS12740	BJP78_RS12725	BJP74_RS13205	DFS55_RS12545	DBO90_RS07520	EX350_RS10330	FCV17_RS15030	FCV16_RS07570	FCV18_RS23905	JPH1_RS13875
MAV_RS24630	MAH_RS21820	BBJ32_RS09000	KV38_RS23685	BS641_RS25590	BEP52_RS23115	BJP78_RS23520	BJP74_RS22750	DFS55_RS01235	DBO90_RS22485	EX350_RS24865	FCV17_RS03925	FCV16_RS20665	FCV18_RS12155	JPH1_RS24985
MAV_RS07645	MAH_RS06920	BBJ32_RS01320	KV38_RS07270	BS641_RS15700	BEP52_RS07490	BJP78_RS07475	BJP74_RS07015	DFS55_RS17490	DBO90_RS13695	EX350_RS15245	FCV17_RS19615	FCV16_RS12155	FCV18_RS03645	JPH1_RS09235
MAV_RS22930	MAH_RS20540	BBJ32_RS07680	KV38_RS22375	BS641_RS24245	BEP52_RS21830	BJP78_RS22230	BJP74_RS21465	DFS55_RS02550	DBO90_RS21140	EX350_RS00555	FCV17_RS02570	FCV16_RS19310	FCV18_RS10810	JPH1_RS23610
MAV_RS19295	MAH_RS16895	BBJ32_RS04030	KV38_RS18515	BS641_RS20495	BEP52_RS17900	BJP78_RS18300	BJP74_RS17590	DFS55_RS06520	DBO90_RS01800	EX350_RS04375	FCV17_RS22975	FCV16_RS15510	FCV18_RS07010	JPH1_RS19855
MAV_RS09690	MAH_RS08125	BBJ32_RS18900	KV38_RS08645	BS641_RS14445	BEP52_RS08745	BJP78_RS08730	BJP74_RS08280	DFS55_RS16150	DBO90_RS11985	EX350_RS13930	FCV17_RS18385	FCV16_RS10925	FCV18_RS02415	JPH1_RS10510
MAV_RS02735	MAH_RS02440	BBJ32_RS12290	KV38_RS02515	BS641_RS02460	BEP52_RS02405	BJP78_RS02410	BJP74_RS02390	DFS55_RS22235	DBO90_RS00915	EX350_RS21255	FCV17_RS07370	FCV16_RS24090	FCV18_RS15575	JPH1_RS02420
MAV_RS02955	MAH_RS02660	BBJ32_RS12510	KV38_RS02735	BS641_RS02680	BEP52_RS02625	BJP78_RS02630	BJP74_RS02610	DFS55_RS22015	DBO90_RS01135	EX350_RS21035	FCV17_RS07590	FCV16_RS24310	FCV18_RS15795	JPH1_RS02640
MAV_RS13795	MAH_RS11795	BBJ32_RS21940	KV38_RS11990	BS641_RS10430	BEP52_RS12855	BJP78_RS12840	BJP74_RS13090	DFS55_RS12675	DBO90_RS07635	EX350_RS10450	FCV17_RS15170	FCV16_RS07710	FCV18_RS24045	JPH1_RS13740
MAV_RS15145	MAH_RS10490	BBJ32_RS18190	KV38_RS13810	BS641_RS08445	BEP52_RS11170	BJP78_RS11155	BJP74_RS14770	DFS55_RS10750	DBO90_RS06405	EX350_RS08525	FCV17_RS13400	FCV16_RS05940	FCV18_RS22250	JPH1_RS15715
MAV_RS21215	MAH_RS18800	BBJ32_RS05965	KV38_RS20570	BS641_RS22445	BEP52_RS20040	BJP78_RS20290	BJP74_RS19680	DFS55_RS04375	DBO90_RS19395	EX350_RS02380	FCV17_RS00765	FCV16_RS17505	FCV18_RS09010	JPH1_RS21830
MAV_RS15275	MAH_RS10360	BBJ32_RS18060	KV38_RS13940	BS641_RS16295	BEP52_RS11040	BJP78_RS11025	BJP74_RS14900	DFS55_RS10620	DBO90_RS06275	EX350_RS08390	FCV17_RS13270	FCV16_RS05810	FCV18_RS22120	JPH1_RS15845
MAV_RS18095	MAH_RS15640	BBJ32_RS15175	KV38_RS16780	BS641_RS19325	BEP52_RS16770	BJP78_RS17025	BJP74_RS16460	DFS55_RS07795	DBO90_RS02980	EX350_RS05545	FCV17_RS21830	FCV16_RS14365	FCV18_RS05865	JPH1_RS18715
MAV_RS19225	MAH_RS16830	BBJ32_RS03960	KV38_RS18445	BS641_RS20425	BEP52_RS17830	BJP78_RS18230	BJP74_RS17520	DFS55_RS06590	DBO90_RS01870	EX350_RS04445	FCV17_RS22905	FCV16_RS15440	FCV18_RS06940	JPH1_RS19785
MAV_RS03145	MAH_RS02850	BBJ32_RS12700	KV38_RS02925	BS641_RS03215	BEP52_RS02825	BJP78_RS02830	BJP74_RS02800	DFS55_RS21825	DBO90_RS01325	EX350_RS20845	FCV17_RS07785	FCV16_RS24505	FCV18_RS15990	JPH1_RS02830
MAV_RS17725	MAH_RS15275	BBJ32_RS15540	KV38_RS16400	BS641_RS18950	BEP52_RS16390	BJP78_RS16640	BJP74_RS16080	DFS55_RS08175	DBO90_RS10165	EX350_RS05930	FCV17_RS21445	FCV16_RS13985	FCV18_RS05480	JPH1_RS18335
MAV_RS05355	MAH_RS04810	BBJ32_RS03450	KV38_RS05030	BS641_RS06565	BEP52_RS05325	BJP78_RS05320	BJP74_RS04865	DFS55_RS19850	DBO90_RS15880	EX350_RS17540	FCV17_RS10290	FCV16_RS02830	FCV18_RS19045	JPH1_RS06610
MAV_RS23635	MAH_RS21240	BBJ32_RS08385	KV38_RS23090	BS641_RS25000	BEP52_RS22555	BJP78_RS22960	BJP74_RS22190	DFS55_RS01830	DBO90_RS21860	EX350_RS25455	FCV17_RS03335	FCV16_RS20075	FCV18_RS11565	JPH1_RS24390
MAV_RS23590	MAH_RS21195	BBJ32_RS08340	KV38_RS23045	BS641_RS24955	BEP52_RS22510	BJP78_RS22915	BJP74_RS22145	DFS55_RS01875	DBO90_RS21815	EX350_RS25500	FCV17_RS03290	FCV16_RS20030	FCV18_RS11520	JPH1_RS24345
MAV_RS19625	MAH_RS17235	BBJ32_RS04360	KV38_RS18845	BS641_RS20825	BEP52_RS18235	BJP78_RS18635	BJP74_RS17925	DFS55_RS06190	DBO90_RS17770	EX350_RS04045	FCV17_RS23315	FCV16_RS15850	FCV18_RS07350	JPH1_RS20185
MAV_RS22380	MAH_RS19990	BBJ32_RS07130	KV38_RS21810	BS641_RS23675	BEP52_RS21265	BJP78_RS21660	BJP74_RS20900	DFS55_RS03140	DBO90_RS20575	EX350_RS01130	FCV17_RS01980	FCV16_RS18720	FCV18_RS10225	JPH1_RS23020
MAV_RS02800	MAH_RS02505	BBJ32_RS12355	KV38_RS02580	BS641_RS02525	BEP52_RS02470	BJP78_RS02475	BJP74_RS02455	DFS55_RS22170	DBO90_RS00980	EX350_RS21190	FCV17_RS07435	FCV16_RS24155	FCV18_RS15640	JPH1_RS02485
MAV_RS20370	MAH_RS17960	BBJ32_RS05125	KV38_RS19710	BS641_RS21570	BEP52_RS19030	BJP78_RS19430	BJP74_RS18720	DFS55_RS05230	DBO90_RS18540	EX350_RS03295	FCV17_RS24090	FCV16_RS16625	FCV18_RS08130	JPH1_RS20935
MAV_RS11975	MAH_RS12890	BBJ32_RS20920	KV38_RS11005	BS641_RS11945	BEP52_RS13930	BJP78_RS14185	BJP74_RS12035	DFS55_RS13805	DBO90_RS08690	EX350_RS11650	FCV17_RS16255	FCV16_RS08795	FCV18_RS25135	JPH1_RS12665
MAV_RS11465	MAH_RS13350	BBJ32_RS20465	KV38_RS10475	BS641_RS12460	BEP52_RS14435	BJP78_RS14690	BJP74_RS11530	DFS55_RS14315	DBO90_RS09165	EX350_RS12175	FCV17_RS16785	FCV16_RS09325	FCV18_RS00815	JPH1_RS12140
MAV_RS01610	MAH_RS01475	BBJ32_RS10815	KV38_RS01405	BS641_RS01475	BEP52_RS01405	BJP78_RS01410	BJP74_RS01390	DFS55_RS23355	DBO90_RS04255	EX350_RS22270	FCV17_RS06380	FCV16_RS23100	FCV18_RS14585	JPH1_RS01420
MAV_RS08195	MAH_RS07445	BBJ32_RS00750	KV38_RS07945	BS641_RS15155	BEP52_RS08035	BJP78_RS08020	BJP74_RS07560	DFS55_RS16845	DBO90_RS13115	EX350_RS14695	FCV17_RS19070	FCV16_RS11610	FCV18_RS03100	JPH1_RS09780
MAV_RS11190	MAH_RS13630	BBJ32_RS20185	KV38_RS09985	BS641_RS12880	BEP52_RS14725	BJP78_RS14975	BJP74_RS11245	DFS55_RS14655	DBO90_RS10655	EX350_RS12575	FCV17_RS17050	FCV16_RS09590	FCV18_RS01080	JPH1_RS11880
MAV_RS25465	MAH_RS22695	BBJ32_RS09860	KV38_RS24555	BS641_RS26465	BEP52_RS24030	BJP78_RS24435	BJP74_RS23665	DFS55_RS24560	DBO90_RS23385	EX350_RS23995	FCV17_RS04820	FCV16_RS21535	FCV18_RS13025	JPH1_RS25845
MAV_RS03075	MAH_RS02780	BBJ32_RS12630	KV38_RS02855	BS641_RS02825	BEP52_RS02755	BJP78_RS02760	BJP74_RS02730	DFS55_RS21895	DBO90_RS01255	EX350_RS20915	FCV17_RS07710	FCV16_RS24430	FCV18_RS15915	JPH1_RS02760
MAV_RS15245	MAH_RS10390	BBJ32_RS18090	KV38_RS13910	BS641_RS16265	BEP52_RS11070	BJP78_RS11055	BJP74_RS14870	DFS55_RS10650	DBO90_RS06305	EX350_RS08425	FCV17_RS13300	FCV16_RS05840	FCV18_RS22150	JPH1_RS15815
MAV_RS22140	MAH_RS19745	BBJ32_RS06890	KV38_RS21540	BS641_RS23390	BEP52_RS20995	BJP78_RS21390	BJP74_RS20630	DFS55_RS03405	DBO90_RS20320	EX350_RS01395	FCV17_RS01710	FCV16_RS18450	FCV18_RS09955	JPH1_RS22755
MAV_RS17950	MAH_RS15495	BBJ32_RS15320	KV38_RS16635	BS641_RS19180	BEP52_RS16625	BJP78_RS16880	BJP74_RS16315	DFS55_RS07940	DBO90_RS10410	EX350_RS05695	FCV17_RS21685	FCV16_RS14225	FCV18_RS05720	JPH1_RS18570
MAV_RS05065	MAH_RS04490	BBJ32_RS03745	KV38_RS04695	BS641_RS06265	BEP52_RS05010	BJP78_RS05000	BJP74_RS04540	DFS55_RS20165	DBO90_RS16190	EX350_RS17875	FCV17_RS09945	FCV16_RS02480	FCV18_RS18705	JPH1_RS06300
MAV_RS01020	MAH_RS01105	BBJ32_RS11200	KV38_RS01010	BS641_RS01075	BEP52_RS01005	BJP78_RS01015	BJP74_RS00990	DFS55_RS23835	DBO90_RS03870	EX350_RS22770	FCV17_RS05955	FCV16_RS22675	FCV18_RS14160	JPH1_RS01015
MAV_RS08350	MAH_RS07600	BBJ32_RS00595	KV38_RS08100	BS641_RS15000	BEP52_RS08190	BJP78_RS08175	BJP74_RS07715	DFS55_RS16685	DBO90_RS12960	EX350_RS14540	FCV17_RS18915	FCV16_RS11455	FCV18_RS02945	JPH1_RS09930
MAV_RS09990	MAH_RS08410	BBJ32_RS19180	KV38_RS08935	BS641_RS14155	BEP52_RS09025	BJP78_RS09010	BJP74_RS08560	DFS55_RS15870	DBO90_RS11705	EX350_RS13650	FCV17_RS18105	FCV16_RS10645	FCV18_RS02135	JPH1_RS10795
MAV_RS03700	MAH_RS03345	BBJ32_RS13195	KV38_RS03420	BS641_RS03720	BEP52_RS03320	BJP78_RS03325	BJP74_RS03295	DFS55_RS21325	DBO90_RS17405	EX350_RS20350	FCV17_RS08275	FCV16_RS24995	FCV18_RS16480	JPH1_RS03325
MAV_RS07415	MAH_RS06670	BBJ32_RS01580	KV38_RS07000	BS641_RS15930	BEP52_RS07220	BJP78_RS07220	BJP74_RS06760	DFS55_RS17750	DBO90_RS13950	EX350_RS15480	FCV17_RS19845	FCV16_RS12385	FCV18_RS03880	JPH1_RS09000
MAV_RS16610	MAH_RS09075	BBJ32_RS16750	KV38_RS15305	BS641_RS17825	BEP52_RS09710	BJP78_RS09705	BJP74_RS09260	DFS55_RS09270	DBO90_RS03395	EX350_RS07065	FCV17_RS20320	FCV16_RS12860	FCV18_RS04355	JPH1_RS17210
MAV_RS03110	MAH_RS02815	BBJ32_RS12665	KV38_RS02890	BS641_RS02870	BEP52_RS02790	BJP78_RS02795	BJP74_RS02765	DFS55_RS21860	DBO90_RS01290	EX350_RS20880	FCV17_RS07745	FCV16_RS24465	FCV18_RS15950	JPH1_RS02795
MAV_RS01680	MAH_RS01545	BBJ32_RS10745	KV38_RS01475	BS641_RS01545	BEP52_RS01475	BJP78_RS01480	BJP74_RS01460	DFS55_RS23285	DBO90_RS04325	EX350_RS22200	FCV17_RS06450	FCV16_RS23170	FCV18_RS14655	JPH1_RS01490
MAV_RS15925	MAH_RS09745	BBJ32_RS17440	KV38_RS14630	BS641_RS16960	BEP52_RS10405	BJP78_RS10390	BJP74_RS10115	DFS55_RS09950	DBO90_RS05620	EX350_RS07780	FCV17_RS12625	FCV16_RS05170	FCV18_RS21490	JPH1_RS16450
MAV_RS16015	MAH_RS09665	BBJ32_RS17360	KV38_RS14710	BS641_RS17040	BEP52_RS10325	BJP78_RS10310	BJP74_RS10025	DFS55_RS09870	DBO90_RS05540	EX350_RS07700	FCV17_RS12550	FCV16_RS05090	FCV18_RS21410	JPH1_RS16530
MAV_RS20690	MAH_RS18275	BBJ32_RS05440	KV38_RS20035	BS641_RS21895	BEP52_RS19510	BJP78_RS19755	BJP74_RS19145	DFS55_RS04910	DBO90_RS18860	EX350_RS02955	FCV17_RS24410	FCV16_RS16945	FCV18_RS08450	JPH1_RS21265
MAV_RS17420	MAH_RS14940	BBJ32_RS15840	KV38_RS16090	BS641_RS18645	BEP52_RS16040	BJP78_RS16290	BJP74_RS15730	DFS55_RS08485	DBO90_RS09855	EX350_RS06240	FCV17_RS21135	FCV16_RS13675	FCV18_RS05170	JPH1_RS18025
MAV_RS22485	MAH_RS20095	BBJ32_RS07235	KV38_RS21925	BS641_RS23790	BEP52_RS21380	BJP78_RS21780	BJP74_RS21015	DFS55_RS03025	DBO90_RS20690	EX350_RS01015	FCV17_RS02095	FCV16_RS18835	FCV18_RS10340	JPH1_RS23135
MAV_RS18590	MAH_RS16195	BBJ32_RS14770	KV38_RS17350	BS641_RS19745	BEP52_RS17185	BJP78_RS17580	BJP74_RS16875	DFS55_RS07230	DBO90_RS02570	EX350_RS05100	FCV17_RS22245	FCV16_RS14780	FCV18_RS06280	JPH1_RS19130
MAV_RS20615	MAH_RS18200	BBJ32_RS05365	KV38_RS19955	BS641_RS21820	BEP52_RS19435	BJP78_RS19680	BJP74_RS19070	DFS55_RS04985	DBO90_RS18785	EX350_RS03030	FCV17_RS24335	FCV16_RS16870	FCV18_RS08375	JPH1_RS21190
MAV_RS21480	MAH_RS19065	BBJ32_RS06230	KV38_RS20835	BS641_RS22710	BEP52_RS20305	BJP78_RS20705	BJP74_RS19945	DFS55_RS04110	DBO90_RS19660	EX350_RS02115	FCV17_RS01030	FCV16_RS17770	FCV18_RS09275	JPH1_RS22095
MAV_RS08140	MAH_RS07390	BBJ32_RS00805	KV38_RS07885	BS641_RS15215	BEP52_RS07980	BJP78_RS07965	BJP74_RS07505	DFS55_RS16905	DBO90_RS13170	EX350_RS14755	FCV17_RS19130	FCV16_RS11670	FCV18_RS03160	JPH1_RS09720
MAV_RS03225	MAH_RS02930	BBJ32_RS12780	KV38_RS03010	BS641_RS03295	BEP52_RS02910	BJP78_RS02915	BJP74_RS02885	DFS55_RS21740	DBO90_RS01410	EX350_RS20760	FCV17_RS07870	FCV16_RS24590	FCV18_RS16075	JPH1_RS02915
MAV_RS03395	MAH_RS03035	BBJ32_RS12885	KV38_RS03115	BS641_RS03420	BEP52_RS03015	BJP78_RS03020	BJP74_RS02990	DFS55_RS21635	DBO90_RS01515	EX350_RS20655	FCV17_RS07975	FCV16_RS24695	FCV18_RS16180	JPH1_RS03020
MAV_RS00910	MAH_RS00995	BBJ32_RS11310	KV38_RS00895	BS641_RS00960	BEP52_RS00895	BJP78_RS00905	BJP74_RS00880	DFS55_RS23945	DBO90_RS03755	EX350_RS22880	FCV17_RS05845	FCV16_RS22565	FCV18_RS14050	JPH1_RS00905
MAV_RS13940	MAH_RS11650	BBJ32_RS22080	KV38_RS12140	BS641_RS10290	BEP52_RS12715	BJP78_RS12700	BJP74_RS13230	DFS55_RS12520	DBO90_RS07495	EX350_RS10305	FCV17_RS15005	FCV16_RS07545	FCV18_RS23880	JPH1_RS13900
MAV_RS23850	MAH_RS21455	BBJ32_RS08605	KV38_RS23310	BS641_RS25220	BEP52_RS22775	BJP78_RS23180	BJP74_RS22410	DFS55_RS01610	DBO90_RS22080	EX350_RS25235	FCV17_RS03555	FCV16_RS20295	FCV18_RS11785	JPH1_RS24610
MAV_RS11145	MAH_RS13675	BBJ32_RS20140	KV38_RS09935	BS641_RS12925	BEP52_RS14775	BJP78_RS15025	BJP74_RS11195	DFS55_RS14705	DBO90_RS10705	EX350_RS12625	FCV17_RS17100	FCV16_RS09640	FCV18_RS01130	JPH1_RS11830
MAV_RS18640	MAH_RS16245	BBJ32_RS14720	KV38_RS17400	BS641_RS19805	BEP52_RS17235	BJP78_RS17630	BJP74_RS16925	DFS55_RS07180	DBO90_RS02520	EX350_RS05050	FCV17_RS22295	FCV16_RS14830	FCV18_RS06330	JPH1_RS19180
MAV_RS06285	MAH_RS05760	BBJ32_RS02490	KV38_RS06015	BS641_RS07555	BEP52_RS06305	BJP78_RS06300	BJP74_RS05845	DFS55_RS18850	DBO90_RS14895	EX350_RS16555	FCV17_RS11225	FCV16_RS03765	FCV18_RS20075	JPH1_RS07635
MAV_RS23535	MAH_RS21140	BBJ32_RS08285	KV38_RS22985	BS641_RS24895	BEP52_RS22450	BJP78_RS22855	BJP74_RS22085	DFS55_RS01935	DBO90_RS21755	EX350_RS25560	FCV17_RS03230	FCV16_RS19970	FCV18_RS11460	JPH1_RS24285
MAV_RS03150	MAH_RS02855	BBJ32_RS12705	KV38_RS02930	BS641_RS03220	BEP52_RS02830	BJP78_RS02835	BJP74_RS02805	DFS55_RS21820	DBO90_RS01330	EX350_RS20840	FCV17_RS07790	FCV16_RS24510	FCV18_RS15995	JPH1_RS02835
MAV_RS03290	MAH_RS02995	BBJ32_RS12845	KV38_RS03075	BS641_RS03360	BEP52_RS02975	BJP78_RS02980	BJP74_RS02950	DFS55_RS21675	DBO90_RS01475	EX350_RS20695	FCV17_RS07935	FCV16_RS24655	FCV18_RS16140	JPH1_RS02980
MAV_RS08485	MAH_RS07735	BBJ32_RS00460	KV38_RS08235	BS641_RS14865	BEP52_RS08325	BJP78_RS08310	BJP74_RS07850	DFS55_RS16550	DBO90_RS12825	EX350_RS14405	FCV17_RS18780	FCV16_RS11320	FCV18_RS02810	JPH1_RS10065
MAV_RS20275	MAH_RS17865	BBJ32_RS05025	KV38_RS19615	BS641_RS21475	BEP52_RS18935	BJP78_RS19335	BJP74_RS18625	DFS55_RS05325	DBO90_RS18440	EX350_RS03390	FCV17_RS23995	FCV16_RS16535	FCV18_RS08035	JPH1_RS20840
MAV_RS08395	MAH_RS07645	BBJ32_RS00550	KV38_RS08145	BS641_RS14955	BEP52_RS08235	BJP78_RS08220	BJP74_RS07760	DFS55_RS16640	DBO90_RS12915	EX350_RS14495	FCV17_RS18870	FCV16_RS11410	FCV18_RS02900	JPH1_RS09975
MAV_RS22960	MAH_RS20570	BBJ32_RS07710	KV38_RS22405	BS641_RS24275	BEP52_RS21860	BJP78_RS22260	BJP74_RS21495	DFS55_RS02520	DBO90_RS21170	EX350_RS00525	FCV17_RS02600	FCV16_RS19340	FCV18_RS10840	JPH1_RS23640
MAV_RS23805	MAH_RS21410	BBJ32_RS08560	KV38_RS23265	BS641_RS25175	BEP52_RS22730	BJP78_RS23135	BJP74_RS22365	DFS55_RS01655	DBO90_RS22035	EX350_RS25280	FCV17_RS03510	FCV16_RS20250	FCV18_RS11740	JPH1_RS24565
MAV_RS15315	MAH_RS10330	BBJ32_RS18020	KV38_RS13980	BS641_RS16335	BEP52_RS11000	BJP78_RS10985	BJP74_RS14940	DFS55_RS10580	DBO90_RS06235	EX350_RS08350	FCV17_RS13230	FCV16_RS05770	FCV18_RS22080	JPH1_RS15885
MAV_RS22800	MAH_RS20410	BBJ32_RS07550	KV38_RS22240	BS641_RS24110	BEP52_RS21695	BJP78_RS22095	BJP74_RS21330	DFS55_RS02685	DBO90_RS21005	EX350_RS00695	FCV17_RS02435	FCV16_RS19175	FCV18_RS10675	JPH1_RS23475
MAV_RS11790	MAH_RS13060	BBJ32_RS20750	KV38_RS10835	BS641_RS12115	BEP52_RS14100	BJP78_RS14355	BJP74_RS11865	DFS55_RS13975	DBO90_RS08860	EX350_RS11820	FCV17_RS16425	FCV16_RS08965	FCV18_RS25305	JPH1_RS12495
MAV_RS10955	MAH_RS13875	BBJ32_RS19950	KV38_RS09730	BS641_RS13150	BEP52_RS14980	BJP78_RS15230	BJP74_RS10990	DFS55_RS14905	DBO90_RS10905	EX350_RS12825	FCV17_RS17300	FCV16_RS09840	FCV18_RS01330	JPH1_RS11630
MAV_RS00990	MAH_RS01075	BBJ32_RS11230	KV38_RS00975	BS641_RS01040	BEP52_RS00975	BJP78_RS00985	BJP74_RS00960	DFS55_RS23865	DBO90_RS03835	EX350_RS22800	FCV17_RS05925	FCV16_RS22645	FCV18_RS14130	JPH1_RS00985
MAV_RS03425	MAH_RS03065	BBJ32_RS12915	KV38_RS03150	BS641_RS03450	BEP52_RS03045	BJP78_RS03050	BJP74_RS03020	DFS55_RS21600	DBO90_RS01545	EX350_RS20625	FCV17_RS08005	FCV16_RS24725	FCV18_RS16210	JPH1_RS03050
MAV_RS02185	MAH_RS02060	BBJ32_RS10235	KV38_RS02125	BS641_RS02070	BEP52_RS02015	BJP78_RS02020	BJP74_RS02000	DFS55_RS22625	DBO90_RS04845	EX350_RS21645	FCV17_RS06980	FCV16_RS23700	FCV18_RS15185	JPH1_RS02030
MAV_RS22545	MAH_RS20155	BBJ32_RS07295	KV38_RS21985	BS641_RS23855	BEP52_RS21440	BJP78_RS21840	BJP74_RS21075	DFS55_RS02960	DBO90_RS20750	EX350_RS00950	FCV17_RS02155	FCV16_RS18895	FCV18_RS10400	JPH1_RS23195
MAV_RS18570	MAH_RS16175	BBJ32_RS14790	KV38_RS17330	BS641_RS19725	BEP52_RS17165	BJP78_RS17560	BJP74_RS16855	DFS55_RS07250	DBO90_RS02590	EX350_RS05120	FCV17_RS22225	FCV16_RS14760	FCV18_RS06260	JPH1_RS19110
MAV_RS11840	MAH_RS13010	BBJ32_RS20800	KV38_RS10885	BS641_RS12065	BEP52_RS14050	BJP78_RS14305	BJP74_RS11915	DFS55_RS13925	DBO90_RS08810	EX350_RS11770	FCV17_RS16375	FCV16_RS08915	FCV18_RS25255	JPH1_RS12545
MAV_RS12985	MAH_RS12590	BBJ32_RS21105	KV38_RS11205	BS641_RS11270	BEP52_RS13665	BJP78_RS13650	BJP74_RS12275	DFS55_RS13455	DBO90_RS08490	EX350_RS11275	FCV17_RS15985	FCV16_RS08525	FCV18_RS24865	JPH1_RS12910
MAV_RS07555	MAH_RS06825	BBJ32_RS01500	KV38_RS07180	BS641_RS15790	BEP52_RS07395	BJP78_RS07380	BJP74_RS06920	DFS55_RS17580	DBO90_RS13790	EX350_RS15335	FCV17_RS19705	FCV16_RS12245	FCV18_RS03735	JPH1_RS09145
MAV_RS15960	MAH_RS09710	BBJ32_RS17405	KV38_RS14665	BS641_RS16995	BEP52_RS10370	BJP78_RS10355	BJP74_RS10080	DFS55_RS09915	DBO90_RS05585	EX350_RS07745	FCV17_RS12590	FCV16_RS05135	FCV18_RS21455	JPH1_RS16485
MAV_RS11765	MAH_RS13085	BBJ32_RS20725	KV38_RS10810	BS641_RS12140	BEP52_RS14125	BJP78_RS14380	BJP74_RS11840	DFS55_RS14000	DBO90_RS08885	EX350_RS11845	FCV17_RS16450	FCV16_RS08990	FCV18_RS25330	JPH1_RS12470
MAV_RS15270	MAH_RS10365	BBJ32_RS18065	KV38_RS13935	BS641_RS16290	BEP52_RS11045	BJP78_RS11030	BJP74_RS14895	DFS55_RS10625	DBO90_RS06280	EX350_RS08395	FCV17_RS13275	FCV16_RS05815	FCV18_RS22125	JPH1_RS15840
MAV_RS16630	MAH_RS09055	BBJ32_RS16730	KV38_RS15325	BS641_RS17845	BEP52_RS09685	BJP78_RS09680	BJP74_RS09235	DFS55_RS09250	DBO90_RS03375	EX350_RS07045	FCV17_RS20340	FCV16_RS12880	FCV18_RS04375	JPH1_RS17230
MAV_RS04960	MAH_RS04380	BBJ32_RS14170	KV38_RS04580	BS641_RS06155	BEP52_RS04450	BJP78_RS04455	BJP74_RS04420	DFS55_RS20275	DBO90_RS16310	EX350_RS17990	FCV17_RS09830	FCV16_RS02365	FCV18_RS18590	JPH1_RS06185
MAV_RS19915	MAH_RS17505	BBJ32_RS04655	KV38_RS19240	BS641_RS21105	BEP52_RS18560	BJP78_RS18960	BJP74_RS18250	DFS55_RS05700	DBO90_RS18055	EX350_RS03765	FCV17_RS23580	FCV16_RS16125	FCV18_RS07625	JPH1_RS20465
MAV_RS18470	MAH_RS16075	BBJ32_RS14890	KV38_RS17230	BS641_RS19625	BEP52_RS17065	BJP78_RS17460	BJP74_RS16755	DFS55_RS07350	DBO90_RS02690	EX350_RS05220	FCV17_RS22125	FCV16_RS14660	FCV18_RS06160	JPH1_RS19010
MAV_RS20545	MAH_RS18135	BBJ32_RS05300	KV38_RS19890	BS641_RS21750	BEP52_RS19215	BJP78_RS19615	BJP74_RS18905	DFS55_RS05050	DBO90_RS18720	EX350_RS03115	FCV17_RS24270	FCV16_RS16805	FCV18_RS08310	JPH1_RS21115
MAV_RS16665	MAH_RS09020	BBJ32_RS16695	KV38_RS15360	BS641_RS17880	BEP52_RS09650	BJP78_RS09645	BJP74_RS09200	DFS55_RS09215	DBO90_RS03340	EX350_RS07010	FCV17_RS20375	FCV16_RS12915	FCV18_RS04410	JPH1_RS17265
MAV_RS07940	MAH_RS07215	BBJ32_RS00980	KV38_RS07705	BS641_RS15395	BEP52_RS07800	BJP78_RS07785	BJP74_RS07325	DFS55_RS17085	DBO90_RS13345	EX350_RS14940	FCV17_RS19310	FCV16_RS11850	FCV18_RS03340	JPH1_RS09540
MAV_RS16670	MAH_RS09015	BBJ32_RS16690	KV38_RS15365	BS641_RS17885	BEP52_RS09645	BJP78_RS09640	BJP74_RS09195	DFS55_RS09210	DBO90_RS03335	EX350_RS07005	FCV17_RS20380	FCV16_RS12920	FCV18_RS04415	JPH1_RS17270
MAV_RS13505	MAH_RS12085	BBJ32_RS21650	KV38_RS11695	BS641_RS10720	BEP52_RS13145	BJP78_RS13130	BJP74_RS12800	DFS55_RS12965	DBO90_RS07925	EX350_RS10735	FCV17_RS15460	FCV16_RS08000	FCV18_RS24340	JPH1_RS13450
MAV_RS05210	MAH_RS04630	BBJ32_RS03600	KV38_RS04835	BS641_RS06405	BEP52_RS05150	BJP78_RS05140	BJP74_RS04685	DFS55_RS20025	DBO90_RS16045	EX350_RS17735	FCV17_RS10090	FCV16_RS02625	FCV18_RS18845	JPH1_RS06440
MAV_RS01630	MAH_RS01495	BBJ32_RS10795	KV38_RS01425	BS641_RS01495	BEP52_RS01425	BJP78_RS01430	BJP74_RS01410	DFS55_RS23335	DBO90_RS04275	EX350_RS22250	FCV17_RS06400	FCV16_RS23120	FCV18_RS14605	JPH1_RS01440
MAV_RS03505	MAH_RS03145	BBJ32_RS13000	KV38_RS03230	BS641_RS03530	BEP52_RS03125	BJP78_RS03130	BJP74_RS03100	DFS55_RS21520	DBO90_RS17605	EX350_RS20545	FCV17_RS08085	FCV16_RS24805	FCV18_RS16290	JPH1_RS03130
MAV_RS11380	MAH_RS13435	BBJ32_RS20380	KV38_RS10390	BS641_RS12545	BEP52_RS14520	BJP78_RS14775	BJP74_RS11445	DFS55_RS14400	DBO90_RS09250	EX350_RS12260	FCV17_RS16870	FCV16_RS09410	FCV18_RS00900	JPH1_RS12055
MAV_RS11445	MAH_RS13370	BBJ32_RS20445	KV38_RS10455	BS641_RS12480	BEP52_RS14455	BJP78_RS14710	BJP74_RS11510	DFS55_RS14335	DBO90_RS09185	EX350_RS12195	FCV17_RS16805	FCV16_RS09345	FCV18_RS00835	JPH1_RS12120
MAV_RS06315	MAH_RS05790	BBJ32_RS02460	KV38_RS06045	BS641_RS07585	BEP52_RS06335	BJP78_RS06330	BJP74_RS05875	DFS55_RS18820	DBO90_RS14865	EX350_RS16525	FCV17_RS11255	FCV16_RS03795	FCV18_RS20105	JPH1_RS07665
MAV_RS08385	MAH_RS07635	BBJ32_RS00560	KV38_RS08135	BS641_RS14965	BEP52_RS08225	BJP78_RS08210	BJP74_RS07750	DFS55_RS16650	DBO90_RS12925	EX350_RS14505	FCV17_RS18880	FCV16_RS11420	FCV18_RS02910	JPH1_RS09965
MAV_RS23970	MAH_RS21575	BBJ32_RS08725	KV38_RS23430	BS641_RS25340	BEP52_RS22865	BJP78_RS23270	BJP74_RS22500	DFS55_RS01490	DBO90_RS22200	EX350_RS25115	FCV17_RS03675	FCV16_RS20415	FCV18_RS11905	JPH1_RS24730
MAV_RS07535	MAH_RS06790	BBJ32_RS01465	KV38_RS07160	BS641_RS15810	BEP52_RS07375	BJP78_RS07345	BJP74_RS06885	DFS55_RS17600	DBO90_RS13825	EX350_RS15355	FCV17_RS19725	FCV16_RS12265	FCV18_RS03755	JPH1_RS09125
MAV_RS23950	MAH_RS21555	BBJ32_RS08705	KV38_RS23410	BS641_RS25320	BEP52_RS22845	BJP78_RS23250	BJP74_RS22480	DFS55_RS01510	DBO90_RS22180	EX350_RS25135	FCV17_RS03655	FCV16_RS20395	FCV18_RS11885	JPH1_RS24710
MAV_RS24995	MAH_RS22225	BBJ32_RS09385	KV38_RS24065	BS641_RS25970	BEP52_RS23540	BJP78_RS23945	BJP74_RS23175	DFS55_RS00855	DBO90_RS22885	EX350_RS24485	FCV17_RS04300	FCV16_RS21040	FCV18_RS12530	JPH1_RS25360
MAV_RS11025	MAH_RS13795	BBJ32_RS20020	KV38_RS09815	BS641_RS13070	BEP52_RS14900	BJP78_RS15150	BJP74_RS11070	DFS55_RS14825	DBO90_RS10825	EX350_RS12745	FCV17_RS17220	FCV16_RS09760	FCV18_RS01250	JPH1_RS11710
MAV_RS17030	MAH_RS14565	BBJ32_RS16210	KV38_RS15715	BS641_RS18275	BEP52_RS15665	BJP78_RS15915	BJP74_RS15355	DFS55_RS08860	DBO90_RS09480	EX350_RS06620	FCV17_RS20765	FCV16_RS13305	FCV18_RS04800	JPH1_RS17650
MAV_RS03550	MAH_RS03190	BBJ32_RS13045	KV38_RS03275	BS641_RS03575	BEP52_RS03170	BJP78_RS03175	BJP74_RS03145	DFS55_RS21475	DBO90_RS17560	EX350_RS20500	FCV17_RS08130	FCV16_RS24850	FCV18_RS16335	JPH1_RS03175
MAV_RS11805	MAH_RS13045	BBJ32_RS20765	KV38_RS10850	BS641_RS12100	BEP52_RS14085	BJP78_RS14340	BJP74_RS11880	DFS55_RS13960	DBO90_RS08845	EX350_RS11805	FCV17_RS16410	FCV16_RS08950	FCV18_RS25290	JPH1_RS12510
MAV_RS16965	MAH_RS14500	BBJ32_RS16275	KV38_RS15650	BS641_RS18210	BEP52_RS15600	BJP78_RS15850	BJP74_RS15290	DFS55_RS08925	DBO90_RS09415	EX350_RS06685	FCV17_RS20700	FCV16_RS13240	FCV18_RS04735	JPH1_RS17585
MAV_RS20225	MAH_RS17815	BBJ32_RS04975	KV38_RS19560	BS641_RS21420	BEP52_RS18880	BJP78_RS19280	BJP74_RS18570	DFS55_RS05380	DBO90_RS18385	EX350_RS03445	FCV17_RS23940	FCV16_RS16480	FCV18_RS07980	JPH1_RS20785
MAV_RS14645	MAH_RS10970	BBJ32_RS22650	KV38_RS13320	BS641_RS08935	BEP52_RS11665	BJP78_RS11650	BJP74_RS14280	DFS55_RS11270	DBO90_RS06920	EX350_RS09050	FCV17_RS13920	FCV16_RS06460	FCV18_RS22770	JPH1_RS15190
MAV_RS22220	MAH_RS19825	BBJ32_RS06970	KV38_RS21625	BS641_RS23470	BEP52_RS21080	BJP78_RS21475	BJP74_RS20715	DFS55_RS03320	DBO90_RS20405	EX350_RS01310	FCV17_RS01795	FCV16_RS18535	FCV18_RS10040	JPH1_RS22840
MAV_RS14850	MAH_RS10795	BBJ32_RS00060	KV38_RS13495	BS641_RS08760	BEP52_RS11490	BJP78_RS11475	BJP74_RS14450	DFS55_RS11065	DBO90_RS06735	EX350_RS08845	FCV17_RS13715	FCV16_RS06255	FCV18_RS22565	JPH1_RS15395
MAV_RS07530	MAH_RS06785	BBJ32_RS01455	KV38_RS07155	BS641_RS15815	BEP52_RS07370	BJP78_RS07340	BJP74_RS06880	DFS55_RS17605	DBO90_RS13835	EX350_RS15360	FCV17_RS19730	FCV16_RS12270	FCV18_RS03760	JPH1_RS09120
MAV_RS14400	MAH_RS11210	BBJ32_RS22405	KV38_RS12610	BS641_RS09820	BEP52_RS12275	BJP78_RS12260	BJP74_RS13670	DFS55_RS12045	DBO90_RS07170	EX350_RS09875	FCV17_RS14520	FCV16_RS07060	FCV18_RS23660	JPH1_RS14360
MAV_RS23620	MAH_RS21225	BBJ32_RS08370	KV38_RS23075	BS641_RS24985	BEP52_RS22540	BJP78_RS22945	BJP74_RS22175	DFS55_RS01845	DBO90_RS21845	EX350_RS25470	FCV17_RS03320	FCV16_RS20060	FCV18_RS11550	JPH1_RS24375
MAV_RS17975	MAH_RS15520	BBJ32_RS15295	KV38_RS16660	BS641_RS19205	BEP52_RS16650	BJP78_RS16905	BJP74_RS16340	DFS55_RS07915	DBO90_RS03100	EX350_RS05670	FCV17_RS21710	FCV16_RS14250	FCV18_RS05745	JPH1_RS18595
MAV_RS03570	MAH_RS03215	BBJ32_RS13070	KV38_RS03295	BS641_RS03595	BEP52_RS03195	BJP78_RS03200	BJP74_RS03170	DFS55_RS21455	DBO90_RS17535	EX350_RS20480	FCV17_RS08150	FCV16_RS24870	FCV18_RS16355	JPH1_RS03195
MAV_RS17310	MAH_RS14835	BBJ32_RS15945	KV38_RS15980	BS641_RS18535	BEP52_RS15930	BJP78_RS16180	BJP74_RS15620	DFS55_RS08595	DBO90_RS09745	EX350_RS06350	FCV17_RS21025	FCV16_RS13565	FCV18_RS05060	JPH1_RS17915
MAV_RS23135	MAH_RS20745	BBJ32_RS07885	KV38_RS22580	BS641_RS24455	BEP52_RS22035	BJP78_RS22435	BJP74_RS21670	DFS55_RS02345	DBO90_RS21345	EX350_RS00330	FCV17_RS02775	FCV16_RS19515	FCV18_RS11015	JPH1_RS23835
MAV_RS13745	MAH_RS11845	BBJ32_RS21890	KV38_RS11940	BS641_RS10480	BEP52_RS12905	BJP78_RS12890	BJP74_RS13040	DFS55_RS12725	DBO90_RS07685	EX350_RS10500	FCV17_RS15220	FCV16_RS07760	FCV18_RS24095	JPH1_RS13690
MAV_RS25395	MAH_RS22625	BBJ32_RS09790	KV38_RS24480	BS641_RS26390	BEP52_RS23950	BJP78_RS24355	BJP74_RS23585	DFS55_RS00440	DBO90_RS23310	EX350_RS24070	FCV17_RS04745	FCV16_RS21460	FCV18_RS12950	JPH1_RS25770
MAV_RS03220	MAH_RS02925	BBJ32_RS12775	KV38_RS03000	BS641_RS03290	BEP52_RS02900	BJP78_RS02905	BJP74_RS02875	DFS55_RS21750	DBO90_RS01400	EX350_RS20770	FCV17_RS07860	FCV16_RS24580	FCV18_RS16065	JPH1_RS02905
MAV_RS21830	MAH_RS19415	BBJ32_RS06580	KV38_RS21205	BS641_RS23060	BEP52_RS20655	BJP78_RS21055	BJP74_RS20295	DFS55_RS03740	DBO90_RS20010	EX350_RS01745	FCV17_RS01400	FCV16_RS18140	FCV18_RS09645	JPH1_RS22445
MAV_RS02645	MAH_RS02350	BBJ32_RS12200	KV38_RS02425	BS641_RS02370	BEP52_RS02315	BJP78_RS02320	BJP74_RS02300	DFS55_RS22325	DBO90_RS00825	EX350_RS21345	FCV17_RS07280	FCV16_RS24000	FCV18_RS15485	JPH1_RS02330
MAV_RS06625	MAH_RS06110	BBJ32_RS02140	KV38_RS06365	BS641_RS07905	BEP52_RS06655	BJP78_RS06650	BJP74_RS06195	DFS55_RS18495	DBO90_RS14540	EX350_RS16200	FCV17_RS11575	FCV16_RS04115	FCV18_RS20435	JPH1_RS07985
MAV_RS22910	MAH_RS20520	BBJ32_RS07660	KV38_RS22350	BS641_RS24220	BEP52_RS21805	BJP78_RS22205	BJP74_RS21440	DFS55_RS02575	DBO90_RS21115	EX350_RS00580	FCV17_RS02545	FCV16_RS19285	FCV18_RS10785	JPH1_RS23585
MAV_RS23340	MAH_RS20945	BBJ32_RS08090	KV38_RS22790	BS641_RS24700	BEP52_RS22250	BJP78_RS22650	BJP74_RS21890	DFS55_RS02135	DBO90_RS21555	EX350_RS00075	FCV17_RS03030	FCV16_RS19770	FCV18_RS11260	JPH1_RS24085
MAV_RS03580	MAH_RS03225	BBJ32_RS13080	KV38_RS03305	BS641_RS03605	BEP52_RS03205	BJP78_RS03210	BJP74_RS03180	DFS55_RS21445	DBO90_RS17525	EX350_RS20470	FCV17_RS08160	FCV16_RS24880	FCV18_RS16365	JPH1_RS03205
MAV_RS02090	MAH_RS01965	BBJ32_RS10330	KV38_RS02025	BS641_RS01970	BEP52_RS01915	BJP78_RS01920	BJP74_RS01900	DFS55_RS22735	DBO90_RS04745	EX350_RS21755	FCV17_RS06880	FCV16_RS23600	FCV18_RS15085	JPH1_RS01920
MAV_RS08360	MAH_RS07610	BBJ32_RS00585	KV38_RS08110	BS641_RS14990	BEP52_RS08200	BJP78_RS08185	BJP74_RS07725	DFS55_RS16675	DBO90_RS12950	EX350_RS14530	FCV17_RS18905	FCV16_RS11445	FCV18_RS02935	JPH1_RS09940
MAV_RS21490	MAH_RS19075	BBJ32_RS06240	KV38_RS20845	BS641_RS22720	BEP52_RS20315	BJP78_RS20715	BJP74_RS19955	DFS55_RS04100	DBO90_RS19670	EX350_RS02105	FCV17_RS01040	FCV16_RS17780	FCV18_RS09285	JPH1_RS22105
MAV_RS16320	MAH_RS09370	BBJ32_RS17065	KV38_RS15010	BS641_RS17355	BEP52_RS10025	BJP78_RS10010	BJP74_RS09725	DFS55_RS09560	DBO90_RS05240	EX350_RS07405	FCV17_RS12255	FCV16_RS04795	FCV18_RS21115	JPH1_RS16840
MAV_RS19280	MAH_RS16880	BBJ32_RS04015	KV38_RS18500	BS641_RS20480	BEP52_RS17885	BJP78_RS18285	BJP74_RS17575	DFS55_RS06535	DBO90_RS01815	EX350_RS04390	FCV17_RS22960	FCV16_RS15495	FCV18_RS06995	JPH1_RS19840
MAV_RS24925	MAH_RS22155	BBJ32_RS09310	KV38_RS23985	BS641_RS25895	BEP52_RS23460	BJP78_RS23865	BJP74_RS23095	DFS55_RS00935	DBO90_RS22695	EX350_RS24565	FCV17_RS04225	FCV16_RS20965	FCV18_RS12455	JPH1_RS25285
MAV_RS18465	MAH_RS16070	BBJ32_RS14895	KV38_RS17225	BS641_RS19620	BEP52_RS17060	BJP78_RS17455	BJP74_RS16750	DFS55_RS07355	DBO90_RS02695	EX350_RS05225	FCV17_RS22120	FCV16_RS14655	FCV18_RS06155	JPH1_RS19005
MAV_RS21685	MAH_RS19270	BBJ32_RS06435	KV38_RS21060	BS641_RS22915	BEP52_RS20510	BJP78_RS20910	BJP74_RS20150	DFS55_RS03885	DBO90_RS19865	EX350_RS01890	FCV17_RS01255	FCV16_RS17995	FCV18_RS09500	JPH1_RS22300
MAV_RS01045	MAH_RS01130	BBJ32_RS11175	KV38_RS01035	BS641_RS01100	BEP52_RS01030	BJP78_RS01040	BJP74_RS01015	DFS55_RS23810	DBO90_RS03895	EX350_RS22745	FCV17_RS05980	FCV16_RS22700	FCV18_RS14185	JPH1_RS01040
MAV_RS17820	MAH_RS15365	BBJ32_RS15450	KV38_RS16490	BS641_RS19040	BEP52_RS16480	BJP78_RS16735	BJP74_RS16170	DFS55_RS08085	DBO90_RS10260	EX350_RS05840	FCV17_RS21540	FCV16_RS14080	FCV18_RS05575	JPH1_RS18430
MAV_RS03600	MAH_RS03250	BBJ32_RS13105	KV38_RS03330	BS641_RS03630	BEP52_RS03230	BJP78_RS03235	BJP74_RS03205	DFS55_RS21420	DBO90_RS17500	EX350_RS20445	FCV17_RS08185	FCV16_RS24905	FCV18_RS16390	JPH1_RS03230
MAV_RS19685	MAH_RS17295	BBJ32_RS04420	KV38_RS18910	BS641_RS20885	BEP52_RS18300	BJP78_RS18700	BJP74_RS17990	DFS55_RS06125	DBO90_RS17830	EX350_RS03980	FCV17_RS23375	FCV16_RS15910	FCV18_RS07410	JPH1_RS20250
MAV_RS10195	MAH_RS08625	BBJ32_RS19380	KV38_RS09145	BS641_RS13790	BEP52_RS09260	BJP78_RS09255	BJP74_RS08800	DFS55_RS15505	DBO90_RS11485	EX350_RS13430	FCV17_RS17895	FCV16_RS10435	FCV18_RS01925	JPH1_RS11015
MAV_RS16340	MAH_RS09350	BBJ32_RS17045	KV38_RS15030	BS641_RS17375	BEP52_RS10005	BJP78_RS09990	BJP74_RS09705	DFS55_RS09540	DBO90_RS05220	EX350_RS07385	FCV17_RS12235	FCV16_RS04775	FCV18_RS21095	JPH1_RS16860
MAV_RS01080	MAH_RS01165	BBJ32_RS11140	KV38_RS01070	BS641_RS01150	BEP52_RS01065	BJP78_RS01075	BJP74_RS01050	DFS55_RS23775	DBO90_RS03930	EX350_RS22710	FCV17_RS06015	FCV16_RS22735	FCV18_RS14220	JPH1_RS01075
MAV_RS05900	MAH_RS05405	BBJ32_RS02850	KV38_RS05630	BS641_RS07190	BEP52_RS05925	BJP78_RS05920	BJP74_RS05465	DFS55_RS19225	DBO90_RS15280	EX350_RS16940	FCV17_RS10795	FCV16_RS03335	FCV18_RS19645	JPH1_RS07245
MAV_RS05170	MAH_RS04590	BBJ32_RS03640	KV38_RS04795	BS641_RS06365	BEP52_RS05110	BJP78_RS05100	BJP74_RS04645	DFS55_RS20065	DBO90_RS16085	EX350_RS17775	FCV17_RS10050	FCV16_RS02585	FCV18_RS18805	JPH1_RS06400
MAV_RS10540	MAH_RS14110	BBJ32_RS19710	KV38_RS09485	BS641_RS13390	BEP52_RS15220	BJP78_RS15470	BJP74_RS10750	DFS55_RS15145	DBO90_RS11145	EX350_RS13070	FCV17_RS17545	FCV16_RS10085	FCV18_RS01575	JPH1_RS11385
MAV_RS11810	MAH_RS13040	BBJ32_RS20770	KV38_RS10855	BS641_RS12095	BEP52_RS14080	BJP78_RS14335	BJP74_RS11885	DFS55_RS13955	DBO90_RS08840	EX350_RS11800	FCV17_RS16405	FCV16_RS08945	FCV18_RS25285	JPH1_RS12515
MAV_RS16330	MAH_RS09360	BBJ32_RS17055	KV38_RS15020	BS641_RS17365	BEP52_RS10015	BJP78_RS10000	BJP74_RS09715	DFS55_RS09550	DBO90_RS05230	EX350_RS07395	FCV17_RS12245	FCV16_RS04785	FCV18_RS21105	JPH1_RS16850
MAV_RS19090	MAH_RS16695	BBJ32_RS14275	KV38_RS18305	BS641_RS20265	BEP52_RS17690	BJP78_RS18090	BJP74_RS17380	DFS55_RS06725	DBO90_RS02070	EX350_RS04585	FCV17_RS22765	FCV16_RS15300	FCV18_RS06800	JPH1_RS19645
MAV_RS03620	MAH_RS03270	BBJ32_RS13125	KV38_RS03350	BS641_RS03650	BEP52_RS03250	BJP78_RS03255	BJP74_RS03225	DFS55_RS21400	DBO90_RS17480	EX350_RS20425	FCV17_RS08205	FCV16_RS24925	FCV18_RS16410	JPH1_RS03250
MAV_RS08120	MAH_RS07370	BBJ32_RS00825	KV38_RS07865	BS641_RS15235	BEP52_RS07960	BJP78_RS07945	BJP74_RS07485	DFS55_RS16925	DBO90_RS13190	EX350_RS14775	FCV17_RS19150	FCV16_RS11690	FCV18_RS03180	JPH1_RS09700
MAV_RS10170	MAH_RS08600	BBJ32_RS19355	KV38_RS09120	BS641_RS13815	BEP52_RS09235	BJP78_RS09230	BJP74_RS08775	DFS55_RS15530	DBO90_RS11510	EX350_RS13455	FCV17_RS17920	FCV16_RS10460	FCV18_RS01950	JPH1_RS10990
MAV_RS18395	MAH_RS16000	BBJ32_RS14965	KV38_RS17155	BS641_RS19550	BEP52_RS16985	BJP78_RS17385	BJP74_RS16675	DFS55_RS07425	DBO90_RS02765	EX350_RS05310	FCV17_RS22050	FCV16_RS14585	FCV18_RS06085	JPH1_RS18935
MAV_RS16585	MAH_RS09100	BBJ32_RS16775	KV38_RS15280	BS641_RS17800	BEP52_RS09735	BJP78_RS09730	BJP74_RS09285	DFS55_RS09295	DBO90_RS03420	EX350_RS07090	FCV17_RS20295	FCV16_RS12835	FCV18_RS04330	JPH1_RS17180
MAV_RS18865	MAH_RS16475	BBJ32_RS14495	KV38_RS17645	BS641_RS20045	BEP52_RS17470	BJP78_RS17870	BJP74_RS17160	DFS55_RS06940	DBO90_RS02290	EX350_RS04805	FCV17_RS22545	FCV16_RS15080	FCV18_RS06580	JPH1_RS19425
MAV_RS00640	MAH_RS00725	BBJ32_RS11580	KV38_RS00625	BS641_RS00675	BEP52_RS00625	BJP78_RS00635	BJP74_RS00610	DFS55_RS24215	DBO90_RS00655	EX350_RS23150	FCV17_RS05575	FCV16_RS22290	FCV18_RS13780	JPH1_RS00635
MAV_RS06510	MAH_RS05990	BBJ32_RS02265	KV38_RS06245	BS641_RS07785	BEP52_RS06535	BJP78_RS06530	BJP74_RS06075	DFS55_RS18620	DBO90_RS14665	EX350_RS16325	FCV17_RS11455	FCV16_RS03995	FCV18_RS20315	JPH1_RS07865
MAV_RS02225	MAH_RS02100	BBJ32_RS10195	KV38_RS02165	BS641_RS02110	BEP52_RS02055	BJP78_RS02060	BJP74_RS02040	DFS55_RS22585	DBO90_RS04885	EX350_RS21605	FCV17_RS07020	FCV16_RS23740	FCV18_RS15225	JPH1_RS02070
MAV_RS08070	MAH_RS07335	BBJ32_RS00860	KV38_RS07830	BS641_RS15270	BEP52_RS07925	BJP78_RS07910	BJP74_RS07450	DFS55_RS16960	DBO90_RS13225	EX350_RS14810	FCV17_RS19185	FCV16_RS11725	FCV18_RS03215	JPH1_RS09665
MAV_RS19385	MAH_RS16985	BBJ32_RS04120	KV38_RS18605	BS641_RS20585	BEP52_RS17990	BJP78_RS18390	BJP74_RS17680	DFS55_RS06430	DBO90_RS01710	EX350_RS04285	FCV17_RS23065	FCV16_RS15600	FCV18_RS07100	JPH1_RS19945
MAV_RS03630	MAH_RS03275	BBJ32_RS13130	KV38_RS03355	BS641_RS03655	BEP52_RS03255	BJP78_RS03260	BJP74_RS03230	DFS55_RS21395	DBO90_RS17475	EX350_RS20420	FCV17_RS08210	FCV16_RS24930	FCV18_RS16415	JPH1_RS03255
MAV_RS20085	MAH_RS17675	BBJ32_RS04830	KV38_RS19415	BS641_RS21275	BEP52_RS18735	BJP78_RS19135	BJP74_RS18425	DFS55_RS05525	DBO90_RS18240	EX350_RS03590	FCV17_RS23755	FCV16_RS16300	FCV18_RS07800	JPH1_RS20640
MAV_RS11970	MAH_RS12895	BBJ32_RS20915	KV38_RS11000	BS641_RS11950	BEP52_RS13935	BJP78_RS14190	BJP74_RS12030	DFS55_RS13810	DBO90_RS08695	EX350_RS11655	FCV17_RS16260	FCV16_RS08800	FCV18_RS25140	JPH1_RS12660
MAV_RS06395	MAH_RS05870	BBJ32_RS02380	KV38_RS06125	BS641_RS07665	BEP52_RS06415	BJP78_RS06410	BJP74_RS05955	DFS55_RS18740	DBO90_RS14785	EX350_RS16445	FCV17_RS11335	FCV16_RS03875	FCV18_RS20195	JPH1_RS07745
MAV_RS08425	MAH_RS07675	BBJ32_RS00520	KV38_RS08175	BS641_RS14925	BEP52_RS08265	BJP78_RS08250	BJP74_RS07790	DFS55_RS16610	DBO90_RS12885	EX350_RS14465	FCV17_RS18840	FCV16_RS11380	FCV18_RS02870	JPH1_RS10005
MAV_RS07765	MAH_RS07040	BBJ32_RS01200	KV38_RS07390	BS641_RS15580	BEP52_RS07610	BJP78_RS07595	BJP74_RS07135	DFS55_RS17370	DBO90_RS13575	EX350_RS15125	FCV17_RS19495	FCV16_RS12035	FCV18_RS03525	JPH1_RS09355
MAV_RS06615	MAH_RS06100	BBJ32_RS02150	KV38_RS06355	BS641_RS07895	BEP52_RS06645	BJP78_RS06640	BJP74_RS06185	DFS55_RS18505	DBO90_RS14550	EX350_RS16210	FCV17_RS11565	FCV16_RS04105	FCV18_RS20425	JPH1_RS07975
MAV_RS25290	MAH_RS22515	BBJ32_RS09680	KV38_RS24365	BS641_RS26270	BEP52_RS23835	BJP78_RS24240	BJP74_RS23470	DFS55_RS00555	DBO90_RS23190	EX350_RS24185	FCV17_RS04635	FCV16_RS21350	FCV18_RS12840	JPH1_RS25660
MAV_RS06165	MAH_RS05640	BBJ32_RS02615	KV38_RS05880	BS641_RS07430	BEP52_RS06170	BJP78_RS06165	BJP74_RS05710	DFS55_RS18985	DBO90_RS15030	EX350_RS16695	FCV17_RS11090	FCV16_RS03630	FCV18_RS19940	JPH1_RS07500
MAV_RS01125	MAH_RS01210	BBJ32_RS11095	KV38_RS01115	BS641_RS01195	BEP52_RS01110	BJP78_RS01120	BJP74_RS01095	DFS55_RS23730	DBO90_RS03975	EX350_RS22665	FCV17_RS06060	FCV16_RS22780	FCV18_RS14265	JPH1_RS01120
MAV_RS17215	MAH_RS14740	BBJ32_RS16040	KV38_RS15885	BS641_RS18445	BEP52_RS15835	BJP78_RS16085	BJP74_RS15525	DFS55_RS08690	DBO90_RS09650	EX350_RS06445	FCV17_RS20935	FCV16_RS13475	FCV18_RS04970	JPH1_RS17825
MAV_RS03655	MAH_RS03300	BBJ32_RS13150	KV38_RS03375	BS641_RS03675	BEP52_RS03275	BJP78_RS03280	BJP74_RS03250	DFS55_RS21375	DBO90_RS17450	EX350_RS20400	FCV17_RS08230	FCV16_RS24950	FCV18_RS16435	JPH1_RS03275
MAV_RS05285	MAH_RS04705	BBJ32_RS03525	KV38_RS04915	BS641_RS06485	BEP52_RS05230	BJP78_RS05225	BJP74_RS04770	DFS55_RS19945	DBO90_RS15965	EX350_RS17655	FCV17_RS10170	FCV16_RS02705	FCV18_RS18925	JPH1_RS06520
MAV_RS00845	MAH_RS00930	BBJ32_RS11375	KV38_RS00830	BS641_RS00895	BEP52_RS00830	BJP78_RS00840	BJP74_RS00815	DFS55_RS24010	DBO90_RS03690	EX350_RS22945	FCV17_RS05780	FCV16_RS22500	FCV18_RS13985	JPH1_RS00840
MAV_RS12990	MAH_RS12585	BBJ32_RS21110	KV38_RS11210	BS641_RS11265	BEP52_RS13660	BJP78_RS13645	BJP74_RS12280	DFS55_RS13450	DBO90_RS08485	EX350_RS11270	FCV17_RS15980	FCV16_RS08520	FCV18_RS24860	JPH1_RS12915
MAV_RS20330	MAH_RS17920	BBJ32_RS05080	KV38_RS19670	BS641_RS21530	BEP52_RS18990	BJP78_RS19390	BJP74_RS18680	DFS55_RS05270	DBO90_RS18495	EX350_RS03335	FCV17_RS24050	FCV16_RS16585	FCV18_RS08090	JPH1_RS20895
MAV_RS22880	MAH_RS20490	BBJ32_RS07630	KV38_RS22320	BS641_RS24190	BEP52_RS21775	BJP78_RS22175	BJP74_RS21410	DFS55_RS02605	DBO90_RS21085	EX350_RS00615	FCV17_RS02515	FCV16_RS19255	FCV18_RS10755	JPH1_RS23555
MAV_RS11470	MAH_RS13345	BBJ32_RS20470	KV38_RS10480	BS641_RS12455	BEP52_RS14430	BJP78_RS14685	BJP74_RS11535	DFS55_RS14310	DBO90_RS09160	EX350_RS12170	FCV17_RS16780	FCV16_RS09320	FCV18_RS00810	JPH1_RS12145
MAV_RS19365	MAH_RS16965	BBJ32_RS04100	KV38_RS18585	BS641_RS20565	BEP52_RS17970	BJP78_RS18370	BJP74_RS17660	DFS55_RS06450	DBO90_RS01730	EX350_RS04305	FCV17_RS23045	FCV16_RS15580	FCV18_RS07080	JPH1_RS19925
MAV_RS03040	MAH_RS02745	BBJ32_RS12595	KV38_RS02820	BS641_RS02790	BEP52_RS02720	BJP78_RS02725	BJP74_RS02695	DFS55_RS21930	DBO90_RS01220	EX350_RS20950	FCV17_RS07675	FCV16_RS24395	FCV18_RS15880	JPH1_RS02725
MAV_RS07985	MAH_RS07260	BBJ32_RS00935	KV38_RS07750	BS641_RS15350	BEP52_RS07845	BJP78_RS07830	BJP74_RS07370	DFS55_RS17040	DBO90_RS13300	EX350_RS14895	FCV17_RS19265	FCV16_RS11805	FCV18_RS03295	JPH1_RS09585
MAV_RS13105	MAH_RS12465	BBJ32_RS21235	KV38_RS11330	BS641_RS11145	BEP52_RS13540	BJP78_RS13525	BJP74_RS12405	DFS55_RS13330	DBO90_RS08365	EX350_RS11150	FCV17_RS15860	FCV16_RS08400	FCV18_RS24740	JPH1_RS13035
MAV_RS03715	MAH_RS03360	BBJ32_RS13210	KV38_RS03440	BS641_RS03740	BEP52_RS03340	BJP78_RS03345	BJP74_RS03315	DFS55_RS21305	DBO90_RS17385	EX350_RS20330	FCV17_RS08295	FCV16_RS25015	FCV18_RS16500	JPH1_RS03345
MAV_RS07775	MAH_RS07050	BBJ32_RS01190	KV38_RS07405	BS641_RS15565	BEP52_RS07625	BJP78_RS07610	BJP74_RS07150	DFS55_RS17355	DBO90_RS13560	EX350_RS15110	FCV17_RS19480	FCV16_RS12020	FCV18_RS03510	JPH1_RS09370
MAV_RS17285	MAH_RS14810	BBJ32_RS15970	KV38_RS15955	BS641_RS18510	BEP52_RS15905	BJP78_RS16155	BJP74_RS15595	DFS55_RS08620	DBO90_RS09720	EX350_RS06375	FCV17_RS21000	FCV16_RS13540	FCV18_RS05035	JPH1_RS17890
MAV_RS17640	MAH_RS15190	BBJ32_RS15625	KV38_RS16315	BS641_RS18865	BEP52_RS16305	BJP78_RS16555	BJP74_RS15995	DFS55_RS08260	DBO90_RS10080	EX350_RS06020	FCV17_RS21355	FCV16_RS13895	FCV18_RS05390	JPH1_RS18250
MAV_RS19770	MAH_RS17380	BBJ32_RS04505	KV38_RS18995	BS641_RS20970	BEP52_RS18385	BJP78_RS18785	BJP74_RS18075	DFS55_RS06040	DBO90_RS17915	EX350_RS03895	FCV17_RS23460	FCV16_RS15995	FCV18_RS07495	JPH1_RS20335
MAV_RS01685	MAH_RS01550	BBJ32_RS10740	KV38_RS01480	BS641_RS01550	BEP52_RS01480	BJP78_RS01485	BJP74_RS01465	DFS55_RS23280	DBO90_RS04330	EX350_RS22195	FCV17_RS06455	FCV16_RS23175	FCV18_RS14660	JPH1_RS01495
MAV_RS19655	MAH_RS17265	BBJ32_RS04390	KV38_RS18875	BS641_RS20855	BEP52_RS18265	BJP78_RS18665	BJP74_RS17955	DFS55_RS06155	DBO90_RS17800	EX350_RS04015	FCV17_RS23345	FCV16_RS15880	FCV18_RS07380	JPH1_RS20215
MAV_RS17495	MAH_RS15045	BBJ32_RS15770	KV38_RS16165	BS641_RS18715	BEP52_RS16155	BJP78_RS16405	BJP74_RS15845	DFS55_RS08410	DBO90_RS09930	EX350_RS06170	FCV17_RS21205	FCV16_RS13745	FCV18_RS05240	JPH1_RS18100
MAV_RS15730	MAH_RS09940	BBJ32_RS17635	KV38_RS14435	BS641_RS16765	BEP52_RS10600	BJP78_RS10585	BJP74_RS10310	DFS55_RS10145	DBO90_RS05815	EX350_RS07975	FCV17_RS12820	FCV16_RS05365	FCV18_RS21685	JPH1_RS16255
MAV_RS07860	MAH_RS07135	BBJ32_RS01060	KV38_RS07505	BS641_RS15480	BEP52_RS07710	BJP78_RS07695	BJP74_RS07235	DFS55_RS17270	DBO90_RS13430	EX350_RS15025	FCV17_RS19395	FCV16_RS11935	FCV18_RS03425	JPH1_RS09455
MAV_RS16995	MAH_RS14530	BBJ32_RS16245	KV38_RS15680	BS641_RS18240	BEP52_RS15630	BJP78_RS15880	BJP74_RS15320	DFS55_RS08895	DBO90_RS09445	EX350_RS06655	FCV17_RS20730	FCV16_RS13270	FCV18_RS04765	JPH1_RS17615
MAV_RS03720	MAH_RS03365	BBJ32_RS13215	KV38_RS03445	BS641_RS03745	BEP52_RS03345	BJP78_RS03350	BJP74_RS03320	DFS55_RS21300	DBO90_RS17380	EX350_RS20325	FCV17_RS08300	FCV16_RS25020	FCV18_RS16505	JPH1_RS03350
MAV_RS22415	MAH_RS20025	BBJ32_RS07165	KV38_RS21850	BS641_RS23715	BEP52_RS21305	BJP78_RS21700	BJP74_RS20940	DFS55_RS03100	DBO90_RS20615	EX350_RS01090	FCV17_RS02020	FCV16_RS18760	FCV18_RS10265	JPH1_RS23060
MAV_RS25220	MAH_RS22445	BBJ32_RS09610	KV38_RS24295	BS641_RS26200	BEP52_RS23765	BJP78_RS24170	BJP74_RS23400	DFS55_RS00625	DBO90_RS23120	EX350_RS24255	FCV17_RS04565	FCV16_RS21280	FCV18_RS12770	JPH1_RS25590
MAV_RS06745	MAH_RS06230	BBJ32_RS02020	KV38_RS06485	BS641_RS08025	BEP52_RS06775	BJP78_RS06770	BJP74_RS06315	DFS55_RS18375	DBO90_RS14420	EX350_RS16080	FCV17_RS11695	FCV16_RS04235	FCV18_RS20555	JPH1_RS08105
MAV_RS23265	MAH_RS20870	BBJ32_RS08015	KV38_RS22710	BS641_RS24620	BEP52_RS22170	BJP78_RS22570	BJP74_RS21810	DFS55_RS02215	DBO90_RS21475	EX350_RS00155	FCV17_RS02940	FCV16_RS19680	FCV18_RS11180	JPH1_RS24005
MAV_RS25280	MAH_RS22505	BBJ32_RS09670	KV38_RS24355	BS641_RS26260	BEP52_RS23825	BJP78_RS24230	BJP74_RS23460	DFS55_RS00565	DBO90_RS23180	EX350_RS24195	FCV17_RS04625	FCV16_RS21340	FCV18_RS12830	JPH1_RS25650
MAV_RS05375	MAH_RS04830	BBJ32_RS03430	KV38_RS05050	BS641_RS06585	BEP52_RS05345	BJP78_RS05340	BJP74_RS04885	DFS55_RS19830	DBO90_RS15860	EX350_RS17520	FCV17_RS10310	FCV16_RS02850	FCV18_RS19065	JPH1_RS06630
MAV_RS20960	MAH_RS18545	BBJ32_RS05710	KV38_RS20305	BS641_RS22185	BEP52_RS19775	BJP78_RS20025	BJP74_RS19415	DFS55_RS04640	DBO90_RS19135	EX350_RS02645	FCV17_RS00500	FCV16_RS17240	FCV18_RS08745	JPH1_RS21565
MAV_RS06180	MAH_RS05655	BBJ32_RS02600	KV38_RS05905	BS641_RS07445	BEP52_RS06195	BJP78_RS06190	BJP74_RS05735	DFS55_RS18960	DBO90_RS15005	EX350_RS16670	FCV17_RS11115	FCV16_RS03655	FCV18_RS19965	JPH1_RS07525
MAV_RS06780	MAH_RS06265	BBJ32_RS01995	KV38_RS06520	BS641_RS08060	BEP52_RS06810	BJP78_RS06805	BJP74_RS06350	DFS55_RS18340	DBO90_RS14380	EX350_RS16045	FCV17_RS11730	FCV16_RS04270	FCV18_RS20590	JPH1_RS08140
MAV_RS04860	MAH_RS04280	BBJ32_RS14070	KV38_RS04480	BS641_RS06055	BEP52_RS04350	BJP78_RS04355	BJP74_RS04320	DFS55_RS20375	DBO90_RS16410	EX350_RS18090	FCV17_RS09730	FCV16_RS02265	FCV18_RS18490	JPH1_RS06085
MAV_RS03725	MAH_RS03370	BBJ32_RS13220	KV38_RS03450	BS641_RS03750	BEP52_RS03350	BJP78_RS03355	BJP74_RS03325	DFS55_RS21295	DBO90_RS17375	EX350_RS20320	FCV17_RS08305	FCV16_RS25025	FCV18_RS16510	JPH1_RS03355
MAV_RS02780	MAH_RS02485	BBJ32_RS12335	KV38_RS02560	BS641_RS02505	BEP52_RS02450	BJP78_RS02455	BJP74_RS02435	DFS55_RS22190	DBO90_RS00960	EX350_RS21210	FCV17_RS07415	FCV16_RS24135	FCV18_RS15620	JPH1_RS02465
MAV_RS21985	MAH_RS19590	BBJ32_RS06735	KV38_RS21385	BS641_RS23235	BEP52_RS20840	BJP78_RS21235	BJP74_RS20475	DFS55_RS03560	DBO90_RS20165	EX350_RS01550	FCV17_RS01555	FCV16_RS18295	FCV18_RS09800	JPH1_RS22600
MAV_RS22845	MAH_RS20455	BBJ32_RS07595	KV38_RS22285	BS641_RS24155	BEP52_RS21740	BJP78_RS22140	BJP74_RS21375	DFS55_RS02640	DBO90_RS21050	EX350_RS00650	FCV17_RS02480	FCV16_RS19220	FCV18_RS10720	JPH1_RS23520
MAV_RS09735	MAH_RS08170	BBJ32_RS18945	KV38_RS08690	BS641_RS14400	BEP52_RS08790	BJP78_RS08775	BJP74_RS08325	DFS55_RS16105	DBO90_RS11940	EX350_RS13885	FCV17_RS18340	FCV16_RS10880	FCV18_RS02370	JPH1_RS10555
MAV_RS04450	MAH_RS03815	BBJ32_RS13660	KV38_RS04020	BS641_RS05645	BEP52_RS03890	BJP78_RS03890	BJP74_RS03860	DFS55_RS20785	DBO90_RS16815	EX350_RS18500	FCV17_RS09320	FCV16_RS01855	FCV18_RS18080	JPH1_RS05665
MAV_RS03735	MAH_RS03380	BBJ32_RS13230	KV38_RS03460	BS641_RS03760	BEP52_RS03360	BJP78_RS03365	BJP74_RS03335	DFS55_RS21285	DBO90_RS17365	EX350_RS20310	FCV17_RS08315	FCV16_RS25035	FCV18_RS16520	JPH1_RS03365
MAV_RS08285	MAH_RS07535	BBJ32_RS00660	KV38_RS08035	BS641_RS15065	BEP52_RS08125	BJP78_RS08110	BJP74_RS07650	DFS55_RS16750	DBO90_RS13025	EX350_RS14605	FCV17_RS18980	FCV16_RS11520	FCV18_RS03010	JPH1_RS09865
MAV_RS03740	MAH_RS03385	BBJ32_RS13235	KV38_RS03465	BS641_RS03765	BEP52_RS03365	BJP78_RS03370	BJP74_RS03340	DFS55_RS21280	DBO90_RS17360	EX350_RS20305	FCV17_RS08320	FCV16_RS25040	FCV18_RS16525	JPH1_RS03370
MAV_RS01710	MAH_RS01575	BBJ32_RS10715	KV38_RS01505	BS641_RS01575	BEP52_RS01505	BJP78_RS01510	BJP74_RS01490	DFS55_RS23255	DBO90_RS04355	EX350_RS22170	FCV17_RS06480	FCV16_RS23200	FCV18_RS14685	JPH1_RS01520
MAV_RS25060	MAH_RS22290	BBJ32_RS09450	KV38_RS24135	BS641_RS26040	BEP52_RS23610	BJP78_RS24015	BJP74_RS23245	DFS55_RS00785	DBO90_RS22955	EX350_RS24415	FCV17_RS04370	FCV16_RS21110	FCV18_RS12600	JPH1_RS25430
MAV_RS20420	MAH_RS18010	BBJ32_RS05175	KV38_RS19760	BS641_RS21620	BEP52_RS19080	BJP78_RS19480	BJP74_RS18770	DFS55_RS05180	DBO90_RS18590	EX350_RS03245	FCV17_RS24140	FCV16_RS16675	FCV18_RS08180	JPH1_RS20985
MAV_RS23885	MAH_RS21490	BBJ32_RS08640	KV38_RS23345	BS641_RS25255	BEP52_RS22810	BJP78_RS23215	BJP74_RS22445	DFS55_RS01575	DBO90_RS22115	EX350_RS25200	FCV17_RS03590	FCV16_RS20330	FCV18_RS11820	JPH1_RS24645
MAV_RS21315	MAH_RS18900	BBJ32_RS06065	KV38_RS20670	BS641_RS22545	BEP52_RS20140	BJP78_RS20390	BJP74_RS19780	DFS55_RS04275	DBO90_RS19495	EX350_RS02280	FCV17_RS00865	FCV16_RS17605	FCV18_RS09110	JPH1_RS21930
MAV_RS06650	MAH_RS06135	BBJ32_RS02115	KV38_RS06390	BS641_RS07930	BEP52_RS06680	BJP78_RS06675	BJP74_RS06220	DFS55_RS18470	DBO90_RS14515	EX350_RS16175	FCV17_RS11600	FCV16_RS04140	FCV18_RS20460	JPH1_RS08010
MAV_RS23795	MAH_RS21400	BBJ32_RS08550	KV38_RS23255	BS641_RS25165	BEP52_RS22720	BJP78_RS23125	BJP74_RS22355	DFS55_RS01665	DBO90_RS22025	EX350_RS25290	FCV17_RS03500	FCV16_RS20240	FCV18_RS11730	JPH1_RS24555
MAV_RS12930	MAH_RS12645	BBJ32_RS21050	KV38_RS11150	BS641_RS11325	BEP52_RS13720	BJP78_RS13705	BJP74_RS12220	DFS55_RS13510	DBO90_RS08545	EX350_RS11335	FCV17_RS16070	FCV16_RS08610	FCV18_RS24950	JPH1_RS12855
MAV_RS05295	MAH_RS04715	BBJ32_RS03515	KV38_RS04925	BS641_RS06495	BEP52_RS05240	BJP78_RS05235	BJP74_RS04780	DFS55_RS19935	DBO90_RS15955	EX350_RS17645	FCV17_RS10180	FCV16_RS02715	FCV18_RS18935	JPH1_RS06530
MAV_RS02500	MAH_RS02205	BBJ32_RS10090	KV38_RS02275	BS641_RS02220	BEP52_RS02165	BJP78_RS02170	BJP74_RS02150	DFS55_RS22475	DBO90_RS04995	EX350_RS21495	FCV17_RS07130	FCV16_RS23850	FCV18_RS15335	JPH1_RS02180
MAV_RS04080	MAH_RS03435	BBJ32_RS13290	KV38_RS03645	BS641_RS05270	BEP52_RS03515	BJP78_RS03515	BJP74_RS03485	DFS55_RS21160	DBO90_RS17195	EX350_RS18880	FCV17_RS08945	FCV16_RS01480	FCV18_RS17705	JPH1_RS05285
MAV_RS06305	MAH_RS05780	BBJ32_RS02470	KV38_RS06035	BS641_RS07575	BEP52_RS06325	BJP78_RS06320	BJP74_RS05865	DFS55_RS18830	DBO90_RS14875	EX350_RS16535	FCV17_RS11245	FCV16_RS03785	FCV18_RS20095	JPH1_RS07655
MAV_RS13130	MAH_RS12440	BBJ32_RS21260	KV38_RS11355	BS641_RS11120	BEP52_RS13515	BJP78_RS13500	BJP74_RS12430	DFS55_RS13305	DBO90_RS08340	EX350_RS11125	FCV17_RS15835	FCV16_RS08375	FCV18_RS24715	JPH1_RS13060
MAV_RS21190	MAH_RS18775	BBJ32_RS05940	KV38_RS20545	BS641_RS22420	BEP52_RS20015	BJP78_RS20265	BJP74_RS19655	DFS55_RS04400	DBO90_RS19370	EX350_RS02405	FCV17_RS00740	FCV16_RS17480	FCV18_RS08985	JPH1_RS21805
MAV_RS01740	MAH_RS01605	BBJ32_RS10685	KV38_RS01535	BS641_RS01605	BEP52_RS01535	BJP78_RS01540	BJP74_RS01520	DFS55_RS23225	DBO90_RS04385	EX350_RS22140	FCV17_RS06510	FCV16_RS23230	FCV18_RS14715	JPH1_RS01550
MAV_RS22565	MAH_RS20175	BBJ32_RS07315	KV38_RS22005	BS641_RS23875	BEP52_RS21460	BJP78_RS21860	BJP74_RS21095	DFS55_RS02940	DBO90_RS20770	EX350_RS00930	FCV17_RS02175	FCV16_RS18915	FCV18_RS10420	JPH1_RS23215
MAV_RS22175	MAH_RS19780	BBJ32_RS06925	KV38_RS21580	BS641_RS23425	BEP52_RS21035	BJP78_RS21430	BJP74_RS20670	DFS55_RS03365	DBO90_RS20360	EX350_RS01355	FCV17_RS01750	FCV16_RS18490	FCV18_RS09995	JPH1_RS22795
MAV_RS16560	MAH_RS09125	BBJ32_RS16800	KV38_RS15255	BS641_RS17775	BEP52_RS09760	BJP78_RS09755	BJP74_RS09310	DFS55_RS09320	DBO90_RS03445	EX350_RS07115	FCV17_RS20270	FCV16_RS12810	FCV18_RS04305	JPH1_RS17155
MAV_RS02840	MAH_RS02545	BBJ32_RS12395	KV38_RS02620	BS641_RS02565	BEP52_RS02510	BJP78_RS02515	BJP74_RS02495	DFS55_RS22130	DBO90_RS01020	EX350_RS21150	FCV17_RS07475	FCV16_RS24195	FCV18_RS15680	JPH1_RS02525
MAV_RS08250	MAH_RS07500	BBJ32_RS00695	KV38_RS08000	BS641_RS15100	BEP52_RS08090	BJP78_RS08075	BJP74_RS07615	DFS55_RS16785	DBO90_RS13060	EX350_RS14640	FCV17_RS19015	FCV16_RS11555	FCV18_RS03045	JPH1_RS09835
MAV_RS05495	MAH_RS05000	BBJ32_RS03255	KV38_RS05225	BS641_RS06770	BEP52_RS05520	BJP78_RS05515	BJP74_RS05060	DFS55_RS19645	DBO90_RS15685	EX350_RS17345	FCV17_RS10390	FCV16_RS02930	FCV18_RS19240	JPH1_RS06805
MAV_RS04135	MAH_RS03490	BBJ32_RS13345	KV38_RS03700	BS641_RS05325	BEP52_RS03570	BJP78_RS03570	BJP74_RS03540	DFS55_RS21105	DBO90_RS17140	EX350_RS18825	FCV17_RS09000	FCV16_RS01535	FCV18_RS17760	JPH1_RS05345
MAV_RS13665	MAH_RS11925	BBJ32_RS21810	KV38_RS11860	BS641_RS10560	BEP52_RS12985	BJP78_RS12970	BJP74_RS12960	DFS55_RS12805	DBO90_RS07765	EX350_RS10580	FCV17_RS15300	FCV16_RS07840	FCV18_RS24180	JPH1_RS13610
MAV_RS05785	MAH_RS05290	BBJ32_RS02965	KV38_RS05515	BS641_RS07075	BEP52_RS05810	BJP78_RS05805	BJP74_RS05350	DFS55_RS19340	DBO90_RS15395	EX350_RS17055	FCV17_RS10680	FCV16_RS03220	FCV18_RS19530	JPH1_RS07130
MAV_RS13695	MAH_RS11895	BBJ32_RS21840	KV38_RS11890	BS641_RS10530	BEP52_RS12955	BJP78_RS12940	BJP74_RS12990	DFS55_RS12775	DBO90_RS07735	EX350_RS10550	FCV17_RS15270	FCV16_RS07810	FCV18_RS24150	JPH1_RS13640
MAV_RS00285	MAH_RS00395	BBJ32_RS11935	KV38_RS00290	BS641_RS00310	BEP52_RS00290	BJP78_RS00300	BJP74_RS00275	DFS55_RS00290	DBO90_RS00295	EX350_RS23485	FCV17_RS05255	FCV16_RS21970	FCV18_RS13465	JPH1_RS00310
MAV_RS01895	MAH_RS01760	BBJ32_RS10525	KV38_RS01825	BS641_RS01770	BEP52_RS01705	BJP78_RS01710	BJP74_RS01690	DFS55_RS22940	DBO90_RS04545	EX350_RS21970	FCV17_RS06675	FCV16_RS23395	FCV18_RS14880	JPH1_RS01715
MAV_RS23995	MAH_RS21600	BBJ32_RS08750	KV38_RS23460	BS641_RS25370	BEP52_RS22895	BJP78_RS23300	BJP74_RS22530	DFS55_RS01460	DBO90_RS22230	EX350_RS25085	FCV17_RS03705	FCV16_RS20445	FCV18_RS11935	JPH1_RS24760
MAV_RS05890	MAH_RS05395	BBJ32_RS02860	KV38_RS05620	BS641_RS07180	BEP52_RS05915	BJP78_RS05910	BJP74_RS05455	DFS55_RS19235	DBO90_RS15290	EX350_RS16950	FCV17_RS10785	FCV16_RS03325	FCV18_RS19635	JPH1_RS07235
MAV_RS13530	MAH_RS12060	BBJ32_RS21675	KV38_RS11720	BS641_RS10695	BEP52_RS13120	BJP78_RS13105	BJP74_RS12825	DFS55_RS12940	DBO90_RS07900	EX350_RS10710	FCV17_RS15435	FCV16_RS07975	FCV18_RS24315	JPH1_RS13475
MAV_RS11930	MAH_RS12935	BBJ32_RS20875	KV38_RS10960	BS641_RS11990	BEP52_RS13975	BJP78_RS14230	BJP74_RS11990	DFS55_RS13850	DBO90_RS08735	EX350_RS11695	FCV17_RS16300	FCV16_RS08840	FCV18_RS25180	JPH1_RS12620
MAV_RS21095	MAH_RS18680	BBJ32_RS05845	KV38_RS20445	BS641_RS22320	BEP52_RS19915	BJP78_RS20165	BJP74_RS19555	DFS55_RS04500	DBO90_RS19270	EX350_RS02505	FCV17_RS00640	FCV16_RS17380	FCV18_RS08885	JPH1_RS21705
MAV_RS04170	MAH_RS03525	BBJ32_RS13380	KV38_RS03735	BS641_RS05360	BEP52_RS03605	BJP78_RS03605	BJP74_RS03575	DFS55_RS21070	DBO90_RS17100	EX350_RS18785	FCV17_RS09035	FCV16_RS01570	FCV18_RS17795	JPH1_RS05380
MAV_RS20950	MAH_RS18535	BBJ32_RS05700	KV38_RS20295	BS641_RS22175	BEP52_RS19765	BJP78_RS20015	BJP74_RS19405	DFS55_RS04650	DBO90_RS19125	EX350_RS02655	FCV17_RS00490	FCV16_RS17230	FCV18_RS08735	JPH1_RS21555
MAV_RS06155	MAH_RS05630	BBJ32_RS02625	KV38_RS05870	BS641_RS07420	BEP52_RS06160	BJP78_RS06155	BJP74_RS05700	DFS55_RS18995	DBO90_RS15040	EX350_RS16705	FCV17_RS11080	FCV16_RS03620	FCV18_RS19930	JPH1_RS07490
MAV_RS15045	MAH_RS10585	BBJ32_RS18285	KV38_RS13710	BS641_RS08540	BEP52_RS11270	BJP78_RS11255	BJP74_RS14670	DFS55_RS10845	DBO90_RS06505	EX350_RS08625	FCV17_RS13500	FCV16_RS06040	FCV18_RS22350	JPH1_RS15615
MAV_RS05545	MAH_RS05050	BBJ32_RS03205	KV38_RS05275	BS641_RS06820	BEP52_RS05570	BJP78_RS05565	BJP74_RS05110	DFS55_RS19595	DBO90_RS15635	EX350_RS17295	FCV17_RS10440	FCV16_RS02980	FCV18_RS19290	JPH1_RS06855
MAV_RS05955	MAH_RS05430	BBJ32_RS02825	KV38_RS05660	BS641_RS07220	BEP52_RS05955	BJP78_RS05950	BJP74_RS05495	DFS55_RS19195	DBO90_RS15250	EX350_RS16910	FCV17_RS10845	FCV16_RS03385	FCV18_RS19695	JPH1_RS07280
MAV_RS13210	MAH_RS12360	BBJ32_RS21350	KV38_RS11440	BS641_RS11040	BEP52_RS13430	BJP78_RS13415	BJP74_RS12515	DFS55_RS13220	DBO90_RS08240	EX350_RS11040	FCV17_RS15750	FCV16_RS08290	FCV18_RS24630	JPH1_RS13145
MAV_RS17355	MAH_RS14875	BBJ32_RS15905	KV38_RS16025	BS641_RS18580	BEP52_RS15975	BJP78_RS16225	BJP74_RS15665	DFS55_RS08550	DBO90_RS09790	EX350_RS06305	FCV17_RS21070	FCV16_RS13610	FCV18_RS05105	JPH1_RS17960
MAV_RS13680	MAH_RS11910	BBJ32_RS21825	KV38_RS11875	BS641_RS10545	BEP52_RS12970	BJP78_RS12955	BJP74_RS12975	DFS55_RS12790	DBO90_RS07750	EX350_RS10565	FCV17_RS15285	FCV16_RS07825	FCV18_RS24165	JPH1_RS13625
MAV_RS12960	MAH_RS12615	BBJ32_RS21080	KV38_RS11180	BS641_RS11295	BEP52_RS13690	BJP78_RS13675	BJP74_RS12250	DFS55_RS13480	DBO90_RS08515	EX350_RS11300	FCV17_RS16035	FCV16_RS08575	FCV18_RS24915	JPH1_RS12885
MAV_RS16365	MAH_RS09325	BBJ32_RS17020	KV38_RS15055	BS641_RS17400	BEP52_RS09980	BJP78_RS09965	BJP74_RS09680	DFS55_RS09515	DBO90_RS05195	EX350_RS07360	FCV17_RS12210	FCV16_RS04750	FCV18_RS21070	JPH1_RS16885
MAV_RS04175	MAH_RS03530	BBJ32_RS13385	KV38_RS03740	BS641_RS05365	BEP52_RS03610	BJP78_RS03610	BJP74_RS03580	DFS55_RS21065	DBO90_RS17095	EX350_RS18780	FCV17_RS09040	FCV16_RS01575	FCV18_RS17800	JPH1_RS05385
MAV_RS14845	MAH_RS10800	BBJ32_RS00055	KV38_RS13490	BS641_RS08765	BEP52_RS11495	BJP78_RS11480	BJP74_RS14445	DFS55_RS11070	DBO90_RS06740	EX350_RS08850	FCV17_RS13720	FCV16_RS06260	FCV18_RS22570	JPH1_RS15390
MAV_RS06555	MAH_RS06040	BBJ32_RS02215	KV38_RS06295	BS641_RS07835	BEP52_RS06585	BJP78_RS06580	BJP74_RS06125	DFS55_RS18570	DBO90_RS14615	EX350_RS16275	FCV17_RS11505	FCV16_RS04045	FCV18_RS20365	JPH1_RS07915
MAV_RS07740	MAH_RS07015	BBJ32_RS01225	KV38_RS07365	BS641_RS15605	BEP52_RS07585	BJP78_RS07570	BJP74_RS07110	DFS55_RS17395	DBO90_RS13600	EX350_RS15150	FCV17_RS19520	FCV16_RS12060	FCV18_RS03550	JPH1_RS09330
MAV_RS19395	MAH_RS16995	BBJ32_RS04130	KV38_RS18615	BS641_RS20595	BEP52_RS18000	BJP78_RS18400	BJP74_RS17690	DFS55_RS06420	DBO90_RS01700	EX350_RS04275	FCV17_RS23075	FCV16_RS15610	FCV18_RS07110	JPH1_RS19955
MAV_RS14905	MAH_RS10740	BBJ32_RS00115	KV38_RS13550	BS641_RS08705	BEP52_RS11435	BJP78_RS11420	BJP74_RS14505	DFS55_RS11010	DBO90_RS06680	EX350_RS08790	FCV17_RS13660	FCV16_RS06200	FCV18_RS22510	JPH1_RS15450
MAV_RS13995	MAH_RS11595	BBJ32_RS22125	KV38_RS12195	BS641_RS10235	BEP52_RS12660	BJP78_RS12645	BJP74_RS13285	DFS55_RS12465	DBO90_RS07450	EX350_RS10265	FCV17_RS14950	FCV16_RS07490	FCV18_RS23825	JPH1_RS13960
MAV_RS06550	MAH_RS06035	BBJ32_RS02220	KV38_RS06290	BS641_RS07830	BEP52_RS06580	BJP78_RS06575	BJP74_RS06120	DFS55_RS18575	DBO90_RS14620	EX350_RS16280	FCV17_RS11500	FCV16_RS04040	FCV18_RS20360	JPH1_RS07910
MAV_RS05265	MAH_RS04685	BBJ32_RS03545	KV38_RS04895	BS641_RS06465	BEP52_RS05210	BJP78_RS05205	BJP74_RS04750	DFS55_RS19965	DBO90_RS15985	EX350_RS17675	FCV17_RS10150	FCV16_RS02685	FCV18_RS18905	JPH1_RS06500
MAV_RS13820	MAH_RS11770	BBJ32_RS21965	KV38_RS12015	BS641_RS10405	BEP52_RS12830	BJP78_RS12815	BJP74_RS13115	DFS55_RS12650	DBO90_RS07610	EX350_RS10425	FCV17_RS15145	FCV16_RS07685	FCV18_RS24020	JPH1_RS13765
MAV_RS22390	MAH_RS20000	BBJ32_RS07140	KV38_RS21820	BS641_RS23685	BEP52_RS21275	BJP78_RS21670	BJP74_RS20910	DFS55_RS03130	DBO90_RS20585	EX350_RS01120	FCV17_RS01990	FCV16_RS18730	FCV18_RS10235	JPH1_RS23030
MAV_RS19510	MAH_RS17120	BBJ32_RS04245	KV38_RS18730	BS641_RS20710	BEP52_RS18120	BJP78_RS18520	BJP74_RS17810	DFS55_RS06305	DBO90_RS17655	EX350_RS04160	FCV17_RS23200	FCV16_RS15735	FCV18_RS07235	JPH1_RS20070
MAV_RS23155	MAH_RS20765	BBJ32_RS07905	KV38_RS22600	BS641_RS24475	BEP52_RS22055	BJP78_RS22455	BJP74_RS21690	DFS55_RS02325	DBO90_RS21365	EX350_RS00310	FCV17_RS02795	FCV16_RS19535	FCV18_RS11035	JPH1_RS23855
MAV_RS14875	MAH_RS10770	BBJ32_RS00085	KV38_RS13520	BS641_RS08735	BEP52_RS11465	BJP78_RS11450	BJP74_RS14475	DFS55_RS11040	DBO90_RS06710	EX350_RS08820	FCV17_RS13690	FCV16_RS06230	FCV18_RS22540	JPH1_RS15420
MAV_RS15850	MAH_RS09820	BBJ32_RS17515	KV38_RS14555	BS641_RS16885	BEP52_RS10480	BJP78_RS10465	BJP74_RS10190	DFS55_RS10025	DBO90_RS05695	EX350_RS07855	FCV17_RS12700	FCV16_RS05245	FCV18_RS21565	JPH1_RS16375
MAV_RS05000	MAH_RS04425	BBJ32_RS03810	KV38_RS04630	BS641_RS06200	BEP52_RS04945	BJP78_RS04935	BJP74_RS04475	DFS55_RS20230	DBO90_RS16255	EX350_RS17940	FCV17_RS09880	FCV16_RS02415	FCV18_RS18640	JPH1_RS06235
MAV_RS19005	MAH_RS16610	BBJ32_RS14360	KV38_RS17780	BS641_RS20180	BEP52_RS17605	BJP78_RS18005	BJP74_RS17295	DFS55_RS06810	DBO90_RS02155	EX350_RS04670	FCV17_RS22680	FCV16_RS15215	FCV18_RS06715	JPH1_RS19560
MAV_RS00085	MAH_RS00210	BBJ32_RS09965	KV38_RS00090	BS641_RS00125	BEP52_RS00095	BJP78_RS00095	BJP74_RS00095	DFS55_RS00085	DBO90_RS00080	EX350_RS23690	FCV17_RS04960	FCV16_RS21675	FCV18_RS13165	JPH1_RS00120
MAV_RS17005	MAH_RS14540	BBJ32_RS16235	KV38_RS15690	BS641_RS18250	BEP52_RS15640	BJP78_RS15890	BJP74_RS15330	DFS55_RS08885	DBO90_RS09455	EX350_RS06645	FCV17_RS20740	FCV16_RS13280	FCV18_RS04775	JPH1_RS17625
MAV_RS18150	MAH_RS15695	BBJ32_RS15120	KV38_RS16840	BS641_RS19380	BEP52_RS16825	BJP78_RS17080	BJP74_RS16515	DFS55_RS07735	DBO90_RS02925	EX350_RS05490	FCV17_RS21890	FCV16_RS14425	FCV18_RS05925	JPH1_RS18775
MAV_RS22060	MAH_RS19665	BBJ32_RS06810	KV38_RS21460	BS641_RS23310	BEP52_RS20915	BJP78_RS21310	BJP74_RS20550	DFS55_RS03485	DBO90_RS20240	EX350_RS01475	FCV17_RS01630	FCV16_RS18370	FCV18_RS09875	JPH1_RS22675
MAV_RS04610	MAH_RS04025	BBJ32_RS13820	KV38_RS04225	BS641_RS05805	BEP52_RS04095	BJP78_RS04100	BJP74_RS04065	DFS55_RS20625	DBO90_RS16660	EX350_RS18340	FCV17_RS09480	FCV16_RS02015	FCV18_RS18240	JPH1_RS05825
MAV_RS19660	MAH_RS17270	BBJ32_RS04395	KV38_RS18880	BS641_RS20860	BEP52_RS18270	BJP78_RS18670	BJP74_RS17960	DFS55_RS06150	DBO90_RS17805	EX350_RS04010	FCV17_RS23350	FCV16_RS15885	FCV18_RS07385	JPH1_RS20220
MAV_RS03615	MAH_RS03265	BBJ32_RS13120	KV38_RS03345	BS641_RS03645	BEP52_RS03245	BJP78_RS03250	BJP74_RS03220	DFS55_RS21405	DBO90_RS17485	EX350_RS20430	FCV17_RS08200	FCV16_RS24920	FCV18_RS16405	JPH1_RS03245
MAV_RS21600	MAH_RS19185	BBJ32_RS06350	KV38_RS20955	BS641_RS22830	BEP52_RS20425	BJP78_RS20825	BJP74_RS20065	DFS55_RS03990	DBO90_RS19780	EX350_RS01995	FCV17_RS01150	FCV16_RS17890	FCV18_RS09395	JPH1_RS22215
MAV_RS13840	MAH_RS11750	BBJ32_RS21985	KV38_RS12035	BS641_RS10385	BEP52_RS12810	BJP78_RS12795	BJP74_RS13135	DFS55_RS12630	DBO90_RS07590	EX350_RS10405	FCV17_RS15125	FCV16_RS07665	FCV18_RS24000	JPH1_RS13785
MAV_RS01465	MAH_RS01335	BBJ32_RS10970	KV38_RS01250	BS641_RS01325	BEP52_RS01250	BJP78_RS01255	BJP74_RS01230	DFS55_RS23595	DBO90_RS04115	EX350_RS22525	FCV17_RS06200	FCV16_RS22920	FCV18_RS14405	JPH1_RS01265
MAV_RS25295	MAH_RS22520	BBJ32_RS09685	KV38_RS24370	BS641_RS26275	BEP52_RS23840	BJP78_RS24245	BJP74_RS23475	DFS55_RS00550	DBO90_RS23195	EX350_RS24180	FCV17_RS04640	FCV16_RS21355	FCV18_RS12845	JPH1_RS25665
MAV_RS01050	MAH_RS01135	BBJ32_RS11170	KV38_RS01040	BS641_RS01105	BEP52_RS01035	BJP78_RS01045	BJP74_RS01020	DFS55_RS23805	DBO90_RS03900	EX350_RS22740	FCV17_RS05985	FCV16_RS22705	FCV18_RS14190	JPH1_RS01045
MAV_RS06390	MAH_RS05865	BBJ32_RS02385	KV38_RS06120	BS641_RS07660	BEP52_RS06410	BJP78_RS06405	BJP74_RS05950	DFS55_RS18745	DBO90_RS14790	EX350_RS16450	FCV17_RS11330	FCV16_RS03870	FCV18_RS20190	JPH1_RS07740
MAV_RS13930	MAH_RS11660	BBJ32_RS22070	KV38_RS12130	BS641_RS10300	BEP52_RS12725	BJP78_RS12710	BJP74_RS13220	DFS55_RS12530	DBO90_RS07505	EX350_RS10315	FCV17_RS15015	FCV16_RS07555	FCV18_RS23890	JPH1_RS13890
MAV_RS03185	MAH_RS02890	BBJ32_RS12740	KV38_RS02965	BS641_RS03255	BEP52_RS02865	BJP78_RS02870	BJP74_RS02840	DFS55_RS21785	DBO90_RS01365	EX350_RS20805	FCV17_RS07825	FCV16_RS24545	FCV18_RS16030	JPH1_RS02870
MAV_RS04670	MAH_RS04090	BBJ32_RS13880	KV38_RS04290	BS641_RS05865	BEP52_RS04160	BJP78_RS04165	BJP74_RS04130	DFS55_RS20565	DBO90_RS16600	EX350_RS18280	FCV17_RS09540	FCV16_RS02075	FCV18_RS18300	JPH1_RS05885
MAV_RS03435	MAH_RS03075	BBJ32_RS12925	KV38_RS03160	BS641_RS03460	BEP52_RS03055	BJP78_RS03060	BJP74_RS03030	DFS55_RS21590	DBO90_RS01555	EX350_RS20615	FCV17_RS08015	FCV16_RS24735	FCV18_RS16220	JPH1_RS03060
MAV_RS13880	MAH_RS11705	BBJ32_RS22025	KV38_RS12080	BS641_RS10345	BEP52_RS12770	BJP78_RS12755	BJP74_RS13175	DFS55_RS12585	DBO90_RS07550	EX350_RS10365	FCV17_RS15085	FCV16_RS07625	FCV18_RS23960	JPH1_RS13825
MAV_RS18440	MAH_RS16045	BBJ32_RS14920	KV38_RS17200	BS641_RS19595	BEP52_RS17035	BJP78_RS17430	BJP74_RS16725	DFS55_RS07380	DBO90_RS02720	EX350_RS05255	FCV17_RS22095	FCV16_RS14630	FCV18_RS06130	JPH1_RS18980
MAV_RS05190	MAH_RS04610	BBJ32_RS03620	KV38_RS04815	BS641_RS06385	BEP52_RS05130	BJP78_RS05120	BJP74_RS04665	DFS55_RS20045	DBO90_RS16065	EX350_RS17755	FCV17_RS10070	FCV16_RS02605	FCV18_RS18825	JPH1_RS06420
MAV_RS07365	MAH_RS06620	BBJ32_RS01630	KV38_RS06950	BS641_RS15980	BEP52_RS07170	BJP78_RS07170	BJP74_RS06710	DFS55_RS17800	DBO90_RS14000	EX350_RS15530	FCV17_RS19895	FCV16_RS12435	FCV18_RS03930	JPH1_RS08950
MAV_RS09980	MAH_RS08400	BBJ32_RS19170	KV38_RS08925	BS641_RS14165	BEP52_RS09015	BJP78_RS09000	BJP74_RS08550	DFS55_RS15880	DBO90_RS11715	EX350_RS13660	FCV17_RS18115	FCV16_RS10655	FCV18_RS02145	JPH1_RS10785
MAV_RS16675	MAH_RS09010	BBJ32_RS16685	KV38_RS15370	BS641_RS17890	BEP52_RS09640	BJP78_RS09635	BJP74_RS09190	DFS55_RS09205	DBO90_RS03330	EX350_RS07000	FCV17_RS20385	FCV16_RS12925	FCV18_RS04420	JPH1_RS17275
MAV_RS18890	MAH_RS16500	BBJ32_RS14470	KV38_RS17670	BS641_RS20070	BEP52_RS17495	BJP78_RS17895	BJP74_RS17185	DFS55_RS06915	DBO90_RS02265	EX350_RS04780	FCV17_RS22570	FCV16_RS15105	FCV18_RS06605	JPH1_RS19450
MAV_RS19990	MAH_RS17580	BBJ32_RS04730	KV38_RS19315	BS641_RS21180	BEP52_RS18635	BJP78_RS19035	BJP74_RS18325	DFS55_RS05625	DBO90_RS18130	EX350_RS03690	FCV17_RS23655	FCV16_RS16200	FCV18_RS07700	JPH1_RS20540
MAV_RS07340	MAH_RS06595	BBJ32_RS01655	KV38_RS06925	BS641_RS16025	BEP52_RS07145	BJP78_RS07145	BJP74_RS06685	DFS55_RS17825	DBO90_RS14025	EX350_RS15555	FCV17_RS19920	FCV16_RS12460	FCV18_RS03955	JPH1_RS08925
MAV_RS04715	MAH_RS04135	BBJ32_RS13925	KV38_RS04335	BS641_RS05910	BEP52_RS04205	BJP78_RS04210	BJP74_RS04175	DFS55_RS20520	DBO90_RS16555	EX350_RS18235	FCV17_RS09585	FCV16_RS02120	FCV18_RS18345	JPH1_RS05940
MAV_RS03205	MAH_RS02910	BBJ32_RS12760	KV38_RS02985	BS641_RS03275	BEP52_RS02885	BJP78_RS02890	BJP74_RS02860	DFS55_RS21765	DBO90_RS01385	EX350_RS20785	FCV17_RS07845	FCV16_RS24565	FCV18_RS16050	JPH1_RS02890
MAV_RS11125	MAH_RS13695	BBJ32_RS20120	KV38_RS09915	BS641_RS12945	BEP52_RS14795	BJP78_RS15045	BJP74_RS11175	DFS55_RS14725	DBO90_RS10725	EX350_RS12645	FCV17_RS17120	FCV16_RS09660	FCV18_RS01150	JPH1_RS11810
MAV_RS06895	MAH_RS06380	BBJ32_RS01875	KV38_RS06635	BS641_RS08180	BEP52_RS06925	BJP78_RS06925	BJP74_RS06465	DFS55_RS18225	DBO90_RS14255	EX350_RS15930	FCV17_RS11845	FCV16_RS04385	FCV18_RS20705	JPH1_RS08255
MAV_RS05755	MAH_RS05260	BBJ32_RS02995	KV38_RS05485	BS641_RS07045	BEP52_RS05780	BJP78_RS05775	BJP74_RS05320	DFS55_RS19370	DBO90_RS15425	EX350_RS17085	FCV17_RS10650	FCV16_RS03190	FCV18_RS19500	JPH1_RS07100
MAV_RS01870	MAH_RS01735	BBJ32_RS10550	KV38_RS01795	BS641_RS01745	BEP52_RS01675	BJP78_RS01680	BJP74_RS01660	DFS55_RS22970	DBO90_RS04520	EX350_RS22000	FCV17_RS06645	FCV16_RS23365	FCV18_RS14850	JPH1_RS01685
MAV_RS07410	MAH_RS06665	BBJ32_RS01585	KV38_RS06995	BS641_RS15935	BEP52_RS07215	BJP78_RS07215	BJP74_RS06755	DFS55_RS17755	DBO90_RS13955	EX350_RS15485	FCV17_RS19850	FCV16_RS12390	FCV18_RS03885	JPH1_RS08995
MAV_RS13190	MAH_RS12380	BBJ32_RS21330	KV38_RS11420	BS641_RS11060	BEP52_RS13450	BJP78_RS13435	BJP74_RS12495	DFS55_RS13240	DBO90_RS08260	EX350_RS11060	FCV17_RS15770	FCV16_RS08310	FCV18_RS24650	JPH1_RS13125
MAV_RS20425	MAH_RS18015	BBJ32_RS05180	KV38_RS19765	BS641_RS21625	BEP52_RS19085	BJP78_RS19485	BJP74_RS18775	DFS55_RS05175	DBO90_RS18595	EX350_RS03240	FCV17_RS24145	FCV16_RS16680	FCV18_RS08185	JPH1_RS20990
MAV_RS08420	MAH_RS07670	BBJ32_RS00525	KV38_RS08170	BS641_RS14930	BEP52_RS08260	BJP78_RS08245	BJP74_RS07785	DFS55_RS16615	DBO90_RS12890	EX350_RS14470	FCV17_RS18845	FCV16_RS11385	FCV18_RS02875	JPH1_RS10000
MAV_RS07585	MAH_RS06860	BBJ32_RS01380	KV38_RS07210	BS641_RS15760	BEP52_RS07430	BJP78_RS07415	BJP74_RS06955	DFS55_RS17550	DBO90_RS13755	EX350_RS15305	FCV17_RS19675	FCV16_RS12215	FCV18_RS03705	JPH1_RS09175
MAV_RS04725	MAH_RS04145	BBJ32_RS13935	KV38_RS04345	BS641_RS05920	BEP52_RS04215	BJP78_RS04220	BJP74_RS04185	DFS55_RS20510	DBO90_RS16545	EX350_RS18225	FCV17_RS09595	FCV16_RS02130	FCV18_RS18355	JPH1_RS05950
MAV_RS20695	MAH_RS18280	BBJ32_RS05445	KV38_RS20040	BS641_RS21900	BEP52_RS19515	BJP78_RS19760	BJP74_RS19150	DFS55_RS04905	DBO90_RS18865	EX350_RS02950	FCV17_RS24415	FCV16_RS16950	FCV18_RS08455	JPH1_RS21270
MAV_RS17645	MAH_RS15195	BBJ32_RS15620	KV38_RS16320	BS641_RS18870	BEP52_RS16310	BJP78_RS16560	BJP74_RS16000	DFS55_RS08255	DBO90_RS10085	EX350_RS06015	FCV17_RS21360	FCV16_RS13900	FCV18_RS05395	JPH1_RS18255
MAV_RS25230	MAH_RS22455	BBJ32_RS09620	KV38_RS24305	BS641_RS26210	BEP52_RS23775	BJP78_RS24180	BJP74_RS23410	DFS55_RS00615	DBO90_RS23130	EX350_RS24245	FCV17_RS04575	FCV16_RS21290	FCV18_RS12780	JPH1_RS25600
MAV_RS04915	MAH_RS04335	BBJ32_RS14125	KV38_RS04535	BS641_RS06110	BEP52_RS04405	BJP78_RS04410	BJP74_RS04375	DFS55_RS20320	DBO90_RS16355	EX350_RS18035	FCV17_RS09785	FCV16_RS02320	FCV18_RS18545	JPH1_RS06140
MAV_RS17510	MAH_RS15060	BBJ32_RS15755	KV38_RS16180	BS641_RS18730	BEP52_RS16170	BJP78_RS16420	BJP74_RS15860	DFS55_RS08395	DBO90_RS09945	EX350_RS06155	FCV17_RS21220	FCV16_RS13760	FCV18_RS05255	JPH1_RS18115
MAV_RS01670	MAH_RS01535	BBJ32_RS10755	KV38_RS01465	BS641_RS01535	BEP52_RS01465	BJP78_RS01470	BJP74_RS01450	DFS55_RS23295	DBO90_RS04315	EX350_RS22210	FCV17_RS06440	FCV16_RS23160	FCV18_RS14645	JPH1_RS01480
MAV_RS24955	MAH_RS22185	BBJ32_RS09340	KV38_RS24025	BS641_RS25930	BEP52_RS23500	BJP78_RS23905	BJP74_RS23135	DFS55_RS00895	DBO90_RS22655	EX350_RS24525	FCV17_RS04260	FCV16_RS21000	FCV18_RS12490	JPH1_RS25320
MAV_RS00510	MAH_RS00625	BBJ32_RS11705	KV38_RS00525	BS641_RS00540	BEP52_RS00525	BJP78_RS00535	BJP74_RS00510	DFS55_RS24340	DBO90_RS00530	EX350_RS23250	FCV17_RS05475	FCV16_RS22190	FCV18_RS13680	JPH1_RS00535
MAV_RS22180	MAH_RS19785	BBJ32_RS06930	KV38_RS21585	BS641_RS23430	BEP52_RS21040	BJP78_RS21435	BJP74_RS20675	DFS55_RS03360	DBO90_RS20365	EX350_RS01350	FCV17_RS01755	FCV16_RS18495	FCV18_RS10000	JPH1_RS22800
MAV_RS15815	MAH_RS09855	BBJ32_RS17550	KV38_RS14520	BS641_RS16850	BEP52_RS10515	BJP78_RS10500	BJP74_RS10225	DFS55_RS10060	DBO90_RS05730	EX350_RS07890	FCV17_RS12735	FCV16_RS05280	FCV18_RS21600	JPH1_RS16340
MAV_RS04765	MAH_RS04185	BBJ32_RS13975	KV38_RS04385	BS641_RS05960	BEP52_RS04255	BJP78_RS04260	BJP74_RS04225	DFS55_RS20470	DBO90_RS16505	EX350_RS18185	FCV17_RS09635	FCV16_RS02170	FCV18_RS18395	JPH1_RS05990
MAV_RS10475	MAH_RS14175	BBJ32_RS19645	KV38_RS09420	BS641_RS13455	BEP52_RS15285	BJP78_RS15535	BJP74_RS10685	DFS55_RS15210	DBO90_RS11210	EX350_RS13135	FCV17_RS17610	FCV16_RS10150	FCV18_RS01640	JPH1_RS11320
MAV_RS10370	MAH_RS14280	BBJ32_RS19540	KV38_RS09315	BS641_RS13560	BEP52_RS15390	BJP78_RS15640	BJP74_RS10580	DFS55_RS15315	DBO90_RS11315	EX350_RS13240	FCV17_RS17715	FCV16_RS10255	FCV18_RS01745	JPH1_RS11215
MAV_RS15770	MAH_RS09900	BBJ32_RS17595	KV38_RS14475	BS641_RS16805	BEP52_RS10560	BJP78_RS10545	BJP74_RS10270	DFS55_RS10105	DBO90_RS05775	EX350_RS07935	FCV17_RS12780	FCV16_RS05325	FCV18_RS21645	JPH1_RS16295
MAV_RS23835	MAH_RS21440	BBJ32_RS08590	KV38_RS23295	BS641_RS25205	BEP52_RS22760	BJP78_RS23165	BJP74_RS22395	DFS55_RS01625	DBO90_RS22065	EX350_RS25250	FCV17_RS03540	FCV16_RS20280	FCV18_RS11770	JPH1_RS24595
MAV_RS06810	MAH_RS06295	BBJ32_RS01965	KV38_RS06550	BS641_RS08095	BEP52_RS06840	BJP78_RS06840	BJP74_RS06380	DFS55_RS18310	DBO90_RS14350	EX350_RS16015	FCV17_RS11760	FCV16_RS04300	FCV18_RS20620	JPH1_RS08170
MAV_RS14615	MAH_RS11000	BBJ32_RS22620	KV38_RS13290	BS641_RS08965	BEP52_RS11695	BJP78_RS11680	BJP74_RS14250	DFS55_RS11300	DBO90_RS06950	EX350_RS09080	FCV17_RS13950	FCV16_RS06490	FCV18_RS22800	JPH1_RS15160
MAV_RS06635	MAH_RS06120	BBJ32_RS02130	KV38_RS06375	BS641_RS07915	BEP52_RS06665	BJP78_RS06660	BJP74_RS06205	DFS55_RS18485	DBO90_RS14530	EX350_RS16190	FCV17_RS11585	FCV16_RS04125	FCV18_RS20445	JPH1_RS07995
MAV_RS05095	MAH_RS04515	BBJ32_RS03715	KV38_RS04720	BS641_RS06290	BEP52_RS05035	BJP78_RS05025	BJP74_RS04565	DFS55_RS20140	DBO90_RS16160	EX350_RS17850	FCV17_RS09970	FCV16_RS02505	FCV18_RS18730	JPH1_RS06325
MAV_RS05825	MAH_RS05330	BBJ32_RS02925	KV38_RS05555	BS641_RS07115	BEP52_RS05850	BJP78_RS05845	BJP74_RS05390	DFS55_RS19300	DBO90_RS15355	EX350_RS17015	FCV17_RS10720	FCV16_RS03260	FCV18_RS19570	JPH1_RS07170
MAV_RS05910	MAH_RS05415	BBJ32_RS02840	KV38_RS05640	BS641_RS07200	BEP52_RS05935	BJP78_RS05930	BJP74_RS05475	DFS55_RS19215	DBO90_RS15270	EX350_RS16930	FCV17_RS10805	FCV16_RS03345	FCV18_RS19655	JPH1_RS07255
MAV_RS10580	MAH_RS14070	BBJ32_RS19750	KV38_RS09525	BS641_RS13350	BEP52_RS15180	BJP78_RS15430	BJP74_RS10790	DFS55_RS15105	DBO90_RS11105	EX350_RS13030	FCV17_RS17505	FCV16_RS10045	FCV18_RS01535	JPH1_RS11425
MAV_RS10470	MAH_RS14180	BBJ32_RS19640	KV38_RS09415	BS641_RS13460	BEP52_RS15290	BJP78_RS15540	BJP74_RS10680	DFS55_RS15215	DBO90_RS11215	EX350_RS13140	FCV17_RS17615	FCV16_RS10155	FCV18_RS01645	JPH1_RS11315
MAV_RS17615	MAH_RS15165	BBJ32_RS15650	KV38_RS16290	BS641_RS18840	BEP52_RS16280	BJP78_RS16530	BJP74_RS15970	DFS55_RS08285	DBO90_RS10055	EX350_RS06045	FCV17_RS21330	FCV16_RS13870	FCV18_RS05365	JPH1_RS18225
MAV_RS07890	MAH_RS07165	BBJ32_RS01030	KV38_RS07545	BS641_RS15445	BEP52_RS07750	BJP78_RS07735	BJP74_RS07275	DFS55_RS17230	DBO90_RS13395	EX350_RS14990	FCV17_RS19360	FCV16_RS11900	FCV18_RS03390	JPH1_RS09490
MAV_RS02730	MAH_RS02435	BBJ32_RS12285	KV38_RS02510	BS641_RS02455	BEP52_RS02400	BJP78_RS02405	BJP74_RS02385	DFS55_RS22240	DBO90_RS00910	EX350_RS21260	FCV17_RS07365	FCV16_RS24085	FCV18_RS15570	JPH1_RS02415
MAV_RS22715	MAH_RS20325	BBJ32_RS07465	KV38_RS22155	BS641_RS24025	BEP52_RS21610	BJP78_RS22010	BJP74_RS21245	DFS55_RS02780	DBO90_RS20920	EX350_RS00780	FCV17_RS02350	FCV16_RS19090	FCV18_RS10590	JPH1_RS23390
MAV_RS22400	MAH_RS20010	BBJ32_RS07150	KV38_RS21830	BS641_RS23695	BEP52_RS21285	BJP78_RS21680	BJP74_RS20920	DFS55_RS03120	DBO90_RS20595	EX350_RS01110	FCV17_RS02000	FCV16_RS18740	FCV18_RS10245	JPH1_RS23040
MAV_RS11260	MAH_RS13540	BBJ32_RS20255	KV38_RS10285	BS641_RS12650	BEP52_RS14625	BJP78_RS14880	BJP74_RS11340	DFS55_RS14505	DBO90_RS10585	EX350_RS12365	FCV17_RS16975	FCV16_RS09515	FCV18_RS01005	JPH1_RS11950
MAV_RS22465	MAH_RS20075	BBJ32_RS07215	KV38_RS21905	BS641_RS23770	BEP52_RS21360	BJP78_RS21760	BJP74_RS20995	DFS55_RS03045	DBO90_RS20670	EX350_RS01035	FCV17_RS02075	FCV16_RS18815	FCV18_RS10320	JPH1_RS23115
MAV_RS00095	MAH_RS00220	BBJ32_RS09975	KV38_RS00100	BS641_RS00135	BEP52_RS00105	BJP78_RS00105	BJP74_RS00105	DFS55_RS00095	DBO90_RS00090	EX350_RS23680	FCV17_RS04970	FCV16_RS21685	FCV18_RS13175	JPH1_RS00130
MAV_RS04785	MAH_RS04205	BBJ32_RS13995	KV38_RS04405	BS641_RS05980	BEP52_RS04275	BJP78_RS04280	BJP74_RS04245	DFS55_RS20450	DBO90_RS16485	EX350_RS18165	FCV17_RS09655	FCV16_RS02190	FCV18_RS18415	JPH1_RS06010
MAV_RS00260	MAH_RS00370	BBJ32_RS11960	KV38_RS00265	BS641_RS00285	BEP52_RS00265	BJP78_RS00275	BJP74_RS00250	DFS55_RS00265	DBO90_RS00270	EX350_RS23510	FCV17_RS05230	FCV16_RS21945	FCV18_RS13440	JPH1_RS00285
MAV_RS24560	MAH_RS21750	BBJ32_RS08930	KV38_RS23615	BS641_RS25520	BEP52_RS23045	BJP78_RS23450	BJP74_RS22680	DFS55_RS01305	DBO90_RS22415	EX350_RS24935	FCV17_RS03855	FCV16_RS20595	FCV18_RS12085	JPH1_RS24915
MAV_RS21675	MAH_RS19260	BBJ32_RS06425	KV38_RS21050	BS641_RS22905	BEP52_RS20500	BJP78_RS20900	BJP74_RS20140	DFS55_RS03895	DBO90_RS19855	EX350_RS01900	FCV17_RS01245	FCV16_RS17985	FCV18_RS09490	JPH1_RS22290
MAV_RS13805	MAH_RS11785	BBJ32_RS21950	KV38_RS12000	BS641_RS10420	BEP52_RS12845	BJP78_RS12830	BJP74_RS13100	DFS55_RS12665	DBO90_RS07625	EX350_RS10440	FCV17_RS15160	FCV16_RS07700	FCV18_RS24035	JPH1_RS13750
MAV_RS25105	MAH_RS22335	BBJ32_RS09495	KV38_RS24180	BS641_RS26085	BEP52_RS23655	BJP78_RS24060	BJP74_RS23290	DFS55_RS00740	DBO90_RS23000	EX350_RS24370	FCV17_RS04415	FCV16_RS21155	FCV18_RS12645	JPH1_RS25475
MAV_RS24580	MAH_RS21770	BBJ32_RS08950	KV38_RS23635	BS641_RS25540	BEP52_RS23065	BJP78_RS23470	BJP74_RS22700	DFS55_RS01285	DBO90_RS22435	EX350_RS24915	FCV17_RS03875	FCV16_RS20615	FCV18_RS12105	JPH1_RS24935
MAV_RS17210	MAH_RS14735	BBJ32_RS16045	KV38_RS15880	BS641_RS18440	BEP52_RS15830	BJP78_RS16080	BJP74_RS15520	DFS55_RS08695	DBO90_RS09645	EX350_RS06450	FCV17_RS20930	FCV16_RS13470	FCV18_RS04965	JPH1_RS17820
MAV_RS16080	MAH_RS09595	BBJ32_RS17290	KV38_RS14785	BS641_RS17115	BEP52_RS10250	BJP78_RS10235	BJP74_RS09950	DFS55_RS09800	DBO90_RS05465	EX350_RS07630	FCV17_RS12480	FCV16_RS05020	FCV18_RS21340	JPH1_RS16600
MAV_RS23900	MAH_RS21505	BBJ32_RS08655	KV38_RS23360	BS641_RS25270	BEP52_RS22825	BJP78_RS23230	BJP74_RS22460	DFS55_RS01560	DBO90_RS22130	EX350_RS25185	FCV17_RS03605	FCV16_RS20345	FCV18_RS11835	JPH1_RS24660
MAV_RS13690	MAH_RS11900	BBJ32_RS21835	KV38_RS11885	BS641_RS10535	BEP52_RS12960	BJP78_RS12945	BJP74_RS12985	DFS55_RS12780	DBO90_RS07740	EX350_RS10555	FCV17_RS15275	FCV16_RS07815	FCV18_RS24155	JPH1_RS13635
MAV_RS04830	MAH_RS04250	BBJ32_RS14040	KV38_RS04450	BS641_RS06025	BEP52_RS04320	BJP78_RS04325	BJP74_RS04290	DFS55_RS20405	DBO90_RS16440	EX350_RS18120	FCV17_RS09700	FCV16_RS02235	FCV18_RS18460	JPH1_RS06055
MAV_RS17840	MAH_RS15385	BBJ32_RS15430	KV38_RS16510	BS641_RS19060	BEP52_RS16500	BJP78_RS16755	BJP74_RS16190	DFS55_RS08065	DBO90_RS10280	EX350_RS05820	FCV17_RS21560	FCV16_RS14100	FCV18_RS05595	JPH1_RS18450
MAV_RS15195	MAH_RS10440	BBJ32_RS18140	KV38_RS13860	BS641_RS08395	BEP52_RS11120	BJP78_RS11105	BJP74_RS14820	DFS55_RS10700	DBO90_RS06355	EX350_RS08475	FCV17_RS13350	FCV16_RS05890	FCV18_RS22200	JPH1_RS15765
MAV_RS22955	MAH_RS20565	BBJ32_RS07705	KV38_RS22400	BS641_RS24270	BEP52_RS21855	BJP78_RS22255	BJP74_RS21490	DFS55_RS02525	DBO90_RS21165	EX350_RS00530	FCV17_RS02595	FCV16_RS19335	FCV18_RS10835	JPH1_RS23635
MAV_RS10330	MAH_RS14335	BBJ32_RS19505	KV38_RS09275	BS641_RS13600	BEP52_RS15440	BJP78_RS15690	BJP74_RS10520	DFS55_RS15355	DBO90_RS11355	EX350_RS13300	FCV17_RS17755	FCV16_RS10295	FCV18_RS01785	JPH1_RS11175
MAV_RS11595	MAH_RS13235	BBJ32_RS20580	KV38_RS10655	BS641_RS12305	BEP52_RS14270	BJP78_RS14525	BJP74_RS11695	DFS55_RS14155	DBO90_RS09035	EX350_RS12010	FCV17_RS16625	FCV16_RS09165	FCV18_RS25505	JPH1_RS12305
MAV_RS15460	MAH_RS10185	BBJ32_RS17880	KV38_RS14130	BS641_RS16480	BEP52_RS10850	BJP78_RS10835	BJP74_RS15090	DFS55_RS10430	DBO90_RS06085	EX350_RS08205	FCV17_RS13060	FCV16_RS05600	FCV18_RS21910	JPH1_RS16030
MAV_RS12950	MAH_RS12625	BBJ32_RS21070	KV38_RS11170	BS641_RS11305	BEP52_RS13700	BJP78_RS13685	BJP74_RS12240	DFS55_RS13490	DBO90_RS08525	EX350_RS11310	FCV17_RS16045	FCV16_RS08585	FCV18_RS24925	JPH1_RS12875
MAV_RS08410	MAH_RS07660	BBJ32_RS00535	KV38_RS08160	BS641_RS14940	BEP52_RS08250	BJP78_RS08235	BJP74_RS07775	DFS55_RS16625	DBO90_RS12900	EX350_RS14480	FCV17_RS18855	FCV16_RS11395	FCV18_RS02885	JPH1_RS09990
MAV_RS23415	MAH_RS21020	BBJ32_RS08165	KV38_RS22865	BS641_RS24775	BEP52_RS22325	BJP78_RS22730	BJP74_RS21965	DFS55_RS02060	DBO90_RS21630	EX350_RS25685	FCV17_RS03105	FCV16_RS19845	FCV18_RS11335	JPH1_RS24160
MAV_RS15310	MAH_RS10335	BBJ32_RS18025	KV38_RS13975	BS641_RS16330	BEP52_RS11005	BJP78_RS10990	BJP74_RS14935	DFS55_RS10585	DBO90_RS06240	EX350_RS08355	FCV17_RS13235	FCV16_RS05775	FCV18_RS22085	JPH1_RS15880
MAV_RS04845	MAH_RS04265	BBJ32_RS14055	KV38_RS04465	BS641_RS06040	BEP52_RS04335	BJP78_RS04340	BJP74_RS04305	DFS55_RS20390	DBO90_RS16425	EX350_RS18105	FCV17_RS09715	FCV16_RS02250	FCV18_RS18475	JPH1_RS06070
MAV_RS10260	MAH_RS08685	BBJ32_RS19440	KV38_RS09205	BS641_RS13730	BEP52_RS09320	BJP78_RS09315	BJP74_RS08860	DFS55_RS15445	DBO90_RS11425	EX350_RS13370	FCV17_RS17835	FCV16_RS10375	FCV18_RS01865	JPH1_RS11075
MAV_RS19885	MAH_RS17475	BBJ32_RS04625	KV38_RS19210	BS641_RS21075	BEP52_RS18530	BJP78_RS18930	BJP74_RS18220	DFS55_RS05730	DBO90_RS18025	EX350_RS03795	FCV17_RS23550	FCV16_RS16095	FCV18_RS07595	JPH1_RS20435
MAV_RS19115	MAH_RS16720	BBJ32_RS14250	KV38_RS18330	BS641_RS20290	BEP52_RS17715	BJP78_RS18115	BJP74_RS17405	DFS55_RS06700	DBO90_RS02045	EX350_RS04560	FCV17_RS22790	FCV16_RS15325	FCV18_RS06825	JPH1_RS19670
MAV_RS07590	MAH_RS06865	BBJ32_RS01375	KV38_RS07215	BS641_RS15755	BEP52_RS07435	BJP78_RS07420	BJP74_RS06960	DFS55_RS17545	DBO90_RS13750	EX350_RS15300	FCV17_RS19670	FCV16_RS12210	FCV18_RS03700	JPH1_RS09180
MAV_RS08555	MAH_RS07805	BBJ32_RS00390	KV38_RS08310	BS641_RS14795	BEP52_RS08400	BJP78_RS08385	BJP74_RS07925	DFS55_RS16475	DBO90_RS12750	EX350_RS14330	FCV17_RS18705	FCV16_RS11245	FCV18_RS02735	JPH1_RS10140
MAV_RS19420	MAH_RS17020	BBJ32_RS04155	KV38_RS18640	BS641_RS20620	BEP52_RS18025	BJP78_RS18425	BJP74_RS17715	DFS55_RS06395	DBO90_RS01675	EX350_RS04250	FCV17_RS23110	FCV16_RS15645	FCV18_RS07145	JPH1_RS19980
MAV_RS15650	MAH_RS10010	BBJ32_RS17715	KV38_RS14350	BS641_RS16690	BEP52_RS10675	BJP78_RS10660	BJP74_RS10385	DFS55_RS10220	DBO90_RS05905	EX350_RS08050	FCV17_RS12895	FCV16_RS05440	FCV18_RS21760	JPH1_RS16180
MAV_RS02935	MAH_RS02640	BBJ32_RS12490	KV38_RS02715	BS641_RS02660	BEP52_RS02605	BJP78_RS02610	BJP74_RS02590	DFS55_RS22035	DBO90_RS01115	EX350_RS21055	FCV17_RS07570	FCV16_RS24290	FCV18_RS15775	JPH1_RS02620
MAV_RS19950	MAH_RS17540	BBJ32_RS04690	KV38_RS19275	BS641_RS21140	BEP52_RS18595	BJP78_RS18995	BJP74_RS18285	DFS55_RS05665	DBO90_RS18090	EX350_RS03730	FCV17_RS23615	FCV16_RS16160	FCV18_RS07660	JPH1_RS20500
MAV_RS17065	MAH_RS14605	BBJ32_RS16175	KV38_RS15750	BS641_RS18310	BEP52_RS15700	BJP78_RS15950	BJP74_RS15390	DFS55_RS08825	DBO90_RS09515	EX350_RS06585	FCV17_RS20800	FCV16_RS13340	FCV18_RS04835	JPH1_RS17685
MAV_RS04940	MAH_RS04360	BBJ32_RS14150	KV38_RS04560	BS641_RS06135	BEP52_RS04430	BJP78_RS04435	BJP74_RS04400	DFS55_RS20295	DBO90_RS16330	EX350_RS18010	FCV17_RS09810	FCV16_RS02345	FCV18_RS18570	JPH1_RS06165
MAV_RS18765	MAH_RS16375	BBJ32_RS14590	KV38_RS17535	BS641_RS19935	BEP52_RS17365	BJP78_RS17765	BJP74_RS17055	DFS55_RS07045	DBO90_RS02390	EX350_RS04915	FCV17_RS22430	FCV16_RS14965	FCV18_RS06465	JPH1_RS19315
MAV_RS21090	MAH_RS18675	BBJ32_RS05840	KV38_RS20440	BS641_RS22315	BEP52_RS19910	BJP78_RS20160	BJP74_RS19550	DFS55_RS04505	DBO90_RS19265	EX350_RS02510	FCV17_RS00635	FCV16_RS17375	FCV18_RS08880	JPH1_RS21700
MAV_RS25360	MAH_RS22585	BBJ32_RS09750	KV38_RS24435	BS641_RS26340	BEP52_RS23905	BJP78_RS24310	BJP74_RS23540	DFS55_RS00485	DBO90_RS23260	EX350_RS24115	FCV17_RS04705	FCV16_RS21420	FCV18_RS12910	JPH1_RS25730
MAV_RS23000	MAH_RS20610	BBJ32_RS07750	KV38_RS22445	BS641_RS24315	BEP52_RS21900	BJP78_RS22300	BJP74_RS21535	DFS55_RS02480	DBO90_RS21210	EX350_RS00485	FCV17_RS02640	FCV16_RS19380	FCV18_RS10880	JPH1_RS23680
MAV_RS06490	MAH_RS05970	BBJ32_RS02285	KV38_RS06220	BS641_RS07760	BEP52_RS06510	BJP78_RS06505	BJP74_RS06050	DFS55_RS18645	DBO90_RS14690	EX350_RS16350	FCV17_RS11430	FCV16_RS03970	FCV18_RS20290	JPH1_RS07840
MAV_RS20160	MAH_RS17750	BBJ32_RS04910	KV38_RS19495	BS641_RS21355	BEP52_RS18815	BJP78_RS19215	BJP74_RS18505	DFS55_RS05445	DBO90_RS18320	EX350_RS03510	FCV17_RS23840	FCV16_RS16380	FCV18_RS07880	JPH1_RS20720
MAV_RS22535	MAH_RS20145	BBJ32_RS07285	KV38_RS21975	BS641_RS23845	BEP52_RS21430	BJP78_RS21830	BJP74_RS21065	DFS55_RS02970	DBO90_RS20740	EX350_RS00960	FCV17_RS02145	FCV16_RS18885	FCV18_RS10390	JPH1_RS23185
MAV_RS10125	MAH_RS08555	BBJ32_RS19310	KV38_RS09075	BS641_RS13860	BEP52_RS09190	BJP78_RS09185	BJP74_RS08730	DFS55_RS15575	DBO90_RS11555	EX350_RS13500	FCV17_RS17965	FCV16_RS10505	FCV18_RS01995	JPH1_RS10945
MAV_RS02595	MAH_RS02300	BBJ32_RS12150	KV38_RS02370	BS641_RS02315	BEP52_RS02260	BJP78_RS02265	BJP74_RS02245	DFS55_RS22380	DBO90_RS00775	EX350_RS21400	FCV17_RS07225	FCV16_RS23945	FCV18_RS15430	JPH1_RS02275
MAV_RS15235	MAH_RS10400	BBJ32_RS18100	KV38_RS13900	BS641_RS16255	BEP52_RS11080	BJP78_RS11065	BJP74_RS14860	DFS55_RS10660	DBO90_RS06315	EX350_RS08435	FCV17_RS13310	FCV16_RS05850	FCV18_RS22160	JPH1_RS15805
MAV_RS04955	MAH_RS04375	BBJ32_RS14165	KV38_RS04575	BS641_RS06150	BEP52_RS04445	BJP78_RS04450	BJP74_RS04415	DFS55_RS20280	DBO90_RS16315	EX350_RS17995	FCV17_RS09825	FCV16_RS02360	FCV18_RS18585	JPH1_RS06180
MAV_RS19610	MAH_RS17220	BBJ32_RS04345	KV38_RS18830	BS641_RS20810	BEP52_RS18220	BJP78_RS18620	BJP74_RS17910	DFS55_RS06205	DBO90_RS17755	EX350_RS04060	FCV17_RS23300	FCV16_RS15835	FCV18_RS07335	JPH1_RS20170
MAV_RS08600	MAH_RS07845	BBJ32_RS00350	KV38_RS08355	BS641_RS14750	BEP52_RS08445	BJP78_RS08430	BJP74_RS07970	DFS55_RS16430	DBO90_RS12705	EX350_RS14255	FCV17_RS18660	FCV16_RS11200	FCV18_RS02690	JPH1_RS10190
MAV_RS19535	MAH_RS17145	BBJ32_RS04270	KV38_RS18755	BS641_RS20735	BEP52_RS18145	BJP78_RS18545	BJP74_RS17835	DFS55_RS06280	DBO90_RS17680	EX350_RS04135	FCV17_RS23225	FCV16_RS15760	FCV18_RS07260	JPH1_RS20095
MAV_RS22325	MAH_RS19935	BBJ32_RS07075	KV38_RS21750	BS641_RS23615	BEP52_RS21205	BJP78_RS21600	BJP74_RS20840	DFS55_RS03200	DBO90_RS20515	EX350_RS01190	FCV17_RS01920	FCV16_RS18660	FCV18_RS10165	JPH1_RS22960
MAV_RS08470	MAH_RS07720	BBJ32_RS00475	KV38_RS08220	BS641_RS14880	BEP52_RS08310	BJP78_RS08295	BJP74_RS07835	DFS55_RS16565	DBO90_RS12840	EX350_RS14420	FCV17_RS18795	FCV16_RS11335	FCV18_RS02825	JPH1_RS10050
MAV_RS04880	MAH_RS04300	BBJ32_RS14090	KV38_RS04500	BS641_RS06075	BEP52_RS04370	BJP78_RS04375	BJP74_RS04340	DFS55_RS20355	DBO90_RS16390	EX350_RS18070	FCV17_RS09750	FCV16_RS02285	FCV18_RS18510	JPH1_RS06105
MAV_RS11205	MAH_RS13595	BBJ32_RS20200	KV38_RS10225	BS641_RS12705	BEP52_RS14685	BJP78_RS14940	BJP74_RS11280	DFS55_RS14570	DBO90_RS10640	EX350_RS12420	FCV17_RS17035	FCV16_RS09575	FCV18_RS01065	JPH1_RS11895
MAV_RS23100	MAH_RS20710	BBJ32_RS07850	KV38_RS22545	BS641_RS24415	BEP52_RS22000	BJP78_RS22400	BJP74_RS21635	DFS55_RS02380	DBO90_RS21310	EX350_RS00365	FCV17_RS02740	FCV16_RS19480	FCV18_RS10980	JPH1_RS23800
MAV_RS01145	MAH_RS01230	BBJ32_RS11075	KV38_RS01135	BS641_RS01215	BEP52_RS01135	BJP78_RS01145	BJP74_RS01120	DFS55_RS23705	DBO90_RS04000	EX350_RS22640	FCV17_RS06085	FCV16_RS22805	FCV18_RS14290	JPH1_RS01145
MAV_RS05390	MAH_RS04845	BBJ32_RS03415	KV38_RS05065	BS641_RS06600	BEP52_RS05360	BJP78_RS05355	BJP74_RS04900	DFS55_RS19815	DBO90_RS15845	EX350_RS17505	FCV17_RS10325	FCV16_RS02865	FCV18_RS19080	JPH1_RS06645
MAV_RS09835	MAH_RS08275	BBJ32_RS19045	KV38_RS08800	BS641_RS14295	BEP52_RS08890	BJP78_RS08875	BJP74_RS08425	DFS55_RS16005	DBO90_RS11840	EX350_RS13785	FCV17_RS18240	FCV16_RS10780	FCV18_RS02270	JPH1_RS10655
MAV_RS10165	MAH_RS08595	BBJ32_RS19350	KV38_RS09115	BS641_RS13820	BEP52_RS09230	BJP78_RS09225	BJP74_RS08770	DFS55_RS15535	DBO90_RS11515	EX350_RS13460	FCV17_RS17925	FCV16_RS10465	FCV18_RS01955	JPH1_RS10985
MAV_RS13670	MAH_RS11920	BBJ32_RS21815	KV38_RS11865	BS641_RS10555	BEP52_RS12980	BJP78_RS12965	BJP74_RS12965	DFS55_RS12800	DBO90_RS07760	EX350_RS10575	FCV17_RS15295	FCV16_RS07835	FCV18_RS24175	JPH1_RS13615
MAV_RS23540	MAH_RS21145	BBJ32_RS08290	KV38_RS22990	BS641_RS24900	BEP52_RS22455	BJP78_RS22860	BJP74_RS22090	DFS55_RS01930	DBO90_RS21760	EX350_RS25555	FCV17_RS03235	FCV16_RS19975	FCV18_RS11465	JPH1_RS24290
MAV_RS16795	MAH_RS08890	BBJ32_RS16565	KV38_RS15490	BS641_RS18010	BEP52_RS09520	BJP78_RS09515	BJP74_RS09070	DFS55_RS09085	DBO90_RS03210	EX350_RS06880	FCV17_RS20505	FCV16_RS13045	FCV18_RS04540	JPH1_RS17395
MAV_RS00100	MAH_RS00225	BBJ32_RS09980	KV38_RS00105	BS641_RS00140	BEP52_RS00110	BJP78_RS00110	BJP74_RS00110	DFS55_RS00100	DBO90_RS00095	EX350_RS23675	FCV17_RS04975	FCV16_RS21690	FCV18_RS13180	JPH1_RS00135
MAV_RS13345	MAH_RS12235	BBJ32_RS21500	KV38_RS11540	BS641_RS10880	BEP52_RS13300	BJP78_RS13285	BJP74_RS12645	DFS55_RS13120	DBO90_RS08080	EX350_RS10890	FCV17_RS15615	FCV16_RS08155	FCV18_RS24495	JPH1_RS13295
MAV_RS22165	MAH_RS19770	BBJ32_RS06915	KV38_RS21570	BS641_RS23415	BEP52_RS21025	BJP78_RS21420	BJP74_RS20660	DFS55_RS03375	DBO90_RS20350	EX350_RS01365	FCV17_RS01740	FCV16_RS18480	FCV18_RS09985	JPH1_RS22785
MAV_RS08000	MAH_RS07275	BBJ32_RS00920	KV38_RS07765	BS641_RS15335	BEP52_RS07860	BJP78_RS07845	BJP74_RS07385	DFS55_RS17025	DBO90_RS13285	EX350_RS14880	FCV17_RS19250	FCV16_RS11790	FCV18_RS03280	JPH1_RS09600
MAV_RS16200	MAH_RS09490	BBJ32_RS17185	KV38_RS14890	BS641_RS17235	BEP52_RS10145	BJP78_RS10130	BJP74_RS09845	DFS55_RS09680	DBO90_RS05360	EX350_RS07525	FCV17_RS12375	FCV16_RS04915	FCV18_RS21235	JPH1_RS16720
MAV_RS21770	MAH_RS19355	BBJ32_RS06520	KV38_RS21145	BS641_RS23000	BEP52_RS20595	BJP78_RS20995	BJP74_RS20235	DFS55_RS03800	DBO90_RS19950	EX350_RS01805	FCV17_RS01340	FCV16_RS18080	FCV18_RS09585	JPH1_RS22385
MAV_RS15060	MAH_RS10570	BBJ32_RS18270	KV38_RS13725	BS641_RS08525	BEP52_RS11255	BJP78_RS11240	BJP74_RS14685	DFS55_RS10830	DBO90_RS06490	EX350_RS08610	FCV17_RS13485	FCV16_RS06025	FCV18_RS22335	JPH1_RS15630
MAV_RS00810	MAH_RS00895	BBJ32_RS11410	KV38_RS00795	BS641_RS00860	BEP52_RS00795	BJP78_RS00805	BJP74_RS00780	DFS55_RS24045	DBO90_RS03655	EX350_RS22980	FCV17_RS05745	FCV16_RS22465	FCV18_RS13950	JPH1_RS00805
MAV_RS20645	MAH_RS18230	BBJ32_RS05395	KV38_RS19990	BS641_RS21850	BEP52_RS19465	BJP78_RS19710	BJP74_RS19100	DFS55_RS04955	DBO90_RS18815	EX350_RS03000	FCV17_RS24365	FCV16_RS16900	FCV18_RS08405	JPH1_RS21220
MAV_RS22515	MAH_RS20125	BBJ32_RS07265	KV38_RS21955	BS641_RS23825	BEP52_RS21410	BJP78_RS21810	BJP74_RS21045	DFS55_RS02990	DBO90_RS20720	EX350_RS00980	FCV17_RS02125	FCV16_RS18865	FCV18_RS10370	JPH1_RS23165
MAV_RS14655	MAH_RS10960	BBJ32_RS22660	KV38_RS13330	BS641_RS08925	BEP52_RS11655	BJP78_RS11640	BJP74_RS14290	DFS55_RS11260	DBO90_RS06910	EX350_RS09040	FCV17_RS13910	FCV16_RS06450	FCV18_RS22760	JPH1_RS15200
MAV_RS20970	MAH_RS18555	BBJ32_RS05720	KV38_RS20315	BS641_RS22195	BEP52_RS19785	BJP78_RS20035	BJP74_RS19425	DFS55_RS04630	DBO90_RS19145	EX350_RS02635	FCV17_RS00510	FCV16_RS17250	FCV18_RS08755	JPH1_RS21575
MAV_RS16355	MAH_RS09335	BBJ32_RS17030	KV38_RS15045	BS641_RS17390	BEP52_RS09990	BJP78_RS09975	BJP74_RS09690	DFS55_RS09525	DBO90_RS05205	EX350_RS07370	FCV17_RS12220	FCV16_RS04760	FCV18_RS21080	JPH1_RS16875
MAV_RS14700	MAH_RS10915	BBJ32_RS22705	KV38_RS13375	BS641_RS08880	BEP52_RS11610	BJP78_RS11595	BJP74_RS14335	DFS55_RS11215	DBO90_RS06865	EX350_RS08995	FCV17_RS13865	FCV16_RS06405	FCV18_RS22715	JPH1_RS15245
MAV_RS03080	MAH_RS02785	BBJ32_RS12635	KV38_RS02860	BS641_RS02840	BEP52_RS02760	BJP78_RS02765	BJP74_RS02735	DFS55_RS21890	DBO90_RS01260	EX350_RS20910	FCV17_RS07715	FCV16_RS24435	FCV18_RS15920	JPH1_RS02765
MAV_RS08525	MAH_RS07775	BBJ32_RS00420	KV38_RS08275	BS641_RS14825	BEP52_RS08365	BJP78_RS08350	BJP74_RS07890	DFS55_RS16510	DBO90_RS12785	EX350_RS14365	FCV17_RS18740	FCV16_RS11280	FCV18_RS02770	JPH1_RS10105
MAV_RS02640	MAH_RS02345	BBJ32_RS12195	KV38_RS02420	BS641_RS02365	BEP52_RS02310	BJP78_RS02315	BJP74_RS02295	DFS55_RS22330	DBO90_RS00820	EX350_RS21350	FCV17_RS07275	FCV16_RS23995	FCV18_RS15480	JPH1_RS02325
MAV_RS00110	MAH_RS00235	BBJ32_RS09990	KV38_RS00115	BS641_RS00150	BEP52_RS00120	BJP78_RS00120	BJP74_RS00120	DFS55_RS00110	DBO90_RS00105	EX350_RS23665	FCV17_RS04985	FCV16_RS21700	FCV18_RS13190	JPH1_RS00145
MAV_RS07845	MAH_RS07120	BBJ32_RS01075	KV38_RS07490	BS641_RS15495	BEP52_RS07695	BJP78_RS07680	BJP74_RS07220	DFS55_RS17285	DBO90_RS13445	EX350_RS15040	FCV17_RS19410	FCV16_RS11950	FCV18_RS03440	JPH1_RS09440
MAV_RS24970	MAH_RS22200	BBJ32_RS09360	KV38_RS24040	BS641_RS25945	BEP52_RS23515	BJP78_RS23920	BJP74_RS23150	DFS55_RS00880	DBO90_RS22860	EX350_RS24510	FCV17_RS04275	FCV16_RS21015	FCV18_RS12505	JPH1_RS25335
MAV_RS18935	MAH_RS16545	BBJ32_RS14425	KV38_RS17715	BS641_RS20115	BEP52_RS17540	BJP78_RS17940	BJP74_RS17230	DFS55_RS06875	DBO90_RS02220	EX350_RS04735	FCV17_RS22615	FCV16_RS15150	FCV18_RS06650	JPH1_RS19495
MAV_RS25445	MAH_RS22675	BBJ32_RS09840	KV38_RS24535	BS641_RS26445	BEP52_RS24010	BJP78_RS24415	BJP74_RS23645	DFS55_RS24540	DBO90_RS23365	EX350_RS24015	FCV17_RS04800	FCV16_RS21515	FCV18_RS13005	JPH1_RS25825
MAV_RS03030	MAH_RS02735	BBJ32_RS12585	KV38_RS02810	BS641_RS02780	BEP52_RS02710	BJP78_RS02715	BJP74_RS02685	DFS55_RS21940	DBO90_RS01210	EX350_RS20960	FCV17_RS07665	FCV16_RS24385	FCV18_RS15870	JPH1_RS02715
MAV_RS11485	MAH_RS13330	BBJ32_RS20485	KV38_RS10495	BS641_RS12440	BEP52_RS14415	BJP78_RS14670	BJP74_RS11550	DFS55_RS14295	DBO90_RS09145	EX350_RS12155	FCV17_RS16765	FCV16_RS09305	FCV18_RS00795	JPH1_RS12160
MAV_RS04850	MAH_RS04270	BBJ32_RS14060	KV38_RS04470	BS641_RS06045	BEP52_RS04340	BJP78_RS04345	BJP74_RS04310	DFS55_RS20385	DBO90_RS16420	EX350_RS18100	FCV17_RS09720	FCV16_RS02255	FCV18_RS18480	JPH1_RS06075
MAV_RS23825	MAH_RS21430	BBJ32_RS08580	KV38_RS23285	BS641_RS25195	BEP52_RS22750	BJP78_RS23155	BJP74_RS22385	DFS55_RS01635	DBO90_RS22055	EX350_RS25260	FCV17_RS03530	FCV16_RS20270	FCV18_RS11760	JPH1_RS24585
MAV_RS04390	MAH_RS03755	BBJ32_RS13600	KV38_RS03955	BS641_RS05580	BEP52_RS03825	BJP78_RS03825	BJP74_RS03795	DFS55_RS20850	DBO90_RS16880	EX350_RS18565	FCV17_RS09255	FCV16_RS01790	FCV18_RS18015	JPH1_RS05600
MAV_RS01955	MAH_RS01830	BBJ32_RS10465	KV38_RS01885	BS641_RS01830	BEP52_RS01770	BJP78_RS01775	BJP74_RS01755	DFS55_RS22880	DBO90_RS04605	EX350_RS21900	FCV17_RS06735	FCV16_RS23455	FCV18_RS14940	JPH1_RS01775
MAV_RS25750	MAH_RS23710	BBJ32_RS22840	KV38_RS04755	BS641_RS26575	BEP52_RS05070	BJP78_RS05060	BJP74_RS04600	DFS55_RS20105	DBO90_RS16125	EX350_RS17815	FCV17_RS10005	FCV16_RS02540	FCV18_RS18765	JPH1_RS06360
MAV_RS18585	MAH_RS16190	BBJ32_RS14775	KV38_RS17345	BS641_RS19740	BEP52_RS17180	BJP78_RS17575	BJP74_RS16870	DFS55_RS07235	DBO90_RS02575	EX350_RS05105	FCV17_RS22240	FCV16_RS14775	FCV18_RS06275	JPH1_RS19125
MAV_RS00650	MAH_RS00735	BBJ32_RS11570	KV38_RS00635	BS641_RS00685	BEP52_RS00635	BJP78_RS00645	BJP74_RS00620	DFS55_RS24205	DBO90_RS00665	EX350_RS23140	FCV17_RS05585	FCV16_RS22300	FCV18_RS13790	JPH1_RS00645
MAV_RS01515	MAH_RS01385	BBJ32_RS10920	KV38_RS01300	BS641_RS01375	BEP52_RS01300	BJP78_RS01305	BJP74_RS01280	DFS55_RS23545	DBO90_RS04165	EX350_RS22475	FCV17_RS06250	FCV16_RS22970	FCV18_RS14455	JPH1_RS01315
MAV_RS15940	MAH_RS09730	BBJ32_RS17425	KV38_RS14645	BS641_RS16975	BEP52_RS10390	BJP78_RS10375	BJP74_RS10100	DFS55_RS09935	DBO90_RS05605	EX350_RS07765	FCV17_RS12610	FCV16_RS05155	FCV18_RS21475	JPH1_RS16465
MAV_RS05145	MAH_RS04565	BBJ32_RS03665	KV38_RS04770	BS641_RS06340	BEP52_RS05085	BJP78_RS05075	BJP74_RS04620	DFS55_RS20090	DBO90_RS16110	EX350_RS17800	FCV17_RS10025	FCV16_RS02560	FCV18_RS18780	JPH1_RS06375
MAV_RS05195	MAH_RS04615	BBJ32_RS03615	KV38_RS04820	BS641_RS06390	BEP52_RS05135	BJP78_RS05125	BJP74_RS04670	DFS55_RS20040	DBO90_RS16060	EX350_RS17750	FCV17_RS10075	FCV16_RS02610	FCV18_RS18830	JPH1_RS06425
MAV_RS04065	MAH_RS03425	BBJ32_RS13275	KV38_RS03630	BS641_RS05255	BEP52_RS03500	BJP78_RS03500	BJP74_RS03470	DFS55_RS21175	DBO90_RS17210	EX350_RS18895	FCV17_RS08930	FCV16_RS01465	FCV18_RS17690	JPH1_RS05270
MAV_RS03430	MAH_RS03070	BBJ32_RS12920	KV38_RS03155	BS641_RS03455	BEP52_RS03050	BJP78_RS03055	BJP74_RS03025	DFS55_RS21595	DBO90_RS01550	EX350_RS20620	FCV17_RS08010	FCV16_RS24730	FCV18_RS16215	JPH1_RS03055
MAV_RS10925	MAH_RS13905	BBJ32_RS19920	KV38_RS09695	BS641_RS13180	BEP52_RS15010	BJP78_RS15260	BJP74_RS10960	DFS55_RS14935	DBO90_RS10935	EX350_RS12860	FCV17_RS17335	FCV16_RS09875	FCV18_RS01365	JPH1_RS11595
MAV_RS23470	MAH_RS21075	BBJ32_RS08220	KV38_RS22920	BS641_RS24830	BEP52_RS22380	BJP78_RS22785	BJP74_RS22020	DFS55_RS02005	DBO90_RS21685	EX350_RS25630	FCV17_RS03160	FCV16_RS19900	FCV18_RS11390	JPH1_RS24215
MAV_RS05205	MAH_RS04625	BBJ32_RS03605	KV38_RS04830	BS641_RS06400	BEP52_RS05145	BJP78_RS05135	BJP74_RS04680	DFS55_RS20030	DBO90_RS16050	EX350_RS17740	FCV17_RS10085	FCV16_RS02620	FCV18_RS18840	JPH1_RS06435
MAV_RS18550	MAH_RS16155	BBJ32_RS14810	KV38_RS17310	BS641_RS19705	BEP52_RS17145	BJP78_RS17540	BJP74_RS16835	DFS55_RS07270	DBO90_RS02610	EX350_RS05140	FCV17_RS22205	FCV16_RS14740	FCV18_RS06240	JPH1_RS19090
MAV_RS13500	MAH_RS12090	BBJ32_RS21645	KV38_RS11690	BS641_RS10725	BEP52_RS13150	BJP78_RS13135	BJP74_RS12795	DFS55_RS12970	DBO90_RS07930	EX350_RS10740	FCV17_RS15465	FCV16_RS08005	FCV18_RS24345	JPH1_RS13445
MAV_RS15915	MAH_RS09755	BBJ32_RS17450	KV38_RS14620	BS641_RS16950	BEP52_RS10415	BJP78_RS10400	BJP74_RS10125	DFS55_RS09960	DBO90_RS05630	EX350_RS07790	FCV17_RS12635	FCV16_RS05180	FCV18_RS21500	JPH1_RS16440
MAV_RS06370	MAH_RS05845	BBJ32_RS02405	KV38_RS06100	BS641_RS07640	BEP52_RS06390	BJP78_RS06385	BJP74_RS05930	DFS55_RS18765	DBO90_RS14810	EX350_RS16470	FCV17_RS11310	FCV16_RS03850	FCV18_RS20170	JPH1_RS07720
MAV_RS03165	MAH_RS02870	BBJ32_RS12720	KV38_RS02945	BS641_RS03235	BEP52_RS02845	BJP78_RS02850	BJP74_RS02820	DFS55_RS21805	DBO90_RS01345	EX350_RS20825	FCV17_RS07805	FCV16_RS24525	FCV18_RS16010	JPH1_RS02850
MAV_RS05245	MAH_RS04665	BBJ32_RS03565	KV38_RS04870	BS641_RS06440	BEP52_RS05185	BJP78_RS05180	BJP74_RS04725	DFS55_RS19990	DBO90_RS16010	EX350_RS17700	FCV17_RS10125	FCV16_RS02660	FCV18_RS18880	JPH1_RS06475
MAV_RS20820	MAH_RS18400	BBJ32_RS05570	KV38_RS20165	BS641_RS22020	BEP52_RS19635	BJP78_RS19880	BJP74_RS19270	DFS55_RS04780	DBO90_RS18995	EX350_RS02825	FCV17_RS24540	FCV16_RS17075	FCV18_RS08580	JPH1_RS21395
MAV_RS20405	MAH_RS17995	BBJ32_RS05160	KV38_RS19745	BS641_RS21605	BEP52_RS19065	BJP78_RS19465	BJP74_RS18755	DFS55_RS05195	DBO90_RS18575	EX350_RS03260	FCV17_RS24125	FCV16_RS16660	FCV18_RS08165	JPH1_RS20970
MAV_RS08280	MAH_RS07530	BBJ32_RS00665	KV38_RS08030	BS641_RS15070	BEP52_RS08120	BJP78_RS08105	BJP74_RS07645	DFS55_RS16755	DBO90_RS13030	EX350_RS14610	FCV17_RS18985	FCV16_RS11525	FCV18_RS03015	JPH1_RS09860
MAV_RS18425	MAH_RS16030	BBJ32_RS14935	KV38_RS17185	BS641_RS19580	BEP52_RS17015	BJP78_RS17415	BJP74_RS16705	DFS55_RS07395	DBO90_RS02735	EX350_RS05275	FCV17_RS22080	FCV16_RS14615	FCV18_RS06115	JPH1_RS18965
MAV_RS05350	MAH_RS04805	BBJ32_RS03455	KV38_RS05025	BS641_RS06560	BEP52_RS05320	BJP78_RS05315	BJP74_RS04860	DFS55_RS19855	DBO90_RS15885	EX350_RS17545	FCV17_RS10285	FCV16_RS02825	FCV18_RS19040	JPH1_RS06605
MAV_RS25270	MAH_RS22495	BBJ32_RS09660	KV38_RS24345	BS641_RS26250	BEP52_RS23815	BJP78_RS24220	BJP74_RS23450	DFS55_RS00575	DBO90_RS23170	EX350_RS24205	FCV17_RS04615	FCV16_RS21330	FCV18_RS12820	JPH1_RS25640
MAV_RS18490	MAH_RS16095	BBJ32_RS14870	KV38_RS17250	BS641_RS19645	BEP52_RS17085	BJP78_RS17480	BJP74_RS16775	DFS55_RS07330	DBO90_RS02670	EX350_RS05200	FCV17_RS22145	FCV16_RS14680	FCV18_RS06180	JPH1_RS19030
MAV_RS24640	MAH_RS21830	BBJ32_RS09010	KV38_RS23695	BS641_RS25600	BEP52_RS23125	BJP78_RS23530	BJP74_RS22760	DFS55_RS01225	DBO90_RS22495	EX350_RS24855	FCV17_RS03935	FCV16_RS20675	FCV18_RS12165	JPH1_RS24995
MAV_RS02040	MAH_RS01915	BBJ32_RS10380	KV38_RS01970	BS641_RS01915	BEP52_RS01860	BJP78_RS01865	BJP74_RS01845	DFS55_RS22790	DBO90_RS04690	EX350_RS21810	FCV17_RS06825	FCV16_RS23545	FCV18_RS15030	JPH1_RS01865
MAV_RS03410	MAH_RS03050	BBJ32_RS12900	KV38_RS03135	BS641_RS03435	BEP52_RS03030	BJP78_RS03035	BJP74_RS03005	DFS55_RS21615	DBO90_RS01530	EX350_RS20640	FCV17_RS07990	FCV16_RS24710	FCV18_RS16195	JPH1_RS03035
MAV_RS07695	MAH_RS06970	BBJ32_RS01270	KV38_RS07320	BS641_RS15650	BEP52_RS07540	BJP78_RS07525	BJP74_RS07065	DFS55_RS17440	DBO90_RS13645	EX350_RS15195	FCV17_RS19565	FCV16_RS12105	FCV18_RS03595	JPH1_RS09285
MAV_RS18335	MAH_RS15940	BBJ32_RS15025	KV38_RS17095	BS641_RS19490	BEP52_RS16925	BJP78_RS17325	BJP74_RS16615	DFS55_RS07485	DBO90_RS02825	EX350_RS05370	FCV17_RS21990	FCV16_RS14525	FCV18_RS06025	JPH1_RS18875
MAV_RS07385	MAH_RS06640	BBJ32_RS01610	KV38_RS06970	BS641_RS15960	BEP52_RS07190	BJP78_RS07190	BJP74_RS06730	DFS55_RS17780	DBO90_RS13980	EX350_RS15510	FCV17_RS19875	FCV16_RS12415	FCV18_RS03910	JPH1_RS08970
MAV_RS09685	MAH_RS08120	BBJ32_RS18895	KV38_RS08640	BS641_RS14450	BEP52_RS08740	BJP78_RS08725	BJP74_RS08275	DFS55_RS16155	DBO90_RS11990	EX350_RS13935	FCV17_RS18390	FCV16_RS10930	FCV18_RS02420	JPH1_RS10505
MAV_RS21470	MAH_RS19055	BBJ32_RS06220	KV38_RS20825	BS641_RS22700	BEP52_RS20295	BJP78_RS20695	BJP74_RS19935	DFS55_RS04120	DBO90_RS19650	EX350_RS02125	FCV17_RS01020	FCV16_RS17760	FCV18_RS09265	JPH1_RS22085
MAV_RS18290	MAH_RS15895	BBJ32_RS15070	KV38_RS17050	BS641_RS19445	BEP52_RS16880	BJP78_RS17280	BJP74_RS16570	DFS55_RS07530	DBO90_RS02870	EX350_RS05415	FCV17_RS21945	FCV16_RS14480	FCV18_RS05980	JPH1_RS18830
MAV_RS20580	MAH_RS18170	BBJ32_RS05335	KV38_RS19925	BS641_RS21785	BEP52_RS19250	BJP78_RS19650	BJP74_RS18940	DFS55_RS05015	DBO90_RS18755	EX350_RS03080	FCV17_RS24305	FCV16_RS16840	FCV18_RS08345	JPH1_RS21150
MAV_RS23615	MAH_RS21220	BBJ32_RS08365	KV38_RS23070	BS641_RS24980	BEP52_RS22535	BJP78_RS22940	BJP74_RS22170	DFS55_RS01850	DBO90_RS21840	EX350_RS25475	FCV17_RS03315	FCV16_RS20055	FCV18_RS11545	JPH1_RS24370
MAV_RS15805	MAH_RS09865	BBJ32_RS17560	KV38_RS14510	BS641_RS16840	BEP52_RS10525	BJP78_RS10510	BJP74_RS10235	DFS55_RS10070	DBO90_RS05740	EX350_RS07900	FCV17_RS12745	FCV16_RS05290	FCV18_RS21610	JPH1_RS16330
MAV_RS05400	MAH_RS04855	BBJ32_RS03405	KV38_RS05075	BS641_RS06610	BEP52_RS05370	BJP78_RS05365	BJP74_RS04910	DFS55_RS19805	DBO90_RS15835	EX350_RS17495	FCV17_RS10335	FCV16_RS02875	FCV18_RS19090	JPH1_RS06655
MAV_RS17755	MAH_RS15305	BBJ32_RS15510	KV38_RS16430	BS641_RS18980	BEP52_RS16420	BJP78_RS16670	BJP74_RS16110	DFS55_RS08145	DBO90_RS10195	EX350_RS05900	FCV17_RS21475	FCV16_RS14015	FCV18_RS05510	JPH1_RS18365
MAV_RS08310	MAH_RS07560	BBJ32_RS00635	KV38_RS08060	BS641_RS15040	BEP52_RS08150	BJP78_RS08135	BJP74_RS07675	DFS55_RS16725	DBO90_RS13000	EX350_RS14580	FCV17_RS18955	FCV16_RS11495	FCV18_RS02985	JPH1_RS09890
MAV_RS04740	MAH_RS04160	BBJ32_RS13950	KV38_RS04360	BS641_RS05935	BEP52_RS04230	BJP78_RS04235	BJP74_RS04200	DFS55_RS20495	DBO90_RS16530	EX350_RS18210	FCV17_RS09610	FCV16_RS02145	FCV18_RS18370	JPH1_RS05965
MAV_RS06880	MAH_RS06365	BBJ32_RS01890	KV38_RS06620	BS641_RS08165	BEP52_RS06910	BJP78_RS06910	BJP74_RS06450	DFS55_RS18240	DBO90_RS14270	EX350_RS15945	FCV17_RS11830	FCV16_RS04370	FCV18_RS20690	JPH1_RS08240
MAV_RS11750	MAH_RS13100	BBJ32_RS20710	KV38_RS10795	BS641_RS12155	BEP52_RS14140	BJP78_RS14395	BJP74_RS11825	DFS55_RS14015	DBO90_RS08900	EX350_RS11860	FCV17_RS16465	FCV16_RS09005	FCV18_RS25345	JPH1_RS12455
MAV_RS04865	MAH_RS04285	BBJ32_RS14075	KV38_RS04485	BS641_RS06060	BEP52_RS04355	BJP78_RS04360	BJP74_RS04325	DFS55_RS20370	DBO90_RS16405	EX350_RS18085	FCV17_RS09735	FCV16_RS02270	FCV18_RS18495	JPH1_RS06090
MAV_RS23095	MAH_RS20705	BBJ32_RS07845	KV38_RS22540	BS641_RS24410	BEP52_RS21995	BJP78_RS22395	BJP74_RS21630	DFS55_RS02385	DBO90_RS21305	EX350_RS00370	FCV17_RS02735	FCV16_RS19475	FCV18_RS10975	JPH1_RS23795
MAV_RS18705	MAH_RS16315	BBJ32_RS14650	KV38_RS17475	BS641_RS19875	BEP52_RS17305	BJP78_RS17705	BJP74_RS16995	DFS55_RS07105	DBO90_RS02450	EX350_RS04975	FCV17_RS22370	FCV16_RS14905	FCV18_RS06405	JPH1_RS19255
MAV_RS06825	MAH_RS06310	BBJ32_RS01950	KV38_RS06565	BS641_RS08110	BEP52_RS06855	BJP78_RS06855	BJP74_RS06395	DFS55_RS18295	DBO90_RS14335	EX350_RS16000	FCV17_RS11775	FCV16_RS04315	FCV18_RS20635	JPH1_RS08185
MAV_RS11350	MAH_RS13465	BBJ32_RS20350	KV38_RS10360	BS641_RS12575	BEP52_RS14550	BJP78_RS14805	BJP74_RS11415	DFS55_RS14430	DBO90_RS09280	EX350_RS12290	FCV17_RS16900	FCV16_RS09440	FCV18_RS00930	JPH1_RS12025
MAV_RS05485	MAH_RS04990	BBJ32_RS03265	KV38_RS05210	BS641_RS06755	BEP52_RS05505	BJP78_RS05500	BJP74_RS05045	DFS55_RS19660	DBO90_RS15700	EX350_RS17360	FCV17_RS10375	FCV16_RS02915	FCV18_RS19225	JPH1_RS06790
MAV_RS14520	MAH_RS11095	BBJ32_RS22555	KV38_RS12715	BS641_RS09720	BEP52_RS12160	BJP78_RS12145	BJP74_RS13785	DFS55_RS11945	DBO90_RS07020	EX350_RS09775	FCV17_RS14415	FCV16_RS06955	FCV18_RS23555	JPH1_RS14460
MAV_RS16500	MAH_RS09185	BBJ32_RS16905	KV38_RS15190	BS641_RS17540	BEP52_RS09840	BJP78_RS09825	BJP74_RS09540	DFS55_RS09380	DBO90_RS05080	EX350_RS07175	FCV17_RS12075	FCV16_RS04615	FCV18_RS20935	JPH1_RS17085
MAV_RS01600	MAH_RS01460	BBJ32_RS10830	KV38_RS01390	BS641_RS01460	BEP52_RS01390	BJP78_RS01395	BJP74_RS01375	DFS55_RS23370	DBO90_RS04240	EX350_RS22285	FCV17_RS06365	FCV16_RS23085	FCV18_RS14570	JPH1_RS01405
MAV_RS20995	MAH_RS18580	BBJ32_RS05745	KV38_RS20340	BS641_RS22220	BEP52_RS19810	BJP78_RS20060	BJP74_RS19450	DFS55_RS04605	DBO90_RS19170	EX350_RS02610	FCV17_RS00535	FCV16_RS17275	FCV18_RS08780	JPH1_RS21600
MAV_RS19920	MAH_RS17510	BBJ32_RS04660	KV38_RS19245	BS641_RS21110	BEP52_RS18565	BJP78_RS18965	BJP74_RS18255	DFS55_RS05695	DBO90_RS18060	EX350_RS03760	FCV17_RS23585	FCV16_RS16130	FCV18_RS07630	JPH1_RS20470
MAV_RS23030	MAH_RS20640	BBJ32_RS07780	KV38_RS22475	BS641_RS24345	BEP52_RS21930	BJP78_RS22330	BJP74_RS21565	DFS55_RS02450	DBO90_RS21240	EX350_RS00435	FCV17_RS02670	FCV16_RS19410	FCV18_RS10910	JPH1_RS23730
MAV_RS10885	MAH_RS13945	BBJ32_RS19880	KV38_RS09655	BS641_RS13220	BEP52_RS15050	BJP78_RS15300	BJP74_RS10920	DFS55_RS14975	DBO90_RS10975	EX350_RS12900	FCV17_RS17375	FCV16_RS09915	FCV18_RS01405	JPH1_RS11555
MAV_RS25200	MAH_RS22425	BBJ32_RS09590	KV38_RS24275	BS641_RS26180	BEP52_RS23745	BJP78_RS24150	BJP74_RS23380	DFS55_RS00645	DBO90_RS23100	EX350_RS24275	FCV17_RS04545	FCV16_RS21260	FCV18_RS12750	JPH1_RS25570
MAV_RS15520	MAH_RS10145	BBJ32_RS17840	KV38_RS14170	BS641_RS16560	BEP52_RS10810	BJP78_RS10795	BJP74_RS15130	DFS55_RS10380	DBO90_RS06045	EX350_RS08165	FCV17_RS13005	FCV16_RS05550	FCV18_RS21870	JPH1_RS16070
MAV_RS22780	MAH_RS20390	BBJ32_RS07530	KV38_RS22220	BS641_RS24090	BEP52_RS21675	BJP78_RS22075	BJP74_RS21310	DFS55_RS02705	DBO90_RS20985	EX350_RS00715	FCV17_RS02415	FCV16_RS19155	FCV18_RS10655	JPH1_RS23455
MAV_RS05490	MAH_RS04995	BBJ32_RS03260	KV38_RS05215	BS641_RS06760	BEP52_RS05510	BJP78_RS05505	BJP74_RS05050	DFS55_RS19655	DBO90_RS15695	EX350_RS17355	FCV17_RS10380	FCV16_RS02920	FCV18_RS19230	JPH1_RS06795
MAV_RS23525	MAH_RS21130	BBJ32_RS08275	KV38_RS22975	BS641_RS24885	BEP52_RS22440	BJP78_RS22845	BJP74_RS22075	DFS55_RS01945	DBO90_RS21745	EX350_RS25570	FCV17_RS03220	FCV16_RS19960	FCV18_RS11450	JPH1_RS24275
MAV_RS00290	MAH_RS00400	BBJ32_RS11930	KV38_RS00295	BS641_RS00315	BEP52_RS00295	BJP78_RS00305	BJP74_RS00280	DFS55_RS00295	DBO90_RS00300	EX350_RS23480	FCV17_RS05260	FCV16_RS21975	FCV18_RS13470	JPH1_RS00315
MAV_RS22170	MAH_RS19775	BBJ32_RS06920	KV38_RS21575	BS641_RS23420	BEP52_RS21030	BJP78_RS21425	BJP74_RS20665	DFS55_RS03370	DBO90_RS20355	EX350_RS01360	FCV17_RS01745	FCV16_RS18485	FCV18_RS09990	JPH1_RS22790
MAV_RS24625	MAH_RS21815	BBJ32_RS08995	KV38_RS23680	BS641_RS25585	BEP52_RS23110	BJP78_RS23515	BJP74_RS22745	DFS55_RS01240	DBO90_RS22480	EX350_RS24870	FCV17_RS03920	FCV16_RS20660	FCV18_RS12150	JPH1_RS24980
MAV_RS03565	MAH_RS03205	BBJ32_RS13060	KV38_RS03290	BS641_RS03590	BEP52_RS03185	BJP78_RS03190	BJP74_RS03160	DFS55_RS21460	DBO90_RS17545	EX350_RS20485	FCV17_RS08145	FCV16_RS24865	FCV18_RS16350	JPH1_RS03190
MAV_RS13165	MAH_RS12405	BBJ32_RS21300	KV38_RS11395	BS641_RS11085	BEP52_RS13475	BJP78_RS13460	BJP74_RS12470	DFS55_RS13265	DBO90_RS08290	EX350_RS11085	FCV17_RS15795	FCV16_RS08335	FCV18_RS24675	JPH1_RS13100
MAV_RS08595	MAH_RS07840	BBJ32_RS00355	KV38_RS08350	BS641_RS14755	BEP52_RS08440	BJP78_RS08425	BJP74_RS07965	DFS55_RS16435	DBO90_RS12710	EX350_RS14260	FCV17_RS18665	FCV16_RS11205	FCV18_RS02695	JPH1_RS10185
MAV_RS21895	MAH_RS19480	BBJ32_RS06645	KV38_RS21270	BS641_RS23125	BEP52_RS20720	BJP78_RS21120	BJP74_RS20360	DFS55_RS03675	DBO90_RS20075	EX350_RS01680	FCV17_RS01465	FCV16_RS18205	FCV18_RS09710	JPH1_RS22510
MAV_RS11410	MAH_RS13405	BBJ32_RS20410	KV38_RS10420	BS641_RS12515	BEP52_RS14490	BJP78_RS14745	BJP74_RS11475	DFS55_RS14370	DBO90_RS09220	EX350_RS12230	FCV17_RS16840	FCV16_RS09380	FCV18_RS00870	JPH1_RS12085
MAV_RS00235	MAH_RS00345	BBJ32_RS11985	KV38_RS00240	BS641_RS00260	BEP52_RS00240	BJP78_RS00250	BJP74_RS00225	DFS55_RS00240	DBO90_RS00245	EX350_RS23535	FCV17_RS05205	FCV16_RS21920	FCV18_RS13415	JPH1_RS00260
MAV_RS05540	MAH_RS05045	BBJ32_RS03210	KV38_RS05270	BS641_RS06815	BEP52_RS05565	BJP78_RS05560	BJP74_RS05105	DFS55_RS19600	DBO90_RS15640	EX350_RS17300	FCV17_RS10435	FCV16_RS02975	FCV18_RS19285	JPH1_RS06850
MAV_RS08455	MAH_RS07705	BBJ32_RS00490	KV38_RS08205	BS641_RS14895	BEP52_RS08295	BJP78_RS08280	BJP74_RS07820	DFS55_RS16580	DBO90_RS12855	EX350_RS14435	FCV17_RS18810	FCV16_RS11350	FCV18_RS02840	JPH1_RS10035
MAV_RS21130	MAH_RS18715	BBJ32_RS05880	KV38_RS20485	BS641_RS22360	BEP52_RS19955	BJP78_RS20205	BJP74_RS19595	DFS55_RS04460	DBO90_RS19310	EX350_RS02465	FCV17_RS00680	FCV16_RS17420	FCV18_RS08925	JPH1_RS21745
MAV_RS05810	MAH_RS05315	BBJ32_RS02940	KV38_RS05540	BS641_RS07100	BEP52_RS05835	BJP78_RS05830	BJP74_RS05375	DFS55_RS19315	DBO90_RS15370	EX350_RS17030	FCV17_RS10705	FCV16_RS03245	FCV18_RS19555	JPH1_RS07155
MAV_RS22310	MAH_RS19920	BBJ32_RS07060	KV38_RS21735	BS641_RS23600	BEP52_RS21190	BJP78_RS21585	BJP74_RS20825	DFS55_RS03215	DBO90_RS20500	EX350_RS01205	FCV17_RS01905	FCV16_RS18645	FCV18_RS10150	JPH1_RS22945
MAV_RS07840	MAH_RS07115	BBJ32_RS01080	KV38_RS07485	BS641_RS15500	BEP52_RS07690	BJP78_RS07675	BJP74_RS07215	DFS55_RS17290	DBO90_RS13450	EX350_RS15045	FCV17_RS19415	FCV16_RS11955	FCV18_RS03445	JPH1_RS09435
MAV_RS10150	MAH_RS08580	BBJ32_RS19335	KV38_RS09100	BS641_RS13835	BEP52_RS09215	BJP78_RS09210	BJP74_RS08755	DFS55_RS15550	DBO90_RS11530	EX350_RS13475	FCV17_RS17940	FCV16_RS10480	FCV18_RS01970	JPH1_RS10970
MAV_RS00930	MAH_RS01015	BBJ32_RS11290	KV38_RS00915	BS641_RS00980	BEP52_RS00915	BJP78_RS00925	BJP74_RS00900	DFS55_RS23925	DBO90_RS03775	EX350_RS22860	FCV17_RS05865	FCV16_RS22585	FCV18_RS14070	JPH1_RS00925
MAV_RS23550	MAH_RS21155	BBJ32_RS08300	KV38_RS23005	BS641_RS24910	BEP52_RS22470	BJP78_RS22875	BJP74_RS22105	DFS55_RS01915	DBO90_RS21775	EX350_RS25540	FCV17_RS03250	FCV16_RS19990	FCV18_RS11480	JPH1_RS24305
MAV_RS04310	MAH_RS03675	BBJ32_RS13520	KV38_RS03875	BS641_RS05500	BEP52_RS03745	BJP78_RS03745	BJP74_RS03715	DFS55_RS20930	DBO90_RS16960	EX350_RS18645	FCV17_RS09175	FCV16_RS01710	FCV18_RS17935	JPH1_RS05520
MAV_RS02695	MAH_RS02400	BBJ32_RS12250	KV38_RS02475	BS641_RS02420	BEP52_RS02365	BJP78_RS02370	BJP74_RS02350	DFS55_RS22275	DBO90_RS00875	EX350_RS21295	FCV17_RS07330	FCV16_RS24050	FCV18_RS15535	JPH1_RS02380
MAV_RS05565	MAH_RS05070	BBJ32_RS03185	KV38_RS05295	BS641_RS06840	BEP52_RS05590	BJP78_RS05585	BJP74_RS05130	DFS55_RS19575	DBO90_RS15615	EX350_RS17275	FCV17_RS10460	FCV16_RS03000	FCV18_RS19310	JPH1_RS06875
MAV_RS23845	MAH_RS21450	BBJ32_RS08600	KV38_RS23305	BS641_RS25215	BEP52_RS22770	BJP78_RS23175	BJP74_RS22405	DFS55_RS01615	DBO90_RS22075	EX350_RS25240	FCV17_RS03550	FCV16_RS20290	FCV18_RS11780	JPH1_RS24605
MAV_RS21910	MAH_RS19495	BBJ32_RS06660	KV38_RS21285	BS641_RS23140	BEP52_RS20735	BJP78_RS21135	BJP74_RS20375	DFS55_RS03660	DBO90_RS20090	EX350_RS01665	FCV17_RS01480	FCV16_RS18220	FCV18_RS09725	JPH1_RS22525
MAV_RS03105	MAH_RS02810	BBJ32_RS12660	KV38_RS02885	BS641_RS02865	BEP52_RS02785	BJP78_RS02790	BJP74_RS02760	DFS55_RS21865	DBO90_RS01285	EX350_RS20885	FCV17_RS07740	FCV16_RS24460	FCV18_RS15945	JPH1_RS02790
MAV_RS05005	MAH_RS04430	BBJ32_RS03805	KV38_RS04635	BS641_RS06205	BEP52_RS04950	BJP78_RS04940	BJP74_RS04480	DFS55_RS20225	DBO90_RS16250	EX350_RS17935	FCV17_RS09885	FCV16_RS02420	FCV18_RS18645	JPH1_RS06240
MAV_RS04115	MAH_RS03470	BBJ32_RS13325	KV38_RS03680	BS641_RS05305	BEP52_RS03550	BJP78_RS03550	BJP74_RS03520	DFS55_RS21125	DBO90_RS17160	EX350_RS18845	FCV17_RS08980	FCV16_RS01515	FCV18_RS17740	JPH1_RS05325
MAV_RS02065	MAH_RS01940	BBJ32_RS10355	KV38_RS02000	BS641_RS01945	BEP52_RS01890	BJP78_RS01895	BJP74_RS01875	DFS55_RS22760	DBO90_RS04720	EX350_RS21780	FCV17_RS06855	FCV16_RS23575	FCV18_RS15060	JPH1_RS01895
MAV_RS02190	MAH_RS02065	BBJ32_RS10230	KV38_RS02130	BS641_RS02075	BEP52_RS02020	BJP78_RS02025	BJP74_RS02005	DFS55_RS22620	DBO90_RS04850	EX350_RS21640	FCV17_RS06985	FCV16_RS23705	FCV18_RS15190	JPH1_RS02035
MAV_RS22420	MAH_RS20030	BBJ32_RS07170	KV38_RS21855	BS641_RS23720	BEP52_RS21310	BJP78_RS21705	BJP74_RS20945	DFS55_RS03095	DBO90_RS20620	EX350_RS01085	FCV17_RS02025	FCV16_RS18765	FCV18_RS10270	JPH1_RS23065
MAV_RS18010	MAH_RS15555	BBJ32_RS15260	KV38_RS16695	BS641_RS19240	BEP52_RS16685	BJP78_RS16940	BJP74_RS16375	DFS55_RS07880	DBO90_RS03065	EX350_RS05635	FCV17_RS21745	FCV16_RS14285	FCV18_RS05780	JPH1_RS18630
MAV_RS21900	MAH_RS19485	BBJ32_RS06650	KV38_RS21275	BS641_RS23130	BEP52_RS20725	BJP78_RS21125	BJP74_RS20365	DFS55_RS03670	DBO90_RS20080	EX350_RS01675	FCV17_RS01470	FCV16_RS18210	FCV18_RS09715	JPH1_RS22515
MAV_RS05590	MAH_RS05095	BBJ32_RS03160	KV38_RS05320	BS641_RS06865	BEP52_RS05615	BJP78_RS05610	BJP74_RS05155	DFS55_RS19550	DBO90_RS15590	EX350_RS17250	FCV17_RS10485	FCV16_RS03025	FCV18_RS19335	JPH1_RS06895
MAV_RS21100	MAH_RS18685	BBJ32_RS05850	KV38_RS20450	BS641_RS22325	BEP52_RS19920	BJP78_RS20170	BJP74_RS19560	DFS55_RS04495	DBO90_RS19275	EX350_RS02500	FCV17_RS00645	FCV16_RS17385	FCV18_RS08890	JPH1_RS21710
MAV_RS05115	MAH_RS04535	BBJ32_RS03695	KV38_RS04740	BS641_RS06310	BEP52_RS05055	BJP78_RS05045	BJP74_RS04585	DFS55_RS20120	DBO90_RS16140	EX350_RS17830	FCV17_RS09990	FCV16_RS02525	FCV18_RS18750	JPH1_RS06345
MAV_RS15720	MAH_RS09950	BBJ32_RS17645	KV38_RS14425	BS641_RS16755	BEP52_RS10610	BJP78_RS10595	BJP74_RS10320	DFS55_RS10155	DBO90_RS05825	EX350_RS07985	FCV17_RS12830	FCV16_RS05375	FCV18_RS21695	JPH1_RS16245
MAV_RS10705	MAH_RS14030	BBJ32_RS19795	KV38_RS09570	BS641_RS13305	BEP52_RS15135	BJP78_RS15385	BJP74_RS10835	DFS55_RS15060	DBO90_RS11060	EX350_RS12985	FCV17_RS17460	FCV16_RS10000	FCV18_RS01490	JPH1_RS11470
MAV_RS21975	MAH_RS19580	BBJ32_RS06725	KV38_RS21375	BS641_RS23225	BEP52_RS20830	BJP78_RS21225	BJP74_RS20465	DFS55_RS03570	DBO90_RS20155	EX350_RS01560	FCV17_RS01545	FCV16_RS18285	FCV18_RS09790	JPH1_RS22590
MAV_RS15065	MAH_RS10565	BBJ32_RS18265	KV38_RS13730	BS641_RS08520	BEP52_RS11250	BJP78_RS11235	BJP74_RS14690	DFS55_RS10825	DBO90_RS06485	EX350_RS08605	FCV17_RS13480	FCV16_RS06020	FCV18_RS22330	JPH1_RS15635
MAV_RS15750	MAH_RS09920	BBJ32_RS17615	KV38_RS14455	BS641_RS16785	BEP52_RS10580	BJP78_RS10565	BJP74_RS10290	DFS55_RS10125	DBO90_RS05795	EX350_RS07955	FCV17_RS12800	FCV16_RS05345	FCV18_RS21665	JPH1_RS16275
MAV_RS24980	MAH_RS22210	BBJ32_RS09370	KV38_RS24050	BS641_RS25955	BEP52_RS23525	BJP78_RS23930	BJP74_RS23160	DFS55_RS00870	DBO90_RS22870	EX350_RS24500	FCV17_RS04285	FCV16_RS21025	FCV18_RS12515	JPH1_RS25345
MAV_RS19330	MAH_RS16930	BBJ32_RS04065	KV38_RS18550	BS641_RS20530	BEP52_RS17935	BJP78_RS18335	BJP74_RS17625	DFS55_RS06485	DBO90_RS01765	EX350_RS04340	FCV17_RS23010	FCV16_RS15545	FCV18_RS07045	JPH1_RS19890
MAV_RS07835	MAH_RS07110	BBJ32_RS01085	KV38_RS07480	BS641_RS15505	BEP52_RS07685	BJP78_RS07670	BJP74_RS07210	DFS55_RS17295	DBO90_RS13455	EX350_RS15050	FCV17_RS19420	FCV16_RS11960	FCV18_RS03450	JPH1_RS09430
MAV_RS06875	MAH_RS06360	BBJ32_RS01895	KV38_RS06615	BS641_RS08160	BEP52_RS06905	BJP78_RS06905	BJP74_RS06445	DFS55_RS18245	DBO90_RS14275	EX350_RS15950	FCV17_RS11825	FCV16_RS04365	FCV18_RS20685	JPH1_RS08235
MAV_RS06095	MAH_RS05570	BBJ32_RS02685	KV38_RS05805	BS641_RS07360	BEP52_RS06100	BJP78_RS06095	BJP74_RS05640	DFS55_RS19055	DBO90_RS15100	EX350_RS16765	FCV17_RS11015	FCV16_RS03555	FCV18_RS19865	JPH1_RS07425
MAV_RS19380	MAH_RS16980	BBJ32_RS04115	KV38_RS18600	BS641_RS20580	BEP52_RS17985	BJP78_RS18385	BJP74_RS17675	DFS55_RS06435	DBO90_RS01715	EX350_RS04290	FCV17_RS23060	FCV16_RS15595	FCV18_RS07095	JPH1_RS19940
MAV_RS07700	MAH_RS06975	BBJ32_RS01265	KV38_RS07325	BS641_RS15645	BEP52_RS07545	BJP78_RS07530	BJP74_RS07070	DFS55_RS17435	DBO90_RS13640	EX350_RS15190	FCV17_RS19560	FCV16_RS12100	FCV18_RS03590	JPH1_RS09290
MAV_RS13700	MAH_RS11890	BBJ32_RS21845	KV38_RS11895	BS641_RS10525	BEP52_RS12950	BJP78_RS12935	BJP74_RS12995	DFS55_RS12770	DBO90_RS07730	EX350_RS10545	FCV17_RS15265	FCV16_RS07805	FCV18_RS24145	JPH1_RS13645
MAV_RS16305	MAH_RS09385	BBJ32_RS17080	KV38_RS14995	BS641_RS17340	BEP52_RS10040	BJP78_RS10025	BJP74_RS09740	DFS55_RS09575	DBO90_RS05255	EX350_RS07420	FCV17_RS12270	FCV16_RS04810	FCV18_RS21130	JPH1_RS16825
MAV_RS09715	MAH_RS08150	BBJ32_RS18925	KV38_RS08670	BS641_RS14420	BEP52_RS08770	BJP78_RS08755	BJP74_RS08305	DFS55_RS16125	DBO90_RS11960	EX350_RS13905	FCV17_RS18360	FCV16_RS10900	FCV18_RS02390	JPH1_RS10535
MAV_RS08380	MAH_RS07630	BBJ32_RS00565	KV38_RS08130	BS641_RS14970	BEP52_RS08220	BJP78_RS08205	BJP74_RS07745	DFS55_RS16655	DBO90_RS12930	EX350_RS14510	FCV17_RS18885	FCV16_RS11425	FCV18_RS02915	JPH1_RS09960
MAV_RS00035	MAH_RS00030	BBJ32_RS09915	KV38_RS00035	BS641_RS00030	BEP52_RS00030	BJP78_RS00030	BJP74_RS00030	DFS55_RS00030	DBO90_RS00030	EX350_RS23935	FCV17_RS04880	FCV16_RS21595	FCV18_RS13085	JPH1_RS00030
MAV_RS07785	MAH_RS07060	BBJ32_RS01135	KV38_RS07430	BS641_RS15555	BEP52_RS07635	BJP78_RS07620	BJP74_RS07160	DFS55_RS17345	DBO90_RS13505	EX350_RS15100	FCV17_RS19470	FCV16_RS12010	FCV18_RS03500	JPH1_RS09380
MAV_RS02125	MAH_RS02000	BBJ32_RS10295	KV38_RS02060	BS641_RS02005	BEP52_RS01950	BJP78_RS01955	BJP74_RS01935	DFS55_RS22700	DBO90_RS04780	EX350_RS21720	FCV17_RS06915	FCV16_RS23635	FCV18_RS15120	JPH1_RS01955
MAV_RS05080	MAH_RS04500	BBJ32_RS03730	KV38_RS04705	BS641_RS06275	BEP52_RS05020	BJP78_RS05010	BJP74_RS04550	DFS55_RS20155	DBO90_RS16175	EX350_RS17865	FCV17_RS09955	FCV16_RS02490	FCV18_RS18715	JPH1_RS06310
MAV_RS06720	MAH_RS06205	BBJ32_RS02045	KV38_RS06460	BS641_RS08000	BEP52_RS06750	BJP78_RS06745	BJP74_RS06290	DFS55_RS18400	DBO90_RS14445	EX350_RS16105	FCV17_RS11670	FCV16_RS04210	FCV18_RS20530	JPH1_RS08080
MAV_RS20145	MAH_RS17735	BBJ32_RS04895	KV38_RS19480	BS641_RS21340	BEP52_RS18800	BJP78_RS19200	BJP74_RS18490	DFS55_RS05460	DBO90_RS18305	EX350_RS03525	FCV17_RS23825	FCV16_RS16365	FCV18_RS07865	JPH1_RS20705
MAV_RS11070	MAH_RS13750	BBJ32_RS20065	KV38_RS09860	BS641_RS13000	BEP52_RS14855	BJP78_RS15105	BJP74_RS11115	DFS55_RS14780	DBO90_RS10780	EX350_RS12700	FCV17_RS17175	FCV16_RS09715	FCV18_RS01205	JPH1_RS11755
MAV_RS20470	MAH_RS18060	BBJ32_RS05225	KV38_RS19810	BS641_RS21670	BEP52_RS19130	BJP78_RS19530	BJP74_RS18820	DFS55_RS05130	DBO90_RS18640	EX350_RS03195	FCV17_RS24190	FCV16_RS16725	FCV18_RS08230	JPH1_RS21035
MAV_RS15825	MAH_RS09845	BBJ32_RS17540	KV38_RS14530	BS641_RS16860	BEP52_RS10505	BJP78_RS10490	BJP74_RS10215	DFS55_RS10050	DBO90_RS05720	EX350_RS07880	FCV17_RS12725	FCV16_RS05270	FCV18_RS21590	JPH1_RS16350
MAV_RS02985	MAH_RS02690	BBJ32_RS12540	KV38_RS02765	BS641_RS02710	BEP52_RS02655	BJP78_RS02660	BJP74_RS02640	DFS55_RS21985	DBO90_RS01165	EX350_RS21005	FCV17_RS07620	FCV16_RS24340	FCV18_RS15825	JPH1_RS02670
MAV_RS25840	MAH_RS23760	BBJ32_RS22795	KV38_RS06795	BS641_RS16145	BEP52_RS07030	BJP78_RS07030	BJP74_RS06570	DFS55_RS17965	DBO90_RS14140	EX350_RS15685	FCV17_RS20035	FCV16_RS12575	FCV18_RS04070	JPH1_RS08810
MAV_RS23505	MAH_RS21110	BBJ32_RS08255	KV38_RS22955	BS641_RS24865	BEP52_RS22415	BJP78_RS22820	BJP74_RS22055	DFS55_RS01970	DBO90_RS21720	EX350_RS25595	FCV17_RS03195	FCV16_RS19935	FCV18_RS11425	JPH1_RS24250
MAV_RS05525	MAH_RS05030	BBJ32_RS03225	KV38_RS05255	BS641_RS06800	BEP52_RS05550	BJP78_RS05545	BJP74_RS05090	DFS55_RS19615	DBO90_RS15655	EX350_RS17315	FCV17_RS10420	FCV16_RS02960	FCV18_RS19270	JPH1_RS06835
MAV_RS21455	MAH_RS19040	BBJ32_RS06205	KV38_RS20810	BS641_RS22685	BEP52_RS20280	BJP78_RS20680	BJP74_RS19920	DFS55_RS04135	DBO90_RS19635	EX350_RS02140	FCV17_RS01005	FCV16_RS17745	FCV18_RS09250	JPH1_RS22070
MAV_RS22690	MAH_RS20300	BBJ32_RS07440	KV38_RS22130	BS641_RS24000	BEP52_RS21585	BJP78_RS21985	BJP74_RS21220	DFS55_RS02805	DBO90_RS20895	EX350_RS00805	FCV17_RS02325	FCV16_RS19065	FCV18_RS10565	JPH1_RS23365
MAV_RS08180	MAH_RS07430	BBJ32_RS00765	KV38_RS07930	BS641_RS15170	BEP52_RS08020	BJP78_RS08005	BJP74_RS07545	DFS55_RS16860	DBO90_RS13130	EX350_RS14710	FCV17_RS19085	FCV16_RS11625	FCV18_RS03115	JPH1_RS09765
MAV_RS01000	MAH_RS01085	BBJ32_RS11220	KV38_RS00990	BS641_RS01055	BEP52_RS00985	BJP78_RS00995	BJP74_RS00970	DFS55_RS23855	DBO90_RS03850	EX350_RS22790	FCV17_RS05935	FCV16_RS22655	FCV18_RS14140	JPH1_RS00995
MAV_RS07520	MAH_RS06775	BBJ32_RS01445	KV38_RS07145	BS641_RS15825	BEP52_RS07360	BJP78_RS07330	BJP74_RS06870	DFS55_RS17615	DBO90_RS13845	EX350_RS15370	FCV17_RS19740	FCV16_RS12280	FCV18_RS03770	JPH1_RS09110
MAV_RS17670	MAH_RS15220	BBJ32_RS15595	KV38_RS16345	BS641_RS18895	BEP52_RS16335	BJP78_RS16585	BJP74_RS16025	DFS55_RS08230	DBO90_RS10110	EX350_RS05990	FCV17_RS21385	FCV16_RS13925	FCV18_RS05420	JPH1_RS18280
MAV_RS09760	MAH_RS08195	BBJ32_RS18970	KV38_RS08725	BS641_RS14375	BEP52_RS08815	BJP78_RS08800	BJP74_RS08350	DFS55_RS16080	DBO90_RS11915	EX350_RS13860	FCV17_RS18315	FCV16_RS10855	FCV18_RS02345	JPH1_RS10580
MAV_RS19775	MAH_RS17385	BBJ32_RS04510	KV38_RS19000	BS641_RS20975	BEP52_RS18390	BJP78_RS18790	BJP74_RS18080	DFS55_RS06035	DBO90_RS17920	EX350_RS03890	FCV17_RS23465	FCV16_RS16000	FCV18_RS07500	JPH1_RS20340
MAV_RS20680	MAH_RS18265	BBJ32_RS05430	KV38_RS20025	BS641_RS21885	BEP52_RS19500	BJP78_RS19745	BJP74_RS19135	DFS55_RS04920	DBO90_RS18850	EX350_RS02965	FCV17_RS24400	FCV16_RS16935	FCV18_RS08440	JPH1_RS21255
MAV_RS14405	MAH_RS11205	BBJ32_RS22410	KV38_RS12615	BS641_RS09815	BEP52_RS12270	BJP78_RS12255	BJP74_RS13675	DFS55_RS12040	DBO90_RS07165	EX350_RS09870	FCV17_RS14515	FCV16_RS07055	FCV18_RS23655	JPH1_RS14365
MAV_RS14860	MAH_RS10785	BBJ32_RS00070	KV38_RS13505	BS641_RS08750	BEP52_RS11480	BJP78_RS11465	BJP74_RS14460	DFS55_RS11055	DBO90_RS06725	EX350_RS08835	FCV17_RS13705	FCV16_RS06245	FCV18_RS22555	JPH1_RS15405
MAV_RS21405	MAH_RS18990	BBJ32_RS06155	KV38_RS20760	BS641_RS22635	BEP52_RS20230	BJP78_RS20630	BJP74_RS19870	DFS55_RS04185	DBO90_RS19585	EX350_RS02190	FCV17_RS00955	FCV16_RS17695	FCV18_RS09200	JPH1_RS22020
MAV_RS20465	MAH_RS18055	BBJ32_RS05220	KV38_RS19805	BS641_RS21665	BEP52_RS19125	BJP78_RS19525	BJP74_RS18815	DFS55_RS05135	DBO90_RS18635	EX350_RS03200	FCV17_RS24185	FCV16_RS16720	FCV18_RS08225	JPH1_RS21030
MAV_RS00540	MAH_RS00655	BBJ32_RS11675	KV38_RS00555	BS641_RS00570	BEP52_RS00555	BJP78_RS00565	BJP74_RS00540	DFS55_RS24310	DBO90_RS00560	EX350_RS23220	FCV17_RS05505	FCV16_RS22220	FCV18_RS13710	JPH1_RS00565
MAV_RS02655	MAH_RS02360	BBJ32_RS12210	KV38_RS02435	BS641_RS02380	BEP52_RS02325	BJP78_RS02330	BJP74_RS02310	DFS55_RS22315	DBO90_RS00835	EX350_RS21335	FCV17_RS07290	FCV16_RS24010	FCV18_RS15495	JPH1_RS02340
MAV_RS24575	MAH_RS21765	BBJ32_RS08945	KV38_RS23630	BS641_RS25535	BEP52_RS23060	BJP78_RS23465	BJP74_RS22695	DFS55_RS01290	DBO90_RS22430	EX350_RS24920	FCV17_RS03870	FCV16_RS20610	FCV18_RS12100	JPH1_RS24930
MAV_RS21805	MAH_RS19390	BBJ32_RS06555	KV38_RS21180	BS641_RS23035	BEP52_RS20630	BJP78_RS21030	BJP74_RS20270	DFS55_RS03765	DBO90_RS19985	EX350_RS01770	FCV17_RS01375	FCV16_RS18115	FCV18_RS09620	JPH1_RS22420
MAV_RS10085	MAH_RS08515	BBJ32_RS19270	KV38_RS09035	BS641_RS13900	BEP52_RS09150	BJP78_RS09145	BJP74_RS08690	DFS55_RS15615	DBO90_RS11595	EX350_RS13540	FCV17_RS18005	FCV16_RS10545	FCV18_RS02035	JPH1_RS10905
MAV_RS05735	MAH_RS05240	BBJ32_RS03015	KV38_RS05465	BS641_RS07025	BEP52_RS05760	BJP78_RS05755	BJP74_RS05300	DFS55_RS19390	DBO90_RS15445	EX350_RS17105	FCV17_RS10630	FCV16_RS03170	FCV18_RS19480	JPH1_RS07080
MAV_RS16720	MAH_RS08965	BBJ32_RS16640	KV38_RS15415	BS641_RS17935	BEP52_RS09595	BJP78_RS09590	BJP74_RS09145	DFS55_RS09160	DBO90_RS03285	EX350_RS06955	FCV17_RS20430	FCV16_RS12970	FCV18_RS04465	JPH1_RS17320
MAV_RS11920	MAH_RS12945	BBJ32_RS20865	KV38_RS10950	BS641_RS12000	BEP52_RS13985	BJP78_RS14240	BJP74_RS11980	DFS55_RS13860	DBO90_RS08745	EX350_RS11705	FCV17_RS16310	FCV16_RS08850	FCV18_RS25190	JPH1_RS12610
MAV_RS02670	MAH_RS02375	BBJ32_RS12225	KV38_RS02450	BS641_RS02395	BEP52_RS02340	BJP78_RS02345	BJP74_RS02325	DFS55_RS22300	DBO90_RS00850	EX350_RS21320	FCV17_RS07305	FCV16_RS24025	FCV18_RS15510	JPH1_RS02355
MAV_RS19105	MAH_RS16710	BBJ32_RS14260	KV38_RS18320	BS641_RS20280	BEP52_RS17705	BJP78_RS18105	BJP74_RS17395	DFS55_RS06710	DBO90_RS02055	EX350_RS04570	FCV17_RS22780	FCV16_RS15315	FCV18_RS06815	JPH1_RS19660
MAV_RS20810	MAH_RS18390	BBJ32_RS05560	KV38_RS20155	BS641_RS22010	BEP52_RS19625	BJP78_RS19870	BJP74_RS19260	DFS55_RS04790	DBO90_RS18985	EX350_RS02835	FCV17_RS24530	FCV16_RS17065	FCV18_RS08570	JPH1_RS21385
MAV_RS08305	MAH_RS07555	BBJ32_RS00640	KV38_RS08055	BS641_RS15045	BEP52_RS08145	BJP78_RS08130	BJP74_RS07670	DFS55_RS16730	DBO90_RS13005	EX350_RS14585	FCV17_RS18960	FCV16_RS11500	FCV18_RS02990	JPH1_RS09885
MAV_RS23040	MAH_RS20650	BBJ32_RS07790	KV38_RS22485	BS641_RS24355	BEP52_RS21940	BJP78_RS22340	BJP74_RS21575	DFS55_RS02440	DBO90_RS21250	EX350_RS00425	FCV17_RS02680	FCV16_RS19420	FCV18_RS10920	JPH1_RS23740
MAV_RS14650	MAH_RS10965	BBJ32_RS22655	KV38_RS13325	BS641_RS08930	BEP52_RS11660	BJP78_RS11645	BJP74_RS14285	DFS55_RS11265	DBO90_RS06915	EX350_RS09045	FCV17_RS13915	FCV16_RS06455	FCV18_RS22765	JPH1_RS15195
MAV_RS14030	MAH_RS11560	BBJ32_RS22160	KV38_RS12230	BS641_RS10200	BEP52_RS12625	BJP78_RS12610	BJP74_RS13320	DFS55_RS12430	DBO90_RS07415	EX350_RS10230	FCV17_RS14915	FCV16_RS07455	FCV18_RS23790	JPH1_RS13995
MAV_RS18115	MAH_RS15660	BBJ32_RS15155	KV38_RS16800	BS641_RS19345	BEP52_RS16790	BJP78_RS17045	BJP74_RS16480	DFS55_RS07775	DBO90_RS02960	EX350_RS05525	FCV17_RS21850	FCV16_RS14385	FCV18_RS05885	JPH1_RS18735
MAV_RS05740	MAH_RS05245	BBJ32_RS03010	KV38_RS05470	BS641_RS07030	BEP52_RS05765	BJP78_RS05760	BJP74_RS05305	DFS55_RS19385	DBO90_RS15440	EX350_RS17100	FCV17_RS10635	FCV16_RS03175	FCV18_RS19485	JPH1_RS07085
MAV_RS16380	MAH_RS09310	BBJ32_RS17005	KV38_RS15070	BS641_RS17415	BEP52_RS09965	BJP78_RS09950	BJP74_RS09665	DFS55_RS09500	DBO90_RS05180	EX350_RS07345	FCV17_RS12195	FCV16_RS04735	FCV18_RS21055	JPH1_RS16900
MAV_RS08165	MAH_RS07415	BBJ32_RS00780	KV38_RS07910	BS641_RS15190	BEP52_RS08005	BJP78_RS07990	BJP74_RS07530	DFS55_RS16880	DBO90_RS13145	EX350_RS14730	FCV17_RS19105	FCV16_RS11645	FCV18_RS03135	JPH1_RS09745
MAV_RS20935	MAH_RS18520	BBJ32_RS05685	KV38_RS20280	BS641_RS22160	BEP52_RS19750	BJP78_RS20000	BJP74_RS19390	DFS55_RS04665	DBO90_RS19110	EX350_RS02670	FCV17_RS00475	FCV16_RS17215	FCV18_RS08720	JPH1_RS21540
MAV_RS04675	MAH_RS04095	BBJ32_RS13885	KV38_RS04295	BS641_RS05870	BEP52_RS04165	BJP78_RS04170	BJP74_RS04135	DFS55_RS20560	DBO90_RS16595	EX350_RS18275	FCV17_RS09545	FCV16_RS02080	FCV18_RS18305	JPH1_RS05890
MAV_RS06865	MAH_RS06350	BBJ32_RS01905	KV38_RS06605	BS641_RS08150	BEP52_RS06895	BJP78_RS06895	BJP74_RS06435	DFS55_RS18255	DBO90_RS14285	EX350_RS15960	FCV17_RS11815	FCV16_RS04355	FCV18_RS20675	JPH1_RS08225
MAV_RS15260	MAH_RS10375	BBJ32_RS18075	KV38_RS13925	BS641_RS16280	BEP52_RS11055	BJP78_RS11040	BJP74_RS14885	DFS55_RS10635	DBO90_RS06290	EX350_RS08405	FCV17_RS13285	FCV16_RS05825	FCV18_RS22135	JPH1_RS15830
MAV_RS18815	MAH_RS16425	BBJ32_RS14540	KV38_RS17590	BS641_RS19990	BEP52_RS17420	BJP78_RS17820	BJP74_RS17110	DFS55_RS06990	DBO90_RS02335	EX350_RS04860	FCV17_RS22485	FCV16_RS15020	FCV18_RS06520	JPH1_RS19370
MAV_RS15040	MAH_RS10590	BBJ32_RS18290	KV38_RS13705	BS641_RS08545	BEP52_RS11275	BJP78_RS11260	BJP74_RS14665	DFS55_RS10850	DBO90_RS06510	EX350_RS08630	FCV17_RS13505	FCV16_RS06045	FCV18_RS22355	JPH1_RS15610
MAV_RS17560	MAH_RS15110	BBJ32_RS15705	KV38_RS16230	BS641_RS18780	BEP52_RS16220	BJP78_RS16470	BJP74_RS15910	DFS55_RS08345	DBO90_RS09995	EX350_RS06105	FCV17_RS21270	FCV16_RS13810	FCV18_RS05305	JPH1_RS18165
MAV_RS03250	MAH_RS02955	BBJ32_RS12805	KV38_RS03035	BS641_RS03320	BEP52_RS02935	BJP78_RS02940	BJP74_RS02910	DFS55_RS21715	DBO90_RS01435	EX350_RS20735	FCV17_RS07895	FCV16_RS24615	FCV18_RS16100	JPH1_RS02940
MAV_RS05790	MAH_RS05295	BBJ32_RS02960	KV38_RS05520	BS641_RS07080	BEP52_RS05815	BJP78_RS05810	BJP74_RS05355	DFS55_RS19335	DBO90_RS15390	EX350_RS17050	FCV17_RS10685	FCV16_RS03225	FCV18_RS19535	JPH1_RS07135
MAV_RS06060	MAH_RS05535	BBJ32_RS02720	KV38_RS05770	BS641_RS07325	BEP52_RS06065	BJP78_RS06060	BJP74_RS05605	DFS55_RS19090	DBO90_RS15135	EX350_RS16800	FCV17_RS10980	FCV16_RS03520	FCV18_RS19830	JPH1_RS07390
MAV_RS18320	MAH_RS15925	BBJ32_RS15040	KV38_RS17080	BS641_RS19475	BEP52_RS16910	BJP78_RS17310	BJP74_RS16600	DFS55_RS07500	DBO90_RS02840	EX350_RS05385	FCV17_RS21975	FCV16_RS14510	FCV18_RS06010	JPH1_RS18860
MAV_RS11065	MAH_RS13755	BBJ32_RS20060	KV38_RS09855	BS641_RS13005	BEP52_RS14860	BJP78_RS15110	BJP74_RS11110	DFS55_RS14785	DBO90_RS10785	EX350_RS12705	FCV17_RS17180	FCV16_RS09720	FCV18_RS01210	JPH1_RS11750
MAV_RS15165	MAH_RS10470	BBJ32_RS18170	KV38_RS13830	BS641_RS08425	BEP52_RS11150	BJP78_RS11135	BJP74_RS14790	DFS55_RS10730	DBO90_RS06385	EX350_RS08505	FCV17_RS13380	FCV16_RS05920	FCV18_RS22230	JPH1_RS15735
MAV_RS21460	MAH_RS19045	BBJ32_RS06210	KV38_RS20815	BS641_RS22690	BEP52_RS20285	BJP78_RS20685	BJP74_RS19925	DFS55_RS04130	DBO90_RS19640	EX350_RS02135	FCV17_RS01010	FCV16_RS17750	FCV18_RS09255	JPH1_RS22075
MAV_RS23625	MAH_RS21230	BBJ32_RS08375	KV38_RS23080	BS641_RS24990	BEP52_RS22545	BJP78_RS22950	BJP74_RS22180	DFS55_RS01840	DBO90_RS21850	EX350_RS25465	FCV17_RS03325	FCV16_RS20065	FCV18_RS11555	JPH1_RS24380
MAV_RS07315	MAH_RS06570	BBJ32_RS01680	KV38_RS06885	BS641_RS16055	BEP52_RS07120	BJP78_RS07120	BJP74_RS06660	DFS55_RS17875	DBO90_RS14050	EX350_RS15595	FCV17_RS19945	FCV16_RS12485	FCV18_RS03980	JPH1_RS08900
MAV_RS18740	MAH_RS16350	BBJ32_RS14615	KV38_RS17510	BS641_RS19910	BEP52_RS17340	BJP78_RS17740	BJP74_RS17030	DFS55_RS07070	DBO90_RS02415	EX350_RS04940	FCV17_RS22405	FCV16_RS14940	FCV18_RS06440	JPH1_RS19290
MAV_RS05025	MAH_RS04450	BBJ32_RS03785	KV38_RS04655	BS641_RS06225	BEP52_RS04970	BJP78_RS04960	BJP74_RS04500	DFS55_RS20205	DBO90_RS16230	EX350_RS17915	FCV17_RS09905	FCV16_RS02440	FCV18_RS18665	JPH1_RS06260
MAV_RS06115	MAH_RS05590	BBJ32_RS02665	KV38_RS05825	BS641_RS07380	BEP52_RS06120	BJP78_RS06115	BJP74_RS05660	DFS55_RS19035	DBO90_RS15080	EX350_RS16745	FCV17_RS11035	FCV16_RS03575	FCV18_RS19885	JPH1_RS07445
MAV_RS05850	MAH_RS05355	BBJ32_RS02900	KV38_RS05580	BS641_RS07140	BEP52_RS05875	BJP78_RS05870	BJP74_RS05415	DFS55_RS19275	DBO90_RS15330	EX350_RS16990	FCV17_RS10745	FCV16_RS03285	FCV18_RS19595	JPH1_RS07195
MAV_RS22235	MAH_RS19840	BBJ32_RS06985	KV38_RS21645	BS641_RS23490	BEP52_RS21100	BJP78_RS21495	BJP74_RS20735	DFS55_RS03300	DBO90_RS20425	EX350_RS01290	FCV17_RS01815	FCV16_RS18555	FCV18_RS10060	JPH1_RS22860
MAV_RS05800	MAH_RS05305	BBJ32_RS02950	KV38_RS05530	BS641_RS07090	BEP52_RS05825	BJP78_RS05820	BJP74_RS05365	DFS55_RS19325	DBO90_RS15380	EX350_RS17040	FCV17_RS10695	FCV16_RS03235	FCV18_RS19545	JPH1_RS07145
MAV_RS15575	MAH_RS10065	BBJ32_RS17770	KV38_RS14295	BS641_RS16635	BEP52_RS10730	BJP78_RS10715	BJP74_RS10440	DFS55_RS10275	DBO90_RS05960	EX350_RS08105	FCV17_RS12950	FCV16_RS05495	FCV18_RS21815	JPH1_RS16125
MAV_RS00590	MAH_RS00675	BBJ32_RS11630	KV38_RS00575	BS641_RS00625	BEP52_RS00575	BJP78_RS00585	BJP74_RS00560	DFS55_RS24265	DBO90_RS00605	EX350_RS23200	FCV17_RS05525	FCV16_RS22240	FCV18_RS13730	JPH1_RS00585
MAV_RS06250	MAH_RS05725	BBJ32_RS02525	KV38_RS05980	BS641_RS07520	BEP52_RS06270	BJP78_RS06265	BJP74_RS05810	DFS55_RS18885	DBO90_RS14930	EX350_RS16590	FCV17_RS11190	FCV16_RS03730	FCV18_RS20040	JPH1_RS07600
MAV_RS02265	MAH_RS02140	BBJ32_RS10155	KV38_RS02210	BS641_RS02155	BEP52_RS02100	BJP78_RS02105	BJP74_RS02085	DFS55_RS22540	DBO90_RS04930	EX350_RS21560	FCV17_RS07065	FCV16_RS23785	FCV18_RS15270	JPH1_RS02115
MAV_RS13850	MAH_RS11740	BBJ32_RS21995	KV38_RS12045	BS641_RS10375	BEP52_RS12800	BJP78_RS12785	BJP74_RS13145	DFS55_RS12620	DBO90_RS07580	EX350_RS10395	FCV17_RS15115	FCV16_RS07655	FCV18_RS23990	JPH1_RS13795
MAV_RS07405	MAH_RS06660	BBJ32_RS01590	KV38_RS06990	BS641_RS15940	BEP52_RS07210	BJP78_RS07210	BJP74_RS06750	DFS55_RS17760	DBO90_RS13960	EX350_RS15490	FCV17_RS19855	FCV16_RS12395	FCV18_RS03890	JPH1_RS08990
MAV_RS03275	MAH_RS02980	BBJ32_RS12830	KV38_RS03060	BS641_RS03345	BEP52_RS02960	BJP78_RS02965	BJP74_RS02935	DFS55_RS21690	DBO90_RS01460	EX350_RS20710	FCV17_RS07920	FCV16_RS24640	FCV18_RS16125	JPH1_RS02965
MAV_RS04680	MAH_RS04100	BBJ32_RS13890	KV38_RS04300	BS641_RS05875	BEP52_RS04170	BJP78_RS04175	BJP74_RS04140	DFS55_RS20555	DBO90_RS16590	EX350_RS18270	FCV17_RS09550	FCV16_RS02085	FCV18_RS18310	JPH1_RS05895
MAV_RS05860	MAH_RS05365	BBJ32_RS02890	KV38_RS05590	BS641_RS07150	BEP52_RS05885	BJP78_RS05880	BJP74_RS05425	DFS55_RS19265	DBO90_RS15320	EX350_RS16980	FCV17_RS10755	FCV16_RS03295	FCV18_RS19605	JPH1_RS07205
MAV_RS00615	MAH_RS00700	BBJ32_RS11605	KV38_RS00600	BS641_RS00650	BEP52_RS00600	BJP78_RS00610	BJP74_RS00585	DFS55_RS24240	DBO90_RS00630	EX350_RS23175	FCV17_RS05550	FCV16_RS22265	FCV18_RS13755	JPH1_RS00610
MAV_RS23685	MAH_RS21290	BBJ32_RS08440	KV38_RS23145	BS641_RS25055	BEP52_RS22610	BJP78_RS23015	BJP74_RS22245	DFS55_RS01775	DBO90_RS21915	EX350_RS25400	FCV17_RS03390	FCV16_RS20130	FCV18_RS11620	JPH1_RS24445
MAV_RS24940	MAH_RS22170	BBJ32_RS09325	KV38_RS24000	BS641_RS25910	BEP52_RS23475	BJP78_RS23880	BJP74_RS23110	DFS55_RS00920	DBO90_RS22680	EX350_RS24550	FCV17_RS04240	FCV16_RS20980	FCV18_RS12470	JPH1_RS25300
MAV_RS05865	MAH_RS05370	BBJ32_RS02885	KV38_RS05595	BS641_RS07155	BEP52_RS05890	BJP78_RS05885	BJP74_RS05430	DFS55_RS19260	DBO90_RS15315	EX350_RS16975	FCV17_RS10760	FCV16_RS03300	FCV18_RS19610	JPH1_RS07210
MAV_RS05885	MAH_RS05390	BBJ32_RS02865	KV38_RS05615	BS641_RS07175	BEP52_RS05910	BJP78_RS05905	BJP74_RS05450	DFS55_RS19240	DBO90_RS15295	EX350_RS16955	FCV17_RS10780	FCV16_RS03320	FCV18_RS19630	JPH1_RS07230
MAV_RS25785	MAH_RS23740	BBJ32_RS22815	KV38_RS05650	BS641_RS07210	BEP52_RS05945	BJP78_RS05940	BJP74_RS05485	DFS55_RS19205	DBO90_RS15260	EX350_RS16920	FCV17_RS10835	FCV16_RS03375	FCV18_RS19685	JPH1_RS07270
MAV_RS15870	MAH_RS09800	BBJ32_RS17495	KV38_RS14575	BS641_RS16905	BEP52_RS10460	BJP78_RS10445	BJP74_RS10170	DFS55_RS10005	DBO90_RS05675	EX350_RS07835	FCV17_RS12680	FCV16_RS05225	FCV18_RS21545	JPH1_RS16395
MAV_RS08220	MAH_RS07470	BBJ32_RS00725	KV38_RS07970	BS641_RS15130	BEP52_RS08060	BJP78_RS08045	BJP74_RS07585	DFS55_RS16820	DBO90_RS13090	EX350_RS14670	FCV17_RS19045	FCV16_RS11585	FCV18_RS03075	JPH1_RS09805
MAV_RS11770	MAH_RS13080	BBJ32_RS20730	KV38_RS10815	BS641_RS12135	BEP52_RS14120	BJP78_RS14375	BJP74_RS11845	DFS55_RS13995	DBO90_RS08880	EX350_RS11840	FCV17_RS16445	FCV16_RS08985	FCV18_RS25325	JPH1_RS12475
MAV_RS03690	MAH_RS03335	BBJ32_RS13185	KV38_RS03410	BS641_RS03710	BEP52_RS03310	BJP78_RS03315	BJP74_RS03285	DFS55_RS21340	DBO90_RS17415	EX350_RS20365	FCV17_RS08265	FCV16_RS24985	FCV18_RS16470	JPH1_RS03310
MAV_RS23875	MAH_RS21480	BBJ32_RS08630	KV38_RS23335	BS641_RS25245	BEP52_RS22800	BJP78_RS23205	BJP74_RS22435	DFS55_RS01585	DBO90_RS22105	EX350_RS25210	FCV17_RS03580	FCV16_RS20320	FCV18_RS11810	JPH1_RS24635
MAV_RS17775	MAH_RS15325	BBJ32_RS15490	KV38_RS16450	BS641_RS19000	BEP52_RS16440	BJP78_RS16695	BJP74_RS16130	DFS55_RS08125	DBO90_RS10220	EX350_RS05880	FCV17_RS21500	FCV16_RS14040	FCV18_RS05535	JPH1_RS18390
MAV_RS17110	MAH_RS14640	BBJ32_RS16140	KV38_RS15785	BS641_RS18345	BEP52_RS15735	BJP78_RS15985	BJP74_RS15425	DFS55_RS08790	DBO90_RS09550	EX350_RS06545	FCV17_RS20835	FCV16_RS13375	FCV18_RS04870	JPH1_RS17725
MAV_RS17425	MAH_RS14945	BBJ32_RS15835	KV38_RS16095	BS641_RS18650	BEP52_RS16045	BJP78_RS16295	BJP74_RS15735	DFS55_RS08480	DBO90_RS09860	EX350_RS06235	FCV17_RS21140	FCV16_RS13680	FCV18_RS05175	JPH1_RS18030
MAV_RS23890	MAH_RS21495	BBJ32_RS08645	KV38_RS23350	BS641_RS25260	BEP52_RS22815	BJP78_RS23220	BJP74_RS22450	DFS55_RS01570	DBO90_RS22120	EX350_RS25195	FCV17_RS03595	FCV16_RS20335	FCV18_RS11825	JPH1_RS24650
MAV_RS22020	MAH_RS19625	BBJ32_RS06770	KV38_RS21420	BS641_RS23270	BEP52_RS20875	BJP78_RS21270	BJP74_RS20510	DFS55_RS03525	DBO90_RS20200	EX350_RS01515	FCV17_RS01590	FCV16_RS18330	FCV18_RS09835	JPH1_RS22635
MAV_RS21710	MAH_RS19295	BBJ32_RS06460	KV38_RS21085	BS641_RS22940	BEP52_RS20535	BJP78_RS20935	BJP74_RS20175	DFS55_RS03860	DBO90_RS19890	EX350_RS01865	FCV17_RS01280	FCV16_RS18020	FCV18_RS09525	JPH1_RS22325
MAV_RS01205	MAH_RS01290	BBJ32_RS11015	KV38_RS01195	BS641_RS01275	BEP52_RS01195	BJP78_RS01205	BJP74_RS01180	DFS55_RS23645	DBO90_RS04060	EX350_RS22580	FCV17_RS06145	FCV16_RS22865	FCV18_RS14350	JPH1_RS01205
MAV_RS21200	MAH_RS18785	BBJ32_RS05950	KV38_RS20555	BS641_RS22430	BEP52_RS20025	BJP78_RS20275	BJP74_RS19665	DFS55_RS04390	DBO90_RS19380	EX350_RS02395	FCV17_RS00750	FCV16_RS17490	FCV18_RS08995	JPH1_RS21815
MAV_RS06170	MAH_RS05645	BBJ32_RS02610	KV38_RS05885	BS641_RS07435	BEP52_RS06175	BJP78_RS06170	BJP74_RS05715	DFS55_RS18980	DBO90_RS15025	EX350_RS16690	FCV17_RS11095	FCV16_RS03635	FCV18_RS19945	JPH1_RS07505
MAV_RS21350	MAH_RS18935	BBJ32_RS06100	KV38_RS20705	BS641_RS22580	BEP52_RS20175	BJP78_RS20425	BJP74_RS19815	DFS55_RS04240	DBO90_RS19530	EX350_RS02245	FCV17_RS00900	FCV16_RS17640	FCV18_RS09145	JPH1_RS21965
MAV_RS16215	MAH_RS09475	BBJ32_RS17170	KV38_RS14905	BS641_RS17250	BEP52_RS10130	BJP78_RS10115	BJP74_RS09830	DFS55_RS09665	DBO90_RS05345	EX350_RS07510	FCV17_RS12360	FCV16_RS04900	FCV18_RS21220	JPH1_RS16735
MAV_RS14710	MAH_RS10905	BBJ32_RS22715	KV38_RS13385	BS641_RS08870	BEP52_RS11600	BJP78_RS11585	BJP74_RS14345	DFS55_RS11205	DBO90_RS06855	EX350_RS08985	FCV17_RS13855	FCV16_RS06395	FCV18_RS22705	JPH1_RS15255
MAV_RS23465	MAH_RS21070	BBJ32_RS08215	KV38_RS22915	BS641_RS24825	BEP52_RS22375	BJP78_RS22780	BJP74_RS22015	DFS55_RS02010	DBO90_RS21680	EX350_RS25635	FCV17_RS03155	FCV16_RS19895	FCV18_RS11385	JPH1_RS24210
MAV_RS13675	MAH_RS11915	BBJ32_RS21820	KV38_RS11870	BS641_RS10550	BEP52_RS12975	BJP78_RS12960	BJP74_RS12970	DFS55_RS12795	DBO90_RS07755	EX350_RS10570	FCV17_RS15290	FCV16_RS07830	FCV18_RS24170	JPH1_RS13620
MAV_RS20240	MAH_RS17830	BBJ32_RS04990	KV38_RS19575	BS641_RS21435	BEP52_RS18895	BJP78_RS19295	BJP74_RS18585	DFS55_RS05365	DBO90_RS18400	EX350_RS03430	FCV17_RS23955	FCV16_RS16495	FCV18_RS07995	JPH1_RS20800
MAV_RS05290	MAH_RS04710	BBJ32_RS03520	KV38_RS04920	BS641_RS06490	BEP52_RS05235	BJP78_RS05230	BJP74_RS04775	DFS55_RS19940	DBO90_RS15960	EX350_RS17650	FCV17_RS10175	FCV16_RS02710	FCV18_RS18930	JPH1_RS06525
MAV_RS14570	MAH_RS11045	BBJ32_RS22510	KV38_RS12765	BS641_RS09670	BEP52_RS12110	BJP78_RS12095	BJP74_RS13835	DFS55_RS11895	DBO90_RS07065	EX350_RS09725	FCV17_RS14365	FCV16_RS06905	FCV18_RS23505	JPH1_RS14510
MAV_RS11370	MAH_RS13445	BBJ32_RS20370	KV38_RS10380	BS641_RS12555	BEP52_RS14530	BJP78_RS14785	BJP74_RS11435	DFS55_RS14410	DBO90_RS09260	EX350_RS12270	FCV17_RS16880	FCV16_RS09420	FCV18_RS00910	JPH1_RS12045
MAV_RS07770	MAH_RS07045	BBJ32_RS01195	KV38_RS07395	BS641_RS15575	BEP52_RS07615	BJP78_RS07600	BJP74_RS07140	DFS55_RS17365	DBO90_RS13570	EX350_RS15120	FCV17_RS19490	FCV16_RS12030	FCV18_RS03520	JPH1_RS09360
MAV_RS25250	MAH_RS22475	BBJ32_RS09640	KV38_RS24325	BS641_RS26230	BEP52_RS23795	BJP78_RS24200	BJP74_RS23430	DFS55_RS00595	DBO90_RS23150	EX350_RS24225	FCV17_RS04595	FCV16_RS21310	FCV18_RS12800	JPH1_RS25620
MAV_RS18135	MAH_RS15680	BBJ32_RS15135	KV38_RS16820	BS641_RS19365	BEP52_RS16810	BJP78_RS17065	BJP74_RS16500	DFS55_RS07755	DBO90_RS02940	EX350_RS05505	FCV17_RS21870	FCV16_RS14405	FCV18_RS05905	JPH1_RS18755
MAV_RS05970	MAH_RS05445	BBJ32_RS02810	KV38_RS05675	BS641_RS07230	BEP52_RS05970	BJP78_RS05965	BJP74_RS05510	DFS55_RS19185	DBO90_RS15235	EX350_RS16900	FCV17_RS10885	FCV16_RS03425	FCV18_RS19735	JPH1_RS07295
MAV_RS21135	MAH_RS18720	BBJ32_RS05885	KV38_RS20490	BS641_RS22365	BEP52_RS19960	BJP78_RS20210	BJP74_RS19600	DFS55_RS04455	DBO90_RS19315	EX350_RS02460	FCV17_RS00685	FCV16_RS17425	FCV18_RS08930	JPH1_RS21750
MAV_RS15200	MAH_RS10435	BBJ32_RS18135	KV38_RS13865	BS641_RS08390	BEP52_RS11115	BJP78_RS11100	BJP74_RS14825	DFS55_RS10695	DBO90_RS06350	EX350_RS08470	FCV17_RS13345	FCV16_RS05885	FCV18_RS22195	JPH1_RS15770
MAV_RS02890	MAH_RS02595	BBJ32_RS12445	KV38_RS02670	BS641_RS02615	BEP52_RS02560	BJP78_RS02565	BJP74_RS02545	DFS55_RS22080	DBO90_RS01070	EX350_RS21100	FCV17_RS07525	FCV16_RS24245	FCV18_RS15730	JPH1_RS02575
MAV_RS17960	MAH_RS15505	BBJ32_RS15310	KV38_RS16645	BS641_RS19190	BEP52_RS16635	BJP78_RS16890	BJP74_RS16325	DFS55_RS07930	DBO90_RS03115	EX350_RS05685	FCV17_RS21695	FCV16_RS14235	FCV18_RS05730	JPH1_RS18580
MAV_RS22695	MAH_RS20305	BBJ32_RS07445	KV38_RS22135	BS641_RS24005	BEP52_RS21590	BJP78_RS21990	BJP74_RS21225	DFS55_RS02800	DBO90_RS20900	EX350_RS00800	FCV17_RS02330	FCV16_RS19070	FCV18_RS10570	JPH1_RS23370
MAV_RS20440	MAH_RS18030	BBJ32_RS05195	KV38_RS19780	BS641_RS21640	BEP52_RS19100	BJP78_RS19500	BJP74_RS18790	DFS55_RS05160	DBO90_RS18610	EX350_RS03225	FCV17_RS24160	FCV16_RS16695	FCV18_RS08200	JPH1_RS21005
MAV_RS10535	MAH_RS14115	BBJ32_RS19705	KV38_RS09480	BS641_RS13395	BEP52_RS15225	BJP78_RS15475	BJP74_RS10745	DFS55_RS15150	DBO90_RS11150	EX350_RS13075	FCV17_RS17550	FCV16_RS10090	FCV18_RS01580	JPH1_RS11380
MAV_RS03060	MAH_RS02765	BBJ32_RS12615	KV38_RS02840	BS641_RS02810	BEP52_RS02740	BJP78_RS02745	BJP74_RS02715	DFS55_RS21910	DBO90_RS01240	EX350_RS20930	FCV17_RS07695	FCV16_RS24415	FCV18_RS15900	JPH1_RS02745
MAV_RS25225	MAH_RS22450	BBJ32_RS09615	KV38_RS24300	BS641_RS26205	BEP52_RS23770	BJP78_RS24175	BJP74_RS23405	DFS55_RS00620	DBO90_RS23125	EX350_RS24250	FCV17_RS04570	FCV16_RS21285	FCV18_RS12775	JPH1_RS25595
MAV_RS23605	MAH_RS21210	BBJ32_RS08355	KV38_RS23060	BS641_RS24970	BEP52_RS22525	BJP78_RS22930	BJP74_RS22160	DFS55_RS01860	DBO90_RS21830	EX350_RS25485	FCV17_RS03305	FCV16_RS20045	FCV18_RS11535	JPH1_RS24360
MAV_RS05995	MAH_RS05470	BBJ32_RS02785	KV38_RS05705	BS641_RS07260	BEP52_RS06000	BJP78_RS05995	BJP74_RS05540	DFS55_RS19155	DBO90_RS15200	EX350_RS16870	FCV17_RS10915	FCV16_RS03455	FCV18_RS19765	JPH1_RS07325
MAV_RS10930	MAH_RS13900	BBJ32_RS19925	KV38_RS09700	BS641_RS13175	BEP52_RS15005	BJP78_RS15255	BJP74_RS10965	DFS55_RS14930	DBO90_RS10930	EX350_RS12855	FCV17_RS17330	FCV16_RS09870	FCV18_RS01360	JPH1_RS11600
MAV_RS10035	MAH_RS08465	BBJ32_RS19220	KV38_RS08975	BS641_RS13960	BEP52_RS09090	BJP78_RS09085	BJP74_RS08630	DFS55_RS15675	DBO90_RS11655	EX350_RS13600	FCV17_RS18065	FCV16_RS10605	FCV18_RS02095	JPH1_RS10845
MAV_RS23070	MAH_RS20680	BBJ32_RS07820	KV38_RS22515	BS641_RS24385	BEP52_RS21970	BJP78_RS22370	BJP74_RS21605	DFS55_RS02410	DBO90_RS21280	EX350_RS00395	FCV17_RS02710	FCV16_RS19450	FCV18_RS10950	JPH1_RS23770
MAV_RS14070	MAH_RS11520	BBJ32_RS22200	KV38_RS12270	BS641_RS10160	BEP52_RS12585	BJP78_RS12570	BJP74_RS13360	DFS55_RS12385	DBO90_RS07375	EX350_RS10190	FCV17_RS14875	FCV16_RS07415	FCV18_RS23750	JPH1_RS14035
MAV_RS21430	MAH_RS19015	BBJ32_RS06180	KV38_RS20785	BS641_RS22660	BEP52_RS20255	BJP78_RS20655	BJP74_RS19895	DFS55_RS04160	DBO90_RS19610	EX350_RS02165	FCV17_RS00980	FCV16_RS17720	FCV18_RS09225	JPH1_RS22045
MAV_RS13945	MAH_RS11645	BBJ32_RS22085	KV38_RS12145	BS641_RS10285	BEP52_RS12710	BJP78_RS12695	BJP74_RS13235	DFS55_RS12515	DBO90_RS07490	EX350_RS10300	FCV17_RS15000	FCV16_RS07540	FCV18_RS23875	JPH1_RS13905
MAV_RS16335	MAH_RS09355	BBJ32_RS17050	KV38_RS15025	BS641_RS17370	BEP52_RS10010	BJP78_RS09995	BJP74_RS09710	DFS55_RS09545	DBO90_RS05225	EX350_RS07390	FCV17_RS12240	FCV16_RS04780	FCV18_RS21100	JPH1_RS16855
MAV_RS02080	MAH_RS01955	BBJ32_RS10340	KV38_RS02015	BS641_RS01960	BEP52_RS01905	BJP78_RS01910	BJP74_RS01890	DFS55_RS22745	DBO90_RS04735	EX350_RS21765	FCV17_RS06870	FCV16_RS23590	FCV18_RS15075	JPH1_RS01910
MAV_RS06075	MAH_RS05550	BBJ32_RS02705	KV38_RS05785	BS641_RS07340	BEP52_RS06080	BJP78_RS06075	BJP74_RS05620	DFS55_RS19075	DBO90_RS15120	EX350_RS16785	FCV17_RS10995	FCV16_RS03535	FCV18_RS19845	JPH1_RS07405
MAV_RS00945	MAH_RS01030	BBJ32_RS11275	KV38_RS00930	BS641_RS00995	BEP52_RS00930	BJP78_RS00940	BJP74_RS00915	DFS55_RS23910	DBO90_RS03790	EX350_RS22845	FCV17_RS05880	FCV16_RS22600	FCV18_RS14085	JPH1_RS00940
MAV_RS06570	MAH_RS06055	BBJ32_RS02200	KV38_RS06310	BS641_RS07850	BEP52_RS06600	BJP78_RS06595	BJP74_RS06140	DFS55_RS18555	DBO90_RS14600	EX350_RS16260	FCV17_RS11520	FCV16_RS04060	FCV18_RS20380	JPH1_RS07930
MAV_RS02970	MAH_RS02675	BBJ32_RS12525	KV38_RS02750	BS641_RS02695	BEP52_RS02640	BJP78_RS02645	BJP74_RS02625	DFS55_RS22000	DBO90_RS01150	EX350_RS21020	FCV17_RS07605	FCV16_RS24325	FCV18_RS15810	JPH1_RS02655
MAV_RS05055	MAH_RS04480	BBJ32_RS03755	KV38_RS04685	BS641_RS06255	BEP52_RS05000	BJP78_RS04990	BJP74_RS04530	DFS55_RS20175	DBO90_RS16200	EX350_RS17885	FCV17_RS09935	FCV16_RS02470	FCV18_RS18695	JPH1_RS06290
MAV_RS13705	MAH_RS11885	BBJ32_RS21850	KV38_RS11900	BS641_RS10520	BEP52_RS12945	BJP78_RS12930	BJP74_RS13000	DFS55_RS12765	DBO90_RS07725	EX350_RS10540	FCV17_RS15260	FCV16_RS07800	FCV18_RS24140	JPH1_RS13650
MAV_RS16405	MAH_RS09280	BBJ32_RS16980	KV38_RS15095	BS641_RS17440	BEP52_RS09935	BJP78_RS09920	BJP74_RS09635	DFS55_RS09475	DBO90_RS05155	EX350_RS07320	FCV17_RS12170	FCV16_RS04710	FCV18_RS21030	JPH1_RS16925
MAV_RS08570	MAH_RS07820	BBJ32_RS00375	KV38_RS08330	BS641_RS14775	BEP52_RS08420	BJP78_RS08405	BJP74_RS07945	DFS55_RS16455	DBO90_RS12730	EX350_RS14310	FCV17_RS18685	FCV16_RS11225	FCV18_RS02715	JPH1_RS10160
MAV_RS25450	MAH_RS22680	BBJ32_RS09845	KV38_RS24540	BS641_RS26450	BEP52_RS24015	BJP78_RS24420	BJP74_RS23650	DFS55_RS24545	DBO90_RS23370	EX350_RS24010	FCV17_RS04805	FCV16_RS21520	FCV18_RS13010	JPH1_RS25830
MAV_RS17490	MAH_RS15040	BBJ32_RS15775	KV38_RS16160	BS641_RS18710	BEP52_RS16150	BJP78_RS16400	BJP74_RS15840	DFS55_RS08415	DBO90_RS09925	EX350_RS06175	FCV17_RS21200	FCV16_RS13740	FCV18_RS05235	JPH1_RS18095
MAV_RS01690	MAH_RS01555	BBJ32_RS10735	KV38_RS01485	BS641_RS01555	BEP52_RS01485	BJP78_RS01490	BJP74_RS01470	DFS55_RS23275	DBO90_RS04335	EX350_RS22190	FCV17_RS06460	FCV16_RS23180	FCV18_RS14665	JPH1_RS01500
MAV_RS06200	MAH_RS05675	BBJ32_RS02580	KV38_RS05925	BS641_RS07465	BEP52_RS06215	BJP78_RS06210	BJP74_RS05755	DFS55_RS18940	DBO90_RS14985	EX350_RS16650	FCV17_RS11135	FCV16_RS03675	FCV18_RS19985	JPH1_RS07545
MAV_RS09755	MAH_RS08190	BBJ32_RS18965	KV38_RS08720	BS641_RS14380	BEP52_RS08810	BJP78_RS08795	BJP74_RS08345	DFS55_RS16085	DBO90_RS11920	EX350_RS13865	FCV17_RS18320	FCV16_RS10860	FCV18_RS02350	JPH1_RS10575
MAV_RS10840	MAH_RS13990	BBJ32_RS19835	KV38_RS09610	BS641_RS13265	BEP52_RS15095	BJP78_RS15345	BJP74_RS10875	DFS55_RS15020	DBO90_RS11020	EX350_RS12945	FCV17_RS17420	FCV16_RS09960	FCV18_RS01450	JPH1_RS11510
MAV_RS06495	MAH_RS05975	BBJ32_RS02280	KV38_RS06225	BS641_RS07765	BEP52_RS06515	BJP78_RS06510	BJP74_RS06055	DFS55_RS18640	DBO90_RS14685	EX350_RS16345	FCV17_RS11435	FCV16_RS03975	FCV18_RS20295	JPH1_RS07845
MAV_RS24950	MAH_RS22180	BBJ32_RS09335	KV38_RS24015	BS641_RS25920	BEP52_RS23490	BJP78_RS23895	BJP74_RS23125	DFS55_RS00905	DBO90_RS22665	EX350_RS24535	FCV17_RS04250	FCV16_RS20990	FCV18_RS12480	JPH1_RS25310
MAV_RS00840	MAH_RS00925	BBJ32_RS11380	KV38_RS00825	BS641_RS00890	BEP52_RS00825	BJP78_RS00835	BJP74_RS00810	DFS55_RS24015	DBO90_RS03685	EX350_RS22950	FCV17_RS05775	FCV16_RS22495	FCV18_RS13980	JPH1_RS00835
MAV_RS03460	MAH_RS03100	BBJ32_RS12950	KV38_RS03185	BS641_RS03485	BEP52_RS03080	BJP78_RS03085	BJP74_RS03055	DFS55_RS21565	DBO90_RS01580	EX350_RS20590	FCV17_RS08040	FCV16_RS24760	FCV18_RS16245	JPH1_RS03085
MAV_RS17720	MAH_RS15270	BBJ32_RS15545	KV38_RS16395	BS641_RS18945	BEP52_RS16385	BJP78_RS16635	BJP74_RS16075	DFS55_RS08180	DBO90_RS10160	EX350_RS05935	FCV17_RS21440	FCV16_RS13980	FCV18_RS05475	JPH1_RS18330
MAV_RS16695	MAH_RS08990	BBJ32_RS16665	KV38_RS15390	BS641_RS17910	BEP52_RS09620	BJP78_RS09615	BJP74_RS09170	DFS55_RS09185	DBO90_RS03310	EX350_RS06980	FCV17_RS20405	FCV16_RS12945	FCV18_RS04440	JPH1_RS17295
MAV_RS04515	MAH_RS03915	BBJ32_RS13725	KV38_RS04120	BS641_RS05710	BEP52_RS03990	BJP78_RS03990	BJP74_RS03960	DFS55_RS20720	DBO90_RS16755	EX350_RS18435	FCV17_RS09385	FCV16_RS01920	FCV18_RS18145	JPH1_RS05730
MAV_RS06230	MAH_RS05705	BBJ32_RS02545	KV38_RS05960	BS641_RS07500	BEP52_RS06250	BJP78_RS06245	BJP74_RS05790	DFS55_RS18905	DBO90_RS14950	EX350_RS16615	FCV17_RS11170	FCV16_RS03710	FCV18_RS20020	JPH1_RS07580
MAV_RS19865	MAH_RS17455	BBJ32_RS04605	KV38_RS19185	BS641_RS21050	BEP52_RS18505	BJP78_RS18905	BJP74_RS18195	DFS55_RS05755	DBO90_RS18000	EX350_RS03820	FCV17_RS23525	FCV16_RS16070	FCV18_RS07570	JPH1_RS20410
MAV_RS05275	MAH_RS04695	BBJ32_RS03535	KV38_RS04905	BS641_RS06475	BEP52_RS05220	BJP78_RS05215	BJP74_RS04760	DFS55_RS19955	DBO90_RS15975	EX350_RS17665	FCV17_RS10160	FCV16_RS02695	FCV18_RS18915	JPH1_RS06510
MAV_RS03390	MAH_RS03030	BBJ32_RS12880	KV38_RS03110	BS641_RS03415	BEP52_RS03010	BJP78_RS03015	BJP74_RS02985	DFS55_RS21640	DBO90_RS01510	EX350_RS20660	FCV17_RS07970	FCV16_RS24690	FCV18_RS16175	JPH1_RS03015
MAV_RS11580	MAH_RS13250	BBJ32_RS20565	KV38_RS10640	BS641_RS12320	BEP52_RS14285	BJP78_RS14540	BJP74_RS11680	DFS55_RS14170	DBO90_RS09050	EX350_RS12025	FCV17_RS16640	FCV16_RS09180	FCV18_RS00670	JPH1_RS12290
MAV_RS10400	MAH_RS14250	BBJ32_RS19570	KV38_RS09345	BS641_RS13530	BEP52_RS15360	BJP78_RS15610	BJP74_RS10610	DFS55_RS15285	DBO90_RS11285	EX350_RS13210	FCV17_RS17685	FCV16_RS10225	FCV18_RS01715	JPH1_RS11245
MAV_RS14995	MAH_RS10635	BBJ32_RS18335	KV38_RS13655	BS641_RS08595	BEP52_RS11325	BJP78_RS11310	BJP74_RS14615	DFS55_RS10900	DBO90_RS06570	EX350_RS08680	FCV17_RS13555	FCV16_RS06095	FCV18_RS22405	JPH1_RS15560
MAV_RS24935	MAH_RS22165	BBJ32_RS09320	KV38_RS23995	BS641_RS25905	BEP52_RS23470	BJP78_RS23875	BJP74_RS23105	DFS55_RS00925	DBO90_RS22685	EX350_RS24555	FCV17_RS04235	FCV16_RS20975	FCV18_RS12465	JPH1_RS25295
MAV_RS15435	MAH_RS10210	BBJ32_RS17900	KV38_RS14100	BS641_RS16455	BEP52_RS10880	BJP78_RS10865	BJP74_RS15060	DFS55_RS10460	DBO90_RS06110	EX350_RS08230	FCV17_RS13090	FCV16_RS05630	FCV18_RS21940	JPH1_RS16005
MAV_RS20210	MAH_RS17800	BBJ32_RS04960	KV38_RS19545	BS641_RS21405	BEP52_RS18865	BJP78_RS19265	BJP74_RS18555	DFS55_RS05395	DBO90_RS18370	EX350_RS03460	FCV17_RS23925	FCV16_RS16465	FCV18_RS07965	JPH1_RS20770
MAV_RS16395	MAH_RS09290	BBJ32_RS16990	KV38_RS15085	BS641_RS17430	BEP52_RS09945	BJP78_RS09930	BJP74_RS09645	DFS55_RS09485	DBO90_RS05165	EX350_RS07330	FCV17_RS12180	FCV16_RS04720	FCV18_RS21040	JPH1_RS16915
MAV_RS06265	MAH_RS05740	BBJ32_RS02510	KV38_RS05995	BS641_RS07535	BEP52_RS06285	BJP78_RS06280	BJP74_RS05825	DFS55_RS18870	DBO90_RS14915	EX350_RS16575	FCV17_RS11205	FCV16_RS03745	FCV18_RS20055	JPH1_RS07615
MAV_RS15075	MAH_RS10555	BBJ32_RS18255	KV38_RS13740	BS641_RS08510	BEP52_RS11240	BJP78_RS11225	BJP74_RS14700	DFS55_RS10815	DBO90_RS06475	EX350_RS08595	FCV17_RS13470	FCV16_RS06010	FCV18_RS22320	JPH1_RS15645
MAV_RS03415	MAH_RS03055	BBJ32_RS12905	KV38_RS03140	BS641_RS03440	BEP52_RS03035	BJP78_RS03040	BJP74_RS03010	DFS55_RS21610	DBO90_RS01535	EX350_RS20635	FCV17_RS07995	FCV16_RS24715	FCV18_RS16200	JPH1_RS03040
MAV_RS05950	MAH_RS05425	BBJ32_RS02830	KV38_RS05655	BS641_RS07215	BEP52_RS05950	BJP78_RS05945	BJP74_RS05490	DFS55_RS19200	DBO90_RS15255	EX350_RS16915	FCV17_RS10840	FCV16_RS03380	FCV18_RS19690	JPH1_RS07275
MAV_RS25315	MAH_RS22540	BBJ32_RS09705	KV38_RS24390	BS641_RS26295	BEP52_RS23860	BJP78_RS24265	BJP74_RS23495	DFS55_RS00530	DBO90_RS23215	EX350_RS24160	FCV17_RS04660	FCV16_RS21375	FCV18_RS12865	JPH1_RS25685
MAV_RS03585	MAH_RS03235	BBJ32_RS13090	KV38_RS03315	BS641_RS03615	BEP52_RS03215	BJP78_RS03220	BJP74_RS03190	DFS55_RS21435	DBO90_RS17515	EX350_RS20460	FCV17_RS08170	FCV16_RS24890	FCV18_RS16375	JPH1_RS03215
MAV_RS09945	MAH_RS08365	BBJ32_RS19135	KV38_RS08890	BS641_RS14200	BEP52_RS08980	BJP78_RS08965	BJP74_RS08515	DFS55_RS15915	DBO90_RS11750	EX350_RS13695	FCV17_RS18150	FCV16_RS10690	FCV18_RS02180	JPH1_RS10750
MAV_RS18515	MAH_RS16120	BBJ32_RS14845	KV38_RS17275	BS641_RS19670	BEP52_RS17110	BJP78_RS17505	BJP74_RS16800	DFS55_RS07305	DBO90_RS02645	EX350_RS05175	FCV17_RS22170	FCV16_RS14705	FCV18_RS06205	JPH1_RS19055
MAV_RS22270	MAH_RS19875	BBJ32_RS07020	KV38_RS21680	BS641_RS23525	BEP52_RS21135	BJP78_RS21530	BJP74_RS20770	DFS55_RS03265	DBO90_RS20460	EX350_RS01255	FCV17_RS01850	FCV16_RS18590	FCV18_RS10095	JPH1_RS22895
MAV_RS10450	MAH_RS14200	BBJ32_RS19620	KV38_RS09395	BS641_RS13480	BEP52_RS15310	BJP78_RS15560	BJP74_RS10660	DFS55_RS15235	DBO90_RS11235	EX350_RS13160	FCV17_RS17635	FCV16_RS10175	FCV18_RS01665	JPH1_RS11295
MAV_RS00985	MAH_RS01070	BBJ32_RS11235	KV38_RS00970	BS641_RS01035	BEP52_RS00970	BJP78_RS00980	BJP74_RS00955	DFS55_RS23870	DBO90_RS03830	EX350_RS22805	FCV17_RS05920	FCV16_RS22640	FCV18_RS14125	JPH1_RS00980
MAV_RS06335	MAH_RS05810	BBJ32_RS02440	KV38_RS06065	BS641_RS07605	BEP52_RS06355	BJP78_RS06350	BJP74_RS05895	DFS55_RS18800	DBO90_RS14845	EX350_RS16505	FCV17_RS11275	FCV16_RS03815	FCV18_RS20135	JPH1_RS07685
MAV_RS20925	MAH_RS18510	BBJ32_RS05675	KV38_RS20270	BS641_RS22130	BEP52_RS19740	BJP78_RS19990	BJP74_RS19380	DFS55_RS04675	DBO90_RS19100	EX350_RS02715	FCV17_RS00445	FCV16_RS17185	FCV18_RS08690	JPH1_RS21505
MAV_RS17095	MAH_RS14625	BBJ32_RS16155	KV38_RS15770	BS641_RS18330	BEP52_RS15720	BJP78_RS15970	BJP74_RS15410	DFS55_RS08805	DBO90_RS09535	EX350_RS06560	FCV17_RS20820	FCV16_RS13360	FCV18_RS04855	JPH1_RS17710
MAV_RS21890	MAH_RS19475	BBJ32_RS06640	KV38_RS21265	BS641_RS23120	BEP52_RS20715	BJP78_RS21115	BJP74_RS20355	DFS55_RS03680	DBO90_RS20070	EX350_RS01685	FCV17_RS01460	FCV16_RS18200	FCV18_RS09705	JPH1_RS22505
MAV_RS06035	MAH_RS05510	BBJ32_RS02745	KV38_RS05745	BS641_RS07300	BEP52_RS06040	BJP78_RS06035	BJP74_RS05580	DFS55_RS19115	DBO90_RS15160	EX350_RS16830	FCV17_RS10955	FCV16_RS03495	FCV18_RS19805	JPH1_RS07365
MAV_RS18350	MAH_RS15955	BBJ32_RS15010	KV38_RS17110	BS641_RS19505	BEP52_RS16940	BJP78_RS17340	BJP74_RS16630	DFS55_RS07470	DBO90_RS02810	EX350_RS05355	FCV17_RS22005	FCV16_RS14540	FCV18_RS06040	JPH1_RS18890
MAV_RS00335	MAH_RS00445	BBJ32_RS11885	KV38_RS00340	BS641_RS00360	BEP52_RS00340	BJP78_RS00350	BJP74_RS00325	DFS55_RS00340	DBO90_RS00345	EX350_RS23435	FCV17_RS05295	FCV16_RS22010	FCV18_RS13505	JPH1_RS00360
MAV_RS03035	MAH_RS02740	BBJ32_RS12590	KV38_RS02815	BS641_RS02785	BEP52_RS02715	BJP78_RS02720	BJP74_RS02690	DFS55_RS21935	DBO90_RS01215	EX350_RS20955	FCV17_RS07670	FCV16_RS24390	FCV18_RS15875	JPH1_RS02720
MAV_RS05280	MAH_RS04700	BBJ32_RS03530	KV38_RS04910	BS641_RS06480	BEP52_RS05225	BJP78_RS05220	BJP74_RS04765	DFS55_RS19950	DBO90_RS15970	EX350_RS17660	FCV17_RS10165	FCV16_RS02700	FCV18_RS18920	JPH1_RS06515
MAV_RS24100	MAH_RS21705	BBJ32_RS08855	KV38_RS23570	BS641_RS25475	BEP52_RS23000	BJP78_RS23405	BJP74_RS22635	DFS55_RS01350	DBO90_RS22335	EX350_RS24980	FCV17_RS03810	FCV16_RS20550	FCV18_RS12040	JPH1_RS24870
MAV_RS01090	MAH_RS01175	BBJ32_RS11130	KV38_RS01080	BS641_RS01160	BEP52_RS01075	BJP78_RS01085	BJP74_RS01060	DFS55_RS23765	DBO90_RS03940	EX350_RS22700	FCV17_RS06025	FCV16_RS22745	FCV18_RS14230	JPH1_RS01085
MAV_RS06360	MAH_RS05835	BBJ32_RS02415	KV38_RS06090	BS641_RS07630	BEP52_RS06380	BJP78_RS06375	BJP74_RS05920	DFS55_RS18775	DBO90_RS14820	EX350_RS16480	FCV17_RS11300	FCV16_RS03840	FCV18_RS20160	JPH1_RS07710
MAV_RS04710	MAH_RS04130	BBJ32_RS13920	KV38_RS04330	BS641_RS05905	BEP52_RS04200	BJP78_RS04205	BJP74_RS04170	DFS55_RS20525	DBO90_RS16560	EX350_RS18240	FCV17_RS09580	FCV16_RS02115	FCV18_RS18340	JPH1_RS05935
MAV_RS03045	MAH_RS02750	BBJ32_RS12600	KV38_RS02825	BS641_RS02795	BEP52_RS02725	BJP78_RS02730	BJP74_RS02700	DFS55_RS21925	DBO90_RS01225	EX350_RS20945	FCV17_RS07680	FCV16_RS24400	FCV18_RS15885	JPH1_RS02730
MAV_RS13385	MAH_RS12195	BBJ32_RS21540	KV38_RS11580	BS641_RS10840	BEP52_RS13260	BJP78_RS13245	BJP74_RS12685	DFS55_RS13080	DBO90_RS08040	EX350_RS10850	FCV17_RS15575	FCV16_RS08115	FCV18_RS24455	JPH1_RS13335
MAV_RS07425	MAH_RS06680	BBJ32_RS01570	KV38_RS07010	BS641_RS15920	BEP52_RS07230	BJP78_RS07230	BJP74_RS06770	DFS55_RS17740	DBO90_RS13940	EX350_RS15470	FCV17_RS19835	FCV16_RS12375	FCV18_RS03870	JPH1_RS09010
MAV_RS04735	MAH_RS04155	BBJ32_RS13945	KV38_RS04355	BS641_RS05930	BEP52_RS04225	BJP78_RS04230	BJP74_RS04195	DFS55_RS20500	DBO90_RS16535	EX350_RS18215	FCV17_RS09605	FCV16_RS02140	FCV18_RS18365	JPH1_RS05960
MAV_RS25260	MAH_RS22485	BBJ32_RS09650	KV38_RS24335	BS641_RS26240	BEP52_RS23805	BJP78_RS24210	BJP74_RS23440	DFS55_RS00585	DBO90_RS23160	EX350_RS24215	FCV17_RS04605	FCV16_RS21320	FCV18_RS12810	JPH1_RS25630
MAV_RS23405	MAH_RS21010	BBJ32_RS08155	KV38_RS22855	BS641_RS24765	BEP52_RS22315	BJP78_RS22720	BJP74_RS21955	DFS55_RS02070	DBO90_RS21620	EX350_RS25695	FCV17_RS03095	FCV16_RS19835	FCV18_RS11325	JPH1_RS24150
MAV_RS04825	MAH_RS04245	BBJ32_RS14035	KV38_RS04445	BS641_RS06020	BEP52_RS04315	BJP78_RS04320	BJP74_RS04285	DFS55_RS20410	DBO90_RS16445	EX350_RS18125	FCV17_RS09695	FCV16_RS02230	FCV18_RS18455	JPH1_RS06050
MAV_RS00015	MAH_RS00010	BBJ32_RS09895	KV38_RS00015	BS641_RS00010	BEP52_RS00010	BJP78_RS00010	BJP74_RS00010	DFS55_RS00010	DBO90_RS00010	EX350_RS23955	FCV17_RS04860	FCV16_RS21575	FCV18_RS13065	JPH1_RS00010
MAV_RS06385	MAH_RS05860	BBJ32_RS02390	KV38_RS06115	BS641_RS07655	BEP52_RS06405	BJP78_RS06400	BJP74_RS05945	DFS55_RS18750	DBO90_RS14795	EX350_RS16455	FCV17_RS11325	FCV16_RS03865	FCV18_RS20185	JPH1_RS07735
MAV_RS03490	MAH_RS03130	BBJ32_RS12985	KV38_RS03215	BS641_RS03515	BEP52_RS03110	BJP78_RS03115	BJP74_RS03085	DFS55_RS21535	DBO90_RS17620	EX350_RS20560	FCV17_RS08070	FCV16_RS24790	FCV18_RS16275	JPH1_RS03115
MAV_RS20535	MAH_RS18125	BBJ32_RS05290	KV38_RS19880	BS641_RS21740	BEP52_RS19205	BJP78_RS19605	BJP74_RS18895	DFS55_RS05060	DBO90_RS18710	EX350_RS03125	FCV17_RS24260	FCV16_RS16795	FCV18_RS08300	JPH1_RS21105
MAV_RS06420	MAH_RS05895	BBJ32_RS02355	KV38_RS06150	BS641_RS07690	BEP52_RS06440	BJP78_RS06435	BJP74_RS05980	DFS55_RS18715	DBO90_RS14760	EX350_RS16420	FCV17_RS11360	FCV16_RS03900	FCV18_RS20220	JPH1_RS07770
MAV_RS09800	MAH_RS08235	BBJ32_RS19010	KV38_RS08765	BS641_RS14335	BEP52_RS08855	BJP78_RS08840	BJP74_RS08390	DFS55_RS16040	DBO90_RS11875	EX350_RS13820	FCV17_RS18275	FCV16_RS10815	FCV18_RS02305	JPH1_RS10620
MAV_RS14670	MAH_RS10945	BBJ32_RS22675	KV38_RS13345	BS641_RS08910	BEP52_RS11640	BJP78_RS11625	BJP74_RS14305	DFS55_RS11245	DBO90_RS06895	EX350_RS09025	FCV17_RS13895	FCV16_RS06435	FCV18_RS22745	JPH1_RS15215
MAV_RS11085	MAH_RS13735	BBJ32_RS20080	KV38_RS09875	BS641_RS12985	BEP52_RS14840	BJP78_RS15090	BJP74_RS11130	DFS55_RS14765	DBO90_RS10765	EX350_RS12685	FCV17_RS17160	FCV16_RS09700	FCV18_RS01190	JPH1_RS11770
MAV_RS16830	MAH_RS08855	BBJ32_RS16530	KV38_RS15525	BS641_RS18045	BEP52_RS09485	BJP78_RS09480	BJP74_RS09035	DFS55_RS09050	DBO90_RS03175	EX350_RS06845	FCV17_RS20540	FCV16_RS13080	FCV18_RS04575	JPH1_RS17430
MAV_RS14395	MAH_RS11220	BBJ32_RS22395	KV38_RS12605	BS641_RS09825	BEP52_RS12280	BJP78_RS12265	BJP74_RS13665	DFS55_RS12050	DBO90_RS07180	EX350_RS09880	FCV17_RS14525	FCV16_RS07065	FCV18_RS23665	JPH1_RS14355
MAV_RS16940	MAH_RS14470	BBJ32_RS16300	KV38_RS15625	BS641_RS18180	BEP52_RS15570	BJP78_RS15820	BJP74_RS15260	DFS55_RS08950	DBO90_RS09390	EX350_RS06715	FCV17_RS20670	FCV16_RS13210	FCV18_RS04705	JPH1_RS17560
MAV_RS23575	MAH_RS21180	BBJ32_RS08325	KV38_RS23030	BS641_RS24940	BEP52_RS22495	BJP78_RS22900	BJP74_RS22130	DFS55_RS01890	DBO90_RS21800	EX350_RS25515	FCV17_RS03275	FCV16_RS20015	FCV18_RS11505	JPH1_RS24330
MAV_RS06500	MAH_RS05980	BBJ32_RS02275	KV38_RS06230	BS641_RS07770	BEP52_RS06520	BJP78_RS06515	BJP74_RS06060	DFS55_RS18635	DBO90_RS14680	EX350_RS16340	FCV17_RS11440	FCV16_RS03980	FCV18_RS20300	JPH1_RS07850
MAV_RS15490	MAH_RS10170	BBJ32_RS17865	KV38_RS14145	BS641_RS16535	BEP52_RS10835	BJP78_RS10820	BJP74_RS15105	DFS55_RS10405	DBO90_RS06070	EX350_RS08190	FCV17_RS13030	FCV16_RS05575	FCV18_RS21895	JPH1_RS16045
MAV_RS18535	MAH_RS16140	BBJ32_RS14825	KV38_RS17295	BS641_RS19690	BEP52_RS17130	BJP78_RS17525	BJP74_RS16820	DFS55_RS07285	DBO90_RS02625	EX350_RS05155	FCV17_RS22190	FCV16_RS14725	FCV18_RS06225	JPH1_RS19075
MAV_RS04355	MAH_RS03720	BBJ32_RS13565	KV38_RS03920	BS641_RS05545	BEP52_RS03790	BJP78_RS03790	BJP74_RS03760	DFS55_RS20885	DBO90_RS16915	EX350_RS18600	FCV17_RS09220	FCV16_RS01755	FCV18_RS17980	JPH1_RS05565
MAV_RS06640	MAH_RS06125	BBJ32_RS02125	KV38_RS06380	BS641_RS07920	BEP52_RS06670	BJP78_RS06665	BJP74_RS06210	DFS55_RS18480	DBO90_RS14525	EX350_RS16185	FCV17_RS11590	FCV16_RS04130	FCV18_RS20450	JPH1_RS08000
MAV_RS11905	MAH_RS12960	BBJ32_RS20850	KV38_RS10935	BS641_RS12015	BEP52_RS14000	BJP78_RS14255	BJP74_RS11965	DFS55_RS13875	DBO90_RS08760	EX350_RS11720	FCV17_RS16325	FCV16_RS08865	FCV18_RS25205	JPH1_RS12595
MAV_RS13920	MAH_RS11670	BBJ32_RS22060	KV38_RS12120	BS641_RS10310	BEP52_RS12735	BJP78_RS12720	BJP74_RS13210	DFS55_RS12540	DBO90_RS07515	EX350_RS10325	FCV17_RS15025	FCV16_RS07565	FCV18_RS23900	JPH1_RS13880
MAV_RS22275	MAH_RS19880	BBJ32_RS07025	KV38_RS21685	BS641_RS23530	BEP52_RS21140	BJP78_RS21535	BJP74_RS20775	DFS55_RS03260	DBO90_RS20465	EX350_RS01250	FCV17_RS01855	FCV16_RS18595	FCV18_RS10100	JPH1_RS22900
MAV_RS23320	MAH_RS20925	BBJ32_RS08070	KV38_RS22770	BS641_RS24680	BEP52_RS22230	BJP78_RS22630	BJP74_RS21870	DFS55_RS02155	DBO90_RS21535	EX350_RS00095	FCV17_RS03010	FCV16_RS19750	FCV18_RS11240	JPH1_RS24065
MAV_RS08325	MAH_RS07575	BBJ32_RS00620	KV38_RS08075	BS641_RS15025	BEP52_RS08165	BJP78_RS08150	BJP74_RS07690	DFS55_RS16710	DBO90_RS12985	EX350_RS14565	FCV17_RS18940	FCV16_RS11480	FCV18_RS02970	JPH1_RS09905
MAV_RS20155	MAH_RS17745	BBJ32_RS04905	KV38_RS19490	BS641_RS21350	BEP52_RS18810	BJP78_RS19210	BJP74_RS18500	DFS55_RS05450	DBO90_RS18315	EX350_RS03515	FCV17_RS23835	FCV16_RS16375	FCV18_RS07875	JPH1_RS20715
MAV_RS05310	MAH_RS04760	BBJ32_RS03495	KV38_RS04985	BS641_RS06520	BEP52_RS05280	BJP78_RS05275	BJP74_RS04820	DFS55_RS19895	DBO90_RS15925	EX350_RS17585	FCV17_RS10245	FCV16_RS02785	FCV18_RS19000	JPH1_RS06565
MAV_RS25800	MAH_RS23755	BBJ32_RS22805	KV38_RS06235	BS641_RS07775	BEP52_RS06525	BJP78_RS06520	BJP74_RS06065	DFS55_RS18630	DBO90_RS14675	EX350_RS16335	FCV17_RS11445	FCV16_RS03985	FCV18_RS20305	JPH1_RS07855
MAV_RS22490	MAH_RS20100	BBJ32_RS07240	KV38_RS21930	BS641_RS23800	BEP52_RS21385	BJP78_RS21785	BJP74_RS21020	DFS55_RS03015	DBO90_RS20695	EX350_RS01005	FCV17_RS02100	FCV16_RS18840	FCV18_RS10345	JPH1_RS23140
MAV_RS11430	MAH_RS13385	BBJ32_RS20430	KV38_RS10440	BS641_RS12495	BEP52_RS14470	BJP78_RS14725	BJP74_RS11495	DFS55_RS14350	DBO90_RS09200	EX350_RS12210	FCV17_RS16820	FCV16_RS09360	FCV18_RS00850	JPH1_RS12105
MAV_RS10390	MAH_RS14260	BBJ32_RS19560	KV38_RS09335	BS641_RS13540	BEP52_RS15370	BJP78_RS15620	BJP74_RS10600	DFS55_RS15295	DBO90_RS11295	EX350_RS13220	FCV17_RS17695	FCV16_RS10235	FCV18_RS01725	JPH1_RS11235
MAV_RS16785	MAH_RS08900	BBJ32_RS16575	KV38_RS15480	BS641_RS18000	BEP52_RS09530	BJP78_RS09525	BJP74_RS09080	DFS55_RS09095	DBO90_RS03220	EX350_RS06890	FCV17_RS20495	FCV16_RS13035	FCV18_RS04530	JPH1_RS17385
MAV_RS07310	MAH_RS06565	BBJ32_RS01685	KV38_RS06880	BS641_RS16060	BEP52_RS07115	BJP78_RS07115	BJP74_RS06655	DFS55_RS17880	DBO90_RS14055	EX350_RS15600	FCV17_RS19950	FCV16_RS12490	FCV18_RS03985	JPH1_RS08895
MAV_RS07715	MAH_RS06990	BBJ32_RS01250	KV38_RS07340	BS641_RS15630	BEP52_RS07560	BJP78_RS07545	BJP74_RS07085	DFS55_RS17420	DBO90_RS13625	EX350_RS15175	FCV17_RS19545	FCV16_RS12085	FCV18_RS03575	JPH1_RS09305
MAV_RS13615	MAH_RS11975	BBJ32_RS21760	KV38_RS11805	BS641_RS10610	BEP52_RS13035	BJP78_RS13020	BJP74_RS12910	DFS55_RS12855	DBO90_RS07815	EX350_RS10630	FCV17_RS15350	FCV16_RS07890	FCV18_RS24230	JPH1_RS13560
MAV_RS13355	MAH_RS12225	BBJ32_RS21510	KV38_RS11550	BS641_RS10870	BEP52_RS13290	BJP78_RS13275	BJP74_RS12655	DFS55_RS13110	DBO90_RS08070	EX350_RS10880	FCV17_RS15605	FCV16_RS08145	FCV18_RS24485	JPH1_RS13305
MAV_RS07735	MAH_RS07010	BBJ32_RS01230	KV38_RS07360	BS641_RS15610	BEP52_RS07580	BJP78_RS07565	BJP74_RS07105	DFS55_RS17400	DBO90_RS13605	EX350_RS15155	FCV17_RS19525	FCV16_RS12065	FCV18_RS03555	JPH1_RS09325
MAV_RS15645	MAH_RS10015	BBJ32_RS17720	KV38_RS14345	BS641_RS16685	BEP52_RS10680	BJP78_RS10665	BJP74_RS10390	DFS55_RS10225	DBO90_RS05910	EX350_RS08055	FCV17_RS12900	FCV16_RS05445	FCV18_RS21765	JPH1_RS16175
MAV_RS06520	MAH_RS06000	BBJ32_RS02255	KV38_RS06255	BS641_RS07795	BEP52_RS06545	BJP78_RS06540	BJP74_RS06085	DFS55_RS18610	DBO90_RS14655	EX350_RS16315	FCV17_RS11465	FCV16_RS04005	FCV18_RS20325	JPH1_RS07875
MAV_RS18105	MAH_RS15650	BBJ32_RS15165	KV38_RS16790	BS641_RS19335	BEP52_RS16780	BJP78_RS17035	BJP74_RS16470	DFS55_RS07785	DBO90_RS02970	EX350_RS05535	FCV17_RS21840	FCV16_RS14375	FCV18_RS05875	JPH1_RS18725
MAV_RS05750	MAH_RS05255	BBJ32_RS03000	KV38_RS05480	BS641_RS07040	BEP52_RS05775	BJP78_RS05770	BJP74_RS05315	DFS55_RS19375	DBO90_RS15430	EX350_RS17090	FCV17_RS10645	FCV16_RS03185	FCV18_RS19495	JPH1_RS07095
MAV_RS21270	MAH_RS18855	BBJ32_RS06020	KV38_RS20625	BS641_RS22500	BEP52_RS20095	BJP78_RS20345	BJP74_RS19735	DFS55_RS04320	DBO90_RS19450	EX350_RS02325	FCV17_RS00820	FCV16_RS17560	FCV18_RS09065	JPH1_RS21885
MAV_RS13065	MAH_RS12505	BBJ32_RS21195	KV38_RS11290	BS641_RS11185	BEP52_RS13580	BJP78_RS13565	BJP74_RS12365	DFS55_RS13370	DBO90_RS08405	EX350_RS11190	FCV17_RS15900	FCV16_RS08440	FCV18_RS24780	JPH1_RS12995
MAV_RS10835	MAH_RS13995	BBJ32_RS19830	KV38_RS09605	BS641_RS13270	BEP52_RS15100	BJP78_RS15350	BJP74_RS10870	DFS55_RS15025	DBO90_RS11025	EX350_RS12950	FCV17_RS17425	FCV16_RS09965	FCV18_RS01455	JPH1_RS11505
MAV_RS14895	MAH_RS10750	BBJ32_RS00105	KV38_RS13540	BS641_RS08715	BEP52_RS11445	BJP78_RS11430	BJP74_RS14495	DFS55_RS11020	DBO90_RS06690	EX350_RS08800	FCV17_RS13670	FCV16_RS06210	FCV18_RS22520	JPH1_RS15440
MAV_RS06595	MAH_RS06080	BBJ32_RS02175	KV38_RS06335	BS641_RS07875	BEP52_RS06625	BJP78_RS06620	BJP74_RS06165	DFS55_RS18530	DBO90_RS14575	EX350_RS16235	FCV17_RS11545	FCV16_RS04085	FCV18_RS20405	JPH1_RS07955
MAV_RS21140	MAH_RS18725	BBJ32_RS05890	KV38_RS20495	BS641_RS22370	BEP52_RS19965	BJP78_RS20215	BJP74_RS19605	DFS55_RS04450	DBO90_RS19320	EX350_RS02455	FCV17_RS00690	FCV16_RS17430	FCV18_RS08935	JPH1_RS21755
MAV_RS22810	MAH_RS20420	BBJ32_RS07560	KV38_RS22250	BS641_RS24120	BEP52_RS21705	BJP78_RS22105	BJP74_RS21340	DFS55_RS02675	DBO90_RS21015	EX350_RS00685	FCV17_RS02445	FCV16_RS19185	FCV18_RS10685	JPH1_RS23485
MAV_RS05780	MAH_RS05285	BBJ32_RS02970	KV38_RS05510	BS641_RS07070	BEP52_RS05805	BJP78_RS05800	BJP74_RS05345	DFS55_RS19345	DBO90_RS15400	EX350_RS17060	FCV17_RS10675	FCV16_RS03215	FCV18_RS19525	JPH1_RS07125
MAV_RS04125	MAH_RS03480	BBJ32_RS13335	KV38_RS03690	BS641_RS05315	BEP52_RS03560	BJP78_RS03560	BJP74_RS03530	DFS55_RS21115	DBO90_RS17150	EX350_RS18835	FCV17_RS08990	FCV16_RS01525	FCV18_RS17750	JPH1_RS05335
MAV_RS03475	MAH_RS03115	BBJ32_RS12970	KV38_RS03200	BS641_RS03500	BEP52_RS03095	BJP78_RS03100	BJP74_RS03070	DFS55_RS21550	DBO90_RS17635	EX350_RS20575	FCV17_RS08055	FCV16_RS24775	FCV18_RS16260	JPH1_RS03100
MAV_RS00890	MAH_RS00975	BBJ32_RS11330	KV38_RS00875	BS641_RS00940	BEP52_RS00875	BJP78_RS00885	BJP74_RS00860	DFS55_RS23965	DBO90_RS03735	EX350_RS22900	FCV17_RS05825	FCV16_RS22545	FCV18_RS14030	JPH1_RS00885
MAV_RS03010	MAH_RS02715	BBJ32_RS12565	KV38_RS02790	BS641_RS02760	BEP52_RS02690	BJP78_RS02695	BJP74_RS02665	DFS55_RS21960	DBO90_RS01190	EX350_RS20980	FCV17_RS07645	FCV16_RS24365	FCV18_RS15850	JPH1_RS02695
MAV_RS21590	MAH_RS19175	BBJ32_RS06340	KV38_RS20945	BS641_RS22820	BEP52_RS20415	BJP78_RS20815	BJP74_RS20055	DFS55_RS04000	DBO90_RS19770	EX350_RS02005	FCV17_RS01140	FCV16_RS17880	FCV18_RS09385	JPH1_RS22205
MAV_RS00780	MAH_RS00865	BBJ32_RS11440	KV38_RS00765	BS641_RS00820	BEP52_RS00765	BJP78_RS00775	BJP74_RS00750	DFS55_RS24075	DBO90_RS03625	EX350_RS23010	FCV17_RS05715	FCV16_RS22430	FCV18_RS13920	JPH1_RS00775
MAV_RS05010	MAH_RS04435	BBJ32_RS03800	KV38_RS04640	BS641_RS06210	BEP52_RS04955	BJP78_RS04945	BJP74_RS04485	DFS55_RS20220	DBO90_RS16245	EX350_RS17930	FCV17_RS09890	FCV16_RS02425	FCV18_RS18650	JPH1_RS06245
MAV_RS19470	MAH_RS17075	BBJ32_RS04200	KV38_RS18690	BS641_RS20670	BEP52_RS18075	BJP78_RS18475	BJP74_RS17765	DFS55_RS06345	DBO90_RS01625	EX350_RS04200	FCV17_RS23160	FCV16_RS15695	FCV18_RS07195	JPH1_RS20030
MAV_RS25440	MAH_RS22670	BBJ32_RS09835	KV38_RS24530	BS641_RS26440	BEP52_RS24005	BJP78_RS24410	BJP74_RS23640	DFS55_RS24535	DBO90_RS23360	EX350_RS24020	FCV17_RS04795	FCV16_RS21510	FCV18_RS13000	JPH1_RS25820
MAV_RS07975	MAH_RS07250	BBJ32_RS00945	KV38_RS07740	BS641_RS15360	BEP52_RS07835	BJP78_RS07820	BJP74_RS07360	DFS55_RS17050	DBO90_RS13310	EX350_RS14905	FCV17_RS19275	FCV16_RS11815	FCV18_RS03305	JPH1_RS09575
MAV_RS15210	MAH_RS10425	BBJ32_RS18125	KV38_RS13875	BS641_RS08380	BEP52_RS11105	BJP78_RS11090	BJP74_RS14835	DFS55_RS10685	DBO90_RS06340	EX350_RS08460	FCV17_RS13335	FCV16_RS05875	FCV18_RS22185	JPH1_RS15780
MAV_RS22350	MAH_RS19960	BBJ32_RS07100	KV38_RS21780	BS641_RS23645	BEP52_RS21235	BJP78_RS21630	BJP74_RS20870	DFS55_RS03170	DBO90_RS20545	EX350_RS01160	FCV17_RS01950	FCV16_RS18690	FCV18_RS10195	JPH1_RS22990
MAV_RS14560	MAH_RS11055	BBJ32_RS22520	KV38_RS12755	BS641_RS09680	BEP52_RS12120	BJP78_RS12105	BJP74_RS13825	DFS55_RS11905	DBO90_RS07055	EX350_RS09735	FCV17_RS14375	FCV16_RS06915	FCV18_RS23515	JPH1_RS14500
MAV_RS06655	MAH_RS06140	BBJ32_RS02110	KV38_RS06395	BS641_RS07935	BEP52_RS06685	BJP78_RS06680	BJP74_RS06225	DFS55_RS18465	DBO90_RS14510	EX350_RS16170	FCV17_RS11605	FCV16_RS04145	FCV18_RS20465	JPH1_RS08015
MAV_RS10180	MAH_RS08610	BBJ32_RS19365	KV38_RS09130	BS641_RS13805	BEP52_RS09245	BJP78_RS09240	BJP74_RS08785	DFS55_RS15520	DBO90_RS11500	EX350_RS13445	FCV17_RS17910	FCV16_RS10450	FCV18_RS01940	JPH1_RS11000
MAV_RS16220	MAH_RS09470	BBJ32_RS17165	KV38_RS14910	BS641_RS17255	BEP52_RS10125	BJP78_RS10110	BJP74_RS09825	DFS55_RS09660	DBO90_RS05340	EX350_RS07505	FCV17_RS12355	FCV16_RS04895	FCV18_RS21215	JPH1_RS16740
MAV_RS07220	MAH_RS06475	BBJ32_RS01775	KV38_RS06785	BS641_RS16155	BEP52_RS07020	BJP78_RS07020	BJP74_RS06560	DFS55_RS17975	DBO90_RS14150	EX350_RS15695	FCV17_RS20045	FCV16_RS12585	FCV18_RS04080	JPH1_RS08800
MAV_RS06900	MAH_RS06385	BBJ32_RS01870	KV38_RS06640	BS641_RS08185	BEP52_RS06930	BJP78_RS06930	BJP74_RS06470	DFS55_RS18220	DBO90_RS14250	EX350_RS15925	FCV17_RS11850	FCV16_RS04390	FCV18_RS20710	JPH1_RS08260
MAV_RS02965	MAH_RS02670	BBJ32_RS12520	KV38_RS02745	BS641_RS02690	BEP52_RS02635	BJP78_RS02640	BJP74_RS02620	DFS55_RS22005	DBO90_RS01145	EX350_RS21025	FCV17_RS07600	FCV16_RS24320	FCV18_RS15805	JPH1_RS02650
MAV_RS03015	MAH_RS02720	BBJ32_RS12570	KV38_RS02795	BS641_RS02765	BEP52_RS02695	BJP78_RS02700	BJP74_RS02670	DFS55_RS21955	DBO90_RS01195	EX350_RS20975	FCV17_RS07650	FCV16_RS24370	FCV18_RS15855	JPH1_RS02700
MAV_RS02470	MAH_RS02175	BBJ32_RS10120	KV38_RS02245	BS641_RS02190	BEP52_RS02135	BJP78_RS02140	BJP74_RS02120	DFS55_RS22505	DBO90_RS04965	EX350_RS21525	FCV17_RS07100	FCV16_RS23820	FCV18_RS15305	JPH1_RS02150
MAV_RS11265	MAH_RS13535	BBJ32_RS20260	KV38_RS10290	BS641_RS12645	BEP52_RS14620	BJP78_RS14875	BJP74_RS11345	DFS55_RS14500	DBO90_RS10580	EX350_RS12360	FCV17_RS16970	FCV16_RS09510	FCV18_RS01000	JPH1_RS11955
MAV_RS07725	MAH_RS07000	BBJ32_RS01240	KV38_RS07350	BS641_RS15620	BEP52_RS07570	BJP78_RS07555	BJP74_RS07095	DFS55_RS17410	DBO90_RS13615	EX350_RS15165	FCV17_RS19535	FCV16_RS12075	FCV18_RS03565	JPH1_RS09315
MAV_RS01830	MAH_RS01695	BBJ32_RS10590	KV38_RS01755	BS641_RS01705	BEP52_RS01635	BJP78_RS01640	BJP74_RS01620	DFS55_RS23010	DBO90_RS04480	EX350_RS22040	FCV17_RS06605	FCV16_RS23325	FCV18_RS14810	JPH1_RS01645
MAV_RS06670	MAH_RS06155	BBJ32_RS02095	KV38_RS06410	BS641_RS07950	BEP52_RS06700	BJP78_RS06695	BJP74_RS06240	DFS55_RS18450	DBO90_RS14495	EX350_RS16155	FCV17_RS11620	FCV16_RS04160	FCV18_RS20480	JPH1_RS08030
MAV_RS19215	MAH_RS16820	BBJ32_RS03950	KV38_RS18435	BS641_RS20415	BEP52_RS17820	BJP78_RS18220	BJP74_RS17510	DFS55_RS06600	DBO90_RS01880	EX350_RS04455	FCV17_RS22895	FCV16_RS15430	FCV18_RS06930	JPH1_RS19775
MAV_RS01850	MAH_RS01715	BBJ32_RS10570	KV38_RS01775	BS641_RS01725	BEP52_RS01655	BJP78_RS01660	BJP74_RS01640	DFS55_RS22990	DBO90_RS04500	EX350_RS22020	FCV17_RS06625	FCV16_RS23345	FCV18_RS14830	JPH1_RS01665
MAV_RS15415	MAH_RS10230	BBJ32_RS17920	KV38_RS14080	BS641_RS16435	BEP52_RS10900	BJP78_RS10885	BJP74_RS15040	DFS55_RS10480	DBO90_RS06135	EX350_RS08250	FCV17_RS13110	FCV16_RS05650	FCV18_RS21960	JPH1_RS15985
MAV_RS18695	MAH_RS16305	BBJ32_RS14660	KV38_RS17465	BS641_RS19865	BEP52_RS17295	BJP78_RS17695	BJP74_RS16985	DFS55_RS07115	DBO90_RS02460	EX350_RS04985	FCV17_RS22360	FCV16_RS14895	FCV18_RS06395	JPH1_RS19245
MAV_RS08105	MAH_RS07355	BBJ32_RS00840	KV38_RS07850	BS641_RS15250	BEP52_RS07945	BJP78_RS07930	BJP74_RS07470	DFS55_RS16940	DBO90_RS13205	EX350_RS14790	FCV17_RS19165	FCV16_RS11705	FCV18_RS03195	JPH1_RS09685
MAV_RS07730	MAH_RS07005	BBJ32_RS01235	KV38_RS07355	BS641_RS15615	BEP52_RS07575	BJP78_RS07560	BJP74_RS07100	DFS55_RS17405	DBO90_RS13610	EX350_RS15160	FCV17_RS19530	FCV16_RS12070	FCV18_RS03560	JPH1_RS09320
MAV_RS14820	MAH_RS10825	BBJ32_RS00030	KV38_RS13465	BS641_RS08790	BEP52_RS11520	BJP78_RS11505	BJP74_RS14425	DFS55_RS11095	DBO90_RS06765	EX350_RS08875	FCV17_RS13745	FCV16_RS06285	FCV18_RS22595	JPH1_RS15365
MAV_RS20335	MAH_RS17925	BBJ32_RS05085	KV38_RS19675	BS641_RS21535	BEP52_RS18995	BJP78_RS19395	BJP74_RS18685	DFS55_RS05265	DBO90_RS18500	EX350_RS03330	FCV17_RS24055	FCV16_RS16590	FCV18_RS08095	JPH1_RS20900
MAV_RS20135	MAH_RS17725	BBJ32_RS04885	KV38_RS19470	BS641_RS21330	BEP52_RS18790	BJP78_RS19190	BJP74_RS18480	DFS55_RS05470	DBO90_RS18295	EX350_RS03535	FCV17_RS23815	FCV16_RS16355	FCV18_RS07855	JPH1_RS20695
MAV_RS07875	MAH_RS07150	BBJ32_RS01045	KV38_RS07520	BS641_RS15465	BEP52_RS07725	BJP78_RS07710	BJP74_RS07250	DFS55_RS17255	DBO90_RS13415	EX350_RS15010	FCV17_RS19380	FCV16_RS11920	FCV18_RS03410	JPH1_RS09470
MAV_RS06675	MAH_RS06160	BBJ32_RS02090	KV38_RS06415	BS641_RS07955	BEP52_RS06705	BJP78_RS06700	BJP74_RS06245	DFS55_RS18445	DBO90_RS14490	EX350_RS16150	FCV17_RS11625	FCV16_RS04165	FCV18_RS20485	JPH1_RS08035
MAV_RS08580	MAH_RS07825	BBJ32_RS00370	KV38_RS08335	BS641_RS14770	BEP52_RS08425	BJP78_RS08410	BJP74_RS07950	DFS55_RS16450	DBO90_RS12725	EX350_RS14305	FCV17_RS18680	FCV16_RS11220	FCV18_RS02710	JPH1_RS10165
MAV_RS10555	MAH_RS14095	BBJ32_RS19725	KV38_RS09500	BS641_RS13375	BEP52_RS15205	BJP78_RS15455	BJP74_RS10765	DFS55_RS15130	DBO90_RS11130	EX350_RS13055	FCV17_RS17530	FCV16_RS10070	FCV18_RS01560	JPH1_RS11400
MAV_RS09840	MAH_RS08280	BBJ32_RS19050	KV38_RS08805	BS641_RS14290	BEP52_RS08895	BJP78_RS08880	BJP74_RS08430	DFS55_RS16000	DBO90_RS11835	EX350_RS13780	FCV17_RS18235	FCV16_RS10775	FCV18_RS02265	JPH1_RS10660
MAV_RS05835	MAH_RS05340	BBJ32_RS02915	KV38_RS05565	BS641_RS07125	BEP52_RS05860	BJP78_RS05855	BJP74_RS05400	DFS55_RS19290	DBO90_RS15345	EX350_RS17005	FCV17_RS10730	FCV16_RS03270	FCV18_RS19580	JPH1_RS07180
MAV_RS11310	MAH_RS13495	BBJ32_RS20320	KV38_RS10330	BS641_RS12605	BEP52_RS14580	BJP78_RS14835	BJP74_RS11385	DFS55_RS14460	DBO90_RS09310	EX350_RS12320	FCV17_RS16930	FCV16_RS09470	FCV18_RS00960	JPH1_RS11995
MAV_RS14000	MAH_RS11590	BBJ32_RS22130	KV38_RS12200	BS641_RS10230	BEP52_RS12655	BJP78_RS12640	BJP74_RS13290	DFS55_RS12460	DBO90_RS07445	EX350_RS10260	FCV17_RS14945	FCV16_RS07485	FCV18_RS23820	JPH1_RS13965
MAV_RS11245	MAH_RS13555	BBJ32_RS20240	KV38_RS10265	BS641_RS12665	BEP52_RS14645	BJP78_RS14900	BJP74_RS11320	DFS55_RS14525	DBO90_RS10600	EX350_RS12380	FCV17_RS16995	FCV16_RS09535	FCV18_RS01025	JPH1_RS11935
MAV_RS01655	MAH_RS01520	BBJ32_RS10770	KV38_RS01450	BS641_RS01520	BEP52_RS01450	BJP78_RS01455	BJP74_RS01435	DFS55_RS23310	DBO90_RS04300	EX350_RS22225	FCV17_RS06425	FCV16_RS23145	FCV18_RS14630	JPH1_RS01465
MAV_RS10120	MAH_RS08550	BBJ32_RS19305	KV38_RS09070	BS641_RS13865	BEP52_RS09185	BJP78_RS09180	BJP74_RS08725	DFS55_RS15580	DBO90_RS11560	EX350_RS13505	FCV17_RS17970	FCV16_RS10510	FCV18_RS02000	JPH1_RS10940
MAV_RS13260	MAH_RS12310	BBJ32_RS21405	KV38_RS11490	BS641_RS10990	BEP52_RS13380	BJP78_RS13365	BJP74_RS12565	DFS55_RS13170	DBO90_RS08185	EX350_RS10990	FCV17_RS15700	FCV16_RS08240	FCV18_RS24580	JPH1_RS13195
MAV_RS06735	MAH_RS06220	BBJ32_RS02030	KV38_RS06475	BS641_RS08015	BEP52_RS06765	BJP78_RS06760	BJP74_RS06305	DFS55_RS18385	DBO90_RS14430	EX350_RS16090	FCV17_RS11685	FCV16_RS04225	FCV18_RS20545	JPH1_RS08095
MAV_RS20195	MAH_RS17785	BBJ32_RS04945	KV38_RS19530	BS641_RS21390	BEP52_RS18850	BJP78_RS19250	BJP74_RS18540	DFS55_RS05410	DBO90_RS18355	EX350_RS03475	FCV17_RS23910	FCV16_RS16450	FCV18_RS07950	JPH1_RS20755
MAV_RS15335	MAH_RS10310	BBJ32_RS18000	KV38_RS14000	BS641_RS16355	BEP52_RS10980	BJP78_RS10965	BJP74_RS14960	DFS55_RS10560	DBO90_RS06215	EX350_RS08330	FCV17_RS13210	FCV16_RS05750	FCV18_RS22060	JPH1_RS15905
MAV_RS05530	MAH_RS05035	BBJ32_RS03220	KV38_RS05260	BS641_RS06805	BEP52_RS05555	BJP78_RS05550	BJP74_RS05095	DFS55_RS19610	DBO90_RS15650	EX350_RS17310	FCV17_RS10425	FCV16_RS02965	FCV18_RS19275	JPH1_RS06840
MAV_RS02755	MAH_RS02460	BBJ32_RS12310	KV38_RS02535	BS641_RS02480	BEP52_RS02425	BJP78_RS02430	BJP74_RS02410	DFS55_RS22215	DBO90_RS00935	EX350_RS21235	FCV17_RS07390	FCV16_RS24110	FCV18_RS15595	JPH1_RS02440
MAV_RS20745	MAH_RS18325	BBJ32_RS05495	KV38_RS20090	BS641_RS21945	BEP52_RS19560	BJP78_RS19805	BJP74_RS19195	DFS55_RS04855	DBO90_RS18920	EX350_RS02900	FCV17_RS24465	FCV16_RS17000	FCV18_RS08505	JPH1_RS21320
MAV_RS06785	MAH_RS06270	BBJ32_RS01990	KV38_RS06525	BS641_RS08065	BEP52_RS06815	BJP78_RS06810	BJP74_RS06355	DFS55_RS18335	DBO90_RS14375	EX350_RS16040	FCV17_RS11735	FCV16_RS04275	FCV18_RS20595	JPH1_RS08145
MAV_RS20930	MAH_RS18515	BBJ32_RS05680	KV38_RS20275	BS641_RS22135	BEP52_RS19745	BJP78_RS19995	BJP74_RS19385	DFS55_RS04670	DBO90_RS19105	EX350_RS02705	FCV17_RS00450	FCV16_RS17190	FCV18_RS08695	JPH1_RS21515
MAV_RS06530	MAH_RS06010	BBJ32_RS02245	KV38_RS06265	BS641_RS07805	BEP52_RS06555	BJP78_RS06550	BJP74_RS06095	DFS55_RS18600	DBO90_RS14645	EX350_RS16305	FCV17_RS11475	FCV16_RS04015	FCV18_RS20335	JPH1_RS07885
MAV_RS18430	MAH_RS16035	BBJ32_RS14930	KV38_RS17190	BS641_RS19585	BEP52_RS17025	BJP78_RS17420	BJP74_RS16715	DFS55_RS07390	DBO90_RS02730	EX350_RS05265	FCV17_RS22085	FCV16_RS14620	FCV18_RS06120	JPH1_RS18970
MAV_RS18555	MAH_RS16160	BBJ32_RS14805	KV38_RS17315	BS641_RS19710	BEP52_RS17150	BJP78_RS17545	BJP74_RS16840	DFS55_RS07265	DBO90_RS02605	EX350_RS05135	FCV17_RS22210	FCV16_RS14745	FCV18_RS06245	JPH1_RS19095
MAV_RS01030	MAH_RS01115	BBJ32_RS11190	KV38_RS01020	BS641_RS01085	BEP52_RS01015	BJP78_RS01025	BJP74_RS01000	DFS55_RS23825	DBO90_RS03880	EX350_RS22760	FCV17_RS05965	FCV16_RS22685	FCV18_RS14170	JPH1_RS01025
MAV_RS24070	MAH_RS21675	BBJ32_RS08825	KV38_RS23540	BS641_RS25445	BEP52_RS22970	BJP78_RS23375	BJP74_RS22605	DFS55_RS01380	DBO90_RS22305	EX350_RS25010	FCV17_RS03780	FCV16_RS20520	FCV18_RS12010	JPH1_RS24840
MAV_RS06830	MAH_RS06315	BBJ32_RS01945	KV38_RS06570	BS641_RS08115	BEP52_RS06860	BJP78_RS06860	BJP74_RS06400	DFS55_RS18290	DBO90_RS14330	EX350_RS15995	FCV17_RS11780	FCV16_RS04320	FCV18_RS20640	JPH1_RS08190
MAV_RS17880	MAH_RS15425	BBJ32_RS15390	KV38_RS16555	BS641_RS19105	BEP52_RS16545	BJP78_RS16800	BJP74_RS16235	DFS55_RS08020	DBO90_RS10325	EX350_RS05775	FCV17_RS21605	FCV16_RS14145	FCV18_RS05640	JPH1_RS18495
MAV_RS07755	MAH_RS07030	BBJ32_RS01210	KV38_RS07380	BS641_RS15590	BEP52_RS07600	BJP78_RS07585	BJP74_RS07125	DFS55_RS17380	DBO90_RS13585	EX350_RS15135	FCV17_RS19505	FCV16_RS12045	FCV18_RS03535	JPH1_RS09345
MAV_RS23390	MAH_RS20995	BBJ32_RS08140	KV38_RS22840	BS641_RS24750	BEP52_RS22300	BJP78_RS22700	BJP74_RS21940	DFS55_RS02085	DBO90_RS21605	EX350_RS00025	FCV17_RS03080	FCV16_RS19820	FCV18_RS11310	JPH1_RS24135
MAV_RS22230	MAH_RS19835	BBJ32_RS06980	KV38_RS21635	BS641_RS23480	BEP52_RS21090	BJP78_RS21485	BJP74_RS20725	DFS55_RS03310	DBO90_RS20415	EX350_RS01300	FCV17_RS01805	FCV16_RS18545	FCV18_RS10050	JPH1_RS22850
MAV_RS17440	MAH_RS14960	BBJ32_RS15820	KV38_RS16110	BS641_RS18665	BEP52_RS16060	BJP78_RS16310	BJP74_RS15750	DFS55_RS08465	DBO90_RS09880	EX350_RS06220	FCV17_RS21155	FCV16_RS13695	FCV18_RS05190	JPH1_RS18045
MAV_RS07390	MAH_RS06645	BBJ32_RS01605	KV38_RS06975	BS641_RS15955	BEP52_RS07195	BJP78_RS07195	BJP74_RS06735	DFS55_RS17775	DBO90_RS13975	EX350_RS15505	FCV17_RS19870	FCV16_RS12410	FCV18_RS03905	JPH1_RS08975
MAV_RS07240	MAH_RS06495	BBJ32_RS01755	KV38_RS06810	BS641_RS16130	BEP52_RS07045	BJP78_RS07045	BJP74_RS06585	DFS55_RS17950	DBO90_RS14125	EX350_RS15670	FCV17_RS20020	FCV16_RS12560	FCV18_RS04055	JPH1_RS08825
MAV_RS10495	MAH_RS14155	BBJ32_RS19665	KV38_RS09440	BS641_RS13435	BEP52_RS15265	BJP78_RS15515	BJP74_RS10705	DFS55_RS15190	DBO90_RS11190	EX350_RS13115	FCV17_RS17590	FCV16_RS10130	FCV18_RS01620	JPH1_RS11340
MAV_RS23780	MAH_RS21385	BBJ32_RS08535	KV38_RS23240	BS641_RS25150	BEP52_RS22705	BJP78_RS23110	BJP74_RS22340	DFS55_RS01680	DBO90_RS22010	EX350_RS25305	FCV17_RS03485	FCV16_RS20225	FCV18_RS11715	JPH1_RS24540
MAV_RS06835	MAH_RS06320	BBJ32_RS01940	KV38_RS06575	BS641_RS08120	BEP52_RS06865	BJP78_RS06865	BJP74_RS06405	DFS55_RS18285	DBO90_RS14325	EX350_RS15990	FCV17_RS11785	FCV16_RS04325	FCV18_RS20645	JPH1_RS08195
MAV_RS06435	MAH_RS05910	BBJ32_RS02340	KV38_RS06165	BS641_RS07705	BEP52_RS06455	BJP78_RS06450	BJP74_RS05995	DFS55_RS18700	DBO90_RS14745	EX350_RS16405	FCV17_RS11375	FCV16_RS03915	FCV18_RS20235	JPH1_RS07785
MAV_RS06725	MAH_RS06210	BBJ32_RS02040	KV38_RS06465	BS641_RS08005	BEP52_RS06755	BJP78_RS06750	BJP74_RS06295	DFS55_RS18395	DBO90_RS14440	EX350_RS16100	FCV17_RS11675	FCV16_RS04215	FCV18_RS20535	JPH1_RS08085
MAV_RS08065	MAH_RS07330	BBJ32_RS00865	KV38_RS07825	BS641_RS15275	BEP52_RS07920	BJP78_RS07905	BJP74_RS07445	DFS55_RS16965	DBO90_RS13230	EX350_RS14815	FCV17_RS19190	FCV16_RS11730	FCV18_RS03220	JPH1_RS09660
MAV_RS13815	MAH_RS11775	BBJ32_RS21960	KV38_RS12010	BS641_RS10410	BEP52_RS12835	BJP78_RS12820	BJP74_RS13110	DFS55_RS12655	DBO90_RS07615	EX350_RS10430	FCV17_RS15150	FCV16_RS07690	FCV18_RS24025	JPH1_RS13760
MAV_RS15280	MAH_RS10355	BBJ32_RS18055	KV38_RS13945	BS641_RS16300	BEP52_RS11035	BJP78_RS11020	BJP74_RS14905	DFS55_RS10615	DBO90_RS06270	EX350_RS08385	FCV17_RS13265	FCV16_RS05805	FCV18_RS22115	JPH1_RS15850
MAV_RS22080	MAH_RS19685	BBJ32_RS06830	KV38_RS21480	BS641_RS23330	BEP52_RS20935	BJP78_RS21330	BJP74_RS20570	DFS55_RS03465	DBO90_RS20260	EX350_RS01455	FCV17_RS01650	FCV16_RS18390	FCV18_RS09895	JPH1_RS22695
MAV_RS17240	MAH_RS14765	BBJ32_RS16015	KV38_RS15910	BS641_RS18465	BEP52_RS15860	BJP78_RS16110	BJP74_RS15550	DFS55_RS08665	DBO90_RS09675	EX350_RS06420	FCV17_RS20955	FCV16_RS13495	FCV18_RS04990	JPH1_RS17845
MAV_RS17200	MAH_RS14725	BBJ32_RS16055	KV38_RS15870	BS641_RS18430	BEP52_RS15820	BJP78_RS16070	BJP74_RS15510	DFS55_RS08705	DBO90_RS09635	EX350_RS06460	FCV17_RS20920	FCV16_RS13460	FCV18_RS04955	JPH1_RS17810
MAV_RS06600	MAH_RS06085	BBJ32_RS02170	KV38_RS06340	BS641_RS07880	BEP52_RS06630	BJP78_RS06625	BJP74_RS06170	DFS55_RS18525	DBO90_RS14570	EX350_RS16230	FCV17_RS11550	FCV16_RS04090	FCV18_RS20410	JPH1_RS07960
MAV_RS00755	MAH_RS00840	BBJ32_RS11465	KV38_RS00740	BS641_RS00795	BEP52_RS00740	BJP78_RS00750	BJP74_RS00725	DFS55_RS24100	DBO90_RS03600	EX350_RS23035	FCV17_RS05690	FCV16_RS22405	FCV18_RS13895	JPH1_RS00750
MAV_RS06870	MAH_RS06355	BBJ32_RS01900	KV38_RS06610	BS641_RS08155	BEP52_RS06900	BJP78_RS06900	BJP74_RS06440	DFS55_RS18250	DBO90_RS14280	EX350_RS15955	FCV17_RS11820	FCV16_RS04360	FCV18_RS20680	JPH1_RS08230
MAV_RS25415	MAH_RS22645	BBJ32_RS09810	KV38_RS24505	BS641_RS26415	BEP52_RS23980	BJP78_RS24385	BJP74_RS23615	DFS55_RS24500	DBO90_RS23335	EX350_RS24045	FCV17_RS04770	FCV16_RS21485	FCV18_RS12975	JPH1_RS25795
MAV_RS23245	MAH_RS20850	BBJ32_RS07995	KV38_RS22690	BS641_RS24600	BEP52_RS22150	BJP78_RS22550	BJP74_RS21790	DFS55_RS02235	DBO90_RS21455	EX350_RS00175	FCV17_RS02920	FCV16_RS19660	FCV18_RS11160	JPH1_RS23985
MAV_RS13020	MAH_RS12555	BBJ32_RS21140	KV38_RS11240	BS641_RS11235	BEP52_RS13630	BJP78_RS13615	BJP74_RS12310	DFS55_RS13420	DBO90_RS08455	EX350_RS11240	FCV17_RS15950	FCV16_RS08490	FCV18_RS24830	JPH1_RS12945
MAV_RS05250	MAH_RS04670	BBJ32_RS03560	KV38_RS04880	BS641_RS06450	BEP52_RS05195	BJP78_RS05190	BJP74_RS04735	DFS55_RS19980	DBO90_RS16000	EX350_RS17690	FCV17_RS10135	FCV16_RS02670	FCV18_RS18890	JPH1_RS06485
MAV_RS14870	MAH_RS10775	BBJ32_RS00080	KV38_RS13515	BS641_RS08740	BEP52_RS11470	BJP78_RS11455	BJP74_RS14470	DFS55_RS11045	DBO90_RS06715	EX350_RS08825	FCV17_RS13695	FCV16_RS06235	FCV18_RS22545	JPH1_RS15415
MAV_RS13075	MAH_RS12495	BBJ32_RS21205	KV38_RS11300	BS641_RS11175	BEP52_RS13570	BJP78_RS13555	BJP74_RS12375	DFS55_RS13360	DBO90_RS08395	EX350_RS11180	FCV17_RS15890	FCV16_RS08430	FCV18_RS24770	JPH1_RS13005
MAV_RS19195	MAH_RS16800	BBJ32_RS03930	KV38_RS18415	BS641_RS20395	BEP52_RS17800	BJP78_RS18200	BJP74_RS17490	DFS55_RS06620	DBO90_RS01900	EX350_RS04475	FCV17_RS22875	FCV16_RS15410	FCV18_RS06910	JPH1_RS19755
MAV_RS06065	MAH_RS05540	BBJ32_RS02715	KV38_RS05775	BS641_RS07330	BEP52_RS06070	BJP78_RS06065	BJP74_RS05610	DFS55_RS19085	DBO90_RS15130	EX350_RS16795	FCV17_RS10985	FCV16_RS03525	FCV18_RS19835	JPH1_RS07395
MAV_RS20075	MAH_RS17665	BBJ32_RS04820	KV38_RS19405	BS641_RS21265	BEP52_RS18725	BJP78_RS19125	BJP74_RS18415	DFS55_RS05535	DBO90_RS18230	EX350_RS03600	FCV17_RS23745	FCV16_RS16290	FCV18_RS07790	JPH1_RS20630
MAV_RS10380	MAH_RS14270	BBJ32_RS19550	KV38_RS09325	BS641_RS13550	BEP52_RS15380	BJP78_RS15630	BJP74_RS10590	DFS55_RS15305	DBO90_RS11305	EX350_RS13230	FCV17_RS17705	FCV16_RS10245	FCV18_RS01735	JPH1_RS11225
MAV_RS06885	MAH_RS06370	BBJ32_RS01885	KV38_RS06625	BS641_RS08170	BEP52_RS06915	BJP78_RS06915	BJP74_RS06455	DFS55_RS18235	DBO90_RS14265	EX350_RS15940	FCV17_RS11835	FCV16_RS04375	FCV18_RS20695	JPH1_RS08245
MAV_RS18085	MAH_RS15630	BBJ32_RS15185	KV38_RS16770	BS641_RS19315	BEP52_RS16760	BJP78_RS17015	BJP74_RS16450	DFS55_RS07805	DBO90_RS02990	EX350_RS05555	FCV17_RS21820	FCV16_RS14355	FCV18_RS05855	JPH1_RS18705
MAV_RS11155	MAH_RS13665	BBJ32_RS20150	KV38_RS09950	BS641_RS12915	BEP52_RS14760	BJP78_RS15010	BJP74_RS11210	DFS55_RS14690	DBO90_RS10690	EX350_RS12610	FCV17_RS17085	FCV16_RS09625	FCV18_RS01115	JPH1_RS11845
MAV_RS02820	MAH_RS02525	BBJ32_RS12375	KV38_RS02600	BS641_RS02545	BEP52_RS02490	BJP78_RS02495	BJP74_RS02475	DFS55_RS22150	DBO90_RS01000	EX350_RS21170	FCV17_RS07455	FCV16_RS24175	FCV18_RS15660	JPH1_RS02505
MAV_RS16570	MAH_RS09115	BBJ32_RS16790	KV38_RS15265	BS641_RS17785	BEP52_RS09750	BJP78_RS09745	BJP74_RS09300	DFS55_RS09310	DBO90_RS03435	EX350_RS07105	FCV17_RS20280	FCV16_RS12820	FCV18_RS04315	JPH1_RS17165
MAV_RS22685	MAH_RS20295	BBJ32_RS07435	KV38_RS22125	BS641_RS23995	BEP52_RS21580	BJP78_RS21980	BJP74_RS21215	DFS55_RS02810	DBO90_RS20890	EX350_RS00810	FCV17_RS02320	FCV16_RS19060	FCV18_RS10560	JPH1_RS23360
MAV_RS20455	MAH_RS18045	BBJ32_RS05210	KV38_RS19795	BS641_RS21655	BEP52_RS19115	BJP78_RS19515	BJP74_RS18805	DFS55_RS05145	DBO90_RS18625	EX350_RS03210	FCV17_RS24175	FCV16_RS16710	FCV18_RS08215	JPH1_RS21020
MAV_RS22775	MAH_RS20385	BBJ32_RS07525	KV38_RS22215	BS641_RS24085	BEP52_RS21670	BJP78_RS22070	BJP74_RS21305	DFS55_RS02710	DBO90_RS20980	EX350_RS00720	FCV17_RS02410	FCV16_RS19150	FCV18_RS10650	JPH1_RS23450
MAV_RS08245	MAH_RS07495	BBJ32_RS00700	KV38_RS07995	BS641_RS15105	BEP52_RS08085	BJP78_RS08070	BJP74_RS07610	DFS55_RS16790	DBO90_RS13065	EX350_RS14645	FCV17_RS19020	FCV16_RS11560	FCV18_RS03050	JPH1_RS09830
MAV_RS14515	MAH_RS11100	BBJ32_RS22560	KV38_RS12710	BS641_RS09725	BEP52_RS12165	BJP78_RS12150	BJP74_RS13780	DFS55_RS11950	DBO90_RS07015	EX350_RS09780	FCV17_RS14420	FCV16_RS06960	FCV18_RS23560	JPH1_RS14455
MAV_RS03695	MAH_RS03340	BBJ32_RS13190	KV38_RS03415	BS641_RS03715	BEP52_RS03315	BJP78_RS03320	BJP74_RS03290	DFS55_RS21330	DBO90_RS17410	EX350_RS20355	FCV17_RS08270	FCV16_RS24990	FCV18_RS16475	JPH1_RS03320
MAV_RS06915	MAH_RS06400	BBJ32_RS01855	KV38_RS06655	BS641_RS08200	BEP52_RS06945	BJP78_RS06945	BJP74_RS06485	DFS55_RS18205	DBO90_RS14235	EX350_RS15910	FCV17_RS11865	FCV16_RS04405	FCV18_RS20725	JPH1_RS08275
MAV_RS06280	MAH_RS05755	BBJ32_RS02495	KV38_RS06010	BS641_RS07550	BEP52_RS06300	BJP78_RS06295	BJP74_RS05840	DFS55_RS18855	DBO90_RS14900	EX350_RS16560	FCV17_RS11220	FCV16_RS03760	FCV18_RS20070	JPH1_RS07630
MAV_RS19875	MAH_RS17465	BBJ32_RS04615	KV38_RS19200	BS641_RS21065	BEP52_RS18520	BJP78_RS18920	BJP74_RS18210	DFS55_RS05740	DBO90_RS18015	EX350_RS03805	FCV17_RS23540	FCV16_RS16085	FCV18_RS07585	JPH1_RS20425
MAV_RS22075	MAH_RS19680	BBJ32_RS06825	KV38_RS21475	BS641_RS23325	BEP52_RS20930	BJP78_RS21325	BJP74_RS20565	DFS55_RS03470	DBO90_RS20255	EX350_RS01460	FCV17_RS01645	FCV16_RS18385	FCV18_RS09890	JPH1_RS22690
MAV_RS13755	MAH_RS11835	BBJ32_RS21900	KV38_RS11950	BS641_RS10470	BEP52_RS12895	BJP78_RS12880	BJP74_RS13050	DFS55_RS12715	DBO90_RS07675	EX350_RS10490	FCV17_RS15210	FCV16_RS07750	FCV18_RS24085	JPH1_RS13700
MAV_RS07345	MAH_RS06600	BBJ32_RS01650	KV38_RS06930	BS641_RS16020	BEP52_RS07150	BJP78_RS07150	BJP74_RS06690	DFS55_RS17820	DBO90_RS14020	EX350_RS15550	FCV17_RS19915	FCV16_RS12455	FCV18_RS03950	JPH1_RS08930
MAV_RS23495	MAH_RS21100	BBJ32_RS08245	KV38_RS22945	BS641_RS24855	BEP52_RS22405	BJP78_RS22810	BJP74_RS22045	DFS55_RS01980	DBO90_RS21710	EX350_RS25605	FCV17_RS03185	FCV16_RS19925	FCV18_RS11415	JPH1_RS24240
MAV_RS02050	MAH_RS01925	BBJ32_RS10370	KV38_RS01980	BS641_RS01925	BEP52_RS01870	BJP78_RS01875	BJP74_RS01855	DFS55_RS22780	DBO90_RS04700	EX350_RS21800	FCV17_RS06835	FCV16_RS23555	FCV18_RS15040	JPH1_RS01875
MAV_RS08560	MAH_RS07810	BBJ32_RS00385	KV38_RS08315	BS641_RS14790	BEP52_RS08405	BJP78_RS08390	BJP74_RS07930	DFS55_RS16470	DBO90_RS12745	EX350_RS14325	FCV17_RS18700	FCV16_RS11240	FCV18_RS02730	JPH1_RS10145
MAV_RS16210	MAH_RS09480	BBJ32_RS17175	KV38_RS14900	BS641_RS17245	BEP52_RS10135	BJP78_RS10120	BJP74_RS09835	DFS55_RS09670	DBO90_RS05350	EX350_RS07515	FCV17_RS12365	FCV16_RS04905	FCV18_RS21225	JPH1_RS16730
MAV_RS15795	MAH_RS09875	BBJ32_RS17570	KV38_RS14500	BS641_RS16830	BEP52_RS10535	BJP78_RS10520	BJP74_RS10245	DFS55_RS10080	DBO90_RS05750	EX350_RS07910	FCV17_RS12755	FCV16_RS05300	FCV18_RS21620	JPH1_RS16320
MAV_RS22285	MAH_RS19890	BBJ32_RS07035	KV38_RS21695	BS641_RS23540	BEP52_RS21150	BJP78_RS21545	BJP74_RS20785	DFS55_RS03250	DBO90_RS20475	EX350_RS01240	FCV17_RS01865	FCV16_RS18605	FCV18_RS10110	JPH1_RS22910
MAV_RS19290	MAH_RS16890	BBJ32_RS04025	KV38_RS18510	BS641_RS20490	BEP52_RS17895	BJP78_RS18295	BJP74_RS17585	DFS55_RS06525	DBO90_RS01805	EX350_RS04380	FCV17_RS22970	FCV16_RS15505	FCV18_RS07005	JPH1_RS19850
MAV_RS04260	MAH_RS03625	BBJ32_RS13470	KV38_RS03825	BS641_RS05450	BEP52_RS03695	BJP78_RS03695	BJP74_RS03665	DFS55_RS20980	DBO90_RS17010	EX350_RS18695	FCV17_RS09125	FCV16_RS01660	FCV18_RS17885	JPH1_RS05470
MAV_RS17135	MAH_RS14665	BBJ32_RS16115	KV38_RS15810	BS641_RS18370	BEP52_RS15760	BJP78_RS16010	BJP74_RS15450	DFS55_RS08765	DBO90_RS09575	EX350_RS06520	FCV17_RS20860	FCV16_RS13400	FCV18_RS04895	JPH1_RS17750
MAV_RS15900	MAH_RS09770	BBJ32_RS17465	KV38_RS14605	BS641_RS16935	BEP52_RS10430	BJP78_RS10415	BJP74_RS10140	DFS55_RS09975	DBO90_RS05645	EX350_RS07805	FCV17_RS12650	FCV16_RS05195	FCV18_RS21515	JPH1_RS16425
MAV_RS05340	MAH_RS04795	BBJ32_RS03465	KV38_RS05015	BS641_RS06550	BEP52_RS05310	BJP78_RS05305	BJP74_RS04850	DFS55_RS19865	DBO90_RS15895	EX350_RS17555	FCV17_RS10275	FCV16_RS02815	FCV18_RS19030	JPH1_RS06595
MAV_RS00030	MAH_RS00025	BBJ32_RS09910	KV38_RS00030	BS641_RS00025	BEP52_RS00025	BJP78_RS00025	BJP74_RS00025	DFS55_RS00025	DBO90_RS00025	EX350_RS23940	FCV17_RS04875	FCV16_RS21590	FCV18_RS13080	JPH1_RS00025
MAV_RS20260	MAH_RS17850	BBJ32_RS05010	KV38_RS19595	BS641_RS21455	BEP52_RS18915	BJP78_RS19315	BJP74_RS18605	DFS55_RS05345	DBO90_RS18420	EX350_RS03410	FCV17_RS23975	FCV16_RS16515	FCV18_RS08015	JPH1_RS20820
MAV_RS01140	MAH_RS01225	BBJ32_RS11080	KV38_RS01130	BS641_RS01210	BEP52_RS01130	BJP78_RS01140	BJP74_RS01115	DFS55_RS23710	DBO90_RS03995	EX350_RS22645	FCV17_RS06080	FCV16_RS22800	FCV18_RS14285	JPH1_RS01140
MAV_RS21760	MAH_RS19345	BBJ32_RS06510	KV38_RS21135	BS641_RS22990	BEP52_RS20585	BJP78_RS20985	BJP74_RS20225	DFS55_RS03810	DBO90_RS19940	EX350_RS01815	FCV17_RS01330	FCV16_RS18070	FCV18_RS09575	JPH1_RS22375
MAV_RS07945	MAH_RS07220	BBJ32_RS00975	KV38_RS07710	BS641_RS15390	BEP52_RS07805	BJP78_RS07790	BJP74_RS07330	DFS55_RS17080	DBO90_RS13340	EX350_RS14935	FCV17_RS19305	FCV16_RS11845	FCV18_RS03335	JPH1_RS09545
MAV_RS03215	MAH_RS02920	BBJ32_RS12770	KV38_RS02995	BS641_RS03285	BEP52_RS02895	BJP78_RS02900	BJP74_RS02870	DFS55_RS21755	DBO90_RS01395	EX350_RS20775	FCV17_RS07855	FCV16_RS24575	FCV18_RS16060	JPH1_RS02900
MAV_RS07825	MAH_RS07100	BBJ32_RS01095	KV38_RS07470	BS641_RS15515	BEP52_RS07675	BJP78_RS07660	BJP74_RS07200	DFS55_RS17305	DBO90_RS13465	EX350_RS15060	FCV17_RS19430	FCV16_RS11970	FCV18_RS03460	JPH1_RS09420
MAV_RS10345	MAH_RS14305	BBJ32_RS19520	KV38_RS09290	BS641_RS13585	BEP52_RS15415	BJP78_RS15665	BJP74_RS10555	DFS55_RS15340	DBO90_RS11340	EX350_RS13285	FCV17_RS17740	FCV16_RS10280	FCV18_RS01770	JPH1_RS11190
MAV_RS18475	MAH_RS16080	BBJ32_RS14885	KV38_RS17235	BS641_RS19630	BEP52_RS17070	BJP78_RS17465	BJP74_RS16760	DFS55_RS07345	DBO90_RS02685	EX350_RS05215	FCV17_RS22130	FCV16_RS14665	FCV18_RS06165	JPH1_RS19015
MAV_RS11150	MAH_RS13670	BBJ32_RS20145	KV38_RS09940	BS641_RS12920	BEP52_RS14770	BJP78_RS15020	BJP74_RS11200	DFS55_RS14700	DBO90_RS10700	EX350_RS12620	FCV17_RS17095	FCV16_RS09635	FCV18_RS01125	JPH1_RS11835
MAV_RS17280	MAH_RS14805	BBJ32_RS15975	KV38_RS15950	BS641_RS18505	BEP52_RS15900	BJP78_RS16150	BJP74_RS15590	DFS55_RS08625	DBO90_RS09715	EX350_RS06380	FCV17_RS20995	FCV16_RS13535	FCV18_RS05030	JPH1_RS17885
MAV_RS19965	MAH_RS17555	BBJ32_RS04705	KV38_RS19290	BS641_RS21155	BEP52_RS18610	BJP78_RS19010	BJP74_RS18300	DFS55_RS05650	DBO90_RS18105	EX350_RS03715	FCV17_RS23630	FCV16_RS16175	FCV18_RS07675	JPH1_RS20515
MAV_RS25235	MAH_RS22460	BBJ32_RS09625	KV38_RS24310	BS641_RS26215	BEP52_RS23780	BJP78_RS24185	BJP74_RS23415	DFS55_RS00610	DBO90_RS23135	EX350_RS24240	FCV17_RS04580	FCV16_RS21295	FCV18_RS12785	JPH1_RS25605
MAV_RS00520	MAH_RS00635	BBJ32_RS11695	KV38_RS00535	BS641_RS00550	BEP52_RS00535	BJP78_RS00545	BJP74_RS00520	DFS55_RS24330	DBO90_RS00540	EX350_RS23240	FCV17_RS05485	FCV16_RS22200	FCV18_RS13690	JPH1_RS00545
MAV_RS24610	MAH_RS21800	BBJ32_RS08980	KV38_RS23665	BS641_RS25570	BEP52_RS23095	BJP78_RS23500	BJP74_RS22730	DFS55_RS01255	DBO90_RS22465	EX350_RS24885	FCV17_RS03905	FCV16_RS20645	FCV18_RS12135	JPH1_RS24965
MAV_RS07990	MAH_RS07265	BBJ32_RS00930	KV38_RS07755	BS641_RS15345	BEP52_RS07850	BJP78_RS07835	BJP74_RS07375	DFS55_RS17035	DBO90_RS13295	EX350_RS14890	FCV17_RS19260	FCV16_RS11800	FCV18_RS03290	JPH1_RS09590
MAV_RS00655	MAH_RS00740	BBJ32_RS11565	KV38_RS00640	BS641_RS00690	BEP52_RS00640	BJP78_RS00650	BJP74_RS00625	DFS55_RS24200	DBO90_RS00670	EX350_RS23135	FCV17_RS05590	FCV16_RS22305	FCV18_RS13795	JPH1_RS00650
MAV_RS20900	MAH_RS18485	BBJ32_RS05650	KV38_RS20245	BS641_RS22105	BEP52_RS19715	BJP78_RS19965	BJP74_RS19355	DFS55_RS04700	DBO90_RS19075	EX350_RS02740	FCV17_RS00420	FCV16_RS17160	FCV18_RS08665	JPH1_RS21480
MAV_RS11295	MAH_RS13510	BBJ32_RS20305	KV38_RS10315	BS641_RS12620	BEP52_RS14595	BJP78_RS14850	BJP74_RS11370	DFS55_RS14475	DBO90_RS09325	EX350_RS12335	FCV17_RS16945	FCV16_RS09485	FCV18_RS00975	JPH1_RS11980
MAV_RS16195	MAH_RS09495	BBJ32_RS17190	KV38_RS14885	BS641_RS17230	BEP52_RS10150	BJP78_RS10135	BJP74_RS09850	DFS55_RS09685	DBO90_RS05365	EX350_RS07530	FCV17_RS12380	FCV16_RS04920	FCV18_RS21240	JPH1_RS16715
MAV_RS00765	MAH_RS00850	BBJ32_RS11455	KV38_RS00750	BS641_RS00805	BEP52_RS00750	BJP78_RS00760	BJP74_RS00735	DFS55_RS24090	DBO90_RS03610	EX350_RS23025	FCV17_RS05700	FCV16_RS22415	FCV18_RS13905	JPH1_RS00760
MAV_RS21525	MAH_RS19110	BBJ32_RS06275	KV38_RS20880	BS641_RS22755	BEP52_RS20350	BJP78_RS20750	BJP74_RS19990	DFS55_RS04065	DBO90_RS19705	EX350_RS02070	FCV17_RS01075	FCV16_RS17815	FCV18_RS09320	JPH1_RS22140
MAV_RS17605	MAH_RS15155	BBJ32_RS15660	KV38_RS16280	BS641_RS18830	BEP52_RS16270	BJP78_RS16520	BJP74_RS15960	DFS55_RS08295	DBO90_RS10045	EX350_RS06055	FCV17_RS21320	FCV16_RS13860	FCV18_RS05355	JPH1_RS18215
MAV_RS20110	MAH_RS17700	BBJ32_RS04860	KV38_RS19445	BS641_RS21305	BEP52_RS18765	BJP78_RS19165	BJP74_RS18455	DFS55_RS05495	DBO90_RS18270	EX350_RS03560	FCV17_RS23785	FCV16_RS16330	FCV18_RS07830	JPH1_RS20670
MAV_RS22765	MAH_RS20375	BBJ32_RS07515	KV38_RS22205	BS641_RS24075	BEP52_RS21660	BJP78_RS22060	BJP74_RS21295	DFS55_RS02720	DBO90_RS20970	EX350_RS00730	FCV17_RS02400	FCV16_RS19140	FCV18_RS10640	JPH1_RS23440
MAV_RS11110	MAH_RS13710	BBJ32_RS20105	KV38_RS09900	BS641_RS12960	BEP52_RS14815	BJP78_RS15065	BJP74_RS11155	DFS55_RS14740	DBO90_RS10740	EX350_RS12660	FCV17_RS17135	FCV16_RS09675	FCV18_RS01165	JPH1_RS11795
MAV_RS23075	MAH_RS20685	BBJ32_RS07825	KV38_RS22520	BS641_RS24390	BEP52_RS21975	BJP78_RS22375	BJP74_RS21610	DFS55_RS02405	DBO90_RS21285	EX350_RS00390	FCV17_RS02715	FCV16_RS19455	FCV18_RS10955	JPH1_RS23775
MAV_RS19570	MAH_RS17180	BBJ32_RS04305	KV38_RS18790	BS641_RS20770	BEP52_RS18180	BJP78_RS18580	BJP74_RS17870	DFS55_RS06245	DBO90_RS17715	EX350_RS04100	FCV17_RS23260	FCV16_RS15795	FCV18_RS07295	JPH1_RS20130
MAV_RS17565	MAH_RS15115	BBJ32_RS15700	KV38_RS16240	BS641_RS18790	BEP52_RS16230	BJP78_RS16480	BJP74_RS15920	DFS55_RS08335	DBO90_RS10005	EX350_RS06095	FCV17_RS21280	FCV16_RS13820	FCV18_RS05315	JPH1_RS18175
MAV_RS16755	MAH_RS08930	BBJ32_RS16605	KV38_RS15450	BS641_RS17970	BEP52_RS09560	BJP78_RS09555	BJP74_RS09110	DFS55_RS09125	DBO90_RS03250	EX350_RS06920	FCV17_RS20465	FCV16_RS13005	FCV18_RS04500	JPH1_RS17355
MAV_RS04145	MAH_RS03500	BBJ32_RS13355	KV38_RS03710	BS641_RS05335	BEP52_RS03580	BJP78_RS03580	BJP74_RS03550	DFS55_RS21095	DBO90_RS17125	EX350_RS18810	FCV17_RS09010	FCV16_RS01545	FCV18_RS17770	JPH1_RS05355
MAV_RS17015	MAH_RS14550	BBJ32_RS16225	KV38_RS15700	BS641_RS18260	BEP52_RS15650	BJP78_RS15900	BJP74_RS15340	DFS55_RS08875	DBO90_RS09465	EX350_RS06635	FCV17_RS20750	FCV16_RS13290	FCV18_RS04785	JPH1_RS17635
MAV_RS20290	MAH_RS17880	BBJ32_RS05040	KV38_RS19630	BS641_RS21490	BEP52_RS18950	BJP78_RS19350	BJP74_RS18640	DFS55_RS05310	DBO90_RS18455	EX350_RS03375	FCV17_RS24010	FCV16_RS16550	FCV18_RS08050	JPH1_RS20855
MAV_RS23430	MAH_RS21035	BBJ32_RS08180	KV38_RS22880	BS641_RS24790	BEP52_RS22340	BJP78_RS22745	BJP74_RS21980	DFS55_RS02045	DBO90_RS21645	EX350_RS25670	FCV17_RS03120	FCV16_RS19860	FCV18_RS11350	JPH1_RS24175
MAV_RS04730	MAH_RS04150	BBJ32_RS13940	KV38_RS04350	BS641_RS05925	BEP52_RS04220	BJP78_RS04225	BJP74_RS04190	DFS55_RS20505	DBO90_RS16540	EX350_RS18220	FCV17_RS09600	FCV16_RS02135	FCV18_RS18360	JPH1_RS05955
MAV_RS03070	MAH_RS02775	BBJ32_RS12625	KV38_RS02850	BS641_RS02820	BEP52_RS02750	BJP78_RS02755	BJP74_RS02725	DFS55_RS21900	DBO90_RS01250	EX350_RS20920	FCV17_RS07705	FCV16_RS24425	FCV18_RS15910	JPH1_RS02755
MAV_RS13245	MAH_RS12325	BBJ32_RS21390	KV38_RS11475	BS641_RS11005	BEP52_RS13395	BJP78_RS13380	BJP74_RS12550	DFS55_RS13185	DBO90_RS08200	EX350_RS11005	FCV17_RS15715	FCV16_RS08255	FCV18_RS24595	JPH1_RS13180
MAV_RS02880	MAH_RS02585	BBJ32_RS12435	KV38_RS02660	BS641_RS02605	BEP52_RS02550	BJP78_RS02555	BJP74_RS02535	DFS55_RS22090	DBO90_RS01060	EX350_RS21110	FCV17_RS07515	FCV16_RS24235	FCV18_RS15720	JPH1_RS02565
MAV_RS18020	MAH_RS15565	BBJ32_RS15250	KV38_RS16705	BS641_RS19250	BEP52_RS16695	BJP78_RS16950	BJP74_RS16385	DFS55_RS07870	DBO90_RS03055	EX350_RS05625	FCV17_RS21755	FCV16_RS14295	FCV18_RS05790	JPH1_RS18640
MAV_RS24635	MAH_RS21825	BBJ32_RS09005	KV38_RS23690	BS641_RS25595	BEP52_RS23120	BJP78_RS23525	BJP74_RS22755	DFS55_RS01230	DBO90_RS22490	EX350_RS24860	FCV17_RS03930	FCV16_RS20670	FCV18_RS12160	JPH1_RS24990
MAV_RS02665	MAH_RS02370	BBJ32_RS12220	KV38_RS02445	BS641_RS02390	BEP52_RS02335	BJP78_RS02340	BJP74_RS02320	DFS55_RS22305	DBO90_RS00845	EX350_RS21325	FCV17_RS07300	FCV16_RS24020	FCV18_RS15505	JPH1_RS02350
MAV_RS18270	MAH_RS15875	BBJ32_RS15090	KV38_RS17025	BS641_RS19420	BEP52_RS16855	BJP78_RS17255	BJP74_RS16545	DFS55_RS07555	DBO90_RS02895	EX350_RS05440	FCV17_RS21920	FCV16_RS14455	FCV18_RS05955	JPH1_RS18805
MAV_RS13990	MAH_RS11600	BBJ32_RS22120	KV38_RS12190	BS641_RS10240	BEP52_RS12665	BJP78_RS12650	BJP74_RS13280	DFS55_RS12470	DBO90_RS07455	EX350_RS10270	FCV17_RS14955	FCV16_RS07495	FCV18_RS23830	JPH1_RS13955
MAV_RS18005	MAH_RS15550	BBJ32_RS15265	KV38_RS16690	BS641_RS19235	BEP52_RS16680	BJP78_RS16935	BJP74_RS16370	DFS55_RS07885	DBO90_RS03070	EX350_RS05640	FCV17_RS21740	FCV16_RS14280	FCV18_RS05775	JPH1_RS18625
MAV_RS04475	MAH_RS03840	BBJ32_RS13685	KV38_RS04045	BS641_RS05670	BEP52_RS03915	BJP78_RS03915	BJP74_RS03885	DFS55_RS20760	DBO90_RS16790	EX350_RS18475	FCV17_RS09345	FCV16_RS01880	FCV18_RS18105	JPH1_RS05690
MAV_RS22990	MAH_RS20600	BBJ32_RS07740	KV38_RS22435	BS641_RS24305	BEP52_RS21890	BJP78_RS22290	BJP74_RS21525	DFS55_RS02490	DBO90_RS21200	EX350_RS00495	FCV17_RS02630	FCV16_RS19370	FCV18_RS10870	JPH1_RS23670
MAV_RS05795	MAH_RS05300	BBJ32_RS02955	KV38_RS05525	BS641_RS07085	BEP52_RS05820	BJP78_RS05815	BJP74_RS05360	DFS55_RS19330	DBO90_RS15385	EX350_RS17045	FCV17_RS10690	FCV16_RS03230	FCV18_RS19540	JPH1_RS07140
MAV_RS22735	MAH_RS20345	BBJ32_RS07485	KV38_RS22175	BS641_RS24045	BEP52_RS21630	BJP78_RS22030	BJP74_RS21265	DFS55_RS02760	DBO90_RS20940	EX350_RS00760	FCV17_RS02370	FCV16_RS19110	FCV18_RS10610	JPH1_RS23410
MAV_RS16605	MAH_RS09080	BBJ32_RS16755	KV38_RS15300	BS641_RS17820	BEP52_RS09715	BJP78_RS09710	BJP74_RS09265	DFS55_RS09275	DBO90_RS03400	EX350_RS07070	FCV17_RS20315	FCV16_RS12855	FCV18_RS04350	JPH1_RS17205
MAV_RS23715	MAH_RS21320	BBJ32_RS08470	KV38_RS23175	BS641_RS25085	BEP52_RS22640	BJP78_RS23045	BJP74_RS22275	DFS55_RS01745	DBO90_RS21945	EX350_RS25370	FCV17_RS03420	FCV16_RS20160	FCV18_RS11650	JPH1_RS24475
MAV_RS07275	MAH_RS06530	BBJ32_RS01720	KV38_RS06845	BS641_RS16095	BEP52_RS07080	BJP78_RS07080	BJP74_RS06620	DFS55_RS17915	DBO90_RS14090	EX350_RS15635	FCV17_RS19985	FCV16_RS12525	FCV18_RS04020	JPH1_RS08860
MAV_RS08565	MAH_RS07815	BBJ32_RS00380	KV38_RS08325	BS641_RS14780	BEP52_RS08415	BJP78_RS08400	BJP74_RS07940	DFS55_RS16460	DBO90_RS12735	EX350_RS14315	FCV17_RS18690	FCV16_RS11230	FCV18_RS02720	JPH1_RS10155
MAV_RS02990	MAH_RS02695	BBJ32_RS12545	KV38_RS02770	BS641_RS02715	BEP52_RS02660	BJP78_RS02665	BJP74_RS02645	DFS55_RS21980	DBO90_RS01170	EX350_RS21000	FCV17_RS07625	FCV16_RS24345	FCV18_RS15830	JPH1_RS02675
MAV_RS17685	MAH_RS15235	BBJ32_RS15580	KV38_RS16360	BS641_RS18910	BEP52_RS16350	BJP78_RS16600	BJP74_RS16040	DFS55_RS08215	DBO90_RS10125	EX350_RS05975	FCV17_RS21400	FCV16_RS13940	FCV18_RS05435	JPH1_RS18295
MAV_RS14970	MAH_RS10660	BBJ32_RS18360	KV38_RS13630	BS641_RS08625	BEP52_RS11355	BJP78_RS11340	BJP74_RS14585	DFS55_RS10930	DBO90_RS06600	EX350_RS08705	FCV17_RS13580	FCV16_RS06120	FCV18_RS22430	JPH1_RS15530
MAV_RS15035	MAH_RS10595	BBJ32_RS18295	KV38_RS13700	BS641_RS08550	BEP52_RS11280	BJP78_RS11265	BJP74_RS14660	DFS55_RS10855	DBO90_RS06515	EX350_RS08635	FCV17_RS13510	FCV16_RS06050	FCV18_RS22360	JPH1_RS15605
MAV_RS07780	MAH_RS07055	BBJ32_RS01185	KV38_RS07410	BS641_RS15560	BEP52_RS07630	BJP78_RS07615	BJP74_RS07155	DFS55_RS17350	DBO90_RS13555	EX350_RS15105	FCV17_RS19475	FCV16_RS12015	FCV18_RS03505	JPH1_RS09375
MAV_RS08510	MAH_RS07760	BBJ32_RS00435	KV38_RS08260	BS641_RS14840	BEP52_RS08350	BJP78_RS08335	BJP74_RS07875	DFS55_RS16525	DBO90_RS12800	EX350_RS14380	FCV17_RS18755	FCV16_RS11295	FCV18_RS02785	JPH1_RS10090
MAV_RS19075	MAH_RS16680	BBJ32_RS14290	KV38_RS18290	BS641_RS20250	BEP52_RS17675	BJP78_RS18075	BJP74_RS17365	DFS55_RS06740	DBO90_RS02085	EX350_RS04600	FCV17_RS22750	FCV16_RS15285	FCV18_RS06785	JPH1_RS19630
MAV_RS13185	MAH_RS12385	BBJ32_RS21325	KV38_RS11415	BS641_RS11065	BEP52_RS13455	BJP78_RS13440	BJP74_RS12490	DFS55_RS13245	DBO90_RS08265	EX350_RS11065	FCV17_RS15775	FCV16_RS08315	FCV18_RS24655	JPH1_RS13120
MAV_RS17750	MAH_RS15300	BBJ32_RS15515	KV38_RS16425	BS641_RS18975	BEP52_RS16415	BJP78_RS16665	BJP74_RS16105	DFS55_RS08150	DBO90_RS10190	EX350_RS05905	FCV17_RS21470	FCV16_RS14010	FCV18_RS05505	JPH1_RS18360
MAV_RS05085	MAH_RS04505	BBJ32_RS03725	KV38_RS04710	BS641_RS06280	BEP52_RS05025	BJP78_RS05015	BJP74_RS04555	DFS55_RS20150	DBO90_RS16170	EX350_RS17860	FCV17_RS09960	FCV16_RS02495	FCV18_RS18720	JPH1_RS06315
MAV_RS19200	MAH_RS16805	BBJ32_RS03935	KV38_RS18420	BS641_RS20400	BEP52_RS17805	BJP78_RS18205	BJP74_RS17495	DFS55_RS06615	DBO90_RS01895	EX350_RS04470	FCV17_RS22880	FCV16_RS15415	FCV18_RS06915	JPH1_RS19760
MAV_RS16690	MAH_RS08995	BBJ32_RS16670	KV38_RS15385	BS641_RS17905	BEP52_RS09625	BJP78_RS09620	BJP74_RS09175	DFS55_RS09190	DBO90_RS03315	EX350_RS06985	FCV17_RS20400	FCV16_RS12940	FCV18_RS04435	JPH1_RS17290
MAV_RS04180	MAH_RS03535	BBJ32_RS13390	KV38_RS03745	BS641_RS05370	BEP52_RS03615	BJP78_RS03615	BJP74_RS03585	DFS55_RS21060	DBO90_RS17090	EX350_RS18775	FCV17_RS09045	FCV16_RS01580	FCV18_RS17805	JPH1_RS05390
MAV_RS13780	MAH_RS11810	BBJ32_RS21925	KV38_RS11975	BS641_RS10445	BEP52_RS12870	BJP78_RS12855	BJP74_RS13075	DFS55_RS12690	DBO90_RS07650	EX350_RS10465	FCV17_RS15185	FCV16_RS07725	FCV18_RS24060	JPH1_RS13725
MAV_RS16740	MAH_RS08945	BBJ32_RS16620	KV38_RS15435	BS641_RS17955	BEP52_RS09575	BJP78_RS09570	BJP74_RS09125	DFS55_RS09140	DBO90_RS03265	EX350_RS06935	FCV17_RS20450	FCV16_RS12990	FCV18_RS04485	JPH1_RS17340
MAV_RS23110	MAH_RS20720	BBJ32_RS07860	KV38_RS22555	BS641_RS24425	BEP52_RS22010	BJP78_RS22410	BJP74_RS21645	DFS55_RS02370	DBO90_RS21320	EX350_RS00355	FCV17_RS02750	FCV16_RS19490	FCV18_RS10990	JPH1_RS23810
MAV_RS09830	MAH_RS08270	BBJ32_RS19040	KV38_RS08795	BS641_RS14300	BEP52_RS08885	BJP78_RS08870	BJP74_RS08420	DFS55_RS16010	DBO90_RS11845	EX350_RS13790	FCV17_RS18245	FCV16_RS10785	FCV18_RS02275	JPH1_RS10650
MAV_RS18680	MAH_RS16290	BBJ32_RS14675	KV38_RS17450	BS641_RS19850	BEP52_RS17280	BJP78_RS17680	BJP74_RS16970	DFS55_RS07130	DBO90_RS02475	EX350_RS05000	FCV17_RS22345	FCV16_RS14880	FCV18_RS06380	JPH1_RS19230
MAV_RS01635	MAH_RS01500	BBJ32_RS10790	KV38_RS01430	BS641_RS01500	BEP52_RS01430	BJP78_RS01435	BJP74_RS01415	DFS55_RS23330	DBO90_RS04280	EX350_RS22245	FCV17_RS06405	FCV16_RS23125	FCV18_RS14610	JPH1_RS01445
MAV_RS22620	MAH_RS20230	BBJ32_RS07370	KV38_RS22060	BS641_RS23930	BEP52_RS21515	BJP78_RS21915	BJP74_RS21150	DFS55_RS02875	DBO90_RS20825	EX350_RS00875	FCV17_RS02230	FCV16_RS18970	FCV18_RS10475	JPH1_RS23270
MAV_RS04760	MAH_RS04180	BBJ32_RS13970	KV38_RS04380	BS641_RS05955	BEP52_RS04250	BJP78_RS04255	BJP74_RS04220	DFS55_RS20475	DBO90_RS16510	EX350_RS18190	FCV17_RS09630	FCV16_RS02165	FCV18_RS18390	JPH1_RS05985
MAV_RS22395	MAH_RS20005	BBJ32_RS07145	KV38_RS21825	BS641_RS23690	BEP52_RS21280	BJP78_RS21675	BJP74_RS20915	DFS55_RS03125	DBO90_RS20590	EX350_RS01115	FCV17_RS01995	FCV16_RS18735	FCV18_RS10240	JPH1_RS23035
MAV_RS07270	MAH_RS06525	BBJ32_RS01725	KV38_RS06840	BS641_RS16100	BEP52_RS07075	BJP78_RS07075	BJP74_RS06615	DFS55_RS17920	DBO90_RS14095	EX350_RS15640	FCV17_RS19990	FCV16_RS12530	FCV18_RS04025	JPH1_RS08855
MAV_RS07810	MAH_RS07085	BBJ32_RS01110	KV38_RS07455	BS641_RS15530	BEP52_RS07660	BJP78_RS07645	BJP74_RS07185	DFS55_RS17320	DBO90_RS13480	EX350_RS15075	FCV17_RS19445	FCV16_RS11985	FCV18_RS03475	JPH1_RS09405
MAV_RS14090	MAH_RS11500	BBJ32_RS22220	KV38_RS12290	BS641_RS10140	BEP52_RS12565	BJP78_RS12550	BJP74_RS13380	DFS55_RS12365	DBO90_RS07355	EX350_RS10170	FCV17_RS14855	FCV16_RS07395	FCV18_RS23730	JPH1_RS14055
MAV_RS01510	MAH_RS01380	BBJ32_RS10925	KV38_RS01295	BS641_RS01370	BEP52_RS01295	BJP78_RS01300	BJP74_RS01275	DFS55_RS23550	DBO90_RS04160	EX350_RS22480	FCV17_RS06245	FCV16_RS22965	FCV18_RS14450	JPH1_RS01310
MAV_RS15655	MAH_RS10005	BBJ32_RS17710	KV38_RS14355	BS641_RS16695	BEP52_RS10670	BJP78_RS10655	BJP74_RS10380	DFS55_RS10215	DBO90_RS05900	EX350_RS08045	FCV17_RS12890	FCV16_RS05435	FCV18_RS21755	JPH1_RS16185
MAV_RS05805	MAH_RS05310	BBJ32_RS02945	KV38_RS05535	BS641_RS07095	BEP52_RS05830	BJP78_RS05825	BJP74_RS05370	DFS55_RS19320	DBO90_RS15375	EX350_RS17035	FCV17_RS10700	FCV16_RS03240	FCV18_RS19550	JPH1_RS07150
MAV_RS08125	MAH_RS07375	BBJ32_RS00820	KV38_RS07870	BS641_RS15230	BEP52_RS07965	BJP78_RS07950	BJP74_RS07490	DFS55_RS16920	DBO90_RS13185	EX350_RS14770	FCV17_RS19145	FCV16_RS11685	FCV18_RS03175	JPH1_RS09705
MAV_RS00980	MAH_RS01065	BBJ32_RS11240	KV38_RS00965	BS641_RS01030	BEP52_RS00965	BJP78_RS00975	BJP74_RS00950	DFS55_RS23875	DBO90_RS03825	EX350_RS22810	FCV17_RS05915	FCV16_RS22635	FCV18_RS14120	JPH1_RS00975
MAV_RS01960	MAH_RS01835	BBJ32_RS10460	KV38_RS01890	BS641_RS01835	BEP52_RS01775	BJP78_RS01780	BJP74_RS01760	DFS55_RS22875	DBO90_RS04610	EX350_RS21895	FCV17_RS06740	FCV16_RS23460	FCV18_RS14945	JPH1_RS01780
MAV_RS24930	MAH_RS22160	BBJ32_RS09315	KV38_RS23990	BS641_RS25900	BEP52_RS23465	BJP78_RS23870	BJP74_RS23100	DFS55_RS00930	DBO90_RS22690	EX350_RS24560	FCV17_RS04230	FCV16_RS20970	FCV18_RS12460	JPH1_RS25290
MAV_RS20885	MAH_RS18470	BBJ32_RS05635	KV38_RS20230	BS641_RS22090	BEP52_RS19700	BJP78_RS19950	BJP74_RS19340	DFS55_RS04715	DBO90_RS19060	EX350_RS02755	FCV17_RS00405	FCV16_RS17145	FCV18_RS08650	JPH1_RS21465
MAV_RS07290	MAH_RS06545	BBJ32_RS01705	KV38_RS06860	BS641_RS16080	BEP52_RS07095	BJP78_RS07095	BJP74_RS06635	DFS55_RS17900	DBO90_RS14075	EX350_RS15620	FCV17_RS19970	FCV16_RS12510	FCV18_RS04005	JPH1_RS08875
MAV_RS01780	MAH_RS01645	BBJ32_RS10645	KV38_RS01700	BS641_RS01645	BEP52_RS01580	BJP78_RS01585	BJP74_RS01565	DFS55_RS23065	DBO90_RS04425	EX350_RS22095	FCV17_RS06550	FCV16_RS23270	FCV18_RS14755	JPH1_RS01590
MAV_RS19350	MAH_RS16950	BBJ32_RS04085	KV38_RS18570	BS641_RS20550	BEP52_RS17955	BJP78_RS18355	BJP74_RS17645	DFS55_RS06465	DBO90_RS01745	EX350_RS04320	FCV17_RS23030	FCV16_RS15565	FCV18_RS07065	JPH1_RS19910
MAV_RS07750	MAH_RS07025	BBJ32_RS01215	KV38_RS07375	BS641_RS15595	BEP52_RS07595	BJP78_RS07580	BJP74_RS07120	DFS55_RS17385	DBO90_RS13590	EX350_RS15140	FCV17_RS19510	FCV16_RS12050	FCV18_RS03540	JPH1_RS09340
MAV_RS15905	MAH_RS09765	BBJ32_RS17460	KV38_RS14610	BS641_RS16940	BEP52_RS10425	BJP78_RS10410	BJP74_RS10135	DFS55_RS09970	DBO90_RS05640	EX350_RS07800	FCV17_RS12645	FCV16_RS05190	FCV18_RS21510	JPH1_RS16430
MAV_RS05175	MAH_RS04595	BBJ32_RS03635	KV38_RS04800	BS641_RS06370	BEP52_RS05115	BJP78_RS05105	BJP74_RS04650	DFS55_RS20060	DBO90_RS16080	EX350_RS17770	FCV17_RS10055	FCV16_RS02590	FCV18_RS18810	JPH1_RS06405
MAV_RS02995	MAH_RS02700	BBJ32_RS12550	KV38_RS02775	BS641_RS02720	BEP52_RS02665	BJP78_RS02670	BJP74_RS02650	DFS55_RS21975	DBO90_RS01175	EX350_RS20995	FCV17_RS07630	FCV16_RS24350	FCV18_RS15835	JPH1_RS02680
MAV_RS18055	MAH_RS15600	BBJ32_RS15215	KV38_RS16740	BS641_RS19285	BEP52_RS16730	BJP78_RS16985	BJP74_RS16420	DFS55_RS07835	DBO90_RS03020	EX350_RS05590	FCV17_RS21790	FCV16_RS14330	FCV18_RS05825	JPH1_RS18675
MAV_RS07970	MAH_RS07245	BBJ32_RS00950	KV38_RS07735	BS641_RS15365	BEP52_RS07830	BJP78_RS07815	BJP74_RS07355	DFS55_RS17055	DBO90_RS13315	EX350_RS14910	FCV17_RS19280	FCV16_RS11820	FCV18_RS03310	JPH1_RS09570
MAV_RS21295	MAH_RS18880	BBJ32_RS06045	KV38_RS20650	BS641_RS22525	BEP52_RS20120	BJP78_RS20370	BJP74_RS19760	DFS55_RS04295	DBO90_RS19475	EX350_RS02300	FCV17_RS00845	FCV16_RS17585	FCV18_RS09090	JPH1_RS21910
MAV_RS07355	MAH_RS06610	BBJ32_RS01640	KV38_RS06940	BS641_RS15990	BEP52_RS07160	BJP78_RS07160	BJP74_RS06700	DFS55_RS17810	DBO90_RS14010	EX350_RS15540	FCV17_RS19905	FCV16_RS12445	FCV18_RS03940	JPH1_RS08940
MAV_RS17145	MAH_RS14675	BBJ32_RS16105	KV38_RS15820	BS641_RS18380	BEP52_RS15770	BJP78_RS16020	BJP74_RS15460	DFS55_RS08755	DBO90_RS09585	EX350_RS06510	FCV17_RS20870	FCV16_RS13410	FCV18_RS04905	JPH1_RS17760
MAV_RS17770	MAH_RS15320	BBJ32_RS15495	KV38_RS16445	BS641_RS18995	BEP52_RS16435	BJP78_RS16690	BJP74_RS16125	DFS55_RS08130	DBO90_RS10215	EX350_RS05885	FCV17_RS21495	FCV16_RS14035	FCV18_RS05530	JPH1_RS18385
MAV_RS21500	MAH_RS19085	BBJ32_RS06250	KV38_RS20855	BS641_RS22730	BEP52_RS20325	BJP78_RS20725	BJP74_RS19965	DFS55_RS04090	DBO90_RS19680	EX350_RS02095	FCV17_RS01050	FCV16_RS17790	FCV18_RS09295	JPH1_RS22115
MAV_RS03025	MAH_RS02730	BBJ32_RS12580	KV38_RS02805	BS641_RS02775	BEP52_RS02705	BJP78_RS02710	BJP74_RS02680	DFS55_RS21945	DBO90_RS01205	EX350_RS20965	FCV17_RS07660	FCV16_RS24380	FCV18_RS15865	JPH1_RS02710
MAV_RS10525	MAH_RS14125	BBJ32_RS19695	KV38_RS09470	BS641_RS13405	BEP52_RS15235	BJP78_RS15485	BJP74_RS10735	DFS55_RS15160	DBO90_RS11160	EX350_RS13085	FCV17_RS17560	FCV16_RS10100	FCV18_RS01590	JPH1_RS11370
MAV_RS23570	MAH_RS21175	BBJ32_RS08320	KV38_RS23025	BS641_RS24930	BEP52_RS22490	BJP78_RS22895	BJP74_RS22125	DFS55_RS01895	DBO90_RS21795	EX350_RS25520	FCV17_RS03270	FCV16_RS20010	FCV18_RS11500	JPH1_RS24325
MAV_RS07935	MAH_RS07210	BBJ32_RS00985	KV38_RS07700	BS641_RS15400	BEP52_RS07795	BJP78_RS07780	BJP74_RS07320	DFS55_RS17090	DBO90_RS13350	EX350_RS14945	FCV17_RS19315	FCV16_RS11855	FCV18_RS03345	JPH1_RS09535
MAV_RS17130	MAH_RS14660	BBJ32_RS16120	KV38_RS15805	BS641_RS18365	BEP52_RS15755	BJP78_RS16005	BJP74_RS15445	DFS55_RS08770	DBO90_RS09570	EX350_RS06525	FCV17_RS20855	FCV16_RS13395	FCV18_RS04890	JPH1_RS17745
MAV_RS23285	MAH_RS20890	BBJ32_RS08035	KV38_RS22730	BS641_RS24640	BEP52_RS22190	BJP78_RS22590	BJP74_RS21830	DFS55_RS02195	DBO90_RS21495	EX350_RS00135	FCV17_RS02960	FCV16_RS19700	FCV18_RS11200	JPH1_RS24025
MAV_RS01440	MAH_RS01310	BBJ32_RS10995	KV38_RS01215	BS641_RS01300	BEP52_RS01215	BJP78_RS01225	BJP74_RS01200	DFS55_RS23625	DBO90_RS04080	EX350_RS22555	FCV17_RS06170	FCV16_RS22890	FCV18_RS14375	JPH1_RS01230
MAV_RS07445	MAH_RS06700	BBJ32_RS01550	KV38_RS07030	BS641_RS15900	BEP52_RS07250	BJP78_RS07250	BJP74_RS06790	DFS55_RS17720	DBO90_RS13920	EX350_RS15450	FCV17_RS19815	FCV16_RS12355	FCV18_RS03850	JPH1_RS09030
MAV_RS18415	MAH_RS16020	BBJ32_RS14945	KV38_RS17175	BS641_RS19570	BEP52_RS17005	BJP78_RS17405	BJP74_RS16695	DFS55_RS07405	DBO90_RS02745	EX350_RS05290	FCV17_RS22070	FCV16_RS14605	FCV18_RS06105	JPH1_RS18955
MAV_RS06015	MAH_RS05490	BBJ32_RS02765	KV38_RS05725	BS641_RS07280	BEP52_RS06020	BJP78_RS06015	BJP74_RS05560	DFS55_RS19135	DBO90_RS15180	EX350_RS16850	FCV17_RS10935	FCV16_RS03475	FCV18_RS19785	JPH1_RS07345
MAV_RS20705	MAH_RS18290	BBJ32_RS05455	KV38_RS20050	BS641_RS21910	BEP52_RS19525	BJP78_RS19770	BJP74_RS19160	DFS55_RS04895	DBO90_RS18875	EX350_RS02940	FCV17_RS24425	FCV16_RS16960	FCV18_RS08465	JPH1_RS21280
MAV_RS14620	MAH_RS10995	BBJ32_RS22625	KV38_RS13295	BS641_RS08960	BEP52_RS11690	BJP78_RS11675	BJP74_RS14255	DFS55_RS11295	DBO90_RS06945	EX350_RS09075	FCV17_RS13945	FCV16_RS06485	FCV18_RS22795	JPH1_RS15165
MAV_RS24595	MAH_RS21785	BBJ32_RS08965	KV38_RS23650	BS641_RS25555	BEP52_RS23080	BJP78_RS23485	BJP74_RS22715	DFS55_RS01270	DBO90_RS22450	EX350_RS24900	FCV17_RS03890	FCV16_RS20630	FCV18_RS12120	JPH1_RS24950
MAV_RS03160	MAH_RS02865	BBJ32_RS12715	KV38_RS02940	BS641_RS03230	BEP52_RS02840	BJP78_RS02845	BJP74_RS02815	DFS55_RS21810	DBO90_RS01340	EX350_RS20830	FCV17_RS07800	FCV16_RS24520	FCV18_RS16005	JPH1_RS02845
MAV_RS07575	MAH_RS06845	BBJ32_RS01520	KV38_RS07200	BS641_RS15770	BEP52_RS07415	BJP78_RS07400	BJP74_RS06940	DFS55_RS17560	DBO90_RS13770	EX350_RS15315	FCV17_RS19685	FCV16_RS12225	FCV18_RS03715	JPH1_RS09165
MAV_RS20450	MAH_RS18040	BBJ32_RS05205	KV38_RS19790	BS641_RS21650	BEP52_RS19110	BJP78_RS19510	BJP74_RS18800	DFS55_RS05150	DBO90_RS18620	EX350_RS03215	FCV17_RS24170	FCV16_RS16705	FCV18_RS08210	JPH1_RS21015
MAV_RS06190	MAH_RS05665	BBJ32_RS02590	KV38_RS05915	BS641_RS07455	BEP52_RS06205	BJP78_RS06200	BJP74_RS05745	DFS55_RS18950	DBO90_RS14995	EX350_RS16660	FCV17_RS11125	FCV16_RS03665	FCV18_RS19975	JPH1_RS07535
MAV_RS21980	MAH_RS19585	BBJ32_RS06730	KV38_RS21380	BS641_RS23230	BEP52_RS20835	BJP78_RS21230	BJP74_RS20470	DFS55_RS03565	DBO90_RS20160	EX350_RS01555	FCV17_RS01550	FCV16_RS18290	FCV18_RS09795	JPH1_RS22595
MAV_RS07465	MAH_RS06720	BBJ32_RS01390	KV38_RS07055	BS641_RS15880	BEP52_RS07275	BJP78_RS07275	BJP74_RS06815	DFS55_RS17700	DBO90_RS13900	EX350_RS15430	FCV17_RS19795	FCV16_RS12335	FCV18_RS03830	JPH1_RS09050
MAV_RS13590	MAH_RS12000	BBJ32_RS21735	KV38_RS11780	BS641_RS10635	BEP52_RS13060	BJP78_RS13045	BJP74_RS12885	DFS55_RS12880	DBO90_RS07840	EX350_RS10650	FCV17_RS15375	FCV16_RS07915	FCV18_RS24255	JPH1_RS13535
MAV_RS16100	MAH_RS09575	BBJ32_RS17270	KV38_RS14805	BS641_RS17135	BEP52_RS10230	BJP78_RS10215	BJP74_RS09930	DFS55_RS09780	DBO90_RS05445	EX350_RS07610	FCV17_RS12460	FCV16_RS05000	FCV18_RS21320	JPH1_RS16620
MAV_RS04215	MAH_RS03580	BBJ32_RS13425	KV38_RS03780	BS641_RS05405	BEP52_RS03650	BJP78_RS03650	BJP74_RS03620	DFS55_RS21025	DBO90_RS17055	EX350_RS18740	FCV17_RS09080	FCV16_RS01615	FCV18_RS17840	JPH1_RS05425
MAV_RS21555	MAH_RS19140	BBJ32_RS06305	KV38_RS20910	BS641_RS22785	BEP52_RS20380	BJP78_RS20780	BJP74_RS20020	DFS55_RS04035	DBO90_RS19735	EX350_RS02040	FCV17_RS01105	FCV16_RS17845	FCV18_RS09350	JPH1_RS22170
MAV_RS23960	MAH_RS21565	BBJ32_RS08715	KV38_RS23420	BS641_RS25330	BEP52_RS22855	BJP78_RS23260	BJP74_RS22490	DFS55_RS01500	DBO90_RS22190	EX350_RS25125	FCV17_RS03665	FCV16_RS20405	FCV18_RS11895	JPH1_RS24720
MAV_RS20120	MAH_RS17710	BBJ32_RS04870	KV38_RS19455	BS641_RS21315	BEP52_RS18775	BJP78_RS19175	BJP74_RS18465	DFS55_RS05485	DBO90_RS18280	EX350_RS03550	FCV17_RS23795	FCV16_RS16340	FCV18_RS07840	JPH1_RS20680
MAV_RS11010	MAH_RS13810	BBJ32_RS20005	KV38_RS09800	BS641_RS13085	BEP52_RS14915	BJP78_RS15165	BJP74_RS11055	DFS55_RS14840	DBO90_RS10840	EX350_RS12760	FCV17_RS17235	FCV16_RS09775	FCV18_RS01265	JPH1_RS11695
MAV_RS18330	MAH_RS15935	BBJ32_RS15030	KV38_RS17090	BS641_RS19485	BEP52_RS16920	BJP78_RS17320	BJP74_RS16610	DFS55_RS07490	DBO90_RS02830	EX350_RS05375	FCV17_RS21985	FCV16_RS14520	FCV18_RS06020	JPH1_RS18870
MAV_RS20365	MAH_RS17955	BBJ32_RS05120	KV38_RS19705	BS641_RS21565	BEP52_RS19025	BJP78_RS19425	BJP74_RS18715	DFS55_RS05235	DBO90_RS18535	EX350_RS03300	FCV17_RS24085	FCV16_RS16620	FCV18_RS08125	JPH1_RS20930
MAV_RS18385	MAH_RS15990	BBJ32_RS14975	KV38_RS17145	BS641_RS19540	BEP52_RS16975	BJP78_RS17375	BJP74_RS16665	DFS55_RS07435	DBO90_RS02775	EX350_RS05320	FCV17_RS22040	FCV16_RS14575	FCV18_RS06075	JPH1_RS18925
MAV_RS07480	MAH_RS06735	BBJ32_RS01405	KV38_RS07100	BS641_RS15865	BEP52_RS07320	BJP78_RS07290	BJP74_RS06830	DFS55_RS17660	DBO90_RS13885	EX350_RS15415	FCV17_RS19780	FCV16_RS12320	FCV18_RS03815	JPH1_RS09065
MAV_RS18075	MAH_RS15620	BBJ32_RS15195	KV38_RS16760	BS641_RS19305	BEP52_RS16750	BJP78_RS17005	BJP74_RS16440	DFS55_RS07815	DBO90_RS03000	EX350_RS05570	FCV17_RS21810	FCV16_RS14345	FCV18_RS05845	JPH1_RS18695
MAV_RS08110	MAH_RS07360	BBJ32_RS00835	KV38_RS07855	BS641_RS15245	BEP52_RS07950	BJP78_RS07935	BJP74_RS07475	DFS55_RS16935	DBO90_RS13200	EX350_RS14785	FCV17_RS19160	FCV16_RS11700	FCV18_RS03190	JPH1_RS09690
MAV_RS18870	MAH_RS16480	BBJ32_RS14490	KV38_RS17650	BS641_RS20050	BEP52_RS17475	BJP78_RS17875	BJP74_RS17165	DFS55_RS06935	DBO90_RS02285	EX350_RS04800	FCV17_RS22550	FCV16_RS15085	FCV18_RS06585	JPH1_RS19430
MAV_RS21585	MAH_RS19170	BBJ32_RS06335	KV38_RS20940	BS641_RS22815	BEP52_RS20410	BJP78_RS20810	BJP74_RS20050	DFS55_RS04005	DBO90_RS19765	EX350_RS02010	FCV17_RS01135	FCV16_RS17875	FCV18_RS09380	JPH1_RS22200
MAV_RS23360	MAH_RS20965	BBJ32_RS08110	KV38_RS22810	BS641_RS24720	BEP52_RS22270	BJP78_RS22670	BJP74_RS21910	DFS55_RS02115	DBO90_RS21575	EX350_RS00055	FCV17_RS03050	FCV16_RS19790	FCV18_RS11280	JPH1_RS24105
MAV_RS16600	MAH_RS09085	BBJ32_RS16760	KV38_RS15295	BS641_RS17815	BEP52_RS09720	BJP78_RS09715	BJP74_RS09270	DFS55_RS09280	DBO90_RS03405	EX350_RS07075	FCV17_RS20310	FCV16_RS12850	FCV18_RS04345	JPH1_RS17200
MAV_RS05200	MAH_RS04620	BBJ32_RS03610	KV38_RS04825	BS641_RS06395	BEP52_RS05140	BJP78_RS05130	BJP74_RS04675	DFS55_RS20035	DBO90_RS16055	EX350_RS17745	FCV17_RS10080	FCV16_RS02615	FCV18_RS18835	JPH1_RS06430
MAV_RS15395	MAH_RS10250	BBJ32_RS17940	KV38_RS14060	BS641_RS16415	BEP52_RS10920	BJP78_RS10905	BJP74_RS15020	DFS55_RS10500	DBO90_RS06155	EX350_RS08270	FCV17_RS13130	FCV16_RS05670	FCV18_RS21980	JPH1_RS15965
MAV_RS18050	MAH_RS15595	BBJ32_RS15220	KV38_RS16735	BS641_RS19280	BEP52_RS16725	BJP78_RS16980	BJP74_RS16415	DFS55_RS07840	DBO90_RS03025	EX350_RS05595	FCV17_RS21785	FCV16_RS14325	FCV18_RS05820	JPH1_RS18670
MAV_RS08255	MAH_RS07505	BBJ32_RS00690	KV38_RS08005	BS641_RS15095	BEP52_RS08095	BJP78_RS08080	BJP74_RS07620	DFS55_RS16780	DBO90_RS13055	EX350_RS14635	FCV17_RS19010	FCV16_RS11550	FCV18_RS03040	JPH1_RS09840
MAV_RS07505	MAH_RS06760	BBJ32_RS01430	KV38_RS07130	BS641_RS15840	BEP52_RS07345	BJP78_RS07315	BJP74_RS06855	DFS55_RS17630	DBO90_RS13860	EX350_RS15385	FCV17_RS19755	FCV16_RS12295	FCV18_RS03785	JPH1_RS09095
MAV_RS19645	MAH_RS17255	BBJ32_RS04380	KV38_RS18865	BS641_RS20845	BEP52_RS18255	BJP78_RS18655	BJP74_RS17945	DFS55_RS06165	DBO90_RS17790	EX350_RS04025	FCV17_RS23335	FCV16_RS15870	FCV18_RS07370	JPH1_RS20205
MAV_RS14660	MAH_RS10955	BBJ32_RS22665	KV38_RS13335	BS641_RS08920	BEP52_RS11650	BJP78_RS11635	BJP74_RS14295	DFS55_RS11255	DBO90_RS06905	EX350_RS09035	FCV17_RS13905	FCV16_RS06445	FCV18_RS22755	JPH1_RS15205
MAV_RS13740	MAH_RS11850	BBJ32_RS21885	KV38_RS11935	BS641_RS10485	BEP52_RS12910	BJP78_RS12895	BJP74_RS13035	DFS55_RS12730	DBO90_RS07690	EX350_RS10505	FCV17_RS15225	FCV16_RS07765	FCV18_RS24100	JPH1_RS13685
MAV_RS01840	MAH_RS01705	BBJ32_RS10580	KV38_RS01765	BS641_RS01715	BEP52_RS01645	BJP78_RS01650	BJP74_RS01630	DFS55_RS23000	DBO90_RS04490	EX350_RS22030	FCV17_RS06615	FCV16_RS23335	FCV18_RS14820	JPH1_RS01655
MAV_RS03140	MAH_RS02845	BBJ32_RS12695	KV38_RS02920	BS641_RS03210	BEP52_RS02820	BJP78_RS02825	BJP74_RS02795	DFS55_RS21830	DBO90_RS01320	EX350_RS20850	FCV17_RS07780	FCV16_RS24500	FCV18_RS15985	JPH1_RS02825
MAV_RS22030	MAH_RS19635	BBJ32_RS06780	KV38_RS21430	BS641_RS23280	BEP52_RS20885	BJP78_RS21280	BJP74_RS20520	DFS55_RS03515	DBO90_RS20210	EX350_RS01505	FCV17_RS01600	FCV16_RS18340	FCV18_RS09845	JPH1_RS22645
MAV_RS06535	MAH_RS06015	BBJ32_RS02240	KV38_RS06270	BS641_RS07810	BEP52_RS06560	BJP78_RS06555	BJP74_RS06100	DFS55_RS18595	DBO90_RS14640	EX350_RS16300	FCV17_RS11480	FCV16_RS04020	FCV18_RS20340	JPH1_RS07890
MAV_RS19785	MAH_RS17395	BBJ32_RS04520	KV38_RS19010	BS641_RS20985	BEP52_RS18400	BJP78_RS18800	BJP74_RS18090	DFS55_RS06025	DBO90_RS17930	EX350_RS03880	FCV17_RS23475	FCV16_RS16010	FCV18_RS07510	JPH1_RS20350
MAV_RS00665	MAH_RS00750	BBJ32_RS11555	KV38_RS00650	BS641_RS00700	BEP52_RS00650	BJP78_RS00660	BJP74_RS00635	DFS55_RS24190	DBO90_RS00680	EX350_RS23125	FCV17_RS05600	FCV16_RS22315	FCV18_RS13805	JPH1_RS00660
MAV_RS05225	MAH_RS04645	BBJ32_RS03585	KV38_RS04850	BS641_RS06420	BEP52_RS05165	BJP78_RS05160	BJP74_RS04705	DFS55_RS20010	DBO90_RS16030	EX350_RS17720	FCV17_RS10105	FCV16_RS02640	FCV18_RS18860	JPH1_RS06455
MAV_RS07540	MAH_RS06795	BBJ32_RS01470	KV38_RS07165	BS641_RS15805	BEP52_RS07380	BJP78_RS07350	BJP74_RS06890	DFS55_RS17595	DBO90_RS13820	EX350_RS15350	FCV17_RS19720	FCV16_RS12260	FCV18_RS03750	JPH1_RS09130
MAV_RS11000	MAH_RS13820	BBJ32_RS19995	KV38_RS09790	BS641_RS13095	BEP52_RS14925	BJP78_RS15175	BJP74_RS11045	DFS55_RS14850	DBO90_RS10850	EX350_RS12770	FCV17_RS17245	FCV16_RS09785	FCV18_RS01275	JPH1_RS11685
MAV_RS16980	MAH_RS14515	BBJ32_RS16260	KV38_RS15665	BS641_RS18225	BEP52_RS15615	BJP78_RS15865	BJP74_RS15305	DFS55_RS08910	DBO90_RS09430	EX350_RS06670	FCV17_RS20715	FCV16_RS13255	FCV18_RS04750	JPH1_RS17600
MAV_RS21580	MAH_RS19165	BBJ32_RS06330	KV38_RS20935	BS641_RS22810	BEP52_RS20405	BJP78_RS20805	BJP74_RS20045	DFS55_RS04010	DBO90_RS19760	EX350_RS02015	FCV17_RS01130	FCV16_RS17870	FCV18_RS09375	JPH1_RS22195
MAV_RS13155	MAH_RS12415	BBJ32_RS21285	KV38_RS11380	BS641_RS11095	BEP52_RS13490	BJP78_RS13475	BJP74_RS12455	DFS55_RS13280	DBO90_RS08315	EX350_RS11100	FCV17_RS15810	FCV16_RS08350	FCV18_RS24690	JPH1_RS13085
MAV_RS07850	MAH_RS07125	BBJ32_RS01070	KV38_RS07495	BS641_RS15490	BEP52_RS07700	BJP78_RS07685	BJP74_RS07225	DFS55_RS17280	DBO90_RS13440	EX350_RS15035	FCV17_RS19405	FCV16_RS11945	FCV18_RS03435	JPH1_RS09445
[truncated: 1,344 more rows]
