# Supplementary material for: Genetic Diversity Among Mycobacterium avium Subspecies Revealed by Analysis of Complete Genome Sequences
Source: Front Microbiol. 2020 Aug 7;11:1701. doi: 10.3389/fmicb.2020.01701 (PMC7426613; doi:10.3389/fmicb.2020.01701)
Supplement: TABLE S9 — Map core genes present by PanOCT analysis. [file Table_9.xlsx]

## Sheet: shared_clusters
Suplemental table S9. Map core genome obtained by PanOCT analysis
cluster id	members	protein name	centroid genome	centroid locus	role_ids	attributes	GCF_000007865	GCF_000390085	GCF_000835225	GCF_000835265	GCF_001653355	GCF_002208705	GCF_002211525	GCF_003713025	GCF_003713045	GCF_003815795	GCF_003815815	GCF_003816035	GCF_003957335
1	13	chromosomal replication initiator protein DnaA	GCF_000007865	MAP_RS00005	0		MAP_RS00005	MAP4_RS00005	RC58_RS00005	RE97_RS00005	A0V42_RS00005	CEP84_RS06795	CEG92_RS00005	EC391_RS14765	EC390_RS07975	EGM63_RS09905	EGM64_RS22745	EGM60_RS19645	EGA31_RS00005
2	13	DNA polymerase III subunit beta	GCF_000007865	MAP_RS00010	0		MAP_RS00010	MAP4_RS00010	RC58_RS00010	RE97_RS00010	A0V42_RS00010	CEP84_RS06800	CEG92_RS00010	EC391_RS14770	EC390_RS07970	EGM63_RS09910	EGM64_RS22740	EGM60_RS19640	EGA31_RS00010
3	13	DNA replication and repair protein RecF	GCF_000007865	MAP_RS00015	0		MAP_RS00015	MAP4_RS00015	RC58_RS00015	RE97_RS00015	A0V42_RS00015	CEP84_RS06805	CEG92_RS00015	EC391_RS14775	EC390_RS07965	EGM63_RS09915	EGM64_RS22735	EGM60_RS19635	EGA31_RS00015
4	13	DUF721 domain-containing protein	GCF_000007865	MAP_RS00020	0		MAP_RS00020	MAP4_RS00020	RC58_RS00020	RE97_RS00020	A0V42_RS00020	CEP84_RS06810	CEG92_RS00020	EC391_RS14780	EC390_RS07960	EGM63_RS09920	EGM64_RS22730	EGM60_RS19630	EGA31_RS00020
5	13	DNA topoisomerase IV subunit B	GCF_000007865	MAP_RS00025	0		MAP_RS00025	MAP4_RS00025	RC58_RS00025	RE97_RS00025	A0V42_RS00025	CEP84_RS06815	CEG92_RS00025	EC391_RS14785	EC390_RS07955	EGM63_RS09925	EGM64_RS22725	EGM60_RS19625	EGA31_RS00025
6	13	DNA gyrase subunit A	GCF_000007865	MAP_RS00030	0		MAP_RS00030	MAP4_RS00030	RC58_RS00030	RE97_RS00030	A0V42_RS00030	CEP84_RS06820	CEG92_RS00030	EC391_RS14790	EC390_RS07950	EGM63_RS09930	EGM64_RS22720	EGM60_RS19620	EGA31_RS00030
8	13	TetR/AcrR family transcriptional regulator	GCF_000390085	MAP4_RS19265	0		MAP_RS22345	MAP4_RS19265	RC58_RS19225	RE97_RS19270	A0V42_RS00050	CEP84_RS03655	CEG92_RS00050	EC391_RS11620	EC390_RS11120	EGM63_RS06750	EGM64_RS02855	EGM60_RS22800	EGA31_RS00060
10	13	cell wall synthesis protein CwsA	GCF_000007865	MAP_RS00060	0		MAP_RS00060	MAP4_RS19255	RC58_RS19215	RE97_RS19260	A0V42_RS00060	CEP84_RS03645	CEG92_RS00060	EC391_RS11610	EC390_RS11130	EGM63_RS06740	EGM64_RS02865	EGM60_RS22810	EGA31_RS00070
11	13	peptidylprolyl isomerase	GCF_000007865	MAP_RS00065	0		MAP_RS00065	MAP4_RS19250	RC58_RS19210	RE97_RS19255	A0V42_RS00065	CEP84_RS03640	CEG92_RS00065	EC391_RS11605	EC390_RS11135	EGM63_RS06735	EGM64_RS02870	EGM60_RS22815	EGA31_RS00075
12	13	hypothetical protein	GCF_000007865	MAP_RS22350	0		MAP_RS22350	MAP4_RS23010	RC58_RS23080	RE97_RS23110	A0V42_RS22325	CEP84_RS03635	CEG92_RS00070	EC391_RS11600	EC390_RS11140	EGM63_RS06730	EGM64_RS02875	EGM60_RS22820	EGA31_RS00080
13	13	cell division protein CrgA	GCF_000007865	MAP_RS00075	0		MAP_RS00075	MAP4_RS19240	RC58_RS19200	RE97_RS19245	A0V42_RS00075	CEP84_RS03630	CEG92_RS00075	EC391_RS11595	EC390_RS11145	EGM63_RS06725	EGM64_RS02880	EGM60_RS22825	EGA31_RS00085
14	13	DUF881 domain-containing protein	GCF_000007865	MAP_RS00080	0		MAP_RS00080	MAP4_RS19235	RC58_RS19195	RE97_RS19240	A0V42_RS00080	CEP84_RS03625	CEG92_RS00080	EC391_RS11590	EC390_RS11150	EGM63_RS06720	EGM64_RS02885	EGM60_RS22830	EGA31_RS00090
15	13	aminodeoxychorismate/anthranilate synthase component II	GCF_000007865	MAP_RS00085	0		MAP_RS00085	MAP4_RS19230	RC58_RS19190	RE97_RS19235	A0V42_RS00085	CEP84_RS03620	CEG92_RS00085	EC391_RS11585	EC390_RS11155	EGM63_RS06715	EGM64_RS02890	EGM60_RS22835	EGA31_RS00095
16	13	serine/threonine protein kinase	GCF_000007865	MAP_RS00090	0		MAP_RS00090	MAP4_RS19225	RC58_RS19185	RE97_RS19230	A0V42_RS00090	CEP84_RS03615	CEG92_RS00090	EC391_RS11580	EC390_RS11160	EGM63_RS06710	EGM64_RS02895	EGM60_RS22840	EGA31_RS00100
17	13	penicillin-binding protein 2	GCF_000007865	MAP_RS00100	0		MAP_RS00100	MAP4_RS19215	RC58_RS19175	RE97_RS19220	A0V42_RS00100	CEP84_RS03605	CEG92_RS00100	EC391_RS11570	EC390_RS11170	EGM63_RS06700	EGM64_RS02905	EGM60_RS22850	EGA31_RS00110
18	13	FtsW/RodA/SpoVE family cell cycle protein	GCF_000007865	MAP_RS00105	0		MAP_RS00105	MAP4_RS19210	RC58_RS19170	RE97_RS19215	A0V42_RS00105	CEP84_RS03600	CEG92_RS00105	EC391_RS11565	EC390_RS11175	EGM63_RS06695	EGM64_RS02910	EGM60_RS22855	EGA31_RS00115
19	13	serine/threonine protein phosphatase	GCF_000007865	MAP_RS00110	0		MAP_RS00110	MAP4_RS19205	RC58_RS19165	RE97_RS19210	A0V42_RS00110	CEP84_RS03595	CEG92_RS00110	EC391_RS11560	EC390_RS11180	EGM63_RS06690	EGM64_RS02915	EGM60_RS22860	EGA31_RS00120
20	13	membrane protein	GCF_000007865	MAP_RS00115	0		MAP_RS00115	MAP4_RS19200	RC58_RS19160	RE97_RS19205	A0V42_RS00115	CEP84_RS03590	CEG92_RS00115	EC391_RS11555	EC390_RS11185	EGM63_RS06685	EGM64_RS02920	EGM60_RS22865	EGA31_RS00125
21	13	DUF2662 domain-containing protein	GCF_000007865	MAP_RS00120	0		MAP_RS00120	MAP4_RS19195	RC58_RS19155	RE97_RS19200	A0V42_RS00120	CEP84_RS03585	CEG92_RS00120	EC391_RS11550	EC390_RS11190	EGM63_RS06680	EGM64_RS02925	EGM60_RS22870	EGA31_RS00130
22	13	DinB family protein	GCF_000007865	MAP_RS00130	0		MAP_RS00130	MAP4_RS19185	RC58_RS19145	RE97_RS19190	A0V42_RS00130	CEP84_RS03575	CEG92_RS00130	EC391_RS11540	EC390_RS11200	EGM63_RS06670	EGM64_RS02935	EGM60_RS22880	EGA31_RS00140
23	13	acyl carrier protein	GCF_000007865	MAP_RS00135	0		MAP_RS00135	MAP4_RS19180	RC58_RS19140	RE97_RS19185	A0V42_RS00135	CEP84_RS03570	CEG92_RS00135	EC391_RS11535	EC390_RS11205	EGM63_RS06665	EGM64_RS02940	EGM60_RS22885	EGA31_RS00145
24	13	long-chain-fatty-acid--CoA ligase	GCF_000007865	MAP_RS00140	0		MAP_RS00140	MAP4_RS19175	RC58_RS19135	RE97_RS19180	A0V42_RS00140	CEP84_RS03565	CEG92_RS00140	EC391_RS11530	EC390_RS11210	EGM63_RS06660	EGM64_RS02945	EGM60_RS22890	EGA31_RS00150
25	13	DUF4237 domain-containing protein	GCF_000007865	MAP_RS00145	0		MAP_RS00145	MAP4_RS19170	RC58_RS19130	RE97_RS19175	A0V42_RS00145	CEP84_RS03560	CEG92_RS00145	EC391_RS11525	EC390_RS11215	EGM63_RS06655	EGM64_RS02950	EGM60_RS22895	EGA31_RS00155
26	13	hypothetical protein	GCF_000007865	MAP_RS00150	0		MAP_RS00150	MAP4_RS19165	RC58_RS19125	RE97_RS19170	A0V42_RS00150	CEP84_RS03555	CEG92_RS00150	EC391_RS11520	EC390_RS11220	EGM63_RS06650	EGM64_RS02955	EGM60_RS22900	EGA31_RS00160
28	13	hypothetical protein	GCF_000007865	MAP_RS22355	0		MAP_RS22355	MAP4_RS23005	RC58_RS23075	RE97_RS19160	A0V42_RS22330	CEP84_RS03535	CEG92_RS00160	EC391_RS11500	EC390_RS11240	EGM63_RS06630	EGM64_RS02975	EGM60_RS22920	EGA31_RS00180
30	13	N-acetyltransferase	GCF_000007865	MAP_RS00165	0		MAP_RS00165	MAP4_RS19150	RC58_RS19115	RE97_RS19155	A0V42_RS00165	CEP84_RS03520	CEG92_RS00175	EC391_RS11485	EC390_RS11255	EGM63_RS06615	EGM64_RS02990	EGM60_RS22935	EGA31_RS00195
31	13	pirin family protein	GCF_000007865	MAP_RS00170	0		MAP_RS00170	MAP4_RS19145	RC58_RS19110	RE97_RS19150	A0V42_RS00170	CEP84_RS03515	CEG92_RS00180	EC391_RS11480	EC390_RS11260	EGM63_RS06610	EGM64_RS02995	EGM60_RS22940	EGA31_RS00200
32	13	acyl-CoA dehydrogenase	GCF_000007865	MAP_RS00175	0		MAP_RS00175	MAP4_RS19140	RC58_RS19105	RE97_RS19145	A0V42_RS00175	CEP84_RS03510	CEG92_RS00185	EC391_RS11475	EC390_RS11265	EGM63_RS06605	EGM64_RS03000	EGM60_RS22945	EGA31_RS00205
33	13	transcriptional regulator	GCF_000007865	MAP_RS00180	0		MAP_RS00180	MAP4_RS19135	RC58_RS19100	RE97_RS19140	A0V42_RS00180	CEP84_RS03505	CEG92_RS00190	EC391_RS11470	EC390_RS11270	EGM63_RS06600	EGM64_RS03005	EGM60_RS22950	EGA31_RS00210
35	13	XRE family transcriptional regulator	GCF_000007865	MAP_RS00190	0		MAP_RS00190	MAP4_RS19125	RC58_RS19090	RE97_RS19130	A0V42_RS00190	CEP84_RS03490	CEG92_RS00200	EC391_RS11455	EC390_RS11285	EGM63_RS06585	EGM64_RS03020	EGM60_RS22965	EGA31_RS00225
37	13	DUF4226 domain-containing protein	GCF_000007865	MAP_RS00200	0		MAP_RS00200	MAP4_RS19115	RC58_RS19080	RE97_RS19120	A0V42_RS00200	CEP84_RS03480	CEG92_RS00210	EC391_RS11445	EC390_RS11295	EGM63_RS06575	EGM64_RS03030	EGM60_RS22975	EGA31_RS00235
38	13	DUF4226 domain-containing protein	GCF_000007865	MAP_RS00205	0		MAP_RS00205	MAP4_RS19110	RC58_RS19075	RE97_RS19115	A0V42_RS00205	CEP84_RS03475	CEG92_RS00215	EC391_RS11440	EC390_RS11300	EGM63_RS06570	EGM64_RS03035	EGM60_RS22980	EGA31_RS00240
39	13	ESX-1 secretion-associated protein	GCF_000007865	MAP_RS00210	0		MAP_RS00210	MAP4_RS19105	RC58_RS19070	RE97_RS19110	A0V42_RS00210	CEP84_RS03470	CEG92_RS00220	EC391_RS11435	EC390_RS11305	EGM63_RS06565	EGM64_RS03040	EGM60_RS22985	EGA31_RS00245
40	13	DUF2694 domain-containing protein	GCF_000007865	MAP_RS00215	0		MAP_RS00215	MAP4_RS19100	RC58_RS19065	RE97_RS19105	A0V42_RS00215	CEP84_RS03465	CEG92_RS00225	EC391_RS11430	EC390_RS11310	EGM63_RS06560	EGM64_RS03045	EGM60_RS22990	EGA31_RS00250
41	13	hypothetical protein	GCF_000007865	MAP_RS00220	0		MAP_RS00220	MAP4_RS19095	RC58_RS19060	RE97_RS19100	A0V42_RS00220	CEP84_RS03460	CEG92_RS00230	EC391_RS11425	EC390_RS11315	EGM63_RS06555	EGM64_RS03050	EGM60_RS22995	EGA31_RS00255
42	13	DUF2710 domain-containing protein	GCF_000007865	MAP_RS00225	0		MAP_RS00225	MAP4_RS19090	RC58_RS19055	RE97_RS19095	A0V42_RS00225	CEP84_RS03455	CEG92_RS00235	EC391_RS11420	EC390_RS11320	EGM63_RS06550	EGM64_RS03055	EGM60_RS23000	EGA31_RS00260
43	13	TIGR03084 family protein	GCF_000007865	MAP_RS00230	0		MAP_RS00230	MAP4_RS19085	RC58_RS19050	RE97_RS19090	A0V42_RS00230	CEP84_RS03450	CEG92_RS00240	EC391_RS11415	EC390_RS11325	EGM63_RS06545	EGM64_RS03060	EGM60_RS23005	EGA31_RS00265
44	13	MFS transporter	GCF_000007865	MAP_RS00235	0		MAP_RS00235	MAP4_RS19080	RC58_RS19045	RE97_RS19085	A0V42_RS00235	CEP84_RS03445	CEG92_RS00245	EC391_RS11410	EC390_RS11330	EGM63_RS06540	EGM64_RS03065	EGM60_RS23010	EGA31_RS00270
45	13	DUF179 domain-containing protein	GCF_000007865	MAP_RS00240	0		MAP_RS00240	MAP4_RS19075	RC58_RS19040	RE97_RS19080	A0V42_RS00240	CEP84_RS03440	CEG92_RS00250	EC391_RS11405	EC390_RS11335	EGM63_RS06535	EGM64_RS03070	EGM60_RS23015	EGA31_RS00275
46	13	hypothetical protein	GCF_000007865	MAP_RS00245	0		MAP_RS00245	MAP4_RS19070	RC58_RS19035	RE97_RS19075	A0V42_RS00245	CEP84_RS03435	CEG92_RS00255	EC391_RS11400	EC390_RS11340	EGM63_RS06530	EGM64_RS03075	EGM60_RS23020	EGA31_RS00280
48	13	leucine--tRNA ligase	GCF_000007865	MAP_RS00255	0		MAP_RS00255	MAP4_RS19060	RC58_RS19025	RE97_RS19065	A0V42_RS00255	CEP84_RS03425	CEG92_RS00265	EC391_RS11390	EC390_RS11350	EGM63_RS06520	EGM64_RS03085	EGM60_RS23030	EGA31_RS00290
49	13	short chain dehydrogenase	GCF_000007865	MAP_RS00260	0		MAP_RS00260	MAP4_RS19055	RC58_RS19020	RE97_RS19060	A0V42_RS00260	CEP84_RS03420	CEG92_RS00270	EC391_RS11385	EC390_RS11355	EGM63_RS06515	EGM64_RS03090	EGM60_RS23035	EGA31_RS00295
50	13	MarR family transcriptional regulator	GCF_000007865	MAP_RS00265	0		MAP_RS00265	MAP4_RS19050	RC58_RS19015	RE97_RS19055	A0V42_RS00265	CEP84_RS03415	CEG92_RS00275	EC391_RS11380	EC390_RS11360	EGM63_RS06510	EGM64_RS03095	EGM60_RS23040	EGA31_RS00300
52	13	amino acid ABC transporter permease	GCF_000007865	MAP_RS00275	0		MAP_RS00275	MAP4_RS19040	RC58_RS19005	RE97_RS19045	A0V42_RS00275	CEP84_RS03405	CEG92_RS00285	EC391_RS11370	EC390_RS11370	EGM63_RS06500	EGM64_RS03105	EGM60_RS23050	EGA31_RS00310
54	13	LLM class F420-dependent oxidoreductase	GCF_000007865	MAP_RS00285	0		MAP_RS00285	MAP4_RS19030	RC58_RS18995	RE97_RS19035	A0V42_RS00285	CEP84_RS03395	CEG92_RS00295	EC391_RS11360	EC390_RS11380	EGM63_RS06490	EGM64_RS03115	EGM60_RS00010	EGA31_RS00320
55	13	alpha/beta hydrolase	GCF_000007865	MAP_RS00290	0		MAP_RS00290	MAP4_RS19025	RC58_RS18990	RE97_RS19030	A0V42_RS00290	CEP84_RS03390	CEG92_RS00300	EC391_RS11355	EC390_RS11385	EGM63_RS06485	EGM64_RS03120	EGM60_RS00015	EGA31_RS00325
57	13	sugar phosphate isomerase/epimerase	GCF_000007865	MAP_RS00300	0		MAP_RS00300	MAP4_RS19015	RC58_RS18980	RE97_RS19020	A0V42_RS00300	CEP84_RS03380	CEG92_RS00310	EC391_RS11345	EC390_RS11395	EGM63_RS06475	EGM64_RS03130	EGM60_RS00025	EGA31_RS00335
58	13	sulfotransferase	GCF_000007865	MAP_RS00305	0		MAP_RS00305	MAP4_RS19010	RC58_RS18975	RE97_RS19015	A0V42_RS00305	CEP84_RS03375	CEG92_RS00315	EC391_RS11340	EC390_RS11400	EGM63_RS06470	EGM64_RS03135	EGM60_RS00030	EGA31_RS00340
59	13	LLM class flavin-dependent oxidoreductase	GCF_000007865	MAP_RS00310	0		MAP_RS00310	MAP4_RS19005	RC58_RS18970	RE97_RS19010	A0V42_RS00310	CEP84_RS03370	CEG92_RS00320	EC391_RS11335	EC390_RS11405	EGM63_RS06465	EGM64_RS03140	EGM60_RS00035	EGA31_RS00345
60	13	inositol-3-phosphate synthase	GCF_000007865	MAP_RS00315	0		MAP_RS00315	MAP4_RS19000	RC58_RS18965	RE97_RS19005	A0V42_RS00315	CEP84_RS03365	CEG92_RS00325	EC391_RS11330	EC390_RS11410	EGM63_RS06460	EGM64_RS03145	EGM60_RS00040	EGA31_RS00350
61	13	PadR family transcriptional regulator	GCF_000007865	MAP_RS00320	0		MAP_RS00320	MAP4_RS18995	RC58_RS18960	RE97_RS19000	A0V42_RS00320	CEP84_RS03360	CEG92_RS00330	EC391_RS11325	EC390_RS11415	EGM63_RS06455	EGM64_RS03150	EGM60_RS00045	EGA31_RS00355
62	13	DUF1707 domain-containing protein	GCF_000007865	MAP_RS00325	0		MAP_RS00325	MAP4_RS18990	RC58_RS18955	RE97_RS18995	A0V42_RS00325	CEP84_RS03355	CEG92_RS00335	EC391_RS11320	EC390_RS11420	EGM63_RS06450	EGM64_RS03155	EGM60_RS00050	EGA31_RS00360
63	13	hypothetical protein	GCF_000007865	MAP_RS00330	0		MAP_RS00330	MAP4_RS18985	RC58_RS18950	RE97_RS18990	A0V42_RS00330	CEP84_RS03350	CEG92_RS00340	EC391_RS11315	EC390_RS11425	EGM63_RS06445	EGM64_RS03160	EGM60_RS00055	EGA31_RS00365
65	13	DUF2029 domain-containing protein	GCF_000007865	MAP_RS00340	0		MAP_RS00340	MAP4_RS18975	RC58_RS18940	RE97_RS18980	A0V42_RS00340	CEP84_RS03340	CEG92_RS00350	EC391_RS11305	EC390_RS11435	EGM63_RS06435	EGM64_RS03170	EGM60_RS00065	EGA31_RS00375
66	13	DJ-1/PfpI family protein	GCF_000007865	MAP_RS00345	0		MAP_RS00345	MAP4_RS18970	RC58_RS18935	RE97_RS18975	A0V42_RS00345	CEP84_RS03335	CEG92_RS00355	EC391_RS11300	EC390_RS11440	EGM63_RS06430	EGM64_RS03175	EGM60_RS00070	EGA31_RS00380
67	13	30S ribosomal protein S6	GCF_000007865	MAP_RS00350	0		MAP_RS00350	MAP4_RS18965	RC58_RS18930	RE97_RS18970	A0V42_RS00350	CEP84_RS03330	CEG92_RS00360	EC391_RS11295	EC390_RS11445	EGM63_RS06425	EGM64_RS03180	EGM60_RS00075	EGA31_RS00385
68	13	single-stranded DNA-binding protein	GCF_000007865	MAP_RS00355	0		MAP_RS00355	MAP4_RS18960	RC58_RS18925	RE97_RS18965	A0V42_RS00355	CEP84_RS03325	CEG92_RS00365	EC391_RS11290	EC390_RS11450	EGM63_RS06420	EGM64_RS03185	EGM60_RS00080	EGA31_RS00390
69	13	30S ribosomal protein S18	GCF_000007865	MAP_RS00360	0		MAP_RS00360	MAP4_RS18955	RC58_RS18920	RE97_RS18960	A0V42_RS00360	CEP84_RS03320	CEG92_RS00370	EC391_RS11285	EC390_RS11455	EGM63_RS06415	EGM64_RS03190	EGM60_RS00085	EGA31_RS00395
70	13	50S ribosomal protein L9	GCF_000007865	MAP_RS00365	0		MAP_RS00365	MAP4_RS18950	RC58_RS18915	RE97_RS18955	A0V42_RS00365	CEP84_RS03315	CEG92_RS00375	EC391_RS11280	EC390_RS11460	EGM63_RS06410	EGM64_RS03195	EGM60_RS00090	EGA31_RS00400
71	13	replicative DNA helicase	GCF_000007865	MAP_RS00370	0		MAP_RS00370	MAP4_RS18945	RC58_RS18910	RE97_RS18950	A0V42_RS00370	CEP84_RS03310	CEG92_RS00380	EC391_RS11275	EC390_RS11465	EGM63_RS06405	EGM64_RS03200	EGM60_RS00095	EGA31_RS00405
72	13	glycerol acyltransferase	GCF_000007865	MAP_RS22370	0		MAP_RS22370	MAP4_RS22990	RC58_RS23060	RE97_RS23090	A0V42_RS22345	CEP84_RS03305	CEG92_RS00385	EC391_RS11270	EC390_RS11470	EGM63_RS06400	EGM64_RS03205	EGM60_RS00100	EGA31_RS00410
73	13	class I SAM-dependent methyltransferase	GCF_000007865	MAP_RS00380	0		MAP_RS00380	MAP4_RS18935	RC58_RS18900	RE97_RS18940	A0V42_RS00380	CEP84_RS03300	CEG92_RS00390	EC391_RS11265	EC390_RS11475	EGM63_RS06395	EGM64_RS03210	EGM60_RS00105	EGA31_RS00415
74	13	TetR family transcriptional regulator	GCF_000007865	MAP_RS00385	0		MAP_RS00385	MAP4_RS18930	RC58_RS18895	RE97_RS18935	A0V42_RS00385	CEP84_RS03295	CEG92_RS00395	EC391_RS11260	EC390_RS11480	EGM63_RS06390	EGM64_RS03215	EGM60_RS00110	EGA31_RS00420
75	13	ferric uptake regulation protein	GCF_000007865	MAP_RS22375	0		MAP_RS22375	MAP4_RS22985	RC58_RS23055	RE97_RS23085	A0V42_RS22350	CEP84_RS03290	CEG92_RS00400	EC391_RS11255	EC390_RS11485	EGM63_RS06385	EGM64_RS03220	EGM60_RS00115	EGA31_RS00425
76	13	hypothetical protein	GCF_000007865	MAP_RS00390	0		MAP_RS00390	MAP4_RS18925	RC58_RS18890	RE97_RS18930	A0V42_RS00390	CEP84_RS03285	CEG92_RS00405	EC391_RS11250	EC390_RS11490	EGM63_RS06380	EGM64_RS03225	EGM60_RS00120	EGA31_RS00430
77	13	MMPL family RND transporter	GCF_000007865	MAP_RS00395	0		MAP_RS00395	MAP4_RS18920	RC58_RS18885	RE97_RS18925	A0V42_RS00395	CEP84_RS03280	CEG92_RS00410	EC391_RS11245	EC390_RS11495	EGM63_RS06375	EGM64_RS03230	EGM60_RS00125	EGA31_RS00435
78	13	hypothetical protein	GCF_000007865	MAP_RS00400	0		MAP_RS00400	MAP4_RS18915	RC58_RS18880	RE97_RS18920	A0V42_RS00400	CEP84_RS03275	CEG92_RS00415	EC391_RS11240	EC390_RS11500	EGM63_RS06370	EGM64_RS03235	EGM60_RS00130	EGA31_RS00440
79	13	hypothetical protein	GCF_000007865	MAP_RS00405	0		MAP_RS00405	MAP4_RS18910	RC58_RS18875	RE97_RS18915	A0V42_RS00405	CEP84_RS03270	CEG92_RS00420	EC391_RS11235	EC390_RS11505	EGM63_RS06365	EGM64_RS03240	EGM60_RS00135	EGA31_RS00445
80	13	NAD(P)-dependent oxidoreductase	GCF_000007865	MAP_RS00410	0		MAP_RS00410	MAP4_RS18905	RC58_RS18870	RE97_RS18910	A0V42_RS00410	CEP84_RS03265	CEG92_RS00425	EC391_RS11230	EC390_RS11510	EGM63_RS06360	EGM64_RS03245	EGM60_RS00140	EGA31_RS00450
81	13	DUF5134 domain-containing protein	GCF_000007865	MAP_RS00415	0		MAP_RS00415	MAP4_RS18900	RC58_RS18865	RE97_RS18905	A0V42_RS00415	CEP84_RS03260	CEG92_RS00430	EC391_RS11225	EC390_RS11515	EGM63_RS06355	EGM64_RS03250	EGM60_RS00145	EGA31_RS00455
82	13	FAD-binding oxidoreductase	GCF_000007865	MAP_RS00420	0		MAP_RS00420	MAP4_RS18895	RC58_RS18860	RE97_RS18900	A0V42_RS00420	CEP84_RS03255	CEG92_RS00435	EC391_RS11220	EC390_RS11520	EGM63_RS06350	EGM64_RS03255	EGM60_RS00150	EGA31_RS00460
83	13	Crp/Fnr family transcriptional regulator	GCF_000007865	MAP_RS00425	0		MAP_RS00425	MAP4_RS18890	RC58_RS18855	RE97_RS18895	A0V42_RS00425	CEP84_RS03250	CEG92_RS00440	EC391_RS11215	EC390_RS11525	EGM63_RS06345	EGM64_RS03260	EGM60_RS00155	EGA31_RS00465
84	13	hypothetical protein	GCF_000007865	MAP_RS00430	0		MAP_RS00430	MAP4_RS18885	RC58_RS18850	RE97_RS18890	A0V42_RS00430	CEP84_RS03245	CEG92_RS00445	EC391_RS11210	EC390_RS11530	EGM63_RS06340	EGM64_RS03265	EGM60_RS00160	EGA31_RS00470
85	13	alpha/beta hydrolase	GCF_000007865	MAP_RS00435	0		MAP_RS00435	MAP4_RS18880	RC58_RS18845	RE97_RS18885	A0V42_RS00435	CEP84_RS03240	CEG92_RS00450	EC391_RS11205	EC390_RS11535	EGM63_RS06335	EGM64_RS03270	EGM60_RS00165	EGA31_RS00475
86	13	LysR family transcriptional regulator	GCF_000007865	MAP_RS00440	0		MAP_RS00440	MAP4_RS18875	RC58_RS18840	RE97_RS18880	A0V42_RS00440	CEP84_RS03235	CEG92_RS00455	EC391_RS11200	EC390_RS11540	EGM63_RS06330	EGM64_RS03275	EGM60_RS00170	EGA31_RS00480
87	13	EamA/RhaT family transporter	GCF_000007865	MAP_RS00445	0		MAP_RS00445	MAP4_RS18870	RC58_RS18835	RE97_RS18875	A0V42_RS00445	CEP84_RS03230	CEG92_RS00460	EC391_RS11195	EC390_RS11545	EGM63_RS06325	EGM64_RS03280	EGM60_RS00175	EGA31_RS00485
88	13	DUF3298 domain-containing protein	GCF_000007865	MAP_RS00450	0		MAP_RS00450	MAP4_RS18865	RC58_RS18830	RE97_RS18870	A0V42_RS00450	CEP84_RS03225	CEG92_RS00465	EC391_RS11190	EC390_RS11550	EGM63_RS06320	EGM64_RS03285	EGM60_RS00180	EGA31_RS00490
89	13	DUF4440 domain-containing protein	GCF_000007865	MAP_RS00455	0		MAP_RS00455	MAP4_RS18860	RC58_RS18825	RE97_RS18865	A0V42_RS00455	CEP84_RS03220	CEG92_RS00470	EC391_RS11185	EC390_RS11555	EGM63_RS06315	EGM64_RS03290	EGM60_RS00185	EGA31_RS00495
90	13	N-acetyltransferase	GCF_000007865	MAP_RS00460	0		MAP_RS00460	MAP4_RS18855	RC58_RS18820	RE97_RS18860	A0V42_RS00460	CEP84_RS03215	CEG92_RS00475	EC391_RS11180	EC390_RS11560	EGM63_RS06310	EGM64_RS03295	EGM60_RS00190	EGA31_RS00500
91	13	hypothetical protein	GCF_000007865	MAP_RS00465	0		MAP_RS00465	MAP4_RS18850	RC58_RS18815	RE97_RS18855	A0V42_RS00465	CEP84_RS03210	CEG92_RS00480	EC391_RS11175	EC390_RS11565	EGM63_RS06305	EGM64_RS03300	EGM60_RS00195	EGA31_RS00505
92	13	hypothetical protein	GCF_000007865	MAP_RS00470	0		MAP_RS00470	MAP4_RS18845	RC58_RS18810	RE97_RS18850	A0V42_RS00470	CEP84_RS03205	CEG92_RS00485	EC391_RS11170	EC390_RS11570	EGM63_RS06300	EGM64_RS03305	EGM60_RS00200	EGA31_RS00510
93	13	ABC transporter permease	GCF_000007865	MAP_RS00475	0		MAP_RS00475	MAP4_RS18840	RC58_RS18805	RE97_RS18845	A0V42_RS00475	CEP84_RS03200	CEG92_RS00490	EC391_RS11165	EC390_RS11575	EGM63_RS06295	EGM64_RS03310	EGM60_RS00205	EGA31_RS00515
94	13	ABC transporter permease	GCF_000007865	MAP_RS00480	0		MAP_RS00480	MAP4_RS18835	RC58_RS18800	RE97_RS18840	A0V42_RS00480	CEP84_RS03195	CEG92_RS00495	EC391_RS11160	EC390_RS11580	EGM63_RS06290	EGM64_RS03315	EGM60_RS00210	EGA31_RS00520
95	13	hypothetical protein	GCF_000007865	MAP_RS00485	0		MAP_RS00485	MAP4_RS18830	RC58_RS18795	RE97_RS18835	A0V42_RS00485	CEP84_RS03190	CEG92_RS00500	EC391_RS11155	EC390_RS11585	EGM63_RS06285	EGM64_RS03320	EGM60_RS00215	EGA31_RS00525
96	13	NADH-quinone oxidoreductase subunit I 1	GCF_000007865	MAP_RS00490	0		MAP_RS00490	MAP4_RS18825	RC58_RS18790	RE97_RS18830	A0V42_RS00490	CEP84_RS03185	CEG92_RS00505	EC391_RS11150	EC390_RS11590	EGM63_RS06280	EGM64_RS03325	EGM60_RS00220	EGA31_RS00530
100	13	hypothetical protein	GCF_000007865	MAP_RS00515	0		MAP_RS00515	MAP4_RS18805	RC58_RS18765	RE97_RS18805	A0V42_RS00515	CEP84_RS03155	CEG92_RS00535	EC391_RS11120	EC390_RS11620	EGM63_RS06245	EGM64_RS03360	EGM60_RS00255	EGA31_RS00565
101	13	hypothetical protein	GCF_000007865	MAP_RS00520	0		MAP_RS00520	MAP4_RS18800	RC58_RS18760	RE97_RS18800	A0V42_RS00520	CEP84_RS03150	CEG92_RS00540	EC391_RS11115	EC390_RS11625	EGM63_RS06240	EGM64_RS03365	EGM60_RS00260	EGA31_RS00570
102	13	hypothetical protein	GCF_000007865	MAP_RS22390	0		MAP_RS22390	MAP4_RS22975	RC58_RS23040	RE97_RS23070	A0V42_RS22360	CEP84_RS03145	CEG92_RS00545	EC391_RS11110	EC390_RS11630	EGM63_RS06235	EGM64_RS03370	EGM60_RS00265	EGA31_RS00575
103	13	hypothetical protein	GCF_000007865	MAP_RS00525	0		MAP_RS00525	MAP4_RS18795	RC58_RS18755	RE97_RS18795	A0V42_RS00525	CEP84_RS03140	CEG92_RS00550	EC391_RS11105	EC390_RS11635	EGM63_RS06230	EGM64_RS03375	EGM60_RS00270	EGA31_RS00580
104	13	IS256 family transposase	GCF_000007865	MAP_RS00530	0	FG-In	MAP_RS00530	MAP4_RS18790	RC58_RS18750	RE97_RS18790	A0V42_RS00530	CEP84_RS03135	CEG92_RS00555	EC391_RS11100	EC390_RS11640	EGM63_RS06225	EGM64_RS03380	EGM60_RS00275	EGA31_RS00585
107	13	XRE family transcriptional regulator	GCF_000007865	MAP_RS00540	0		MAP_RS00540	MAP4_RS18780	RC58_RS18740	RE97_RS18780	A0V42_RS00540	CEP84_RS03125	CEG92_RS00570	EC391_RS11090	EC390_RS11650	EGM63_RS06215	EGM64_RS03390	EGM60_RS00285	EGA31_RS00595
108	13	integrase	GCF_000007865	MAP_RS00545	0		MAP_RS00545	MAP4_RS18775	RC58_RS18735	RE97_RS18775	A0V42_RS00545	CEP84_RS03120	CEG92_RS00575	EC391_RS11085	EC390_RS11655	EGM63_RS06210	EGM64_RS03395	EGM60_RS00290	EGA31_RS00600
110	13	MCE family protein	GCF_000007865	MAP_RS00555	0		MAP_RS00555	MAP4_RS18765	RC58_RS18725	RE97_RS18765	A0V42_RS00555	CEP84_RS03110	CEG92_RS00585	EC391_RS11075	EC390_RS11665	EGM63_RS06200	EGM64_RS03405	EGM60_RS00300	EGA31_RS00610
111	13	MCE family protein	GCF_000007865	MAP_RS00560	0		MAP_RS00560	MAP4_RS18760	RC58_RS18720	RE97_RS18760	A0V42_RS00560	CEP84_RS03105	CEG92_RS00590	EC391_RS11070	EC390_RS11670	EGM63_RS06195	EGM64_RS03410	EGM60_RS00305	EGA31_RS00615
112	13	MCE family protein	GCF_000007865	MAP_RS00565	0		MAP_RS00565	MAP4_RS18755	RC58_RS18715	RE97_RS18755	A0V42_RS00565	CEP84_RS03100	CEG92_RS00595	EC391_RS11065	EC390_RS11675	EGM63_RS06190	EGM64_RS03415	EGM60_RS00310	EGA31_RS00620
113	13	MCE family protein	GCF_000007865	MAP_RS00570	0		MAP_RS00570	MAP4_RS18750	RC58_RS18710	RE97_RS18750	A0V42_RS00570	CEP84_RS03095	CEG92_RS00600	EC391_RS11060	EC390_RS11680	EGM63_RS06185	EGM64_RS03420	EGM60_RS00315	EGA31_RS00625
114	13	MCE family protein	GCF_000007865	MAP_RS00575	0		MAP_RS00575	MAP4_RS18745	RC58_RS18705	RE97_RS18745	A0V42_RS00575	CEP84_RS03090	CEG92_RS00605	EC391_RS11055	EC390_RS11685	EGM63_RS06180	EGM64_RS03425	EGM60_RS00320	EGA31_RS00630
115	13	MCE family protein	GCF_000007865	MAP_RS00580	0		MAP_RS00580	MAP4_RS18740	RC58_RS18700	RE97_RS18740	A0V42_RS00580	CEP84_RS03085	CEG92_RS00610	EC391_RS11050	EC390_RS11690	EGM63_RS06175	EGM64_RS03430	EGM60_RS00325	EGA31_RS00635
116	13	hypothetical protein	GCF_000007865	MAP_RS00585	0		MAP_RS00585	MAP4_RS18735	RC58_RS18695	RE97_RS18735	A0V42_RS00585	CEP84_RS03080	CEG92_RS00615	EC391_RS11045	EC390_RS11695	EGM63_RS06170	EGM64_RS03435	EGM60_RS00330	EGA31_RS00640
117	13	DUF3298 domain-containing protein	GCF_000007865	MAP_RS00590	0		MAP_RS00590	MAP4_RS18730	RC58_RS18690	RE97_RS18730	A0V42_RS00590	CEP84_RS03075	CEG92_RS00620	EC391_RS11040	EC390_RS11700	EGM63_RS06165	EGM64_RS03440	EGM60_RS00335	EGA31_RS00645
118	13	TetR family transcriptional regulator	GCF_000007865	MAP_RS00595	0		MAP_RS00595	MAP4_RS18725	RC58_RS18685	RE97_RS18725	A0V42_RS00595	CEP84_RS03070	CEG92_RS00625	EC391_RS11035	EC390_RS11705	EGM63_RS06160	EGM64_RS03445	EGM60_RS00340	EGA31_RS00650
119	13	hypothetical protein	GCF_000007865	MAP_RS00600	0		MAP_RS00600	MAP4_RS18720	RC58_RS18680	RE97_RS18720	A0V42_RS00600	CEP84_RS03065	CEG92_RS00630	EC391_RS11030	EC390_RS11710	EGM63_RS06155	EGM64_RS03450	EGM60_RS00345	EGA31_RS00655
120	13	hypothetical protein	GCF_000007865	MAP_RS00605	0		MAP_RS00605	MAP4_RS18715	RC58_RS18675	RE97_RS18715	A0V42_RS00605	CEP84_RS03060	CEG92_RS00635	EC391_RS11025	EC390_RS11715	EGM63_RS06150	EGM64_RS03455	EGM60_RS00350	EGA31_RS00660
121	13	hypothetical protein	GCF_000007865	MAP_RS00610	0		MAP_RS00610	MAP4_RS18710	RC58_RS18670	RE97_RS18710	A0V42_RS00610	CEP84_RS03055	CEG92_RS00640	EC391_RS11020	EC390_RS11720	EGM63_RS06145	EGM64_RS03460	EGM60_RS00355	EGA31_RS00665
122	13	hypothetical protein	GCF_000007865	MAP_RS00615	0		MAP_RS00615	MAP4_RS18705	RC58_RS18665	RE97_RS18705	A0V42_RS00615	CEP84_RS03050	CEG92_RS00645	EC391_RS11015	EC390_RS11725	EGM63_RS06140	EGM64_RS03465	EGM60_RS00360	EGA31_RS00670
123	13	hypothetical protein	GCF_000007865	MAP_RS00620	0		MAP_RS00620	MAP4_RS18700	RC58_RS18660	RE97_RS18700	A0V42_RS00620	CEP84_RS03045	CEG92_RS00650	EC391_RS11010	EC390_RS11730	EGM63_RS06135	EGM64_RS03470	EGM60_RS00365	EGA31_RS00675
124	13	PE family protein	GCF_000007865	MAP_RS00625	0		MAP_RS00625	MAP4_RS18695	RC58_RS18655	RE97_RS18695	A0V42_RS00625	CEP84_RS03040	CEG92_RS00655	EC391_RS11005	EC390_RS11735	EGM63_RS06130	EGM64_RS03475	EGM60_RS00370	EGA31_RS00680
125	13	class I SAM-dependent methyltransferase	GCF_000007865	MAP_RS00635	0		MAP_RS00635	MAP4_RS18685	RC58_RS18645	RE97_RS18685	A0V42_RS00635	CEP84_RS03030	CEG92_RS00665	EC391_RS10995	EC390_RS11745	EGM63_RS06120	EGM64_RS03485	EGM60_RS00380	EGA31_RS00690
126	13	nitroreductase family deazaflavin-dependent oxidoreductase	GCF_000007865	MAP_RS00640	0		MAP_RS00640	MAP4_RS18680	RC58_RS18640	RE97_RS18680	A0V42_RS00640	CEP84_RS03025	CEG92_RS00670	EC391_RS10990	EC390_RS11750	EGM63_RS06115	EGM64_RS03490	EGM60_RS00385	EGA31_RS00695
127	13	SulP family inorganic anion transporter	GCF_000007865	MAP_RS00645	0		MAP_RS00645	MAP4_RS18675	RC58_RS18635	RE97_RS18675	A0V42_RS00645	CEP84_RS03020	CEG92_RS00675	EC391_RS10985	EC390_RS11755	EGM63_RS06110	EGM64_RS03495	EGM60_RS00390	EGA31_RS00700
128	13	TIGR03619 family F420-dependent LLM class oxidoreductase	GCF_000007865	MAP_RS00650	0		MAP_RS00650	MAP4_RS18670	RC58_RS18630	RE97_RS18670	A0V42_RS00650	CEP84_RS03015	CEG92_RS00680	EC391_RS10980	EC390_RS11760	EGM63_RS06105	EGM64_RS03500	EGM60_RS00395	EGA31_RS00705
129	13	2-hydroxyacid dehydrogenase	GCF_000007865	MAP_RS00655	0		MAP_RS00655	MAP4_RS18665	RC58_RS18625	RE97_RS18665	A0V42_RS00655	CEP84_RS03010	CEG92_RS00685	EC391_RS10975	EC390_RS11765	EGM63_RS06100	EGM64_RS03505	EGM60_RS00400	EGA31_RS00710
130	13	ATP-binding protein	GCF_000007865	MAP_RS00660	0		MAP_RS00660	MAP4_RS18660	RC58_RS18620	RE97_RS18660	A0V42_RS00660	CEP84_RS03005	CEG92_RS00690	EC391_RS10970	EC390_RS11770	EGM63_RS06095	EGM64_RS03510	EGM60_RS00405	EGA31_RS00715
132	13	phosphate transport system regulatory protein PhoU	GCF_000007865	MAP_RS00670	0		MAP_RS00670	MAP4_RS18650	RC58_RS18610	RE97_RS18650	A0V42_RS00670	CEP84_RS02995	CEG92_RS00700	EC391_RS10960	EC390_RS11780	EGM63_RS06085	EGM64_RS03520	EGM60_RS00415	EGA31_RS00725
133	13	MFS transporter	GCF_000007865	MAP_RS00675	0		MAP_RS00675	MAP4_RS18645	RC58_RS18605	RE97_RS18645	A0V42_RS00675	CEP84_RS02990	CEG92_RS00705	EC391_RS10955	EC390_RS11785	EGM63_RS06080	EGM64_RS03525	EGM60_RS00420	EGA31_RS00730
134	13	hemerythrin domain-containing protein	GCF_000007865	MAP_RS00680	0		MAP_RS00680	MAP4_RS18640	RC58_RS18600	RE97_RS18640	A0V42_RS00680	CEP84_RS02985	CEG92_RS00710	EC391_RS10950	EC390_RS11790	EGM63_RS06075	EGM64_RS03530	EGM60_RS00425	EGA31_RS00735
135	13	class I SAM-dependent methyltransferase	GCF_000007865	MAP_RS00685	0		MAP_RS00685	MAP4_RS18635	RC58_RS18595	RE97_RS18635	A0V42_RS00685	CEP84_RS02980	CEG92_RS00715	EC391_RS10945	EC390_RS11795	EGM63_RS06070	EGM64_RS03535	EGM60_RS00430	EGA31_RS00740
136	13	VOC family protein	GCF_000007865	MAP_RS00690	0		MAP_RS00690	MAP4_RS18630	RC58_RS18590	RE97_RS18630	A0V42_RS00690	CEP84_RS02975	CEG92_RS00720	EC391_RS10940	EC390_RS11800	EGM63_RS06065	EGM64_RS03540	EGM60_RS00435	EGA31_RS00745
137	13	hypothetical protein	GCF_000007865	MAP_RS00695	0		MAP_RS00695	MAP4_RS18625	RC58_RS18585	RE97_RS18625	A0V42_RS00695	CEP84_RS02970	CEG92_RS00725	EC391_RS10935	EC390_RS11805	EGM63_RS06060	EGM64_RS03545	EGM60_RS00440	EGA31_RS00750
139	13	PadR family transcriptional regulator	GCF_000007865	MAP_RS00705	0		MAP_RS00705	MAP4_RS18615	RC58_RS18575	RE97_RS18615	A0V42_RS00705	CEP84_RS02960	CEG92_RS00735	EC391_RS10925	EC390_RS11815	EGM63_RS06050	EGM64_RS03555	EGM60_RS00450	EGA31_RS00760
140	13	nuclear transport factor 2 family protein	GCF_000007865	MAP_RS00710	0		MAP_RS00710	MAP4_RS18610	RC58_RS18570	RE97_RS18610	A0V42_RS00710	CEP84_RS02955	CEG92_RS00740	EC391_RS10920	EC390_RS11820	EGM63_RS06045	EGM64_RS03560	EGM60_RS00455	EGA31_RS00765
141	13	LLM class F420-dependent oxidoreductase	GCF_000007865	MAP_RS00715	0		MAP_RS00715	MAP4_RS18605	RC58_RS18565	RE97_RS18605	A0V42_RS00715	CEP84_RS02950	CEG92_RS00745	EC391_RS10915	EC390_RS11825	EGM63_RS06040	EGM64_RS03565	EGM60_RS00460	EGA31_RS00770
142	13	hypothetical protein	GCF_000007865	MAP_RS00725	0		MAP_RS00725	MAP4_RS18595	RC58_RS18555	RE97_RS18595	A0V42_RS00725	CEP84_RS02940	CEG92_RS00755	EC391_RS10905	EC390_RS11835	EGM63_RS06030	EGM64_RS03575	EGM60_RS00470	EGA31_RS00780
144	13	aliphatic sulfonate ABC transporter substrate-binding protein	GCF_000007865	MAP_RS00735	0		MAP_RS00735	MAP4_RS18585	RC58_RS18545	RE97_RS18585	A0V42_RS00735	CEP84_RS02930	CEG92_RS00765	EC391_RS10895	EC390_RS11845	EGM63_RS06020	EGM64_RS03585	EGM60_RS00480	EGA31_RS00790
145	13	ABC transporter permease	GCF_000007865	MAP_RS00740	0		MAP_RS00740	MAP4_RS18580	RC58_RS18540	RE97_RS18580	A0V42_RS00740	CEP84_RS02925	CEG92_RS00770	EC391_RS10890	EC390_RS11850	EGM63_RS06015	EGM64_RS03590	EGM60_RS00485	EGA31_RS00795
146	13	FAD-binding oxidoreductase	GCF_000007865	MAP_RS00745	0		MAP_RS00745	MAP4_RS18575	RC58_RS18535	RE97_RS18575	A0V42_RS00745	CEP84_RS02920	CEG92_RS00775	EC391_RS10885	EC390_RS11855	EGM63_RS06010	EGM64_RS03595	EGM60_RS00490	EGA31_RS00800
147	13	acyl-CoA dehydrogenase	GCF_000007865	MAP_RS00760	0		MAP_RS00760	MAP4_RS18560	RC58_RS18520	RE97_RS18560	A0V42_RS00760	CEP84_RS02910	CEG92_RS00785	EC391_RS10875	EC390_RS11865	EGM63_RS06000	EGM64_RS03605	EGM60_RS00500	EGA31_RS00810
148	13	sensor histidine kinase	GCF_000007865	MAP_RS00770	0		MAP_RS00770	MAP4_RS18550	RC58_RS18510	RE97_RS18550	A0V42_RS00770	CEP84_RS02900	CEG92_RS00795	EC391_RS10865	EC390_RS11875	EGM63_RS05990	EGM64_RS03615	EGM60_RS00510	EGA31_RS00820
149	13	enoyl-CoA hydratase/isomerase family protein	GCF_000007865	MAP_RS00775	0		MAP_RS00775	MAP4_RS18545	RC58_RS18505	RE97_RS18545	A0V42_RS00775	CEP84_RS02895	CEG92_RS00800	EC391_RS10860	EC390_RS11880	EGM63_RS05985	EGM64_RS03620	EGM60_RS00515	EGA31_RS00825
150	13	TetR family transcriptional regulator	GCF_000007865	MAP_RS00780	0		MAP_RS00780	MAP4_RS18540	RC58_RS18500	RE97_RS18540	A0V42_RS00780	CEP84_RS02890	CEG92_RS00805	EC391_RS10855	EC390_RS11885	EGM63_RS05980	EGM64_RS03625	EGM60_RS00520	EGA31_RS00830
151	13	extradiol dioxygenase	GCF_000007865	MAP_RS00785	0		MAP_RS00785	MAP4_RS18535	RC58_RS18495	RE97_RS18535	A0V42_RS00785	CEP84_RS02885	CEG92_RS00810	EC391_RS10850	EC390_RS11890	EGM63_RS05975	EGM64_RS03630	EGM60_RS00525	EGA31_RS00835
152	13	PE family protein	GCF_000007865	MAP_RS00790	0		MAP_RS00790	MAP4_RS18530	RC58_RS18490	RE97_RS18530	A0V42_RS00790	CEP84_RS02880	CEG92_RS00815	EC391_RS10845	EC390_RS11895	EGM63_RS05970	EGM64_RS03635	EGM60_RS00530	EGA31_RS00840
153	13	PPE family protein	GCF_000007865	MAP_RS00795	0		MAP_RS00795	MAP4_RS18525	RC58_RS18485	RE97_RS18525	A0V42_RS00795	CEP84_RS02875	CEG92_RS00820	EC391_RS10840	EC390_RS11900	EGM63_RS05965	EGM64_RS03640	EGM60_RS00535	EGA31_RS00845
155	13	EsxD	GCF_000007865	MAP_RS00805	0		MAP_RS00805	MAP4_RS18515	RC58_RS18475	RE97_RS18515	A0V42_RS00805	CEP84_RS02860	CEG92_RS00830	EC391_RS10825	EC390_RS11915	EGM63_RS05950	EGM64_RS03655	EGM60_RS00550	EGA31_RS00860
156	13	secretion protein	GCF_000007865	MAP_RS00810	0		MAP_RS00810	MAP4_RS18510	RC58_RS18470	RE97_RS18510	A0V42_RS00810	CEP84_RS02855	CEG92_RS00835	EC391_RS10820	EC390_RS11920	EGM63_RS05945	EGM64_RS03660	EGM60_RS00555	EGA31_RS00865
157	13	ESX secretion-associated protein EspG	GCF_000007865	MAP_RS00815	0		MAP_RS00815	MAP4_RS18505	RC58_RS18465	RE97_RS18505	A0V42_RS00815	CEP84_RS02850	CEG92_RS00840	EC391_RS10815	EC390_RS11925	EGM63_RS05940	EGM64_RS03665	EGM60_RS00560	EGA31_RS00870
159	13	type VII secretion integral membrane protein EccD	GCF_000007865	MAP_RS00825	0		MAP_RS00825	MAP4_RS18495	RC58_RS18455	RE97_RS18495	A0V42_RS00825	CEP84_RS02840	CEG92_RS00850	EC391_RS10805	EC390_RS11935	EGM63_RS05930	EGM64_RS03675	EGM60_RS00570	EGA31_RS00880
161	13	type VII secretion system ESX-2 AAA family ATPase EccA2	GCF_000007865	MAP_RS00840	0		MAP_RS00840	MAP4_RS18480	RC58_RS18440	RE97_RS18480	A0V42_RS00840	CEP84_RS02825	CEG92_RS00865	EC391_RS10790	EC390_RS11950	EGM63_RS05915	EGM64_RS03690	EGM60_RS00585	EGA31_RS00895
162	13	nitroreductase family deazaflavin-dependent oxidoreductase	GCF_000007865	MAP_RS00845	0		MAP_RS00845	MAP4_RS18475	RC58_RS18435	RE97_RS18475	A0V42_RS00845	CEP84_RS02820	CEG92_RS00870	EC391_RS10785	EC390_RS11955	EGM63_RS05910	EGM64_RS03695	EGM60_RS00590	EGA31_RS00900
163	13	nucleotide-diphosphate-sugar epimerase	GCF_000007865	MAP_RS00850	0		MAP_RS00850	MAP4_RS18470	RC58_RS18430	RE97_RS18470	A0V42_RS00850	CEP84_RS02815	CEG92_RS00875	EC391_RS10780	EC390_RS11960	EGM63_RS05905	EGM64_RS03700	EGM60_RS00595	EGA31_RS00905
164	13	RNA polymerase sigma factor SigI	GCF_000007865	MAP_RS00855	0		MAP_RS00855	MAP4_RS18465	RC58_RS18425	RE97_RS18465	A0V42_RS00855	CEP84_RS02810	CEG92_RS00880	EC391_RS10775	EC390_RS11965	EGM63_RS05900	EGM64_RS03705	EGM60_RS00600	EGA31_RS00910
165	13	MinD/ParA family protein	GCF_000007865	MAP_RS00860	0		MAP_RS00860	MAP4_RS18460	RC58_RS18420	RE97_RS18460	A0V42_RS00860	CEP84_RS02805	CEG92_RS00885	EC391_RS10770	EC390_RS11970	EGM63_RS05895	EGM64_RS03710	EGM60_RS00605	EGA31_RS00915
166	13	glutamate synthase large subunit	GCF_000007865	MAP_RS00865	0		MAP_RS00865	MAP4_RS18455	RC58_RS18415	RE97_RS18455	A0V42_RS00865	CEP84_RS02800	CEG92_RS00890	EC391_RS10765	EC390_RS11975	EGM63_RS05890	EGM64_RS03715	EGM60_RS00610	EGA31_RS00920
167	13	glutamate synthase subunit beta	GCF_000007865	MAP_RS00870	0		MAP_RS00870	MAP4_RS18450	RC58_RS18410	RE97_RS18450	A0V42_RS00870	CEP84_RS02795	CEG92_RS00895	EC391_RS10760	EC390_RS11980	EGM63_RS05885	EGM64_RS03720	EGM60_RS00615	EGA31_RS00925
169	13	TIGR03560 family F420-dependent LLM class oxidoreductase	GCF_000007865	MAP_RS00875	0		MAP_RS00875	MAP4_RS18445	RC58_RS18405	RE97_RS18445	A0V42_RS00875	CEP84_RS02790	CEG92_RS00905	EC391_RS10755	EC390_RS11985	EGM63_RS05880	EGM64_RS03725	EGM60_RS00620	EGA31_RS00930
170	13	hypothetical protein	GCF_000007865	MAP_RS00880	0		MAP_RS00880	MAP4_RS18440	RC58_RS18400	RE97_RS18440	A0V42_RS00880	CEP84_RS02785	CEG92_RS00910	EC391_RS10750	EC390_RS11990	EGM63_RS05875	EGM64_RS03730	EGM60_RS00625	EGA31_RS00935
171	13	PHP domain-containing protein	GCF_000007865	MAP_RS00885	0		MAP_RS00885	MAP4_RS18435	RC58_RS18395	RE97_RS18435	A0V42_RS00885	CEP84_RS02780	CEG92_RS00915	EC391_RS10745	EC390_RS11995	EGM63_RS05870	EGM64_RS03735	EGM60_RS00630	EGA31_RS00940
172	13	DNA polymerase IV	GCF_000007865	MAP_RS00890	0		MAP_RS00890	MAP4_RS18430	RC58_RS18390	RE97_RS18430	A0V42_RS00890	CEP84_RS02775	CEG92_RS00920	EC391_RS10740	EC390_RS12000	EGM63_RS05865	EGM64_RS03740	EGM60_RS00635	EGA31_RS00945
173	13	TetR/AcrR family transcriptional regulator	GCF_000007865	MAP_RS00895	0		MAP_RS00895	MAP4_RS18425	RC58_RS18385	RE97_RS18425	A0V42_RS00895	CEP84_RS02770	CEG92_RS00925	EC391_RS10735	EC390_RS12005	EGM63_RS05860	EGM64_RS03745	EGM60_RS00640	EGA31_RS00950
174	13	NAD(P)/FAD-dependent oxidoreductase	GCF_000007865	MAP_RS00900	0		MAP_RS00900	MAP4_RS18420	RC58_RS18380	RE97_RS18420	A0V42_RS00900	CEP84_RS02765	CEG92_RS00930	EC391_RS10730	EC390_RS12010	EGM63_RS05855	EGM64_RS03750	EGM60_RS00645	EGA31_RS00955
175	13	ribonuclease	GCF_000007865	MAP_RS00905	0		MAP_RS00905	MAP4_RS18415	RC58_RS18375	RE97_RS18415	A0V42_RS00905	CEP84_RS02760	CEG92_RS00935	EC391_RS10725	EC390_RS12015	EGM63_RS05850	EGM64_RS03755	EGM60_RS00650	EGA31_RS00960
176	13	hypothetical protein	GCF_000007865	MAP_RS00910	0		MAP_RS00910	MAP4_RS18410	RC58_RS18370	RE97_RS18410	A0V42_RS00910	CEP84_RS02755	CEG92_RS00940	EC391_RS10720	EC390_RS12020	EGM63_RS05845	EGM64_RS03760	EGM60_RS00655	EGA31_RS00965
179	13	hypothetical protein	GCF_000007865	MAP_RS00925	0		MAP_RS00925	MAP4_RS18395	RC58_RS18360	RE97_RS18395	A0V42_RS00925	CEP84_RS02740	CEG92_RS00955	EC391_RS10705	EC390_RS12035	EGM63_RS05830	EGM64_RS03775	EGM60_RS00670	EGA31_RS00980
180	13	transcriptional regulator	GCF_000007865	MAP_RS00930	0		MAP_RS00930	MAP4_RS18390	RC58_RS18355	RE97_RS18390	A0V42_RS00930	CEP84_RS02735	CEG92_RS00960	EC391_RS10700	EC390_RS12040	EGM63_RS05825	EGM64_RS03780	EGM60_RS00675	EGA31_RS00985
182	13	superoxide dismutase [Mn]	GCF_000007865	MAP_RS00940	0		MAP_RS00940	MAP4_RS18380	RC58_RS18345	RE97_RS18380	A0V42_RS00940	CEP84_RS02725	CEG92_RS00970	EC391_RS10690	EC390_RS12050	EGM63_RS05815	EGM64_RS03790	EGM60_RS00685	EGA31_RS00995
183	13	DUF4328 domain-containing protein	GCF_000007865	MAP_RS00945	0		MAP_RS00945	MAP4_RS18375	RC58_RS18340	RE97_RS18375	A0V42_RS00945	CEP84_RS02720	CEG92_RS00975	EC391_RS10685	EC390_RS12055	EGM63_RS05810	EGM64_RS03795	EGM60_RS00690	EGA31_RS01000
184	13	glycerophosphodiester phosphodiesterase	GCF_000007865	MAP_RS00950	0		MAP_RS00950	MAP4_RS18370	RC58_RS18335	RE97_RS18370	A0V42_RS00950	CEP84_RS02715	CEG92_RS00980	EC391_RS10680	EC390_RS12060	EGM63_RS05805	EGM64_RS03800	EGM60_RS00695	EGA31_RS01005
185	13	LytR family transcriptional regulator	GCF_000007865	MAP_RS00955	0		MAP_RS00955	MAP4_RS18365	RC58_RS18330	RE97_RS18365	A0V42_RS00955	CEP84_RS02710	CEG92_RS00985	EC391_RS10675	EC390_RS12065	EGM63_RS05800	EGM64_RS03805	EGM60_RS00700	EGA31_RS01010
186	13	DUF2470 domain-containing protein	GCF_000007865	MAP_RS00960	0		MAP_RS00960	MAP4_RS18360	RC58_RS18325	RE97_RS18360	A0V42_RS00960	CEP84_RS02705	CEG92_RS00990	EC391_RS10670	EC390_RS12070	EGM63_RS05795	EGM64_RS03810	EGM60_RS00705	EGA31_RS01015
187	13	prephenate dehydratase	GCF_000007865	MAP_RS00965	0		MAP_RS00965	MAP4_RS18355	RC58_RS18320	RE97_RS18355	A0V42_RS00965	CEP84_RS02700	CEG92_RS00995	EC391_RS10665	EC390_RS12075	EGM63_RS05790	EGM64_RS03815	EGM60_RS00710	EGA31_RS01020
188	13	histidine phosphatase family protein	GCF_000007865	MAP_RS00970	0		MAP_RS00970	MAP4_RS18350	RC58_RS18315	RE97_RS18350	A0V42_RS00970	CEP84_RS02695	CEG92_RS01000	EC391_RS10660	EC390_RS12080	EGM63_RS05785	EGM64_RS03820	EGM60_RS00715	EGA31_RS01025
189	13	hypothetical protein	GCF_000007865	MAP_RS00975	0		MAP_RS00975	MAP4_RS18345	RC58_RS18310	RE97_RS18345	A0V42_RS00975	CEP84_RS02690	CEG92_RS01005	EC391_RS10655	EC390_RS12085	EGM63_RS05780	EGM64_RS03825	EGM60_RS00720	EGA31_RS01030
191	13	membrane protein	GCF_000007865	MAP_RS00985	0	FN	MAP_RS00985	MAP4_RS18335	RC58_RS18305	RE97_RS18335	A0V42_RS00985	CEP84_RS02680	CEG92_RS01015	EC391_RS10645	EC390_RS12095	EGM63_RS05770	EGM64_RS03835	EGM60_RS00730	EGA31_RS01040
192	13	serine--tRNA ligase	GCF_000007865	MAP_RS00990	0		MAP_RS00990	MAP4_RS18330	RC58_RS18300	RE97_RS18330	A0V42_RS00990	CEP84_RS02675	CEG92_RS01020	EC391_RS10640	EC390_RS12100	EGM63_RS05765	EGM64_RS03840	EGM60_RS00735	EGA31_RS01045
193	13	AraC family transcriptional regulator	GCF_000007865	MAP_RS00995	0		MAP_RS00995	MAP4_RS18325	RC58_RS18295	RE97_RS18325	A0V42_RS00995	CEP84_RS02670	CEG92_RS01025	EC391_RS10635	EC390_RS12105	EGM63_RS05760	EGM64_RS03845	EGM60_RS00740	EGA31_RS01050
194	13	SAM-dependent methyltransferase	GCF_000007865	MAP_RS01000	0		MAP_RS01000	MAP4_RS18320	RC58_RS18290	RE97_RS18320	A0V42_RS01000	CEP84_RS02665	CEG92_RS01030	EC391_RS10630	EC390_RS12110	EGM63_RS05755	EGM64_RS03850	EGM60_RS00745	EGA31_RS01055
195	13	DUF2834 domain-containing protein	GCF_000007865	MAP_RS01005	0		MAP_RS01005	MAP4_RS18315	RC58_RS18285	RE97_RS18315	A0V42_RS01005	CEP84_RS02660	CEG92_RS01035	EC391_RS10625	EC390_RS12115	EGM63_RS05750	EGM64_RS03855	EGM60_RS00750	EGA31_RS01060
196	13	TetR family transcriptional regulator	GCF_000007865	MAP_RS01010	0		MAP_RS01010	MAP4_RS18310	RC58_RS18280	RE97_RS18310	A0V42_RS01010	CEP84_RS02655	CEG92_RS01040	EC391_RS10620	EC390_RS12120	EGM63_RS05745	EGM64_RS03860	EGM60_RS00755	EGA31_RS01065
197	13	NAD(P)/FAD-dependent oxidoreductase	GCF_000007865	MAP_RS01015	0		MAP_RS01015	MAP4_RS18305	RC58_RS18275	RE97_RS18305	A0V42_RS01015	CEP84_RS02650	CEG92_RS01045	EC391_RS10615	EC390_RS12125	EGM63_RS05740	EGM64_RS03865	EGM60_RS00760	EGA31_RS01070
198	13	hypothetical protein	GCF_000007865	MAP_RS01020	0		MAP_RS01020	MAP4_RS18300	RC58_RS18270	RE97_RS18300	A0V42_RS01020	CEP84_RS02645	CEG92_RS01050	EC391_RS10610	EC390_RS12130	EGM63_RS05735	EGM64_RS03870	EGM60_RS00765	EGA31_RS01075
199	13	MBL fold metallo-hydrolase	GCF_000007865	MAP_RS01025	0		MAP_RS01025	MAP4_RS18295	RC58_RS18265	RE97_RS18295	A0V42_RS01025	CEP84_RS02640	CEG92_RS01055	EC391_RS10605	EC390_RS12135	EGM63_RS05730	EGM64_RS03875	EGM60_RS00770	EGA31_RS01080
200	13	1-acyl-sn-glycerol-3-phosphate acyltransferase	GCF_000007865	MAP_RS01030	0		MAP_RS01030	MAP4_RS18290	RC58_RS18260	RE97_RS18290	A0V42_RS01030	CEP84_RS02635	CEG92_RS01060	EC391_RS10600	EC390_RS12140	EGM63_RS05725	EGM64_RS03880	EGM60_RS00775	EGA31_RS01085
201	13	1-acyl-sn-glycerol-3-phosphate acyltransferase	GCF_000007865	MAP_RS01035	0		MAP_RS01035	MAP4_RS18285	RC58_RS18255	RE97_RS18285	A0V42_RS01035	CEP84_RS02630	CEG92_RS01065	EC391_RS10595	EC390_RS12145	EGM63_RS05720	EGM64_RS03885	EGM60_RS00780	EGA31_RS01090
203	13	Cof-type HAD-IIB family hydrolase	GCF_000007865	MAP_RS01045	0		MAP_RS01045	MAP4_RS18275	RC58_RS18245	RE97_RS18275	A0V42_RS01045	CEP84_RS02620	CEG92_RS01075	EC391_RS10585	EC390_RS12155	EGM63_RS05710	EGM64_RS03895	EGM60_RS00790	EGA31_RS01100
204	13	cold-shock protein	GCF_000007865	MAP_RS01050	0		MAP_RS01050	MAP4_RS18270	RC58_RS18240	RE97_RS18270	A0V42_RS01050	CEP84_RS02615	CEG92_RS01080	EC391_RS10580	EC390_RS12160	EGM63_RS05705	EGM64_RS03900	EGM60_RS00795	EGA31_RS01105
206	13	UDP-galactopyranose mutase	GCF_000007865	MAP_RS01060	0		MAP_RS01060	MAP4_RS18260	RC58_RS18230	RE97_RS18260	A0V42_RS01060	CEP84_RS02600	CEG92_RS01095	EC391_RS10565	EC390_RS12170	EGM63_RS05695	EGM64_RS03910	EGM60_RS00805	EGA31_RS01115
207	13	glycosyltransferase family 2 protein	GCF_000007865	MAP_RS01065	0		MAP_RS01065	MAP4_RS18255	RC58_RS18225	RE97_RS18255	A0V42_RS01065	CEP84_RS02595	CEG92_RS01100	EC391_RS10560	EC390_RS12175	EGM63_RS05690	EGM64_RS03915	EGM60_RS00810	EGA31_RS01120
208	13	PAP2 family protein	GCF_000007865	MAP_RS01070	0		MAP_RS01070	MAP4_RS18250	RC58_RS18220	RE97_RS18250	A0V42_RS01070	CEP84_RS02590	CEG92_RS01105	EC391_RS10555	EC390_RS12180	EGM63_RS05685	EGM64_RS03920	EGM60_RS00815	EGA31_RS01125
209	13	decaprenyl-phosphate phosphoribosyltransferase	GCF_000007865	MAP_RS01075	0		MAP_RS01075	MAP4_RS18245	RC58_RS18215	RE97_RS18245	A0V42_RS01075	CEP84_RS02585	CEG92_RS01110	EC391_RS10550	EC390_RS12185	EGM63_RS05680	EGM64_RS03925	EGM60_RS00820	EGA31_RS01130
210	13	hypothetical protein	GCF_000007865	MAP_RS01080	0		MAP_RS01080	MAP4_RS18240	RC58_RS18210	RE97_RS18240	A0V42_RS01080	CEP84_RS02580	CEG92_RS01115	EC391_RS10545	EC390_RS12190	EGM63_RS05675	EGM64_RS03930	EGM60_RS00825	EGA31_RS01135
211	13	esterase family protein	GCF_000007865	MAP_RS01085	0		MAP_RS01085	MAP4_RS18235	RC58_RS18205	RE97_RS18235	A0V42_RS01085	CEP84_RS02575	CEG92_RS01120	EC391_RS10540	EC390_RS12195	EGM63_RS05670	EGM64_RS03935	EGM60_RS00830	EGA31_RS01140
212	13	esterase family protein	GCF_000007865	MAP_RS01090	0		MAP_RS01090	MAP4_RS18230	RC58_RS18200	RE97_RS18230	A0V42_RS01090	CEP84_RS02570	CEG92_RS01125	EC391_RS10535	EC390_RS12200	EGM63_RS05665	EGM64_RS03940	EGM60_RS00835	EGA31_RS01145
213	13	cutinase family protein	GCF_000007865	MAP_RS01095	0		MAP_RS01095	MAP4_RS18225	RC58_RS18195	RE97_RS18225	A0V42_RS01095	CEP84_RS02565	CEG92_RS01130	EC391_RS10530	EC390_RS12205	EGM63_RS05660	EGM64_RS03945	EGM60_RS00840	EGA31_RS01150
214	13	nitrate ABC transporter substrate-binding protein	GCF_000007865	MAP_RS01100	0		MAP_RS01100	MAP4_RS18220	RC58_RS18190	RE97_RS18220	A0V42_RS01100	CEP84_RS02560	CEG92_RS01135	EC391_RS10525	EC390_RS12210	EGM63_RS05655	EGM64_RS03950	EGM60_RS00845	EGA31_RS01155
215	13	polyketide synthase	GCF_000007865	MAP_RS01105	0		MAP_RS01105	MAP4_RS18215	RC58_RS18185	RE97_RS18215	A0V42_RS01105	CEP84_RS02555	CEG92_RS01140	EC391_RS10520	EC390_RS12215	EGM63_RS05650	EGM64_RS03955	EGM60_RS00850	EGA31_RS01160
216	13	acyl-CoA carboxylase subunit beta	GCF_000007865	MAP_RS01110	0		MAP_RS01110	MAP4_RS18210	RC58_RS18180	RE97_RS18210	A0V42_RS01110	CEP84_RS02550	CEG92_RS01145	EC391_RS10515	EC390_RS12220	EGM63_RS05645	EGM64_RS03960	EGM60_RS00855	EGA31_RS01165
217	13	SAM-dependent methyltransferase	GCF_000007865	MAP_RS01115	0		MAP_RS01115	MAP4_RS18205	RC58_RS18175	RE97_RS18205	A0V42_RS01115	CEP84_RS02545	CEG92_RS01150	EC391_RS10510	EC390_RS12225	EGM63_RS05640	EGM64_RS03965	EGM60_RS00860	EGA31_RS01170
218	13	AraC family transcriptional regulator	GCF_000007865	MAP_RS01120	0		MAP_RS01120	MAP4_RS18200	RC58_RS18170	RE97_RS18200	A0V42_RS01120	CEP84_RS02540	CEG92_RS01155	EC391_RS10505	EC390_RS12230	EGM63_RS05635	EGM64_RS03970	EGM60_RS00865	EGA31_RS01175
219	13	acyl-CoA dehydrogenase	GCF_000007865	MAP_RS01125	0		MAP_RS01125	MAP4_RS18195	RC58_RS18165	RE97_RS18195	A0V42_RS01125	CEP84_RS02535	CEG92_RS01160	EC391_RS10500	EC390_RS12235	EGM63_RS05630	EGM64_RS03975	EGM60_RS00870	EGA31_RS01180
220	13	Lrp/AsnC family transcriptional regulator	GCF_000007865	MAP_RS01130	0		MAP_RS01130	MAP4_RS18190	RC58_RS18160	RE97_RS18190	A0V42_RS01130	CEP84_RS02530	CEG92_RS01165	EC391_RS10495	EC390_RS12240	EGM63_RS05625	EGM64_RS03980	EGM60_RS00875	EGA31_RS01185
221	13	LLM class flavin-dependent oxidoreductase	GCF_000007865	MAP_RS01135	0		MAP_RS01135	MAP4_RS18185	RC58_RS18155	RE97_RS18185	A0V42_RS01135	CEP84_RS02525	CEG92_RS01170	EC391_RS10490	EC390_RS12245	EGM63_RS05620	EGM64_RS03985	EGM60_RS00880	EGA31_RS01190
222	13	hypothetical protein	GCF_000007865	MAP_RS01140	0		MAP_RS01140	MAP4_RS18180	RC58_RS18150	RE97_RS18180	A0V42_RS01140	CEP84_RS02520	CEG92_RS01175	EC391_RS10485	EC390_RS12250	EGM63_RS05615	EGM64_RS03990	EGM60_RS00885	EGA31_RS01195
223	13	arabinosyltransferase	GCF_000007865	MAP_RS01145	0		MAP_RS01145	MAP4_RS18175	RC58_RS18145	RE97_RS18175	A0V42_RS01145	CEP84_RS02515	CEG92_RS01180	EC391_RS10480	EC390_RS12255	EGM63_RS05610	EGM64_RS03995	EGM60_RS00890	EGA31_RS01200
224	13	arabinosyltransferase	GCF_000007865	MAP_RS01150	0		MAP_RS01150	MAP4_RS18170	RC58_RS18140	RE97_RS18170	A0V42_RS01150	CEP84_RS02510	CEG92_RS01185	EC391_RS10475	EC390_RS12260	EGM63_RS05605	EGM64_RS04000	EGM60_RS00895	EGA31_RS01205
225	13	transcriptional regulator	GCF_000007865	MAP_RS01155	0		MAP_RS01155	MAP4_RS18165	RC58_RS18135	RE97_RS18165	A0V42_RS01155	CEP84_RS02505	CEG92_RS01190	EC391_RS10470	EC390_RS12265	EGM63_RS05600	EGM64_RS04005	EGM60_RS00900	EGA31_RS01210
226	13	maleylpyruvate isomerase family mycothiol-dependent enzyme	GCF_000007865	MAP_RS01160	0		MAP_RS01160	MAP4_RS18160	RC58_RS18130	RE97_RS18160	A0V42_RS01160	CEP84_RS02500	CEG92_RS01195	EC391_RS10465	EC390_RS12270	EGM63_RS05595	EGM64_RS04010	EGM60_RS00905	EGA31_RS01215
227	13	hypothetical protein	GCF_000007865	MAP_RS01165	0		MAP_RS01165	MAP4_RS18155	RC58_RS18125	RE97_RS18155	A0V42_RS01165	CEP84_RS02495	CEG92_RS01200	EC391_RS10460	EC390_RS12275	EGM63_RS05590	EGM64_RS04015	EGM60_RS00910	EGA31_RS01220
228	13	arabinosyltransferase	GCF_000007865	MAP_RS01170	0		MAP_RS01170	MAP4_RS18150	RC58_RS18120	RE97_RS18150	A0V42_RS01170	CEP84_RS02490	CEG92_RS01205	EC391_RS10455	EC390_RS12280	EGM63_RS05585	EGM64_RS04020	EGM60_RS00915	EGA31_RS01225
229	13	arabinofuranosyltransferase	GCF_000007865	MAP_RS01175	0		MAP_RS01175	MAP4_RS18145	RC58_RS18115	RE97_RS18145	A0V42_RS01175	CEP84_RS02485	CEG92_RS01210	EC391_RS10450	EC390_RS12285	EGM63_RS05580	EGM64_RS04025	EGM60_RS00920	EGA31_RS01230
230	13	decaprenylphospho-beta-D-erythro-pentofuranosid- 2-ulose 2-reductase	GCF_000007865	MAP_RS01180	0		MAP_RS01180	MAP4_RS18140	RC58_RS18110	RE97_RS18140	A0V42_RS01180	CEP84_RS02480	CEG92_RS01215	EC391_RS10445	EC390_RS12290	EGM63_RS05575	EGM64_RS04030	EGM60_RS00925	EGA31_RS01235
231	13	FAD-binding oxidoreductase	GCF_000007865	MAP_RS01185	0		MAP_RS01185	MAP4_RS18135	RC58_RS18105	RE97_RS18135	A0V42_RS01185	CEP84_RS02475	CEG92_RS01220	EC391_RS10440	EC390_RS12295	EGM63_RS05570	EGM64_RS04035	EGM60_RS00930	EGA31_RS01240
232	13	GtrA family protein	GCF_000007865	MAP_RS01190	0		MAP_RS01190	MAP4_RS18130	RC58_RS18100	RE97_RS18130	A0V42_RS01190	CEP84_RS02470	CEG92_RS01225	EC391_RS10435	EC390_RS12300	EGM63_RS05565	EGM64_RS04040	EGM60_RS00935	EGA31_RS01245
233	13	nucleoside diphosphate kinase regulator	GCF_000007865	MAP_RS01195	0		MAP_RS01195	MAP4_RS18125	RC58_RS18095	RE97_RS18125	A0V42_RS01195	CEP84_RS02465	CEG92_RS01230	EC391_RS10430	EC390_RS12305	EGM63_RS05560	EGM64_RS04045	EGM60_RS00940	EGA31_RS01250
234	13	TauD/TfdA family dioxygenase	GCF_000007865	MAP_RS01200	0		MAP_RS01200	MAP4_RS18120	RC58_RS18090	RE97_RS18120	A0V42_RS01200	CEP84_RS02460	CEG92_RS01235	EC391_RS10425	EC390_RS12310	EGM63_RS05555	EGM64_RS04050	EGM60_RS00945	EGA31_RS01255
235	13	ABC transporter permease	GCF_000007865	MAP_RS01205	0		MAP_RS01205	MAP4_RS18115	RC58_RS18085	RE97_RS18115	A0V42_RS01205	CEP84_RS02455	CEG92_RS01240	EC391_RS10420	EC390_RS12315	EGM63_RS05550	EGM64_RS04055	EGM60_RS00950	EGA31_RS01260
236	13	glycosyltransferase family 2 protein	GCF_000007865	MAP_RS01210	0		MAP_RS01210	MAP4_RS18110	RC58_RS18080	RE97_RS18110	A0V42_RS01210	CEP84_RS02450	CEG92_RS01245	EC391_RS10415	EC390_RS12320	EGM63_RS05545	EGM64_RS04060	EGM60_RS00955	EGA31_RS01265
237	13	ABC transporter ATP-binding protein	GCF_000007865	MAP_RS01215	0		MAP_RS01215	MAP4_RS18105	RC58_RS18075	RE97_RS18105	A0V42_RS01215	CEP84_RS02445	CEG92_RS01250	EC391_RS10410	EC390_RS12325	EGM63_RS05540	EGM64_RS04065	EGM60_RS00960	EGA31_RS01270
238	13	DUF2587 domain-containing protein	GCF_000007865	MAP_RS01220	0		MAP_RS01220	MAP4_RS18100	RC58_RS18070	RE97_RS18100	A0V42_RS01220	CEP84_RS02440	CEG92_RS01255	EC391_RS10405	EC390_RS12330	EGM63_RS05535	EGM64_RS04070	EGM60_RS00965	EGA31_RS01275
239	13	hypothetical protein	GCF_000007865	MAP_RS01225	0		MAP_RS01225	MAP4_RS18095	RC58_RS18065	RE97_RS18095	A0V42_RS01225	CEP84_RS02435	CEG92_RS01260	EC391_RS10400	EC390_RS12335	EGM63_RS05530	EGM64_RS04075	EGM60_RS00970	EGA31_RS01280
240	13	cysteine desulfurase-like protein	GCF_000007865	MAP_RS01230	0		MAP_RS01230	MAP4_RS18090	RC58_RS18060	RE97_RS18090	A0V42_RS01230	CEP84_RS02430	CEG92_RS01265	EC391_RS10395	EC390_RS12340	EGM63_RS05525	EGM64_RS04080	EGM60_RS00975	EGA31_RS01285
241	13	NAD(P)H quinone oxidoreductase	GCF_000007865	MAP_RS01235	0		MAP_RS01235	MAP4_RS18085	RC58_RS18055	RE97_RS18085	A0V42_RS01235	CEP84_RS02425	CEG92_RS01270	EC391_RS10390	EC390_RS12345	EGM63_RS05520	EGM64_RS04085	EGM60_RS00980	EGA31_RS01290
242	13	hypothetical protein	GCF_000007865	MAP_RS01245	0		MAP_RS01245	MAP4_RS18075	RC58_RS18045	RE97_RS18075	A0V42_RS01245	CEP84_RS02415	CEG92_RS01280	EC391_RS10380	EC390_RS12355	EGM63_RS05510	EGM64_RS04095	EGM60_RS00990	EGA31_RS01300
243	13	hypothetical protein	GCF_000007865	MAP_RS01250	0		MAP_RS01250	MAP4_RS18070	RC58_RS18040	RE97_RS18070	A0V42_RS01250	CEP84_RS02410	CEG92_RS01285	EC391_RS10375	EC390_RS12360	EGM63_RS05505	EGM64_RS04100	EGM60_RS00995	EGA31_RS01305
244	13	hydrolase	GCF_000007865	MAP_RS01255	0		MAP_RS01255	MAP4_RS18065	RC58_RS18035	RE97_RS18065	A0V42_RS01255	CEP84_RS02405	CEG92_RS01290	EC391_RS10370	EC390_RS12365	EGM63_RS05500	EGM64_RS04105	EGM60_RS01000	EGA31_RS01310
245	13	enoyl-CoA hydratase	GCF_000007865	MAP_RS01260	0		MAP_RS01260	MAP4_RS18060	RC58_RS18030	RE97_RS18060	A0V42_RS01260	CEP84_RS02400	CEG92_RS01295	EC391_RS10365	EC390_RS12370	EGM63_RS05495	EGM64_RS04110	EGM60_RS01005	EGA31_RS01315
246	13	TIGR03086 family protein	GCF_000007865	MAP_RS01265	0		MAP_RS01265	MAP4_RS18055	RC58_RS18025	RE97_RS18055	A0V42_RS01265	CEP84_RS02395	CEG92_RS01300	EC391_RS10360	EC390_RS12375	EGM63_RS05490	EGM64_RS04115	EGM60_RS01010	EGA31_RS01320
247	13	DUF4334 domain-containing protein	GCF_000007865	MAP_RS01270	0		MAP_RS01270	MAP4_RS18050	RC58_RS18020	RE97_RS18050	A0V42_RS01270	CEP84_RS02390	CEG92_RS01305	EC391_RS10355	EC390_RS12380	EGM63_RS05485	EGM64_RS04120	EGM60_RS01015	EGA31_RS01325
248	13	aminotransferase	GCF_000007865	MAP_RS01275	0		MAP_RS01275	MAP4_RS18045	RC58_RS18015	RE97_RS18045	A0V42_RS01275	CEP84_RS02385	CEG92_RS01310	EC391_RS10350	EC390_RS12385	EGM63_RS05480	EGM64_RS04125	EGM60_RS01020	EGA31_RS01330
250	13	phosphotransferase family protein	GCF_000007865	MAP_RS01300	0		MAP_RS01300	MAP4_RS18020	RC58_RS17990	RE97_RS18020	A0V42_RS01300	CEP84_RS02360	CEG92_RS01335	EC391_RS10325	EC390_RS12410	EGM63_RS05455	EGM64_RS04150	EGM60_RS01045	EGA31_RS01355
251	13	SAM-dependent methyltransferase	GCF_000007865	MAP_RS01305	0		MAP_RS01305	MAP4_RS18015	RC58_RS17985	RE97_RS18015	A0V42_RS01305	CEP84_RS02355	CEG92_RS01340	EC391_RS10320	EC390_RS12415	EGM63_RS05450	EGM64_RS04155	EGM60_RS01050	EGA31_RS01360
252	13	hypothetical protein	GCF_000007865	MAP_RS01310	0		MAP_RS01310	MAP4_RS18010	RC58_RS17980	RE97_RS18010	A0V42_RS01310	CEP84_RS02350	CEG92_RS01345	EC391_RS10315	EC390_RS12420	EGM63_RS05445	EGM64_RS04160	EGM60_RS01055	EGA31_RS01365
254	13	DNA-binding response regulator	GCF_000007865	MAP_RS01315	0		MAP_RS01315	MAP4_RS18005	RC58_RS17975	RE97_RS18005	A0V42_RS01315	CEP84_RS02340	CEG92_RS01355	EC391_RS10305	EC390_RS12430	EGM63_RS05435	EGM64_RS04170	EGM60_RS01065	EGA31_RS01375
255	13	sensor histidine kinase	GCF_000007865	MAP_RS01320	0		MAP_RS01320	MAP4_RS18000	RC58_RS17970	RE97_RS18000	A0V42_RS01320	CEP84_RS02330	CEG92_RS01360	EC391_RS10295	EC390_RS12440	EGM63_RS05425	EGM64_RS04180	EGM60_RS01075	EGA31_RS01380
256	13	hypothetical protein	GCF_000007865	MAP_RS01325	0		MAP_RS01325	MAP4_RS17995	RC58_RS17965	RE97_RS17995	A0V42_RS01325	CEP84_RS02325	CEG92_RS01365	EC391_RS10290	EC390_RS12445	EGM63_RS05420	EGM64_RS04185	EGM60_RS01080	EGA31_RS01385
257	13	alkyl sulfatase	GCF_000007865	MAP_RS01330	0		MAP_RS01330	MAP4_RS17990	RC58_RS17960	RE97_RS17990	A0V42_RS01330	CEP84_RS02320	CEG92_RS01370	EC391_RS10285	EC390_RS12450	EGM63_RS05415	EGM64_RS04190	EGM60_RS01085	EGA31_RS01390
259	13	TetR/AcrR family transcriptional regulator	GCF_000007865	MAP_RS01340	0		MAP_RS01340	MAP4_RS17980	RC58_RS17950	RE97_RS17980	A0V42_RS01340	CEP84_RS02310	CEG92_RS01380	EC391_RS10275	EC390_RS12460	EGM63_RS05405	EGM64_RS04200	EGM60_RS01095	EGA31_RS01400
260	13	acyl-CoA dehydrogenase	GCF_000007865	MAP_RS01345	0		MAP_RS01345	MAP4_RS17975	RC58_RS17945	RE97_RS17975	A0V42_RS01345	CEP84_RS02305	CEG92_RS01385	EC391_RS10270	EC390_RS12465	EGM63_RS05400	EGM64_RS04205	EGM60_RS01100	EGA31_RS01405
261	13	KR domain-containing protein	GCF_000007865	MAP_RS01350	0		MAP_RS01350	MAP4_RS17970	RC58_RS17940	RE97_RS17970	A0V42_RS01350	CEP84_RS02300	CEG92_RS01390	EC391_RS10265	EC390_RS12470	EGM63_RS05395	EGM64_RS04210	EGM60_RS01105	EGA31_RS01410
262	13	phosphotransferase family protein	GCF_000007865	MAP_RS01355	0		MAP_RS01355	MAP4_RS17965	RC58_RS17935	RE97_RS17965	A0V42_RS01355	CEP84_RS02295	CEG92_RS01395	EC391_RS10260	EC390_RS12475	EGM63_RS05390	EGM64_RS04215	EGM60_RS01110	EGA31_RS01415
263	13	class I SAM-dependent methyltransferase	GCF_000007865	MAP_RS01360	0		MAP_RS01360	MAP4_RS17960	RC58_RS17930	RE97_RS17960	A0V42_RS01360	CEP84_RS02290	CEG92_RS01400	EC391_RS10255	EC390_RS12480	EGM63_RS05385	EGM64_RS04220	EGM60_RS01115	EGA31_RS01420
264	13	histidine phosphatase family protein	GCF_000007865	MAP_RS01365	0		MAP_RS01365	MAP4_RS17955	RC58_RS17925	RE97_RS17955	A0V42_RS01365	CEP84_RS02285	CEG92_RS01405	EC391_RS10250	EC390_RS12485	EGM63_RS05380	EGM64_RS04225	EGM60_RS01120	EGA31_RS01425
265	13	phosphotransferase family protein	GCF_000007865	MAP_RS01370	0		MAP_RS01370	MAP4_RS17950	RC58_RS17920	RE97_RS17950	A0V42_RS01370	CEP84_RS02280	CEG92_RS01410	EC391_RS10245	EC390_RS12490	EGM63_RS05375	EGM64_RS04230	EGM60_RS01125	EGA31_RS01430
266	13	ABC transporter	GCF_000007865	MAP_RS01380	0		MAP_RS01380	MAP4_RS17940	RC58_RS17910	RE97_RS17940	A0V42_RS01380	CEP84_RS02270	CEG92_RS01420	EC391_RS10235	EC390_RS12500	EGM63_RS05365	EGM64_RS04240	EGM60_RS01135	EGA31_RS01440
267	13	ABC transporter permease	GCF_000007865	MAP_RS01390	0		MAP_RS01390	MAP4_RS17930	RC58_RS17900	RE97_RS17930	A0V42_RS01390	CEP84_RS02260	CEG92_RS01430	EC391_RS10225	EC390_RS12510	EGM63_RS05355	EGM64_RS04250	EGM60_RS01145	EGA31_RS01450
268	13	ABC transporter permease	GCF_000007865	MAP_RS01395	0		MAP_RS01395	MAP4_RS17925	RC58_RS17895	RE97_RS17925	A0V42_RS01395	CEP84_RS02255	CEG92_RS01435	EC391_RS10220	EC390_RS12515	EGM63_RS05350	EGM64_RS04255	EGM60_RS01150	EGA31_RS01455
269	13	hypothetical protein	GCF_000007865	MAP_RS01400	0		MAP_RS01400	MAP4_RS17920	RC58_RS17890	RE97_RS17920	A0V42_RS01400	CEP84_RS02250	CEG92_RS01440	EC391_RS10215	EC390_RS12520	EGM63_RS05345	EGM64_RS04260	EGM60_RS01155	EGA31_RS01460
270	13	prephenate dehydrogenase	GCF_000007865	MAP_RS01405	0		MAP_RS01405	MAP4_RS17915	RC58_RS17885	RE97_RS17915	A0V42_RS01405	CEP84_RS02245	CEG92_RS01445	EC391_RS10210	EC390_RS12525	EGM63_RS05340	EGM64_RS04265	EGM60_RS01160	EGA31_RS01465
271	13	tRNA adenosine deaminase	GCF_000007865	MAP_RS01410	0		MAP_RS01410	MAP4_RS17910	RC58_RS17880	RE97_RS17910	A0V42_RS01410	CEP84_RS02240	CEG92_RS01450	EC391_RS10205	EC390_RS12530	EGM63_RS05335	EGM64_RS04270	EGM60_RS01165	EGA31_RS01470
273	13	endo-1,4-beta-glucanase	GCF_000007865	MAP_RS01425	0		MAP_RS01425	MAP4_RS17895	RC58_RS17865	RE97_RS17895	A0V42_RS01425	CEP84_RS02225	CEG92_RS01465	EC391_RS10190	EC390_RS12545	EGM63_RS05320	EGM64_RS04285	EGM60_RS01180	EGA31_RS01485
274	13	CAP domain-containing protein	GCF_000007865	MAP_RS01430	0		MAP_RS01430	MAP4_RS17890	RC58_RS17860	RE97_RS17890	A0V42_RS01430	CEP84_RS02220	CEG92_RS01470	EC391_RS10185	EC390_RS12550	EGM63_RS05315	EGM64_RS04290	EGM60_RS01185	EGA31_RS01490
275	13	hypothetical protein	GCF_000007865	MAP_RS22420	0		MAP_RS22420	MAP4_RS22950	RC58_RS23000	RE97_RS23050	A0V42_RS22390	CEP84_RS02215	CEG92_RS01475	EC391_RS10180	EC390_RS12555	EGM63_RS05310	EGM64_RS04295	EGM60_RS01190	EGA31_RS01495
276	13	hypothetical protein	GCF_000007865	MAP_RS22425	0		MAP_RS22425	MAP4_RS22945	RC58_RS22995	RE97_RS23045	A0V42_RS22395	CEP84_RS02210	CEG92_RS01480	EC391_RS10175	EC390_RS12560	EGM63_RS05305	EGM64_RS04300	EGM60_RS01195	EGA31_RS01500
277	13	DUF4185 domain-containing protein	GCF_000007865	MAP_RS01435	0		MAP_RS01435	MAP4_RS17885	RC58_RS17855	RE97_RS17885	A0V42_RS01435	CEP84_RS02205	CEG92_RS01485	EC391_RS10170	EC390_RS12565	EGM63_RS05295	EGM64_RS04310	EGM60_RS01205	EGA31_RS01510
278	13	hypothetical protein	GCF_000007865	MAP_RS01440	0		MAP_RS01440	MAP4_RS17880	RC58_RS17850	RE97_RS17880	A0V42_RS01440	CEP84_RS02200	CEG92_RS01490	EC391_RS10165	EC390_RS12570	EGM63_RS05290	EGM64_RS04315	EGM60_RS01210	EGA31_RS01515
279	13	hypothetical protein	GCF_000007865	MAP_RS01445	0		MAP_RS01445	MAP4_RS22940	RC58_RS22990	RE97_RS17875	A0V42_RS01445	CEP84_RS02195	CEG92_RS01495	EC391_RS10160	EC390_RS12575	EGM63_RS05285	EGM64_RS04320	EGM60_RS01215	EGA31_RS01520
280	13	DUF2237 domain-containing protein	GCF_000007865	MAP_RS01450	0		MAP_RS01450	MAP4_RS17875	RC58_RS17845	RE97_RS17870	A0V42_RS01450	CEP84_RS02190	CEG92_RS01500	EC391_RS10155	EC390_RS12580	EGM63_RS05280	EGM64_RS04325	EGM60_RS01220	EGA31_RS01525
281	13	MBL fold metallo-hydrolase	GCF_000007865	MAP_RS01460	0		MAP_RS01460	MAP4_RS17865	RC58_RS17835	RE97_RS17860	A0V42_RS01460	CEP84_RS02180	CEG92_RS01510	EC391_RS10145	EC390_RS12590	EGM63_RS05270	EGM64_RS04335	EGM60_RS01230	EGA31_RS01535
282	13	VOC family protein	GCF_000007865	MAP_RS01465	0		MAP_RS01465	MAP4_RS17860	RC58_RS17830	RE97_RS17855	A0V42_RS01465	CEP84_RS02175	CEG92_RS01515	EC391_RS10140	EC390_RS12595	EGM63_RS05265	EGM64_RS04340	EGM60_RS01235	EGA31_RS01540
284	13	CoA transferase	GCF_000007865	MAP_RS01475	0		MAP_RS01475	MAP4_RS17850	RC58_RS17820	RE97_RS17845	A0V42_RS01475	CEP84_RS02165	CEG92_RS01525	EC391_RS10130	EC390_RS12605	EGM63_RS05255	EGM64_RS04350	EGM60_RS01245	EGA31_RS01560
285	13	CoA ester lyase	GCF_000007865	MAP_RS01480	0		MAP_RS01480	MAP4_RS17845	RC58_RS17815	RE97_RS17840	A0V42_RS01480	CEP84_RS02160	CEG92_RS01530	EC391_RS10125	EC390_RS12610	EGM63_RS05250	EGM64_RS04355	EGM60_RS01250	EGA31_RS01565
286	13	pyruvate carboxylase	GCF_000007865	MAP_RS01485	0		MAP_RS01485	MAP4_RS17840	RC58_RS17810	RE97_RS17835	A0V42_RS01485	CEP84_RS02155	CEG92_RS01535	EC391_RS10120	EC390_RS12615	EGM63_RS05245	EGM64_RS04360	EGM60_RS01255	EGA31_RS01570
287	13	2-methylcitrate synthase	GCF_000007865	MAP_RS01490	0		MAP_RS01490	MAP4_RS17835	RC58_RS17805	RE97_RS17830	A0V42_RS01490	CEP84_RS02150	CEG92_RS01540	EC391_RS10115	EC390_RS12620	EGM63_RS05240	EGM64_RS04365	EGM60_RS01260	EGA31_RS01575
288	13	methylisocitrate lyase	GCF_000007865	MAP_RS01495	0		MAP_RS01495	MAP4_RS17830	RC58_RS17800	RE97_RS17825	A0V42_RS01495	CEP84_RS02145	CEG92_RS01545	EC391_RS10110	EC390_RS12625	EGM63_RS05235	EGM64_RS04370	EGM60_RS01265	EGA31_RS01580
289	13	2-methylcitrate dehydratase	GCF_000007865	MAP_RS01500	0		MAP_RS01500	MAP4_RS17825	RC58_RS17795	RE97_RS17820	A0V42_RS01500	CEP84_RS02140	CEG92_RS01550	EC391_RS10105	EC390_RS12630	EGM63_RS05230	EGM64_RS04375	EGM60_RS01270	EGA31_RS01585
290	13	XRE family transcriptional regulator	GCF_000007865	MAP_RS01505	0		MAP_RS01505	MAP4_RS17820	RC58_RS17790	RE97_RS17815	A0V42_RS01505	CEP84_RS02135	CEG92_RS01555	EC391_RS10100	EC390_RS12635	EGM63_RS05225	EGM64_RS04380	EGM60_RS01275	EGA31_RS01590
292	13	hypothetical protein	GCF_000007865	MAP_RS01515	0		MAP_RS01515	MAP4_RS17805	RC58_RS17775	RE97_RS17800	A0V42_RS01515	CEP84_RS02120	CEG92_RS01570	EC391_RS10085	EC390_RS12650	EGM63_RS05210	EGM64_RS04395	EGM60_RS01290	EGA31_RS18665
293	13	class I SAM-dependent methyltransferase	GCF_000390085	MAP4_RS17800	0		MAP_RS01520	MAP4_RS17800	RC58_RS17770	RE97_RS17795	A0V42_RS01520	CEP84_RS02115	CEG92_RS01575	EC391_RS10080	EC390_RS12655	EGM63_RS05205	EGM64_RS04400	EGM60_RS01295	EGA31_RS18670
294	13	ergothioneine biosynthesis PLP-dependent enzyme EgtE	GCF_000007865	MAP_RS01525	0		MAP_RS01525	MAP4_RS17795	RC58_RS17765	RE97_RS17790	A0V42_RS01525	CEP84_RS02110	CEG92_RS01580	EC391_RS10075	EC390_RS12660	EGM63_RS05200	EGM64_RS04405	EGM60_RS01300	EGA31_RS18675
295	13	L-histidine N(alpha)-methyltransferase	GCF_000007865	MAP_RS01530	0		MAP_RS01530	MAP4_RS17790	RC58_RS17760	RE97_RS17785	A0V42_RS01530	CEP84_RS02105	CEG92_RS01585	EC391_RS10070	EC390_RS12665	EGM63_RS05195	EGM64_RS04410	EGM60_RS01305	EGA31_RS18680
296	13	ergothioneine biosynthesis protein EgtC	GCF_000007865	MAP_RS01535	0		MAP_RS01535	MAP4_RS17785	RC58_RS17755	RE97_RS17780	A0V42_RS01535	CEP84_RS02100	CEG92_RS01590	EC391_RS10065	EC390_RS12670	EGM63_RS05190	EGM64_RS04415	EGM60_RS01310	EGA31_RS18685
297	13	ergothioneine biosynthesis protein EgtB	GCF_000007865	MAP_RS01540	0		MAP_RS01540	MAP4_RS17780	RC58_RS17750	RE97_RS17775	A0V42_RS01540	CEP84_RS02095	CEG92_RS01595	EC391_RS10060	EC390_RS12675	EGM63_RS05185	EGM64_RS04420	EGM60_RS01315	EGA31_RS18690
298	13	ergothioneine biosynthesis glutamate--cysteine ligase EgtA	GCF_000007865	MAP_RS01545	0		MAP_RS01545	MAP4_RS17775	RC58_RS17745	RE97_RS17770	A0V42_RS01545	CEP84_RS02090	CEG92_RS01600	EC391_RS10055	EC390_RS12680	EGM63_RS05180	EGM64_RS04425	EGM60_RS01320	EGA31_RS18695
299	13	sensor domain-containing protein	GCF_000007865	MAP_RS01550	0		MAP_RS01550	MAP4_RS17770	RC58_RS17740	RE97_RS17765	A0V42_RS01550	CEP84_RS02085	CEG92_RS01605	EC391_RS10050	EC390_RS12685	EGM63_RS05175	EGM64_RS04430	EGM60_RS01325	EGA31_RS18700
300	13	hypothetical protein	GCF_000007865	MAP_RS01555	0		MAP_RS01555	MAP4_RS17765	RC58_RS17735	RE97_RS17760	A0V42_RS01555	CEP84_RS02080	CEG92_RS01610	EC391_RS10045	EC390_RS12690	EGM63_RS05170	EGM64_RS04435	EGM60_RS01330	EGA31_RS18705
302	13	DUF4185 domain-containing protein	GCF_000007865	MAP_RS01565	0		MAP_RS01565	MAP4_RS17755	RC58_RS17725	RE97_RS17750	A0V42_RS01565	CEP84_RS02070	CEG92_RS01620	EC391_RS10035	EC390_RS12700	EGM63_RS05160	EGM64_RS04445	EGM60_RS01340	EGA31_RS18715
303	13	aspartate-semialdehyde dehydrogenase	GCF_000007865	MAP_RS01570	0		MAP_RS01570	MAP4_RS17750	RC58_RS17720	RE97_RS17745	A0V42_RS01570	CEP84_RS02065	CEG92_RS01625	EC391_RS10030	EC390_RS12705	EGM63_RS05155	EGM64_RS04450	EGM60_RS01345	EGA31_RS18720
304	13	aspartate kinase	GCF_000007865	MAP_RS01575	0		MAP_RS01575	MAP4_RS17745	RC58_RS17715	RE97_RS17740	A0V42_RS01575	CEP84_RS02060	CEG92_RS01630	EC391_RS10025	EC390_RS12710	EGM63_RS05150	EGM64_RS04455	EGM60_RS01350	EGA31_RS18725
305	13	2-isopropylmalate synthase	GCF_000007865	MAP_RS01580	0		MAP_RS01580	MAP4_RS17740	RC58_RS17710	RE97_RS17735	A0V42_RS01580	CEP84_RS02055	CEG92_RS01635	EC391_RS10020	EC390_RS12715	EGM63_RS05145	EGM64_RS04460	EGM60_RS01355	EGA31_RS18730
306	13	DNA polymerase III subunit epsilon	GCF_000007865	MAP_RS01585	0		MAP_RS01585	MAP4_RS17735	RC58_RS17705	RE97_RS17730	A0V42_RS01585	CEP84_RS02050	CEG92_RS01640	EC391_RS10015	EC390_RS12720	EGM63_RS05140	EGM64_RS04465	EGM60_RS01360	EGA31_RS18735
307	13	DUF1727 domain-containing protein	GCF_000007865	MAP_RS01590	0		MAP_RS01590	MAP4_RS17730	RC58_RS17700	RE97_RS17725	A0V42_RS01590	CEP84_RS02035	CEG92_RS01655	EC391_RS10000	EC390_RS12735	EGM63_RS05125	EGM64_RS04480	EGM60_RS01375	EGA31_RS18740
308	13	glutamine amidotransferase	GCF_000007865	MAP_RS01595	0		MAP_RS01595	MAP4_RS17725	RC58_RS17695	RE97_RS17720	A0V42_RS01595	CEP84_RS02030	CEG92_RS01660	EC391_RS09995	EC390_RS12740	EGM63_RS05120	EGM64_RS04485	EGM60_RS01380	EGA31_RS18745
309	13	recombination protein RecR	GCF_000007865	MAP_RS01600	0		MAP_RS01600	MAP4_RS17720	RC58_RS17690	RE97_RS17715	A0V42_RS01600	CEP84_RS02025	CEG92_RS01665	EC391_RS09990	EC390_RS12745	EGM63_RS05115	EGM64_RS04490	EGM60_RS01385	EGA31_RS18750
310	13	YbaB/EbfC family nucleoid-associated protein	GCF_000007865	MAP_RS01605	0		MAP_RS01605	MAP4_RS17715	RC58_RS17685	RE97_RS17710	A0V42_RS01605	CEP84_RS02020	CEG92_RS01670	EC391_RS09985	EC390_RS12750	EGM63_RS05110	EGM64_RS04495	EGM60_RS01390	EGA31_RS18755
311	13	N-acetylmuramoyl-L-alanine amidase	GCF_000007865	MAP_RS01610	0		MAP_RS01610	MAP4_RS17710	RC58_RS17680	RE97_RS17705	A0V42_RS01610	CEP84_RS02015	CEG92_RS01675	EC391_RS09980	EC390_RS12755	EGM63_RS05105	EGM64_RS04500	EGM60_RS01395	EGA31_RS18760
312	13	SRPBCC family protein	GCF_000007865	MAP_RS01615	0		MAP_RS01615	MAP4_RS17705	RC58_RS17675	RE97_RS17700	A0V42_RS01615	CEP84_RS02010	CEG92_RS01680	EC391_RS09975	EC390_RS12760	EGM63_RS05100	EGM64_RS04505	EGM60_RS01400	EGA31_RS18765
314	13	SAM-dependent methyltransferase	GCF_000007865	MAP_RS01625	0		MAP_RS01625	MAP4_RS17695	RC58_RS17665	RE97_RS17690	A0V42_RS01625	CEP84_RS02000	CEG92_RS01690	EC391_RS09965	EC390_RS12770	EGM63_RS05090	EGM64_RS04515	EGM60_RS01410	EGA31_RS18775
315	13	DNA polymerase III subunit gamma and tau	GCF_000007865	MAP_RS01630	0		MAP_RS01630	MAP4_RS17690	RC58_RS17660	RE97_RS17685	A0V42_RS01630	CEP84_RS01995	CEG92_RS01695	EC391_RS09960	EC390_RS12775	EGM63_RS05085	EGM64_RS04520	EGM60_RS01415	EGA31_RS18780
316	13	aminotransferase	GCF_000007865	MAP_RS01635	0		MAP_RS01635	MAP4_RS17685	RC58_RS17655	RE97_RS17680	A0V42_RS01635	CEP84_RS01990	CEG92_RS01700	EC391_RS09955	EC390_RS12780	EGM63_RS05080	EGM64_RS04525	EGM60_RS01420	EGA31_RS18785
317	13	hypothetical protein	GCF_000007865	MAP_RS01645	0		MAP_RS01645	MAP4_RS17675	RC58_RS17645	RE97_RS17670	A0V42_RS01650	CEP84_RS01975	CEG92_RS01715	EC391_RS09940	EC390_RS12795	EGM63_RS05065	EGM64_RS04540	EGM60_RS01435	EGA31_RS18800
318	13	hypothetical protein	GCF_000007865	MAP_RS01650	0		MAP_RS01650	MAP4_RS17670	RC58_RS17640	RE97_RS17665	A0V42_RS01655	CEP84_RS01970	CEG92_RS01720	EC391_RS09935	EC390_RS12800	EGM63_RS05060	EGM64_RS04545	EGM60_RS01440	EGA31_RS18805
319	13	hypothetical protein	GCF_000007865	MAP_RS01655	0		MAP_RS01655	MAP4_RS17665	RC58_RS17635	RE97_RS17660	A0V42_RS01660	CEP84_RS01965	CEG92_RS01725	EC391_RS09930	EC390_RS12805	EGM63_RS05055	EGM64_RS04550	EGM60_RS01445	EGA31_RS18810
321	13	CHAT domain-containing protein	GCF_000007865	MAP_RS01665	0		MAP_RS01665	MAP4_RS17655	RC58_RS17625	RE97_RS17650	A0V42_RS01670	CEP84_RS01955	CEG92_RS01735	EC391_RS09920	EC390_RS12815	EGM63_RS05045	EGM64_RS04560	EGM60_RS01455	EGA31_RS18820
322	13	hypothetical protein	GCF_000007865	MAP_RS01670	0		MAP_RS01670	MAP4_RS17650	RC58_RS17620	RE97_RS17645	A0V42_RS01675	CEP84_RS01950	CEG92_RS01740	EC391_RS09915	EC390_RS12820	EGM63_RS05040	EGM64_RS04565	EGM60_RS01460	EGA31_RS18825
323	13	hypothetical protein	GCF_000007865	MAP_RS01675	0		MAP_RS01675	MAP4_RS17645	RC58_RS17615	RE97_RS17640	A0V42_RS01680	CEP84_RS01945	CEG92_RS01745	EC391_RS09910	EC390_RS12825	EGM63_RS05035	EGM64_RS04570	EGM60_RS01465	EGA31_RS18830
324	13	hypothetical protein	GCF_000007865	MAP_RS01680	0		MAP_RS01680	MAP4_RS17640	RC58_RS17610	RE97_RS17635	A0V42_RS01685	CEP84_RS01940	CEG92_RS01750	EC391_RS09905	EC390_RS12830	EGM63_RS05030	EGM64_RS04575	EGM60_RS01470	EGA31_RS18835
325	13	dihydrodipicolinate reductase	GCF_000007865	MAP_RS01685	0		MAP_RS01685	MAP4_RS17635	RC58_RS17605	RE97_RS17630	A0V42_RS01690	CEP84_RS01935	CEG92_RS01755	EC391_RS09900	EC390_RS12835	EGM63_RS05025	EGM64_RS04580	EGM60_RS01475	EGA31_RS18840
326	13	cutinase family protein	GCF_000390085	MAP4_RS17630	0		MAP_RS01690	MAP4_RS17630	RC58_RS17600	RE97_RS17625	A0V42_RS01695	CEP84_RS01930	CEG92_RS01760	EC391_RS09895	EC390_RS12840	EGM63_RS05020	EGM64_RS04585	EGM60_RS01480	EGA31_RS18845
327	13	KR domain-containing protein	GCF_000007865	MAP_RS01695	0		MAP_RS01695	MAP4_RS17625	RC58_RS17595	RE97_RS17620	A0V42_RS01700	CEP84_RS01925	CEG92_RS01765	EC391_RS09890	EC390_RS12845	EGM63_RS05015	EGM64_RS04590	EGM60_RS01485	EGA31_RS18850
328	13	TetR/AcrR family transcriptional regulator	GCF_000007865	MAP_RS01700	0		MAP_RS01700	MAP4_RS17620	RC58_RS17590	RE97_RS17615	A0V42_RS01705	CEP84_RS01920	CEG92_RS01770	EC391_RS09885	EC390_RS12850	EGM63_RS05010	EGM64_RS04595	EGM60_RS01490	EGA31_RS18855
329	13	cytochrome P450	GCF_000007865	MAP_RS01705	0		MAP_RS01705	MAP4_RS17615	RC58_RS17585	RE97_RS17610	A0V42_RS01710	CEP84_RS01915	CEG92_RS01775	EC391_RS09880	EC390_RS12855	EGM63_RS05005	EGM64_RS04600	EGM60_RS01495	EGA31_RS18860
330	13	hypothetical protein	GCF_000007865	MAP_RS01710	0		MAP_RS01710	MAP4_RS17610	RC58_RS17580	RE97_RS17605	A0V42_RS01715	CEP84_RS01910	CEG92_RS01780	EC391_RS09875	EC390_RS12860	EGM63_RS05000	EGM64_RS04605	EGM60_RS01500	EGA31_RS18865
332	13	ATP-dependent DNA ligase	GCF_000007865	MAP_RS01725	0		MAP_RS01725	MAP4_RS17595	RC58_RS17565	RE97_RS17595	A0V42_RS01730	CEP84_RS01895	CEG92_RS01795	EC391_RS09860	EC390_RS12875	EGM63_RS04985	EGM64_RS04620	EGM60_RS01515	EGA31_RS01665
333	13	ATP-dependent DNA ligase	GCF_000007865	MAP_RS01730	0		MAP_RS01730	MAP4_RS17590	RC58_RS17560	RE97_RS17590	A0V42_RS01735	CEP84_RS01890	CEG92_RS01800	EC391_RS09855	EC390_RS12880	EGM63_RS04980	EGM64_RS04625	EGM60_RS01520	EGA31_RS01660
334	13	hypothetical protein	GCF_000007865	MAP_RS01735	0		MAP_RS01735	MAP4_RS17585	RC58_RS17555	RE97_RS17585	A0V42_RS01740	CEP84_RS01885	CEG92_RS01805	EC391_RS09850	EC390_RS12885	EGM63_RS04975	EGM64_RS04630	EGM60_RS01525	EGA31_RS01655
335	13	hypothetical protein	GCF_000007865	MAP_RS01740	0		MAP_RS01740	MAP4_RS17580	RC58_RS17550	RE97_RS17580	A0V42_RS01745	CEP84_RS01880	CEG92_RS01810	EC391_RS09845	EC390_RS12890	EGM63_RS04970	EGM64_RS04635	EGM60_RS01530	EGA31_RS01650
337	13	haloalkane dehalogenase	GCF_000007865	MAP_RS01750	0		MAP_RS01750	MAP4_RS17570	RC58_RS17540	RE97_RS17570	A0V42_RS01755	CEP84_RS01870	CEG92_RS01820	EC391_RS09835	EC390_RS12900	EGM63_RS04960	EGM64_RS04645	EGM60_RS01540	EGA31_RS01640
339	13	wax ester/triacylglycerol synthase family O-acyltransferase	GCF_000007865	MAP_RS01760	0		MAP_RS01760	MAP4_RS17560	RC58_RS17530	RE97_RS17560	A0V42_RS01765	CEP84_RS01860	CEG92_RS01830	EC391_RS09825	EC390_RS12910	EGM63_RS04950	EGM64_RS04655	EGM60_RS01550	EGA31_RS01630
340	13	SDR family oxidoreductase	GCF_000007865	MAP_RS01765	0		MAP_RS01765	MAP4_RS17555	RC58_RS17525	RE97_RS17555	A0V42_RS01770	CEP84_RS01855	CEG92_RS01835	EC391_RS09820	EC390_RS12915	EGM63_RS04945	EGM64_RS04660	EGM60_RS01555	EGA31_RS01625
341	13	dihydrodipicolinate reductase	GCF_000007865	MAP_RS01770	0		MAP_RS01770	MAP4_RS17550	RC58_RS17520	RE97_RS17550	A0V42_RS01775	CEP84_RS01850	CEG92_RS01840	EC391_RS09815	EC390_RS12920	EGM63_RS04940	EGM64_RS04665	EGM60_RS01560	EGA31_RS01620
342	13	hypothetical protein	GCF_000007865	MAP_RS01775	0		MAP_RS01775	MAP4_RS17545	RC58_RS17515	RE97_RS17545	A0V42_RS01780	CEP84_RS01845	CEG92_RS01845	EC391_RS09810	EC390_RS12925	EGM63_RS04935	EGM64_RS04670	EGM60_RS01565	EGA31_RS01615
343	13	NAD(P)-dependent oxidoreductase	GCF_000007865	MAP_RS01780	0		MAP_RS01780	MAP4_RS17540	RC58_RS17510	RE97_RS17540	A0V42_RS01785	CEP84_RS01840	CEG92_RS01850	EC391_RS09805	EC390_RS12930	EGM63_RS04930	EGM64_RS04675	EGM60_RS01570	EGA31_RS01610
344	13	transcriptional regulator	GCF_000007865	MAP_RS01785	0		MAP_RS01785	MAP4_RS17535	RC58_RS17505	RE97_RS17535	A0V42_RS01790	CEP84_RS01835	CEG92_RS01855	EC391_RS09800	EC390_RS12935	EGM63_RS04925	EGM64_RS04680	EGM60_RS01575	EGA31_RS01605
345	13	hypothetical protein	GCF_000007865	MAP_RS01790	0		MAP_RS01790	MAP4_RS17530	RC58_RS17500	RE97_RS17530	A0V42_RS01795	CEP84_RS01830	CEG92_RS01860	EC391_RS09795	EC390_RS12940	EGM63_RS04920	EGM64_RS04685	EGM60_RS01580	EGA31_RS01600
346	13	glycerol kinase	GCF_000007865	MAP_RS01795	0		MAP_RS01795	MAP4_RS17525	RC58_RS17495	RE97_RS17525	A0V42_RS01800	CEP84_RS01820	CEG92_RS01870	EC391_RS09785	EC390_RS12950	EGM63_RS04910	EGM64_RS04695	EGM60_RS01590	EGA31_RS18660
347	13	PadR family transcriptional regulator	GCF_000007865	MAP_RS01800	0		MAP_RS01800	MAP4_RS17520	RC58_RS17490	RE97_RS17520	A0V42_RS01805	CEP84_RS01815	CEG92_RS01875	EC391_RS09780	EC390_RS12955	EGM63_RS04905	EGM64_RS04700	EGM60_RS01595	EGA31_RS18655
348	13	hypothetical protein	GCF_000007865	MAP_RS01805	0		MAP_RS01805	MAP4_RS17515	RC58_RS17485	RE97_RS17515	A0V42_RS01810	CEP84_RS01810	CEG92_RS01880	EC391_RS09775	EC390_RS12960	EGM63_RS04900	EGM64_RS04705	EGM60_RS01600	EGA31_RS18650
349	13	RDD family protein	GCF_000007865	MAP_RS01810	0		MAP_RS01810	MAP4_RS17510	RC58_RS17480	RE97_RS17510	A0V42_RS01815	CEP84_RS01805	CEG92_RS01885	EC391_RS09770	EC390_RS12965	EGM63_RS04895	EGM64_RS04710	EGM60_RS01605	EGA31_RS18645
350	13	membrane protein	GCF_000007865	MAP_RS01815	0		MAP_RS01815	MAP4_RS17505	RC58_RS17475	RE97_RS17505	A0V42_RS01820	CEP84_RS01800	CEG92_RS01890	EC391_RS09765	EC390_RS12970	EGM63_RS04890	EGM64_RS04715	EGM60_RS01610	EGA31_RS18640
351	13	DUF58 domain-containing protein	GCF_000007865	MAP_RS01820	0		MAP_RS01820	MAP4_RS17500	RC58_RS17470	RE97_RS17500	A0V42_RS01825	CEP84_RS01795	CEG92_RS01895	EC391_RS09760	EC390_RS12975	EGM63_RS04885	EGM64_RS04720	EGM60_RS01615	EGA31_RS18635
352	13	MoxR family ATPase	GCF_000007865	MAP_RS01825	0		MAP_RS01825	MAP4_RS17495	RC58_RS17465	RE97_RS17495	A0V42_RS01830	CEP84_RS01790	CEG92_RS01900	EC391_RS09755	EC390_RS12980	EGM63_RS04880	EGM64_RS04725	EGM60_RS01620	EGA31_RS18630
353	13	DUF4350 domain-containing protein	GCF_000007865	MAP_RS01830	0		MAP_RS01830	MAP4_RS17490	RC58_RS17460	RE97_RS17490	A0V42_RS01835	CEP84_RS01785	CEG92_RS01905	EC391_RS09750	EC390_RS12985	EGM63_RS04875	EGM64_RS04730	EGM60_RS01625	EGA31_RS18625
354	13	DUF4129 domain-containing protein	GCF_000007865	MAP_RS01835	0		MAP_RS01835	MAP4_RS17485	RC58_RS17455	RE97_RS17485	A0V42_RS01840	CEP84_RS01780	CEG92_RS01910	EC391_RS09745	EC390_RS12990	EGM63_RS04870	EGM64_RS04735	EGM60_RS01630	EGA31_RS18620
356	13	GatB/YqeY domain-containing protein	GCF_000007865	MAP_RS01845	0		MAP_RS01845	MAP4_RS17475	RC58_RS17445	RE97_RS17475	A0V42_RS01850	CEP84_RS01770	CEG92_RS01920	EC391_RS09735	EC390_RS13000	EGM63_RS04860	EGM64_RS04745	EGM60_RS01640	EGA31_RS18610
357	13	translation elongation factor	GCF_000007865	MAP_RS01850	0		MAP_RS01850	MAP4_RS17470	RC58_RS17440	RE97_RS17470	A0V42_RS01855	CEP84_RS01765	CEG92_RS01925	EC391_RS09730	EC390_RS13005	EGM63_RS04855	EGM64_RS04750	EGM60_RS01645	EGA31_RS18605
358	13	L-seryl-tRNA(Sec) selenium transferase	GCF_000007865	MAP_RS01855	0		MAP_RS01855	MAP4_RS17465	RC58_RS17435	RE97_RS17465	A0V42_RS01860	CEP84_RS01760	CEG92_RS01930	EC391_RS09725	EC390_RS13010	EGM63_RS04850	EGM64_RS04755	EGM60_RS01650	EGA31_RS18600
359	13	selenide, water dikinase SelD	GCF_000007865	MAP_RS01865	0		MAP_RS01865	MAP4_RS17455	RC58_RS17425	RE97_RS17455	A0V42_RS01870	CEP84_RS01750	CEG92_RS01940	EC391_RS09715	EC390_RS13020	EGM63_RS04840	EGM64_RS04765	EGM60_RS01660	EGA31_RS18590
360	13	dehydrogenase	GCF_000007865	MAP_RS01870	0		MAP_RS01870	MAP4_RS17450	RC58_RS17420	RE97_RS17450	A0V42_RS01875	CEP84_RS01745	CEG92_RS01945	EC391_RS09710	EC390_RS13025	EGM63_RS04835	EGM64_RS04770	EGM60_RS01665	EGA31_RS18585
361	13	formate dehydrogenase	GCF_000007865	MAP_RS01875	0		MAP_RS01875	MAP4_RS17445	RC58_RS17415	RE97_RS17445	A0V42_RS01880	CEP84_RS01740	CEG92_RS01950	EC391_RS09705	EC390_RS13030	EGM63_RS04830	EGM64_RS04775	EGM60_RS01670	EGA31_RS18580
362	13	4Fe-4S dicluster domain-containing protein	GCF_000007865	MAP_RS01880	0		MAP_RS01880	MAP4_RS17440	RC58_RS17410	RE97_RS17440	A0V42_RS01885	CEP84_RS01735	CEG92_RS01955	EC391_RS09700	EC390_RS13035	EGM63_RS04825	EGM64_RS04780	EGM60_RS01675	EGA31_RS18575
363	13	nitrite reductase	GCF_000007865	MAP_RS01885	0		MAP_RS01885	MAP4_RS17435	RC58_RS17405	RE97_RS17435	A0V42_RS01890	CEP84_RS01730	CEG92_RS01960	EC391_RS09695	EC390_RS13040	EGM63_RS04820	EGM64_RS04785	EGM60_RS01680	EGA31_RS18570
364	13	TIGR03557 family F420-dependent LLM class oxidoreductase	GCF_000007865	MAP_RS01890	0		MAP_RS01890	MAP4_RS17430	RC58_RS17400	RE97_RS17430	A0V42_RS01895	CEP84_RS01725	CEG92_RS01965	EC391_RS09690	EC390_RS13045	EGM63_RS04815	EGM64_RS04790	EGM60_RS01685	EGA31_RS18565
365	13	type 1 glutamine amidotransferase	GCF_000007865	MAP_RS01895	0		MAP_RS01895	MAP4_RS17425	RC58_RS17395	RE97_RS17425	A0V42_RS01900	CEP84_RS01720	CEG92_RS01970	EC391_RS09685	EC390_RS13050	EGM63_RS04810	EGM64_RS04795	EGM60_RS01690	EGA31_RS18560
366	13	methyltransferase domain-containing protein	GCF_000007865	MAP_RS01900	0		MAP_RS01900	MAP4_RS17420	RC58_RS17390	RE97_RS17420	A0V42_RS01905	CEP84_RS01715	CEG92_RS01975	EC391_RS09680	EC390_RS13055	EGM63_RS04805	EGM64_RS04800	EGM60_RS01695	EGA31_RS18555
367	13	CDGSH iron-sulfur domain-containing protein	GCF_000007865	MAP_RS22455	0		MAP_RS22455	MAP4_RS22915	RC58_RS22965	RE97_RS23020	A0V42_RS22420	CEP84_RS01710	CEG92_RS01980	EC391_RS09675	EC390_RS13060	EGM63_RS04800	EGM64_RS04805	EGM60_RS01700	EGA31_RS18550
368	13	PAS domain S-box protein	GCF_000007865	MAP_RS01910	0		MAP_RS01910	MAP4_RS17410	RC58_RS17380	RE97_RS17410	A0V42_RS01915	CEP84_RS01700	CEG92_RS01990	EC391_RS09660	EC390_RS13075	EGM63_RS04785	EGM64_RS04820	EGM60_RS01715	EGA31_RS18540
369	13	serine/threonine protein kinase	GCF_000007865	MAP_RS01920	0		MAP_RS01920	MAP4_RS17400	RC58_RS17370	RE97_RS17400	A0V42_RS01925	CEP84_RS01690	CEG92_RS02000	EC391_RS09650	EC390_RS13085	EGM63_RS04775	EGM64_RS04830	EGM60_RS01725	EGA31_RS18530
370	13	STAS domain-containing protein	GCF_000007865	MAP_RS01925	0		MAP_RS01925	MAP4_RS17395	RC58_RS17365	RE97_RS17395	A0V42_RS01930	CEP84_RS01685	CEG92_RS02005	EC391_RS09645	EC390_RS13090	EGM63_RS04770	EGM64_RS04835	EGM60_RS01730	EGA31_RS18525
371	13	STAS domain-containing protein	GCF_000007865	MAP_RS01930	0		MAP_RS01930	MAP4_RS17390	RC58_RS17360	RE97_RS17390	A0V42_RS01935	CEP84_RS01680	CEG92_RS02010	EC391_RS09640	EC390_RS13095	EGM63_RS04765	EGM64_RS04840	EGM60_RS01735	EGA31_RS18520
372	13	anti-sigma factor antagonist	GCF_000390085	MAP4_RS17385	0		MAP_RS01935	MAP4_RS17385	RC58_RS17355	RE97_RS17385	A0V42_RS01940	CEP84_RS01675	CEG92_RS02015	EC391_RS09635	EC390_RS13100	EGM63_RS04760	EGM64_RS04845	EGM60_RS01740	EGA31_RS18515
373	13	hypothetical protein	GCF_000007865	MAP_RS01940	0		MAP_RS01940	MAP4_RS17380	RC58_RS17350	RE97_RS17380	A0V42_RS01945	CEP84_RS01670	CEG92_RS02020	EC391_RS09630	EC390_RS13105	EGM63_RS04755	EGM64_RS04850	EGM60_RS01745	EGA31_RS18510
374	13	HAD family hydrolase	GCF_000007865	MAP_RS01945	0		MAP_RS01945	MAP4_RS17375	RC58_RS17345	RE97_RS17375	A0V42_RS01950	CEP84_RS01665	CEG92_RS02025	EC391_RS09625	EC390_RS13110	EGM63_RS04750	EGM64_RS04855	EGM60_RS01750	EGA31_RS18505
375	13	hypothetical protein	GCF_000007865	MAP_RS01950	0		MAP_RS01950	MAP4_RS17370	RC58_RS17340	RE97_RS17370	A0V42_RS01955	CEP84_RS01660	CEG92_RS02030	EC391_RS09620	EC390_RS13115	EGM63_RS04745	EGM64_RS04860	EGM60_RS01755	EGA31_RS18500
376	13	DUF4193 domain-containing protein	GCF_000007865	MAP_RS01955	0		MAP_RS01955	MAP4_RS17365	RC58_RS17335	RE97_RS17365	A0V42_RS01960	CEP84_RS01655	CEG92_RS02035	EC391_RS09615	EC390_RS13120	EGM63_RS04740	EGM64_RS04865	EGM60_RS01760	EGA31_RS18495
377	13	restriction endonuclease	GCF_000007865	MAP_RS01960	0		MAP_RS01960	MAP4_RS17360	RC58_RS17330	RE97_RS17360	A0V42_RS01965	CEP84_RS01650	CEG92_RS02040	EC391_RS09610	EC390_RS13125	EGM63_RS04735	EGM64_RS04870	EGM60_RS01765	EGA31_RS18490
378	13	ANTAR domain-containing protein	GCF_000007865	MAP_RS01965	0		MAP_RS01965	MAP4_RS17355	RC58_RS17325	RE97_RS17355	A0V42_RS01970	CEP84_RS01645	CEG92_RS02045	EC391_RS09605	EC390_RS13130	EGM63_RS04730	EGM64_RS04875	EGM60_RS01770	EGA31_RS18485
379	13	hypothetical protein	GCF_000007865	MAP_RS01970	0		MAP_RS01970	MAP4_RS17350	RC58_RS17320	RE97_RS17350	A0V42_RS01975	CEP84_RS01640	CEG92_RS02050	EC391_RS09600	EC390_RS13135	EGM63_RS04725	EGM64_RS04880	EGM60_RS01775	EGA31_RS18480
380	13	hypothetical protein	GCF_000007865	MAP_RS01975	0		MAP_RS01975	MAP4_RS17345	RC58_RS17315	RE97_RS17345	A0V42_RS01980	CEP84_RS01635	CEG92_RS02055	EC391_RS09595	EC390_RS13140	EGM63_RS04720	EGM64_RS04885	EGM60_RS01780	EGA31_RS18475
381	13	hypothetical protein	GCF_000007865	MAP_RS01980	0		MAP_RS01980	MAP4_RS17340	RC58_RS17310	RE97_RS17340	A0V42_RS01985	CEP84_RS01630	CEG92_RS02060	EC391_RS09590	EC390_RS13145	EGM63_RS04715	EGM64_RS04890	EGM60_RS01785	EGA31_RS18470
382	13	lyase	GCF_000007865	MAP_RS01990	0		MAP_RS01990	MAP4_RS17330	RC58_RS17300	RE97_RS17330	A0V42_RS01995	CEP84_RS01620	CEG92_RS02070	EC391_RS09580	EC390_RS13155	EGM63_RS04705	EGM64_RS04900	EGM60_RS01795	EGA31_RS18460
383	13	metallophosphoesterase	GCF_000007865	MAP_RS01995	0		MAP_RS01995	MAP4_RS17325	RC58_RS17295	RE97_RS17325	A0V42_RS02000	CEP84_RS01615	CEG92_RS02075	EC391_RS09575	EC390_RS13160	EGM63_RS04700	EGM64_RS04905	EGM60_RS01800	EGA31_RS18455
385	13	WhiB family transcriptional regulator	GCF_000007865	MAP_RS02005	0		MAP_RS02005	MAP4_RS17315	RC58_RS17285	RE97_RS17315	A0V42_RS02010	CEP84_RS01605	CEG92_RS02085	EC391_RS09565	EC390_RS13170	EGM63_RS04690	EGM64_RS04915	EGM60_RS01810	EGA31_RS18445
386	13	anion transporter	GCF_000007865	MAP_RS02010	0		MAP_RS02010	MAP4_RS17310	RC58_RS17280	RE97_RS17310	A0V42_RS02015	CEP84_RS01600	CEG92_RS02090	EC391_RS09560	EC390_RS13175	EGM63_RS04685	EGM64_RS04920	EGM60_RS01815	EGA31_RS18440
387	13	ATPase	GCF_000007865	MAP_RS02015	0		MAP_RS02015	MAP4_RS17305	RC58_RS17275	RE97_RS17305	A0V42_RS02020	CEP84_RS01595	CEG92_RS02095	EC391_RS09555	EC390_RS13180	EGM63_RS04680	EGM64_RS04925	EGM60_RS01820	EGA31_RS18435
389	13	RidA family protein	GCF_000007865	MAP_RS02020	0		MAP_RS02020	MAP4_RS17300	RC58_RS17270	RE97_RS17300	A0V42_RS02025	CEP84_RS01585	CEG92_RS02105	EC391_RS09545	EC390_RS13190	EGM63_RS04670	EGM64_RS04935	EGM60_RS01830	EGA31_RS18425
390	13	MBL fold metallo-hydrolase	GCF_000007865	MAP_RS02025	0		MAP_RS02025	MAP4_RS17295	RC58_RS17265	RE97_RS17295	A0V42_RS02030	CEP84_RS01580	CEG92_RS02110	EC391_RS09540	EC390_RS13195	EGM63_RS04665	EGM64_RS04940	EGM60_RS01835	EGA31_RS18420
391	13	cAMP receptor protein	GCF_000007865	MAP_RS02030	0		MAP_RS02030	MAP4_RS17290	RC58_RS17260	RE97_RS17290	A0V42_RS02035	CEP84_RS01575	CEG92_RS02115	EC391_RS09535	EC390_RS13200	EGM63_RS04660	EGM64_RS04945	EGM60_RS01840	EGA31_RS18415
392	13	hypothetical protein	GCF_000007865	MAP_RS02035	0		MAP_RS02035	MAP4_RS17285	RC58_RS17255	RE97_RS17285	A0V42_RS02040	CEP84_RS01570	CEG92_RS02120	EC391_RS09530	EC390_RS13205	EGM63_RS04655	EGM64_RS04950	EGM60_RS01845	EGA31_RS18410
393	13	endonuclease III	GCF_000007865	MAP_RS02040	0		MAP_RS02040	MAP4_RS17280	RC58_RS17250	RE97_RS17280	A0V42_RS02045	CEP84_RS01565	CEG92_RS02125	EC391_RS09525	EC390_RS13210	EGM63_RS04650	EGM64_RS04955	EGM60_RS01850	EGA31_RS18405
395	13	CoA pyrophosphatase	GCF_000007865	MAP_RS02050	0		MAP_RS02050	MAP4_RS17270	RC58_RS17240	RE97_RS17270	A0V42_RS02055	CEP84_RS01555	CEG92_RS02135	EC391_RS09515	EC390_RS13220	EGM63_RS04640	EGM64_RS04965	EGM60_RS01860	EGA31_RS18395
396	13	serine protease	GCF_000007865	MAP_RS02055	0		MAP_RS02055	MAP4_RS17265	RC58_RS17235	RE97_RS17265	A0V42_RS02060	CEP84_RS01550	CEG92_RS02140	EC391_RS09510	EC390_RS13225	EGM63_RS04635	EGM64_RS04970	EGM60_RS01865	EGA31_RS18390
397	13	alpha/beta hydrolase	GCF_000007865	MAP_RS02060	0		MAP_RS02060	MAP4_RS17260	RC58_RS17230	RE97_RS17260	A0V42_RS02065	CEP84_RS01545	CEG92_RS02145	EC391_RS09505	EC390_RS13230	EGM63_RS04630	EGM64_RS04975	EGM60_RS01870	EGA31_RS18385
398	13	phage holin family protein	GCF_000007865	MAP_RS02065	0		MAP_RS02065	MAP4_RS17255	RC58_RS17225	RE97_RS17255	A0V42_RS02070	CEP84_RS01540	CEG92_RS02150	EC391_RS09500	EC390_RS13235	EGM63_RS04625	EGM64_RS04980	EGM60_RS01875	EGA31_RS18380
399	13	peptidase	GCF_000390085	MAP4_RS17250	0		MAP_RS02070	MAP4_RS17250	RC58_RS17220	RE97_RS17250	A0V42_RS02075	CEP84_RS01535	CEG92_RS02155	EC391_RS09495	EC390_RS13240	EGM63_RS04620	EGM64_RS04985	EGM60_RS01880	EGA31_RS18375
400	13	acetate--CoA ligase	GCF_000007865	MAP_RS02075	0		MAP_RS02075	MAP4_RS17245	RC58_RS17215	RE97_RS17245	A0V42_RS02080	CEP84_RS01530	CEG92_RS02160	EC391_RS09490	EC390_RS13245	EGM63_RS04615	EGM64_RS04990	EGM60_RS01885	EGA31_RS18370
401	13	DUF4232 domain-containing protein	GCF_000007865	MAP_RS02080	0		MAP_RS02080	MAP4_RS17240	RC58_RS17210	RE97_RS17240	A0V42_RS02085	CEP84_RS01525	CEG92_RS02165	EC391_RS09485	EC390_RS13250	EGM63_RS04610	EGM64_RS04995	EGM60_RS01890	EGA31_RS18365
402	13	ABC transporter substrate-binding protein	GCF_000007865	MAP_RS02085	0		MAP_RS02085	MAP4_RS17235	RC58_RS17205	RE97_RS17235	A0V42_RS02090	CEP84_RS01520	CEG92_RS02170	EC391_RS09480	EC390_RS13255	EGM63_RS04605	EGM64_RS05000	EGM60_RS01895	EGA31_RS18360
403	13	ABC transporter permease	GCF_000007865	MAP_RS02090	0		MAP_RS02090	MAP4_RS17230	RC58_RS17200	RE97_RS17230	A0V42_RS02095	CEP84_RS01515	CEG92_RS02175	EC391_RS09475	EC390_RS13260	EGM63_RS04600	EGM64_RS05005	EGM60_RS01900	EGA31_RS18355
404	13	ABC transporter permease	GCF_000007865	MAP_RS02095	0		MAP_RS02095	MAP4_RS17225	RC58_RS17195	RE97_RS17225	A0V42_RS02100	CEP84_RS01510	CEG92_RS02180	EC391_RS09470	EC390_RS13265	EGM63_RS04595	EGM64_RS05010	EGM60_RS01905	EGA31_RS18350
405	13	ABC transporter ATP-binding protein	GCF_000007865	MAP_RS02100	0		MAP_RS02100	MAP4_RS17220	RC58_RS17190	RE97_RS17220	A0V42_RS02105	CEP84_RS01505	CEG92_RS02185	EC391_RS09465	EC390_RS13270	EGM63_RS04590	EGM64_RS05015	EGM60_RS01910	EGA31_RS18345
407	13	HAD-IB family hydrolase	GCF_000007865	MAP_RS02110	0		MAP_RS02110	MAP4_RS17210	RC58_RS17180	RE97_RS17210	A0V42_RS02115	CEP84_RS01490	CEG92_RS02200	EC391_RS09450	EC390_RS13285	EGM63_RS04575	EGM64_RS05030	EGM60_RS01925	EGA31_RS18330
408	13	hypothetical protein	GCF_000007865	MAP_RS02115	0		MAP_RS02115	MAP4_RS17205	RC58_RS17175	RE97_RS17205	A0V42_RS02120	CEP84_RS01485	CEG92_RS02210	EC391_RS09445	EC390_RS13290	EGM63_RS04570	EGM64_RS05035	EGM60_RS01930	EGA31_RS18320
410	13	membrane protein	GCF_000007865	MAP_RS02125	0	FG-In	MAP_RS02125	MAP4_RS17195	RC58_RS17165	RE97_RS17195	A0V42_RS02130	CEP84_RS01475	CEG92_RS02220	EC391_RS09435	EC390_RS13300	EGM63_RS04560	EGM64_RS05045	EGM60_RS01940	EGA31_RS18310
412	13	DUF4244 domain-containing protein	GCF_000007865	MAP_RS02135	0		MAP_RS02135	MAP4_RS17185	RC58_RS17155	RE97_RS17185	A0V42_RS02140	CEP84_RS01465	CEG92_RS02230	EC391_RS09425	EC390_RS13310	EGM63_RS04550	EGM64_RS05055	EGM60_RS01950	EGA31_RS18300
413	13	hypothetical protein	GCF_000007865	MAP_RS02140	0		MAP_RS02140	MAP4_RS17180	RC58_RS17150	RE97_RS17180	A0V42_RS02145	CEP84_RS01460	CEG92_RS02235	EC391_RS09420	EC390_RS13315	EGM63_RS04545	EGM64_RS05060	EGM60_RS01955	EGA31_RS18295
414	13	helicase	GCF_000007865	MAP_RS02145	0		MAP_RS02145	MAP4_RS17175	RC58_RS17145	RE97_RS17175	A0V42_RS02150	CEP84_RS01455	CEG92_RS02240	EC391_RS09415	EC390_RS13320	EGM63_RS04540	EGM64_RS05065	EGM60_RS01960	EGA31_RS18290
415	13	hypothetical protein	GCF_000390085	MAP4_RS17170	0		MAP_RS02150	MAP4_RS17170	RC58_RS17140	RE97_RS17170	A0V42_RS02155	CEP84_RS01450	CEG92_RS02245	EC391_RS09410	EC390_RS13325	EGM63_RS04535	EGM64_RS05070	EGM60_RS01965	EGA31_RS18285
416	13	DUF1998 domain-containing protein	GCF_000007865	MAP_RS02155	0		MAP_RS02155	MAP4_RS17165	RC58_RS17135	RE97_RS17165	A0V42_RS02160	CEP84_RS01445	CEG92_RS02250	EC391_RS09405	EC390_RS13330	EGM63_RS04530	EGM64_RS05075	EGM60_RS01970	EGA31_RS18280
417	13	cold-shock protein	GCF_000007865	MAP_RS02160	0		MAP_RS02160	MAP4_RS17160	RC58_RS17130	RE97_RS17160	A0V42_RS02165	CEP84_RS01440	CEG92_RS02255	EC391_RS09400	EC390_RS13335	EGM63_RS04525	EGM64_RS05080	EGM60_RS01975	EGA31_RS18275
418	13	hypothetical protein	GCF_000007865	MAP_RS02165	0		MAP_RS02165	MAP4_RS17155	RC58_RS17125	RE97_RS17155	A0V42_RS02170	CEP84_RS01435	CEG92_RS02260	EC391_RS09395	EC390_RS13340	EGM63_RS04520	EGM64_RS05085	EGM60_RS01980	EGA31_RS18270
419	13	type I DNA topoisomerase	GCF_000007865	MAP_RS02170	0		MAP_RS02170	MAP4_RS17150	RC58_RS17120	RE97_RS17150	A0V42_RS02175	CEP84_RS01430	CEG92_RS02265	EC391_RS09390	EC390_RS13345	EGM63_RS04515	EGM64_RS05090	EGM60_RS01985	EGA31_RS18265
420	13	adenylate/guanylate cyclase domain-containing protein	GCF_000007865	MAP_RS02175	0		MAP_RS02175	MAP4_RS17145	RC58_RS17115	RE97_RS17145	A0V42_RS02180	CEP84_RS01425	CEG92_RS02270	EC391_RS09385	EC390_RS13350	EGM63_RS04510	EGM64_RS05095	EGM60_RS01990	EGA31_RS18260
423	13	hypothetical protein	GCF_000007865	MAP_RS02195	0		MAP_RS02195	MAP4_RS17125	RC58_RS17090	RE97_RS17120	A0V42_RS02200	CEP84_RS01405	CEG92_RS02290	EC391_RS09365	EC390_RS13370	EGM63_RS04490	EGM64_RS05115	EGM60_RS02010	EGA31_RS18240
424	13	UDP-glucose 4-epimerase	GCF_000007865	MAP_RS02200	0		MAP_RS02200	MAP4_RS17120	RC58_RS17085	RE97_RS17115	A0V42_RS02205	CEP84_RS01400	CEG92_RS02295	EC391_RS09360	EC390_RS13375	EGM63_RS04485	EGM64_RS05120	EGM60_RS02015	EGA31_RS18235
425	13	DUF2304 domain-containing protein	GCF_000007865	MAP_RS02205	0		MAP_RS02205	MAP4_RS17115	RC58_RS17080	RE97_RS17110	A0V42_RS02210	CEP84_RS01395	CEG92_RS02300	EC391_RS09355	EC390_RS13380	EGM63_RS04480	EGM64_RS05125	EGM60_RS02020	EGA31_RS18230
426	13	glycosyltransferase family 2 protein	GCF_000007865	MAP_RS02210	0		MAP_RS02210	MAP4_RS17110	RC58_RS17075	RE97_RS17105	A0V42_RS02215	CEP84_RS01390	CEG92_RS02305	EC391_RS09350	EC390_RS13385	EGM63_RS04475	EGM64_RS05130	EGM60_RS02025	EGA31_RS18225
427	13	hypothetical protein	GCF_000007865	MAP_RS02215	0		MAP_RS02215	MAP4_RS17105	RC58_RS17070	RE97_RS17100	A0V42_RS02220	CEP84_RS01385	CEG92_RS02310	EC391_RS09345	EC390_RS13390	EGM63_RS04470	EGM64_RS05135	EGM60_RS02030	EGA31_RS18220
428	13	DUF475 domain-containing protein	GCF_000007865	MAP_RS02220	0		MAP_RS02220	MAP4_RS17100	RC58_RS17065	RE97_RS17095	A0V42_RS02225	CEP84_RS01380	CEG92_RS02315	EC391_RS09340	EC390_RS13395	EGM63_RS04465	EGM64_RS05140	EGM60_RS02035	EGA31_RS18215
429	13	inorganic pyrophosphatase	GCF_000007865	MAP_RS02225	0		MAP_RS02225	MAP4_RS17095	RC58_RS17060	RE97_RS17090	A0V42_RS02230	CEP84_RS01375	CEG92_RS02320	EC391_RS09335	EC390_RS13400	EGM63_RS04460	EGM64_RS05145	EGM60_RS02040	EGA31_RS18210
430	13	D-alanyl-D-alanine carboxypeptidase/D-alanyl-D-alanine-endopeptidase	GCF_000007865	MAP_RS02230	0		MAP_RS02230	MAP4_RS17090	RC58_RS17055	RE97_RS17085	A0V42_RS02235	CEP84_RS01370	CEG92_RS02325	EC391_RS09330	EC390_RS13405	EGM63_RS04455	EGM64_RS05150	EGM60_RS02045	EGA31_RS18205
431	13	hydrolase	GCF_000007865	MAP_RS02235	0		MAP_RS02235	MAP4_RS17085	RC58_RS17050	RE97_RS17080	A0V42_RS02240	CEP84_RS01365	CEG92_RS02330	EC391_RS09325	EC390_RS13410	EGM63_RS04450	EGM64_RS05155	EGM60_RS02050	EGA31_RS18200
433	13	hypoxanthine phosphoribosyltransferase	GCF_000007865	MAP_RS02245	0		MAP_RS02245	MAP4_RS17075	RC58_RS17040	RE97_RS17070	A0V42_RS02250	CEP84_RS01355	CEG92_RS02340	EC391_RS09315	EC390_RS13420	EGM63_RS04440	EGM64_RS05165	EGM60_RS02060	EGA31_RS18190
434	13	DUF541 domain-containing protein	GCF_000007865	MAP_RS02250	0		MAP_RS02250	MAP4_RS17070	RC58_RS17035	RE97_RS17065	A0V42_RS02255	CEP84_RS01350	CEG92_RS02345	EC391_RS09310	EC390_RS13425	EGM63_RS04435	EGM64_RS05170	EGM60_RS02065	EGA31_RS18185
435	13	PE family protein	GCF_000007865	MAP_RS02255	0		MAP_RS02255	MAP4_RS17065	RC58_RS17030	RE97_RS17060	A0V42_RS02260	CEP84_RS01345	CEG92_RS02350	EC391_RS09305	EC390_RS13430	EGM63_RS04430	EGM64_RS05175	EGM60_RS02070	EGA31_RS18180
437	13	alcohol dehydrogenase	GCF_000007865	MAP_RS02275	0		MAP_RS02275	MAP4_RS17045	RC58_RS17010	RE97_RS17040	A0V42_RS02275	CEP84_RS01330	CEG92_RS02365	EC391_RS09290	EC390_RS13445	EGM63_RS04415	EGM64_RS05190	EGM60_RS02085	EGA31_RS18165
438	13	LLM class flavin-dependent oxidoreductase	GCF_000007865	MAP_RS02280	0		MAP_RS02280	MAP4_RS17040	RC58_RS17005	RE97_RS17035	A0V42_RS02280	CEP84_RS01325	CEG92_RS02370	EC391_RS09285	EC390_RS13450	EGM63_RS04410	EGM64_RS05195	EGM60_RS02090	EGA31_RS18160
439	13	alpha/beta hydrolase	GCF_000007865	MAP_RS02285	0		MAP_RS02285	MAP4_RS17035	RC58_RS17000	RE97_RS17030	A0V42_RS02285	CEP84_RS01320	CEG92_RS02375	EC391_RS09280	EC390_RS13455	EGM63_RS04405	EGM64_RS05200	EGM60_RS02095	EGA31_RS18155
440	13	dioxygenase	GCF_000007865	MAP_RS02290	0		MAP_RS02290	MAP4_RS17030	RC58_RS16995	RE97_RS17025	A0V42_RS02290	CEP84_RS01315	CEG92_RS02380	EC391_RS09275	EC390_RS13460	EGM63_RS04400	EGM64_RS05205	EGM60_RS02100	EGA31_RS18150
442	13	ATP-dependent zinc metalloprotease FtsH	GCF_000007865	MAP_RS02300	0		MAP_RS02300	MAP4_RS17020	RC58_RS16985	RE97_RS17015	A0V42_RS02300	CEP84_RS01305	CEG92_RS02390	EC391_RS09265	EC390_RS13470	EGM63_RS04390	EGM64_RS05215	EGM60_RS02110	EGA31_RS18140
443	13	GTP cyclohydrolase I FolE	GCF_000007865	MAP_RS02305	0		MAP_RS02305	MAP4_RS17015	RC58_RS16980	RE97_RS17010	A0V42_RS02305	CEP84_RS01300	CEG92_RS02395	EC391_RS09260	EC390_RS13475	EGM63_RS04385	EGM64_RS05220	EGM60_RS02115	EGA31_RS18135
444	13	dihydropteroate synthase	GCF_000007865	MAP_RS02310	0		MAP_RS02310	MAP4_RS17010	RC58_RS16975	RE97_RS17005	A0V42_RS02310	CEP84_RS01295	CEG92_RS02400	EC391_RS09255	EC390_RS13480	EGM63_RS04380	EGM64_RS05225	EGM60_RS02120	EGA31_RS18130
445	13	dihydroneopterin aldolase	GCF_000007865	MAP_RS02315	0		MAP_RS02315	MAP4_RS17005	RC58_RS16970	RE97_RS17000	A0V42_RS02315	CEP84_RS01290	CEG92_RS02405	EC391_RS09250	EC390_RS13485	EGM63_RS04375	EGM64_RS05230	EGM60_RS02125	EGA31_RS18125
446	13	2-amino-4-hydroxy-6- hydroxymethyldihydropteridine diphosphokinase	GCF_000007865	MAP_RS02320	0		MAP_RS02320	MAP4_RS17000	RC58_RS16965	RE97_RS16995	A0V42_RS02320	CEP84_RS01285	CEG92_RS02410	EC391_RS09245	EC390_RS13490	EGM63_RS04370	EGM64_RS05235	EGM60_RS02130	EGA31_RS18120
447	13	DUF3180 domain-containing protein	GCF_000007865	MAP_RS02325	0		MAP_RS02325	MAP4_RS16995	RC58_RS16960	RE97_RS16990	A0V42_RS02325	CEP84_RS01280	CEG92_RS02415	EC391_RS09240	EC390_RS13495	EGM63_RS04365	EGM64_RS05240	EGM60_RS02135	EGA31_RS18115
449	13	DUF2520 domain-containing protein	GCF_000007865	MAP_RS02335	0		MAP_RS02335	MAP4_RS16985	RC58_RS16950	RE97_RS16980	A0V42_RS02335	CEP84_RS01270	CEG92_RS02425	EC391_RS09230	EC390_RS13505	EGM63_RS04355	EGM64_RS05250	EGM60_RS02145	EGA31_RS18105
450	13	pantoate--beta-alanine ligase	GCF_000007865	MAP_RS02340	0		MAP_RS02340	MAP4_RS16980	RC58_RS16945	RE97_RS16975	A0V42_RS02340	CEP84_RS01265	CEG92_RS02430	EC391_RS09225	EC390_RS13510	EGM63_RS04350	EGM64_RS05255	EGM60_RS02150	EGA31_RS18100
451	13	aspartate 1-decarboxylase	GCF_000007865	MAP_RS02345	0		MAP_RS02345	MAP4_RS16975	RC58_RS16940	RE97_RS16970	A0V42_RS02345	CEP84_RS01260	CEG92_RS02435	EC391_RS09220	EC390_RS13515	EGM63_RS04345	EGM64_RS05260	EGM60_RS02155	EGA31_RS18095
452	13	type III pantothenate kinase	GCF_000007865	MAP_RS02350	0		MAP_RS02350	MAP4_RS16970	RC58_RS16935	RE97_RS16965	A0V42_RS02350	CEP84_RS01255	CEG92_RS02440	EC391_RS09215	EC390_RS13520	EGM63_RS04340	EGM64_RS05265	EGM60_RS02160	EGA31_RS18090
453	13	lysine--tRNA ligase	GCF_000007865	MAP_RS02355	0		MAP_RS02355	MAP4_RS16965	RC58_RS16930	RE97_RS16960	A0V42_RS02355	CEP84_RS01250	CEG92_RS02445	EC391_RS09210	EC390_RS13525	EGM63_RS04335	EGM64_RS05270	EGM60_RS02165	EGA31_RS18085
454	13	Lsr2 family protein	GCF_000007865	MAP_RS02360	0		MAP_RS02360	MAP4_RS16960	RC58_RS16925	RE97_RS16955	A0V42_RS02360	CEP84_RS01245	CEG92_RS02450	EC391_RS09205	EC390_RS13530	EGM63_RS04330	EGM64_RS05275	EGM60_RS02170	EGA31_RS18080
455	13	ATP-dependent Clp protease ATP-binding subunit	GCF_000007865	MAP_RS02365	0		MAP_RS02365	MAP4_RS16955	RC58_RS16920	RE97_RS16950	A0V42_RS02365	CEP84_RS01240	CEG92_RS02455	EC391_RS09200	EC390_RS13535	EGM63_RS04325	EGM64_RS05280	EGM60_RS02175	EGA31_RS18075
456	13	CbtB-domain containing protein	GCF_000007865	MAP_RS02370	0		MAP_RS02370	MAP4_RS16950	RC58_RS16915	RE97_RS16945	A0V42_RS02370	CEP84_RS01235	CEG92_RS02460	EC391_RS09195	EC390_RS13540	EGM63_RS04320	EGM64_RS05285	EGM60_RS02180	EGA31_RS18070
457	13	cobalt transporter	GCF_000007865	MAP_RS02375	0		MAP_RS02375	MAP4_RS16945	RC58_RS16910	RE97_RS16940	A0V42_RS02375	CEP84_RS01230	CEG92_RS02465	EC391_RS09190	EC390_RS13545	EGM63_RS04315	EGM64_RS05290	EGM60_RS02185	EGA31_RS18065
458	13	histidine phosphatase family protein	GCF_000007865	MAP_RS02380	0		MAP_RS02380	MAP4_RS16940	RC58_RS16905	RE97_RS16935	A0V42_RS02380	CEP84_RS01225	CEG92_RS02470	EC391_RS09185	EC390_RS13550	EGM63_RS04310	EGM64_RS05295	EGM60_RS02190	EGA31_RS18060
459	13	lignostilbene-alpha,beta-dioxygenase-like enzyme	GCF_000007865	MAP_RS02385	0		MAP_RS02385	MAP4_RS16935	RC58_RS16900	RE97_RS16930	A0V42_RS02385	CEP84_RS01220	CEG92_RS02475	EC391_RS09180	EC390_RS13555	EGM63_RS04305	EGM64_RS05300	EGM60_RS02195	EGA31_RS18055
460	13	serine hydrolase	GCF_000007865	MAP_RS02390	0		MAP_RS02390	MAP4_RS16930	RC58_RS16895	RE97_RS16925	A0V42_RS02390	CEP84_RS01215	CEG92_RS02480	EC391_RS09175	EC390_RS13560	EGM63_RS04300	EGM64_RS05305	EGM60_RS02200	EGA31_RS18050
461	13	mycobilin-forming heme oxygenase MhuD	GCF_000007865	MAP_RS02395	0		MAP_RS02395	MAP4_RS16925	RC58_RS16890	RE97_RS16920	A0V42_RS02395	CEP84_RS01210	CEG92_RS02485	EC391_RS09170	EC390_RS13565	EGM63_RS04295	EGM64_RS05310	EGM60_RS02205	EGA31_RS18045
462	13	alpha/beta hydrolase	GCF_000007865	MAP_RS02400	0		MAP_RS02400	MAP4_RS16920	RC58_RS16885	RE97_RS16915	A0V42_RS02400	CEP84_RS01205	CEG92_RS02490	EC391_RS09165	EC390_RS13570	EGM63_RS04290	EGM64_RS05315	EGM60_RS02210	EGA31_RS18040
464	13	carbonic anhydrase	GCF_000007865	MAP_RS02410	0		MAP_RS02410	MAP4_RS16910	RC58_RS16875	RE97_RS16905	A0V42_RS02410	CEP84_RS01195	CEG92_RS02500	EC391_RS09155	EC390_RS13580	EGM63_RS04280	EGM64_RS05325	EGM60_RS02220	EGA31_RS18030
465	13	hypothetical protein	GCF_000007865	MAP_RS02415	0		MAP_RS02415	MAP4_RS16905	RC58_RS16870	RE97_RS16900	A0V42_RS02415	CEP84_RS01190	CEG92_RS02505	EC391_RS09150	EC390_RS13585	EGM63_RS04275	EGM64_RS05330	EGM60_RS02225	EGA31_RS18025
466	13	dna integrity scanning protein disa	GCF_000007865	MAP_RS02420	0		MAP_RS02420	MAP4_RS16900	RC58_RS16865	RE97_RS16895	A0V42_RS02420	CEP84_RS01185	CEG92_RS02510	EC391_RS09145	EC390_RS13590	EGM63_RS04270	EGM64_RS05335	EGM60_RS02230	EGA31_RS18020
467	13	DNA repair protein RadA	GCF_000007865	MAP_RS02425	0		MAP_RS02425	MAP4_RS16895	RC58_RS16860	RE97_RS16890	A0V42_RS02425	CEP84_RS01180	CEG92_RS02515	EC391_RS09140	EC390_RS13595	EGM63_RS04265	EGM64_RS05340	EGM60_RS02235	EGA31_RS18015
468	13	hypothetical protein	GCF_000007865	MAP_RS02430	0		MAP_RS02430	MAP4_RS16890	RC58_RS16855	RE97_RS16885	A0V42_RS02430	CEP84_RS01175	CEG92_RS02520	EC391_RS09135	EC390_RS13600	EGM63_RS04260	EGM64_RS05345	EGM60_RS02240	EGA31_RS18010
469	13	RNA polymerase-binding transcription factor CarD	GCF_000007865	MAP_RS02435	0		MAP_RS02435	MAP4_RS16885	RC58_RS16850	RE97_RS16880	A0V42_RS02435	CEP84_RS01170	CEG92_RS02525	EC391_RS09130	EC390_RS13605	EGM63_RS04255	EGM64_RS05350	EGM60_RS02245	EGA31_RS18005
470	13	2-C-methyl-D-erythritol 4-phosphate cytidylyltransferase	GCF_000007865	MAP_RS02440	0		MAP_RS02440	MAP4_RS16880	RC58_RS16845	RE97_RS16875	A0V42_RS02440	CEP84_RS01165	CEG92_RS02530	EC391_RS09125	EC390_RS13610	EGM63_RS04250	EGM64_RS05355	EGM60_RS02250	EGA31_RS18000
471	13	2-C-methyl-D-erythritol 2,4-cyclodiphosphate synthase	GCF_000007865	MAP_RS02445	0		MAP_RS02445	MAP4_RS16875	RC58_RS16840	RE97_RS16870	A0V42_RS02445	CEP84_RS01160	CEG92_RS02535	EC391_RS09120	EC390_RS13615	EGM63_RS04245	EGM64_RS05360	EGM60_RS02255	EGA31_RS17995
472	13	cysteine--tRNA ligase	GCF_000007865	MAP_RS02450	0		MAP_RS02450	MAP4_RS16870	RC58_RS16835	RE97_RS16865	A0V42_RS02450	CEP84_RS01155	CEG92_RS02540	EC391_RS09115	EC390_RS13620	EGM63_RS04240	EGM64_RS05365	EGM60_RS02260	EGA31_RS17990
473	13	23S rRNA (guanosine(2251)-2'-O)-methyltransferase RlmB	GCF_000007865	MAP_RS02455	0		MAP_RS02455	MAP4_RS16865	RC58_RS16830	RE97_RS16860	A0V42_RS02455	CEP84_RS01150	CEG92_RS02545	EC391_RS09110	EC390_RS13625	EGM63_RS04235	EGM64_RS05370	EGM60_RS02265	EGA31_RS17985
474	13	glycerophosphoryl diester phosphodiesterase	GCF_000007865	MAP_RS02460	0		MAP_RS02460	MAP4_RS16860	RC58_RS16825	RE97_RS16855	A0V42_RS02460	CEP84_RS01145	CEG92_RS02550	EC391_RS09105	EC390_RS13630	EGM63_RS04230	EGM64_RS05375	EGM60_RS02270	EGA31_RS17980
475	13	2-polyprenyl-6-methoxyphenol hydroxylase	GCF_000007865	MAP_RS02465	0		MAP_RS02465	MAP4_RS16855	RC58_RS16820	RE97_RS16850	A0V42_RS02465	CEP84_RS01140	CEG92_RS02555	EC391_RS09100	EC390_RS13635	EGM63_RS04225	EGM64_RS05380	EGM60_RS02275	EGA31_RS17975
476	13	arsenic transporter	GCF_000007865	MAP_RS02475	0		MAP_RS02475	MAP4_RS16845	RC58_RS16810	RE97_RS16840	A0V42_RS02475	CEP84_RS01130	CEG92_RS02565	EC391_RS09090	EC390_RS13645	EGM63_RS04215	EGM64_RS05390	EGM60_RS02285	EGA31_RS17965
477	13	MBL fold metallo-hydrolase	GCF_000007865	MAP_RS02480	0		MAP_RS02480	MAP4_RS16840	RC58_RS16805	RE97_RS16835	A0V42_RS02480	CEP84_RS01125	CEG92_RS02570	EC391_RS09085	EC390_RS13650	EGM63_RS04210	EGM64_RS05395	EGM60_RS02290	EGA31_RS17960
478	13	LamB/YcsF family protein	GCF_000007865	MAP_RS02485	0		MAP_RS02485	MAP4_RS16835	RC58_RS16800	RE97_RS16830	A0V42_RS02485	CEP84_RS01120	CEG92_RS02575	EC391_RS09080	EC390_RS13655	EGM63_RS04205	EGM64_RS05400	EGM60_RS02295	EGA31_RS17955
479	13	metal ABC transporter permease	GCF_000007865	MAP_RS02490	0		MAP_RS02490	MAP4_RS16830	RC58_RS16795	RE97_RS16825	A0V42_RS02490	CEP84_RS01115	CEG92_RS02580	EC391_RS09075	EC390_RS13660	EGM63_RS04200	EGM64_RS05405	EGM60_RS02300	EGA31_RS17950
480	13	metal ABC transporter ATP-binding protein	GCF_000007865	MAP_RS02495	0		MAP_RS02495	MAP4_RS16825	RC58_RS16790	RE97_RS16820	A0V42_RS02495	CEP84_RS01110	CEG92_RS02585	EC391_RS09070	EC390_RS13665	EGM63_RS04195	EGM64_RS05410	EGM60_RS02305	EGA31_RS17945
481	13	ABC transporter substrate-binding protein	GCF_000007865	MAP_RS02500	0		MAP_RS02500	MAP4_RS16820	RC58_RS16785	RE97_RS16815	A0V42_RS02500	CEP84_RS01105	CEG92_RS02590	EC391_RS09065	EC390_RS13670	EGM63_RS04190	EGM64_RS05415	EGM60_RS02310	EGA31_RS17940
482	13	LacI family DNA-binding transcriptional regulator	GCF_000007865	MAP_RS02505	0		MAP_RS02505	MAP4_RS16815	RC58_RS16780	RE97_RS16810	A0V42_RS02505	CEP84_RS01100	CEG92_RS02595	EC391_RS09060	EC390_RS13675	EGM63_RS04185	EGM64_RS05420	EGM60_RS02315	EGA31_RS17935
483	13	cholesterol catabolism transcriptional regulator KstR	GCF_000835225	RC58_RS16775	0		MAP_RS02510	MAP4_RS16810	RC58_RS16775	RE97_RS16805	A0V42_RS02510	CEP84_RS01095	CEG92_RS02600	EC391_RS09055	EC390_RS13680	EGM63_RS04180	EGM64_RS05425	EGM60_RS02320	EGA31_RS17930
484	13	acyl-CoA dehydrogenase	GCF_000007865	MAP_RS02515	0		MAP_RS02515	MAP4_RS16805	RC58_RS16770	RE97_RS16800	A0V42_RS02515	CEP84_RS01090	CEG92_RS02605	EC391_RS09050	EC390_RS13685	EGM63_RS04175	EGM64_RS05430	EGM60_RS02325	EGA31_RS17925
485	13	TetR family transcriptional regulator	GCF_000007865	MAP_RS02520	0		MAP_RS02520	MAP4_RS16800	RC58_RS16765	RE97_RS16795	A0V42_RS02520	CEP84_RS01085	CEG92_RS02610	EC391_RS09045	EC390_RS13690	EGM63_RS04170	EGM64_RS05435	EGM60_RS02330	EGA31_RS17920
486	13	3-beta hydroxysteroid dehydrogenase	GCF_000007865	MAP_RS02525	0		MAP_RS02525	MAP4_RS16795	RC58_RS16760	RE97_RS16790	A0V42_RS02525	CEP84_RS01080	CEG92_RS02615	EC391_RS09040	EC390_RS13695	EGM63_RS04165	EGM64_RS05440	EGM60_RS02335	EGA31_RS17915
487	13	hypothetical protein	GCF_000007865	MAP_RS02530	0		MAP_RS02530	MAP4_RS16790	RC58_RS16755	RE97_RS16785	A0V42_RS02530	CEP84_RS01075	CEG92_RS02620	EC391_RS09035	EC390_RS13700	EGM63_RS04160	EGM64_RS05445	EGM60_RS02340	EGA31_RS17910
488	13	3-ketosteroid-9-alpha-hydroxylase reductase subunit	GCF_000007865	MAP_RS02535	0		MAP_RS02535	MAP4_RS16785	RC58_RS16750	RE97_RS16780	A0V42_RS02535	CEP84_RS01070	CEG92_RS02625	EC391_RS09030	EC390_RS13705	EGM63_RS04155	EGM64_RS05450	EGM60_RS02345	EGA31_RS17905
489	13	flavin-dependent monooxygenase	GCF_000007865	MAP_RS02540	0		MAP_RS02540	MAP4_RS16780	RC58_RS16745	RE97_RS16775	A0V42_RS02540	CEP84_RS01065	CEG92_RS02630	EC391_RS09025	EC390_RS13710	EGM63_RS04150	EGM64_RS05455	EGM60_RS02350	EGA31_RS17900
490	13	4,5-9,10-diseco-3-hydroxy-5,9, 17-trioxoandrosta-1(10),2-diene-4-oate hydrolase	GCF_000007865	MAP_RS02545	0		MAP_RS02545	MAP4_RS16775	RC58_RS16740	RE97_RS16770	A0V42_RS02545	CEP84_RS01060	CEG92_RS02635	EC391_RS09020	EC390_RS13715	EGM63_RS04145	EGM64_RS05460	EGM60_RS02355	EGA31_RS17895
491	13	iron-dependent extradiol dioxygenase	GCF_000007865	MAP_RS02550	0		MAP_RS02550	MAP4_RS16770	RC58_RS16735	RE97_RS16765	A0V42_RS02550	CEP84_RS01055	CEG92_RS02640	EC391_RS09015	EC390_RS13720	EGM63_RS04140	EGM64_RS05465	EGM60_RS02360	EGA31_RS17890
492	13	flavin reductase	GCF_000007865	MAP_RS02555	0		MAP_RS02555	MAP4_RS16765	RC58_RS16730	RE97_RS16760	A0V42_RS02555	CEP84_RS01050	CEG92_RS02645	EC391_RS09010	EC390_RS13725	EGM63_RS04135	EGM64_RS05470	EGM60_RS02365	EGA31_RS17885
493	13	arylamine N-acetyltransferase	GCF_000007865	MAP_RS02560	0		MAP_RS02560	MAP4_RS16760	RC58_RS16725	RE97_RS16755	A0V42_RS02560	CEP84_RS01045	CEG92_RS02650	EC391_RS09005	EC390_RS13730	EGM63_RS04130	EGM64_RS05475	EGM60_RS02370	EGA31_RS17880
494	13	pyridoxal phosphate-dependent aminotransferase	GCF_000007865	MAP_RS02565	0		MAP_RS02565	MAP4_RS16755	RC58_RS16720	RE97_RS16750	A0V42_RS02565	CEP84_RS01040	CEG92_RS02655	EC391_RS09000	EC390_RS13735	EGM63_RS04125	EGM64_RS05480	EGM60_RS02375	EGA31_RS17875
495	13	acyl-CoA dehydrogenase	GCF_000007865	MAP_RS02570	0		MAP_RS02570	MAP4_RS16750	RC58_RS16715	RE97_RS16745	A0V42_RS02570	CEP84_RS01035	CEG92_RS02660	EC391_RS08995	EC390_RS13740	EGM63_RS04120	EGM64_RS05485	EGM60_RS02380	EGA31_RS17870
496	13	acyl-CoA dehydrogenase	GCF_000007865	MAP_RS02575	0		MAP_RS02575	MAP4_RS16745	RC58_RS16710	RE97_RS16740	A0V42_RS02575	CEP84_RS01030	CEG92_RS02665	EC391_RS08990	EC390_RS13745	EGM63_RS04115	EGM64_RS05490	EGM60_RS02385	EGA31_RS17865
497	13	acyl-CoA dehydrogenase	GCF_000007865	MAP_RS02580	0		MAP_RS02580	MAP4_RS16740	RC58_RS16705	RE97_RS16735	A0V42_RS02580	CEP84_RS01025	CEG92_RS02670	EC391_RS08985	EC390_RS13750	EGM63_RS04110	EGM64_RS05495	EGM60_RS02390	EGA31_RS17860
498	13	acyl-CoA dehydrogenase	GCF_000007865	MAP_RS02590	0		MAP_RS02590	MAP4_RS16730	RC58_RS16695	RE97_RS16725	A0V42_RS02590	CEP84_RS01015	CEG92_RS02680	EC391_RS08975	EC390_RS13760	EGM63_RS04100	EGM64_RS05505	EGM60_RS02400	EGA31_RS17850
499	13	short chain dehydrogenase	GCF_000007865	MAP_RS02595	0		MAP_RS02595	MAP4_RS16725	RC58_RS16690	RE97_RS16720	A0V42_RS02595	CEP84_RS01010	CEG92_RS02685	EC391_RS08970	EC390_RS13765	EGM63_RS04095	EGM64_RS05510	EGM60_RS02405	EGA31_RS17845
500	13	TetR family transcriptional regulator	GCF_000007865	MAP_RS02600	0		MAP_RS02600	MAP4_RS16720	RC58_RS16685	RE97_RS16715	A0V42_RS02600	CEP84_RS01005	CEG92_RS02690	EC391_RS08965	EC390_RS13770	EGM63_RS04090	EGM64_RS05515	EGM60_RS02410	EGA31_RS17840
501	13	acetyl-CoA C-acyltransferase	GCF_000007865	MAP_RS02605	0		MAP_RS02605	MAP4_RS16715	RC58_RS16680	RE97_RS16710	A0V42_RS02605	CEP84_RS01000	CEG92_RS02695	EC391_RS08960	EC390_RS13775	EGM63_RS04085	EGM64_RS05520	EGM60_RS02415	EGA31_RS17835
502	13	hypothetical protein	GCF_000007865	MAP_RS02610	0		MAP_RS02610	MAP4_RS16710	RC58_RS16675	RE97_RS16705	A0V42_RS02610	CEP84_RS00995	CEG92_RS02700	EC391_RS08955	EC390_RS13780	EGM63_RS04080	EGM64_RS05525	EGM60_RS02420	EGA31_RS17830
503	13	hypothetical protein	GCF_000007865	MAP_RS02615	0		MAP_RS02615	MAP4_RS16705	RC58_RS16670	RE97_RS16700	A0V42_RS02615	CEP84_RS00990	CEG92_RS02705	EC391_RS08950	EC390_RS13785	EGM63_RS04075	EGM64_RS05530	EGM60_RS02425	EGA31_RS17825
504	13	2-nitropropane dioxygenase	GCF_000007865	MAP_RS02620	0		MAP_RS02620	MAP4_RS16700	RC58_RS16665	RE97_RS16695	A0V42_RS02620	CEP84_RS00985	CEG92_RS02710	EC391_RS08945	EC390_RS13790	EGM63_RS04070	EGM64_RS05535	EGM60_RS02430	EGA31_RS17820
505	13	CoA-transferase	GCF_000007865	MAP_RS02625	0		MAP_RS02625	MAP4_RS16695	RC58_RS16660	RE97_RS16690	A0V42_RS02625	CEP84_RS00980	CEG92_RS02715	EC391_RS08940	EC390_RS13795	EGM63_RS04065	EGM64_RS05540	EGM60_RS02435	EGA31_RS17815
506	13	CoA transferase subunit A	GCF_000007865	MAP_RS02630	0		MAP_RS02630	MAP4_RS16690	RC58_RS16655	RE97_RS16685	A0V42_RS02630	CEP84_RS00975	CEG92_RS02720	EC391_RS08935	EC390_RS13800	EGM63_RS04060	EGM64_RS05545	EGM60_RS02440	EGA31_RS17810
507	13	enoyl-CoA hydratase	GCF_000007865	MAP_RS02635	0		MAP_RS02635	MAP4_RS16685	RC58_RS16650	RE97_RS16680	A0V42_RS02635	CEP84_RS00970	CEG92_RS02725	EC391_RS08930	EC390_RS13805	EGM63_RS04055	EGM64_RS05550	EGM60_RS02445	EGA31_RS17805
508	13	short chain dehydrogenase	GCF_000007865	MAP_RS02640	0		MAP_RS02640	MAP4_RS16680	RC58_RS16645	RE97_RS16675	A0V42_RS02640	CEP84_RS00965	CEG92_RS02730	EC391_RS08925	EC390_RS13810	EGM63_RS04050	EGM64_RS05555	EGM60_RS02450	EGA31_RS17800
509	13	KR domain-containing protein	GCF_000007865	MAP_RS02645	0		MAP_RS02645	MAP4_RS16675	RC58_RS16640	RE97_RS16670	A0V42_RS02645	CEP84_RS00960	CEG92_RS02735	EC391_RS08920	EC390_RS13815	EGM63_RS04045	EGM64_RS05560	EGM60_RS02455	EGA31_RS17795
510	13	nitroreductase family deazaflavin-dependent oxidoreductase	GCF_000007865	MAP_RS02650	0		MAP_RS02650	MAP4_RS16670	RC58_RS16635	RE97_RS16665	A0V42_RS02650	CEP84_RS00955	CEG92_RS02740	EC391_RS08915	EC390_RS13820	EGM63_RS04040	EGM64_RS05565	EGM60_RS02460	EGA31_RS17790
511	13	hypothetical protein	GCF_000007865	MAP_RS02655	0		MAP_RS02655	MAP4_RS16665	RC58_RS16630	RE97_RS16660	A0V42_RS02655	CEP84_RS00950	CEG92_RS02745	EC391_RS08910	EC390_RS13825	EGM63_RS04035	EGM64_RS05570	EGM60_RS02465	EGA31_RS17785
512	13	acetyl-CoA C-acyltransferase	GCF_000007865	MAP_RS02660	0		MAP_RS02660	MAP4_RS16660	RC58_RS16625	RE97_RS16655	A0V42_RS02660	CEP84_RS00945	CEG92_RS02750	EC391_RS08905	EC390_RS13830	EGM63_RS04030	EGM64_RS05575	EGM60_RS02470	EGA31_RS17780
513	13	cytochrome P450	GCF_000007865	MAP_RS02665	0		MAP_RS02665	MAP4_RS16655	RC58_RS16620	RE97_RS16650	A0V42_RS02665	CEP84_RS00940	CEG92_RS02755	EC391_RS08900	EC390_RS13835	EGM63_RS04025	EGM64_RS05580	EGM60_RS02475	EGA31_RS17775
514	13	acyl-CoA dehydrogenase	GCF_000007865	MAP_RS02670	0		MAP_RS02670	MAP4_RS16650	RC58_RS16615	RE97_RS16645	A0V42_RS02670	CEP84_RS00935	CEG92_RS02760	EC391_RS08895	EC390_RS13840	EGM63_RS04020	EGM64_RS05585	EGM60_RS02480	EGA31_RS17770
515	13	acyl-CoA dehydrogenase	GCF_000007865	MAP_RS02675	0		MAP_RS02675	MAP4_RS16645	RC58_RS16610	RE97_RS16640	A0V42_RS02675	CEP84_RS00930	CEG92_RS02765	EC391_RS08890	EC390_RS13845	EGM63_RS04015	EGM64_RS05590	EGM60_RS02485	EGA31_RS17765
516	13	DNA-binding protein	GCF_000007865	MAP_RS02680	0		MAP_RS02680	MAP4_RS16640	RC58_RS16605	RE97_RS16635	A0V42_RS02680	CEP84_RS00925	CEG92_RS02770	EC391_RS08885	EC390_RS13850	EGM63_RS04010	EGM64_RS05595	EGM60_RS02490	EGA31_RS17760
517	13	hypothetical protein	GCF_000007865	MAP_RS02685	0		MAP_RS02685	MAP4_RS16635	RC58_RS16600	RE97_RS16630	A0V42_RS02685	CEP84_RS00920	CEG92_RS02775	EC391_RS08880	EC390_RS13855	EGM63_RS04005	EGM64_RS05600	EGM60_RS02495	EGA31_RS17755
518	13	acetyl-CoA acetyltransferase	GCF_000007865	MAP_RS02690	0		MAP_RS02690	MAP4_RS16630	RC58_RS16595	RE97_RS16625	A0V42_RS02690	CEP84_RS00915	CEG92_RS02780	EC391_RS08875	EC390_RS13860	EGM63_RS04000	EGM64_RS05605	EGM60_RS02500	EGA31_RS17750
519	13	hypothetical protein	GCF_000007865	MAP_RS02695	0		MAP_RS02695	MAP4_RS16625	RC58_RS16590	RE97_RS16620	A0V42_RS02695	CEP84_RS00910	CEG92_RS02785	EC391_RS08870	EC390_RS13865	EGM63_RS03995	EGM64_RS05610	EGM60_RS02505	EGA31_RS17745
520	13	3-alpha,7-alpha, 12-alpha-trihydroxy-5-beta-cholest-24-enoyl-CoA hydratase	GCF_000007865	MAP_RS02700	0		MAP_RS02700	MAP4_RS16620	RC58_RS16585	RE97_RS16615	A0V42_RS02700	CEP84_RS00905	CEG92_RS02790	EC391_RS08865	EC390_RS13870	EGM63_RS03990	EGM64_RS05615	EGM60_RS02510	EGA31_RS17740
521	13	FAD-binding protein	GCF_000007865	MAP_RS02705	0		MAP_RS02705	MAP4_RS16615	RC58_RS16580	RE97_RS16610	A0V42_RS02705	CEP84_RS00900	CEG92_RS02795	EC391_RS08860	EC390_RS13875	EGM63_RS03985	EGM64_RS05620	EGM60_RS02515	EGA31_RS17735
522	13	2-keto-4-pentenoate hydratase	GCF_000007865	MAP_RS02710	0		MAP_RS02710	MAP4_RS16610	RC58_RS16575	RE97_RS16605	A0V42_RS02710	CEP84_RS00895	CEG92_RS02800	EC391_RS08855	EC390_RS13880	EGM63_RS03980	EGM64_RS05625	EGM60_RS02520	EGA31_RS17730
523	13	acetaldehyde dehydrogenase	GCF_000007865	MAP_RS02715	0		MAP_RS02715	MAP4_RS16605	RC58_RS16570	RE97_RS16600	A0V42_RS02715	CEP84_RS00890	CEG92_RS02805	EC391_RS08850	EC390_RS13885	EGM63_RS03975	EGM64_RS05630	EGM60_RS02525	EGA31_RS17725
524	13	4-hydroxy-2-oxovalerate aldolase	GCF_000007865	MAP_RS02720	0		MAP_RS02720	MAP4_RS16600	RC58_RS16565	RE97_RS16595	A0V42_RS02720	CEP84_RS00885	CEG92_RS02810	EC391_RS08845	EC390_RS13890	EGM63_RS03970	EGM64_RS05635	EGM60_RS02530	EGA31_RS17720
526	13	hypothetical protein	GCF_000007865	MAP_RS02730	0		MAP_RS02730	MAP4_RS16590	RC58_RS16555	RE97_RS16585	A0V42_RS02730	CEP84_RS00875	CEG92_RS02820	EC391_RS08835	EC390_RS13900	EGM63_RS03960	EGM64_RS05645	EGM60_RS02540	EGA31_RS17710
527	13	KR domain-containing protein	GCF_000007865	MAP_RS02735	0		MAP_RS02735	MAP4_RS16585	RC58_RS16550	RE97_RS16580	A0V42_RS02735	CEP84_RS00870	CEG92_RS02825	EC391_RS08830	EC390_RS13905	EGM63_RS03955	EGM64_RS05650	EGM60_RS02545	EGA31_RS17705
528	13	sulfotransferase	GCF_000007865	MAP_RS02740	0		MAP_RS02740	MAP4_RS16580	RC58_RS16545	RE97_RS16575	A0V42_RS02740	CEP84_RS00865	CEG92_RS02830	EC391_RS08825	EC390_RS13910	EGM63_RS03950	EGM64_RS05655	EGM60_RS02550	EGA31_RS17700
530	13	3-ketosteroid-9-alpha-hydroxylase subunit A	GCF_000007865	MAP_RS02750	0		MAP_RS02750	MAP4_RS16570	RC58_RS16535	RE97_RS16565	A0V42_RS02750	CEP84_RS00855	CEG92_RS02840	EC391_RS08815	EC390_RS13920	EGM63_RS03940	EGM64_RS05665	EGM60_RS02560	EGA31_RS17690
531	13	gamma carbonic anhydrase family protein	GCF_000007865	MAP_RS02755	0		MAP_RS02755	MAP4_RS16565	RC58_RS16530	RE97_RS16560	A0V42_RS02755	CEP84_RS00850	CEG92_RS02845	EC391_RS08810	EC390_RS13925	EGM63_RS03935	EGM64_RS05670	EGM60_RS02565	EGA31_RS17685
532	13	ketosteroid isomerase	GCF_000007865	MAP_RS02760	0		MAP_RS02760	MAP4_RS16560	RC58_RS16525	RE97_RS16555	A0V42_RS02760	CEP84_RS00845	CEG92_RS02850	EC391_RS08805	EC390_RS13930	EGM63_RS03930	EGM64_RS05675	EGM60_RS02570	EGA31_RS17680
533	13	acetyl-CoA acetyltransferase	GCF_000007865	MAP_RS02765	0		MAP_RS02765	MAP4_RS16555	RC58_RS16520	RE97_RS16550	A0V42_RS02765	CEP84_RS00840	CEG92_RS02855	EC391_RS08800	EC390_RS13935	EGM63_RS03925	EGM64_RS05680	EGM60_RS02575	EGA31_RS17675
534	13	acetyl-CoA acetyltransferase	GCF_000007865	MAP_RS02770	0		MAP_RS02770	MAP4_RS16550	RC58_RS16515	RE97_RS16545	A0V42_RS02770	CEP84_RS00835	CEG92_RS02860	EC391_RS08795	EC390_RS13940	EGM63_RS03920	EGM64_RS05685	EGM60_RS02580	EGA31_RS17670
535	13	hypothetical protein	GCF_000007865	MAP_RS02775	0		MAP_RS02775	MAP4_RS16545	RC58_RS16510	RE97_RS16540	A0V42_RS02775	CEP84_RS00830	CEG92_RS02865	EC391_RS08790	EC390_RS13945	EGM63_RS03915	EGM64_RS05690	EGM60_RS02585	EGA31_RS17665
536	13	LLM class F420-dependent oxidoreductase	GCF_000007865	MAP_RS02780	0		MAP_RS02780	MAP4_RS16540	RC58_RS16505	RE97_RS16535	A0V42_RS02780	CEP84_RS00825	CEG92_RS02870	EC391_RS08785	EC390_RS13950	EGM63_RS03910	EGM64_RS05695	EGM60_RS02590	EGA31_RS17660
537	13	acetoacetate decarboxylase	GCF_000007865	MAP_RS02785	0		MAP_RS02785	MAP4_RS16535	RC58_RS16500	RE97_RS16530	A0V42_RS02785	CEP84_RS00820	CEG92_RS02875	EC391_RS08780	EC390_RS13955	EGM63_RS03905	EGM64_RS05700	EGM60_RS02595	EGA31_RS17655
538	13	cytochrome P450	GCF_000007865	MAP_RS02790	0		MAP_RS02790	MAP4_RS16530	RC58_RS16495	RE97_RS16525	A0V42_RS02790	CEP84_RS00815	CEG92_RS02880	EC391_RS08775	EC390_RS13960	EGM63_RS03900	EGM64_RS05705	EGM60_RS02600	EGA31_RS17650
539	13	DUF559 domain-containing protein	GCF_000007865	MAP_RS02795	0		MAP_RS02795	MAP4_RS16525	RC58_RS16490	RE97_RS16520	A0V42_RS02795	CEP84_RS00810	CEG92_RS02885	EC391_RS08770	EC390_RS13965	EGM63_RS03895	EGM64_RS05710	EGM60_RS02605	EGA31_RS17645
540	13	enoyl-CoA hydratase	GCF_000007865	MAP_RS02800	0		MAP_RS02800	MAP4_RS16520	RC58_RS16485	RE97_RS16515	A0V42_RS02800	CEP84_RS00805	CEG92_RS02890	EC391_RS08765	EC390_RS13970	EGM63_RS03890	EGM64_RS05715	EGM60_RS02610	EGA31_RS17640
542	13	fructosamine kinase	GCF_000007865	MAP_RS02810	0		MAP_RS02810	MAP4_RS16510	RC58_RS16475	RE97_RS16505	A0V42_RS02810	CEP84_RS00795	CEG92_RS02900	EC391_RS08755	EC390_RS13980	EGM63_RS03880	EGM64_RS05725	EGM60_RS02620	EGA31_RS17630
543	13	amidohydrolase	GCF_000007865	MAP_RS02815	0		MAP_RS02815	MAP4_RS16505	RC58_RS16470	RE97_RS16500	A0V42_RS02815	CEP84_RS00790	CEG92_RS02905	EC391_RS08750	EC390_RS13985	EGM63_RS03875	EGM64_RS05730	EGM60_RS02625	EGA31_RS17625
548	13	acyl-CoA synthetase	GCF_000007865	MAP_RS02835	0		MAP_RS02835	MAP4_RS16485	RC58_RS16445	RE97_RS16480	A0V42_RS02840	CEP84_RS00770	CEG92_RS02930	EC391_RS08730	EC390_RS14005	EGM63_RS03855	EGM64_RS05750	EGM60_RS02645	EGA31_RS17605
549	13	acyl-CoA dehydrogenase	GCF_000007865	MAP_RS02845	0		MAP_RS02845	MAP4_RS16475	RC58_RS16435	RE97_RS16470	A0V42_RS02850	CEP84_RS00760	CEG92_RS02940	EC391_RS08720	EC390_RS14015	EGM63_RS03845	EGM64_RS05760	EGM60_RS02655	EGA31_RS17595
550	13	ferredoxin	GCF_000007865	MAP_RS02850	0		MAP_RS02850	MAP4_RS16470	RC58_RS16430	RE97_RS16465	A0V42_RS02855	CEP84_RS00755	CEG92_RS02945	EC391_RS08715	EC390_RS14020	EGM63_RS03840	EGM64_RS05765	EGM60_RS02660	EGA31_RS17590
551	13	3-oxoacyl-ACP reductase	GCF_000007865	MAP_RS02855	0		MAP_RS02855	MAP4_RS16465	RC58_RS16425	RE97_RS16460	A0V42_RS02860	CEP84_RS00750	CEG92_RS02950	EC391_RS08710	EC390_RS14025	EGM63_RS03835	EGM64_RS05770	EGM60_RS02665	EGA31_RS17585
552	13	ABC transporter permease	GCF_000007865	MAP_RS02860	0		MAP_RS02860	MAP4_RS16460	RC58_RS16420	RE97_RS16455	A0V42_RS02865	CEP84_RS00745	CEG92_RS02955	EC391_RS08705	EC390_RS14030	EGM63_RS03830	EGM64_RS05775	EGM60_RS02670	EGA31_RS17580
553	13	ABC transporter permease	GCF_000007865	MAP_RS02865	0		MAP_RS02865	MAP4_RS16455	RC58_RS16415	RE97_RS16450	A0V42_RS02870	CEP84_RS00740	CEG92_RS02960	EC391_RS08700	EC390_RS14035	EGM63_RS03825	EGM64_RS05780	EGM60_RS02675	EGA31_RS17575
554	13	virulence factor Mce family protein	GCF_000007865	MAP_RS02870	0		MAP_RS02870	MAP4_RS16450	RC58_RS16410	RE97_RS16445	A0V42_RS02875	CEP84_RS00735	CEG92_RS02965	EC391_RS08695	EC390_RS14040	EGM63_RS03820	EGM64_RS05785	EGM60_RS02680	EGA31_RS17570
555	13	virulence factor Mce family protein	GCF_000007865	MAP_RS02875	0		MAP_RS02875	MAP4_RS16445	RC58_RS16405	RE97_RS16440	A0V42_RS02880	CEP84_RS00730	CEG92_RS02970	EC391_RS08690	EC390_RS14045	EGM63_RS03815	EGM64_RS05790	EGM60_RS02685	EGA31_RS17565
556	13	virulence factor Mce family protein	GCF_000007865	MAP_RS02880	0		MAP_RS02880	MAP4_RS16440	RC58_RS16400	RE97_RS16435	A0V42_RS02885	CEP84_RS00725	CEG92_RS02975	EC391_RS08685	EC390_RS14050	EGM63_RS03810	EGM64_RS05795	EGM60_RS02690	EGA31_RS17560
558	13	MCE family protein	GCF_000007865	MAP_RS02890	0		MAP_RS02890	MAP4_RS16430	RC58_RS16390	RE97_RS16425	A0V42_RS02895	CEP84_RS00715	CEG92_RS02985	EC391_RS08675	EC390_RS14060	EGM63_RS03800	EGM64_RS05805	EGM60_RS02700	EGA31_RS17550
559	13	hypothetical protein	GCF_000007865	MAP_RS02900	0		MAP_RS02900	MAP4_RS16420	RC58_RS16380	RE97_RS16415	A0V42_RS02905	CEP84_RS00705	CEG92_RS02995	EC391_RS08665	EC390_RS14070	EGM63_RS03790	EGM64_RS05815	EGM60_RS02710	EGA31_RS17540
560	13	hypothetical protein	GCF_000007865	MAP_RS02905	0		MAP_RS02905	MAP4_RS16415	RC58_RS16375	RE97_RS16410	A0V42_RS02910	CEP84_RS00700	CEG92_RS03000	EC391_RS08660	EC390_RS14075	EGM63_RS03785	EGM64_RS05820	EGM60_RS02715	EGA31_RS17535
561	13	hypothetical protein	GCF_000007865	MAP_RS02910	0		MAP_RS02910	MAP4_RS16410	RC58_RS16370	RE97_RS16405	A0V42_RS02915	CEP84_RS00695	CEG92_RS03005	EC391_RS08655	EC390_RS14080	EGM63_RS03780	EGM64_RS05825	EGM60_RS02720	EGA31_RS17530
562	13	trehalose-6-phosphate synthase	GCF_000007865	MAP_RS02915	0		MAP_RS02915	MAP4_RS16405	RC58_RS16365	RE97_RS16400	A0V42_RS02920	CEP84_RS00690	CEG92_RS03010	EC391_RS08650	EC390_RS14085	EGM63_RS03775	EGM64_RS05830	EGM60_RS02725	EGA31_RS17525
564	13	phosphate ABC transporter ATP-binding protein	GCF_000007865	MAP_RS02920	0		MAP_RS02920	MAP4_RS16400	RC58_RS16360	RE97_RS16395	A0V42_RS02925	CEP84_RS00680	CEG92_RS03020	EC391_RS08640	EC390_RS14095	EGM63_RS03765	EGM64_RS05840	EGM60_RS02735	EGA31_RS17515
565	13	iron export ABC transporter permease subunit FetB	GCF_000007865	MAP_RS02925	0		MAP_RS02925	MAP4_RS16395	RC58_RS16355	RE97_RS16390	A0V42_RS02930	CEP84_RS00675	CEG92_RS03025	EC391_RS08635	EC390_RS14100	EGM63_RS03760	EGM64_RS05845	EGM60_RS02740	EGA31_RS17510
566	13	enoyl-CoA hydratase	GCF_000007865	MAP_RS02930	0		MAP_RS02930	MAP4_RS16390	RC58_RS16350	RE97_RS16385	A0V42_RS02935	CEP84_RS00670	CEG92_RS03030	EC391_RS08630	EC390_RS14105	EGM63_RS03755	EGM64_RS05850	EGM60_RS02745	EGA31_RS17505
567	13	KR domain-containing protein	GCF_000007865	MAP_RS02935	0		MAP_RS02935	MAP4_RS16385	RC58_RS16345	RE97_RS16380	A0V42_RS02940	CEP84_RS00665	CEG92_RS03035	EC391_RS08625	EC390_RS14110	EGM63_RS03750	EGM64_RS05855	EGM60_RS02750	EGA31_RS17500
569	13	hypothetical protein	GCF_000007865	MAP_RS02945	0		MAP_RS02945	MAP4_RS16375	RC58_RS16335	RE97_RS16370	A0V42_RS02950	CEP84_RS00655	CEG92_RS03045	EC391_RS08615	EC390_RS14120	EGM63_RS03740	EGM64_RS05865	EGM60_RS02760	EGA31_RS17490
570	13	hypothetical protein	GCF_000007865	MAP_RS02950	0		MAP_RS02950	MAP4_RS16370	RC58_RS16330	RE97_RS16365	A0V42_RS02955	CEP84_RS00650	CEG92_RS03050	EC391_RS08610	EC390_RS14125	EGM63_RS03735	EGM64_RS05870	EGM60_RS02765	EGA31_RS17485
571	13	amidase	GCF_000007865	MAP_RS02955	0		MAP_RS02955	MAP4_RS16365	RC58_RS16325	RE97_RS16360	A0V42_RS02960	CEP84_RS00645	CEG92_RS03055	EC391_RS08605	EC390_RS14130	EGM63_RS03730	EGM64_RS05875	EGM60_RS02770	EGA31_RS17480
572	13	alpha/beta hydrolase	GCF_000007865	MAP_RS02960	0		MAP_RS02960	MAP4_RS16360	RC58_RS16320	RE97_RS16355	A0V42_RS02965	CEP84_RS00640	CEG92_RS03060	EC391_RS08600	EC390_RS14135	EGM63_RS03725	EGM64_RS05880	EGM60_RS02775	EGA31_RS17475
573	13	hypothetical protein	GCF_000007865	MAP_RS02965	0		MAP_RS02965	MAP4_RS16355	RC58_RS16315	RE97_RS16350	A0V42_RS02970	CEP84_RS00635	CEG92_RS03065	EC391_RS08595	EC390_RS14140	EGM63_RS03720	EGM64_RS05885	EGM60_RS02780	EGA31_RS17470
574	13	hypothetical protein	GCF_000007865	MAP_RS02970	0		MAP_RS02970	MAP4_RS16350	RC58_RS16310	RE97_RS16345	A0V42_RS02975	CEP84_RS00630	CEG92_RS03070	EC391_RS08590	EC390_RS14145	EGM63_RS03715	EGM64_RS05890	EGM60_RS02785	EGA31_RS17465
575	13	hypothetical protein	GCF_000007865	MAP_RS02975	0		MAP_RS02975	MAP4_RS16345	RC58_RS16305	RE97_RS16340	A0V42_RS02980	CEP84_RS00625	CEG92_RS03075	EC391_RS08585	EC390_RS14150	EGM63_RS03710	EGM64_RS05895	EGM60_RS02790	EGA31_RS17460
576	13	lytic transglycosylase	GCF_000007865	MAP_RS02980	0		MAP_RS02980	MAP4_RS16340	RC58_RS16300	RE97_RS16335	A0V42_RS02985	CEP84_RS00620	CEG92_RS03080	EC391_RS08580	EC390_RS14155	EGM63_RS03705	EGM64_RS05900	EGM60_RS02795	EGA31_RS17455
577	13	DUF732 domain-containing protein	GCF_000007865	MAP_RS02985	0		MAP_RS02985	MAP4_RS16335	RC58_RS16295	RE97_RS16330	A0V42_RS02990	CEP84_RS00615	CEG92_RS03085	EC391_RS08575	EC390_RS14160	EGM63_RS03700	EGM64_RS05905	EGM60_RS02800	EGA31_RS17450
578	13	hypothetical protein	GCF_000007865	MAP_RS02990	0		MAP_RS02990	MAP4_RS16330	RC58_RS16290	RE97_RS16325	A0V42_RS02995	CEP84_RS00610	CEG92_RS03090	EC391_RS08570	EC390_RS14165	EGM63_RS03695	EGM64_RS05910	EGM60_RS02805	EGA31_RS17445
581	13	DNA-binding response regulator	GCF_000007865	MAP_RS03010	0		MAP_RS03010	MAP4_RS16310	RC58_RS16275	RE97_RS16305	A0V42_RS03015	CEP84_RS00590	CEG92_RS03110	EC391_RS08550	EC390_RS14185	EGM63_RS03675	EGM64_RS05930	EGM60_RS02825	EGA31_RS17425
582	13	sensor histidine kinase	GCF_000007865	MAP_RS03015	0		MAP_RS03015	MAP4_RS16305	RC58_RS16270	RE97_RS16300	A0V42_RS03020	CEP84_RS00585	CEG92_RS03115	EC391_RS08545	EC390_RS14190	EGM63_RS03670	EGM64_RS05935	EGM60_RS02830	EGA31_RS17420
583	13	HIT family protein	GCF_000007865	MAP_RS03020	0		MAP_RS03020	MAP4_RS16300	RC58_RS16265	RE97_RS16295	A0V42_RS03025	CEP84_RS00580	CEG92_RS03120	EC391_RS08540	EC390_RS14195	EGM63_RS03665	EGM64_RS05940	EGM60_RS02835	EGA31_RS17415
584	13	hypothetical protein	GCF_000007865	MAP_RS03025	0		MAP_RS03025	MAP4_RS16295	RC58_RS16260	RE97_RS16290	A0V42_RS03030	CEP84_RS00575	CEG92_RS03125	EC391_RS08535	EC390_RS14200	EGM63_RS03660	EGM64_RS05945	EGM60_RS02840	EGA31_RS17410
585	13	NDMA-dependent alcohol dehydrogenase	GCF_000007865	MAP_RS03030	0		MAP_RS03030	MAP4_RS16290	RC58_RS16255	RE97_RS16285	A0V42_RS03035	CEP84_RS00570	CEG92_RS03130	EC391_RS08530	EC390_RS14205	EGM63_RS03655	EGM64_RS05950	EGM60_RS02845	EGA31_RS17405
587	13	ferredoxin	GCF_000007865	MAP_RS03040	0		MAP_RS03040	MAP4_RS16280	RC58_RS16245	RE97_RS16275	A0V42_RS03045	CEP84_RS00560	CEG92_RS03140	EC391_RS08520	EC390_RS14215	EGM63_RS03645	EGM64_RS05960	EGM60_RS02855	EGA31_RS17395
588	13	cytochrome P450	GCF_000007865	MAP_RS03045	0		MAP_RS03045	MAP4_RS16275	RC58_RS16240	RE97_RS16270	A0V42_RS03050	CEP84_RS00555	CEG92_RS03145	EC391_RS08515	EC390_RS14220	EGM63_RS03640	EGM64_RS05965	EGM60_RS02860	EGA31_RS17390
589	13	NAD(P)-dependent oxidoreductase	GCF_000007865	MAP_RS03050	0		MAP_RS03050	MAP4_RS16270	RC58_RS16235	RE97_RS16265	A0V42_RS03055	CEP84_RS00550	CEG92_RS03150	EC391_RS08510	EC390_RS14225	EGM63_RS03635	EGM64_RS05970	EGM60_RS02865	EGA31_RS17385
591	13	TetR/AcrR family transcriptional regulator	GCF_000007865	MAP_RS03060	0		MAP_RS03060	MAP4_RS16260	RC58_RS16225	RE97_RS16255	A0V42_RS03065	CEP84_RS00540	CEG92_RS03160	EC391_RS08500	EC390_RS14235	EGM63_RS03625	EGM64_RS05980	EGM60_RS02875	EGA31_RS17375
592	13	aldehyde dehydrogenase	GCF_000007865	MAP_RS03065	0		MAP_RS03065	MAP4_RS16255	RC58_RS16220	RE97_RS16250	A0V42_RS03070	CEP84_RS00535	CEG92_RS03165	EC391_RS08495	EC390_RS14240	EGM63_RS03620	EGM64_RS05985	EGM60_RS02880	EGA31_RS17370
593	13	3-oxoacyl-ACP reductase	GCF_000007865	MAP_RS03070	0		MAP_RS03070	MAP4_RS16250	RC58_RS16215	RE97_RS16245	A0V42_RS03075	CEP84_RS00530	CEG92_RS03170	EC391_RS08490	EC390_RS14245	EGM63_RS03615	EGM64_RS05990	EGM60_RS02885	EGA31_RS17365
594	13	NAD(P)-dependent oxidoreductase	GCF_000007865	MAP_RS03075	0		MAP_RS03075	MAP4_RS16245	RC58_RS16210	RE97_RS16240	A0V42_RS03080	CEP84_RS00525	CEG92_RS03175	EC391_RS08485	EC390_RS14250	EGM63_RS03610	EGM64_RS05995	EGM60_RS02890	EGA31_RS17360
595	13	carboxymuconolactone decarboxylase family protein	GCF_000007865	MAP_RS03080	0		MAP_RS03080	MAP4_RS16240	RC58_RS16205	RE97_RS16235	A0V42_RS03085	CEP84_RS00520	CEG92_RS03180	EC391_RS08480	EC390_RS14255	EGM63_RS03605	EGM64_RS06000	EGM60_RS02895	EGA31_RS17355
596	13	phosphoribosylamine--glycine ligase	GCF_000007865	MAP_RS03085	0		MAP_RS03085	MAP4_RS16235	RC58_RS16200	RE97_RS16230	A0V42_RS03090	CEP84_RS00515	CEG92_RS03185	EC391_RS08475	EC390_RS14260	EGM63_RS03600	EGM64_RS06005	EGM60_RS02900	EGA31_RS17350
597	13	gamma-glutamyltransferase family protein	GCF_000007865	MAP_RS03090	0		MAP_RS03090	MAP4_RS16230	RC58_RS16195	RE97_RS16225	A0V42_RS03095	CEP84_RS00510	CEG92_RS03190	EC391_RS08470	EC390_RS14265	EGM63_RS03595	EGM64_RS06010	EGM60_RS02905	EGA31_RS17345
598	13	hypothetical protein	GCF_000007865	MAP_RS03095	0		MAP_RS03095	MAP4_RS16225	RC58_RS16190	RE97_RS16220	A0V42_RS03100	CEP84_RS00505	CEG92_RS03195	EC391_RS08465	EC390_RS14270	EGM63_RS03590	EGM64_RS06015	EGM60_RS02910	EGA31_RS17340
599	13	TetR family transcriptional regulator	GCF_000007865	MAP_RS03100	0		MAP_RS03100	MAP4_RS16220	RC58_RS16185	RE97_RS16215	A0V42_RS03105	CEP84_RS00500	CEG92_RS03200	EC391_RS08460	EC390_RS14275	EGM63_RS03585	EGM64_RS06020	EGM60_RS02915	EGA31_RS17335
600	13	DUF429 domain-containing protein	GCF_000007865	MAP_RS03105	0		MAP_RS03105	MAP4_RS16215	RC58_RS16180	RE97_RS16210	A0V42_RS03110	CEP84_RS00495	CEG92_RS03205	EC391_RS08455	EC390_RS14280	EGM63_RS03580	EGM64_RS06025	EGM60_RS02920	EGA31_RS17330
601	13	adenylosuccinate lyase	GCF_000007865	MAP_RS03110	0		MAP_RS03110	MAP4_RS16210	RC58_RS16175	RE97_RS16205	A0V42_RS03115	CEP84_RS00490	CEG92_RS03210	EC391_RS08450	EC390_RS14285	EGM63_RS03575	EGM64_RS06030	EGM60_RS02925	EGA31_RS17325
602	13	cytochrome P450	GCF_000007865	MAP_RS03115	0		MAP_RS03115	MAP4_RS16205	RC58_RS16170	RE97_RS16200	A0V42_RS03120	CEP84_RS00485	CEG92_RS03215	EC391_RS08445	EC390_RS14290	EGM63_RS03570	EGM64_RS06035	EGM60_RS02930	EGA31_RS17320
603	13	hypothetical protein	GCF_000007865	MAP_RS03120	0		MAP_RS03120	MAP4_RS16200	RC58_RS16165	RE97_RS16195	A0V42_RS03125	CEP84_RS00480	CEG92_RS03220	EC391_RS08440	EC390_RS14295	EGM63_RS03565	EGM64_RS06040	EGM60_RS02935	EGA31_RS17315
604	13	phosphoribosylaminoimidazolesuccinocarboxamide synthase	GCF_000007865	MAP_RS03125	0		MAP_RS03125	MAP4_RS16195	RC58_RS16160	RE97_RS16190	A0V42_RS03130	CEP84_RS00475	CEG92_RS03225	EC391_RS08435	EC390_RS14300	EGM63_RS03560	EGM64_RS06045	EGM60_RS02940	EGA31_RS17310
606	13	membrane protein	GCF_000007865	MAP_RS03135	0		MAP_RS03135	MAP4_RS16185	RC58_RS16150	RE97_RS16180	A0V42_RS03140	CEP84_RS00465	CEG92_RS03235	EC391_RS08425	EC390_RS14310	EGM63_RS03550	EGM64_RS06055	EGM60_RS02950	EGA31_RS17300
607	13	TetR family transcriptional regulator	GCF_000007865	MAP_RS03140	0		MAP_RS03140	MAP4_RS16180	RC58_RS16145	RE97_RS16175	A0V42_RS03145	CEP84_RS00460	CEG92_RS03240	EC391_RS08420	EC390_RS14315	EGM63_RS03545	EGM64_RS06060	EGM60_RS02955	EGA31_RS17295
608	13	MFS transporter	GCF_000390085	MAP4_RS16175	0		MAP_RS03145	MAP4_RS16175	RC58_RS16140	RE97_RS16170	A0V42_RS03150	CEP84_RS00455	CEG92_RS03245	EC391_RS08415	EC390_RS14320	EGM63_RS03540	EGM64_RS06065	EGM60_RS02960	EGA31_RS17290
609	13	MFS transporter	GCF_000007865	MAP_RS03150	0		MAP_RS03150	MAP4_RS16170	RC58_RS16135	RE97_RS16165	A0V42_RS03155	CEP84_RS00450	CEG92_RS03250	EC391_RS08410	EC390_RS14325	EGM63_RS03535	EGM64_RS06070	EGM60_RS02965	EGA31_RS17285
610	13	DUF2334 domain-containing protein	GCF_000007865	MAP_RS03155	0		MAP_RS03155	MAP4_RS16165	RC58_RS16130	RE97_RS16160	A0V42_RS03160	CEP84_RS00445	CEG92_RS03255	EC391_RS08405	EC390_RS14330	EGM63_RS03530	EGM64_RS06075	EGM60_RS02970	EGA31_RS17280
611	13	FAD-binding dehydrogenase	GCF_000007865	MAP_RS03160	0		MAP_RS03160	MAP4_RS16160	RC58_RS16125	RE97_RS16155	A0V42_RS03165	CEP84_RS00440	CEG92_RS03260	EC391_RS08400	EC390_RS14335	EGM63_RS03525	EGM64_RS06080	EGM60_RS02975	EGA31_RS17275
612	13	MBL fold hydrolase	GCF_000007865	MAP_RS03165	0		MAP_RS03165	MAP4_RS16155	RC58_RS16120	RE97_RS16150	A0V42_RS03170	CEP84_RS00435	CEG92_RS03265	EC391_RS08395	EC390_RS14340	EGM63_RS03520	EGM64_RS06085	EGM60_RS02980	EGA31_RS17270
614	13	phosphoribosylformylglycinamidine synthase subunit PurS	GCF_000007865	MAP_RS03175	0		MAP_RS03175	MAP4_RS16145	RC58_RS16110	RE97_RS16140	A0V42_RS03180	CEP84_RS00425	CEG92_RS03275	EC391_RS08385	EC390_RS14350	EGM63_RS03510	EGM64_RS06095	EGM60_RS02990	EGA31_RS17260
615	13	phosphoribosylformylglycinamidine synthase subunit PurQ	GCF_000007865	MAP_RS03180	0		MAP_RS03180	MAP4_RS16140	RC58_RS16105	RE97_RS16135	A0V42_RS03185	CEP84_RS00420	CEG92_RS03280	EC391_RS08380	EC390_RS14355	EGM63_RS03505	EGM64_RS06100	EGM60_RS02995	EGA31_RS17255
616	13	hypothetical protein	GCF_000007865	MAP_RS03185	0		MAP_RS03185	MAP4_RS16135	RC58_RS16100	RE97_RS16130	A0V42_RS03190	CEP84_RS00415	CEG92_RS03285	EC391_RS08375	EC390_RS14360	EGM63_RS03500	EGM64_RS06105	EGM60_RS03000	EGA31_RS17250
617	13	GntR family transcriptional regulator	GCF_000007865	MAP_RS03190	0		MAP_RS03190	MAP4_RS16130	RC58_RS16095	RE97_RS16125	A0V42_RS03195	CEP84_RS00410	CEG92_RS03290	EC391_RS08370	EC390_RS14365	EGM63_RS03495	EGM64_RS06110	EGM60_RS03005	EGA31_RS17245
618	13	cupin domain-containing protein	GCF_000007865	MAP_RS03195	0		MAP_RS03195	MAP4_RS16125	RC58_RS16090	RE97_RS16120	A0V42_RS03200	CEP84_RS00405	CEG92_RS03295	EC391_RS08365	EC390_RS14370	EGM63_RS03490	EGM64_RS06115	EGM60_RS03010	EGA31_RS17240
619	13	bacteriocin	GCF_000007865	MAP_RS03200	0		MAP_RS03200	MAP4_RS16120	RC58_RS16085	RE97_RS16115	A0V42_RS03205	CEP84_RS00400	CEG92_RS03300	EC391_RS08360	EC390_RS14375	EGM63_RS03485	EGM64_RS06120	EGM60_RS03015	EGA31_RS17235
620	13	peroxidase	GCF_000007865	MAP_RS03205	0		MAP_RS03205	MAP4_RS16115	RC58_RS16080	RE97_RS16110	A0V42_RS03210	CEP84_RS00395	CEG92_RS03305	EC391_RS08355	EC390_RS14380	EGM63_RS03480	EGM64_RS06125	EGM60_RS03020	EGA31_RS17230
621	13	M18 family aminopeptidase	GCF_000007865	MAP_RS03210	0		MAP_RS03210	MAP4_RS16110	RC58_RS16075	RE97_RS16105	A0V42_RS03215	CEP84_RS00390	CEG92_RS03310	EC391_RS08350	EC390_RS14385	EGM63_RS03475	EGM64_RS06130	EGM60_RS03025	EGA31_RS17225
622	13	VOC family protein	GCF_000007865	MAP_RS03215	0		MAP_RS03215	MAP4_RS16105	RC58_RS16070	RE97_RS16100	A0V42_RS03220	CEP84_RS00385	CEG92_RS03315	EC391_RS08345	EC390_RS14390	EGM63_RS03470	EGM64_RS06135	EGM60_RS03030	EGA31_RS17220
623	13	hypothetical protein	GCF_000007865	MAP_RS03220	0		MAP_RS03220	MAP4_RS16100	RC58_RS16065	RE97_RS16095	A0V42_RS03225	CEP84_RS00380	CEG92_RS03320	EC391_RS08340	EC390_RS14395	EGM63_RS03465	EGM64_RS06140	EGM60_RS03035	EGA31_RS17215
624	13	phosphoribosylformylglycinamidine synthase subunit PurL	GCF_000007865	MAP_RS03225	0		MAP_RS03225	MAP4_RS16095	RC58_RS16060	RE97_RS16090	A0V42_RS03230	CEP84_RS00375	CEG92_RS03325	EC391_RS08335	EC390_RS14400	EGM63_RS03460	EGM64_RS06145	EGM60_RS03040	EGA31_RS17210
625	13	CPBP family intramembrane metalloprotease	GCF_000007865	MAP_RS03230	0		MAP_RS03230	MAP4_RS16090	RC58_RS16055	RE97_RS16085	A0V42_RS03235	CEP84_RS00370	CEG92_RS03330	EC391_RS08330	EC390_RS14405	EGM63_RS03455	EGM64_RS06150	EGM60_RS03045	EGA31_RS17205
626	13	hypothetical protein	GCF_000007865	MAP_RS03235	0		MAP_RS03235	MAP4_RS16085	RC58_RS16050	RE97_RS16080	A0V42_RS03240	CEP84_RS00365	CEG92_RS03335	EC391_RS08325	EC390_RS14410	EGM63_RS03450	EGM64_RS06155	EGM60_RS03050	EGA31_RS17200
627	13	amidophosphoribosyltransferase	GCF_000007865	MAP_RS03240	0		MAP_RS03240	MAP4_RS16080	RC58_RS16045	RE97_RS16075	A0V42_RS03245	CEP84_RS00360	CEG92_RS03340	EC391_RS08320	EC390_RS14415	EGM63_RS03445	EGM64_RS06160	EGM60_RS03055	EGA31_RS17195
628	13	phosphoribosylformylglycinamidine cyclo-ligase	GCF_000007865	MAP_RS03245	0		MAP_RS03245	MAP4_RS16075	RC58_RS16040	RE97_RS16070	A0V42_RS03250	CEP84_RS00355	CEG92_RS03345	EC391_RS08315	EC390_RS14420	EGM63_RS03440	EGM64_RS06165	EGM60_RS03060	EGA31_RS17190
629	13	DUF3073 domain-containing protein	GCF_000007865	MAP_RS03250	0		MAP_RS03250	MAP4_RS16070	RC58_RS16035	RE97_RS16065	A0V42_RS03255	CEP84_RS00350	CEG92_RS03350	EC391_RS08310	EC390_RS14425	EGM63_RS03435	EGM64_RS06170	EGM60_RS03065	EGA31_RS17185
630	13	folate-binding protein	GCF_000007865	MAP_RS03255	0		MAP_RS03255	MAP4_RS16065	RC58_RS16030	RE97_RS16060	A0V42_RS03260	CEP84_RS00345	CEG92_RS03355	EC391_RS08305	EC390_RS14430	EGM63_RS03430	EGM64_RS06175	EGM60_RS03070	EGA31_RS17180
631	13	4-amino-4-deoxychorismate lyase	GCF_000007865	MAP_RS03260	0		MAP_RS03260	MAP4_RS16060	RC58_RS16025	RE97_RS16055	A0V42_RS03265	CEP84_RS00340	CEG92_RS03360	EC391_RS08300	EC390_RS14435	EGM63_RS03425	EGM64_RS06180	EGM60_RS03075	EGA31_RS17175
632	13	FABP family protein	GCF_000007865	MAP_RS03265	0		MAP_RS03265	MAP4_RS16055	RC58_RS16020	RE97_RS16050	A0V42_RS03270	CEP84_RS00335	CEG92_RS03365	EC391_RS08295	EC390_RS14440	EGM63_RS03420	EGM64_RS06185	EGM60_RS03080	EGA31_RS17170
634	13	DUF1416 domain-containing protein	GCF_000007865	MAP_RS03275	0		MAP_RS03275	MAP4_RS16045	RC58_RS16010	RE97_RS16040	A0V42_RS03275	CEP84_RS00330	CEG92_RS03375	EC391_RS08290	EC390_RS14445	EGM63_RS03415	EGM64_RS06190	EGM60_RS03085	EGA31_RS17165
635	13	sulfurtransferase	GCF_000007865	MAP_RS03280	0		MAP_RS03280	MAP4_RS16040	RC58_RS16005	RE97_RS16035	A0V42_RS03280	CEP84_RS00325	CEG92_RS03380	EC391_RS08285	EC390_RS14450	EGM63_RS03410	EGM64_RS06195	EGM60_RS03090	EGA31_RS17160
636	13	DUF4395 domain-containing protein	GCF_000007865	MAP_RS03285	0		MAP_RS03285	MAP4_RS16035	RC58_RS16000	RE97_RS16030	A0V42_RS03285	CEP84_RS00320	CEG92_RS03385	EC391_RS08280	EC390_RS14455	EGM63_RS03405	EGM64_RS06200	EGM60_RS03095	EGA31_RS17155
637	13	thioredoxin	GCF_000007865	MAP_RS03290	0		MAP_RS03290	MAP4_RS16030	RC58_RS15995	RE97_RS16025	A0V42_RS03290	CEP84_RS00315	CEG92_RS03390	EC391_RS08275	EC390_RS14460	EGM63_RS03400	EGM64_RS06205	EGM60_RS03100	EGA31_RS17150
638	13	DUF2993 domain-containing protein	GCF_000007865	MAP_RS03295	0		MAP_RS03295	MAP4_RS16025	RC58_RS15990	RE97_RS16020	A0V42_RS03295	CEP84_RS00310	CEG92_RS03395	EC391_RS08270	EC390_RS14465	EGM63_RS03395	EGM64_RS06210	EGM60_RS03105	EGA31_RS17145
639	13	DNA-binding response regulator	GCF_000007865	MAP_RS03300	0		MAP_RS03300	MAP4_RS16020	RC58_RS15985	RE97_RS16015	A0V42_RS03300	CEP84_RS00305	CEG92_RS03400	EC391_RS08265	EC390_RS14470	EGM63_RS03390	EGM64_RS06215	EGM60_RS03110	EGA31_RS17140
641	13	phosphate ABC transporter substrate-binding protein PstS	GCF_000007865	MAP_RS03310	0		MAP_RS03310	MAP4_RS16010	RC58_RS15975	RE97_RS16005	A0V42_RS03310	CEP84_RS00295	CEG92_RS03410	EC391_RS08255	EC390_RS14480	EGM63_RS03380	EGM64_RS06225	EGM60_RS03120	EGA31_RS17130
642	13	phosphate ABC transporter permease subunit PstC	GCF_000007865	MAP_RS03315	0		MAP_RS03315	MAP4_RS16005	RC58_RS15970	RE97_RS16000	A0V42_RS03315	CEP84_RS00290	CEG92_RS03415	EC391_RS08250	EC390_RS14485	EGM63_RS03375	EGM64_RS06230	EGM60_RS03125	EGA31_RS17125
643	13	phosphate ABC transporter, permease protein PstA	GCF_000007865	MAP_RS03320	0		MAP_RS03320	MAP4_RS16000	RC58_RS15965	RE97_RS15995	A0V42_RS03320	CEP84_RS00285	CEG92_RS03420	EC391_RS08245	EC390_RS14490	EGM63_RS03370	EGM64_RS06235	EGM60_RS03130	EGA31_RS17120
644	13	phosphate ABC transporter ATP-binding protein	GCF_000007865	MAP_RS03325	0		MAP_RS03325	MAP4_RS15995	RC58_RS15960	RE97_RS15990	A0V42_RS03325	CEP84_RS00280	CEG92_RS03425	EC391_RS08240	EC390_RS14495	EGM63_RS03365	EGM64_RS06240	EGM60_RS03135	EGA31_RS17115
645	13	phosphate transport system regulatory protein PhoU	GCF_000007865	MAP_RS03330	0		MAP_RS03330	MAP4_RS15990	RC58_RS15955	RE97_RS15985	A0V42_RS03330	CEP84_RS00270	CEG92_RS03430	EC391_RS08230	EC390_RS14505	EGM63_RS03355	EGM64_RS06250	EGM60_RS03145	EGA31_RS17110
646	13	LytR family transcriptional regulator	GCF_000007865	MAP_RS03335	0		MAP_RS03335	MAP4_RS15985	RC58_RS15950	RE97_RS15980	A0V42_RS03335	CEP84_RS00265	CEG92_RS03435	EC391_RS08225	EC390_RS14510	EGM63_RS03350	EGM64_RS06255	EGM60_RS03150	EGA31_RS17105
647	13	hypothetical protein	GCF_000007865	MAP_RS22470	0		MAP_RS22470	MAP4_RS22895	RC58_RS22935	RE97_RS22985	A0V42_RS22435	CEP84_RS00260	CEG92_RS03440	EC391_RS08220	EC390_RS14515	EGM63_RS03345	EGM64_RS06260	EGM60_RS03155	EGA31_RS17100
648	13	tRNA dihydrouridine synthase DusB	GCF_000007865	MAP_RS03340	0		MAP_RS03340	MAP4_RS15980	RC58_RS15945	RE97_RS15975	A0V42_RS03340	CEP84_RS00255	CEG92_RS03445	EC391_RS08215	EC390_RS14520	EGM63_RS03340	EGM64_RS06265	EGM60_RS03160	EGA31_RS17095
649	13	acyl-ACP desaturase	GCF_000007865	MAP_RS03345	0		MAP_RS03345	MAP4_RS15975	RC58_RS15940	RE97_RS15970	A0V42_RS03345	CEP84_RS00250	CEG92_RS03450	EC391_RS08210	EC390_RS14525	EGM63_RS03335	EGM64_RS06270	EGM60_RS03165	EGA31_RS17090
650	13	TetR/AcrR family transcriptional regulator	GCF_000007865	MAP_RS03350	0		MAP_RS03350	MAP4_RS15970	RC58_RS15935	RE97_RS15965	A0V42_RS03350	CEP84_RS00245	CEG92_RS03455	EC391_RS08205	EC390_RS14530	EGM63_RS03330	EGM64_RS06275	EGM60_RS03170	EGA31_RS17085
651	13	DUF2236 domain-containing protein	GCF_000007865	MAP_RS03355	0		MAP_RS03355	MAP4_RS15965	RC58_RS15930	RE97_RS15960	A0V42_RS03355	CEP84_RS00240	CEG92_RS03460	EC391_RS08200	EC390_RS14535	EGM63_RS03325	EGM64_RS06280	EGM60_RS03175	EGA31_RS17080
652	13	transcriptional regulator	GCF_000007865	MAP_RS03365	0	FG-In	MAP_RS03365	MAP4_RS15955	RC58_RS15920	RE97_RS15950	A0V42_RS03365	CEP84_RS00230	CEG92_RS03470	EC391_RS08190	EC390_RS14545	EGM63_RS03315	EGM64_RS06290	EGM60_RS03185	EGA31_RS17070
653	13	nucleoside deaminase	GCF_000007865	MAP_RS03370	0		MAP_RS03370	MAP4_RS15950	RC58_RS15915	RE97_RS15945	A0V42_RS03370	CEP84_RS00225	CEG92_RS03475	EC391_RS08185	EC390_RS14550	EGM63_RS03310	EGM64_RS06295	EGM60_RS03190	EGA31_RS17065
656	13	NAD(P)-dependent oxidoreductase	GCF_000007865	MAP_RS03405	0		MAP_RS03405	MAP4_RS15915	RC58_RS15880	RE97_RS15910	A0V42_RS03405	CEP84_RS00190	CEG92_RS03510	EC391_RS08150	EC390_RS14585	EGM63_RS03275	EGM64_RS06330	EGM60_RS03225	EGA31_RS17030
657	13	TetR/AcrR family transcriptional regulator	GCF_000007865	MAP_RS03410	0		MAP_RS03410	MAP4_RS15910	RC58_RS15875	RE97_RS15905	A0V42_RS03410	CEP84_RS00185	CEG92_RS03515	EC391_RS08145	EC390_RS14590	EGM63_RS03270	EGM64_RS06335	EGM60_RS03230	EGA31_RS17025
658	13	ferredoxin	GCF_000007865	MAP_RS03415	0		MAP_RS03415	MAP4_RS15905	RC58_RS15870	RE97_RS15900	A0V42_RS03415	CEP84_RS00180	CEG92_RS03520	EC391_RS08140	EC390_RS14595	EGM63_RS03265	EGM64_RS06340	EGM60_RS03235	EGA31_RS17020
659	13	cytochrome P450	GCF_000007865	MAP_RS03420	0		MAP_RS03420	MAP4_RS15900	RC58_RS15865	RE97_RS15895	A0V42_RS03420	CEP84_RS00175	CEG92_RS03525	EC391_RS08135	EC390_RS14600	EGM63_RS03260	EGM64_RS06345	EGM60_RS03240	EGA31_RS17015
660	13	hypothetical protein	GCF_000007865	MAP_RS22480	0		MAP_RS22480	MAP4_RS15895	RC58_RS15860	RE97_RS15890	A0V42_RS22445	CEP84_RS00170	CEG92_RS03530	EC391_RS08130	EC390_RS14605	EGM63_RS03255	EGM64_RS06350	EGM60_RS03245	EGA31_RS17010
661	13	cold-shock protein	GCF_000007865	MAP_RS03425	0		MAP_RS03425	MAP4_RS15890	RC58_RS15855	RE97_RS15885	A0V42_RS03425	CEP84_RS00165	CEG92_RS03535	EC391_RS08125	EC390_RS14610	EGM63_RS03250	EGM64_RS06355	EGM60_RS03250	EGA31_RS17005
662	13	hypothetical protein	GCF_000007865	MAP_RS03430	0		MAP_RS03430	MAP4_RS15885	RC58_RS15850	RE97_RS15880	A0V42_RS03430	CEP84_RS00160	CEG92_RS03540	EC391_RS08120	EC390_RS14615	EGM63_RS03245	EGM64_RS06360	EGM60_RS03255	EGA31_RS17000
663	13	methyltransferase domain-containing protein	GCF_000007865	MAP_RS22485	0	FG-In	MAP_RS22485	MAP4_RS22885	RC58_RS22925	RE97_RS22975	A0V42_RS22450	CEP84_RS00155	CEG92_RS03545	EC391_RS08115	EC390_RS14620	EGM63_RS03240	EGM64_RS06365	EGM60_RS03260	EGA31_RS16995
664	13	short chain dehydrogenase	GCF_000007865	MAP_RS03435	0	FG-In	MAP_RS03435	MAP4_RS15880	RC58_RS15845	RE97_RS15875	A0V42_RS03435	CEP84_RS00150	CEG92_RS03550	EC391_RS08110	EC390_RS14625	EGM63_RS03235	EGM64_RS06370	EGM60_RS03265	EGA31_RS16990
665	13	methylmalonyl-CoA mutase	GCF_000007865	MAP_RS03440	0		MAP_RS03440	MAP4_RS15875	RC58_RS15840	RE97_RS15870	A0V42_RS03440	CEP84_RS00145	CEG92_RS03555	EC391_RS08105	EC390_RS14630	EGM63_RS03230	EGM64_RS06375	EGM60_RS03270	EGA31_RS16985
666	13	methylmalonyl-CoA mutase	GCF_000007865	MAP_RS03445	0		MAP_RS03445	MAP4_RS15870	RC58_RS15835	RE97_RS15865	A0V42_RS03445	CEP84_RS00140	CEG92_RS03560	EC391_RS08100	EC390_RS14635	EGM63_RS03225	EGM64_RS06380	EGM60_RS03275	EGA31_RS16980
667	13	TIGR03564 family F420-dependent LLM class oxidoreductase	GCF_000007865	MAP_RS03450	0		MAP_RS03450	MAP4_RS15865	RC58_RS15830	RE97_RS15860	A0V42_RS03450	CEP84_RS00135	CEG92_RS03565	EC391_RS08095	EC390_RS14640	EGM63_RS03220	EGM64_RS06385	EGM60_RS03280	EGA31_RS16975
668	13	CoA transferase	GCF_000007865	MAP_RS03455	0		MAP_RS03455	MAP4_RS15860	RC58_RS15825	RE97_RS15855	A0V42_RS03455	CEP84_RS00130	CEG92_RS03570	EC391_RS08090	EC390_RS14645	EGM63_RS03215	EGM64_RS06390	EGM60_RS03285	EGA31_RS16970
669	13	amidohydrolase	GCF_000007865	MAP_RS03460	0		MAP_RS03460	MAP4_RS15855	RC58_RS15820	RE97_RS15850	A0V42_RS03460	CEP84_RS00125	CEG92_RS03575	EC391_RS08085	EC390_RS14650	EGM63_RS03210	EGM64_RS06395	EGM60_RS03290	EGA31_RS16965
670	13	hypothetical protein	GCF_000007865	MAP_RS03465	0		MAP_RS03465	MAP4_RS15850	RC58_RS15815	RE97_RS15845	A0V42_RS03465	CEP84_RS00120	CEG92_RS03580	EC391_RS08080	EC390_RS14655	EGM63_RS03205	EGM64_RS06400	EGM60_RS03295	EGA31_RS16960
671	13	(2Fe-2S)-binding protein	GCF_000007865	MAP_RS03470	0		MAP_RS03470	MAP4_RS15845	RC58_RS15810	RE97_RS15840	A0V42_RS03470	CEP84_RS00115	CEG92_RS03585	EC391_RS08075	EC390_RS14660	EGM63_RS03200	EGM64_RS06405	EGM60_RS03300	EGA31_RS16955
672	13	acyl-CoA synthetase (AMP-forming)/AMP-acid ligase II	GCF_000007865	MAP_RS03475	0		MAP_RS03475	MAP4_RS15840	RC58_RS15805	RE97_RS15835	A0V42_RS03475	CEP84_RS00110	CEG92_RS03590	EC391_RS08070	EC390_RS14665	EGM63_RS03195	EGM64_RS06410	EGM60_RS03305	EGA31_RS16950
673	13	acyl-CoA dehydrogenase	GCF_000007865	MAP_RS03480	0		MAP_RS03480	MAP4_RS15835	RC58_RS15800	RE97_RS15830	A0V42_RS03480	CEP84_RS00105	CEG92_RS03595	EC391_RS08065	EC390_RS14670	EGM63_RS03190	EGM64_RS06415	EGM60_RS03310	EGA31_RS16945
674	13	acyl-CoA dehydrogenase	GCF_000007865	MAP_RS03485	0		MAP_RS03485	MAP4_RS15830	RC58_RS15795	RE97_RS15825	A0V42_RS03485	CEP84_RS00100	CEG92_RS03600	EC391_RS08060	EC390_RS14675	EGM63_RS03185	EGM64_RS06420	EGM60_RS03315	EGA31_RS16940
675	13	enoyl-CoA hydratase/isomerase family protein	GCF_000007865	MAP_RS03490	0		MAP_RS03490	MAP4_RS15825	RC58_RS15790	RE97_RS15820	A0V42_RS03490	CEP84_RS00095	CEG92_RS03605	EC391_RS08055	EC390_RS14680	EGM63_RS03180	EGM64_RS06425	EGM60_RS03320	EGA31_RS16935
676	13	proline iminopeptidase	GCF_000007865	MAP_RS03495	0		MAP_RS03495	MAP4_RS15820	RC58_RS15785	RE97_RS15815	A0V42_RS03495	CEP84_RS00090	CEG92_RS03610	EC391_RS08050	EC390_RS14685	EGM63_RS03175	EGM64_RS06430	EGM60_RS03325	EGA31_RS16930
677	13	phenolic acid decarboxylase	GCF_000007865	MAP_RS03500	0		MAP_RS03500	MAP4_RS15815	RC58_RS15780	RE97_RS15810	A0V42_RS03500	CEP84_RS00085	CEG92_RS03615	EC391_RS08045	EC390_RS14690	EGM63_RS03170	EGM64_RS06435	EGM60_RS03330	EGA31_RS16925
678	13	acetyl-CoA C-acyltransferase	GCF_000007865	MAP_RS03505	0		MAP_RS03505	MAP4_RS15810	RC58_RS15775	RE97_RS15805	A0V42_RS03505	CEP84_RS00080	CEG92_RS03620	EC391_RS08040	EC390_RS14695	EGM63_RS03165	EGM64_RS06440	EGM60_RS03335	EGA31_RS16920
679	13	methylmalonyl Co-A mutase-associated GTPase MeaB	GCF_000007865	MAP_RS03510	0		MAP_RS03510	MAP4_RS15805	RC58_RS15770	RE97_RS15800	A0V42_RS03510	CEP84_RS00075	CEG92_RS03625	EC391_RS08035	EC390_RS14700	EGM63_RS03160	EGM64_RS06445	EGM60_RS03340	EGA31_RS16915
680	13	dehydrogenase	GCF_000007865	MAP_RS03515	0		MAP_RS03515	MAP4_RS15800	RC58_RS15765	RE97_RS15795	A0V42_RS03515	CEP84_RS00070	CEG92_RS03630	EC391_RS08030	EC390_RS14705	EGM63_RS03155	EGM64_RS06450	EGM60_RS03345	EGA31_RS16910
681	13	DNA-binding response regulator	GCF_000007865	MAP_RS03520	0		MAP_RS03520	MAP4_RS15795	RC58_RS15760	RE97_RS15790	A0V42_RS03520	CEP84_RS00065	CEG92_RS03635	EC391_RS08025	EC390_RS14710	EGM63_RS03150	EGM64_RS06455	EGM60_RS03350	EGA31_RS16905
682	13	ATP-binding protein	GCF_000007865	MAP_RS03525	0		MAP_RS03525	MAP4_RS15790	RC58_RS15755	RE97_RS15785	A0V42_RS03525	CEP84_RS00060	CEG92_RS03640	EC391_RS08020	EC390_RS14715	EGM63_RS03145	EGM64_RS06460	EGM60_RS03355	EGA31_RS16900
684	13	IclR family transcriptional regulator	GCF_000007865	MAP_RS03535	0		MAP_RS03535	MAP4_RS15780	RC58_RS15745	RE97_RS15775	A0V42_RS03535	CEP84_RS00050	CEG92_RS03650	EC391_RS08010	EC390_RS14725	EGM63_RS03135	EGM64_RS06470	EGM60_RS03365	EGA31_RS15015
685	13	alpha/beta hydrolase	GCF_000007865	MAP_RS03540	0		MAP_RS03540	MAP4_RS15775	RC58_RS15740	RE97_RS15770	A0V42_RS03540	CEP84_RS00045	CEG92_RS03655	EC391_RS08005	EC390_RS14730	EGM63_RS03130	EGM64_RS06475	EGM60_RS03370	EGA31_RS15010
686	13	3-(3-hydroxy-phenyl)propionate/3-hydroxycinnamic acid hydroxylase	GCF_000007865	MAP_RS03545	0		MAP_RS03545	MAP4_RS15770	RC58_RS15735	RE97_RS15765	A0V42_RS03545	CEP84_RS00040	CEG92_RS03660	EC391_RS08000	EC390_RS14735	EGM63_RS03125	EGM64_RS06480	EGM60_RS03375	EGA31_RS15005
687	13	3-carboxyethylcatechol 2,3-dioxygenase	GCF_000007865	MAP_RS03550	0		MAP_RS03550	MAP4_RS15765	RC58_RS15730	RE97_RS15760	A0V42_RS03550	CEP84_RS00035	CEG92_RS03665	EC391_RS07995	EC390_RS14740	EGM63_RS03120	EGM64_RS06485	EGM60_RS03380	EGA31_RS15000
688	13	FAD-binding protein	GCF_000007865	MAP_RS03555	0		MAP_RS03555	MAP4_RS15760	RC58_RS15725	RE97_RS15755	A0V42_RS03555	CEP84_RS00030	CEG92_RS03670	EC391_RS07990	EC390_RS14745	EGM63_RS03115	EGM64_RS06490	EGM60_RS03385	EGA31_RS14995
689	13	LLM class flavin-dependent oxidoreductase	GCF_000007865	MAP_RS03560	0		MAP_RS03560	MAP4_RS15755	RC58_RS15720	RE97_RS15750	A0V42_RS03560	CEP84_RS00025	CEG92_RS03675	EC391_RS07985	EC390_RS14750	EGM63_RS03110	EGM64_RS06495	EGM60_RS03390	EGA31_RS14990
690	13	3-alpha-hydroxysteroid dehydrogenase	GCF_000007865	MAP_RS03565	0		MAP_RS03565	MAP4_RS15750	RC58_RS15715	RE97_RS15745	A0V42_RS03565	CEP84_RS00020	CEG92_RS03680	EC391_RS07980	EC390_RS14755	EGM63_RS03105	EGM64_RS06500	EGM60_RS03395	EGA31_RS14985
691	13	cyclase	GCF_000390085	MAP4_RS15745	0		MAP_RS03570	MAP4_RS15745	RC58_RS15710	RE97_RS15740	A0V42_RS03570	CEP84_RS00015	CEG92_RS03685	EC391_RS07975	EC390_RS14760	EGM63_RS03100	EGM64_RS06505	EGM60_RS03400	EGA31_RS14980
692	13	alpha/beta hydrolase	GCF_000007865	MAP_RS03575	0		MAP_RS03575	MAP4_RS15740	RC58_RS15705	RE97_RS15735	A0V42_RS03575	CEP84_RS00010	CEG92_RS03690	EC391_RS07970	EC390_RS14765	EGM63_RS03095	EGM64_RS06510	EGM60_RS03405	EGA31_RS14975
693	13	multicopper oxidase family protein	GCF_000835225	RC58_RS15700	0		MAP_RS03580	MAP4_RS15735	RC58_RS15700	RE97_RS15730	A0V42_RS03580	CEP84_RS00005	CEG92_RS03695	EC391_RS07965	EC390_RS14770	EGM63_RS03090	EGM64_RS06515	EGM60_RS03410	EGA31_RS14970
695	13	TetR/AcrR family transcriptional regulator	GCF_000007865	MAP_RS03590	0		MAP_RS03590	MAP4_RS15725	RC58_RS15690	RE97_RS15720	A0V42_RS03590	CEP84_RS22925	CEG92_RS03705	EC391_RS07955	EC390_RS14780	EGM63_RS03080	EGM64_RS06525	EGM60_RS03420	EGA31_RS14960
696	13	ferredoxin	GCF_000007865	MAP_RS03595	0		MAP_RS03595	MAP4_RS15720	RC58_RS15685	RE97_RS15715	A0V42_RS03595	CEP84_RS22920	CEG92_RS03710	EC391_RS07950	EC390_RS14785	EGM63_RS03075	EGM64_RS06530	EGM60_RS03425	EGA31_RS14955
697	13	cytochrome P450	GCF_000007865	MAP_RS03600	0		MAP_RS03600	MAP4_RS15715	RC58_RS15680	RE97_RS15710	A0V42_RS03600	CEP84_RS22915	CEG92_RS03715	EC391_RS07945	EC390_RS14790	EGM63_RS03070	EGM64_RS06535	EGM60_RS03430	EGA31_RS14950
698	13	amidohydrolase	GCF_000007865	MAP_RS03605	0		MAP_RS03605	MAP4_RS15710	RC58_RS15675	RE97_RS15705	A0V42_RS03605	CEP84_RS22910	CEG92_RS03720	EC391_RS07940	EC390_RS14795	EGM63_RS03065	EGM64_RS06540	EGM60_RS03435	EGA31_RS14945
699	13	aminopeptidase P family protein	GCF_000007865	MAP_RS03610	0		MAP_RS03610	MAP4_RS15705	RC58_RS15670	RE97_RS15700	A0V42_RS03610	CEP84_RS22905	CEG92_RS03725	EC391_RS07935	EC390_RS14800	EGM63_RS03060	EGM64_RS06545	EGM60_RS03440	EGA31_RS14940
700	13	aminopeptidase P family protein	GCF_000007865	MAP_RS03615	0		MAP_RS03615	MAP4_RS15700	RC58_RS15665	RE97_RS15695	A0V42_RS03615	CEP84_RS22900	CEG92_RS03730	EC391_RS07930	EC390_RS14805	EGM63_RS03055	EGM64_RS06550	EGM60_RS03445	EGA31_RS14935
701	13	CoA transferase	GCF_000007865	MAP_RS03620	0		MAP_RS03620	MAP4_RS15695	RC58_RS15660	RE97_RS15690	A0V42_RS03620	CEP84_RS22895	CEG92_RS03735	EC391_RS07925	EC390_RS14810	EGM63_RS03050	EGM64_RS06555	EGM60_RS03450	EGA31_RS14930
702	13	oxidoreductase	GCF_000007865	MAP_RS03625	0		MAP_RS03625	MAP4_RS15690	RC58_RS15655	RE97_RS15685	A0V42_RS03625	CEP84_RS22890	CEG92_RS03740	EC391_RS07920	EC390_RS14815	EGM63_RS03045	EGM64_RS06560	EGM60_RS03455	EGA31_RS14925
703	13	KR domain-containing protein	GCF_000007865	MAP_RS03630	0		MAP_RS03630	MAP4_RS15685	RC58_RS15650	RE97_RS15680	A0V42_RS03630	CEP84_RS22885	CEG92_RS03745	EC391_RS07915	EC390_RS14820	EGM63_RS03040	EGM64_RS06565	EGM60_RS03460	EGA31_RS14920
704	13	NAD(P)-dependent oxidoreductase	GCF_000390085	MAP4_RS15680	0		MAP_RS03635	MAP4_RS15680	RC58_RS15645	RE97_RS15675	A0V42_RS03635	CEP84_RS22880	CEG92_RS03750	EC391_RS07910	EC390_RS14825	EGM63_RS03035	EGM64_RS06570	EGM60_RS03465	EGA31_RS14915
705	13	TetR/AcrR family transcriptional regulator	GCF_000007865	MAP_RS03640	0		MAP_RS03640	MAP4_RS15675	RC58_RS15640	RE97_RS15670	A0V42_RS03640	CEP84_RS22875	CEG92_RS03755	EC391_RS07905	EC390_RS14830	EGM63_RS03030	EGM64_RS06575	EGM60_RS03470	EGA31_RS14910
706	13	acyl-CoA dehydrogenase	GCF_000007865	MAP_RS03645	0		MAP_RS03645	MAP4_RS15670	RC58_RS15635	RE97_RS15665	A0V42_RS03645	CEP84_RS22870	CEG92_RS03760	EC391_RS07900	EC390_RS14835	EGM63_RS03025	EGM64_RS06580	EGM60_RS03475	EGA31_RS14905
707	13	DUF4190 domain-containing protein	GCF_000007865	MAP_RS03650	0		MAP_RS03650	MAP4_RS15665	RC58_RS15630	RE97_RS15660	A0V42_RS03650	CEP84_RS22865	CEG92_RS03765	EC391_RS07895	EC390_RS14840	EGM63_RS03020	EGM64_RS06585	EGM60_RS03480	EGA31_RS14900
708	13	acyl-CoA dehydrogenase	GCF_000007865	MAP_RS03655	0		MAP_RS03655	MAP4_RS15660	RC58_RS15625	RE97_RS15655	A0V42_RS03655	CEP84_RS22860	CEG92_RS03770	EC391_RS07890	EC390_RS14845	EGM63_RS03015	EGM64_RS06590	EGM60_RS03485	EGA31_RS14895
709	13	nuclear transport factor 2 family protein	GCF_000007865	MAP_RS03665	0		MAP_RS03665	MAP4_RS15650	RC58_RS15615	RE97_RS15645	A0V42_RS03665	CEP84_RS22850	CEG92_RS03780	EC391_RS07880	EC390_RS14855	EGM63_RS03005	EGM64_RS06600	EGM60_RS03495	EGA31_RS14885
710	13	amidohydrolase family protein	GCF_000007865	MAP_RS03670	0		MAP_RS03670	MAP4_RS15645	RC58_RS15610	RE97_RS15640	A0V42_RS03670	CEP84_RS22845	CEG92_RS03785	EC391_RS07875	EC390_RS14860	EGM63_RS03000	EGM64_RS06605	EGM60_RS03500	EGA31_RS14880
711	13	hypothetical protein	GCF_000007865	MAP_RS03675	0		MAP_RS03675	MAP4_RS15640	RC58_RS15605	RE97_RS15635	A0V42_RS03675	CEP84_RS22840	CEG92_RS03790	EC391_RS07870	EC390_RS14865	EGM63_RS02995	EGM64_RS06610	EGM60_RS03505	EGA31_RS14875
712	13	aromatic ring-hydroxylating dioxygenase subunit alpha	GCF_000007865	MAP_RS03680	0		MAP_RS03680	MAP4_RS15635	RC58_RS15600	RE97_RS15630	A0V42_RS03680	CEP84_RS22835	CEG92_RS03795	EC391_RS07865	EC390_RS14870	EGM63_RS02990	EGM64_RS06615	EGM60_RS03510	EGA31_RS14870
713	13	carboxymuconolactone decarboxylase family protein	GCF_000007865	MAP_RS03685	0		MAP_RS03685	MAP4_RS15630	RC58_RS15595	RE97_RS15625	A0V42_RS03685	CEP84_RS22830	CEG92_RS03800	EC391_RS07860	EC390_RS14875	EGM63_RS02985	EGM64_RS06620	EGM60_RS03515	EGA31_RS14865
714	13	amidohydrolase	GCF_000007865	MAP_RS03690	0		MAP_RS03690	MAP4_RS15625	RC58_RS15590	RE97_RS15620	A0V42_RS03690	CEP84_RS22825	CEG92_RS03805	EC391_RS07855	EC390_RS14880	EGM63_RS02980	EGM64_RS06625	EGM60_RS03520	EGA31_RS14860
715	13	acyl-CoA dehydrogenase	GCF_000007865	MAP_RS03695	0		MAP_RS03695	MAP4_RS15620	RC58_RS15585	RE97_RS15615	A0V42_RS03695	CEP84_RS22820	CEG92_RS03810	EC391_RS07850	EC390_RS14885	EGM63_RS02975	EGM64_RS06630	EGM60_RS03525	EGA31_RS14855
716	13	acetyl-CoA C-acyltransferase	GCF_000007865	MAP_RS03700	0		MAP_RS03700	MAP4_RS15615	RC58_RS15580	RE97_RS15610	A0V42_RS03700	CEP84_RS22815	CEG92_RS03815	EC391_RS07845	EC390_RS14890	EGM63_RS02970	EGM64_RS06635	EGM60_RS03530	EGA31_RS14850
717	13	TetR/AcrR family transcriptional regulator	GCF_000007865	MAP_RS03705	0		MAP_RS03705	MAP4_RS15610	RC58_RS15575	RE97_RS15605	A0V42_RS03705	CEP84_RS22810	CEG92_RS03820	EC391_RS07840	EC390_RS14895	EGM63_RS02965	EGM64_RS06640	EGM60_RS03535	EGA31_RS14845
718	13	hypothetical protein	GCF_000007865	MAP_RS03710	0		MAP_RS03710	MAP4_RS15605	RC58_RS15570	RE97_RS15600	A0V42_RS03710	CEP84_RS22805	CEG92_RS03825	EC391_RS07835	EC390_RS14900	EGM63_RS02960	EGM64_RS06645	EGM60_RS03540	EGA31_RS14840
719	13	cytochrome P450	GCF_000007865	MAP_RS03715	0		MAP_RS03715	MAP4_RS15600	RC58_RS15565	RE97_RS15595	A0V42_RS03715	CEP84_RS22800	CEG92_RS03830	EC391_RS07830	EC390_RS14905	EGM63_RS02955	EGM64_RS06650	EGM60_RS03545	EGA31_RS14835
720	13	ferredoxin	GCF_000007865	MAP_RS03720	0		MAP_RS03720	MAP4_RS15595	RC58_RS15560	RE97_RS15590	A0V42_RS03720	CEP84_RS22795	CEG92_RS03835	EC391_RS07825	EC390_RS14910	EGM63_RS02950	EGM64_RS06655	EGM60_RS03550	EGA31_RS14830
721	13	DUF1330 domain-containing protein	GCF_000007865	MAP_RS03725	0		MAP_RS03725	MAP4_RS15590	RC58_RS15555	RE97_RS15585	A0V42_RS03725	CEP84_RS22790	CEG92_RS03840	EC391_RS07820	EC390_RS14915	EGM63_RS02945	EGM64_RS06660	EGM60_RS03555	EGA31_RS14825
722	13	ferredoxin	GCF_000007865	MAP_RS03730	0		MAP_RS03730	MAP4_RS15585	RC58_RS15550	RE97_RS15580	A0V42_RS03730	CEP84_RS22785	CEG92_RS03845	EC391_RS07815	EC390_RS14920	EGM63_RS02940	EGM64_RS06665	EGM60_RS03560	EGA31_RS14820
723	13	cytochrome P450	GCF_000007865	MAP_RS03735	0		MAP_RS03735	MAP4_RS15580	RC58_RS15545	RE97_RS15575	A0V42_RS03735	CEP84_RS22780	CEG92_RS03850	EC391_RS07810	EC390_RS14925	EGM63_RS02935	EGM64_RS06670	EGM60_RS03565	EGA31_RS14815
724	13	NAD(P)-dependent oxidoreductase	GCF_000007865	MAP_RS03740	0		MAP_RS03740	MAP4_RS15575	RC58_RS15540	RE97_RS15570	A0V42_RS03740	CEP84_RS22775	CEG92_RS03855	EC391_RS07805	EC390_RS14930	EGM63_RS02930	EGM64_RS06675	EGM60_RS03570	EGA31_RS14810
725	13	alpha/beta hydrolase	GCF_000007865	MAP_RS03745	0		MAP_RS03745	MAP4_RS15570	RC58_RS15535	RE97_RS15565	A0V42_RS03745	CEP84_RS22770	CEG92_RS03860	EC391_RS07800	EC390_RS14935	EGM63_RS02925	EGM64_RS06680	EGM60_RS03575	EGA31_RS14805
726	13	hypothetical protein	GCF_000007865	MAP_RS03750	0		MAP_RS03750	MAP4_RS15565	RC58_RS15530	RE97_RS15560	A0V42_RS03750	CEP84_RS22765	CEG92_RS03865	EC391_RS07795	EC390_RS14940	EGM63_RS02920	EGM64_RS06685	EGM60_RS03580	EGA31_RS14800
727	13	hypothetical protein	GCF_000007865	MAP_RS22490	0		MAP_RS22490	MAP4_RS22880	RC58_RS22920	RE97_RS22970	A0V42_RS22455	CEP84_RS22760	CEG92_RS03870	EC391_RS07790	EC390_RS14945	EGM63_RS02915	EGM64_RS06690	EGM60_RS03585	EGA31_RS14795
728	13	NAD(P)-dependent oxidoreductase	GCF_000007865	MAP_RS03755	0		MAP_RS03755	MAP4_RS15560	RC58_RS15525	RE97_RS15555	A0V42_RS03755	CEP84_RS22755	CEG92_RS03875	EC391_RS07785	EC390_RS14950	EGM63_RS02910	EGM64_RS06695	EGM60_RS03590	EGA31_RS14790
729	13	hypothetical protein	GCF_000007865	MAP_RS03760	0		MAP_RS03760	MAP4_RS15555	RC58_RS15520	RE97_RS15550	A0V42_RS03760	CEP84_RS22750	CEG92_RS03880	EC391_RS07780	EC390_RS14955	EGM63_RS02905	EGM64_RS06700	EGM60_RS03595	EGA31_RS14785
730	13	TIGR03564 family F420-dependent LLM class oxidoreductase	GCF_000007865	MAP_RS03765	0		MAP_RS03765	MAP4_RS15550	RC58_RS15515	RE97_RS15545	A0V42_RS03765	CEP84_RS22745	CEG92_RS03885	EC391_RS07775	EC390_RS14960	EGM63_RS02900	EGM64_RS06705	EGM60_RS03600	EGA31_RS14780
731	13	ferredoxin	GCF_000007865	MAP_RS03770	0		MAP_RS03770	MAP4_RS15545	RC58_RS15510	RE97_RS15540	A0V42_RS03770	CEP84_RS22740	CEG92_RS03890	EC391_RS07770	EC390_RS14965	EGM63_RS02895	EGM64_RS06710	EGM60_RS03605	EGA31_RS14775
733	13	hypothetical protein	GCF_000007865	MAP_RS03780	0		MAP_RS03780	MAP4_RS15535	RC58_RS15500	RE97_RS15530	A0V42_RS03780	CEP84_RS22730	CEG92_RS03900	EC391_RS07760	EC390_RS14975	EGM63_RS02885	EGM64_RS06720	EGM60_RS03615	EGA31_RS14765
734	13	alpha/beta hydrolase	GCF_000007865	MAP_RS03785	0		MAP_RS03785	MAP4_RS15530	RC58_RS15495	RE97_RS15525	A0V42_RS03785	CEP84_RS22725	CEG92_RS03905	EC391_RS07755	EC390_RS14980	EGM63_RS02880	EGM64_RS06725	EGM60_RS03620	EGA31_RS14760
735	13	Rieske (2Fe-2S) protein	GCF_000007865	MAP_RS03790	0		MAP_RS03790	MAP4_RS15525	RC58_RS15490	RE97_RS15520	A0V42_RS03790	CEP84_RS22720	CEG92_RS03910	EC391_RS07750	EC390_RS14985	EGM63_RS02875	EGM64_RS06730	EGM60_RS03625	EGA31_RS14755
736	13	amidohydrolase	GCF_000007865	MAP_RS03795	0		MAP_RS03795	MAP4_RS15520	RC58_RS15485	RE97_RS15515	A0V42_RS03795	CEP84_RS22715	CEG92_RS03915	EC391_RS07745	EC390_RS14990	EGM63_RS02870	EGM64_RS06735	EGM60_RS03630	EGA31_RS14750
737	13	amidohydrolase	GCF_000007865	MAP_RS03800	0		MAP_RS03800	MAP4_RS15515	RC58_RS15480	RE97_RS15510	A0V42_RS03800	CEP84_RS22710	CEG92_RS03920	EC391_RS07740	EC390_RS14995	EGM63_RS02865	EGM64_RS06740	EGM60_RS03635	EGA31_RS14745
738	13	NAD(P)-dependent oxidoreductase	GCF_000007865	MAP_RS03805	0		MAP_RS03805	MAP4_RS15510	RC58_RS15475	RE97_RS15505	A0V42_RS03805	CEP84_RS22705	CEG92_RS03925	EC391_RS07735	EC390_RS15000	EGM63_RS02860	EGM64_RS06745	EGM60_RS03640	EGA31_RS14740
739	13	4-carboxymuconolactone decarboxylase	GCF_000007865	MAP_RS03810	0		MAP_RS03810	MAP4_RS15505	RC58_RS15470	RE97_RS15500	A0V42_RS03810	CEP84_RS22700	CEG92_RS03930	EC391_RS07730	EC390_RS15005	EGM63_RS02855	EGM64_RS06750	EGM60_RS03645	EGA31_RS14735
740	13	nitroreductase	GCF_000007865	MAP_RS03815	0		MAP_RS03815	MAP4_RS15500	RC58_RS15465	RE97_RS15495	A0V42_RS03815	CEP84_RS22695	CEG92_RS03935	EC391_RS07725	EC390_RS15010	EGM63_RS02850	EGM64_RS06755	EGM60_RS03650	EGA31_RS14730
742	13	acyl-CoA dehydrogenase	GCF_000007865	MAP_RS03825	0		MAP_RS03825	MAP4_RS15490	RC58_RS15455	RE97_RS15485	A0V42_RS03825	CEP84_RS22685	CEG92_RS03945	EC391_RS07715	EC390_RS15020	EGM63_RS02840	EGM64_RS06765	EGM60_RS03660	EGA31_RS14720
743	13	membrane protein	GCF_000007865	MAP_RS03830	0		MAP_RS03830	MAP4_RS15485	RC58_RS15450	RE97_RS15480	A0V42_RS03830	CEP84_RS22680	CEG92_RS03950	EC391_RS07710	EC390_RS15025	EGM63_RS02835	EGM64_RS06770	EGM60_RS03665	EGA31_RS14715
744	13	hypothetical protein	GCF_000007865	MAP_RS03835	0		MAP_RS03835	MAP4_RS15480	RC58_RS15445	RE97_RS15475	A0V42_RS03835	CEP84_RS22675	CEG92_RS03955	EC391_RS07705	EC390_RS15030	EGM63_RS02830	EGM64_RS06775	EGM60_RS03670	EGA31_RS14710
745	13	hypothetical protein	GCF_000007865	MAP_RS03840	0		MAP_RS03840	MAP4_RS15475	RC58_RS15440	RE97_RS15470	A0V42_RS03840	CEP84_RS22670	CEG92_RS03960	EC391_RS07700	EC390_RS15035	EGM63_RS02825	EGM64_RS06780	EGM60_RS03675	EGA31_RS14705
746	13	hypothetical protein	GCF_000007865	MAP_RS03845	0		MAP_RS03845	MAP4_RS15470	RC58_RS15435	RE97_RS15465	A0V42_RS03845	CEP84_RS22665	CEG92_RS03965	EC391_RS07695	EC390_RS15040	EGM63_RS02820	EGM64_RS06785	EGM60_RS03680	EGA31_RS14700
747	13	ferredoxin	GCF_000007865	MAP_RS03855	0		MAP_RS03855	MAP4_RS15460	RC58_RS15425	RE97_RS15455	A0V42_RS03855	CEP84_RS22655	CEG92_RS03975	EC391_RS07685	EC390_RS15050	EGM63_RS02810	EGM64_RS06795	EGM60_RS03690	EGA31_RS14690
748	13	NAD(P)-dependent oxidoreductase	GCF_000007865	MAP_RS03860	0		MAP_RS03860	MAP4_RS15455	RC58_RS15420	RE97_RS15450	A0V42_RS03860	CEP84_RS22650	CEG92_RS03980	EC391_RS07680	EC390_RS15055	EGM63_RS02805	EGM64_RS06800	EGM60_RS03695	EGA31_RS14685
749	13	aldehyde dehydrogenase	GCF_000007865	MAP_RS03865	0		MAP_RS03865	MAP4_RS15450	RC58_RS15415	RE97_RS15445	A0V42_RS03865	CEP84_RS22645	CEG92_RS03985	EC391_RS07675	EC390_RS15060	EGM63_RS02800	EGM64_RS06805	EGM60_RS03700	EGA31_RS14680
750	13	CoA transferase	GCF_000007865	MAP_RS03870	0		MAP_RS03870	MAP4_RS15445	RC58_RS15410	RE97_RS15440	A0V42_RS03870	CEP84_RS22640	CEG92_RS03990	EC391_RS07670	EC390_RS15065	EGM63_RS02795	EGM64_RS06810	EGM60_RS03705	EGA31_RS14675
751	13	ABC transporter permease	GCF_000007865	MAP_RS03875	0		MAP_RS03875	MAP4_RS15440	RC58_RS15405	RE97_RS15435	A0V42_RS03875	CEP84_RS22635	CEG92_RS03995	EC391_RS07665	EC390_RS15070	EGM63_RS02790	EGM64_RS06815	EGM60_RS03710	EGA31_RS14670
752	13	ABC transporter permease	GCF_000007865	MAP_RS03880	0		MAP_RS03880	MAP4_RS15435	RC58_RS15400	RE97_RS15430	A0V42_RS03880	CEP84_RS22630	CEG92_RS04000	EC391_RS07660	EC390_RS15075	EGM63_RS02785	EGM64_RS06820	EGM60_RS03715	EGA31_RS14665
753	13	MCE family protein	GCF_000007865	MAP_RS03885	0		MAP_RS03885	MAP4_RS15430	RC58_RS15395	RE97_RS15425	A0V42_RS03885	CEP84_RS22625	CEG92_RS04005	EC391_RS07655	EC390_RS15080	EGM63_RS02780	EGM64_RS06825	EGM60_RS03720	EGA31_RS14660
754	13	MCE family protein	GCF_000007865	MAP_RS03890	0		MAP_RS03890	MAP4_RS15425	RC58_RS15390	RE97_RS15420	A0V42_RS03890	CEP84_RS22620	CEG92_RS04010	EC391_RS07650	EC390_RS15085	EGM63_RS02775	EGM64_RS06830	EGM60_RS03725	EGA31_RS14655
755	13	MCE family protein	GCF_000007865	MAP_RS03895	0		MAP_RS03895	MAP4_RS15420	RC58_RS15385	RE97_RS15415	A0V42_RS03895	CEP84_RS22615	CEG92_RS04015	EC391_RS07645	EC390_RS15090	EGM63_RS02770	EGM64_RS06835	EGM60_RS03730	EGA31_RS14650
756	13	MCE family protein	GCF_000007865	MAP_RS03905	0		MAP_RS03905	MAP4_RS15410	RC58_RS15375	RE97_RS15405	A0V42_RS03905	CEP84_RS22605	CEG92_RS04025	EC391_RS07635	EC390_RS15100	EGM63_RS02760	EGM64_RS06845	EGM60_RS03740	EGA31_RS14640
757	13	MCE family protein	GCF_000007865	MAP_RS03910	0		MAP_RS03910	MAP4_RS15405	RC58_RS15370	RE97_RS15400	A0V42_RS03910	CEP84_RS22600	CEG92_RS04030	EC391_RS07630	EC390_RS15105	EGM63_RS02755	EGM64_RS06850	EGM60_RS03745	EGA31_RS14635
758	13	hypothetical protein	GCF_000007865	MAP_RS03915	0		MAP_RS03915	MAP4_RS15400	RC58_RS15365	RE97_RS15395	A0V42_RS03915	CEP84_RS22595	CEG92_RS04035	EC391_RS07625	EC390_RS15110	EGM63_RS02750	EGM64_RS06855	EGM60_RS03750	EGA31_RS14630
759	13	hypothetical protein	GCF_000007865	MAP_RS03920	0		MAP_RS03920	MAP4_RS15395	RC58_RS15360	RE97_RS15390	A0V42_RS03920	CEP84_RS22590	CEG92_RS04040	EC391_RS07620	EC390_RS15115	EGM63_RS02745	EGM64_RS06860	EGM60_RS03755	EGA31_RS14625
760	13	hypothetical protein	GCF_000007865	MAP_RS03925	0		MAP_RS03925	MAP4_RS15390	RC58_RS15355	RE97_RS15385	A0V42_RS03925	CEP84_RS22585	CEG92_RS04045	EC391_RS07615	EC390_RS15120	EGM63_RS02740	EGM64_RS06865	EGM60_RS03760	EGA31_RS14620
761	13	hypothetical protein	GCF_000007865	MAP_RS03930	0		MAP_RS03930	MAP4_RS15385	RC58_RS15350	RE97_RS15380	A0V42_RS03930	CEP84_RS22580	CEG92_RS04050	EC391_RS07610	EC390_RS15125	EGM63_RS02735	EGM64_RS06870	EGM60_RS03765	EGA31_RS14615
762	13	TetR/AcrR family transcriptional regulator	GCF_000007865	MAP_RS03935	0		MAP_RS03935	MAP4_RS15380	RC58_RS15345	RE97_RS15375	A0V42_RS03935	CEP84_RS22575	CEG92_RS04055	EC391_RS07605	EC390_RS15130	EGM63_RS02730	EGM64_RS06875	EGM60_RS03770	EGA31_RS14610
763	13	hypothetical protein	GCF_000007865	MAP_RS03940	0		MAP_RS03940	MAP4_RS15375	RC58_RS15340	RE97_RS15370	A0V42_RS03940	CEP84_RS22570	CEG92_RS04060	EC391_RS07600	EC390_RS15135	EGM63_RS02725	EGM64_RS06880	EGM60_RS03775	EGA31_RS14605
764	13	hypothetical protein	GCF_000007865	MAP_RS03945	0		MAP_RS03945	MAP4_RS15370	RC58_RS15335	RE97_RS15365	A0V42_RS03945	CEP84_RS22565	CEG92_RS04065	EC391_RS07595	EC390_RS15140	EGM63_RS02720	EGM64_RS06885	EGM60_RS03780	EGA31_RS14600
765	13	cytochrome c oxidase subunit 3 family protein	GCF_000007865	MAP_RS03950	0		MAP_RS03950	MAP4_RS15365	RC58_RS15330	RE97_RS15360	A0V42_RS03950	CEP84_RS22560	CEG92_RS04070	EC391_RS07590	EC390_RS15145	EGM63_RS02715	EGM64_RS06890	EGM60_RS03785	EGA31_RS14595
766	13	hypothetical protein	GCF_000007865	MAP_RS03955	0		MAP_RS03955	MAP4_RS15360	RC58_RS15325	RE97_RS15355	A0V42_RS03955	CEP84_RS22555	CEG92_RS04075	EC391_RS07585	EC390_RS15150	EGM63_RS02710	EGM64_RS06895	EGM60_RS03790	EGA31_RS14590
768	13	TetR/AcrR family transcriptional regulator	GCF_000007865	MAP_RS03965	0		MAP_RS03965	MAP4_RS15350	RC58_RS15315	RE97_RS15345	A0V42_RS03965	CEP84_RS22545	CEG92_RS04085	EC391_RS07575	EC390_RS15160	EGM63_RS02700	EGM64_RS06905	EGM60_RS03800	EGA31_RS14580
769	13	hypothetical protein	GCF_000007865	MAP_RS03970	0		MAP_RS03970	MAP4_RS15345	RC58_RS15310	RE97_RS15340	A0V42_RS03970	CEP84_RS22540	CEG92_RS04090	EC391_RS07570	EC390_RS15165	EGM63_RS02695	EGM64_RS06910	EGM60_RS03805	EGA31_RS14575
770	13	enoyl-CoA hydratase/isomerase family protein	GCF_000007865	MAP_RS03975	0		MAP_RS03975	MAP4_RS15340	RC58_RS15305	RE97_RS15335	A0V42_RS03975	CEP84_RS22535	CEG92_RS04095	EC391_RS07565	EC390_RS15170	EGM63_RS02690	EGM64_RS06915	EGM60_RS03810	EGA31_RS14570
771	13	hypothetical protein	GCF_000007865	MAP_RS03980	0		MAP_RS03980	MAP4_RS15335	RC58_RS15300	RE97_RS15330	A0V42_RS03980	CEP84_RS22530	CEG92_RS04100	EC391_RS07560	EC390_RS15175	EGM63_RS02685	EGM64_RS06920	EGM60_RS03815	EGA31_RS14565
772	13	amidohydrolase	GCF_000007865	MAP_RS03985	0		MAP_RS03985	MAP4_RS15330	RC58_RS15295	RE97_RS15325	A0V42_RS03985	CEP84_RS22525	CEG92_RS04105	EC391_RS07555	EC390_RS15180	EGM63_RS02680	EGM64_RS06925	EGM60_RS03820	EGA31_RS14560
773	13	fatty acid--CoA ligase family protein	GCF_000007865	MAP_RS03990	0		MAP_RS03990	MAP4_RS15325	RC58_RS15290	RE97_RS15320	A0V42_RS03990	CEP84_RS22520	CEG92_RS04110	EC391_RS07550	EC390_RS15185	EGM63_RS02675	EGM64_RS06930	EGM60_RS03825	EGA31_RS14555
774	13	hypothetical protein	GCF_000007865	MAP_RS03995	0		MAP_RS03995	MAP4_RS15320	RC58_RS15285	RE97_RS15315	A0V42_RS03995	CEP84_RS22515	CEG92_RS04115	EC391_RS07545	EC390_RS15190	EGM63_RS02670	EGM64_RS06935	EGM60_RS03830	EGA31_RS14550
775	13	(2Fe-2S)-binding protein	GCF_000007865	MAP_RS04000	0		MAP_RS04000	MAP4_RS15315	RC58_RS15280	RE97_RS15310	A0V42_RS04000	CEP84_RS22510	CEG92_RS04120	EC391_RS07540	EC390_RS15195	EGM63_RS02665	EGM64_RS06940	EGM60_RS03835	EGA31_RS14545
776	13	pyruvate decarboxylase	GCF_000007865	MAP_RS04005	0		MAP_RS04005	MAP4_RS15310	RC58_RS15275	RE97_RS15305	A0V42_RS04005	CEP84_RS22505	CEG92_RS04125	EC391_RS07535	EC390_RS15200	EGM63_RS02660	EGM64_RS06945	EGM60_RS03840	EGA31_RS14540
777	13	cyclase	GCF_000007865	MAP_RS04010	0		MAP_RS04010	MAP4_RS15305	RC58_RS15270	RE97_RS15300	A0V42_RS04010	CEP84_RS22500	CEG92_RS04130	EC391_RS07530	EC390_RS15205	EGM63_RS02655	EGM64_RS06950	EGM60_RS03845	EGA31_RS14535
778	13	CoA transferase	GCF_000007865	MAP_RS04015	0		MAP_RS04015	MAP4_RS15300	RC58_RS15265	RE97_RS15295	A0V42_RS04015	CEP84_RS22495	CEG92_RS04135	EC391_RS07525	EC390_RS15210	EGM63_RS02650	EGM64_RS06955	EGM60_RS03850	EGA31_RS14530
779	13	cyclase	GCF_000007865	MAP_RS04020	0		MAP_RS04020	MAP4_RS15295	RC58_RS15260	RE97_RS15290	A0V42_RS04020	CEP84_RS22490	CEG92_RS04140	EC391_RS07520	EC390_RS15215	EGM63_RS02645	EGM64_RS06960	EGM60_RS03855	EGA31_RS14525
780	13	cyclase	GCF_000007865	MAP_RS04025	0		MAP_RS04025	MAP4_RS15290	RC58_RS15255	RE97_RS15285	A0V42_RS04025	CEP84_RS22485	CEG92_RS04145	EC391_RS07515	EC390_RS15220	EGM63_RS02640	EGM64_RS06965	EGM60_RS03860	EGA31_RS14520
782	13	acetyl-CoA acetyltransferase	GCF_000007865	MAP_RS04035	0		MAP_RS04035	MAP4_RS15280	RC58_RS15245	RE97_RS15275	A0V42_RS04035	CEP84_RS22475	CEG92_RS04155	EC391_RS07505	EC390_RS15230	EGM63_RS02630	EGM64_RS06975	EGM60_RS03870	EGA31_RS14505
783	13	3-hydroxyacyl-CoA dehydrogenase	GCF_000007865	MAP_RS04040	0		MAP_RS04040	MAP4_RS15275	RC58_RS15240	RE97_RS15270	A0V42_RS04040	CEP84_RS22470	CEG92_RS04160	EC391_RS07500	EC390_RS15235	EGM63_RS02625	EGM64_RS06980	EGM60_RS03875	EGA31_RS14500
784	13	class I SAM-dependent methyltransferase	GCF_000007865	MAP_RS04045	0		MAP_RS04045	MAP4_RS15270	RC58_RS15235	RE97_RS15265	A0V42_RS04045	CEP84_RS22465	CEG92_RS04165	EC391_RS07495	EC390_RS15240	EGM63_RS02620	EGM64_RS06985	EGM60_RS03880	EGA31_RS14495
785	13	TIGR03620 family F420-dependent LLM class oxidoreductase	GCF_000007865	MAP_RS04050	0		MAP_RS04050	MAP4_RS15265	RC58_RS15230	RE97_RS15260	A0V42_RS04050	CEP84_RS22460	CEG92_RS04170	EC391_RS07490	EC390_RS15245	EGM63_RS02615	EGM64_RS06990	EGM60_RS03885	EGA31_RS14490
786	13	FAD-dependent oxidoreductase	GCF_000007865	MAP_RS04055	0		MAP_RS04055	MAP4_RS15260	RC58_RS15225	RE97_RS15255	A0V42_RS04055	CEP84_RS22455	CEG92_RS04175	EC391_RS07485	EC390_RS15250	EGM63_RS02610	EGM64_RS06995	EGM60_RS03890	EGA31_RS14485
787	13	TetR/AcrR family transcriptional regulator	GCF_000007865	MAP_RS04060	0		MAP_RS04060	MAP4_RS15255	RC58_RS15220	RE97_RS15250	A0V42_RS04060	CEP84_RS22450	CEG92_RS04180	EC391_RS07480	EC390_RS15255	EGM63_RS02605	EGM64_RS07000	EGM60_RS03895	EGA31_RS14480
788	13	TIGR03560 family F420-dependent LLM class oxidoreductase	GCF_000390085	MAP4_RS15250	0		MAP_RS04065	MAP4_RS15250	RC58_RS15215	RE97_RS15245	A0V42_RS04065	CEP84_RS22445	CEG92_RS04185	EC391_RS07475	EC390_RS15260	EGM63_RS02600	EGM64_RS07005	EGM60_RS03900	EGA31_RS14475
789	13	antibiotic biosynthesis monooxygenase	GCF_000007865	MAP_RS04070	0		MAP_RS04070	MAP4_RS15245	RC58_RS15210	RE97_RS15240	A0V42_RS04070	CEP84_RS22440	CEG92_RS04190	EC391_RS07470	EC390_RS15265	EGM63_RS02595	EGM64_RS07010	EGM60_RS03905	EGA31_RS14470
790	13	DNA-binding protein	GCF_000007865	MAP_RS04075	0		MAP_RS04075	MAP4_RS15240	RC58_RS15205	RE97_RS15235	A0V42_RS04075	CEP84_RS22435	CEG92_RS04195	EC391_RS07465	EC390_RS15270	EGM63_RS02590	EGM64_RS07015	EGM60_RS03910	EGA31_RS14465
791	13	thiolase family protein	GCF_000007865	MAP_RS04080	0		MAP_RS04080	MAP4_RS15235	RC58_RS15200	RE97_RS15230	A0V42_RS04080	CEP84_RS22430	CEG92_RS04200	EC391_RS07460	EC390_RS15275	EGM63_RS02585	EGM64_RS07020	EGM60_RS03915	EGA31_RS14460
792	13	helicase	GCF_000007865	MAP_RS04085	0		MAP_RS04085	MAP4_RS15230	RC58_RS15195	RE97_RS15225	A0V42_RS04085	CEP84_RS22425	CEG92_RS04205	EC391_RS07455	EC390_RS15280	EGM63_RS02580	EGM64_RS07025	EGM60_RS03920	EGA31_RS14455
793	13	DNA-binding protein	GCF_000007865	MAP_RS04090	0		MAP_RS04090	MAP4_RS15225	RC58_RS15190	RE97_RS15220	A0V42_RS04090	CEP84_RS22420	CEG92_RS04210	EC391_RS07450	EC390_RS15285	EGM63_RS02575	EGM64_RS07030	EGM60_RS03925	EGA31_RS14450
794	13	hypothetical protein	GCF_000007865	MAP_RS04095	0		MAP_RS04095	MAP4_RS15220	RC58_RS15185	RE97_RS15215	A0V42_RS04095	CEP84_RS22415	CEG92_RS04215	EC391_RS07445	EC390_RS15290	EGM63_RS02570	EGM64_RS07035	EGM60_RS03930	EGA31_RS14445
795	13	cyclic pyranopterin monophosphate synthase MoaC	GCF_000007865	MAP_RS04100	0		MAP_RS04100	MAP4_RS15215	RC58_RS15180	RE97_RS15210	A0V42_RS04100	CEP84_RS22410	CEG92_RS04220	EC391_RS07440	EC390_RS15295	EGM63_RS02565	EGM64_RS07040	EGM60_RS03935	EGA31_RS14440
796	13	molybdenum cofactor biosynthesis protein	GCF_000007865	MAP_RS04105	0		MAP_RS04105	MAP4_RS15210	RC58_RS15175	RE97_RS15205	A0V42_RS04105	CEP84_RS22405	CEG92_RS04225	EC391_RS07435	EC390_RS15300	EGM63_RS02560	EGM64_RS07045	EGM60_RS03940	EGA31_RS14435
797	13	molybdenum cofactor biosynthesis protein MoaE	GCF_000007865	MAP_RS04110	0		MAP_RS04110	MAP4_RS15205	RC58_RS15170	RE97_RS15200	A0V42_RS04110	CEP84_RS22400	CEG92_RS04230	EC391_RS07430	EC390_RS15305	EGM63_RS02555	EGM64_RS07050	EGM60_RS03945	EGA31_RS14430
799	13	MoaD/ThiS family protein	GCF_000007865	MAP_RS04120	0		MAP_RS04120	MAP4_RS15195	RC58_RS15160	RE97_RS15190	A0V42_RS04120	CEP84_RS22390	CEG92_RS04240	EC391_RS07420	EC390_RS15315	EGM63_RS02545	EGM64_RS07060	EGM60_RS03955	EGA31_RS14420
800	13	YccF domain-containing protein	GCF_000007865	MAP_RS04130	0		MAP_RS04130	MAP4_RS15185	RC58_RS15150	RE97_RS15180	A0V42_RS04130	CEP84_RS22380	CEG92_RS04250	EC391_RS07410	EC390_RS15325	EGM63_RS02535	EGM64_RS07070	EGM60_RS03965	EGA31_RS14410
801	13	cold-shock protein	GCF_000007865	MAP_RS04135	0		MAP_RS04135	MAP4_RS15180	RC58_RS15145	RE97_RS15175	A0V42_RS04135	CEP84_RS22375	CEG92_RS04255	EC391_RS07405	EC390_RS15330	EGM63_RS02530	EGM64_RS07075	EGM60_RS03970	EGA31_RS14405
802	13	acyl-CoA dehydrogenase	GCF_000007865	MAP_RS04140	0		MAP_RS04140	MAP4_RS15175	RC58_RS15140	RE97_RS15170	A0V42_RS04140	CEP84_RS22370	CEG92_RS04260	EC391_RS07400	EC390_RS15335	EGM63_RS02525	EGM64_RS07080	EGM60_RS03975	EGA31_RS14400
803	13	glutathione S-transferase	GCF_000007865	MAP_RS04145	0		MAP_RS04145	MAP4_RS15170	RC58_RS15135	RE97_RS15165	A0V42_RS04145	CEP84_RS22365	CEG92_RS04265	EC391_RS07395	EC390_RS15340	EGM63_RS02520	EGM64_RS07085	EGM60_RS03980	EGA31_RS14395
804	13	DUF2771 domain-containing protein	GCF_000007865	MAP_RS04155	0		MAP_RS04155	MAP4_RS15160	RC58_RS15125	RE97_RS15155	A0V42_RS04155	CEP84_RS22355	CEG92_RS04275	EC391_RS07385	EC390_RS15350	EGM63_RS02510	EGM64_RS07095	EGM60_RS03990	EGA31_RS14385
805	13	MFS transporter	GCF_000007865	MAP_RS04160	0		MAP_RS04160	MAP4_RS15155	RC58_RS15120	RE97_RS15150	A0V42_RS04160	CEP84_RS22350	CEG92_RS04280	EC391_RS07380	EC390_RS15355	EGM63_RS02505	EGM64_RS07100	EGM60_RS03995	EGA31_RS14380
806	13	DUF3027 domain-containing protein	GCF_000007865	MAP_RS04165	0		MAP_RS04165	MAP4_RS15150	RC58_RS15115	RE97_RS15145	A0V42_RS04165	CEP84_RS22345	CEG92_RS04285	EC391_RS07375	EC390_RS15360	EGM63_RS02500	EGM64_RS07105	EGM60_RS04000	EGA31_RS14375
807	13	SRPBCC family protein	GCF_000007865	MAP_RS04170	0		MAP_RS04170	MAP4_RS15145	RC58_RS15110	RE97_RS15140	A0V42_RS04170	CEP84_RS22340	CEG92_RS04290	EC391_RS07370	EC390_RS15365	EGM63_RS02495	EGM64_RS07110	EGM60_RS04005	EGA31_RS14370
808	13	DUF2530 domain-containing protein	GCF_000007865	MAP_RS04175	0		MAP_RS04175	MAP4_RS15140	RC58_RS15105	RE97_RS15135	A0V42_RS04175	CEP84_RS22335	CEG92_RS04295	EC391_RS07365	EC390_RS15370	EGM63_RS02490	EGM64_RS07115	EGM60_RS04010	EGA31_RS14365
809	13	MarR family transcriptional regulator	GCF_000007865	MAP_RS04180	0		MAP_RS04180	MAP4_RS15135	RC58_RS15100	RE97_RS15130	A0V42_RS04180	CEP84_RS22330	CEG92_RS04300	EC391_RS07360	EC390_RS15375	EGM63_RS02485	EGM64_RS07120	EGM60_RS04015	EGA31_RS14360
810	13	RNA methyltransferase	GCF_000007865	MAP_RS04185	0		MAP_RS04185	MAP4_RS15130	RC58_RS15095	RE97_RS15125	A0V42_RS04185	CEP84_RS22325	CEG92_RS04305	EC391_RS07355	EC390_RS15380	EGM63_RS02480	EGM64_RS07125	EGM60_RS04020	EGA31_RS14355
811	13	DUF2537 domain-containing protein	GCF_000007865	MAP_RS04190	0		MAP_RS04190	MAP4_RS15125	RC58_RS15090	RE97_RS15120	A0V42_RS04190	CEP84_RS22320	CEG92_RS04310	EC391_RS07350	EC390_RS15385	EGM63_RS02475	EGM64_RS07130	EGM60_RS04025	EGA31_RS14350
812	13	DUF3071 domain-containing protein	GCF_000007865	MAP_RS04195	0		MAP_RS04195	MAP4_RS15120	RC58_RS15085	RE97_RS15115	A0V42_RS04195	CEP84_RS22315	CEG92_RS04315	EC391_RS07345	EC390_RS15390	EGM63_RS02470	EGM64_RS07135	EGM60_RS04030	EGA31_RS14345
813	13	phosphoserine transaminase	GCF_000007865	MAP_RS04200	0		MAP_RS04200	MAP4_RS15115	RC58_RS15080	RE97_RS15110	A0V42_RS04200	CEP84_RS22310	CEG92_RS04320	EC391_RS07340	EC390_RS15395	EGM63_RS02465	EGM64_RS07140	EGM60_RS04035	EGA31_RS14340
814	13	diiron oxygenase	GCF_000007865	MAP_RS04205	0		MAP_RS04205	MAP4_RS15110	RC58_RS15075	RE97_RS15105	A0V42_RS04205	CEP84_RS22305	CEG92_RS04325	EC391_RS07335	EC390_RS15400	EGM63_RS02460	EGM64_RS07145	EGM60_RS04040	EGA31_RS14335
816	13	VOC family protein	GCF_000007865	MAP_RS04215	0		MAP_RS04215	MAP4_RS15100	RC58_RS15065	RE97_RS15095	A0V42_RS04215	CEP84_RS22295	CEG92_RS04335	EC391_RS07325	EC390_RS15410	EGM63_RS02450	EGM64_RS07155	EGM60_RS04050	EGA31_RS14325
817	13	citrate synthase 2	GCF_000007865	MAP_RS04220	0		MAP_RS04220	MAP4_RS15095	RC58_RS15060	RE97_RS15090	A0V42_RS04220	CEP84_RS22290	CEG92_RS04340	EC391_RS07320	EC390_RS15415	EGM63_RS02445	EGM64_RS07160	EGM60_RS04055	EGA31_RS14320
818	13	pyridoxamine 5'-phosphate oxidase	GCF_000007865	MAP_RS04225	0		MAP_RS04225	MAP4_RS15090	RC58_RS15055	RE97_RS15085	A0V42_RS04225	CEP84_RS22285	CEG92_RS04345	EC391_RS07315	EC390_RS15420	EGM63_RS02440	EGM64_RS07165	EGM60_RS04060	EGA31_RS14315
819	13	citrate synthase	GCF_000007865	MAP_RS04230	0		MAP_RS04230	MAP4_RS15085	RC58_RS15050	RE97_RS15080	A0V42_RS04230	CEP84_RS22280	CEG92_RS04350	EC391_RS07310	EC390_RS15425	EGM63_RS02435	EGM64_RS07170	EGM60_RS04065	EGA31_RS14310
820	13	NAD(P)/FAD-dependent oxidoreductase	GCF_000007865	MAP_RS04235	0		MAP_RS04235	MAP4_RS15080	RC58_RS15045	RE97_RS15075	A0V42_RS04235	CEP84_RS22275	CEG92_RS04355	EC391_RS07305	EC390_RS15430	EGM63_RS02430	EGM64_RS07175	EGM60_RS04070	EGA31_RS14305
821	13	DUF2630 domain-containing protein	GCF_000007865	MAP_RS04240	0		MAP_RS04240	MAP4_RS15075	RC58_RS15040	RE97_RS15070	A0V42_RS04240	CEP84_RS22270	CEG92_RS04360	EC391_RS07300	EC390_RS15435	EGM63_RS02425	EGM64_RS07180	EGM60_RS04075	EGA31_RS14300
823	13	DNA-binding response regulator	GCF_000007865	MAP_RS04255	0		MAP_RS04255	MAP4_RS15060	RC58_RS15030	RE97_RS15060	A0V42_RS04255	CEP84_RS22255	CEG92_RS04375	EC391_RS07285	EC390_RS15450	EGM63_RS02410	EGM64_RS07195	EGM60_RS04090	EGA31_RS14285
824	13	MFS transporter	GCF_000007865	MAP_RS04260	0		MAP_RS04260	MAP4_RS15055	RC58_RS15025	RE97_RS15055	A0V42_RS04260	CEP84_RS22250	CEG92_RS04380	EC391_RS07280	EC390_RS15455	EGM63_RS02405	EGM64_RS07200	EGM60_RS04095	EGA31_RS14280
825	13	glycosyltransferase family 4 protein	GCF_000007865	MAP_RS04265	0		MAP_RS04265	MAP4_RS15050	RC58_RS15020	RE97_RS15050	A0V42_RS04265	CEP84_RS22245	CEG92_RS04385	EC391_RS07275	EC390_RS15460	EGM63_RS02400	EGM64_RS07205	EGM60_RS04100	EGA31_RS14275
826	13	glycogen debranching protein	GCF_000007865	MAP_RS04270	0		MAP_RS04270	MAP4_RS15045	RC58_RS15015	RE97_RS15045	A0V42_RS04270	CEP84_RS22240	CEG92_RS04390	EC391_RS07270	EC390_RS15465	EGM63_RS02395	EGM64_RS07210	EGM60_RS04105	EGA31_RS14270
827	13	2-polyprenyl-6-methoxyphenol hydroxylase	GCF_000835225	RC58_RS15010	0		MAP_RS04275	MAP4_RS15040	RC58_RS15010	RE97_RS15040	A0V42_RS04275	CEP84_RS22235	CEG92_RS04395	EC391_RS07265	EC390_RS15470	EGM63_RS02390	EGM64_RS07215	EGM60_RS04110	EGA31_RS14265
828	13	acetyl-CoA carboxylase carboxyltransferase subunit beta	GCF_000007865	MAP_RS04280	0		MAP_RS04280	MAP4_RS15035	RC58_RS15005	RE97_RS15035	A0V42_RS04280	CEP84_RS22230	CEG92_RS04400	EC391_RS07260	EC390_RS15475	EGM63_RS02385	EGM64_RS07220	EGM60_RS04115	EGA31_RS14260
829	13	enoyl-CoA hydratase	GCF_000007865	MAP_RS04285	0		MAP_RS04285	MAP4_RS15030	RC58_RS15000	RE97_RS15030	A0V42_RS04285	CEP84_RS22225	CEG92_RS04405	EC391_RS07255	EC390_RS15480	EGM63_RS02380	EGM64_RS07225	EGM60_RS04120	EGA31_RS14255
830	13	hypothetical protein	GCF_000007865	MAP_RS04290	0		MAP_RS04290	MAP4_RS15025	RC58_RS14995	RE97_RS15025	A0V42_RS04290	CEP84_RS22220	CEG92_RS04410	EC391_RS07250	EC390_RS15485	EGM63_RS02375	EGM64_RS07230	EGM60_RS04125	EGA31_RS14250
831	13	serine hydrolase	GCF_000007865	MAP_RS04295	0		MAP_RS04295	MAP4_RS15020	RC58_RS14990	RE97_RS15020	A0V42_RS04295	CEP84_RS22215	CEG92_RS04415	EC391_RS07245	EC390_RS15490	EGM63_RS02370	EGM64_RS07235	EGM60_RS04130	EGA31_RS14245
832	13	magnesium-transporting ATPase	GCF_000007865	MAP_RS04300	0		MAP_RS04300	MAP4_RS15015	RC58_RS14985	RE97_RS15015	A0V42_RS04300	CEP84_RS22210	CEG92_RS04420	EC391_RS07240	EC390_RS15495	EGM63_RS02365	EGM64_RS07240	EGM60_RS04135	EGA31_RS14240
833	13	antitoxin	GCF_000007865	MAP_RS04305	0		MAP_RS04305	MAP4_RS15010	RC58_RS14980	RE97_RS15010	A0V42_RS04305	CEP84_RS22205	CEG92_RS04425	EC391_RS07235	EC390_RS15500	EGM63_RS02360	EGM64_RS07245	EGM60_RS04140	EGA31_RS14235
834	13	SRPBCC family protein	GCF_000007865	MAP_RS04310	0		MAP_RS04310	MAP4_RS15005	RC58_RS14975	RE97_RS15005	A0V42_RS04310	CEP84_RS22200	CEG92_RS04430	EC391_RS07230	EC390_RS15505	EGM63_RS02355	EGM64_RS07250	EGM60_RS04145	EGA31_RS14230
835	13	hypothetical protein	GCF_000007865	MAP_RS04315	0		MAP_RS04315	MAP4_RS15000	RC58_RS14970	RE97_RS15000	A0V42_RS04315	CEP84_RS22195	CEG92_RS04435	EC391_RS07225	EC390_RS15510	EGM63_RS02350	EGM64_RS07255	EGM60_RS04150	EGA31_RS14225
836	13	DUF4185 domain-containing protein	GCF_000007865	MAP_RS04320	0		MAP_RS04320	MAP4_RS14995	RC58_RS14965	RE97_RS14995	A0V42_RS04320	CEP84_RS22190	CEG92_RS04440	EC391_RS07220	EC390_RS15515	EGM63_RS02345	EGM64_RS07260	EGM60_RS04155	EGA31_RS14220
837	13	hypothetical protein	GCF_000007865	MAP_RS04325	0		MAP_RS04325	MAP4_RS14990	RC58_RS14960	RE97_RS14990	A0V42_RS04325	CEP84_RS22185	CEG92_RS04445	EC391_RS07215	EC390_RS15520	EGM63_RS02340	EGM64_RS07265	EGM60_RS04160	EGA31_RS14215
838	13	hypothetical protein	GCF_000007865	MAP_RS22495	0		MAP_RS22495	MAP4_RS22875	RC58_RS22910	RE97_RS22960	A0V42_RS22460	CEP84_RS22180	CEG92_RS04450	EC391_RS07210	EC390_RS15525	EGM63_RS02335	EGM64_RS07270	EGM60_RS04165	EGA31_RS14210
839	13	hypothetical protein	GCF_000007865	MAP_RS04330	0		MAP_RS04330	MAP4_RS14985	RC58_RS14955	RE97_RS14985	A0V42_RS04330	CEP84_RS22175	CEG92_RS04455	EC391_RS07205	EC390_RS15530	EGM63_RS02330	EGM64_RS07275	EGM60_RS04170	EGA31_RS14205
842	13	hypothetical protein	GCF_000007865	MAP_RS04345	0		MAP_RS04345	MAP4_RS14970	RC58_RS14945	RE97_RS14970	A0V42_RS04345	CEP84_RS22160	CEG92_RS04470	EC391_RS07190	EC390_RS15545	EGM63_RS02310	EGM64_RS07295	EGM60_RS04190	EGA31_RS14185
843	13	hypothetical protein	GCF_000007865	MAP_RS04350	0		MAP_RS04350	MAP4_RS14965	RC58_RS14940	RE97_RS14965	A0V42_RS04350	CEP84_RS22155	CEG92_RS04475	EC391_RS07185	EC390_RS15550	EGM63_RS02305	EGM64_RS07300	EGM60_RS04195	EGA31_RS14180
844	13	hypothetical protein	GCF_000007865	MAP_RS22505	0		MAP_RS22505	MAP4_RS22865	RC58_RS22895	RE97_RS22950	A0V42_RS22470	CEP84_RS22150	CEG92_RS04480	EC391_RS07180	EC390_RS15555	EGM63_RS02300	EGM64_RS07305	EGM60_RS04200	EGA31_RS14175
846	13	hypothetical protein	GCF_000007865	MAP_RS04355	0		MAP_RS04355	MAP4_RS14960	RC58_RS14935	RE97_RS14960	A0V42_RS04355	CEP84_RS22140	CEG92_RS04490	EC391_RS07170	EC390_RS15565	EGM63_RS02290	EGM64_RS07315	EGM60_RS04210	EGA31_RS14165
847	13	hypothetical protein	GCF_000007865	MAP_RS22515	0		MAP_RS22515	MAP4_RS22855	RC58_RS22885	RE97_RS22940	A0V42_RS22480	CEP84_RS22135	CEG92_RS04495	EC391_RS07165	EC390_RS15570	EGM63_RS02285	EGM64_RS07320	EGM60_RS04215	EGA31_RS14160
848	13	hypothetical protein	GCF_000007865	MAP_RS04360	0		MAP_RS04360	MAP4_RS14955	RC58_RS14930	RE97_RS14955	A0V42_RS04360	CEP84_RS22130	CEG92_RS04500	EC391_RS07160	EC390_RS15575	EGM63_RS02280	EGM64_RS07325	EGM60_RS04220	EGA31_RS14155
849	13	hypothetical protein	GCF_000007865	MAP_RS04365	0		MAP_RS04365	MAP4_RS14950	RC58_RS14925	RE97_RS14950	A0V42_RS04365	CEP84_RS22125	CEG92_RS04505	EC391_RS07155	EC390_RS15580	EGM63_RS02275	EGM64_RS07330	EGM60_RS04225	EGA31_RS14150
850	13	hypothetical protein	GCF_000007865	MAP_RS04370	0		MAP_RS04370	MAP4_RS14945	RC58_RS14920	RE97_RS14945	A0V42_RS04370	CEP84_RS22120	CEG92_RS04510	EC391_RS07150	EC390_RS15585	EGM63_RS02270	EGM64_RS07335	EGM60_RS04230	EGA31_RS14145
851	13	hypothetical protein	GCF_000007865	MAP_RS04375	0		MAP_RS04375	MAP4_RS14940	RC58_RS14915	RE97_RS14940	A0V42_RS04375	CEP84_RS22115	CEG92_RS04515	EC391_RS07145	EC390_RS15590	EGM63_RS02265	EGM64_RS07340	EGM60_RS04235	EGA31_RS14140
852	13	hypothetical protein	GCF_000007865	MAP_RS22520	0		MAP_RS22520	MAP4_RS22350	RC58_RS14910	RE97_RS14935	A0V42_RS04380	CEP84_RS22110	CEG92_RS04520	EC391_RS07140	EC390_RS15595	EGM63_RS02260	EGM64_RS07345	EGM60_RS04240	EGA31_RS14135
853	13	hypothetical protein	GCF_000007865	MAP_RS22525	0		MAP_RS22525	MAP4_RS14935	RC58_RS14905	RE97_RS14930	A0V42_RS04385	CEP84_RS22105	CEG92_RS04525	EC391_RS07135	EC390_RS15600	EGM63_RS02250	EGM64_RS07355	EGM60_RS04250	EGA31_RS14125
855	13	cell division protein FtsK	GCF_000007865	MAP_RS22535	0		MAP_RS22535	MAP4_RS14930	RC58_RS14890	RE97_RS14915	A0V42_RS04395	CEP84_RS22090	CEG92_RS04540	EC391_RS07120	EC390_RS15615	EGM63_RS02235	EGM64_RS07370	EGM60_RS04265	EGA31_RS14110
856	13	DNA-binding protein	GCF_000007865	MAP_RS22540	0		MAP_RS22540	MAP4_RS22845	RC58_RS22875	RE97_RS22930	A0V42_RS04400	CEP84_RS22085	CEG92_RS04545	EC391_RS07115	EC390_RS15620	EGM63_RS02230	EGM64_RS07375	EGM60_RS04270	EGA31_RS14105
858	13	TIGR03621 family F420-dependent LLM class oxidoreductase	GCF_000007865	MAP_RS04395	0		MAP_RS04395	MAP4_RS14910	RC58_RS14865	RE97_RS14890	A0V42_RS04415	CEP84_RS22065	CEG92_RS04560	EC391_RS07095	EC390_RS15640	EGM63_RS02215	EGM64_RS07390	EGM60_RS04285	EGA31_RS14090
859	13	replication protein	GCF_000007865	MAP_RS04400	0		MAP_RS04400	MAP4_RS14905	RC58_RS14860	RE97_RS14885	A0V42_RS04420	CEP84_RS22060	CEG92_RS04565	EC391_RS07090	EC390_RS15645	EGM63_RS02210	EGM64_RS07395	EGM60_RS04290	EGA31_RS14085
860	13	divalent metal cation transporter	GCF_000007865	MAP_RS04405	0		MAP_RS04405	MAP4_RS14900	RC58_RS14855	RE97_RS14880	A0V42_RS04425	CEP84_RS22055	CEG92_RS04570	EC391_RS07085	EC390_RS15650	EGM63_RS02205	EGM64_RS07400	EGM60_RS04295	EGA31_RS14080
861	13	hypothetical protein	GCF_000007865	MAP_RS04410	0		MAP_RS04410	MAP4_RS14895	RC58_RS14850	RE97_RS14875	A0V42_RS04430	CEP84_RS22050	CEG92_RS04575	EC391_RS07080	EC390_RS15655	EGM63_RS02200	EGM64_RS07405	EGM60_RS04300	EGA31_RS14075
862	13	3-oxoacyl-ACP reductase	GCF_000007865	MAP_RS04415	0		MAP_RS04415	MAP4_RS14890	RC58_RS14845	RE97_RS14870	A0V42_RS04435	CEP84_RS22045	CEG92_RS04580	EC391_RS07075	EC390_RS15660	EGM63_RS02195	EGM64_RS07410	EGM60_RS04305	EGA31_RS14070
863	13	phosphate ABC transporter substrate-binding protein PstS	GCF_000007865	MAP_RS04420	0		MAP_RS04420	MAP4_RS14885	RC58_RS14840	RE97_RS14865	A0V42_RS04440	CEP84_RS22040	CEG92_RS04585	EC391_RS07070	EC390_RS15665	EGM63_RS02190	EGM64_RS07415	EGM60_RS04310	EGA31_RS14055
864	13	phosphate ABC transporter permease subunit PstC	GCF_000007865	MAP_RS04425	0		MAP_RS04425	MAP4_RS14880	RC58_RS14835	RE97_RS14860	A0V42_RS04445	CEP84_RS22035	CEG92_RS04590	EC391_RS07065	EC390_RS15670	EGM63_RS02185	EGM64_RS07420	EGM60_RS04315	EGA31_RS14050
865	13	phosphate ABC transporter, permease protein PstA	GCF_000007865	MAP_RS04430	0		MAP_RS04430	MAP4_RS14875	RC58_RS14830	RE97_RS14855	A0V42_RS04450	CEP84_RS22030	CEG92_RS04595	EC391_RS07060	EC390_RS15675	EGM63_RS02180	EGM64_RS07425	EGM60_RS04320	EGA31_RS14045
867	13	carbohydrate kinase	GCF_000007865	MAP_RS04440	0		MAP_RS04440	MAP4_RS14865	RC58_RS14820	RE97_RS14845	A0V42_RS04460	CEP84_RS22020	CEG92_RS04605	EC391_RS07050	EC390_RS15685	EGM63_RS02170	EGM64_RS07435	EGM60_RS04330	EGA31_RS14035
868	13	mannitol dehydrogenase family protein	GCF_000007865	MAP_RS04445	0		MAP_RS04445	MAP4_RS14860	RC58_RS14815	RE97_RS14840	A0V42_RS04465	CEP84_RS22015	CEG92_RS04610	EC391_RS07045	EC390_RS15690	EGM63_RS02165	EGM64_RS07440	EGM60_RS04335	EGA31_RS14030
869	13	haloacid dehalogenase	GCF_000007865	MAP_RS04450	0		MAP_RS04450	MAP4_RS14855	RC58_RS14810	RE97_RS14835	A0V42_RS04470	CEP84_RS22010	CEG92_RS04615	EC391_RS07040	EC390_RS15695	EGM63_RS02160	EGM64_RS07445	EGM60_RS04340	EGA31_RS14025
870	13	mannitol dehydrogenase family protein	GCF_000007865	MAP_RS04455	0		MAP_RS04455	MAP4_RS14850	RC58_RS14805	RE97_RS14830	A0V42_RS04475	CEP84_RS22005	CEG92_RS04620	EC391_RS07035	EC390_RS15700	EGM63_RS02155	EGM64_RS07450	EGM60_RS04345	EGA31_RS14020
871	13	ATP-dependent DNA ligase	GCF_000007865	MAP_RS04460	0		MAP_RS04460	MAP4_RS14845	RC58_RS14800	RE97_RS14825	A0V42_RS04480	CEP84_RS22000	CEG92_RS04625	EC391_RS07030	EC390_RS15705	EGM63_RS02150	EGM64_RS07455	EGM60_RS04350	EGA31_RS14015
872	13	2-hydroxyhepta-2,4-diene-1,7-dioate isomerase	GCF_000007865	MAP_RS04465	0		MAP_RS04465	MAP4_RS14840	RC58_RS14795	RE97_RS14820	A0V42_RS04485	CEP84_RS21995	CEG92_RS04630	EC391_RS07025	EC390_RS15710	EGM63_RS02145	EGM64_RS07460	EGM60_RS04355	EGA31_RS14010
873	13	SAM-dependent methyltransferase	GCF_000007865	MAP_RS04470	0		MAP_RS04470	MAP4_RS14835	RC58_RS14790	RE97_RS14815	A0V42_RS04490	CEP84_RS21990	CEG92_RS04635	EC391_RS07020	EC390_RS15715	EGM63_RS02140	EGM64_RS07465	EGM60_RS04360	EGA31_RS14005
874	13	enoyl-CoA hydratase/isomerase family protein	GCF_000007865	MAP_RS04475	0		MAP_RS04475	MAP4_RS14830	RC58_RS14785	RE97_RS14810	A0V42_RS04495	CEP84_RS21985	CEG92_RS04640	EC391_RS07015	EC390_RS15720	EGM63_RS02135	EGM64_RS07470	EGM60_RS04365	EGA31_RS14000
875	13	LLM class flavin-dependent oxidoreductase	GCF_000007865	MAP_RS04480	0		MAP_RS04480	MAP4_RS14825	RC58_RS14780	RE97_RS14805	A0V42_RS04500	CEP84_RS21980	CEG92_RS04645	EC391_RS07010	EC390_RS15725	EGM63_RS02130	EGM64_RS07475	EGM60_RS04370	EGA31_RS13995
876	13	anti-sigma factor antagonist	GCF_000007865	MAP_RS04485	0		MAP_RS04485	MAP4_RS14820	RC58_RS14775	RE97_RS14800	A0V42_RS04505	CEP84_RS21975	CEG92_RS04650	EC391_RS07005	EC390_RS15730	EGM63_RS02125	EGM64_RS07480	EGM60_RS04375	EGA31_RS13990
877	13	diiron oxygenase	GCF_000007865	MAP_RS04495	0		MAP_RS04495	MAP4_RS14810	RC58_RS14765	RE97_RS14790	A0V42_RS04515	CEP84_RS21965	CEG92_RS04660	EC391_RS06995	EC390_RS15740	EGM63_RS02115	EGM64_RS07490	EGM60_RS04385	EGA31_RS13980
878	13	precorrin-6A synthase (deacetylating)	GCF_000007865	MAP_RS04500	0		MAP_RS04500	MAP4_RS14805	RC58_RS14760	RE97_RS14785	A0V42_RS04520	CEP84_RS21960	CEG92_RS04665	EC391_RS06990	EC390_RS15745	EGM63_RS02110	EGM64_RS07495	EGM60_RS04390	EGA31_RS13975
879	13	Fpg/Nei family DNA glycosylase	GCF_000007865	MAP_RS04505	0		MAP_RS04505	MAP4_RS14800	RC58_RS14755	RE97_RS14780	A0V42_RS04525	CEP84_RS21955	CEG92_RS04670	EC391_RS06985	EC390_RS15750	EGM63_RS02105	EGM64_RS07500	EGM60_RS04395	EGA31_RS13970
880	13	short chain dehydrogenase	GCF_000007865	MAP_RS04510	0		MAP_RS04510	MAP4_RS14795	RC58_RS14750	RE97_RS14775	A0V42_RS04530	CEP84_RS21950	CEG92_RS04675	EC391_RS06980	EC390_RS15755	EGM63_RS02100	EGM64_RS07505	EGM60_RS04400	EGA31_RS13965
881	13	glucose-6-phosphate isomerase	GCF_000007865	MAP_RS04515	0		MAP_RS04515	MAP4_RS14790	RC58_RS14745	RE97_RS14770	A0V42_RS04535	CEP84_RS21945	CEG92_RS04680	EC391_RS06975	EC390_RS15760	EGM63_RS02095	EGM64_RS07510	EGM60_RS04405	EGA31_RS13960
882	13	chorismate mutase	GCF_000007865	MAP_RS04520	0		MAP_RS04520	MAP4_RS14785	RC58_RS14740	RE97_RS14765	A0V42_RS04540	CEP84_RS21940	CEG92_RS04685	EC391_RS06970	EC390_RS15765	EGM63_RS02090	EGM64_RS07515	EGM60_RS04410	EGA31_RS13955
883	13	DNA helicase PcrA	GCF_000007865	MAP_RS04525	0		MAP_RS04525	MAP4_RS14780	RC58_RS14735	RE97_RS14760	A0V42_RS04545	CEP84_RS21935	CEG92_RS04690	EC391_RS06965	EC390_RS15770	EGM63_RS02085	EGM64_RS07520	EGM60_RS04415	EGA31_RS13950
884	13	hypothetical protein	GCF_000007865	MAP_RS22550	0		MAP_RS22550	MAP4_RS22835	RC58_RS22865	RE97_RS22920	A0V42_RS22495	CEP84_RS21930	CEG92_RS04695	EC391_RS06960	EC390_RS15775	EGM63_RS02080	EGM64_RS07525	EGM60_RS04420	EGA31_RS13945
886	13	ADP-forming succinate--CoA ligase subunit beta	GCF_000007865	MAP_RS04540	0		MAP_RS04540	MAP4_RS14765	RC58_RS14720	RE97_RS14745	A0V42_RS04560	CEP84_RS21920	CEG92_RS04705	EC391_RS06950	EC390_RS15785	EGM63_RS02070	EGM64_RS07535	EGM60_RS04430	EGA31_RS13930
887	13	succinate--CoA ligase subunit alpha	GCF_000007865	MAP_RS04545	0		MAP_RS04545	MAP4_RS14760	RC58_RS14715	RE97_RS14740	A0V42_RS04565	CEP84_RS21915	CEG92_RS04710	EC391_RS06945	EC390_RS15790	EGM63_RS02065	EGM64_RS07540	EGM60_RS04435	EGA31_RS13925
888	13	acetyl-CoA acetyltransferase	GCF_000007865	MAP_RS04550	0		MAP_RS04550	MAP4_RS14755	RC58_RS14710	RE97_RS14735	A0V42_RS04570	CEP84_RS21910	CEG92_RS04715	EC391_RS06940	EC390_RS15795	EGM63_RS02060	EGM64_RS07545	EGM60_RS04440	EGA31_RS13920
889	13	TIGR03619 family F420-dependent LLM class oxidoreductase	GCF_000007865	MAP_RS04555	0		MAP_RS04555	MAP4_RS14750	RC58_RS14705	RE97_RS14730	A0V42_RS04575	CEP84_RS21905	CEG92_RS04720	EC391_RS06935	EC390_RS15800	EGM63_RS02055	EGM64_RS07550	EGM60_RS04445	EGA31_RS13915
890	13	hypothetical protein	GCF_000007865	MAP_RS04560	0		MAP_RS04560	MAP4_RS14745	RC58_RS14700	RE97_RS14725	A0V42_RS04580	CEP84_RS21900	CEG92_RS04725	EC391_RS06930	EC390_RS15805	EGM63_RS02050	EGM64_RS07555	EGM60_RS04450	EGA31_RS13910
891	13	hypothetical protein	GCF_000007865	MAP_RS04565	0		MAP_RS04565	MAP4_RS14740	RC58_RS14695	RE97_RS14720	A0V42_RS04585	CEP84_RS21895	CEG92_RS04730	EC391_RS06925	EC390_RS15810	EGM63_RS02045	EGM64_RS07560	EGM60_RS04455	EGA31_RS13905
892	13	phosphoribosylglycinamide formyltransferase	GCF_000007865	MAP_RS04570	0		MAP_RS04570	MAP4_RS14735	RC58_RS14690	RE97_RS14715	A0V42_RS04590	CEP84_RS21890	CEG92_RS04735	EC391_RS06920	EC390_RS15815	EGM63_RS02040	EGM64_RS07565	EGM60_RS04460	EGA31_RS13900
893	13	bifunctional phosphoribosylaminoimidazolecarboxamide formyltransferase/IMP cyclohydrolase PurH	GCF_000390085	MAP4_RS14730	0		MAP_RS04575	MAP4_RS14730	RC58_RS14685	RE97_RS14710	A0V42_RS04595	CEP84_RS21885	CEG92_RS04740	EC391_RS06915	EC390_RS15820	EGM63_RS02035	EGM64_RS07570	EGM60_RS04465	EGA31_RS13895
894	13	hypothetical protein	GCF_000007865	MAP_RS22555	0		MAP_RS22555	MAP4_RS22830	RC58_RS22855	RE97_RS22915	A0V42_RS04600	CEP84_RS21880	CEG92_RS04745	EC391_RS06910	EC390_RS15825	EGM63_RS02030	EGM64_RS07575	EGM60_RS04470	EGA31_RS13890
895	13	magnesium chelatase	GCF_000007865	MAP_RS04585	0		MAP_RS04585	MAP4_RS14720	RC58_RS14675	RE97_RS14700	A0V42_RS04605	CEP84_RS21875	CEG92_RS04750	EC391_RS06905	EC390_RS15830	EGM63_RS02025	EGM64_RS07580	EGM60_RS04475	EGA31_RS13885
896	13	VWA domain-containing protein	GCF_000007865	MAP_RS04590	0		MAP_RS04590	MAP4_RS14715	RC58_RS14670	RE97_RS14695	A0V42_RS04610	CEP84_RS21870	CEG92_RS04755	EC391_RS06900	EC390_RS15835	EGM63_RS02020	EGM64_RS07585	EGM60_RS04480	EGA31_RS13880
897	13	aldo/keto reductase	GCF_000007865	MAP_RS04595	0		MAP_RS04595	MAP4_RS14710	RC58_RS14665	RE97_RS14690	A0V42_RS04615	CEP84_RS21865	CEG92_RS04760	EC391_RS06895	EC390_RS15840	EGM63_RS02015	EGM64_RS07590	EGM60_RS04485	EGA31_RS13875
898	13	DUF1707 domain-containing protein	GCF_000007865	MAP_RS04600	0		MAP_RS04600	MAP4_RS14705	RC58_RS14660	RE97_RS14685	A0V42_RS04620	CEP84_RS21860	CEG92_RS04765	EC391_RS06890	EC390_RS15845	EGM63_RS02010	EGM64_RS07595	EGM60_RS04490	EGA31_RS13870
899	13	enoyl-CoA hydratase	GCF_000007865	MAP_RS04605	0		MAP_RS04605	MAP4_RS14700	RC58_RS14655	RE97_RS14680	A0V42_RS04625	CEP84_RS21855	CEG92_RS04770	EC391_RS06885	EC390_RS15850	EGM63_RS02005	EGM64_RS07600	EGM60_RS04495	EGA31_RS13865
900	13	acyl-CoA dehydrogenase	GCF_000007865	MAP_RS04610	0		MAP_RS04610	MAP4_RS14695	RC58_RS14650	RE97_RS14675	A0V42_RS04630	CEP84_RS21850	CEG92_RS04775	EC391_RS06880	EC390_RS15855	EGM63_RS02000	EGM64_RS07605	EGM60_RS04500	EGA31_RS13860
901	13	acetyl/propionyl-CoA carboxylase subunit alpha	GCF_000007865	MAP_RS04615	0		MAP_RS04615	MAP4_RS14690	RC58_RS14645	RE97_RS14670	A0V42_RS04635	CEP84_RS21845	CEG92_RS04780	EC391_RS06875	EC390_RS15860	EGM63_RS01995	EGM64_RS07610	EGM60_RS04505	EGA31_RS13845
902	13	acyl-CoA carboxylase subunit beta	GCF_000007865	MAP_RS04620	0		MAP_RS04620	MAP4_RS14685	RC58_RS14640	RE97_RS14665	A0V42_RS04640	CEP84_RS21840	CEG92_RS04785	EC391_RS06870	EC390_RS15865	EGM63_RS01990	EGM64_RS07615	EGM60_RS04510	EGA31_RS13840
903	13	acyl-CoA dehydrogenase	GCF_000007865	MAP_RS04625	0		MAP_RS04625	MAP4_RS14680	RC58_RS14635	RE97_RS14660	A0V42_RS04645	CEP84_RS21835	CEG92_RS04790	EC391_RS06865	EC390_RS15870	EGM63_RS01985	EGM64_RS07620	EGM60_RS04515	EGA31_RS13835
905	13	50S ribosomal protein L32	GCF_000007865	MAP_RS04635	0		MAP_RS04635	MAP4_RS14670	RC58_RS14625	RE97_RS14650	A0V42_RS04655	CEP84_RS21825	CEG92_RS04800	EC391_RS06855	EC390_RS15880	EGM63_RS01975	EGM64_RS07630	EGM60_RS04525	EGA31_RS13825
906	13	DNA-binding response regulator	GCF_000007865	MAP_RS04640	0		MAP_RS04640	MAP4_RS14665	RC58_RS14620	RE97_RS14645	A0V42_RS04660	CEP84_RS21820	CEG92_RS04805	EC391_RS06850	EC390_RS15885	EGM63_RS01970	EGM64_RS07635	EGM60_RS04530	EGA31_RS13820
907	13	two-component sensor histidine kinase	GCF_000007865	MAP_RS04645	0		MAP_RS04645	MAP4_RS14660	RC58_RS14615	RE97_RS14640	A0V42_RS04665	CEP84_RS21815	CEG92_RS04810	EC391_RS06845	EC390_RS15890	EGM63_RS01965	EGM64_RS07640	EGM60_RS04535	EGA31_RS13815
908	13	PDZ domain-containing protein	GCF_000007865	MAP_RS04650	0		MAP_RS04650	MAP4_RS14655	RC58_RS14610	RE97_RS14635	A0V42_RS04670	CEP84_RS21805	CEG92_RS04820	EC391_RS06835	EC390_RS15900	EGM63_RS01955	EGM64_RS07650	EGM60_RS04545	EGA31_RS13805
909	13	molybdenum cofactor biosynthesis protein	GCF_000007865	MAP_RS04655	0		MAP_RS04655	MAP4_RS14650	RC58_RS14605	RE97_RS14630	A0V42_RS04675	CEP84_RS21800	CEG92_RS04825	EC391_RS06830	EC390_RS15905	EGM63_RS01950	EGM64_RS07655	EGM60_RS04550	EGA31_RS13800
910	13	large-conductance mechanosensitive channel protein MscL	GCF_000007865	MAP_RS04660	0		MAP_RS04660	MAP4_RS14645	RC58_RS14600	RE97_RS14625	A0V42_RS04680	CEP84_RS21795	CEG92_RS04830	EC391_RS06825	EC390_RS15910	EGM63_RS01945	EGM64_RS07660	EGM60_RS04555	EGA31_RS13795
911	13	hypothetical protein	GCF_000007865	MAP_RS04665	0		MAP_RS04665	MAP4_RS14640	RC58_RS14595	RE97_RS14620	A0V42_RS04685	CEP84_RS21790	CEG92_RS04835	EC391_RS06820	EC390_RS15915	EGM63_RS01940	EGM64_RS07665	EGM60_RS04560	EGA31_RS13790
912	13	FmdB family transcriptional regulator	GCF_000007865	MAP_RS04670	0		MAP_RS04670	MAP4_RS14635	RC58_RS14590	RE97_RS14615	A0V42_RS04690	CEP84_RS21785	CEG92_RS04840	EC391_RS06815	EC390_RS15920	EGM63_RS01935	EGM64_RS07670	EGM60_RS04565	EGA31_RS13785
913	13	5-formyltetrahydrofolate cyclo-ligase	GCF_000007865	MAP_RS04675	0		MAP_RS04675	MAP4_RS14630	RC58_RS14585	RE97_RS14610	A0V42_RS04695	CEP84_RS21780	CEG92_RS04845	EC391_RS06810	EC390_RS15925	EGM63_RS01930	EGM64_RS07675	EGM60_RS04570	EGA31_RS13780
914	13	UTP--glucose-1-phosphate uridylyltransferase	GCF_000007865	MAP_RS04680	0		MAP_RS04680	MAP4_RS14625	RC58_RS14580	RE97_RS14605	A0V42_RS04700	CEP84_RS21775	CEG92_RS04850	EC391_RS06805	EC390_RS15930	EGM63_RS01925	EGM64_RS07680	EGM60_RS04575	EGA31_RS13775
915	13	molybdopterin molybdenumtransferase MoeA	GCF_000007865	MAP_RS04685	0		MAP_RS04685	MAP4_RS14620	RC58_RS14575	RE97_RS14600	A0V42_RS04705	CEP84_RS21770	CEG92_RS04855	EC391_RS06800	EC390_RS15935	EGM63_RS01920	EGM64_RS07685	EGM60_RS04580	EGA31_RS13770
916	13	N-acetyltransferase	GCF_000007865	MAP_RS04690	0		MAP_RS04690	MAP4_RS14615	RC58_RS14570	RE97_RS14595	A0V42_RS04710	CEP84_RS21765	CEG92_RS04860	EC391_RS06795	EC390_RS15940	EGM63_RS01915	EGM64_RS07690	EGM60_RS04585	EGA31_RS13765
917	13	hypothetical protein	GCF_000007865	MAP_RS04695	0		MAP_RS04695	MAP4_RS14610	RC58_RS14565	RE97_RS14590	A0V42_RS04715	CEP84_RS21760	CEG92_RS04865	EC391_RS06790	EC390_RS15945	EGM63_RS01910	EGM64_RS07695	EGM60_RS04590	EGA31_RS13760
918	13	hypothetical protein	GCF_000007865	MAP_RS04705	0		MAP_RS04705	MAP4_RS14600	RC58_RS14555	RE97_RS14580	A0V42_RS04725	CEP84_RS21750	CEG92_RS04875	EC391_RS06780	EC390_RS15955	EGM63_RS01900	EGM64_RS07705	EGM60_RS04600	EGA31_RS13750
919	13	TetR/AcrR family transcriptional regulator	GCF_000007865	MAP_RS04710	0		MAP_RS04710	MAP4_RS14595	RC58_RS14550	RE97_RS14575	A0V42_RS04730	CEP84_RS21745	CEG92_RS04880	EC391_RS06775	EC390_RS15960	EGM63_RS01890	EGM64_RS07715	EGM60_RS04610	EGA31_RS13740
920	13	DUF4442 domain-containing protein	GCF_000007865	MAP_RS04715	0		MAP_RS04715	MAP4_RS14590	RC58_RS14545	RE97_RS14570	A0V42_RS04735	CEP84_RS21740	CEG92_RS04885	EC391_RS06770	EC390_RS15965	EGM63_RS01885	EGM64_RS07720	EGM60_RS04615	EGA31_RS13735
921	13	TetR/AcrR family transcriptional regulator	GCF_000007865	MAP_RS04720	0		MAP_RS04720	MAP4_RS14585	RC58_RS14540	RE97_RS14565	A0V42_RS04740	CEP84_RS21735	CEG92_RS04890	EC391_RS06765	EC390_RS15970	EGM63_RS01880	EGM64_RS07725	EGM60_RS04620	EGA31_RS13730
922	13	hypothetical protein	GCF_000007865	MAP_RS04725	0		MAP_RS04725	MAP4_RS14580	RC58_RS14535	RE97_RS14560	A0V42_RS04745	CEP84_RS21730	CEG92_RS04895	EC391_RS06760	EC390_RS15975	EGM63_RS01875	EGM64_RS07730	EGM60_RS04625	EGA31_RS13725
923	13	peptidase M42	GCF_000007865	MAP_RS04730	0		MAP_RS04730	MAP4_RS14575	RC58_RS14530	RE97_RS14555	A0V42_RS04750	CEP84_RS21725	CEG92_RS04900	EC391_RS06755	EC390_RS15980	EGM63_RS01870	EGM64_RS07735	EGM60_RS04630	EGA31_RS13720
925	13	SIS domain-containing protein	GCF_000007865	MAP_RS04740	0		MAP_RS04740	MAP4_RS14565	RC58_RS14520	RE97_RS14545	A0V42_RS04760	CEP84_RS21715	CEG92_RS04910	EC391_RS06745	EC390_RS15990	EGM63_RS01860	EGM64_RS07745	EGM60_RS04640	EGA31_RS13710
926	13	histidinol phosphate phosphatase	GCF_000007865	MAP_RS04745	0		MAP_RS04745	MAP4_RS14560	RC58_RS14515	RE97_RS14540	A0V42_RS04765	CEP84_RS21710	CEG92_RS04915	EC391_RS06740	EC390_RS15995	EGM63_RS01855	EGM64_RS07750	EGM60_RS04645	EGA31_RS13705
927	13	GNAT family N-acetyltransferase	GCF_000007865	MAP_RS04750	0		MAP_RS04750	MAP4_RS14555	RC58_RS14510	RE97_RS14535	A0V42_RS04770	CEP84_RS21705	CEG92_RS04920	EC391_RS06735	EC390_RS16000	EGM63_RS01850	EGM64_RS07755	EGM60_RS04650	EGA31_RS13700
928	13	hypothetical protein	GCF_000007865	MAP_RS04755	0		MAP_RS04755	MAP4_RS14550	RC58_RS14505	RE97_RS14530	A0V42_RS04775	CEP84_RS21700	CEG92_RS04925	EC391_RS06730	EC390_RS16005	EGM63_RS01845	EGM64_RS07760	EGM60_RS04655	EGA31_RS13695
929	13	hypothetical protein	GCF_000007865	MAP_RS04760	0		MAP_RS04760	MAP4_RS14545	RC58_RS14500	RE97_RS14525	A0V42_RS04780	CEP84_RS21695	CEG92_RS04930	EC391_RS06725	EC390_RS16010	EGM63_RS01840	EGM64_RS07765	EGM60_RS04660	EGA31_RS13690
930	13	alpha-ketoglutarate-dependent dioxygenase AlkB	GCF_000007865	MAP_RS04765	0		MAP_RS04765	MAP4_RS14540	RC58_RS14495	RE97_RS14520	A0V42_RS04785	CEP84_RS21690	CEG92_RS04935	EC391_RS06720	EC390_RS16015	EGM63_RS01835	EGM64_RS07770	EGM60_RS04665	EGA31_RS13685
931	13	arginine deiminase	GCF_000007865	MAP_RS04770	0		MAP_RS04770	MAP4_RS14535	RC58_RS14490	RE97_RS14515	A0V42_RS04790	CEP84_RS21685	CEG92_RS04940	EC391_RS06715	EC390_RS16020	EGM63_RS01830	EGM64_RS07775	EGM60_RS04670	EGA31_RS13680
932	13	phospholipid carrier-dependent glycosyltransferase	GCF_000007865	MAP_RS04775	0		MAP_RS04775	MAP4_RS14530	RC58_RS14485	RE97_RS14510	A0V42_RS04795	CEP84_RS21680	CEG92_RS04945	EC391_RS06710	EC390_RS16025	EGM63_RS01825	EGM64_RS07780	EGM60_RS04675	EGA31_RS13675
933	13	16S rRNA (cytidine(1402)-2'-O)-methyltransferase	GCF_000007865	MAP_RS04780	0		MAP_RS04780	MAP4_RS14525	RC58_RS14480	RE97_RS14505	A0V42_RS04800	CEP84_RS21675	CEG92_RS04950	EC391_RS06705	EC390_RS16030	EGM63_RS01820	EGM64_RS07785	EGM60_RS04680	EGA31_RS13670
935	13	RNA polymerase sigma-70 factor	GCF_000007865	MAP_RS04790	0		MAP_RS04790	MAP4_RS14515	RC58_RS14470	RE97_RS14495	A0V42_RS04810	CEP84_RS21665	CEG92_RS04960	EC391_RS06695	EC390_RS16040	EGM63_RS01810	EGM64_RS07795	EGM60_RS04690	EGA31_RS13660
936	13	dehydrogenase	GCF_000007865	MAP_RS04795	0		MAP_RS04795	MAP4_RS14510	RC58_RS14465	RE97_RS14490	A0V42_RS04815	CEP84_RS21660	CEG92_RS04965	EC391_RS06690	EC390_RS16045	EGM63_RS01805	EGM64_RS07800	EGM60_RS04695	EGA31_RS13655
937	13	hypothetical protein	GCF_000007865	MAP_RS04800	0		MAP_RS04800	MAP4_RS14505	RC58_RS14460	RE97_RS14485	A0V42_RS04820	CEP84_RS21655	CEG92_RS04970	EC391_RS06685	EC390_RS16050	EGM63_RS01800	EGM64_RS07805	EGM60_RS04700	EGA31_RS13650
939	13	FkbM family methyltransferase	GCF_000007865	MAP_RS04810	0		MAP_RS04810	MAP4_RS14495	RC58_RS14450	RE97_RS14475	A0V42_RS04830	CEP84_RS21645	CEG92_RS04980	EC391_RS06675	EC390_RS16060	EGM63_RS01790	EGM64_RS07815	EGM60_RS04710	EGA31_RS13640
940	13	hypothetical protein	GCF_000007865	MAP_RS04815	0		MAP_RS04815	MAP4_RS14490	RC58_RS14445	RE97_RS14470	A0V42_RS04835	CEP84_RS21640	CEG92_RS04985	EC391_RS06670	EC390_RS16065	EGM63_RS01785	EGM64_RS07820	EGM60_RS04715	EGA31_RS13635
941	13	chain-length determining protein	GCF_000007865	MAP_RS04820	0		MAP_RS04820	MAP4_RS14485	RC58_RS14440	RE97_RS14465	A0V42_RS04840	CEP84_RS21635	CEG92_RS04990	EC391_RS06665	EC390_RS16070	EGM63_RS01780	EGM64_RS07825	EGM60_RS04720	EGA31_RS13630
942	13	O-antigen ligase domain-containing protein	GCF_000007865	MAP_RS04825	0		MAP_RS04825	MAP4_RS14480	RC58_RS14435	RE97_RS14460	A0V42_RS04845	CEP84_RS21630	CEG92_RS04995	EC391_RS06660	EC390_RS16075	EGM63_RS01775	EGM64_RS07830	EGM60_RS04725	EGA31_RS13625
943	13	glycosyl transferase family 1	GCF_000007865	MAP_RS04830	0		MAP_RS04830	MAP4_RS14475	RC58_RS14430	RE97_RS14455	A0V42_RS04850	CEP84_RS21625	CEG92_RS05000	EC391_RS06655	EC390_RS16080	EGM63_RS01770	EGM64_RS07835	EGM60_RS04730	EGA31_RS13620
944	13	aldo/keto reductase	GCF_000007865	MAP_RS04835	0		MAP_RS04835	MAP4_RS14470	RC58_RS14425	RE97_RS14450	A0V42_RS04855	CEP84_RS21620	CEG92_RS05005	EC391_RS06650	EC390_RS16085	EGM63_RS01765	EGM64_RS07840	EGM60_RS04735	EGA31_RS13615
945	13	GMC family oxidoreductase	GCF_000007865	MAP_RS04840	0		MAP_RS04840	MAP4_RS14465	RC58_RS14420	RE97_RS14445	A0V42_RS04860	CEP84_RS21615	CEG92_RS05010	EC391_RS06645	EC390_RS16090	EGM63_RS01760	EGM64_RS07845	EGM60_RS04740	EGA31_RS13610
946	13	hypothetical protein	GCF_000007865	MAP_RS04845	0		MAP_RS04845	MAP4_RS14460	RC58_RS14415	RE97_RS14440	A0V42_RS04865	CEP84_RS21610	CEG92_RS05015	EC391_RS06640	EC390_RS16095	EGM63_RS01755	EGM64_RS07850	EGM60_RS04745	EGA31_RS13605
947	13	gfo/Idh/MocA family oxidoreductase	GCF_000007865	MAP_RS04850	0		MAP_RS04850	MAP4_RS14455	RC58_RS14410	RE97_RS14435	A0V42_RS04870	CEP84_RS21605	CEG92_RS05020	EC391_RS06635	EC390_RS16100	EGM63_RS01750	EGM64_RS07855	EGM60_RS04750	EGA31_RS13600
948	13	polysaccharide biosynthesis protein	GCF_000007865	MAP_RS04855	0		MAP_RS04855	MAP4_RS14450	RC58_RS14405	RE97_RS14430	A0V42_RS04875	CEP84_RS21600	CEG92_RS05025	EC391_RS06630	EC390_RS16105	EGM63_RS01745	EGM64_RS07860	EGM60_RS04755	EGA31_RS13595
949	13	hypothetical protein	GCF_000007865	MAP_RS04860	0		MAP_RS04860	MAP4_RS14445	RC58_RS14400	RE97_RS14425	A0V42_RS04880	CEP84_RS21595	CEG92_RS05030	EC391_RS06625	EC390_RS16110	EGM63_RS01740	EGM64_RS07865	EGM60_RS04760	EGA31_RS13590
950	13	hypothetical protein	GCF_000007865	MAP_RS04865	0		MAP_RS04865	MAP4_RS14440	RC58_RS14395	RE97_RS14420	A0V42_RS04885	CEP84_RS21590	CEG92_RS05035	EC391_RS06620	EC390_RS16115	EGM63_RS01735	EGM64_RS07870	EGM60_RS04765	EGA31_RS13585
951	13	glycosyl transferase family 1	GCF_000007865	MAP_RS04870	0		MAP_RS04870	MAP4_RS14435	RC58_RS14390	RE97_RS14415	A0V42_RS04890	CEP84_RS21585	CEG92_RS05040	EC391_RS06615	EC390_RS16120	EGM63_RS01730	EGM64_RS07875	EGM60_RS04770	EGA31_RS13580
952	13	teichoic acid transporter	GCF_000007865	MAP_RS04875	0		MAP_RS04875	MAP4_RS14430	RC58_RS14385	RE97_RS14410	A0V42_RS04895	CEP84_RS21580	CEG92_RS05045	EC391_RS06610	EC390_RS16125	EGM63_RS01725	EGM64_RS07880	EGM60_RS04775	EGA31_RS13575
953	13	sugar transferase	GCF_000007865	MAP_RS04880	0		MAP_RS04880	MAP4_RS14425	RC58_RS14380	RE97_RS14405	A0V42_RS04900	CEP84_RS21575	CEG92_RS05050	EC391_RS06605	EC390_RS16130	EGM63_RS01720	EGM64_RS07885	EGM60_RS04780	EGA31_RS13570
955	13	PPE family protein	GCF_000007865	MAP_RS04890	0		MAP_RS04890	MAP4_RS14415	RC58_RS14370	RE97_RS14395	A0V42_RS04910	CEP84_RS21565	CEG92_RS05060	EC391_RS06595	EC390_RS16140	EGM63_RS01710	EGM64_RS07895	EGM60_RS04790	EGA31_RS13560
958	13	TetR/AcrR family transcriptional regulator	GCF_000007865	MAP_RS04905	0		MAP_RS04905	MAP4_RS14395	RC58_RS14350	RE97_RS14380	A0V42_RS04925	CEP84_RS21545	CEG92_RS05075	EC391_RS06575	EC390_RS16160	EGM63_RS01690	EGM64_RS07915	EGM60_RS04810	EGA31_RS13550
959	13	hypothetical protein	GCF_000007865	MAP_RS04910	0		MAP_RS04910	MAP4_RS14390	RC58_RS14345	RE97_RS14375	A0V42_RS04930	CEP84_RS21540	CEG92_RS05080	EC391_RS06570	EC390_RS16165	EGM63_RS01685	EGM64_RS07920	EGM60_RS04815	EGA31_RS13545
960	13	polysaccharide deacetylase family protein	GCF_000007865	MAP_RS04915	0		MAP_RS04915	MAP4_RS14385	RC58_RS14340	RE97_RS14370	A0V42_RS04935	CEP84_RS21535	CEG92_RS05085	EC391_RS06565	EC390_RS16170	EGM63_RS01680	EGM64_RS07925	EGM60_RS04820	EGA31_RS13540
961	13	PAS domain-containing protein	GCF_000007865	MAP_RS04920	0		MAP_RS04920	MAP4_RS14380	RC58_RS14335	RE97_RS14365	A0V42_RS04940	CEP84_RS21530	CEG92_RS05090	EC391_RS06560	EC390_RS16175	EGM63_RS01675	EGM64_RS07930	EGM60_RS04825	EGA31_RS13535
962	13	methionine--tRNA ligase	GCF_000007865	MAP_RS04925	0		MAP_RS04925	MAP4_RS14375	RC58_RS14330	RE97_RS14360	A0V42_RS04945	CEP84_RS21525	CEG92_RS05095	EC391_RS06555	EC390_RS16180	EGM63_RS01670	EGM64_RS07935	EGM60_RS04830	EGA31_RS13530
963	13	YchF/TatD family DNA exonuclease	GCF_000007865	MAP_RS04930	0		MAP_RS04930	MAP4_RS14370	RC58_RS14325	RE97_RS14355	A0V42_RS04950	CEP84_RS21520	CEG92_RS05100	EC391_RS06550	EC390_RS16185	EGM63_RS01665	EGM64_RS07940	EGM60_RS04835	EGA31_RS13525
964	13	resuscitation-promoting factor	GCF_000007865	MAP_RS04935	0		MAP_RS04935	MAP4_RS14365	RC58_RS14320	RE97_RS14350	A0V42_RS04955	CEP84_RS21515	CEG92_RS05105	EC391_RS06545	EC390_RS16190	EGM63_RS01660	EGM64_RS07945	EGM60_RS04840	EGA31_RS13520
965	13	ribosomal RNA small subunit methyltransferase A	GCF_000007865	MAP_RS04940	0		MAP_RS04940	MAP4_RS14360	RC58_RS14315	RE97_RS14345	A0V42_RS04960	CEP84_RS21510	CEG92_RS05110	EC391_RS06540	EC390_RS16195	EGM63_RS01655	EGM64_RS07950	EGM60_RS04845	EGA31_RS13515
968	13	peptidyl-tRNA hydrolase	GCF_000007865	MAP_RS04955	0		MAP_RS04955	MAP4_RS14345	RC58_RS14300	RE97_RS14330	A0V42_RS04975	CEP84_RS21490	CEG92_RS05130	EC391_RS06520	EC390_RS16215	EGM63_RS01635	EGM64_RS07970	EGM60_RS04865	EGA31_RS13495
969	13	50S ribosomal protein L25	GCF_000007865	MAP_RS04960	0		MAP_RS04960	MAP4_RS14340	RC58_RS14295	RE97_RS14325	A0V42_RS04980	CEP84_RS21485	CEG92_RS05135	EC391_RS06515	EC390_RS16220	EGM63_RS01630	EGM64_RS07975	EGM60_RS04870	EGA31_RS13490
970	13	KR domain-containing protein	GCF_000007865	MAP_RS04965	0		MAP_RS04965	MAP4_RS14335	RC58_RS14290	RE97_RS14320	A0V42_RS04985	CEP84_RS21480	CEG92_RS05140	EC391_RS06510	EC390_RS16225	EGM63_RS01625	EGM64_RS07980	EGM60_RS04875	EGA31_RS13485
971	13	hypothetical protein	GCF_000007865	MAP_RS04970	0		MAP_RS04970	MAP4_RS14330	RC58_RS14285	RE97_RS14315	A0V42_RS04990	CEP84_RS21475	CEG92_RS05145	EC391_RS06505	EC390_RS16230	EGM63_RS01620	EGM64_RS07985	EGM60_RS04880	EGA31_RS13480
972	13	arsenate reductase (glutaredoxin)	GCF_000007865	MAP_RS04975	0		MAP_RS04975	MAP4_RS14325	RC58_RS14280	RE97_RS14310	A0V42_RS04995	CEP84_RS21470	CEG92_RS05150	EC391_RS06500	EC390_RS16235	EGM63_RS01615	EGM64_RS07990	EGM60_RS04885	EGA31_RS13475
973	13	ribose-phosphate diphosphokinase	GCF_000007865	MAP_RS04980	0		MAP_RS04980	MAP4_RS14320	RC58_RS14275	RE97_RS14305	A0V42_RS05000	CEP84_RS21465	CEG92_RS05155	EC391_RS06495	EC390_RS16240	EGM63_RS01610	EGM64_RS07995	EGM60_RS04890	EGA31_RS13470
974	13	bifunctional UDP-N-acetylglucosamine diphosphorylase/glucosamine-1-phosphate N-acetyltransferase GlmU	GCF_000007865	MAP_RS04985	0		MAP_RS04985	MAP4_RS14315	RC58_RS14270	RE97_RS14300	A0V42_RS05005	CEP84_RS21460	CEG92_RS05160	EC391_RS06490	EC390_RS16245	EGM63_RS01605	EGM64_RS08000	EGM60_RS04895	EGA31_RS13465
975	13	TetR/AcrR family transcriptional regulator	GCF_000835225	RC58_RS14260	0		MAP_RS04995	MAP4_RS14305	RC58_RS14260	RE97_RS14290	A0V42_RS05015	CEP84_RS21450	CEG92_RS05170	EC391_RS06480	EC390_RS16255	EGM63_RS01595	EGM64_RS08010	EGM60_RS04905	EGA31_RS13455
976	13	diaminopimelate decarboxylase	GCF_000007865	MAP_RS05000	0		MAP_RS05000	MAP4_RS14300	RC58_RS14255	RE97_RS14285	A0V42_RS05020	CEP84_RS21445	CEG92_RS05175	EC391_RS06475	EC390_RS16260	EGM63_RS01590	EGM64_RS08015	EGM60_RS04910	EGA31_RS13450
977	13	transcription-repair coupling factor	GCF_000007865	MAP_RS05005	0		MAP_RS05005	MAP4_RS14295	RC58_RS14250	RE97_RS14280	A0V42_RS05025	CEP84_RS21440	CEG92_RS05180	EC391_RS06470	EC390_RS16265	EGM63_RS01585	EGM64_RS08020	EGM60_RS04915	EGA31_RS13445
978	13	nucleoside triphosphate pyrophosphohydrolase	GCF_000007865	MAP_RS05010	0		MAP_RS05010	MAP4_RS14290	RC58_RS14245	RE97_RS14275	A0V42_RS05030	CEP84_RS21435	CEG92_RS05185	EC391_RS06465	EC390_RS16270	EGM63_RS01580	EGM64_RS08025	EGM60_RS04920	EGA31_RS13440
979	13	hypothetical protein	GCF_000007865	MAP_RS05015	0		MAP_RS05015	MAP4_RS14285	RC58_RS14240	RE97_RS14270	A0V42_RS05035	CEP84_RS21430	CEG92_RS05190	EC391_RS06460	EC390_RS16275	EGM63_RS01575	EGM64_RS08030	EGM60_RS04925	EGA31_RS13435
980	13	enolase	GCF_000007865	MAP_RS05020	0		MAP_RS05020	MAP4_RS14280	RC58_RS14235	RE97_RS14265	A0V42_RS05040	CEP84_RS21425	CEG92_RS05195	EC391_RS06455	EC390_RS16280	EGM63_RS01570	EGM64_RS08035	EGM60_RS04930	EGA31_RS13430
981	13	septation inhibitor protein	GCF_000007865	MAP_RS05025	0		MAP_RS05025	MAP4_RS14275	RC58_RS14230	RE97_RS14260	A0V42_RS05045	CEP84_RS21420	CEG92_RS05200	EC391_RS06450	EC390_RS16285	EGM63_RS01565	EGM64_RS08040	EGM60_RS04935	EGA31_RS13425
982	13	DUF501 domain-containing protein	GCF_000007865	MAP_RS05030	0		MAP_RS05030	MAP4_RS14270	RC58_RS14225	RE97_RS14255	A0V42_RS05050	CEP84_RS21415	CEG92_RS05205	EC391_RS06445	EC390_RS16290	EGM63_RS01560	EGM64_RS08045	EGM60_RS04940	EGA31_RS13420
983	13	Ppx/GppA family phosphatase	GCF_000007865	MAP_RS05035	0		MAP_RS05035	MAP4_RS14265	RC58_RS14220	RE97_RS14250	A0V42_RS05055	CEP84_RS21410	CEG92_RS05210	EC391_RS06440	EC390_RS16295	EGM63_RS01555	EGM64_RS08050	EGM60_RS04945	EGA31_RS13415
984	13	hypothetical protein	GCF_000007865	MAP_RS05040	0		MAP_RS05040	MAP4_RS14260	RC58_RS14215	RE97_RS14245	A0V42_RS05060	CEP84_RS21405	CEG92_RS05215	EC391_RS06435	EC390_RS16300	EGM63_RS01550	EGM64_RS08055	EGM60_RS04950	EGA31_RS13410
986	13	sensor histidine kinase KdpD	GCF_000007865	MAP_RS05050	0		MAP_RS05050	MAP4_RS14250	RC58_RS14205	RE97_RS14235	A0V42_RS05070	CEP84_RS21395	CEG92_RS05225	EC391_RS06425	EC390_RS16310	EGM63_RS01540	EGM64_RS08065	EGM60_RS04960	EGA31_RS13400
987	13	potassium-transporting ATPase subunit C	GCF_000007865	MAP_RS05055	0		MAP_RS05055	MAP4_RS14245	RC58_RS14200	RE97_RS14230	A0V42_RS05075	CEP84_RS21390	CEG92_RS05230	EC391_RS06420	EC390_RS16315	EGM63_RS01535	EGM64_RS08070	EGM60_RS04965	EGA31_RS13395
988	13	potassium-transporting ATPase A chain	GCF_000007865	MAP_RS05065	0		MAP_RS05065	MAP4_RS14235	RC58_RS14190	RE97_RS14220	A0V42_RS05085	CEP84_RS21380	CEG92_RS05240	EC391_RS06410	EC390_RS16325	EGM63_RS01525	EGM64_RS08080	EGM60_RS04975	EGA31_RS13385
989	13	hypothetical protein	GCF_000007865	MAP_RS05070	0		MAP_RS05070	MAP4_RS14230	RC58_RS14185	RE97_RS14215	A0V42_RS05090	CEP84_RS21375	CEG92_RS05245	EC391_RS06405	EC390_RS16330	EGM63_RS01520	EGM64_RS08085	EGM60_RS04980	EGA31_RS13380
990	13	hypothetical protein	GCF_000007865	MAP_RS05075	0		MAP_RS05075	MAP4_RS14225	RC58_RS14180	RE97_RS14210	A0V42_RS05095	CEP84_RS21370	CEG92_RS05250	EC391_RS06400	EC390_RS16335	EGM63_RS01515	EGM64_RS08090	EGM60_RS04985	EGA31_RS13375
991	13	sensor histidine kinase	GCF_000007865	MAP_RS05080	0		MAP_RS05080	MAP4_RS14220	RC58_RS14175	RE97_RS14205	A0V42_RS05100	CEP84_RS21365	CEG92_RS05255	EC391_RS06395	EC390_RS16340	EGM63_RS01510	EGM64_RS08095	EGM60_RS04990	EGA31_RS13370
992	13	DNA-binding response regulator	GCF_000007865	MAP_RS05085	0		MAP_RS05085	MAP4_RS14215	RC58_RS14170	RE97_RS14200	A0V42_RS05105	CEP84_RS21360	CEG92_RS05260	EC391_RS06390	EC390_RS16345	EGM63_RS01505	EGM64_RS08100	EGM60_RS04995	EGA31_RS13365
993	13	hypothetical protein	GCF_000007865	MAP_RS05090	0		MAP_RS05090	MAP4_RS14210	RC58_RS14165	RE97_RS22900	A0V42_RS05110	CEP84_RS21355	CEG92_RS05265	EC391_RS06385	EC390_RS16350	EGM63_RS01500	EGM64_RS08105	EGM60_RS05000	EGA31_RS13360
995	13	PPE family protein	GCF_000007865	MAP_RS05100	0		MAP_RS05100	MAP4_RS14200	RC58_RS14160	RE97_RS14185	A0V42_RS05120	CEP84_RS21345	CEG92_RS05275	EC391_RS06375	EC390_RS16360	EGM63_RS01490	EGM64_RS08115	EGM60_RS05010	EGA31_RS13350
996	13	class I SAM-dependent methyltransferase	GCF_000007865	MAP_RS05120	0		MAP_RS05120	MAP4_RS14180	RC58_RS14140	RE97_RS14165	A0V42_RS05140	CEP84_RS21330	CEG92_RS05290	EC391_RS06360	EC390_RS16375	EGM63_RS01475	EGM64_RS08130	EGM60_RS05025	EGA31_RS13335
997	13	hypothetical protein	GCF_000007865	MAP_RS05125	0		MAP_RS05125	MAP4_RS14175	RC58_RS14135	RE97_RS14160	A0V42_RS05145	CEP84_RS21325	CEG92_RS05295	EC391_RS06355	EC390_RS16380	EGM63_RS01470	EGM64_RS08135	EGM60_RS05030	EGA31_RS13330
998	13	DUF427 domain-containing protein	GCF_000007865	MAP_RS05130	0		MAP_RS05130	MAP4_RS14170	RC58_RS14130	RE97_RS14155	A0V42_RS05150	CEP84_RS21320	CEG92_RS05300	EC391_RS06350	EC390_RS16385	EGM63_RS01465	EGM64_RS08140	EGM60_RS05035	EGA31_RS13325
999	13	YncE family protein	GCF_000007865	MAP_RS05135	0		MAP_RS05135	MAP4_RS14165	RC58_RS14125	RE97_RS14150	A0V42_RS05155	CEP84_RS21315	CEG92_RS05305	EC391_RS06345	EC390_RS16390	EGM63_RS01460	EGM64_RS08145	EGM60_RS05040	EGA31_RS13320
1001	13	SRPBCC family protein	GCF_000007865	MAP_RS05145	0		MAP_RS05145	MAP4_RS14155	RC58_RS14115	RE97_RS14140	A0V42_RS05165	CEP84_RS21305	CEG92_RS05315	EC391_RS06335	EC390_RS16400	EGM63_RS01450	EGM64_RS08155	EGM60_RS05050	EGA31_RS13310
1002	13	class II glutamine amidotransferase	GCF_000007865	MAP_RS05150	0		MAP_RS05150	MAP4_RS14150	RC58_RS14110	RE97_RS14135	A0V42_RS05170	CEP84_RS21300	CEG92_RS05320	EC391_RS06330	EC390_RS16405	EGM63_RS01445	EGM64_RS08160	EGM60_RS05055	EGA31_RS13305
1003	13	hypothetical protein	GCF_000007865	MAP_RS05155	0		MAP_RS05155	MAP4_RS14145	RC58_RS14105	RE97_RS14130	A0V42_RS05175	CEP84_RS21295	CEG92_RS05325	EC391_RS06325	EC390_RS16410	EGM63_RS01440	EGM64_RS08165	EGM60_RS05060	EGA31_RS13300
1004	13	esterase	GCF_000007865	MAP_RS05160	0		MAP_RS05160	MAP4_RS14140	RC58_RS14100	RE97_RS14125	A0V42_RS05180	CEP84_RS21290	CEG92_RS05330	EC391_RS06320	EC390_RS16415	EGM63_RS01435	EGM64_RS08170	EGM60_RS05065	EGA31_RS13295
1006	13	cysteine dioxygenase	GCF_000007865	MAP_RS05170	0		MAP_RS05170	MAP4_RS14130	RC58_RS14090	RE97_RS14115	A0V42_RS05190	CEP84_RS21280	CEG92_RS05340	EC391_RS06310	EC390_RS16425	EGM63_RS01425	EGM64_RS08180	EGM60_RS05075	EGA31_RS13285
1007	13	hypothetical protein	GCF_000007865	MAP_RS05175	0		MAP_RS05175	MAP4_RS14125	RC58_RS14085	RE97_RS14110	A0V42_RS05195	CEP84_RS21275	CEG92_RS05345	EC391_RS06305	EC390_RS16430	EGM63_RS01420	EGM64_RS08185	EGM60_RS05080	EGA31_RS13280
1008	13	membrane protein	GCF_000007865	MAP_RS05180	0		MAP_RS05180	MAP4_RS14120	RC58_RS14080	RE97_RS14105	A0V42_RS05200	CEP84_RS21270	CEG92_RS05350	EC391_RS06300	EC390_RS16435	EGM63_RS01415	EGM64_RS08190	EGM60_RS05085	EGA31_RS13275
1009	13	enoyl-CoA hydratase	GCF_000007865	MAP_RS05185	0		MAP_RS05185	MAP4_RS14115	RC58_RS14075	RE97_RS14100	A0V42_RS05205	CEP84_RS21265	CEG92_RS05355	EC391_RS06295	EC390_RS16440	EGM63_RS01410	EGM64_RS08195	EGM60_RS05090	EGA31_RS13270
1010	13	enoyl-CoA hydratase/isomerase family protein	GCF_000007865	MAP_RS05190	0		MAP_RS05190	MAP4_RS14110	RC58_RS14070	RE97_RS14095	A0V42_RS05210	CEP84_RS21260	CEG92_RS05360	EC391_RS06290	EC390_RS16445	EGM63_RS01405	EGM64_RS08200	EGM60_RS05095	EGA31_RS13265
1011	13	membrane protein	GCF_000007865	MAP_RS05195	0		MAP_RS05195	MAP4_RS14105	RC58_RS14065	RE97_RS14090	A0V42_RS05215	CEP84_RS21255	CEG92_RS05365	EC391_RS06285	EC390_RS16450	EGM63_RS01400	EGM64_RS08205	EGM60_RS05100	EGA31_RS13260
1013	13	alpha/beta hydrolase	GCF_000007865	MAP_RS05210	0		MAP_RS05210	MAP4_RS14090	RC58_RS14050	RE97_RS14075	A0V42_RS05230	CEP84_RS21240	CEG92_RS05380	EC391_RS06270	EC390_RS16465	EGM63_RS01385	EGM64_RS08220	EGM60_RS05115	EGA31_RS13245
1014	13	cystathionine beta-synthase	GCF_000007865	MAP_RS05215	0		MAP_RS05215	MAP4_RS14085	RC58_RS14045	RE97_RS14070	A0V42_RS05235	CEP84_RS21235	CEG92_RS05385	EC391_RS06265	EC390_RS16470	EGM63_RS01380	EGM64_RS08225	EGM60_RS05120	EGA31_RS13240
1015	13	RDD family protein	GCF_000007865	MAP_RS05220	0		MAP_RS05220	MAP4_RS14080	RC58_RS14040	RE97_RS14065	A0V42_RS05240	CEP84_RS21230	CEG92_RS05390	EC391_RS06260	EC390_RS16475	EGM63_RS01375	EGM64_RS08230	EGM60_RS05125	EGA31_RS13235
1016	13	cystathionine gamma-synthase	GCF_000007865	MAP_RS05225	0		MAP_RS05225	MAP4_RS14075	RC58_RS14035	RE97_RS14060	A0V42_RS05245	CEP84_RS21225	CEG92_RS05395	EC391_RS06255	EC390_RS16480	EGM63_RS01370	EGM64_RS08235	EGM60_RS05130	EGA31_RS13230
1017	13	transcription elongation factor GreA	GCF_000007865	MAP_RS05230	0		MAP_RS05230	MAP4_RS14070	RC58_RS14030	RE97_RS14055	A0V42_RS05250	CEP84_RS21220	CEG92_RS05400	EC391_RS06250	EC390_RS16485	EGM63_RS01365	EGM64_RS08240	EGM60_RS05135	EGA31_RS13225
1018	13	DUF4307 domain-containing protein	GCF_000007865	MAP_RS05235	0		MAP_RS05235	MAP4_RS14065	RC58_RS14025	RE97_RS14050	A0V42_RS05255	CEP84_RS21215	CEG92_RS05405	EC391_RS06245	EC390_RS16490	EGM63_RS01360	EGM64_RS08245	EGM60_RS05140	EGA31_RS13220
1019	13	mycothiol conjugate amidase Mca	GCF_000835225	RC58_RS14020	0		MAP_RS05240	MAP4_RS14060	RC58_RS14020	RE97_RS14045	A0V42_RS05260	CEP84_RS21210	CEG92_RS05410	EC391_RS06240	EC390_RS16495	EGM63_RS01355	EGM64_RS08250	EGM60_RS05145	EGA31_RS13215
1020	13	YebC/PmpR family DNA-binding transcriptional regulator	GCF_000007865	MAP_RS05245	0		MAP_RS05245	MAP4_RS14055	RC58_RS14015	RE97_RS14040	A0V42_RS05265	CEP84_RS21200	CEG92_RS05415	EC391_RS06230	EC390_RS16505	EGM63_RS01345	EGM64_RS08260	EGM60_RS05155	EGA31_RS13205
1021	13	spermidine synthase	GCF_000390085	MAP4_RS14050	0		MAP_RS05250	MAP4_RS14050	RC58_RS14010	RE97_RS14035	A0V42_RS05270	CEP84_RS21195	CEG92_RS05420	EC391_RS06225	EC390_RS16510	EGM63_RS01340	EGM64_RS08265	EGM60_RS05160	EGA31_RS13200
1022	13	DUF350 domain-containing protein	GCF_000007865	MAP_RS05255	0		MAP_RS05255	MAP4_RS14045	RC58_RS14005	RE97_RS14030	A0V42_RS05275	CEP84_RS21190	CEG92_RS05425	EC391_RS06220	EC390_RS16515	EGM63_RS01335	EGM64_RS08270	EGM60_RS05165	EGA31_RS13195
1024	13	DUF4247 domain-containing protein	GCF_000007865	MAP_RS05265	0		MAP_RS05265	MAP4_RS14035	RC58_RS13995	RE97_RS14020	A0V42_RS05285	CEP84_RS21175	CEG92_RS05435	EC391_RS06205	EC390_RS16530	EGM63_RS01320	EGM64_RS08285	EGM60_RS05180	EGA31_RS13180
1026	13	DUF4178 domain-containing protein	GCF_000007865	MAP_RS05275	0		MAP_RS05275	MAP4_RS14025	RC58_RS13985	RE97_RS14010	A0V42_RS05295	CEP84_RS21165	CEG92_RS05445	EC391_RS06195	EC390_RS16540	EGM63_RS01310	EGM64_RS08295	EGM60_RS05190	EGA31_RS13170
1027	13	crossover junction endodeoxyribonuclease RuvC	GCF_000007865	MAP_RS05280	0		MAP_RS05280	MAP4_RS14020	RC58_RS13980	RE97_RS14005	A0V42_RS05300	CEP84_RS21160	CEG92_RS05450	EC391_RS06190	EC390_RS16545	EGM63_RS01305	EGM64_RS08300	EGM60_RS05195	EGA31_RS13165
1030	13	hypothetical protein	GCF_000007865	MAP_RS05295	0		MAP_RS05295	MAP4_RS14005	RC58_RS13965	RE97_RS13990	A0V42_RS05315	CEP84_RS21145	CEG92_RS05465	EC391_RS06175	EC390_RS16560	EGM63_RS01290	EGM64_RS08315	EGM60_RS05210	EGA31_RS13150
1031	13	oxidoreductase	GCF_000007865	MAP_RS05300	0		MAP_RS05300	MAP4_RS14000	RC58_RS13960	RE97_RS13985	A0V42_RS05320	CEP84_RS21140	CEG92_RS05470	EC391_RS06170	EC390_RS16565	EGM63_RS01285	EGM64_RS08320	EGM60_RS05215	EGA31_RS13145
1032	13	4-aminobutyrate--2-oxoglutarate transaminase	GCF_000007865	MAP_RS05305	0		MAP_RS05305	MAP4_RS13995	RC58_RS13955	RE97_RS13980	A0V42_RS05325	CEP84_RS21135	CEG92_RS05475	EC391_RS06165	EC390_RS16570	EGM63_RS01280	EGM64_RS08325	EGM60_RS05220	EGA31_RS13140
1033	13	preprotein translocase subunit YajC	GCF_000007865	MAP_RS05310	0		MAP_RS05310	MAP4_RS13990	RC58_RS13950	RE97_RS13975	A0V42_RS05330	CEP84_RS21130	CEG92_RS05480	EC391_RS06160	EC390_RS16575	EGM63_RS01275	EGM64_RS08330	EGM60_RS05225	EGA31_RS13135
1036	13	hypothetical protein	GCF_000007865	MAP_RS05325	0		MAP_RS05325	MAP4_RS13975	RC58_RS13940	RE97_RS13960	A0V42_RS05345	CEP84_RS21115	CEG92_RS05495	EC391_RS06145	EC390_RS16590	EGM63_RS01260	EGM64_RS08345	EGM60_RS05240	EGA31_RS13120
1037	13	adenine phosphoribosyltransferase	GCF_000007865	MAP_RS05330	0		MAP_RS05330	MAP4_RS13970	RC58_RS13935	RE97_RS13955	A0V42_RS05350	CEP84_RS21110	CEG92_RS05500	EC391_RS06140	EC390_RS16595	EGM63_RS01255	EGM64_RS08350	EGM60_RS05245	EGA31_RS13115
1038	13	RelA/SpoT family protein	GCF_000007865	MAP_RS05335	0		MAP_RS05335	MAP4_RS13965	RC58_RS13930	RE97_RS13950	A0V42_RS05355	CEP84_RS21105	CEG92_RS05505	EC391_RS06135	EC390_RS16600	EGM63_RS01250	EGM64_RS08355	EGM60_RS05250	EGA31_RS13110
1041	13	peptidylprolyl isomerase	GCF_000007865	MAP_RS05350	0		MAP_RS05350	MAP4_RS13950	RC58_RS13920	RE97_RS13940	A0V42_RS05370	CEP84_RS21090	CEG92_RS05520	EC391_RS06120	EC390_RS16615	EGM63_RS01235	EGM64_RS08370	EGM60_RS05265	EGA31_RS13100
1042	13	MBL fold metallo-hydrolase	GCF_000007865	MAP_RS05355	0		MAP_RS05355	MAP4_RS13945	RC58_RS13915	RE97_RS13935	A0V42_RS05375	CEP84_RS21085	CEG92_RS05525	EC391_RS06115	EC390_RS16620	EGM63_RS01230	EGM64_RS08375	EGM60_RS05270	EGA31_RS13095
1043	13	histidine--tRNA ligase	GCF_000007865	MAP_RS05360	0		MAP_RS05360	MAP4_RS13940	RC58_RS13910	RE97_RS13930	A0V42_RS05380	CEP84_RS21080	CEG92_RS05530	EC391_RS06110	EC390_RS16625	EGM63_RS01225	EGM64_RS08380	EGM60_RS05275	EGA31_RS13090
1044	13	HNH endonuclease	GCF_000007865	MAP_RS05365	0	FN	MAP_RS05365	MAP4_RS13935	RC58_RS13905	RE97_RS13925	A0V42_RS05385	CEP84_RS21070	CEG92_RS05540	EC391_RS06100	EC390_RS16635	EGM63_RS01215	EGM64_RS08390	EGM60_RS05285	EGA31_RS13080
1046	13	radical SAM protein	GCF_000007865	MAP_RS05375	0		MAP_RS05375	MAP4_RS13925	RC58_RS13895	RE97_RS13915	A0V42_RS05395	CEP84_RS21060	CEG92_RS05550	EC391_RS06090	EC390_RS16645	EGM63_RS01205	EGM64_RS08400	EGM60_RS05295	EGA31_RS13075
1047	13	hypothetical protein	GCF_000007865	MAP_RS05380	0		MAP_RS05380	MAP4_RS13920	RC58_RS13890	RE97_RS13910	A0V42_RS05400	CEP84_RS21055	CEG92_RS05555	EC391_RS06085	EC390_RS16650	EGM63_RS01200	EGM64_RS08405	EGM60_RS05300	EGA31_RS13070
1048	13	hypothetical protein	GCF_000007865	MAP_RS05385	0		MAP_RS05385	MAP4_RS13915	RC58_RS13885	RE97_RS13905	A0V42_RS05405	CEP84_RS21050	CEG92_RS05560	EC391_RS06080	EC390_RS16655	EGM63_RS01195	EGM64_RS08410	EGM60_RS05305	EGA31_RS13065
1049	13	XRE family transcriptional regulator	GCF_000007865	MAP_RS05390	0		MAP_RS05390	MAP4_RS13910	RC58_RS13880	RE97_RS13900	A0V42_RS05410	CEP84_RS21045	CEG92_RS05565	EC391_RS06075	EC390_RS16660	EGM63_RS01190	EGM64_RS08415	EGM60_RS05310	EGA31_RS13060
1050	13	aldolase	GCF_000007865	MAP_RS05395	0		MAP_RS05395	MAP4_RS13905	RC58_RS13875	RE97_RS13895	A0V42_RS05415	CEP84_RS21040	CEG92_RS05570	EC391_RS06070	EC390_RS16665	EGM63_RS01185	EGM64_RS08420	EGM60_RS05315	EGA31_RS13055
1051	13	dihydrodipicolinate synthase family protein	GCF_000007865	MAP_RS05400	0		MAP_RS05400	MAP4_RS13900	RC58_RS13870	RE97_RS13890	A0V42_RS05420	CEP84_RS21035	CEG92_RS05575	EC391_RS06065	EC390_RS16670	EGM63_RS01180	EGM64_RS08425	EGM60_RS05320	EGA31_RS13050
1052	13	membrane protein	GCF_000007865	MAP_RS05405	0		MAP_RS05405	MAP4_RS13895	RC58_RS13865	RE97_RS13885	A0V42_RS05425	CEP84_RS21030	CEG92_RS05580	EC391_RS06060	EC390_RS16675	EGM63_RS01175	EGM64_RS08430	EGM60_RS05325	EGA31_RS13045
1053	13	SRPBCC family protein	GCF_000007865	MAP_RS05410	0		MAP_RS05410	MAP4_RS13890	RC58_RS13860	RE97_RS13880	A0V42_RS05430	CEP84_RS21025	CEG92_RS05585	EC391_RS06055	EC390_RS16680	EGM63_RS01170	EGM64_RS08435	EGM60_RS05330	EGA31_RS13040
1054	13	2-dehydropantoate 2-reductase	GCF_000007865	MAP_RS05415	0		MAP_RS05415	MAP4_RS13885	RC58_RS13855	RE97_RS13875	A0V42_RS05435	CEP84_RS21020	CEG92_RS05590	EC391_RS06050	EC390_RS16685	EGM63_RS01165	EGM64_RS08440	EGM60_RS05335	EGA31_RS13035
1055	13	aspartate--tRNA ligase	GCF_000007865	MAP_RS05420	0		MAP_RS05420	MAP4_RS13880	RC58_RS13850	RE97_RS13870	A0V42_RS05440	CEP84_RS21015	CEG92_RS05595	EC391_RS06045	EC390_RS16690	EGM63_RS01160	EGM64_RS08445	EGM60_RS05340	EGA31_RS13030
1056	13	hypothetical protein	GCF_000007865	MAP_RS22580	0		MAP_RS22580	MAP4_RS22805	RC58_RS22815	RE97_RS22880	A0V42_RS22520	CEP84_RS21010	CEG92_RS05600	EC391_RS06040	EC390_RS16695	EGM63_RS01155	EGM64_RS08450	EGM60_RS05345	EGA31_RS13025
1057	13	hypothetical protein	GCF_000007865	MAP_RS05430	0		MAP_RS05430	MAP4_RS13870	RC58_RS13840	RE97_RS13860	A0V42_RS05450	CEP84_RS21000	CEG92_RS05610	EC391_RS06030	EC390_RS16705	EGM63_RS01145	EGM64_RS08460	EGM60_RS05355	EGA31_RS13015
1058	13	hypothetical protein	GCF_000007865	MAP_RS05435	0		MAP_RS05435	MAP4_RS13865	RC58_RS13835	RE97_RS13855	A0V42_RS05455	CEP84_RS20995	CEG92_RS05615	EC391_RS06025	EC390_RS16710	EGM63_RS01140	EGM64_RS08465	EGM60_RS05360	EGA31_RS13010
1059	13	nitroreductase family deazaflavin-dependent oxidoreductase	GCF_000007865	MAP_RS05440	0		MAP_RS05440	MAP4_RS13860	RC58_RS13830	RE97_RS13850	A0V42_RS05460	CEP84_RS20990	CEG92_RS05620	EC391_RS06020	EC390_RS16715	EGM63_RS01135	EGM64_RS08470	EGM60_RS05365	EGA31_RS13005
1061	13	hypothetical protein	GCF_000007865	MAP_RS05450	0		MAP_RS05450	MAP4_RS13850	RC58_RS13820	RE97_RS13840	A0V42_RS05470	CEP84_RS20980	CEG92_RS05630	EC391_RS06010	EC390_RS16725	EGM63_RS01125	EGM64_RS08480	EGM60_RS05375	EGA31_RS12995
1062	13	transglutaminase family protein	GCF_000007865	MAP_RS05455	0		MAP_RS05455	MAP4_RS13845	RC58_RS13815	RE97_RS13835	A0V42_RS05475	CEP84_RS20975	CEG92_RS05635	EC391_RS06005	EC390_RS16730	EGM63_RS01120	EGM64_RS08485	EGM60_RS05380	EGA31_RS12990
1063	13	hypothetical protein	GCF_000007865	MAP_RS05460	0		MAP_RS05460	MAP4_RS13840	RC58_RS13810	RE97_RS13830	A0V42_RS05480	CEP84_RS20970	CEG92_RS05640	EC391_RS06000	EC390_RS16735	EGM63_RS01115	EGM64_RS08490	EGM60_RS05385	EGA31_RS12985
1064	13	hypothetical protein	GCF_000007865	MAP_RS05465	0		MAP_RS05465	MAP4_RS13835	RC58_RS13805	RE97_RS13825	A0V42_RS05485	CEP84_RS20965	CEG92_RS05645	EC391_RS05995	EC390_RS16740	EGM63_RS01110	EGM64_RS08495	EGM60_RS05390	EGA31_RS12980
1065	13	hypothetical protein	GCF_000007865	MAP_RS05470	0	FG-In	MAP_RS05470	MAP4_RS13830	RC58_RS13800	RE97_RS13820	A0V42_RS05490	CEP84_RS20960	CEG92_RS05650	EC391_RS05990	EC390_RS16745	EGM63_RS01105	EGM64_RS08500	EGM60_RS05395	EGA31_RS12975
1066	13	replication-associated recombination protein A	GCF_000007865	MAP_RS05475	0		MAP_RS05475	MAP4_RS13825	RC58_RS13795	RE97_RS13815	A0V42_RS05495	CEP84_RS20955	CEG92_RS05655	EC391_RS05985	EC390_RS16750	EGM63_RS01100	EGM64_RS08505	EGM60_RS05400	EGA31_RS12970
1067	13	hypothetical protein	GCF_000007865	MAP_RS05480	0		MAP_RS05480	MAP4_RS13820	RC58_RS13790	RE97_RS13810	A0V42_RS05500	CEP84_RS20950	CEG92_RS05660	EC391_RS05980	EC390_RS16755	EGM63_RS01095	EGM64_RS08510	EGM60_RS05405	EGA31_RS12965
1068	13	hypothetical protein	GCF_000007865	MAP_RS05490	0		MAP_RS05490	MAP4_RS13810	RC58_RS13780	RE97_RS13800	A0V42_RS05510	CEP84_RS20940	CEG92_RS05670	EC391_RS05970	EC390_RS16765	EGM63_RS01085	EGM64_RS08520	EGM60_RS05415	EGA31_RS12955
1069	13	alanine--tRNA ligase	GCF_000007865	MAP_RS05495	0		MAP_RS05495	MAP4_RS13805	RC58_RS13775	RE97_RS13795	A0V42_RS05515	CEP84_RS20935	CEG92_RS05675	EC391_RS05965	EC390_RS16770	EGM63_RS01080	EGM64_RS08525	EGM60_RS05420	EGA31_RS12950
1070	13	Holliday junction resolvase RuvX	GCF_000007865	MAP_RS05500	0		MAP_RS05500	MAP4_RS13800	RC58_RS13770	RE97_RS13790	A0V42_RS05520	CEP84_RS20930	CEG92_RS05680	EC391_RS05960	EC390_RS16775	EGM63_RS01075	EGM64_RS08530	EGM60_RS05425	EGA31_RS12945
1071	13	aminodeoxychorismate lyase	GCF_000007865	MAP_RS05505	0		MAP_RS05505	MAP4_RS13795	RC58_RS13765	RE97_RS13785	A0V42_RS05525	CEP84_RS20925	CEG92_RS05685	EC391_RS05955	EC390_RS16780	EGM63_RS01070	EGM64_RS08535	EGM60_RS05430	EGA31_RS12940
1072	13	shikimate dehydrogenase	GCF_000007865	MAP_RS05510	0		MAP_RS05510	MAP4_RS13790	RC58_RS13760	RE97_RS13780	A0V42_RS05530	CEP84_RS20920	CEG92_RS05690	EC391_RS05950	EC390_RS16785	EGM63_RS01065	EGM64_RS08540	EGM60_RS05435	EGA31_RS12935
1074	13	LLM class flavin-dependent oxidoreductase	GCF_000007865	MAP_RS05520	0		MAP_RS05520	MAP4_RS13780	RC58_RS13750	RE97_RS13770	A0V42_RS05540	CEP84_RS20910	CEG92_RS05700	EC391_RS05940	EC390_RS16795	EGM63_RS01055	EGM64_RS08550	EGM60_RS05445	EGA31_RS12925
1075	13	LLM class flavin-dependent oxidoreductase	GCF_000007865	MAP_RS05525	0		MAP_RS05525	MAP4_RS13775	RC58_RS13745	RE97_RS13765	A0V42_RS05545	CEP84_RS20905	CEG92_RS05705	EC391_RS05935	EC390_RS16800	EGM63_RS01050	EGM64_RS08555	EGM60_RS05450	EGA31_RS12920
1076	13	hypothetical protein	GCF_000007865	MAP_RS05530	0		MAP_RS05530	MAP4_RS13770	RC58_RS13740	RE97_RS13760	A0V42_RS05550	CEP84_RS20900	CEG92_RS05710	EC391_RS05930	EC390_RS16805	EGM63_RS01045	EGM64_RS08560	EGM60_RS05455	EGA31_RS12915
1078	13	peptide ABC transporter substrate-binding protein	GCF_000007865	MAP_RS05540	0		MAP_RS05540	MAP4_RS13760	RC58_RS13730	RE97_RS13750	A0V42_RS05560	CEP84_RS20890	CEG92_RS05720	EC391_RS05920	EC390_RS16815	EGM63_RS01035	EGM64_RS08570	EGM60_RS05465	EGA31_RS12905
1079	13	ABC transporter permease	GCF_000007865	MAP_RS05550	0		MAP_RS05550	MAP4_RS13750	RC58_RS13720	RE97_RS13740	A0V42_RS05570	CEP84_RS20880	CEG92_RS05730	EC391_RS05910	EC390_RS16825	EGM63_RS01025	EGM64_RS08580	EGM60_RS05475	EGA31_RS12895
1081	13	chorismate synthase	GCF_000007865	MAP_RS05560	0		MAP_RS05560	MAP4_RS13740	RC58_RS13710	RE97_RS13730	A0V42_RS05580	CEP84_RS20870	CEG92_RS05740	EC391_RS05900	EC390_RS16835	EGM63_RS01015	EGM64_RS08590	EGM60_RS05485	EGA31_RS12885
1082	13	shikimate kinase	GCF_000007865	MAP_RS05565	0		MAP_RS05565	MAP4_RS13735	RC58_RS13705	RE97_RS13725	A0V42_RS05585	CEP84_RS20865	CEG92_RS05745	EC391_RS05895	EC390_RS16840	EGM63_RS01010	EGM64_RS08595	EGM60_RS05490	EGA31_RS12880
1083	13	3-dehydroquinate synthase	GCF_000007865	MAP_RS05570	0		MAP_RS05570	MAP4_RS13730	RC58_RS13700	RE97_RS13720	A0V42_RS05590	CEP84_RS20860	CEG92_RS05750	EC391_RS05890	EC390_RS16845	EGM63_RS01005	EGM64_RS08600	EGM60_RS05495	EGA31_RS12875
1084	13	3-dehydroquinate dehydratase	GCF_000007865	MAP_RS05575	0		MAP_RS05575	MAP4_RS13725	RC58_RS13695	RE97_RS13715	A0V42_RS05595	CEP84_RS20855	CEG92_RS05755	EC391_RS05885	EC390_RS16850	EGM63_RS01000	EGM64_RS08605	EGM60_RS05500	EGA31_RS12870
1085	13	hypothetical protein	GCF_000007865	MAP_RS05580	0		MAP_RS05580	MAP4_RS13720	RC58_RS13690	RE97_RS13710	A0V42_RS05600	CEP84_RS20850	CEG92_RS05760	EC391_RS05880	EC390_RS16855	EGM63_RS00995	EGM64_RS08610	EGM60_RS05505	EGA31_RS12865
1086	13	aminopeptidase P family protein	GCF_000007865	MAP_RS05585	0		MAP_RS05585	MAP4_RS13715	RC58_RS13685	RE97_RS13705	A0V42_RS05605	CEP84_RS20845	CEG92_RS05765	EC391_RS05875	EC390_RS16860	EGM63_RS00990	EGM64_RS08615	EGM60_RS05510	EGA31_RS12860
1087	13	elongation factor P	GCF_000007865	MAP_RS05590	0		MAP_RS05590	MAP4_RS13710	RC58_RS13680	RE97_RS13700	A0V42_RS05610	CEP84_RS20840	CEG92_RS05770	EC391_RS05870	EC390_RS16865	EGM63_RS00985	EGM64_RS08620	EGM60_RS05515	EGA31_RS12855
1088	13	N utilization substance protein B	GCF_000007865	MAP_RS05595	0		MAP_RS05595	MAP4_RS13705	RC58_RS13675	RE97_RS13695	A0V42_RS05615	CEP84_RS20835	CEG92_RS05775	EC391_RS05865	EC390_RS16870	EGM63_RS00980	EGM64_RS08625	EGM60_RS05520	EGA31_RS12850
1089	13	hypothetical protein	GCF_000007865	MAP_RS05600	0		MAP_RS05600	MAP4_RS13700	RC58_RS13670	RE97_RS13690	A0V42_RS05620	CEP84_RS20830	CEG92_RS05780	EC391_RS05860	EC390_RS16875	EGM63_RS00975	EGM64_RS08630	EGM60_RS05525	EGA31_RS12845
1090	13	amino acid decarboxylase	GCF_000007865	MAP_RS05605	0		MAP_RS05605	MAP4_RS13695	RC58_RS13665	RE97_RS13685	A0V42_RS05625	CEP84_RS20825	CEG92_RS05785	EC391_RS05855	EC390_RS16880	EGM63_RS00970	EGM64_RS08635	EGM60_RS05530	EGA31_RS12840
1091	13	hypothetical protein	GCF_000007865	MAP_RS05610	0		MAP_RS05610	MAP4_RS13690	RC58_RS13660	RE97_RS13680	A0V42_RS05630	CEP84_RS20820	CEG92_RS05790	EC391_RS05850	EC390_RS16885	EGM63_RS00965	EGM64_RS08640	EGM60_RS05535	EGA31_RS12835
1092	13	two-component sensor histidine kinase	GCF_000007865	MAP_RS05615	0		MAP_RS05615	MAP4_RS13685	RC58_RS13655	RE97_RS13675	A0V42_RS05635	CEP84_RS20815	CEG92_RS05795	EC391_RS05845	EC390_RS16890	EGM63_RS00960	EGM64_RS08645	EGM60_RS05540	EGA31_RS12830
1094	13	hypothetical protein	GCF_000007865	MAP_RS05625	0		MAP_RS05625	MAP4_RS13675	RC58_RS13645	RE97_RS13665	A0V42_RS05645	CEP84_RS20805	CEG92_RS05805	EC391_RS05835	EC390_RS16900	EGM63_RS00950	EGM64_RS08655	EGM60_RS05550	EGA31_RS12820
1095	13	hypothetical protein	GCF_000007865	MAP_RS05630	0		MAP_RS05630	MAP4_RS13670	RC58_RS13640	RE97_RS13660	A0V42_RS05650	CEP84_RS20800	CEG92_RS05810	EC391_RS05830	EC390_RS16905	EGM63_RS00945	EGM64_RS08660	EGM60_RS05555	EGA31_RS12815
1096	13	GntR family transcriptional regulator	GCF_000007865	MAP_RS05635	0		MAP_RS05635	MAP4_RS13665	RC58_RS13635	RE97_RS13655	A0V42_RS05655	CEP84_RS20795	CEG92_RS05815	EC391_RS05825	EC390_RS16910	EGM63_RS00940	EGM64_RS08665	EGM60_RS05560	EGA31_RS12810
1097	13	ferredoxin family protein	GCF_000007865	MAP_RS05640	0		MAP_RS05640	MAP4_RS13660	RC58_RS13630	RE97_RS13650	A0V42_RS05660	CEP84_RS20790	CEG92_RS05820	EC391_RS05820	EC390_RS16915	EGM63_RS00935	EGM64_RS08670	EGM60_RS05565	EGA31_RS12805
1098	13	ABC transporter permease	GCF_000007865	MAP_RS05650	0		MAP_RS05650	MAP4_RS13650	RC58_RS13620	RE97_RS13640	A0V42_RS05670	CEP84_RS20780	CEG92_RS05830	EC391_RS05810	EC390_RS16925	EGM63_RS00925	EGM64_RS08680	EGM60_RS05575	EGA31_RS12795
1101	13	N-acetyltransferase	GCF_000007865	MAP_RS05665	0		MAP_RS05665	MAP4_RS13635	RC58_RS13605	RE97_RS13625	A0V42_RS05685	CEP84_RS20765	CEG92_RS05845	EC391_RS05795	EC390_RS16940	EGM63_RS00910	EGM64_RS08695	EGM60_RS05590	EGA31_RS12780
1102	13	hypothetical protein	GCF_000007865	MAP_RS05670	0		MAP_RS05670	MAP4_RS13630	RC58_RS13600	RE97_RS13620	A0V42_RS05690	CEP84_RS20760	CEG92_RS05850	EC391_RS05790	EC390_RS16945	EGM63_RS00905	EGM64_RS08700	EGM60_RS05595	EGA31_RS12775
1103	13	bifunctional pyrimidine operon transcriptional regulator/uracil phosphoribosyltransferase	GCF_000007865	MAP_RS05675	0		MAP_RS05675	MAP4_RS13625	RC58_RS13595	RE97_RS13615	A0V42_RS05695	CEP84_RS20755	CEG92_RS05855	EC391_RS05785	EC390_RS16950	EGM63_RS00900	EGM64_RS08705	EGM60_RS05600	EGA31_RS12770
1104	13	aspartate carbamoyltransferase	GCF_000007865	MAP_RS05680	0		MAP_RS05680	MAP4_RS13620	RC58_RS13590	RE97_RS13610	A0V42_RS05700	CEP84_RS20750	CEG92_RS05860	EC391_RS05780	EC390_RS16955	EGM63_RS00895	EGM64_RS08710	EGM60_RS05605	EGA31_RS12765
1105	13	dihydroorotase	GCF_000007865	MAP_RS05685	0		MAP_RS05685	MAP4_RS13615	RC58_RS13585	RE97_RS13605	A0V42_RS05705	CEP84_RS20745	CEG92_RS05865	EC391_RS05775	EC390_RS16960	EGM63_RS00890	EGM64_RS08715	EGM60_RS05610	EGA31_RS12760
1106	13	hypothetical protein	GCF_000007865	MAP_RS05690	0		MAP_RS05690	MAP4_RS13610	RC58_RS13580	RE97_RS13600	A0V42_RS05710	CEP84_RS20740	CEG92_RS05870	EC391_RS05770	EC390_RS16965	EGM63_RS00885	EGM64_RS08720	EGM60_RS05615	EGA31_RS12755
1107	13	carbamoyl-phosphate synthase small subunit	GCF_000007865	MAP_RS05695	0		MAP_RS05695	MAP4_RS13605	RC58_RS13575	RE97_RS13595	A0V42_RS05715	CEP84_RS20735	CEG92_RS05875	EC391_RS05765	EC390_RS16970	EGM63_RS00880	EGM64_RS08725	EGM60_RS05620	EGA31_RS12750
1108	13	carbamoyl-phosphate synthase large subunit	GCF_000007865	MAP_RS05700	0		MAP_RS05700	MAP4_RS13600	RC58_RS13570	RE97_RS13590	A0V42_RS05720	CEP84_RS20730	CEG92_RS05880	EC391_RS05760	EC390_RS16975	EGM63_RS00875	EGM64_RS08730	EGM60_RS05625	EGA31_RS12745
1110	13	helix-turn-helix domain-containing protein	GCF_000007865	MAP_RS05710	0		MAP_RS05710	MAP4_RS13590	RC58_RS13560	RE97_RS13580	A0V42_RS05730	CEP84_RS20720	CEG92_RS05890	EC391_RS05750	EC390_RS16985	EGM63_RS00865	EGM64_RS08740	EGM60_RS05635	EGA31_RS12735
1111	13	hypothetical protein	GCF_000007865	MAP_RS05715	0		MAP_RS05715	MAP4_RS13585	RC58_RS13555	RE97_RS13575	A0V42_RS05735	CEP84_RS20715	CEG92_RS05895	EC391_RS05745	EC390_RS16990	EGM63_RS00860	EGM64_RS08745	EGM60_RS05640	EGA31_RS12730
1112	13	guanylate kinase	GCF_000007865	MAP_RS05720	0		MAP_RS05720	MAP4_RS13580	RC58_RS13550	RE97_RS13570	A0V42_RS05740	CEP84_RS20710	CEG92_RS05900	EC391_RS05740	EC390_RS16995	EGM63_RS00855	EGM64_RS08750	EGM60_RS05645	EGA31_RS12725
1113	13	DNA-directed RNA polymerase subunit omega	GCF_000007865	MAP_RS05725	0		MAP_RS05725	MAP4_RS13575	RC58_RS13545	RE97_RS13565	A0V42_RS05745	CEP84_RS20705	CEG92_RS05905	EC391_RS05735	EC390_RS17000	EGM63_RS00850	EGM64_RS08755	EGM60_RS05650	EGA31_RS12720
1114	13	bifunctional phosphopantothenoylcysteine decarboxylase/phosphopantothenate--cysteine ligase CoaBC	GCF_000007865	MAP_RS05730	0		MAP_RS05730	MAP4_RS13570	RC58_RS13540	RE97_RS13560	A0V42_RS05750	CEP84_RS20700	CEG92_RS05910	EC391_RS05730	EC390_RS17005	EGM63_RS00845	EGM64_RS08760	EGM60_RS05655	EGA31_RS12715
1115	13	S-adenosylmethionine synthase	GCF_000007865	MAP_RS05735	0		MAP_RS05735	MAP4_RS13565	RC58_RS13535	RE97_RS13555	A0V42_RS05755	CEP84_RS20695	CEG92_RS05915	EC391_RS05725	EC390_RS17010	EGM63_RS00840	EGM64_RS08765	EGM60_RS05660	EGA31_RS12710
1116	13	NAD(P)/FAD-dependent oxidoreductase	GCF_000390085	MAP4_RS13560	0		MAP_RS05740	MAP4_RS13560	RC58_RS13530	RE97_RS13550	A0V42_RS05760	CEP84_RS20690	CEG92_RS05920	EC391_RS05720	EC390_RS17015	EGM63_RS00835	EGM64_RS08770	EGM60_RS05665	EGA31_RS12705
1117	13	alpha/beta hydrolase	GCF_000007865	MAP_RS05745	0		MAP_RS05745	MAP4_RS13555	RC58_RS13525	RE97_RS13545	A0V42_RS05765	CEP84_RS20685	CEG92_RS05925	EC391_RS05715	EC390_RS17020	EGM63_RS00830	EGM64_RS08775	EGM60_RS05670	EGA31_RS12700
1118	13	lysoplasmalogenase	GCF_000007865	MAP_RS05750	0		MAP_RS05750	MAP4_RS13550	RC58_RS13520	RE97_RS13540	A0V42_RS05770	CEP84_RS20680	CEG92_RS05930	EC391_RS05710	EC390_RS17025	EGM63_RS00825	EGM64_RS08780	EGM60_RS05675	EGA31_RS12695
1120	13	MarR family transcriptional regulator	GCF_000007865	MAP_RS05760	0		MAP_RS05760	MAP4_RS13540	RC58_RS13510	RE97_RS13530	A0V42_RS05780	CEP84_RS20670	CEG92_RS05940	EC391_RS05700	EC390_RS17035	EGM63_RS00815	EGM64_RS08790	EGM60_RS05685	EGA31_RS12685
1121	13	class I SAM-dependent methyltransferase	GCF_000007865	MAP_RS05765	0		MAP_RS05765	MAP4_RS13535	RC58_RS13505	RE97_RS13525	A0V42_RS05785	CEP84_RS20665	CEG92_RS05945	EC391_RS05695	EC390_RS17040	EGM63_RS00810	EGM64_RS08795	EGM60_RS05690	EGA31_RS12680
1122	13	methionyl-tRNA formyltransferase	GCF_000007865	MAP_RS05770	0		MAP_RS05770	MAP4_RS13530	RC58_RS13500	RE97_RS13520	A0V42_RS05790	CEP84_RS20660	CEG92_RS05950	EC391_RS05690	EC390_RS17045	EGM63_RS00805	EGM64_RS08800	EGM60_RS05695	EGA31_RS12675
1124	13	ribulose-phosphate 3-epimerase	GCF_000835225	RC58_RS13490	0		MAP_RS05780	MAP4_RS13520	RC58_RS13490	RE97_RS13510	A0V42_RS05800	CEP84_RS20650	CEG92_RS05960	EC391_RS05680	EC390_RS17055	EGM63_RS00795	EGM64_RS08810	EGM60_RS05705	EGA31_RS12665
1125	13	bifunctional diaminohydroxyphosphoribosylaminopyrimidine deaminase/5-amino-6-(5-phosphoribosylamino)uracil reductase RibD	GCF_000007865	MAP_RS05785	0		MAP_RS05785	MAP4_RS13515	RC58_RS13485	RE97_RS13505	A0V42_RS05805	CEP84_RS20645	CEG92_RS05965	EC391_RS05675	EC390_RS17060	EGM63_RS00790	EGM64_RS08815	EGM60_RS05710	EGA31_RS12660
1126	13	MFS transporter	GCF_000007865	MAP_RS05790	0		MAP_RS05790	MAP4_RS13510	RC58_RS13480	RE97_RS13500	A0V42_RS05810	CEP84_RS20640	CEG92_RS05970	EC391_RS05670	EC390_RS17065	EGM63_RS00785	EGM64_RS08820	EGM60_RS05715	EGA31_RS12655
1127	13	LppX_LprAFG lipoprotein	GCF_000007865	MAP_RS05795	0		MAP_RS05795	MAP4_RS13505	RC58_RS13475	RE97_RS13495	A0V42_RS05815	CEP84_RS20635	CEG92_RS05975	EC391_RS05665	EC390_RS17070	EGM63_RS00780	EGM64_RS08825	EGM60_RS05720	EGA31_RS12650
1128	13	riboflavin synthase	GCF_000007865	MAP_RS05800	0		MAP_RS05800	MAP4_RS13500	RC58_RS13470	RE97_RS13490	A0V42_RS05820	CEP84_RS20630	CEG92_RS05980	EC391_RS05660	EC390_RS17075	EGM63_RS00775	EGM64_RS08830	EGM60_RS05725	EGA31_RS12645
1129	13	riboflavin biosynthesis protein RibBA	GCF_000007865	MAP_RS05805	0		MAP_RS05805	MAP4_RS13495	RC58_RS13465	RE97_RS13485	A0V42_RS05825	CEP84_RS20625	CEG92_RS05985	EC391_RS05655	EC390_RS17080	EGM63_RS00770	EGM64_RS08835	EGM60_RS05730	EGA31_RS12640
1130	13	6,7-dimethyl-8-ribityllumazine synthase	GCF_000007865	MAP_RS05810	0		MAP_RS05810	MAP4_RS13490	RC58_RS13460	RE97_RS13480	A0V42_RS05830	CEP84_RS20620	CEG92_RS05990	EC391_RS05650	EC390_RS17085	EGM63_RS00765	EGM64_RS08840	EGM60_RS05735	EGA31_RS12635
1131	13	membrane protein	GCF_000007865	MAP_RS05815	0		MAP_RS05815	MAP4_RS13485	RC58_RS13455	RE97_RS13475	A0V42_RS05835	CEP84_RS20615	CEG92_RS05995	EC391_RS05645	EC390_RS17090	EGM63_RS00760	EGM64_RS08845	EGM60_RS05740	EGA31_RS12630
1132	13	hemophore-related protein	GCF_000007865	MAP_RS05820	0		MAP_RS05820	MAP4_RS13480	RC58_RS13450	RE97_RS13470	A0V42_RS05840	CEP84_RS20610	CEG92_RS06000	EC391_RS05640	EC390_RS17095	EGM63_RS00755	EGM64_RS08850	EGM60_RS05745	EGA31_RS12625
1134	13	cupin	GCF_000007865	MAP_RS05830	0		MAP_RS05830	MAP4_RS13470	RC58_RS13440	RE97_RS13460	A0V42_RS05850	CEP84_RS20600	CEG92_RS06010	EC391_RS05630	EC390_RS17105	EGM63_RS00745	EGM64_RS08860	EGM60_RS05755	EGA31_RS12615
1135	13	excinuclease ABC subunit C	GCF_000007865	MAP_RS05835	0		MAP_RS05835	MAP4_RS13465	RC58_RS13435	RE97_RS13455	A0V42_RS05855	CEP84_RS20595	CEG92_RS06015	EC391_RS05625	EC390_RS17110	EGM63_RS00740	EGM64_RS08865	EGM60_RS05760	EGA31_RS12610
1136	13	RNase adapter RapZ	GCF_000007865	MAP_RS05840	0		MAP_RS05840	MAP4_RS13460	RC58_RS13430	RE97_RS13450	A0V42_RS05860	CEP84_RS20590	CEG92_RS06020	EC391_RS05620	EC390_RS17115	EGM63_RS00735	EGM64_RS08870	EGM60_RS05765	EGA31_RS12605
1137	13	hypothetical protein	GCF_000007865	MAP_RS05845	0		MAP_RS05845	MAP4_RS13455	RC58_RS13425	RE97_RS13445	A0V42_RS05865	CEP84_RS20585	CEG92_RS06025	EC391_RS05615	EC390_RS17120	EGM63_RS00730	EGM64_RS08875	EGM60_RS05770	EGA31_RS12600
1138	13	sporulation protein	GCF_000007865	MAP_RS05850	0		MAP_RS05850	MAP4_RS13450	RC58_RS13420	RE97_RS13440	A0V42_RS05870	CEP84_RS20580	CEG92_RS06030	EC391_RS05610	EC390_RS17125	EGM63_RS00725	EGM64_RS08880	EGM60_RS05775	EGA31_RS12595
1140	13	hypothetical protein	GCF_000007865	MAP_RS22585	0		MAP_RS22585	MAP4_RS22800	RC58_RS22805	RE97_RS22870	A0V42_RS22525	CEP84_RS20570	CEG92_RS06040	EC391_RS05600	EC390_RS17135	EGM63_RS00715	EGM64_RS08890	EGM60_RS05785	EGA31_RS07240
1141	13	PPE family protein	GCF_000007865	MAP_RS05860	0		MAP_RS05860	MAP4_RS13440	RC58_RS13410	RE97_RS13435	A0V42_RS05880	CEP84_RS20565	CEG92_RS06045	EC391_RS05595	EC390_RS17140	EGM63_RS00710	EGM64_RS08895	EGM60_RS05790	EGA31_RS07245
1142	13	PPE family protein	GCF_000007865	MAP_RS05865	0		MAP_RS05865	MAP4_RS13435	RC58_RS13405	RE97_RS13430	A0V42_RS05885	CEP84_RS20560	CEG92_RS06050	EC391_RS05590	EC390_RS17145	EGM63_RS00705	EGM64_RS08900	EGM60_RS05795	EGA31_RS07250
1143	13	DUF732 domain-containing protein	GCF_000007865	MAP_RS05870	0		MAP_RS05870	MAP4_RS13430	RC58_RS13400	RE97_RS13425	A0V42_RS05890	CEP84_RS20555	CEG92_RS06055	EC391_RS05585	EC390_RS17150	EGM63_RS00700	EGM64_RS08905	EGM60_RS05800	EGA31_RS07255
1144	13	PPE family protein	GCF_000007865	MAP_RS05875	0		MAP_RS05875	MAP4_RS13425	RC58_RS13395	RE97_RS13420	A0V42_RS05895	CEP84_RS20550	CEG92_RS06060	EC391_RS05580	EC390_RS17155	EGM63_RS00695	EGM64_RS08910	EGM60_RS05805	EGA31_RS07260
1145	13	wax ester/triacylglycerol synthase family O-acyltransferase	GCF_000007865	MAP_RS05880	0		MAP_RS05880	MAP4_RS13420	RC58_RS13390	RE97_RS13415	A0V42_RS05900	CEP84_RS20545	CEG92_RS06065	EC391_RS05575	EC390_RS17160	EGM63_RS00690	EGM64_RS08915	EGM60_RS05810	EGA31_RS07265
1147	13	alpha/beta hydrolase	GCF_000007865	MAP_RS05890	0		MAP_RS05890	MAP4_RS13410	RC58_RS13380	RE97_RS13405	A0V42_RS05910	CEP84_RS20535	CEG92_RS06075	EC391_RS05565	EC390_RS17170	EGM63_RS00680	EGM64_RS08925	EGM60_RS05820	EGA31_RS07275
1148	13	AMP-dependent synthetase	GCF_000007865	MAP_RS05895	0		MAP_RS05895	MAP4_RS13405	RC58_RS13375	RE97_RS13400	A0V42_RS05915	CEP84_RS20530	CEG92_RS06080	EC391_RS05560	EC390_RS17175	EGM63_RS00675	EGM64_RS08930	EGM60_RS05825	EGA31_RS07280
1149	13	glycerol acyltransferase	GCF_000007865	MAP_RS05900	0		MAP_RS05900	MAP4_RS13400	RC58_RS13370	RE97_RS13395	A0V42_RS05920	CEP84_RS20525	CEG92_RS06085	EC391_RS05555	EC390_RS17180	EGM63_RS00670	EGM64_RS08935	EGM60_RS05830	EGA31_RS07285
1150	13	hypothetical protein	GCF_000007865	MAP_RS05905	0		MAP_RS05905	MAP4_RS13395	RC58_RS13365	RE97_RS13390	A0V42_RS05925	CEP84_RS20520	CEG92_RS06090	EC391_RS05550	EC390_RS17185	EGM63_RS00665	EGM64_RS08940	EGM60_RS05835	EGA31_RS07290
1152	13	NAD(P)/FAD-dependent oxidoreductase	GCF_000007865	MAP_RS05915	0		MAP_RS05915	MAP4_RS13385	RC58_RS13355	RE97_RS13380	A0V42_RS05935	CEP84_RS20510	CEG92_RS06100	EC391_RS05540	EC390_RS17195	EGM63_RS00655	EGM64_RS08950	EGM60_RS05845	EGA31_RS07300
1153	13	aldehyde dehydrogenase	GCF_000007865	MAP_RS05920	0		MAP_RS05920	MAP4_RS13380	RC58_RS13350	RE97_RS13375	A0V42_RS05940	CEP84_RS20505	CEG92_RS06105	EC391_RS05535	EC390_RS17200	EGM63_RS00650	EGM64_RS08955	EGM60_RS05850	EGA31_RS07305
1154	13	phosphoglycerate kinase	GCF_000007865	MAP_RS05925	0		MAP_RS05925	MAP4_RS13375	RC58_RS13345	RE97_RS13370	A0V42_RS05945	CEP84_RS20500	CEG92_RS06110	EC391_RS05530	EC390_RS17205	EGM63_RS00645	EGM64_RS08960	EGM60_RS05855	EGA31_RS07310
1155	13	triose-phosphate isomerase	GCF_000007865	MAP_RS05930	0		MAP_RS05930	MAP4_RS13370	RC58_RS13340	RE97_RS13365	A0V42_RS05950	CEP84_RS20495	CEG92_RS06115	EC391_RS05525	EC390_RS17210	EGM63_RS00640	EGM64_RS08965	EGM60_RS05860	EGA31_RS07315
1156	13	preprotein translocase subunit SecG	GCF_000007865	MAP_RS05935	0		MAP_RS05935	MAP4_RS13365	RC58_RS13335	RE97_RS13360	A0V42_RS05955	CEP84_RS20490	CEG92_RS06120	EC391_RS05520	EC390_RS17215	EGM63_RS00635	EGM64_RS08970	EGM60_RS05865	EGA31_RS07320
1157	13	TIGR03564 family F420-dependent LLM class oxidoreductase	GCF_000007865	MAP_RS05940	0		MAP_RS05940	MAP4_RS13360	RC58_RS13330	RE97_RS13355	A0V42_RS05960	CEP84_RS20485	CEG92_RS06125	EC391_RS05515	EC390_RS17220	EGM63_RS00630	EGM64_RS08975	EGM60_RS05870	EGA31_RS07325
1159	13	DUF4239 domain-containing protein	GCF_000007865	MAP_RS05950	0		MAP_RS05950	MAP4_RS13350	RC58_RS13320	RE97_RS13345	A0V42_RS05970	CEP84_RS20475	CEG92_RS06135	EC391_RS05505	EC390_RS17230	EGM63_RS00620	EGM64_RS08985	EGM60_RS05880	EGA31_RS07335
1160	13	aldo/keto reductase	GCF_000007865	MAP_RS05955	0		MAP_RS05955	MAP4_RS13345	RC58_RS13315	RE97_RS13340	A0V42_RS05975	CEP84_RS20470	CEG92_RS06140	EC391_RS05500	EC390_RS17235	EGM63_RS00615	EGM64_RS08990	EGM60_RS05885	EGA31_RS07340
1161	13	acetoin utilization protein	GCF_000007865	MAP_RS05960	0		MAP_RS05960	MAP4_RS13340	RC58_RS13310	RE97_RS13335	A0V42_RS05980	CEP84_RS20465	CEG92_RS06145	EC391_RS05495	EC390_RS17240	EGM63_RS00610	EGM64_RS08995	EGM60_RS05890	EGA31_RS07345
1162	13	hypothetical protein	GCF_000007865	MAP_RS05965	0		MAP_RS05965	MAP4_RS13335	RC58_RS13305	RE97_RS13330	A0V42_RS05985	CEP84_RS20460	CEG92_RS06150	EC391_RS05490	EC390_RS17245	EGM63_RS00605	EGM64_RS09000	EGM60_RS05895	EGA31_RS07350
1163	13	6-phosphogluconolactonase	GCF_000007865	MAP_RS05970	0		MAP_RS05970	MAP4_RS13330	RC58_RS13300	RE97_RS13325	A0V42_RS05990	CEP84_RS20455	CEG92_RS06155	EC391_RS05485	EC390_RS17250	EGM63_RS00600	EGM64_RS09005	EGM60_RS05900	EGA31_RS07355
1164	13	glucose-6-phosphate dehydrogenase assembly protein OpcA	GCF_000007865	MAP_RS05975	0		MAP_RS05975	MAP4_RS13325	RC58_RS13295	RE97_RS13320	A0V42_RS05995	CEP84_RS20450	CEG92_RS06160	EC391_RS05480	EC390_RS17255	EGM63_RS00595	EGM64_RS09010	EGM60_RS05905	EGA31_RS07360
1165	13	glucose-6-phosphate dehydrogenase	GCF_000007865	MAP_RS05980	0		MAP_RS05980	MAP4_RS13320	RC58_RS13290	RE97_RS13315	A0V42_RS06000	CEP84_RS20445	CEG92_RS06165	EC391_RS05475	EC390_RS17260	EGM63_RS00590	EGM64_RS09015	EGM60_RS05910	EGA31_RS07365
1166	13	transaldolase	GCF_000007865	MAP_RS05985	0		MAP_RS05985	MAP4_RS13315	RC58_RS13285	RE97_RS13310	A0V42_RS06005	CEP84_RS20440	CEG92_RS06170	EC391_RS05470	EC390_RS17265	EGM63_RS00585	EGM64_RS09020	EGM60_RS05915	EGA31_RS07370
1167	13	transketolase	GCF_000007865	MAP_RS05990	0		MAP_RS05990	MAP4_RS13310	RC58_RS13280	RE97_RS13305	A0V42_RS06010	CEP84_RS20435	CEG92_RS06175	EC391_RS05465	EC390_RS17270	EGM63_RS00580	EGM64_RS09025	EGM60_RS05920	EGA31_RS07375
1168	13	protoheme IX farnesyltransferase	GCF_000007865	MAP_RS05995	0		MAP_RS05995	MAP4_RS13305	RC58_RS13275	RE97_RS13300	A0V42_RS06015	CEP84_RS20430	CEG92_RS06180	EC391_RS05460	EC390_RS17275	EGM63_RS00575	EGM64_RS09030	EGM60_RS05925	EGA31_RS07380
1169	13	quinone oxidoreductase	GCF_000007865	MAP_RS06000	0		MAP_RS06000	MAP4_RS13300	RC58_RS13270	RE97_RS13295	A0V42_RS06020	CEP84_RS20425	CEG92_RS06185	EC391_RS05455	EC390_RS17280	EGM63_RS00570	EGM64_RS09035	EGM60_RS05930	EGA31_RS07385
1170	13	hypothetical protein	GCF_000007865	MAP_RS06005	0		MAP_RS06005	MAP4_RS13295	RC58_RS13265	RE97_RS13290	A0V42_RS06025	CEP84_RS20420	CEG92_RS06190	EC391_RS05450	EC390_RS17285	EGM63_RS00565	EGM64_RS09040	EGM60_RS05935	EGA31_RS07390
1172	13	multidrug ABC transporter permease	GCF_000007865	MAP_RS06015	0		MAP_RS06015	MAP4_RS13285	RC58_RS13255	RE97_RS13280	A0V42_RS06035	CEP84_RS20410	CEG92_RS06200	EC391_RS05440	EC390_RS17295	EGM63_RS00555	EGM64_RS09050	EGM60_RS05945	EGA31_RS07400
1173	13	ABC transporter ATP-binding protein	GCF_000007865	MAP_RS06020	0		MAP_RS06020	MAP4_RS13280	RC58_RS13250	RE97_RS13275	A0V42_RS06040	CEP84_RS20405	CEG92_RS06205	EC391_RS05435	EC390_RS17300	EGM63_RS00550	EGM64_RS09055	EGM60_RS05950	EGA31_RS07405
1175	13	transcriptional regulator	GCF_000007865	MAP_RS06030	0		MAP_RS06030	MAP4_RS13270	RC58_RS13240	RE97_RS13265	A0V42_RS06050	CEP84_RS20395	CEG92_RS06215	EC391_RS05425	EC390_RS17310	EGM63_RS00540	EGM64_RS09065	EGM60_RS05960	EGA31_RS07415
1176	13	Fe-S cluster assembly protein SufB	GCF_000007865	MAP_RS06035	0		MAP_RS06035	MAP4_RS13265	RC58_RS13235	RE97_RS13260	A0V42_RS06055	CEP84_RS20390	CEG92_RS06220	EC391_RS05420	EC390_RS17315	EGM63_RS00535	EGM64_RS09070	EGM60_RS05965	EGA31_RS07420
1177	13	Fe-S cluster assembly protein SufD	GCF_000007865	MAP_RS06040	0		MAP_RS06040	MAP4_RS13260	RC58_RS13230	RE97_RS13255	A0V42_RS06060	CEP84_RS20385	CEG92_RS06225	EC391_RS05415	EC390_RS17320	EGM63_RS00530	EGM64_RS09075	EGM60_RS05970	EGA31_RS07425
1178	13	Fe-S cluster assembly ATPase SufC	GCF_000007865	MAP_RS06045	0		MAP_RS06045	MAP4_RS13255	RC58_RS13225	RE97_RS13250	A0V42_RS06065	CEP84_RS20380	CEG92_RS06230	EC391_RS05410	EC390_RS17325	EGM63_RS00525	EGM64_RS09080	EGM60_RS05975	EGA31_RS07430
1179	13	cysteine desulfurase	GCF_000007865	MAP_RS06050	0		MAP_RS06050	MAP4_RS13250	RC58_RS13220	RE97_RS13245	A0V42_RS06070	CEP84_RS20375	CEG92_RS06235	EC391_RS05405	EC390_RS17330	EGM63_RS00520	EGM64_RS09085	EGM60_RS05980	EGA31_RS07435
1180	13	SUF system NifU family Fe-S cluster assembly protein	GCF_000007865	MAP_RS06055	0		MAP_RS06055	MAP4_RS13245	RC58_RS13215	RE97_RS13240	A0V42_RS06075	CEP84_RS20370	CEG92_RS06240	EC391_RS05400	EC390_RS17335	EGM63_RS00515	EGM64_RS09090	EGM60_RS05985	EGA31_RS07440
1181	13	metal-sulfur cluster assembly factor	GCF_000007865	MAP_RS06060	0		MAP_RS06060	MAP4_RS13240	RC58_RS13210	RE97_RS13235	A0V42_RS06080	CEP84_RS20365	CEG92_RS06245	EC391_RS05395	EC390_RS17340	EGM63_RS00510	EGM64_RS09095	EGM60_RS05990	EGA31_RS07445
1183	13	hypothetical protein	GCF_000007865	MAP_RS06070	0		MAP_RS06070	MAP4_RS13230	RC58_RS13200	RE97_RS13225	A0V42_RS06090	CEP84_RS20355	CEG92_RS06255	EC391_RS05385	EC390_RS17350	EGM63_RS00500	EGM64_RS09105	EGM60_RS06000	EGA31_RS07455
1184	13	hypothetical protein	GCF_000007865	MAP_RS06075	0		MAP_RS06075	MAP4_RS13225	RC58_RS13195	RE97_RS13220	A0V42_RS06095	CEP84_RS20350	CEG92_RS06260	EC391_RS05380	EC390_RS17355	EGM63_RS00495	EGM64_RS09110	EGM60_RS06005	EGA31_RS07460
1185	13	acyl-CoA dehydrogenase	GCF_000007865	MAP_RS06080	0		MAP_RS06080	MAP4_RS13220	RC58_RS13190	RE97_RS13215	A0V42_RS06100	CEP84_RS20345	CEG92_RS06265	EC391_RS05375	EC390_RS17360	EGM63_RS00490	EGM64_RS09115	EGM60_RS06010	EGA31_RS07465
1186	13	thioredoxin	GCF_000007865	MAP_RS06085	0		MAP_RS06085	MAP4_RS13215	RC58_RS13185	RE97_RS13210	A0V42_RS06105	CEP84_RS20340	CEG92_RS06270	EC391_RS05370	EC390_RS17365	EGM63_RS00485	EGM64_RS09120	EGM60_RS06015	EGA31_RS07470
1187	13	enoyl-CoA hydratase	GCF_000007865	MAP_RS06090	0		MAP_RS06090	MAP4_RS13210	RC58_RS13180	RE97_RS13205	A0V42_RS06110	CEP84_RS20335	CEG92_RS06275	EC391_RS05365	EC390_RS17370	EGM63_RS00480	EGM64_RS09125	EGM60_RS06020	EGA31_RS07475
1188	13	ABC transporter ATP-binding protein	GCF_000007865	MAP_RS06095	0		MAP_RS06095	MAP4_RS13205	RC58_RS13175	RE97_RS13200	A0V42_RS06115	CEP84_RS20330	CEG92_RS06280	EC391_RS05360	EC390_RS17375	EGM63_RS00475	EGM64_RS09130	EGM60_RS06025	EGA31_RS07480
1189	13	hypothetical protein	GCF_000007865	MAP_RS06100	0		MAP_RS06100	MAP4_RS13200	RC58_RS13170	RE97_RS13195	A0V42_RS06120	CEP84_RS20325	CEG92_RS06285	EC391_RS05355	EC390_RS17380	EGM63_RS00470	EGM64_RS09135	EGM60_RS06030	EGA31_RS07485
1190	13	TetR/AcrR family transcriptional regulator	GCF_000007865	MAP_RS06105	0		MAP_RS06105	MAP4_RS13195	RC58_RS13165	RE97_RS13190	A0V42_RS06125	CEP84_RS20320	CEG92_RS06290	EC391_RS05350	EC390_RS17385	EGM63_RS00465	EGM64_RS09140	EGM60_RS06035	EGA31_RS07490
1191	13	aconitate hydratase	GCF_000390085	MAP4_RS13190	0		MAP_RS06110	MAP4_RS13190	RC58_RS13160	RE97_RS13185	A0V42_RS06130	CEP84_RS20315	CEG92_RS06295	EC391_RS05345	EC390_RS17390	EGM63_RS00460	EGM64_RS09145	EGM60_RS06040	EGA31_RS07495
1192	13	hypothetical protein	GCF_000007865	MAP_RS06115	0		MAP_RS06115	MAP4_RS13185	RC58_RS13155	RE97_RS13180	A0V42_RS06135	CEP84_RS20310	CEG92_RS06300	EC391_RS05340	EC390_RS17395	EGM63_RS00455	EGM64_RS09150	EGM60_RS06045	EGA31_RS07500
1193	13	peptidase M23	GCF_000007865	MAP_RS06120	0		MAP_RS06120	MAP4_RS13180	RC58_RS13150	RE97_RS13175	A0V42_RS06140	CEP84_RS20305	CEG92_RS06305	EC391_RS05335	EC390_RS17400	EGM63_RS00450	EGM64_RS09155	EGM60_RS06050	EGA31_RS07505
1194	13	NlpC/P60 family protein	GCF_000007865	MAP_RS06125	0		MAP_RS06125	MAP4_RS13175	RC58_RS13145	RE97_RS13170	A0V42_RS06145	CEP84_RS20300	CEG92_RS06310	EC391_RS05330	EC390_RS17405	EGM63_RS00445	EGM64_RS09160	EGM60_RS06055	EGA31_RS07510
1195	13	MoxR family ATPase	GCF_000007865	MAP_RS06130	0		MAP_RS06130	MAP4_RS13170	RC58_RS13140	RE97_RS13165	A0V42_RS06150	CEP84_RS20295	CEG92_RS06315	EC391_RS05325	EC390_RS17410	EGM63_RS00440	EGM64_RS09165	EGM60_RS06060	EGA31_RS07515
1196	13	DUF58 domain-containing protein	GCF_000007865	MAP_RS06135	0		MAP_RS06135	MAP4_RS13165	RC58_RS13135	RE97_RS13160	A0V42_RS06155	CEP84_RS20290	CEG92_RS06320	EC391_RS05320	EC390_RS17415	EGM63_RS00435	EGM64_RS09170	EGM60_RS06065	EGA31_RS07520
1197	13	VWA domain-containing protein	GCF_000007865	MAP_RS06140	0		MAP_RS06140	MAP4_RS13160	RC58_RS13130	RE97_RS13155	A0V42_RS06160	CEP84_RS20285	CEG92_RS06325	EC391_RS05315	EC390_RS17420	EGM63_RS00430	EGM64_RS09175	EGM60_RS06070	EGA31_RS07525
1198	13	beta-ketoacyl-ACP reductase	GCF_000007865	MAP_RS06150	0		MAP_RS06150	MAP4_RS13150	RC58_RS13120	RE97_RS13145	A0V42_RS06170	CEP84_RS20275	CEG92_RS06335	EC391_RS05305	EC390_RS17430	EGM63_RS00420	EGM64_RS09185	EGM60_RS06080	EGA31_RS07535
1199	13	enoyl-[acyl-carrier-protein] reductase FabI	GCF_000007865	MAP_RS06155	0		MAP_RS06155	MAP4_RS13145	RC58_RS13115	RE97_RS13140	A0V42_RS06175	CEP84_RS20270	CEG92_RS06340	EC391_RS05300	EC390_RS17435	EGM63_RS00415	EGM64_RS09190	EGM60_RS06085	EGA31_RS07540
1200	13	ferrochelatase	GCF_000007865	MAP_RS06160	0		MAP_RS06160	MAP4_RS13140	RC58_RS13110	RE97_RS13135	A0V42_RS06180	CEP84_RS20265	CEG92_RS06345	EC391_RS05295	EC390_RS17440	EGM63_RS00410	EGM64_RS09195	EGM60_RS06090	EGA31_RS07545
1201	13	hypothetical protein	GCF_000007865	MAP_RS06165	0		MAP_RS06165	MAP4_RS13135	RC58_RS13105	RE97_RS13130	A0V42_RS06185	CEP84_RS20260	CEG92_RS06350	EC391_RS05290	EC390_RS17445	EGM63_RS00405	EGM64_RS09200	EGM60_RS06095	EGA31_RS07550
1202	13	SPFH/Band 7/PHB domain protein	GCF_000007865	MAP_RS06175	0		MAP_RS06175	MAP4_RS13125	RC58_RS13095	RE97_RS13120	A0V42_RS06195	CEP84_RS20250	CEG92_RS06360	EC391_RS05280	EC390_RS17455	EGM63_RS00395	EGM64_RS09210	EGM60_RS06105	EGA31_RS07560
1203	13	hypothetical protein	GCF_000007865	MAP_RS06180	0		MAP_RS06180	MAP4_RS13120	RC58_RS13090	RE97_RS13115	A0V42_RS06200	CEP84_RS20245	CEG92_RS06365	EC391_RS05275	EC390_RS17460	EGM63_RS00390	EGM64_RS09215	EGM60_RS06110	EGA31_RS07565
1204	13	sensor domain-containing protein	GCF_000390085	MAP4_RS22795	0	FG-In	MAP_RS06185	MAP4_RS22795	RC58_RS22795	RE97_RS13110	A0V42_RS06205	CEP84_RS20240	CEG92_RS06370	EC391_RS05270	EC390_RS17465	EGM63_RS00385	EGM64_RS09220	EGM60_RS06115	EGA31_RS07570
1205	13	hypothetical protein	GCF_000007865	MAP_RS22590	0		MAP_RS22590	MAP4_RS22790	RC58_RS22790	RE97_RS22865	A0V42_RS22530	CEP84_RS20235	CEG92_RS06375	EC391_RS05265	EC390_RS17470	EGM63_RS00380	EGM64_RS09225	EGM60_RS06120	EGA31_RS07575
1206	13	hypothetical protein	GCF_000007865	MAP_RS06190	0		MAP_RS06190	MAP4_RS13110	RC58_RS13080	RE97_RS13105	A0V42_RS06210	CEP84_RS20230	CEG92_RS06380	EC391_RS05260	EC390_RS17475	EGM63_RS00375	EGM64_RS09230	EGM60_RS06125	EGA31_RS07580
1207	13	nitroreductase family deazaflavin-dependent oxidoreductase	GCF_000007865	MAP_RS06195	0		MAP_RS06195	MAP4_RS13105	RC58_RS13075	RE97_RS13100	A0V42_RS06215	CEP84_RS20225	CEG92_RS06385	EC391_RS05255	EC390_RS17480	EGM63_RS00370	EGM64_RS09235	EGM60_RS06130	EGA31_RS07585
1208	13	hypothetical protein	GCF_000007865	MAP_RS06200	0		MAP_RS06200	MAP4_RS13100	RC58_RS13070	RE97_RS13095	A0V42_RS06220	CEP84_RS20220	CEG92_RS06390	EC391_RS05250	EC390_RS17485	EGM63_RS00365	EGM64_RS09240	EGM60_RS06135	EGA31_RS07590
1209	13	DNA-binding response regulator	GCF_000007865	MAP_RS06205	0		MAP_RS06205	MAP4_RS13095	RC58_RS13065	RE97_RS13090	A0V42_RS06225	CEP84_RS20215	CEG92_RS06395	EC391_RS05245	EC390_RS17490	EGM63_RS00360	EGM64_RS09245	EGM60_RS06140	EGA31_RS07595
1210	13	sensor histidine kinase	GCF_000007865	MAP_RS06210	0		MAP_RS06210	MAP4_RS13090	RC58_RS13060	RE97_RS13085	A0V42_RS06230	CEP84_RS20210	CEG92_RS06400	EC391_RS05240	EC390_RS17495	EGM63_RS00355	EGM64_RS09250	EGM60_RS06145	EGA31_RS07600
1212	13	hypothetical protein	GCF_000007865	MAP_RS06215	0		MAP_RS06215	MAP4_RS13085	RC58_RS13055	RE97_RS13080	A0V42_RS06235	CEP84_RS20200	CEG92_RS06410	EC391_RS05230	EC390_RS17505	EGM63_RS00345	EGM64_RS09260	EGM60_RS06155	EGA31_RS07610
1213	13	TVP38/TMEM64 family protein	GCF_000007865	MAP_RS06220	0		MAP_RS06220	MAP4_RS13080	RC58_RS13050	RE97_RS13075	A0V42_RS06240	CEP84_RS20195	CEG92_RS06415	EC391_RS05225	EC390_RS17510	EGM63_RS00340	EGM64_RS09265	EGM60_RS06160	EGA31_RS07615
1214	13	methylmalonyl-CoA mutase small subunit	GCF_000007865	MAP_RS06225	0		MAP_RS06225	MAP4_RS13075	RC58_RS13045	RE97_RS13070	A0V42_RS06245	CEP84_RS20190	CEG92_RS06420	EC391_RS05220	EC390_RS17515	EGM63_RS00335	EGM64_RS09270	EGM60_RS06165	EGA31_RS07620
1215	13	methylmalonyl-CoA mutase	GCF_000007865	MAP_RS06230	0		MAP_RS06230	MAP4_RS13070	RC58_RS13040	RE97_RS13065	A0V42_RS06250	CEP84_RS20185	CEG92_RS06425	EC391_RS05215	EC390_RS17520	EGM63_RS00330	EGM64_RS09275	EGM60_RS06170	EGA31_RS07625
1216	13	methylmalonyl Co-A mutase-associated GTPase MeaB	GCF_000007865	MAP_RS06235	0		MAP_RS06235	MAP4_RS13065	RC58_RS13035	RE97_RS13060	A0V42_RS06255	CEP84_RS20180	CEG92_RS06430	EC391_RS05210	EC390_RS17525	EGM63_RS00325	EGM64_RS09280	EGM60_RS06175	EGA31_RS07630
1217	13	esterase	GCF_000007865	MAP_RS06240	0		MAP_RS06240	MAP4_RS13060	RC58_RS13030	RE97_RS13055	A0V42_RS06260	CEP84_RS20175	CEG92_RS06435	EC391_RS05205	EC390_RS17530	EGM63_RS00320	EGM64_RS09285	EGM60_RS06180	EGA31_RS07635
1219	13	sulfotransferase family protein	GCF_000835225	RC58_RS13020	0	FG-In	MAP_RS06250	MAP4_RS13050	RC58_RS13020	RE97_RS13045	A0V42_RS06270	CEP84_RS20165	CEG92_RS06445	EC391_RS05195	EC390_RS17540	EGM63_RS00310	EGM64_RS09295	EGM60_RS06190	EGA31_RS07645
1220	13	GDP-mannose 4,6-dehydratase	GCF_000007865	MAP_RS06255	0		MAP_RS06255	MAP4_RS13045	RC58_RS13015	RE97_RS13040	A0V42_RS06275	CEP84_RS20160	CEG92_RS06450	EC391_RS05190	EC390_RS17545	EGM63_RS00300	EGM64_RS09305	EGM60_RS06195	EGA31_RS07720
1221	13	GDP-L-fucose synthase	GCF_000007865	MAP_RS06260	0		MAP_RS06260	MAP4_RS13040	RC58_RS13010	RE97_RS13035	A0V42_RS06280	CEP84_RS20155	CEG92_RS06455	EC391_RS05185	EC390_RS17550	EGM63_RS00295	EGM64_RS09310	EGM60_RS06200	EGA31_RS07725
1222	13	FkbM family methyltransferase	GCF_000007865	MAP_RS22600	0		MAP_RS22600	MAP4_RS22780	RC58_RS22780	RE97_RS22855	A0V42_RS22540	CEP84_RS20150	CEG92_RS06460	EC391_RS05180	EC390_RS17555	EGM63_RS00290	EGM64_RS09315	EGM60_RS06205	EGA31_RS07730
1224	13	acyltransferase	GCF_000007865	MAP_RS22605	0		MAP_RS22605	MAP4_RS22775	RC58_RS22775	RE97_RS22850	A0V42_RS22545	CEP84_RS20140	CEG92_RS06470	EC391_RS05170	EC390_RS17565	EGM63_RS00280	EGM64_RS09325	EGM60_RS06215	EGA31_RS07740
1225	13	hypothetical protein	GCF_000835225	RC58_RS13000	0		MAP_RS06270	MAP4_RS13030	RC58_RS13000	RE97_RS13025	A0V42_RS06290	CEP84_RS20135	CEG92_RS06475	EC391_RS05165	EC390_RS17570	EGM63_RS00275	EGM64_RS09330	EGM60_RS06220	EGA31_RS07745
1226	13	ABC transporter	GCF_000007865	MAP_RS06275	0		MAP_RS06275	MAP4_RS13025	RC58_RS12995	RE97_RS13020	A0V42_RS06295	CEP84_RS20130	CEG92_RS06480	EC391_RS05160	EC390_RS17575	EGM63_RS00270	EGM64_RS09335	EGM60_RS06225	EGA31_RS07750
1227	13	daunorubicin resistance protein DrrA family ABC transporter ATP-binding protein	GCF_000007865	MAP_RS06280	0		MAP_RS06280	MAP4_RS13020	RC58_RS12990	RE97_RS13015	A0V42_RS06300	CEP84_RS20125	CEG92_RS06485	EC391_RS05155	EC390_RS17580	EGM63_RS00265	EGM64_RS09340	EGM60_RS06230	EGA31_RS07755
1228	13	MMPL family RND transporter	GCF_000007865	MAP_RS06285	0		MAP_RS06285	MAP4_RS13015	RC58_RS12985	RE97_RS13010	A0V42_RS06305	CEP84_RS20120	CEG92_RS06490	EC391_RS05150	EC390_RS17585	EGM63_RS00260	EGM64_RS09345	EGM60_RS06235	EGA31_RS07760
1229	13	MMPL family RND transporter	GCF_000007865	MAP_RS06290	0		MAP_RS06290	MAP4_RS13010	RC58_RS12980	RE97_RS13005	A0V42_RS06310	CEP84_RS20115	CEG92_RS06495	EC391_RS05145	EC390_RS17590	EGM63_RS00255	EGM64_RS09350	EGM60_RS06240	EGA31_RS07765
1230	13	membrane protein	GCF_000007865	MAP_RS06295	0		MAP_RS06295	MAP4_RS13005	RC58_RS12975	RE97_RS13000	A0V42_RS06315	CEP84_RS20110	CEG92_RS06500	EC391_RS05140	EC390_RS17595	EGM63_RS00250	EGM64_RS09355	EGM60_RS06245	EGA31_RS07770
1231	13	MbtH family protein	GCF_000007865	MAP_RS06300	0		MAP_RS06300	MAP4_RS13000	RC58_RS12970	RE97_RS12995	A0V42_RS06320	CEP84_RS20105	CEG92_RS06505	EC391_RS05135	EC390_RS17600	EGM63_RS00245	EGM64_RS09360	EGM60_RS06250	EGA31_RS07775
1233	13	carboxymuconolactone decarboxylase family protein	GCF_000007865	MAP_RS06310	0		MAP_RS06310	MAP4_RS12990	RC58_RS12960	RE97_RS12985	A0V42_RS06330	CEP84_RS20095	CEG92_RS06515	EC391_RS05125	EC390_RS17610	EGM63_RS00235	EGM64_RS09370	EGM60_RS06260	EGA31_RS07785
1235	13	hypothetical protein	GCF_000007865	MAP_RS06320	0		MAP_RS06320	MAP4_RS12980	RC58_RS12950	RE97_RS12975	A0V42_RS06340	CEP84_RS20080	CEG92_RS06525	EC391_RS05110	EC390_RS17625	EGM63_RS00220	EGM64_RS09385	EGM60_RS06275	EGA31_RS07800
1237	13	DUF559 domain-containing protein	GCF_000007865	MAP_RS06330	0		MAP_RS06330	MAP4_RS12970	RC58_RS12940	RE97_RS12965	A0V42_RS06350	CEP84_RS20070	CEG92_RS06535	EC391_RS05100	EC390_RS17635	EGM63_RS00210	EGM64_RS09395	EGM60_RS06285	EGA31_RS07810
1238	13	DNA polymerase IV	GCF_000007865	MAP_RS06335	0		MAP_RS06335	MAP4_RS12965	RC58_RS12935	RE97_RS12960	A0V42_RS06355	CEP84_RS20065	CEG92_RS06540	EC391_RS05095	EC390_RS17640	EGM63_RS00205	EGM64_RS09400	EGM60_RS06290	EGA31_RS07815
1239	13	asparaginase	GCF_000007865	MAP_RS06340	0		MAP_RS06340	MAP4_RS12960	RC58_RS12930	RE97_RS12955	A0V42_RS06360	CEP84_RS20060	CEG92_RS06545	EC391_RS05090	EC390_RS17645	EGM63_RS00200	EGM64_RS09405	EGM60_RS06295	EGA31_RS07820
1240	13	signal peptidase II	GCF_000007865	MAP_RS06345	0		MAP_RS06345	MAP4_RS12955	RC58_RS12925	RE97_RS12950	A0V42_RS06365	CEP84_RS20055	CEG92_RS06550	EC391_RS05085	EC390_RS17650	EGM63_RS00195	EGM64_RS09410	EGM60_RS06300	EGA31_RS07825
1241	13	RluA family pseudouridine synthase	GCF_000007865	MAP_RS06350	0		MAP_RS06350	MAP4_RS12950	RC58_RS12920	RE97_RS12945	A0V42_RS06370	CEP84_RS20050	CEG92_RS06555	EC391_RS05080	EC390_RS17655	EGM63_RS00190	EGM64_RS09415	EGM60_RS06305	EGA31_RS07830
1242	13	class I SAM-dependent methyltransferase	GCF_000390085	MAP4_RS12945	0		MAP_RS06355	MAP4_RS12945	RC58_RS12915	RE97_RS12940	A0V42_RS06375	CEP84_RS20045	CEG92_RS06560	EC391_RS05075	EC390_RS17660	EGM63_RS00185	EGM64_RS09420	EGM60_RS06310	EGA31_RS07835
1243	13	group 1 truncated hemoglobin GlbN	GCF_000007865	MAP_RS06360	0		MAP_RS06360	MAP4_RS12940	RC58_RS12910	RE97_RS12935	A0V42_RS06380	CEP84_RS20040	CEG92_RS06565	EC391_RS05070	EC390_RS17665	EGM63_RS00180	EGM64_RS09425	EGM60_RS06315	EGA31_RS07840
1245	13	SRPBCC family protein	GCF_000007865	MAP_RS06375	0		MAP_RS06375	MAP4_RS12925	RC58_RS12895	RE97_RS12920	A0V42_RS06395	CEP84_RS20025	CEG92_RS06580	EC391_RS05055	EC390_RS17680	EGM63_RS00165	EGM64_RS09440	EGM60_RS06330	EGA31_RS07855
1246	13	DNA polymerase III subunit alpha	GCF_000007865	MAP_RS06380	0		MAP_RS06380	MAP4_RS12920	RC58_RS12890	RE97_RS12915	A0V42_RS06400	CEP84_RS20020	CEG92_RS06585	EC391_RS05050	EC390_RS17685	EGM63_RS00160	EGM64_RS09445	EGM60_RS06335	EGA31_RS07860
1247	13	PPOX class F420-dependent oxidoreductase	GCF_000007865	MAP_RS06385	0		MAP_RS06385	MAP4_RS12915	RC58_RS12885	RE97_RS12910	A0V42_RS06405	CEP84_RS20015	CEG92_RS06590	EC391_RS05045	EC390_RS17690	EGM63_RS00155	EGM64_RS09450	EGM60_RS06340	EGA31_RS07865
1248	13	MerR family DNA-binding transcriptional regulator	GCF_000007865	MAP_RS06390	0		MAP_RS06390	MAP4_RS12910	RC58_RS12880	RE97_RS12905	A0V42_RS06410	CEP84_RS20010	CEG92_RS06595	EC391_RS05040	EC390_RS17695	EGM63_RS00150	EGM64_RS09455	EGM60_RS06345	EGA31_RS07870
1249	13	long-chain fatty acid--CoA ligase	GCF_000007865	MAP_RS06395	0		MAP_RS06395	MAP4_RS12905	RC58_RS12875	RE97_RS12900	A0V42_RS06415	CEP84_RS20005	CEG92_RS06600	EC391_RS05035	EC390_RS17700	EGM63_RS00145	EGM64_RS09460	EGM60_RS06350	EGA31_RS07875
1250	13	glycerol-3-phosphate acyltransferase	GCF_000007865	MAP_RS06400	0		MAP_RS06400	MAP4_RS12900	RC58_RS12870	RE97_RS12895	A0V42_RS06420	CEP84_RS20000	CEG92_RS06605	EC391_RS05030	EC390_RS17705	EGM63_RS00140	EGM64_RS09465	EGM60_RS06355	EGA31_RS07880
1251	13	hypothetical protein	GCF_000007865	MAP_RS06405	0		MAP_RS06405	MAP4_RS12895	RC58_RS12865	RE97_RS12890	A0V42_RS06425	CEP84_RS19995	CEG92_RS06610	EC391_RS05025	EC390_RS17710	EGM63_RS00135	EGM64_RS09470	EGM60_RS06360	EGA31_RS07885
1252	13	nitroreductase family deazaflavin-dependent oxidoreductase	GCF_000007865	MAP_RS06410	0		MAP_RS06410	MAP4_RS12890	RC58_RS12860	RE97_RS12885	A0V42_RS06430	CEP84_RS19990	CEG92_RS06615	EC391_RS05020	EC390_RS17715	EGM63_RS00130	EGM64_RS09475	EGM60_RS06365	EGA31_RS07890
1253	13	threonine ammonia-lyase	GCF_000007865	MAP_RS06415	0		MAP_RS06415	MAP4_RS12885	RC58_RS12855	RE97_RS12880	A0V42_RS06435	CEP84_RS19985	CEG92_RS06620	EC391_RS05015	EC390_RS17720	EGM63_RS00125	EGM64_RS09480	EGM60_RS06370	EGA31_RS07895
1257	13	malto-oligosyltrehalose trehalohydrolase	GCF_000007865	MAP_RS06435	0		MAP_RS06435	MAP4_RS12865	RC58_RS12835	RE97_RS12860	A0V42_RS06455	CEP84_RS19965	CEG92_RS06645	EC391_RS04995	EC390_RS17740	EGM63_RS00105	EGM64_RS09500	EGM60_RS06390	EGA31_RS07915
1258	13	malto-oligosyltrehalose synthase	GCF_000007865	MAP_RS06440	0		MAP_RS06440	MAP4_RS12860	RC58_RS12830	RE97_RS12855	A0V42_RS06460	CEP84_RS19960	CEG92_RS06650	EC391_RS04990	EC390_RS17745	EGM63_RS00100	EGM64_RS09505	EGM60_RS06395	EGA31_RS07920
1259	13	glycogen debranching enzyme GlgX	GCF_000007865	MAP_RS06445	0		MAP_RS06445	MAP4_RS12855	RC58_RS12825	RE97_RS12850	A0V42_RS06465	CEP84_RS19955	CEG92_RS06655	EC391_RS04985	EC390_RS17750	EGM63_RS00095	EGM64_RS09510	EGM60_RS06400	EGA31_RS07925
1260	13	acyltransferase	GCF_000007865	MAP_RS06450	0		MAP_RS06450	MAP4_RS12850	RC58_RS12820	RE97_RS12845	A0V42_RS06470	CEP84_RS19950	CEG92_RS06660	EC391_RS04980	EC390_RS17755	EGM63_RS00090	EGM64_RS09515	EGM60_RS06405	EGA31_RS07930
1261	13	hypothetical protein	GCF_000007865	MAP_RS06455	0		MAP_RS06455	MAP4_RS12845	RC58_RS12815	RE97_RS12840	A0V42_RS06475	CEP84_RS19945	CEG92_RS06665	EC391_RS04975	EC390_RS17760	EGM63_RS00085	EGM64_RS09520	EGM60_RS06410	EGA31_RS07935
1262	13	hypothetical protein	GCF_000007865	MAP_RS06460	0		MAP_RS06460	MAP4_RS12840	RC58_RS12810	RE97_RS12835	A0V42_RS06480	CEP84_RS19940	CEG92_RS06670	EC391_RS04970	EC390_RS17765	EGM63_RS00080	EGM64_RS09525	EGM60_RS06415	EGA31_RS07940
1263	13	adenosylmethionine--8-amino-7-oxononanoate transaminase	GCF_000007865	MAP_RS06465	0		MAP_RS06465	MAP4_RS12835	RC58_RS12805	RE97_RS12830	A0V42_RS06485	CEP84_RS19935	CEG92_RS06675	EC391_RS04965	EC390_RS17770	EGM63_RS00075	EGM64_RS09530	EGM60_RS06420	EGA31_RS07945
1264	13	8-amino-7-oxononanoate synthase	GCF_000007865	MAP_RS06470	0		MAP_RS06470	MAP4_RS12830	RC58_RS12800	RE97_RS12825	A0V42_RS06490	CEP84_RS19930	CEG92_RS06680	EC391_RS04960	EC390_RS17775	EGM63_RS00070	EGM64_RS09535	EGM60_RS06425	EGA31_RS07950
1265	13	ATP-dependent dethiobiotin synthetase BioD	GCF_000007865	MAP_RS06475	0		MAP_RS06475	MAP4_RS12825	RC58_RS12795	RE97_RS12820	A0V42_RS06495	CEP84_RS19925	CEG92_RS06685	EC391_RS04955	EC390_RS17780	EGM63_RS00065	EGM64_RS09540	EGM60_RS06430	EGA31_RS07955
1266	13	hypothetical protein	GCF_000007865	MAP_RS06480	0		MAP_RS06480	MAP4_RS12820	RC58_RS12790	RE97_RS12815	A0V42_RS06500	CEP84_RS19920	CEG92_RS06690	EC391_RS04950	EC390_RS17785	EGM63_RS00060	EGM64_RS09545	EGM60_RS06435	EGA31_RS07960
1268	13	hypothetical protein	GCF_000007865	MAP_RS06495	0		MAP_RS06495	MAP4_RS12805	RC58_RS12775	RE97_RS12800	A0V42_RS06515	CEP84_RS19905	CEG92_RS06705	EC391_RS04935	EC390_RS17800	EGM63_RS00045	EGM64_RS09560	EGM60_RS06450	EGA31_RS07975
1269	13	hypothetical protein	GCF_000007865	MAP_RS06500	0		MAP_RS06500	MAP4_RS12800	RC58_RS12770	RE97_RS12795	A0V42_RS06520	CEP84_RS19900	CEG92_RS06710	EC391_RS04930	EC390_RS17805	EGM63_RS00040	EGM64_RS09565	EGM60_RS06455	EGA31_RS07980
1270	13	hypothetical protein	GCF_000007865	MAP_RS06505	0		MAP_RS06505	MAP4_RS12795	RC58_RS12765	RE97_RS12790	A0V42_RS06525	CEP84_RS19895	CEG92_RS06715	EC391_RS04925	EC390_RS17810	EGM63_RS00035	EGM64_RS09570	EGM60_RS06460	EGA31_RS07985
1271	13	hypothetical protein	GCF_000007865	MAP_RS06510	0		MAP_RS06510	MAP4_RS12790	RC58_RS12760	RE97_RS12785	A0V42_RS06530	CEP84_RS19890	CEG92_RS06720	EC391_RS04920	EC390_RS17815	EGM63_RS00030	EGM64_RS09575	EGM60_RS06465	EGA31_RS07990
1272	13	biotin synthase	GCF_000007865	MAP_RS06515	0		MAP_RS06515	MAP4_RS12785	RC58_RS12755	RE97_RS12780	A0V42_RS06535	CEP84_RS19885	CEG92_RS06725	EC391_RS04915	EC390_RS17820	EGM63_RS00025	EGM64_RS09580	EGM60_RS06470	EGA31_RS07995
1273	13	hypothetical protein	GCF_000007865	MAP_RS06520	0		MAP_RS06520	MAP4_RS12780	RC58_RS12750	RE97_RS12775	A0V42_RS06540	CEP84_RS19880	CEG92_RS06730	EC391_RS04910	EC390_RS17825	EGM63_RS00020	EGM64_RS09585	EGM60_RS06475	EGA31_RS08000
1275	13	lipase	GCF_000007865	MAP_RS06530	0		MAP_RS06530	MAP4_RS12770	RC58_RS12740	RE97_RS12765	A0V42_RS06550	CEP84_RS19870	CEG92_RS06740	EC391_RS04900	EC390_RS17835	EGM63_RS00010	EGM64_RS09595	EGM60_RS06485	EGA31_RS08010
1280	13	nicotinate-nucleotide diphosphorylase (carboxylating)	GCF_000007865	MAP_RS06555	0		MAP_RS06555	MAP4_RS12745	RC58_RS12720	RE97_RS12740	A0V42_RS06575	CEP84_RS19845	CEG92_RS06765	EC391_RS04875	EC390_RS17860	EGM63_RS23035	EGM64_RS09620	EGM60_RS06510	EGA31_RS08035
1281	13	nitroreductase family deazaflavin-dependent oxidoreductase	GCF_000007865	MAP_RS06560	0		MAP_RS06560	MAP4_RS12740	RC58_RS12715	RE97_RS12735	A0V42_RS06580	CEP84_RS19840	CEG92_RS06770	EC391_RS04870	EC390_RS17865	EGM63_RS23030	EGM64_RS09625	EGM60_RS06515	EGA31_RS08040
1282	13	histidinol dehydrogenase	GCF_000007865	MAP_RS06565	0		MAP_RS06565	MAP4_RS12735	RC58_RS12710	RE97_RS12730	A0V42_RS06585	CEP84_RS19835	CEG92_RS06775	EC391_RS04865	EC390_RS17870	EGM63_RS23025	EGM64_RS09630	EGM60_RS06520	EGA31_RS08045
1283	13	histidinol-phosphate aminotransferase	GCF_000007865	MAP_RS06570	0		MAP_RS06570	MAP4_RS12730	RC58_RS12705	RE97_RS12725	A0V42_RS06590	CEP84_RS19830	CEG92_RS06780	EC391_RS04860	EC390_RS17875	EGM63_RS23020	EGM64_RS09635	EGM60_RS06525	EGA31_RS08050
1284	13	imidazoleglycerol-phosphate dehydratase	GCF_000007865	MAP_RS06575	0		MAP_RS06575	MAP4_RS12725	RC58_RS12700	RE97_RS12720	A0V42_RS06595	CEP84_RS19825	CEG92_RS06785	EC391_RS04855	EC390_RS17880	EGM63_RS23015	EGM64_RS09640	EGM60_RS06530	EGA31_RS08055
1285	13	imidazole glycerol phosphate synthase subunit HisH	GCF_000007865	MAP_RS06580	0		MAP_RS06580	MAP4_RS12720	RC58_RS12695	RE97_RS12715	A0V42_RS06600	CEP84_RS19820	CEG92_RS06790	EC391_RS04850	EC390_RS17885	EGM63_RS23010	EGM64_RS09645	EGM60_RS06535	EGA31_RS08060
1286	13	bifunctional 1-(5-phosphoribosyl)-5-((5- phosphoribosylamino)methylideneamino)imidazole-4- carboxamide isomerase/phosphoribosylanthranilate isomerase PriA	GCF_000007865	MAP_RS06585	0		MAP_RS06585	MAP4_RS12715	RC58_RS12690	RE97_RS12710	A0V42_RS06605	CEP84_RS19815	CEG92_RS06795	EC391_RS04845	EC390_RS17890	EGM63_RS23005	EGM64_RS09650	EGM60_RS06540	EGA31_RS08065
1287	13	inositol monophosphatase	GCF_000007865	MAP_RS06590	0		MAP_RS06590	MAP4_RS12710	RC58_RS12685	RE97_RS12705	A0V42_RS06610	CEP84_RS19810	CEG92_RS06800	EC391_RS04840	EC390_RS17895	EGM63_RS23000	EGM64_RS09655	EGM60_RS06545	EGA31_RS08070
1288	13	imidazole glycerol phosphate synthase cyclase subunit	GCF_000007865	MAP_RS06595	0		MAP_RS06595	MAP4_RS12705	RC58_RS12680	RE97_RS12700	A0V42_RS06615	CEP84_RS19805	CEG92_RS06805	EC391_RS04835	EC390_RS17900	EGM63_RS22995	EGM64_RS09660	EGM60_RS06550	EGA31_RS08075
1289	13	phosphoribosyl-AMP cyclohydrolase	GCF_000007865	MAP_RS06600	0		MAP_RS06600	MAP4_RS12700	RC58_RS12675	RE97_RS12695	A0V42_RS06620	CEP84_RS19800	CEG92_RS06810	EC391_RS04830	EC390_RS17905	EGM63_RS22990	EGM64_RS09665	EGM60_RS06555	EGA31_RS08080
1290	13	ionic transporter y4hA	GCF_000007865	MAP_RS06605	0		MAP_RS06605	MAP4_RS12695	RC58_RS12670	RE97_RS12690	A0V42_RS06625	CEP84_RS19795	CEG92_RS06815	EC391_RS04825	EC390_RS17910	EGM63_RS22985	EGM64_RS09670	EGM60_RS06560	EGA31_RS08085
1291	13	peroxiredoxin	GCF_000007865	MAP_RS06610	0		MAP_RS06610	MAP4_RS12690	RC58_RS12665	RE97_RS12685	A0V42_RS06630	CEP84_RS19790	CEG92_RS06820	EC391_RS04820	EC390_RS17915	EGM63_RS22980	EGM64_RS09675	EGM60_RS06565	EGA31_RS08090
1292	13	anthranilate synthase component I	GCF_000007865	MAP_RS06615	0		MAP_RS06615	MAP4_RS12685	RC58_RS12660	RE97_RS12680	A0V42_RS06635	CEP84_RS19785	CEG92_RS06825	EC391_RS04815	EC390_RS17920	EGM63_RS22975	EGM64_RS09680	EGM60_RS06570	EGA31_RS08095
1293	13	indole-3-glycerol-phosphate synthase	GCF_000007865	MAP_RS06625	0		MAP_RS06625	MAP4_RS12675	RC58_RS12650	RE97_RS12670	A0V42_RS06645	CEP84_RS19775	CEG92_RS06835	EC391_RS04805	EC390_RS17930	EGM63_RS22965	EGM64_RS09690	EGM60_RS06580	EGA31_RS08105
1294	13	tryptophan synthase subunit beta	GCF_000007865	MAP_RS06630	0		MAP_RS06630	MAP4_RS12670	RC58_RS12645	RE97_RS12665	A0V42_RS06650	CEP84_RS19770	CEG92_RS06840	EC391_RS04800	EC390_RS17935	EGM63_RS22960	EGM64_RS09695	EGM60_RS06585	EGA31_RS08110
1295	13	tryptophan synthase subunit alpha	GCF_000007865	MAP_RS06635	0		MAP_RS06635	MAP4_RS12665	RC58_RS12640	RE97_RS12660	A0V42_RS06655	CEP84_RS19765	CEG92_RS06845	EC391_RS04795	EC390_RS17940	EGM63_RS22955	EGM64_RS09700	EGM60_RS06590	EGA31_RS08115
1296	13	diacylglyceryl transferase	GCF_000007865	MAP_RS06640	0		MAP_RS06640	MAP4_RS12660	RC58_RS12635	RE97_RS12655	A0V42_RS06660	CEP84_RS19760	CEG92_RS06850	EC391_RS04790	EC390_RS17945	EGM63_RS22950	EGM64_RS09705	EGM60_RS06595	EGA31_RS08120
1297	13	DUF2752 domain-containing protein	GCF_000007865	MAP_RS06645	0		MAP_RS06645	MAP4_RS12655	RC58_RS12630	RE97_RS12650	A0V42_RS06665	CEP84_RS19755	CEG92_RS06855	EC391_RS04785	EC390_RS17950	EGM63_RS22945	EGM64_RS09710	EGM60_RS06600	EGA31_RS08125
1298	13	pyruvate kinase	GCF_000007865	MAP_RS06650	0		MAP_RS06650	MAP4_RS12650	RC58_RS12625	RE97_RS12645	A0V42_RS06670	CEP84_RS19750	CEG92_RS06860	EC391_RS04780	EC390_RS17955	EGM63_RS22940	EGM64_RS09715	EGM60_RS06605	EGA31_RS08130
1299	13	acyl-CoA thioesterase II	GCF_000007865	MAP_RS06655	0		MAP_RS06655	MAP4_RS12645	RC58_RS12620	RE97_RS12640	A0V42_RS06675	CEP84_RS19745	CEG92_RS06865	EC391_RS04775	EC390_RS17960	EGM63_RS22935	EGM64_RS09720	EGM60_RS06610	EGA31_RS08135
1301	13	thiol reductant ABC exporter subunit CydD	GCF_000007865	MAP_RS06670	0		MAP_RS06670	MAP4_RS12630	RC58_RS12605	RE97_RS12625	A0V42_RS06690	CEP84_RS19730	CEG92_RS06880	EC391_RS04760	EC390_RS17975	EGM63_RS22920	EGM64_RS09735	EGM60_RS06625	EGA31_RS08150
1302	13	cytochrome d ubiquinol oxidase subunit II	GCF_000007865	MAP_RS06675	0		MAP_RS06675	MAP4_RS12625	RC58_RS12600	RE97_RS12620	A0V42_RS06695	CEP84_RS19725	CEG92_RS06885	EC391_RS04755	EC390_RS17980	EGM63_RS22915	EGM64_RS09740	EGM60_RS06630	EGA31_RS08155
1303	13	cytochrome ubiquinol oxidase subunit I	GCF_000007865	MAP_RS06680	0		MAP_RS06680	MAP4_RS12620	RC58_RS12595	RE97_RS12615	A0V42_RS06700	CEP84_RS19720	CEG92_RS06890	EC391_RS04750	EC390_RS17985	EGM63_RS22910	EGM64_RS09745	EGM60_RS06635	EGA31_RS08160
1304	13	membrane protein	GCF_000007865	MAP_RS06685	0		MAP_RS06685	MAP4_RS12615	RC58_RS12590	RE97_RS12610	A0V42_RS06705	CEP84_RS19715	CEG92_RS06895	EC391_RS04745	EC390_RS17990	EGM63_RS22905	EGM64_RS09750	EGM60_RS06640	EGA31_RS08165
1305	13	adenylate cyclase	GCF_000007865	MAP_RS06690	0		MAP_RS06690	MAP4_RS12610	RC58_RS12585	RE97_RS12605	A0V42_RS06710	CEP84_RS19710	CEG92_RS06900	EC391_RS04740	EC390_RS17995	EGM63_RS22900	EGM64_RS09755	EGM60_RS06645	EGA31_RS08170
1306	13	response regulator	GCF_000007865	MAP_RS06700	0		MAP_RS06700	MAP4_RS12600	RC58_RS12575	RE97_RS12595	A0V42_RS06720	CEP84_RS19700	CEG92_RS06910	EC391_RS04730	EC390_RS18005	EGM63_RS22885	EGM64_RS09770	EGM60_RS06660	EGA31_RS08185
1307	13	acetyl-CoA acetyltransferase	GCF_000007865	MAP_RS06705	0		MAP_RS06705	MAP4_RS12595	RC58_RS12570	RE97_RS12590	A0V42_RS06725	CEP84_RS19695	CEG92_RS06915	EC391_RS04725	EC390_RS18010	EGM63_RS22880	EGM64_RS09775	EGM60_RS06665	EGA31_RS08190
1308	13	benzoylsuccinyl-CoA thiolase	GCF_000007865	MAP_RS06710	0		MAP_RS06710	MAP4_RS12590	RC58_RS12565	RE97_RS12585	A0V42_RS06730	CEP84_RS19690	CEG92_RS06920	EC391_RS04720	EC390_RS18015	EGM63_RS22875	EGM64_RS09780	EGM60_RS06670	EGA31_RS08195
1309	13	DNA polymerase I	GCF_000007865	MAP_RS06715	0		MAP_RS06715	MAP4_RS12585	RC58_RS12560	RE97_RS12580	A0V42_RS06735	CEP84_RS19685	CEG92_RS06925	EC391_RS04715	EC390_RS18020	EGM63_RS22870	EGM64_RS09785	EGM60_RS06675	EGA31_RS08200
1310	13	TetR/AcrR family transcriptional regulator	GCF_000007865	MAP_RS06720	0		MAP_RS06720	MAP4_RS12580	RC58_RS12555	RE97_RS12575	A0V42_RS06740	CEP84_RS19680	CEG92_RS06930	EC391_RS04710	EC390_RS18025	EGM63_RS22865	EGM64_RS09790	EGM60_RS06680	EGA31_RS08205
1311	13	lignostilbene-alpha,beta-dioxygenase-like enzyme	GCF_000007865	MAP_RS06725	0		MAP_RS06725	MAP4_RS12575	RC58_RS12550	RE97_RS12570	A0V42_RS06745	CEP84_RS19675	CEG92_RS06935	EC391_RS04705	EC390_RS18030	EGM63_RS22860	EGM64_RS09795	EGM60_RS06685	EGA31_RS08210
1312	13	30S ribosomal protein S1	GCF_000007865	MAP_RS06730	0		MAP_RS06730	MAP4_RS12570	RC58_RS12545	RE97_RS12565	A0V42_RS06750	CEP84_RS19670	CEG92_RS06940	EC391_RS04700	EC390_RS18035	EGM63_RS22855	EGM64_RS09800	EGM60_RS06690	EGA31_RS08215
1313	13	dephospho-CoA kinase	GCF_000007865	MAP_RS06735	0		MAP_RS06735	MAP4_RS12565	RC58_RS12540	RE97_RS12560	A0V42_RS06755	CEP84_RS19665	CEG92_RS06945	EC391_RS04695	EC390_RS18040	EGM63_RS22850	EGM64_RS09805	EGM60_RS06695	EGA31_RS08220
1314	13	hypothetical protein	GCF_000007865	MAP_RS06740	0		MAP_RS06740	MAP4_RS12560	RC58_RS12535	RE97_RS12555	A0V42_RS06760	CEP84_RS19660	CEG92_RS06950	EC391_RS04690	EC390_RS18045	EGM63_RS22845	EGM64_RS09810	EGM60_RS06700	EGA31_RS08225
1315	13	Fpg/Nei family DNA glycosylase	GCF_000007865	MAP_RS06745	0		MAP_RS06745	MAP4_RS12555	RC58_RS12530	RE97_RS12550	A0V42_RS06765	CEP84_RS19655	CEG92_RS06955	EC391_RS04685	EC390_RS18050	EGM63_RS22840	EGM64_RS09815	EGM60_RS06705	EGA31_RS08230
1316	13	ATP-dependent DNA ligase	GCF_000007865	MAP_RS06750	0		MAP_RS06750	MAP4_RS12550	RC58_RS12525	RE97_RS12545	A0V42_RS06770	CEP84_RS19650	CEG92_RS06960	EC391_RS04680	EC390_RS18055	EGM63_RS22835	EGM64_RS09820	EGM60_RS06710	EGA31_RS08235
1317	13	DUF402 domain-containing protein	GCF_000007865	MAP_RS06755	0		MAP_RS06755	MAP4_RS12545	RC58_RS12520	RE97_RS12540	A0V42_RS06775	CEP84_RS19645	CEG92_RS06965	EC391_RS04675	EC390_RS18060	EGM63_RS22830	EGM64_RS09825	EGM60_RS06715	EGA31_RS08240
1318	13	ABC transporter ATP-binding protein	GCF_000007865	MAP_RS06760	0		MAP_RS06760	MAP4_RS12540	RC58_RS12515	RE97_RS12535	A0V42_RS06780	CEP84_RS19640	CEG92_RS06970	EC391_RS04670	EC390_RS18065	EGM63_RS22825	EGM64_RS09830	EGM60_RS06720	EGA31_RS08245
1320	13	hypothetical protein	GCF_000007865	MAP_RS06770	0		MAP_RS06770	MAP4_RS12530	RC58_RS12505	RE97_RS12520	A0V42_RS06790	CEP84_RS19630	CEG92_RS06980	EC391_RS04660	EC390_RS18075	EGM63_RS22815	EGM64_RS09840	EGM60_RS06730	EGA31_RS08255
1322	13	hypothetical protein	GCF_000007865	MAP_RS06780	0		MAP_RS06780	MAP4_RS12520	RC58_RS12495	RE97_RS12510	A0V42_RS06800	CEP84_RS19620	CEG92_RS06990	EC391_RS04650	EC390_RS18085	EGM63_RS22805	EGM64_RS09850	EGM60_RS06740	EGA31_RS08265
1323	13	excinuclease ABC subunit B	GCF_000007865	MAP_RS06785	0		MAP_RS06785	MAP4_RS12515	RC58_RS12490	RE97_RS12505	A0V42_RS06805	CEP84_RS19615	CEG92_RS06995	EC391_RS04645	EC390_RS18090	EGM63_RS22800	EGM64_RS09855	EGM60_RS06745	EGA31_RS08270
1324	13	membrane protein	GCF_000007865	MAP_RS06795	0		MAP_RS06795	MAP4_RS12505	RC58_RS12480	RE97_RS12495	A0V42_RS06815	CEP84_RS19605	CEG92_RS07005	EC391_RS04635	EC390_RS18100	EGM63_RS22790	EGM64_RS09865	EGM60_RS06755	EGA31_RS08280
1325	13	membrane protein	GCF_000007865	MAP_RS06800	0		MAP_RS06800	MAP4_RS12500	RC58_RS12475	RE97_RS12490	A0V42_RS06820	CEP84_RS19600	CEG92_RS07010	EC391_RS04630	EC390_RS18105	EGM63_RS22785	EGM64_RS09870	EGM60_RS06760	EGA31_RS08285
1326	13	universal stress protein	GCF_000007865	MAP_RS06805	0		MAP_RS06805	MAP4_RS12495	RC58_RS12470	RE97_RS12485	A0V42_RS06825	CEP84_RS19590	CEG92_RS07020	EC391_RS04620	EC390_RS18115	EGM63_RS22775	EGM64_RS09880	EGM60_RS06770	EGA31_RS08295
1327	13	MBL fold metallo-hydrolase	GCF_000007865	MAP_RS06810	0		MAP_RS06810	MAP4_RS12490	RC58_RS12465	RE97_RS12480	A0V42_RS06830	CEP84_RS19585	CEG92_RS07025	EC391_RS04615	EC390_RS18120	EGM63_RS22770	EGM64_RS09885	EGM60_RS06775	EGA31_RS08300
1328	13	excinuclease ABC subunit UvrA	GCF_000007865	MAP_RS06815	0		MAP_RS06815	MAP4_RS12485	RC58_RS12460	RE97_RS12475	A0V42_RS06835	CEP84_RS19580	CEG92_RS07030	EC391_RS04610	EC390_RS18125	EGM63_RS22765	EGM64_RS09890	EGM60_RS06780	EGA31_RS08305
1329	13	hypothetical protein	GCF_000007865	MAP_RS06820	0		MAP_RS06820	MAP4_RS12480	RC58_RS12455	RE97_RS12470	A0V42_RS06840	CEP84_RS19575	CEG92_RS07035	EC391_RS04605	EC390_RS18130	EGM63_RS22760	EGM64_RS09895	EGM60_RS06785	EGA31_RS08310
1330	13	hypothetical protein	GCF_000007865	MAP_RS06825	0		MAP_RS06825	MAP4_RS12475	RC58_RS12450	RE97_RS12465	A0V42_RS06845	CEP84_RS19570	CEG92_RS07040	EC391_RS04600	EC390_RS18135	EGM63_RS22755	EGM64_RS09900	EGM60_RS06790	EGA31_RS08315
1331	13	cytochrome P450	GCF_000007865	MAP_RS06830	0		MAP_RS06830	MAP4_RS12470	RC58_RS12445	RE97_RS12460	A0V42_RS06850	CEP84_RS19565	CEG92_RS07045	EC391_RS04595	EC390_RS18140	EGM63_RS22750	EGM64_RS09905	EGM60_RS06795	EGA31_RS08320
1332	13	class I SAM-dependent methyltransferase	GCF_000007865	MAP_RS06835	0		MAP_RS06835	MAP4_RS12465	RC58_RS12440	RE97_RS12455	A0V42_RS06855	CEP84_RS19560	CEG92_RS07050	EC391_RS04590	EC390_RS18145	EGM63_RS22745	EGM64_RS09910	EGM60_RS06800	EGA31_RS08325
1333	13	hypothetical protein	GCF_000007865	MAP_RS06845	0		MAP_RS06845	MAP4_RS12455	RC58_RS12430	RE97_RS12445	A0V42_RS06865	CEP84_RS19550	CEG92_RS07060	EC391_RS04580	EC390_RS18155	EGM63_RS22735	EGM64_RS09920	EGM60_RS06810	EGA31_RS08335
1334	13	TetR/AcrR family transcriptional regulator	GCF_000007865	MAP_RS06850	0		MAP_RS06850	MAP4_RS12450	RC58_RS12425	RE97_RS12440	A0V42_RS06870	CEP84_RS19545	CEG92_RS07065	EC391_RS04575	EC390_RS18160	EGM63_RS22730	EGM64_RS09925	EGM60_RS06815	EGA31_RS08340
1335	13	hypothetical protein	GCF_000007865	MAP_RS06855	0		MAP_RS06855	MAP4_RS12445	RC58_RS12420	RE97_RS12435	A0V42_RS06875	CEP84_RS19540	CEG92_RS07070	EC391_RS04570	EC390_RS18165	EGM63_RS22725	EGM64_RS09930	EGM60_RS06820	EGA31_RS08345
1336	13	hypothetical protein	GCF_000007865	MAP_RS06860	0		MAP_RS06860	MAP4_RS12440	RC58_RS12415	RE97_RS12430	A0V42_RS06880	CEP84_RS19535	CEG92_RS07075	EC391_RS04565	EC390_RS18170	EGM63_RS22720	EGM64_RS09935	EGM60_RS06825	EGA31_RS08350
1337	13	bifunctional lysylphosphatidylglycerol synthetase/lysine--tRNA ligase LysX	GCF_000007865	MAP_RS06865	0		MAP_RS06865	MAP4_RS12435	RC58_RS12410	RE97_RS12425	A0V42_RS06885	CEP84_RS19530	CEG92_RS07080	EC391_RS04560	EC390_RS18175	EGM63_RS22715	EGM64_RS09940	EGM60_RS06830	EGA31_RS08355
1338	13	translation initiation factor IF-3	GCF_000007865	MAP_RS06870	0		MAP_RS06870	MAP4_RS12430	RC58_RS12405	RE97_RS12420	A0V42_RS06890	CEP84_RS19525	CEG92_RS07085	EC391_RS04555	EC390_RS18180	EGM63_RS22710	EGM64_RS09945	EGM60_RS06835	EGA31_RS08360
1339	13	50S ribosomal protein L35	GCF_000007865	MAP_RS06875	0		MAP_RS06875	MAP4_RS12425	RC58_RS12400	RE97_RS12415	A0V42_RS06895	CEP84_RS19520	CEG92_RS07090	EC391_RS04550	EC390_RS18185	EGM63_RS22705	EGM64_RS09950	EGM60_RS06840	EGA31_RS08365
1340	13	50S ribosomal protein L20	GCF_000007865	MAP_RS06880	0		MAP_RS06880	MAP4_RS12420	RC58_RS12395	RE97_RS12410	A0V42_RS06900	CEP84_RS19515	CEG92_RS07095	EC391_RS04545	EC390_RS18190	EGM63_RS22700	EGM64_RS09955	EGM60_RS06845	EGA31_RS08370
1341	13	RNA methyltransferase	GCF_000007865	MAP_RS06885	0		MAP_RS06885	MAP4_RS12415	RC58_RS12390	RE97_RS12405	A0V42_RS06905	CEP84_RS19510	CEG92_RS07100	EC391_RS04540	EC390_RS18195	EGM63_RS22695	EGM64_RS09960	EGM60_RS06850	EGA31_RS08375
1342	13	DUF2236 domain-containing protein	GCF_000007865	MAP_RS06890	0		MAP_RS06890	MAP4_RS12410	RC58_RS12385	RE97_RS12400	A0V42_RS06910	CEP84_RS19505	CEG92_RS07105	EC391_RS04535	EC390_RS18200	EGM63_RS22690	EGM64_RS09965	EGM60_RS06855	EGA31_RS08380
1343	13	hypothetical protein	GCF_000007865	MAP_RS06900	0		MAP_RS06900	MAP4_RS12400	RC58_RS12375	RE97_RS12390	A0V42_RS06920	CEP84_RS19495	CEG92_RS07115	EC391_RS04525	EC390_RS18210	EGM63_RS22680	EGM64_RS09975	EGM60_RS06865	EGA31_RS08390
1344	13	phenylalanine--tRNA ligase subunit alpha	GCF_000007865	MAP_RS06905	0		MAP_RS06905	MAP4_RS12395	RC58_RS12370	RE97_RS12385	A0V42_RS06925	CEP84_RS19490	CEG92_RS07120	EC391_RS04520	EC390_RS18215	EGM63_RS22675	EGM64_RS09980	EGM60_RS06870	EGA31_RS08395
1345	13	phenylalanine--tRNA ligase subunit beta	GCF_000007865	MAP_RS06910	0		MAP_RS06910	MAP4_RS12390	RC58_RS12365	RE97_RS12380	A0V42_RS06930	CEP84_RS19485	CEG92_RS07125	EC391_RS04515	EC390_RS18220	EGM63_RS22670	EGM64_RS09985	EGM60_RS06875	EGA31_RS08400
1346	13	N-acetyl-gamma-glutamyl-phosphate reductase	GCF_000007865	MAP_RS06915	0		MAP_RS06915	MAP4_RS12385	RC58_RS12360	RE97_RS12375	A0V42_RS06935	CEP84_RS19480	CEG92_RS07130	EC391_RS04510	EC390_RS18225	EGM63_RS22665	EGM64_RS09990	EGM60_RS06880	EGA31_RS08405
1347	13	bifunctional glutamate N-acetyltransferase/amino-acid N-acetyltransferase	GCF_000007865	MAP_RS06920	0		MAP_RS06920	MAP4_RS12380	RC58_RS12355	RE97_RS12370	A0V42_RS06940	CEP84_RS19475	CEG92_RS07135	EC391_RS04505	EC390_RS18230	EGM63_RS22660	EGM64_RS09995	EGM60_RS06885	EGA31_RS08410
1348	13	acetylglutamate kinase	GCF_000007865	MAP_RS06925	0		MAP_RS06925	MAP4_RS12375	RC58_RS12350	RE97_RS12365	A0V42_RS06945	CEP84_RS19470	CEG92_RS07140	EC391_RS04500	EC390_RS18235	EGM63_RS22655	EGM64_RS10000	EGM60_RS06890	EGA31_RS08415
1349	13	acetylornithine transaminase	GCF_000007865	MAP_RS06930	0		MAP_RS06930	MAP4_RS12370	RC58_RS12345	RE97_RS12360	A0V42_RS06950	CEP84_RS19465	CEG92_RS07145	EC391_RS04495	EC390_RS18240	EGM63_RS22650	EGM64_RS10005	EGM60_RS06895	EGA31_RS08420
1350	13	ornithine carbamoyltransferase	GCF_000007865	MAP_RS06935	0		MAP_RS06935	MAP4_RS12365	RC58_RS12340	RE97_RS12355	A0V42_RS06955	CEP84_RS19460	CEG92_RS07150	EC391_RS04490	EC390_RS18245	EGM63_RS22645	EGM64_RS10010	EGM60_RS06900	EGA31_RS08425
1351	13	arginine repressor	GCF_000007865	MAP_RS06940	0		MAP_RS06940	MAP4_RS12360	RC58_RS12335	RE97_RS12350	A0V42_RS06960	CEP84_RS19455	CEG92_RS07155	EC391_RS04485	EC390_RS18250	EGM63_RS22640	EGM64_RS10015	EGM60_RS06905	EGA31_RS08430
1352	13	argininosuccinate synthase	GCF_000007865	MAP_RS06945	0		MAP_RS06945	MAP4_RS12355	RC58_RS12330	RE97_RS12345	A0V42_RS06965	CEP84_RS19450	CEG92_RS07160	EC391_RS04480	EC390_RS18255	EGM63_RS22635	EGM64_RS10020	EGM60_RS06910	EGA31_RS08435
1354	13	type III polyketide synthase	GCF_000007865	MAP_RS06955	0		MAP_RS06955	MAP4_RS12345	RC58_RS12320	RE97_RS12335	A0V42_RS06975	CEP84_RS19440	CEG92_RS07170	EC391_RS04470	EC390_RS18265	EGM63_RS22625	EGM64_RS10030	EGM60_RS06920	EGA31_RS08445
1356	13	polyketide synthase	GCF_000007865	MAP_RS06970	0		MAP_RS06970	MAP4_RS12330	RC58_RS12305	RE97_RS12320	A0V42_RS06990	CEP84_RS19425	CEG92_RS07185	EC391_RS04445	EC390_RS18280	EGM63_RS22600	EGM64_RS10055	EGM60_RS06945	EGA31_RS08460
1358	13	ABC transporter ATP-binding protein	GCF_000007865	MAP_RS06980	0		MAP_RS06980	MAP4_RS12320	RC58_RS12295	RE97_RS12310	A0V42_RS07000	CEP84_RS19415	CEG92_RS07195	EC391_RS04435	EC390_RS18290	EGM63_RS22590	EGM64_RS10065	EGM60_RS06955	EGA31_RS08470
1359	13	LysR family transcriptional regulator	GCF_000007865	MAP_RS06990	0		MAP_RS06990	MAP4_RS12310	RC58_RS12285	RE97_RS12300	A0V42_RS07010	CEP84_RS19405	CEG92_RS07205	EC391_RS04425	EC390_RS18300	EGM63_RS22580	EGM64_RS10075	EGM60_RS06965	EGA31_RS08480
1360	13	NAD(P)-dependent oxidoreductase	GCF_000007865	MAP_RS06995	0		MAP_RS06995	MAP4_RS12305	RC58_RS12280	RE97_RS12295	A0V42_RS07015	CEP84_RS19400	CEG92_RS07210	EC391_RS04420	EC390_RS18305	EGM63_RS22575	EGM64_RS10080	EGM60_RS06970	EGA31_RS08485
1361	13	hypothetical protein	GCF_000007865	MAP_RS07005	0		MAP_RS07005	MAP4_RS12295	RC58_RS12270	RE97_RS12285	A0V42_RS07025	CEP84_RS19390	CEG92_RS07220	EC391_RS04410	EC390_RS18315	EGM63_RS22565	EGM64_RS10090	EGM60_RS06980	EGA31_RS08495
1362	13	NAD(P)-dependent oxidoreductase	GCF_000007865	MAP_RS07010	0		MAP_RS07010	MAP4_RS12290	RC58_RS12265	RE97_RS12280	A0V42_RS07030	CEP84_RS19385	CEG92_RS07225	EC391_RS04405	EC390_RS18320	EGM63_RS22560	EGM64_RS10095	EGM60_RS06985	EGA31_RS08500
1363	13	NAD(P)-dependent oxidoreductase	GCF_000007865	MAP_RS07015	0		MAP_RS07015	MAP4_RS12285	RC58_RS12260	RE97_RS12275	A0V42_RS07035	CEP84_RS19380	CEG92_RS07230	EC391_RS04400	EC390_RS18325	EGM63_RS22555	EGM64_RS10100	EGM60_RS06990	EGA31_RS08505
1364	13	mandelate racemase	GCF_000007865	MAP_RS07020	0		MAP_RS07020	MAP4_RS12280	RC58_RS12255	RE97_RS12270	A0V42_RS07040	CEP84_RS19375	CEG92_RS07235	EC391_RS04395	EC390_RS18330	EGM63_RS22550	EGM64_RS10105	EGM60_RS06995	EGA31_RS08510
1366	13	glycoside hydrolase family 15 protein	GCF_000007865	MAP_RS07030	0		MAP_RS07030	MAP4_RS12270	RC58_RS12245	RE97_RS12260	A0V42_RS07050	CEP84_RS19365	CEG92_RS07245	EC391_RS04385	EC390_RS18340	EGM63_RS22540	EGM64_RS10115	EGM60_RS07005	EGA31_RS08520
1367	13	GMC family oxidoreductase	GCF_000007865	MAP_RS07035	0		MAP_RS07035	MAP4_RS12265	RC58_RS12240	RE97_RS12255	A0V42_RS07055	CEP84_RS19360	CEG92_RS07250	EC391_RS04380	EC390_RS18345	EGM63_RS22535	EGM64_RS10120	EGM60_RS07010	EGA31_RS08525
1368	13	hypothetical protein	GCF_000007865	MAP_RS07040	0		MAP_RS07040	MAP4_RS12260	RC58_RS12235	RE97_RS12250	A0V42_RS07060	CEP84_RS19355	CEG92_RS07255	EC391_RS04375	EC390_RS18350	EGM63_RS22530	EGM64_RS10125	EGM60_RS07015	EGA31_RS08530
1369	13	hypothetical protein	GCF_000007865	MAP_RS07045	0		MAP_RS07045	MAP4_RS12255	RC58_RS12230	RE97_RS12245	A0V42_RS07065	CEP84_RS19350	CEG92_RS07260	EC391_RS04370	EC390_RS18355	EGM63_RS22525	EGM64_RS10130	EGM60_RS07020	EGA31_RS08535
1371	13	acyl-CoA synthetase	GCF_000007865	MAP_RS07055	0		MAP_RS07055	MAP4_RS12245	RC58_RS12220	RE97_RS12235	A0V42_RS07075	CEP84_RS19340	CEG92_RS07270	EC391_RS04360	EC390_RS18365	EGM63_RS22515	EGM64_RS10140	EGM60_RS07030	EGA31_RS08545
1372	13	hypothetical protein	GCF_000007865	MAP_RS07060	0		MAP_RS07060	MAP4_RS12240	RC58_RS12215	RE97_RS12230	A0V42_RS07080	CEP84_RS19335	CEG92_RS07275	EC391_RS04355	EC390_RS18370	EGM63_RS22510	EGM64_RS10145	EGM60_RS07035	EGA31_RS08550
1373	13	TetR/AcrR family transcriptional regulator	GCF_000007865	MAP_RS07065	0		MAP_RS07065	MAP4_RS12235	RC58_RS12210	RE97_RS12225	A0V42_RS07085	CEP84_RS19330	CEG92_RS07280	EC391_RS04350	EC390_RS18375	EGM63_RS22505	EGM64_RS10150	EGM60_RS07040	EGA31_RS08555
1374	13	antibiotic ABC transporter permease	GCF_000007865	MAP_RS07070	0		MAP_RS07070	MAP4_RS12230	RC58_RS12205	RE97_RS12220	A0V42_RS07090	CEP84_RS19325	CEG92_RS07285	EC391_RS04345	EC390_RS18380	EGM63_RS22500	EGM64_RS10155	EGM60_RS07045	EGA31_RS08560
1375	13	ABC transporter ATP-binding protein	GCF_000007865	MAP_RS07075	0		MAP_RS07075	MAP4_RS12225	RC58_RS12200	RE97_RS12215	A0V42_RS07095	CEP84_RS19320	CEG92_RS07290	EC391_RS04340	EC390_RS18385	EGM63_RS22495	EGM64_RS10160	EGM60_RS07050	EGA31_RS08565
1376	13	ammonium transporter	GCF_000007865	MAP_RS07080	0		MAP_RS07080	MAP4_RS12220	RC58_RS12195	RE97_RS12210	A0V42_RS07100	CEP84_RS19315	CEG92_RS07295	EC391_RS04335	EC390_RS18390	EGM63_RS22490	EGM64_RS10165	EGM60_RS07055	EGA31_RS08570
1377	13	DNA-3-methyladenine glycosylase	GCF_000007865	MAP_RS07085	0		MAP_RS07085	MAP4_RS12215	RC58_RS12190	RE97_RS12205	A0V42_RS07105	CEP84_RS19310	CEG92_RS07300	EC391_RS04330	EC390_RS18395	EGM63_RS22485	EGM64_RS10170	EGM60_RS07060	EGA31_RS08575
1378	13	tyrosine--tRNA ligase	GCF_000007865	MAP_RS07090	0		MAP_RS07090	MAP4_RS12210	RC58_RS12185	RE97_RS12200	A0V42_RS07110	CEP84_RS19305	CEG92_RS07305	EC391_RS04325	EC390_RS18400	EGM63_RS22480	EGM64_RS10175	EGM60_RS07065	EGA31_RS08580
1379	13	DUF732 domain-containing protein	GCF_000007865	MAP_RS07095	0		MAP_RS07095	MAP4_RS12205	RC58_RS12180	RE97_RS12195	A0V42_RS07115	CEP84_RS19300	CEG92_RS07310	EC391_RS04320	EC390_RS18405	EGM63_RS22475	EGM64_RS10180	EGM60_RS07070	EGA31_RS08585
1381	13	haloacid dehalogenase	GCF_000007865	MAP_RS07105	0		MAP_RS07105	MAP4_RS12195	RC58_RS12170	RE97_RS12185	A0V42_RS07125	CEP84_RS19290	CEG92_RS07320	EC391_RS04310	EC390_RS18415	EGM63_RS22465	EGM64_RS10190	EGM60_RS07080	EGA31_RS08595
1382	13	hypothetical protein	GCF_000007865	MAP_RS07110	0		MAP_RS07110	MAP4_RS12190	RC58_RS12165	RE97_RS12180	A0V42_RS07130	CEP84_RS19285	CEG92_RS07325	EC391_RS04305	EC390_RS18420	EGM63_RS22460	EGM64_RS10195	EGM60_RS07085	EGA31_RS08600
1383	13	TlyA family RNA methyltransferase	GCF_000007865	MAP_RS07115	0		MAP_RS07115	MAP4_RS12185	RC58_RS12160	RE97_RS12175	A0V42_RS07135	CEP84_RS19280	CEG92_RS07330	EC391_RS04300	EC390_RS18425	EGM63_RS22455	EGM64_RS10200	EGM60_RS07090	EGA31_RS08605
1384	13	NAD(+) kinase	GCF_000007865	MAP_RS07120	0		MAP_RS07120	MAP4_RS12180	RC58_RS12155	RE97_RS12170	A0V42_RS07140	CEP84_RS19275	CEG92_RS07335	EC391_RS04295	EC390_RS18430	EGM63_RS22450	EGM64_RS10205	EGM60_RS07095	EGA31_RS08610
1385	13	DNA repair protein RecN	GCF_000007865	MAP_RS07125	0		MAP_RS07125	MAP4_RS12175	RC58_RS12150	RE97_RS12165	A0V42_RS07145	CEP84_RS19270	CEG92_RS07340	EC391_RS04290	EC390_RS18435	EGM63_RS22445	EGM64_RS10210	EGM60_RS07100	EGA31_RS08615
1386	13	hypothetical protein	GCF_000007865	MAP_RS07130	0		MAP_RS07130	MAP4_RS12170	RC58_RS12145	RE97_RS12160	A0V42_RS07150	CEP84_RS19265	CEG92_RS07345	EC391_RS04285	EC390_RS18440	EGM63_RS22440	EGM64_RS10215	EGM60_RS07105	EGA31_RS08620
1387	13	copper transporter	GCF_000007865	MAP_RS07135	0		MAP_RS07135	MAP4_RS12165	RC58_RS12140	RE97_RS12155	A0V42_RS07155	CEP84_RS19260	CEG92_RS07350	EC391_RS04280	EC390_RS18445	EGM63_RS22435	EGM64_RS10220	EGM60_RS07110	EGA31_RS08625
1388	13	CTP synthetase	GCF_000007865	MAP_RS07140	0		MAP_RS07140	MAP4_RS12160	RC58_RS12135	RE97_RS12150	A0V42_RS07160	CEP84_RS19255	CEG92_RS07355	EC391_RS04275	EC390_RS18450	EGM63_RS22430	EGM64_RS10225	EGM60_RS07115	EGA31_RS08630
1389	13	NUDIX hydrolase	GCF_000007865	MAP_RS07145	0		MAP_RS07145	MAP4_RS12155	RC58_RS12130	RE97_RS12145	A0V42_RS07165	CEP84_RS19250	CEG92_RS07360	EC391_RS04270	EC390_RS18455	EGM63_RS22425	EGM64_RS10230	EGM60_RS07120	EGA31_RS08635
1390	13	site-specific tyrosine recombinase XerD	GCF_000007865	MAP_RS07150	0		MAP_RS07150	MAP4_RS12150	RC58_RS12125	RE97_RS12140	A0V42_RS07170	CEP84_RS19245	CEG92_RS07365	EC391_RS04265	EC390_RS18460	EGM63_RS22420	EGM64_RS10235	EGM60_RS07125	EGA31_RS08640
1391	13	O-methyltransferase	GCF_000007865	MAP_RS07155	0		MAP_RS07155	MAP4_RS12145	RC58_RS12120	RE97_RS12135	A0V42_RS07175	CEP84_RS19240	CEG92_RS07370	EC391_RS04260	EC390_RS18465	EGM63_RS22415	EGM64_RS10240	EGM60_RS07130	EGA31_RS08645
1392	13	ParA family protein	GCF_000007865	MAP_RS07160	0		MAP_RS07160	MAP4_RS12140	RC58_RS12115	RE97_RS12130	A0V42_RS07180	CEP84_RS19235	CEG92_RS07375	EC391_RS04255	EC390_RS18470	EGM63_RS22410	EGM64_RS10245	EGM60_RS07135	EGA31_RS08650
1393	13	segregation/condensation protein A	GCF_000007865	MAP_RS07165	0		MAP_RS07165	MAP4_RS12135	RC58_RS12110	RE97_RS12125	A0V42_RS07185	CEP84_RS19230	CEG92_RS07380	EC391_RS04250	EC390_RS18475	EGM63_RS22405	EGM64_RS10250	EGM60_RS07140	EGA31_RS08655
1394	13	SMC-Scp complex subunit ScpB	GCF_000007865	MAP_RS07170	0		MAP_RS07170	MAP4_RS12130	RC58_RS12105	RE97_RS12120	A0V42_RS07190	CEP84_RS19225	CEG92_RS07385	EC391_RS04245	EC390_RS18480	EGM63_RS22400	EGM64_RS10255	EGM60_RS07145	EGA31_RS08660
1395	13	rRNA pseudouridine synthase	GCF_000007865	MAP_RS07175	0		MAP_RS07175	MAP4_RS12125	RC58_RS12100	RE97_RS12115	A0V42_RS07195	CEP84_RS19220	CEG92_RS07390	EC391_RS04240	EC390_RS18485	EGM63_RS22395	EGM64_RS10260	EGM60_RS07150	EGA31_RS08665
1396	13	cytidylate kinase	GCF_000007865	MAP_RS07180	0		MAP_RS07180	MAP4_RS12120	RC58_RS12095	RE97_RS12110	A0V42_RS07200	CEP84_RS19215	CEG92_RS07395	EC391_RS04235	EC390_RS18490	EGM63_RS22390	EGM64_RS10265	EGM60_RS07155	EGA31_RS08670
1397	13	GTPase Der	GCF_000007865	MAP_RS07185	0		MAP_RS07185	MAP4_RS12115	RC58_RS12090	RE97_RS12105	A0V42_RS07205	CEP84_RS19210	CEG92_RS07400	EC391_RS04230	EC390_RS18495	EGM63_RS22385	EGM64_RS10270	EGM60_RS07160	EGA31_RS08675
1398	13	DUF2510 domain-containing protein	GCF_000007865	MAP_RS07195	0		MAP_RS07195	MAP4_RS12105	RC58_RS12080	RE97_RS12095	A0V42_RS07215	CEP84_RS19200	CEG92_RS07410	EC391_RS04220	EC390_RS18505	EGM63_RS22375	EGM64_RS10280	EGM60_RS07170	EGA31_RS08685
1399	13	DUF4383 domain-containing protein	GCF_000007865	MAP_RS07200	0		MAP_RS07200	MAP4_RS12100	RC58_RS12075	RE97_RS12090	A0V42_RS07220	CEP84_RS19195	CEG92_RS07415	EC391_RS04215	EC390_RS18510	EGM63_RS22370	EGM64_RS10285	EGM60_RS07175	EGA31_RS08690
1400	13	GAP family protein	GCF_000007865	MAP_RS07205	0		MAP_RS07205	MAP4_RS12095	RC58_RS12070	RE97_RS12085	A0V42_RS07225	CEP84_RS19190	CEG92_RS07420	EC391_RS04210	EC390_RS18515	EGM63_RS22365	EGM64_RS10290	EGM60_RS07180	EGA31_RS08695
1401	13	MbtH family protein	GCF_000007865	MAP_RS07210	0		MAP_RS07210	MAP4_RS12090	RC58_RS12065	RE97_RS12080	A0V42_RS07230	CEP84_RS19185	CEG92_RS07425	EC391_RS04205	EC390_RS18520	EGM63_RS22360	EGM64_RS10295	EGM60_RS07185	EGA31_RS08700
1404	13	N-acetylglutaminylglutamine synthetase	GCF_000007865	MAP_RS07225	0		MAP_RS07225	MAP4_RS12075	RC58_RS12050	RE97_RS12065	A0V42_RS07245	CEP84_RS19170	CEG92_RS07440	EC391_RS04190	EC390_RS18535	EGM63_RS22345	EGM64_RS10310	EGM60_RS07200	EGA31_RS08715
1405	13	MFS transporter	GCF_000007865	MAP_RS07230	0		MAP_RS07230	MAP4_RS12070	RC58_RS12045	RE97_RS12060	A0V42_RS07250	CEP84_RS19165	CEG92_RS07445	EC391_RS04185	EC390_RS18540	EGM63_RS22340	EGM64_RS10315	EGM60_RS07205	EGA31_RS08720
1406	13	hypothetical protein	GCF_000007865	MAP_RS07235	0		MAP_RS07235	MAP4_RS12065	RC58_RS12040	RE97_RS12055	A0V42_RS07255	CEP84_RS19160	CEG92_RS07450	EC391_RS04180	EC390_RS18545	EGM63_RS22335	EGM64_RS10320	EGM60_RS07210	EGA31_RS08725
1407	13	pyrimidine reductase family protein	GCF_000007865	MAP_RS07240	0		MAP_RS07240	MAP4_RS12060	RC58_RS12035	RE97_RS12050	A0V42_RS07260	CEP84_RS19155	CEG92_RS07455	EC391_RS04175	EC390_RS18550	EGM63_RS22330	EGM64_RS10325	EGM60_RS07215	EGA31_RS08730
1408	13	flavin reductase	GCF_000007865	MAP_RS07245	0		MAP_RS07245	MAP4_RS12055	RC58_RS12030	RE97_RS12045	A0V42_RS07265	CEP84_RS19150	CEG92_RS07460	EC391_RS04170	EC390_RS18555	EGM63_RS22325	EGM64_RS10330	EGM60_RS07220	EGA31_RS08735
1409	13	copper oxidase	GCF_000007865	MAP_RS07250	0		MAP_RS07250	MAP4_RS12050	RC58_RS12025	RE97_RS12040	A0V42_RS07270	CEP84_RS19145	CEG92_RS07465	EC391_RS04165	EC390_RS18560	EGM63_RS22320	EGM64_RS10335	EGM60_RS07225	EGA31_RS08740
1411	13	hypothetical protein	GCF_000007865	MAP_RS07260	0		MAP_RS07260	MAP4_RS12040	RC58_RS12015	RE97_RS12030	A0V42_RS07280	CEP84_RS19135	CEG92_RS07475	EC391_RS04155	EC390_RS18570	EGM63_RS22310	EGM64_RS10345	EGM60_RS07235	EGA31_RS08750
1412	13	TIGR03619 family F420-dependent LLM class oxidoreductase	GCF_000007865	MAP_RS07265	0		MAP_RS07265	MAP4_RS12035	RC58_RS12010	RE97_RS12025	A0V42_RS07285	CEP84_RS19130	CEG92_RS07480	EC391_RS04150	EC390_RS18575	EGM63_RS22305	EGM64_RS10350	EGM60_RS07240	EGA31_RS08755
1413	13	PadR family transcriptional regulator	GCF_000007865	MAP_RS07270	0		MAP_RS07270	MAP4_RS12030	RC58_RS12005	RE97_RS12020	A0V42_RS07290	CEP84_RS19125	CEG92_RS07485	EC391_RS04145	EC390_RS18580	EGM63_RS22300	EGM64_RS10355	EGM60_RS07245	EGA31_RS08760
1415	13	FAD-binding protein	GCF_000007865	MAP_RS07280	0		MAP_RS07280	MAP4_RS12020	RC58_RS11995	RE97_RS12005	A0V42_RS07300	CEP84_RS19115	CEG92_RS07495	EC391_RS04135	EC390_RS18590	EGM63_RS22290	EGM64_RS10365	EGM60_RS07255	EGA31_RS08945
1416	13	3-ketosteroid-9-alpha-hydroxylase subunit A	GCF_000007865	MAP_RS07285	0		MAP_RS07285	MAP4_RS12015	RC58_RS11990	RE97_RS12000	A0V42_RS07305	CEP84_RS19110	CEG92_RS07500	EC391_RS04130	EC390_RS18595	EGM63_RS22285	EGM64_RS10370	EGM60_RS07260	EGA31_RS08940
1417	13	hypothetical protein	GCF_000007865	MAP_RS07290	0		MAP_RS07290	MAP4_RS12010	RC58_RS11985	RE97_RS11995	A0V42_RS07310	CEP84_RS19105	CEG92_RS07505	EC391_RS04125	EC390_RS18600	EGM63_RS22280	EGM64_RS10375	EGM60_RS07265	EGA31_RS08935
1418	13	short-chain dehydrogenase	GCF_000007865	MAP_RS07295	0		MAP_RS07295	MAP4_RS12005	RC58_RS11980	RE97_RS11990	A0V42_RS07315	CEP84_RS19100	CEG92_RS07510	EC391_RS04120	EC390_RS18605	EGM63_RS22275	EGM64_RS10380	EGM60_RS07270	EGA31_RS08930
1419	13	NAD(P)-dependent oxidoreductase	GCF_000007865	MAP_RS07300	0		MAP_RS07300	MAP4_RS12000	RC58_RS11975	RE97_RS11985	A0V42_RS07320	CEP84_RS19095	CEG92_RS07515	EC391_RS04115	EC390_RS18610	EGM63_RS22270	EGM64_RS10385	EGM60_RS07275	EGA31_RS08925
1420	13	alpha/beta hydrolase	GCF_000007865	MAP_RS07310	0		MAP_RS07310	MAP4_RS11990	RC58_RS11965	RE97_RS11975	A0V42_RS07330	CEP84_RS19085	CEG92_RS07525	EC391_RS04105	EC390_RS18620	EGM63_RS22260	EGM64_RS10395	EGM60_RS07285	EGA31_RS08915
1421	13	SDR family oxidoreductase	GCF_000007865	MAP_RS07315	0		MAP_RS07315	MAP4_RS11985	RC58_RS11960	RE97_RS11970	A0V42_RS07335	CEP84_RS19080	CEG92_RS07530	EC391_RS04100	EC390_RS18625	EGM63_RS22255	EGM64_RS10400	EGM60_RS07290	EGA31_RS08910
1422	13	polyketide cyclase	GCF_000007865	MAP_RS07320	0		MAP_RS07320	MAP4_RS11980	RC58_RS11955	RE97_RS11965	A0V42_RS07340	CEP84_RS19075	CEG92_RS07535	EC391_RS04095	EC390_RS18630	EGM63_RS22250	EGM64_RS10405	EGM60_RS07295	EGA31_RS08905
1423	13	FAD-binding protein	GCF_000835225	RC58_RS11950	0		MAP_RS07325	MAP4_RS11975	RC58_RS11950	RE97_RS11960	A0V42_RS07345	CEP84_RS19070	CEG92_RS07540	EC391_RS04090	EC390_RS18635	EGM63_RS22245	EGM64_RS10410	EGM60_RS07300	EGA31_RS08900
1424	13	NAD(P)-dependent oxidoreductase	GCF_000007865	MAP_RS07330	0		MAP_RS07330	MAP4_RS11970	RC58_RS11945	RE97_RS11955	A0V42_RS07350	CEP84_RS19065	CEG92_RS07545	EC391_RS04085	EC390_RS18640	EGM63_RS22240	EGM64_RS10415	EGM60_RS07305	EGA31_RS08895
1425	13	stress responsive protein	GCF_000007865	MAP_RS07335	0		MAP_RS07335	MAP4_RS11965	RC58_RS11940	RE97_RS11950	A0V42_RS07355	CEP84_RS19060	CEG92_RS07550	EC391_RS04080	EC390_RS18645	EGM63_RS22235	EGM64_RS10420	EGM60_RS07310	EGA31_RS08890
1426	13	hypothetical protein	GCF_000007865	MAP_RS07340	0		MAP_RS07340	MAP4_RS11960	RC58_RS11935	RE97_RS11945	A0V42_RS07360	CEP84_RS19055	CEG92_RS07555	EC391_RS04075	EC390_RS18650	EGM63_RS22230	EGM64_RS10425	EGM60_RS07315	EGA31_RS08885
1428	13	IclR family transcriptional regulator	GCF_000007865	MAP_RS07350	0		MAP_RS07350	MAP4_RS11950	RC58_RS11925	RE97_RS11935	A0V42_RS07370	CEP84_RS19045	CEG92_RS07565	EC391_RS04065	EC390_RS18660	EGM63_RS22220	EGM64_RS10435	EGM60_RS07325	EGA31_RS08875
1429	13	FAD-binding protein	GCF_000007865	MAP_RS07355	0		MAP_RS07355	MAP4_RS11945	RC58_RS11920	RE97_RS11930	A0V42_RS07375	CEP84_RS19040	CEG92_RS07570	EC391_RS04060	EC390_RS18665	EGM63_RS22215	EGM64_RS10440	EGM60_RS07330	EGA31_RS08870
1431	13	NAD(P)-dependent oxidoreductase	GCF_000007865	MAP_RS07370	0		MAP_RS07370	MAP4_RS11930	RC58_RS11905	RE97_RS11915	A0V42_RS07390	CEP84_RS19025	CEG92_RS07585	EC391_RS04045	EC390_RS18680	EGM63_RS22200	EGM64_RS10455	EGM60_RS07345	EGA31_RS08855
1432	13	NAD(P)/FAD-dependent oxidoreductase	GCF_000007865	MAP_RS07375	0		MAP_RS07375	MAP4_RS11925	RC58_RS11900	RE97_RS11910	A0V42_RS07395	CEP84_RS19020	CEG92_RS07590	EC391_RS04040	EC390_RS18685	EGM63_RS22195	EGM64_RS10460	EGM60_RS07350	EGA31_RS08850
1433	13	NAD(P)-dependent oxidoreductase	GCF_000007865	MAP_RS07380	0		MAP_RS07380	MAP4_RS11920	RC58_RS11895	RE97_RS11905	A0V42_RS07400	CEP84_RS19015	CEG92_RS07595	EC391_RS04035	EC390_RS18690	EGM63_RS22190	EGM64_RS10465	EGM60_RS07355	EGA31_RS08845
1434	13	alpha/beta hydrolase	GCF_000007865	MAP_RS07385	0		MAP_RS07385	MAP4_RS11915	RC58_RS11890	RE97_RS11900	A0V42_RS07405	CEP84_RS19010	CEG92_RS07600	EC391_RS04030	EC390_RS18695	EGM63_RS22185	EGM64_RS10470	EGM60_RS07360	EGA31_RS08840
1435	13	wax ester/triacylglycerol synthase family O-acyltransferase	GCF_000007865	MAP_RS07390	0		MAP_RS07390	MAP4_RS11910	RC58_RS11885	RE97_RS11895	A0V42_RS07410	CEP84_RS19005	CEG92_RS07605	EC391_RS04025	EC390_RS18700	EGM63_RS22180	EGM64_RS10475	EGM60_RS07365	EGA31_RS08835
1436	13	CsbD family protein	GCF_000007865	MAP_RS07395	0		MAP_RS07395	MAP4_RS11905	RC58_RS11880	RE97_RS11890	A0V42_RS07415	CEP84_RS18995	CEG92_RS07615	EC391_RS04015	EC390_RS18710	EGM63_RS22170	EGM64_RS10485	EGM60_RS07375	EGA31_RS08825
1437	13	NAD(P)-dependent oxidoreductase	GCF_000007865	MAP_RS07400	0		MAP_RS07400	MAP4_RS11900	RC58_RS11875	RE97_RS11885	A0V42_RS07420	CEP84_RS18990	CEG92_RS07620	EC391_RS04010	EC390_RS18715	EGM63_RS22165	EGM64_RS10490	EGM60_RS07380	EGA31_RS08820
1438	13	putative esteraselipase	GCF_000007865	MAP_RS07405	0		MAP_RS07405	MAP4_RS11895	RC58_RS11870	RE97_RS11880	A0V42_RS07425	CEP84_RS18985	CEG92_RS07625	EC391_RS04005	EC390_RS18720	EGM63_RS22160	EGM64_RS10495	EGM60_RS07385	EGA31_RS08815
1440	13	acyl-CoA dehydrogenase	GCF_000007865	MAP_RS07420	0		MAP_RS07420	MAP4_RS11880	RC58_RS11855	RE97_RS11865	A0V42_RS07440	CEP84_RS18970	CEG92_RS07640	EC391_RS03990	EC390_RS18735	EGM63_RS22145	EGM64_RS10510	EGM60_RS07400	EGA31_RS08800
1441	13	acyl dehydratase	GCF_000007865	MAP_RS07425	0		MAP_RS07425	MAP4_RS11875	RC58_RS11850	RE97_RS11860	A0V42_RS07445	CEP84_RS18965	CEG92_RS07645	EC391_RS03985	EC390_RS18740	EGM63_RS22140	EGM64_RS10515	EGM60_RS07405	EGA31_RS08795
1442	13	acyl dehydratase	GCF_000007865	MAP_RS07430	0		MAP_RS07430	MAP4_RS11870	RC58_RS11845	RE97_RS11855	A0V42_RS07450	CEP84_RS18960	CEG92_RS07650	EC391_RS03980	EC390_RS18745	EGM63_RS22135	EGM64_RS10520	EGM60_RS07410	EGA31_RS08790
1443	13	thiolase family protein	GCF_000007865	MAP_RS07435	0		MAP_RS07435	MAP4_RS11865	RC58_RS11840	RE97_RS11850	A0V42_RS07455	CEP84_RS18955	CEG92_RS07655	EC391_RS03975	EC390_RS18750	EGM63_RS22130	EGM64_RS10525	EGM60_RS07415	EGA31_RS08785
1444	13	acyl dehydratase	GCF_000007865	MAP_RS07440	0		MAP_RS07440	MAP4_RS11860	RC58_RS11835	RE97_RS11845	A0V42_RS07460	CEP84_RS18950	CEG92_RS07660	EC391_RS03970	EC390_RS18755	EGM63_RS22125	EGM64_RS10530	EGM60_RS07420	EGA31_RS08780
1445	13	NAD(P)/FAD-dependent oxidoreductase	GCF_000007865	MAP_RS07445	0		MAP_RS07445	MAP4_RS11855	RC58_RS11830	RE97_RS11840	A0V42_RS07465	CEP84_RS18945	CEG92_RS07665	EC391_RS03965	EC390_RS18760	EGM63_RS22120	EGM64_RS10535	EGM60_RS07425	EGA31_RS08775
1446	13	acyl-CoA synthetase	GCF_000007865	MAP_RS07450	0		MAP_RS07450	MAP4_RS11850	RC58_RS11825	RE97_RS11835	A0V42_RS07470	CEP84_RS18940	CEG92_RS07670	EC391_RS03960	EC390_RS18765	EGM63_RS22115	EGM64_RS10540	EGM60_RS07430	EGA31_RS08770
1449	13	aminopeptidase P family protein	GCF_000007865	MAP_RS07465	0		MAP_RS07465	MAP4_RS11835	RC58_RS11810	RE97_RS11820	A0V42_RS07485	CEP84_RS18925	CEG92_RS07685	EC391_RS03945	EC390_RS18780	EGM63_RS22100	EGM64_RS10555	EGM60_RS07445	EGA31_RS09075
1450	13	short chain dehydrogenase	GCF_000007865	MAP_RS07470	0		MAP_RS07470	MAP4_RS11830	RC58_RS11805	RE97_RS11815	A0V42_RS07490	CEP84_RS18920	CEG92_RS07690	EC391_RS03940	EC390_RS18785	EGM63_RS22095	EGM64_RS10560	EGM60_RS07450	EGA31_RS09080
1451	13	cytochrome P450	GCF_000007865	MAP_RS07475	0		MAP_RS07475	MAP4_RS11825	RC58_RS11800	RE97_RS11810	A0V42_RS07495	CEP84_RS18915	CEG92_RS07695	EC391_RS03935	EC390_RS18790	EGM63_RS22090	EGM64_RS10565	EGM60_RS07455	EGA31_RS09085
1452	13	TetR family transcriptional regulator	GCF_000007865	MAP_RS07480	0		MAP_RS07480	MAP4_RS11820	RC58_RS11795	RE97_RS11805	A0V42_RS07500	CEP84_RS18910	CEG92_RS07700	EC391_RS03930	EC390_RS18795	EGM63_RS22085	EGM64_RS10570	EGM60_RS07460	EGA31_RS09090
1453	13	nitroreductase family deazaflavin-dependent oxidoreductase	GCF_000007865	MAP_RS07485	0		MAP_RS07485	MAP4_RS11815	RC58_RS11790	RE97_RS11800	A0V42_RS07505	CEP84_RS18905	CEG92_RS07705	EC391_RS03925	EC390_RS18800	EGM63_RS22080	EGM64_RS10575	EGM60_RS07465	EGA31_RS09095
1454	13	hypothetical protein	GCF_000007865	MAP_RS07490	0		MAP_RS07490	MAP4_RS11810	RC58_RS11785	RE97_RS11795	A0V42_RS07510	CEP84_RS18900	CEG92_RS07710	EC391_RS03920	EC390_RS18805	EGM63_RS22075	EGM64_RS10580	EGM60_RS07470	EGA31_RS09100
1455	13	hypothetical protein	GCF_000007865	MAP_RS07495	0		MAP_RS07495	MAP4_RS11805	RC58_RS11780	RE97_RS11790	A0V42_RS07515	CEP84_RS18895	CEG92_RS07715	EC391_RS03915	EC390_RS18810	EGM63_RS22070	EGM64_RS10585	EGM60_RS07475	EGA31_RS09105
1456	13	RNA polymerase sigma factor SigF	GCF_000007865	MAP_RS07500	0		MAP_RS07500	MAP4_RS11800	RC58_RS11775	RE97_RS11785	A0V42_RS07520	CEP84_RS18890	CEG92_RS07720	EC391_RS03910	EC390_RS18815	EGM63_RS22065	EGM64_RS10590	EGM60_RS07480	EGA31_RS09110
1458	13	cutinase family protein	GCF_000007865	MAP_RS07510	0		MAP_RS07510	MAP4_RS11790	RC58_RS11765	RE97_RS11775	A0V42_RS07530	CEP84_RS18880	CEG92_RS07730	EC391_RS03900	EC390_RS18825	EGM63_RS22055	EGM64_RS10600	EGM60_RS07490	EGA31_RS09120
1459	13	TetR/AcrR family transcriptional regulator	GCF_000007865	MAP_RS07515	0		MAP_RS07515	MAP4_RS11785	RC58_RS11760	RE97_RS11770	A0V42_RS07535	CEP84_RS18875	CEG92_RS07735	EC391_RS03895	EC390_RS18830	EGM63_RS22050	EGM64_RS10605	EGM60_RS07495	EGA31_RS09125
1460	13	N-acyl-D-glutamate deacylase	GCF_000007865	MAP_RS07520	0		MAP_RS07520	MAP4_RS11780	RC58_RS11755	RE97_RS11765	A0V42_RS07540	CEP84_RS18870	CEG92_RS07740	EC391_RS03890	EC390_RS18835	EGM63_RS22045	EGM64_RS10610	EGM60_RS07500	EGA31_RS09130
1461	13	TetR/AcrR family transcriptional regulator	GCF_000007865	MAP_RS07525	0		MAP_RS07525	MAP4_RS11775	RC58_RS11750	RE97_RS11760	A0V42_RS07545	CEP84_RS18865	CEG92_RS07745	EC391_RS03885	EC390_RS18840	EGM63_RS22040	EGM64_RS10615	EGM60_RS07505	EGA31_RS09135
1462	13	class I SAM-dependent methyltransferase	GCF_000007865	MAP_RS07530	0		MAP_RS07530	MAP4_RS11770	RC58_RS11745	RE97_RS11755	A0V42_RS07550	CEP84_RS18860	CEG92_RS07750	EC391_RS03880	EC390_RS18845	EGM63_RS22035	EGM64_RS10620	EGM60_RS07510	EGA31_RS09140
1464	13	hypothetical protein	GCF_000007865	MAP_RS07540	0		MAP_RS07540	MAP4_RS11760	RC58_RS11735	RE97_RS11745	A0V42_RS07560	CEP84_RS18850	CEG92_RS07760	EC391_RS03870	EC390_RS18855	EGM63_RS22025	EGM64_RS10630	EGM60_RS07520	EGA31_RS09150
1465	13	FAD-binding protein	GCF_000390085	MAP4_RS11755	0		MAP_RS07545	MAP4_RS11755	RC58_RS11730	RE97_RS11740	A0V42_RS07565	CEP84_RS18845	CEG92_RS07765	EC391_RS03865	EC390_RS18860	EGM63_RS22020	EGM64_RS10635	EGM60_RS07525	EGA31_RS09155
1466	13	aromatic ring-hydroxylating dioxygenase subunit alpha	GCF_000007865	MAP_RS07550	0	FG-In	MAP_RS07550	MAP4_RS11750	RC58_RS11725	RE97_RS11735	A0V42_RS07570	CEP84_RS18840	CEG92_RS07770	EC391_RS03860	EC390_RS18865	EGM63_RS22015	EGM64_RS10640	EGM60_RS07530	EGA31_RS09160
1472	13	transcription antitermination regulator	GCF_000007865	MAP_RS07595	0		MAP_RS07595	MAP4_RS11705	RC58_RS11680	RE97_RS11690	A0V42_RS07615	CEP84_RS18800	CEG92_RS07810	EC391_RS03820	EC390_RS18905	EGM63_RS21975	EGM64_RS10680	EGM60_RS07570	EGA31_RS09170
1473	13	DUF4407 domain-containing protein	GCF_000390085	MAP4_RS11700	0		MAP_RS07600	MAP4_RS11700	RC58_RS11675	RE97_RS11685	A0V42_RS07620	CEP84_RS18795	CEG92_RS07815	EC391_RS03815	EC390_RS18910	EGM63_RS21970	EGM64_RS10685	EGM60_RS07575	EGA31_RS09175
1474	13	hypothetical protein	GCF_000007865	MAP_RS07605	0		MAP_RS07605	MAP4_RS11695	RC58_RS11670	RE97_RS11680	A0V42_RS07625	CEP84_RS18790	CEG92_RS07820	EC391_RS03810	EC390_RS18915	EGM63_RS21965	EGM64_RS10690	EGM60_RS07580	EGA31_RS09180
1475	13	SRPBCC family protein	GCF_000007865	MAP_RS07610	0		MAP_RS07610	MAP4_RS11690	RC58_RS11665	RE97_RS11675	A0V42_RS07630	CEP84_RS18785	CEG92_RS07825	EC391_RS03805	EC390_RS18920	EGM63_RS21960	EGM64_RS10695	EGM60_RS07585	EGA31_RS09185
1476	13	hypothetical protein	GCF_000007865	MAP_RS07615	0		MAP_RS07615	MAP4_RS11685	RC58_RS11660	RE97_RS11670	A0V42_RS07635	CEP84_RS18780	CEG92_RS07830	EC391_RS03800	EC390_RS18925	EGM63_RS21955	EGM64_RS10700	EGM60_RS07590	EGA31_RS09190
1477	13	oxidoreductase	GCF_000007865	MAP_RS07620	0		MAP_RS07620	MAP4_RS11680	RC58_RS11655	RE97_RS11665	A0V42_RS07640	CEP84_RS18775	CEG92_RS07835	EC391_RS03795	EC390_RS18930	EGM63_RS21950	EGM64_RS10705	EGM60_RS07595	EGA31_RS09195
1479	13	TIGR03619 family F420-dependent LLM class oxidoreductase	GCF_000007865	MAP_RS07630	0		MAP_RS07630	MAP4_RS11670	RC58_RS11645	RE97_RS11655	A0V42_RS07650	CEP84_RS18765	CEG92_RS07845	EC391_RS03785	EC390_RS18940	EGM63_RS21940	EGM64_RS10715	EGM60_RS07605	EGA31_RS09205
1480	13	4-alpha-glucanotransferase	GCF_000007865	MAP_RS07635	0		MAP_RS07635	MAP4_RS11665	RC58_RS11640	RE97_RS11650	A0V42_RS07655	CEP84_RS18760	CEG92_RS07850	EC391_RS03780	EC390_RS18945	EGM63_RS21935	EGM64_RS10720	EGM60_RS07610	EGA31_RS09210
1481	13	type VII secretion protein EccB	GCF_000007865	MAP_RS07640	0		MAP_RS07640	MAP4_RS11660	RC58_RS11635	RE97_RS11645	A0V42_RS07660	CEP84_RS18755	CEG92_RS07855	EC391_RS03775	EC390_RS18950	EGM63_RS21930	EGM64_RS10725	EGM60_RS07615	EGA31_RS09215
1483	13	ferredoxin	GCF_000007865	MAP_RS07655	0		MAP_RS07655	MAP4_RS11645	RC58_RS11620	RE97_RS11630	A0V42_RS07675	CEP84_RS18740	CEG92_RS07870	EC391_RS03760	EC390_RS18965	EGM63_RS21915	EGM64_RS10740	EGM60_RS07630	EGA31_RS09230
1484	13	PPE family protein	GCF_000390085	MAP4_RS11640	0		MAP_RS07660	MAP4_RS11640	RC58_RS11615	RE97_RS11625	A0V42_RS07680	CEP84_RS18735	CEG92_RS07875	EC391_RS03755	EC390_RS18970	EGM63_RS21910	EGM64_RS10745	EGM60_RS07635	EGA31_RS09235
1485	13	hypothetical protein	GCF_000007865	MAP_RS07665	0		MAP_RS07665	MAP4_RS11635	RC58_RS11610	RE97_RS11620	A0V42_RS07685	CEP84_RS18730	CEG92_RS07880	EC391_RS03750	EC390_RS18975	EGM63_RS21905	EGM64_RS10750	EGM60_RS07640	EGA31_RS09240
1487	13	PE family protein	GCF_000007865	MAP_RS07675	0		MAP_RS07675	MAP4_RS11625	RC58_RS11600	RE97_RS11610	A0V42_RS07695	CEP84_RS18720	CEG92_RS07890	EC391_RS03740	EC390_RS18985	EGM63_RS21895	EGM64_RS10760	EGM60_RS07650	EGA31_RS09250
1489	13	hypothetical protein	GCF_000007865	MAP_RS07685	0		MAP_RS07685	MAP4_RS11615	RC58_RS22745	RE97_RS11605	A0V42_RS07705	CEP84_RS18710	CEG92_RS07900	EC391_RS03730	EC390_RS18995	EGM63_RS21885	EGM64_RS10770	EGM60_RS07660	EGA31_RS09260
1490	13	ESX secretion-associated protein EspG	GCF_000007865	MAP_RS07690	0		MAP_RS07690	MAP4_RS11610	RC58_RS11585	RE97_RS11600	A0V42_RS07710	CEP84_RS18705	CEG92_RS07905	EC391_RS03725	EC390_RS19000	EGM63_RS21880	EGM64_RS10775	EGM60_RS07665	EGA31_RS09265
1491	13	type VII secretion integral membrane protein EccD	GCF_000007865	MAP_RS07695	0		MAP_RS07695	MAP4_RS11605	RC58_RS11580	RE97_RS11595	A0V42_RS07715	CEP84_RS18700	CEG92_RS07910	EC391_RS03720	EC390_RS19005	EGM63_RS21875	EGM64_RS10780	EGM60_RS07670	EGA31_RS09270
1493	13	type VII secretion protein EccE	GCF_000007865	MAP_RS07705	0		MAP_RS07705	MAP4_RS11595	RC58_RS11570	RE97_RS11585	A0V42_RS07725	CEP84_RS18690	CEG92_RS07920	EC391_RS03710	EC390_RS19015	EGM63_RS21865	EGM64_RS10790	EGM60_RS07680	EGA31_RS09280
1494	13	type VII secretion system ESX-5 AAA family ATPase EccA5	GCF_000007865	MAP_RS07710	0		MAP_RS07710	MAP4_RS11590	RC58_RS11565	RE97_RS11580	A0V42_RS07730	CEP84_RS18685	CEG92_RS07925	EC391_RS03705	EC390_RS19020	EGM63_RS21860	EGM64_RS10795	EGM60_RS07685	EGA31_RS09285
1495	13	PE family protein	GCF_000007865	MAP_RS07715	0		MAP_RS07715	MAP4_RS11585	RC58_RS11560	RE97_RS11575	A0V42_RS07735	CEP84_RS18680	CEG92_RS07930	EC391_RS03700	EC390_RS19025	EGM63_RS21855	EGM64_RS10800	EGM60_RS07690	EGA31_RS09290
1497	13	PPE family protein	GCF_000007865	MAP_RS07725	0		MAP_RS07725	MAP4_RS11575	RC58_RS11555	RE97_RS11565	A0V42_RS07745	CEP84_RS18670	CEG92_RS07940	EC391_RS03690	EC390_RS19035	EGM63_RS21845	EGM64_RS10810	EGM60_RS07700	EGA31_RS09300
1498	13	DUF732 domain-containing protein	GCF_000007865	MAP_RS07730	0		MAP_RS07730	MAP4_RS11570	RC58_RS11550	RE97_RS11560	A0V42_RS07750	CEP84_RS18665	CEG92_RS07945	EC391_RS03685	EC390_RS19040	EGM63_RS21840	EGM64_RS10815	EGM60_RS07705	EGA31_RS09305
1499	13	PPE family protein	GCF_000007865	MAP_RS07735	0		MAP_RS07735	MAP4_RS11565	RC58_RS11545	RE97_RS11555	A0V42_RS07755	CEP84_RS18660	CEG92_RS07950	EC391_RS03680	EC390_RS19045	EGM63_RS21835	EGM64_RS10820	EGM60_RS07710	EGA31_RS09310
1500	13	PPE family protein	GCF_000007865	MAP_RS07740	0		MAP_RS07740	MAP4_RS11560	RC58_RS11540	RE97_RS11550	A0V42_RS07760	CEP84_RS18655	CEG92_RS07955	EC391_RS03675	EC390_RS19050	EGM63_RS21830	EGM64_RS10825	EGM60_RS07715	EGA31_RS09315
1501	13	DUF732 domain-containing protein	GCF_000007865	MAP_RS07745	0		MAP_RS07745	MAP4_RS11555	RC58_RS11535	RE97_RS11545	A0V42_RS07765	CEP84_RS18650	CEG92_RS07960	EC391_RS03670	EC390_RS19055	EGM63_RS21825	EGM64_RS10830	EGM60_RS07720	EGA31_RS09320
1502	13	DUF732 domain-containing protein	GCF_000007865	MAP_RS07750	0		MAP_RS07750	MAP4_RS11550	RC58_RS11530	RE97_RS11540	A0V42_RS07770	CEP84_RS18645	CEG92_RS07965	EC391_RS03665	EC390_RS19060	EGM63_RS21820	EGM64_RS10835	EGM60_RS07725	EGA31_RS09325
1503	13	PPE family protein	GCF_000007865	MAP_RS07755	0		MAP_RS07755	MAP4_RS11545	RC58_RS11525	RE97_RS11535	A0V42_RS07775	CEP84_RS18640	CEG92_RS07970	EC391_RS03660	EC390_RS19065	EGM63_RS21815	EGM64_RS10840	EGM60_RS07730	EGA31_RS09330
1505	13	DUF732 domain-containing protein	GCF_000007865	MAP_RS07765	0		MAP_RS07765	MAP4_RS11535	RC58_RS11515	RE97_RS11525	A0V42_RS07785	CEP84_RS18630	CEG92_RS07980	EC391_RS03650	EC390_RS19075	EGM63_RS21805	EGM64_RS10850	EGM60_RS07740	EGA31_RS09340
1506	13	MgtC/SapB family protein	GCF_000007865	MAP_RS07770	0		MAP_RS07770	MAP4_RS11530	RC58_RS11510	RE97_RS11520	A0V42_RS07790	CEP84_RS18625	CEG92_RS07985	EC391_RS03645	EC390_RS19080	EGM63_RS21800	EGM64_RS10855	EGM60_RS07745	EGA31_RS09345
1507	13	sterol desaturase family protein	GCF_000007865	MAP_RS07775	0		MAP_RS07775	MAP4_RS11525	RC58_RS11505	RE97_RS11515	A0V42_RS07795	CEP84_RS18620	CEG92_RS07990	EC391_RS03640	EC390_RS19085	EGM63_RS21795	EGM64_RS10860	EGM60_RS07750	EGA31_RS09350
1508	13	hypothetical protein	GCF_000007865	MAP_RS07780	0		MAP_RS07780	MAP4_RS11520	RC58_RS11500	RE97_RS11510	A0V42_RS07800	CEP84_RS18615	CEG92_RS07995	EC391_RS03635	EC390_RS19090	EGM63_RS21790	EGM64_RS10865	EGM60_RS07755	EGA31_RS09355
1509	13	DUF385 domain-containing protein	GCF_000007865	MAP_RS07785	0		MAP_RS07785	MAP4_RS11515	RC58_RS11495	RE97_RS11505	A0V42_RS07805	CEP84_RS18610	CEG92_RS08000	EC391_RS03630	EC390_RS19095	EGM63_RS21785	EGM64_RS10870	EGM60_RS07760	EGA31_RS09360
1510	13	TetR/AcrR family transcriptional regulator	GCF_000007865	MAP_RS07790	0		MAP_RS07790	MAP4_RS11510	RC58_RS11490	RE97_RS11500	A0V42_RS07810	CEP84_RS18605	CEG92_RS08005	EC391_RS03625	EC390_RS19100	EGM63_RS21780	EGM64_RS10875	EGM60_RS07765	EGA31_RS09365
1511	13	VOC family protein	GCF_000007865	MAP_RS07795	0		MAP_RS07795	MAP4_RS11505	RC58_RS11485	RE97_RS11495	A0V42_RS07815	CEP84_RS18600	CEG92_RS08010	EC391_RS03620	EC390_RS19105	EGM63_RS21775	EGM64_RS10880	EGM60_RS07770	EGA31_RS09370
1512	13	FAD-binding protein	GCF_000007865	MAP_RS07800	0		MAP_RS07800	MAP4_RS11500	RC58_RS11480	RE97_RS11490	A0V42_RS07820	CEP84_RS18595	CEG92_RS08015	EC391_RS03615	EC390_RS19110	EGM63_RS21770	EGM64_RS10885	EGM60_RS07775	EGA31_RS09375
1513	13	ABC transporter ATP-binding protein/permease	GCF_000007865	MAP_RS07805	0		MAP_RS07805	MAP4_RS11495	RC58_RS11475	RE97_RS11485	A0V42_RS07825	CEP84_RS18590	CEG92_RS08020	EC391_RS03610	EC390_RS19115	EGM63_RS21765	EGM64_RS10890	EGM60_RS07780	EGA31_RS09380
1514	13	accessory Sec system translocase SecA2	GCF_000007865	MAP_RS07815	0		MAP_RS07815	MAP4_RS11485	RC58_RS11465	RE97_RS11475	A0V42_RS07835	CEP84_RS18580	CEG92_RS08030	EC391_RS03600	EC390_RS19125	EGM63_RS21755	EGM64_RS10900	EGM60_RS07790	EGA31_RS09390
1515	13	CDP-alcohol phosphatidyltransferase family protein	GCF_000007865	MAP_RS07820	0		MAP_RS07820	MAP4_RS11480	RC58_RS11460	RE97_RS11470	A0V42_RS07840	CEP84_RS18575	CEG92_RS08035	EC391_RS03595	EC390_RS19130	EGM63_RS21750	EGM64_RS10905	EGM60_RS07795	EGA31_RS09395
1516	13	DUF881 domain-containing protein	GCF_000007865	MAP_RS07825	0		MAP_RS07825	MAP4_RS11475	RC58_RS11455	RE97_RS11465	A0V42_RS07845	CEP84_RS18570	CEG92_RS08040	EC391_RS03590	EC390_RS19135	EGM63_RS21745	EGM64_RS10910	EGM60_RS07800	EGA31_RS09400
1517	13	DUF1290 domain-containing protein	GCF_000007865	MAP_RS07830	0		MAP_RS07830	MAP4_RS11470	RC58_RS11450	RE97_RS11460	A0V42_RS07850	CEP84_RS18565	CEG92_RS08045	EC391_RS03585	EC390_RS19140	EGM63_RS21740	EGM64_RS10915	EGM60_RS07805	EGA31_RS09405
1518	13	DUF881 domain-containing protein	GCF_000007865	MAP_RS07835	0		MAP_RS07835	MAP4_RS11465	RC58_RS11445	RE97_RS11455	A0V42_RS07855	CEP84_RS18560	CEG92_RS08050	EC391_RS03580	EC390_RS19145	EGM63_RS21735	EGM64_RS10920	EGM60_RS07810	EGA31_RS09410
1519	13	glycine cleavage system protein H	GCF_000007865	MAP_RS07840	0		MAP_RS07840	MAP4_RS11460	RC58_RS11440	RE97_RS11450	A0V42_RS07860	CEP84_RS18555	CEG92_RS08055	EC391_RS03575	EC390_RS19150	EGM63_RS21730	EGM64_RS10925	EGM60_RS07815	EGA31_RS09415
1520	13	peptide-binding protein	GCF_000007865	MAP_RS07845	0		MAP_RS07845	MAP4_RS11455	RC58_RS11435	RE97_RS11445	A0V42_RS07865	CEP84_RS18550	CEG92_RS08060	EC391_RS03570	EC390_RS19155	EGM63_RS21725	EGM64_RS10930	EGM60_RS07820	EGA31_RS09420
1521	13	MerR family transcriptional regulator	GCF_000007865	MAP_RS07850	0		MAP_RS07850	MAP4_RS11450	RC58_RS11430	RE97_RS11440	A0V42_RS07870	CEP84_RS18545	CEG92_RS08065	EC391_RS03565	EC390_RS19160	EGM63_RS21720	EGM64_RS10935	EGM60_RS07825	EGA31_RS09425
1522	13	bifunctional nuclease family protein	GCF_000007865	MAP_RS07855	0		MAP_RS07855	MAP4_RS11445	RC58_RS11425	RE97_RS11435	A0V42_RS07875	CEP84_RS18540	CEG92_RS08070	EC391_RS03560	EC390_RS19165	EGM63_RS21715	EGM64_RS10940	EGM60_RS07830	EGA31_RS09430
1523	13	MerR family transcriptional regulator	GCF_000007865	MAP_RS07860	0		MAP_RS07860	MAP4_RS11440	RC58_RS11420	RE97_RS11430	A0V42_RS07880	CEP84_RS18535	CEG92_RS08075	EC391_RS03555	EC390_RS19170	EGM63_RS21710	EGM64_RS10945	EGM60_RS07835	EGA31_RS09435
1524	13	glycine dehydrogenase	GCF_000007865	MAP_RS07865	0		MAP_RS07865	MAP4_RS11435	RC58_RS11415	RE97_RS11425	A0V42_RS07885	CEP84_RS18530	CEG92_RS08080	EC391_RS03550	EC390_RS19175	EGM63_RS21705	EGM64_RS10950	EGM60_RS07840	EGA31_RS09440
1526	13	DUF2236 domain-containing protein	GCF_000007865	MAP_RS07875	0		MAP_RS07875	MAP4_RS11425	RC58_RS11405	RE97_RS11415	A0V42_RS07895	CEP84_RS18520	CEG92_RS08090	EC391_RS03540	EC390_RS19185	EGM63_RS21695	EGM64_RS10960	EGM60_RS07850	EGA31_RS09450
1527	13	hypothetical protein	GCF_000007865	MAP_RS07880	0		MAP_RS07880	MAP4_RS11420	RC58_RS11400	RE97_RS11410	A0V42_RS07900	CEP84_RS18515	CEG92_RS08095	EC391_RS03535	EC390_RS19190	EGM63_RS21690	EGM64_RS10965	EGM60_RS07855	EGA31_RS09455
1528	13	malate synthase G	GCF_000007865	MAP_RS07885	0		MAP_RS07885	MAP4_RS11415	RC58_RS11395	RE97_RS11405	A0V42_RS07905	CEP84_RS18510	CEG92_RS08100	EC391_RS03530	EC390_RS19195	EGM63_RS21685	EGM64_RS10970	EGM60_RS07860	EGA31_RS09460
1529	13	HlyC/CorC family transporter	GCF_000007865	MAP_RS07890	0		MAP_RS07890	MAP4_RS11410	RC58_RS11390	RE97_RS11400	A0V42_RS07910	CEP84_RS18505	CEG92_RS08105	EC391_RS03525	EC390_RS19200	EGM63_RS21680	EGM64_RS10975	EGM60_RS07865	EGA31_RS09465
1530	13	HlyC/CorC family transporter	GCF_000007865	MAP_RS07895	0		MAP_RS07895	MAP4_RS11405	RC58_RS11385	RE97_RS11395	A0V42_RS07915	CEP84_RS18500	CEG92_RS08110	EC391_RS03520	EC390_RS19205	EGM63_RS21675	EGM64_RS10980	EGM60_RS07870	EGA31_RS09470
1531	13	acyl-CoA dehydrogenase	GCF_000007865	MAP_RS07905	0		MAP_RS07905	MAP4_RS11395	RC58_RS11375	RE97_RS11385	A0V42_RS07925	CEP84_RS18490	CEG92_RS08120	EC391_RS03510	EC390_RS19215	EGM63_RS21665	EGM64_RS10990	EGM60_RS07880	EGA31_RS09480
1532	13	long-chain-fatty-acid--ACP ligase	GCF_000007865	MAP_RS07910	0		MAP_RS07910	MAP4_RS11390	RC58_RS11370	RE97_RS11380	A0V42_RS07930	CEP84_RS18485	CEG92_RS08125	EC391_RS03505	EC390_RS19220	EGM63_RS21660	EGM64_RS10995	EGM60_RS07885	EGA31_RS09485
1534	13	GuaB1 family IMP dehydrogenase-related protein	GCF_000007865	MAP_RS07920	0		MAP_RS07920	MAP4_RS11380	RC58_RS11360	RE97_RS11370	A0V42_RS07940	CEP84_RS18475	CEG92_RS08135	EC391_RS03495	EC390_RS19230	EGM63_RS21650	EGM64_RS11005	EGM60_RS07895	EGA31_RS09495
1535	13	phosphogluconate dehydrogenase (NADP(+)-dependent, decarboxylating)	GCF_000007865	MAP_RS07925	0		MAP_RS07925	MAP4_RS11375	RC58_RS11355	RE97_RS11365	A0V42_RS07945	CEP84_RS18470	CEG92_RS08140	EC391_RS03490	EC390_RS19235	EGM63_RS21645	EGM64_RS11010	EGM60_RS07900	EGA31_RS09500
1537	13	transcriptional regulator	GCF_000007865	MAP_RS07935	0		MAP_RS07935	MAP4_RS11365	RC58_RS11345	RE97_RS11355	A0V42_RS07955	CEP84_RS18460	CEG92_RS08150	EC391_RS03480	EC390_RS19245	EGM63_RS21635	EGM64_RS11020	EGM60_RS07910	EGA31_RS09510
1538	13	PaaI family thioesterase	GCF_000007865	MAP_RS07940	0		MAP_RS07940	MAP4_RS11360	RC58_RS11340	RE97_RS11350	A0V42_RS07960	CEP84_RS18455	CEG92_RS08155	EC391_RS03475	EC390_RS19250	EGM63_RS21630	EGM64_RS11025	EGM60_RS07915	EGA31_RS09515
1539	13	NAD(P)/FAD-dependent oxidoreductase	GCF_000007865	MAP_RS07945	0		MAP_RS07945	MAP4_RS11355	RC58_RS11335	RE97_RS11345	A0V42_RS07965	CEP84_RS18450	CEG92_RS08160	EC391_RS03470	EC390_RS19255	EGM63_RS21625	EGM64_RS11030	EGM60_RS07920	EGA31_RS09520
1540	13	DUF4189 domain-containing protein	GCF_000007865	MAP_RS07950	0		MAP_RS07950	MAP4_RS11350	RC58_RS11330	RE97_RS11340	A0V42_RS07970	CEP84_RS18445	CEG92_RS08165	EC391_RS03465	EC390_RS19260	EGM63_RS21620	EGM64_RS11035	EGM60_RS07925	EGA31_RS09525
1542	13	short-chain dehydrogenase	GCF_000007865	MAP_RS07960	0		MAP_RS07960	MAP4_RS11340	RC58_RS11320	RE97_RS11330	A0V42_RS07980	CEP84_RS18435	CEG92_RS08175	EC391_RS03455	EC390_RS19270	EGM63_RS21610	EGM64_RS11045	EGM60_RS07935	EGA31_RS09535
1543	13	molybdate ABC transporter substrate-binding protein	GCF_000007865	MAP_RS07965	0		MAP_RS07965	MAP4_RS11335	RC58_RS11315	RE97_RS11325	A0V42_RS07985	CEP84_RS18430	CEG92_RS08180	EC391_RS03450	EC390_RS19275	EGM63_RS21605	EGM64_RS11050	EGM60_RS07940	EGA31_RS09540
1544	13	DUF2236 domain-containing protein	GCF_000007865	MAP_RS07970	0		MAP_RS07970	MAP4_RS11330	RC58_RS11310	RE97_RS11320	A0V42_RS07990	CEP84_RS18425	CEG92_RS08185	EC391_RS03445	EC390_RS19280	EGM63_RS21600	EGM64_RS11055	EGM60_RS07945	EGA31_RS09545
1545	13	molybdate ABC transporter permease subunit	GCF_000007865	MAP_RS07975	0		MAP_RS07975	MAP4_RS11325	RC58_RS11305	RE97_RS11315	A0V42_RS07995	CEP84_RS18420	CEG92_RS08190	EC391_RS03440	EC390_RS19285	EGM63_RS21595	EGM64_RS11060	EGM60_RS07950	EGA31_RS09550
1547	13	hypothetical protein	GCF_000007865	MAP_RS07985	0		MAP_RS07985	MAP4_RS11315	RC58_RS11295	RE97_RS11305	A0V42_RS08005	CEP84_RS18410	CEG92_RS08200	EC391_RS03430	EC390_RS19295	EGM63_RS21585	EGM64_RS11070	EGM60_RS07960	EGA31_RS09560
1548	13	GlsB/YeaQ/YmgE family stress response membrane protein	GCF_000007865	MAP_RS07990	0		MAP_RS07990	MAP4_RS11310	RC58_RS11290	RE97_RS11300	A0V42_RS08010	CEP84_RS18405	CEG92_RS08205	EC391_RS03425	EC390_RS19300	EGM63_RS21580	EGM64_RS11075	EGM60_RS07965	EGA31_RS12360
1549	13	zinc-binding alcohol dehydrogenase family protein	GCF_000007865	MAP_RS07995	0		MAP_RS07995	MAP4_RS11305	RC58_RS11285	RE97_RS11295	A0V42_RS08015	CEP84_RS18400	CEG92_RS08210	EC391_RS03420	EC390_RS19305	EGM63_RS21575	EGM64_RS11080	EGM60_RS07970	EGA31_RS12355
1551	13	phosphoketolase	GCF_000007865	MAP_RS08005	0		MAP_RS08005	MAP4_RS11295	RC58_RS11275	RE97_RS11285	A0V42_RS08025	CEP84_RS18390	CEG92_RS08220	EC391_RS03410	EC390_RS19315	EGM63_RS21565	EGM64_RS11090	EGM60_RS07980	EGA31_RS12345
1552	13	NAD(P)-dependent oxidoreductase	GCF_000007865	MAP_RS08010	0		MAP_RS08010	MAP4_RS11290	RC58_RS11270	RE97_RS11280	A0V42_RS08030	CEP84_RS18385	CEG92_RS08225	EC391_RS03405	EC390_RS19320	EGM63_RS21560	EGM64_RS11095	EGM60_RS07985	EGA31_RS12340
1553	13	undecaprenyl-diphosphatase	GCF_000007865	MAP_RS08015	0		MAP_RS08015	MAP4_RS11285	RC58_RS11265	RE97_RS11275	A0V42_RS08035	CEP84_RS18380	CEG92_RS08230	EC391_RS03400	EC390_RS19325	EGM63_RS21555	EGM64_RS11100	EGM60_RS07990	EGA31_RS12335
1554	13	CoA transferase	GCF_000007865	MAP_RS08020	0		MAP_RS08020	MAP4_RS11280	RC58_RS11260	RE97_RS11270	A0V42_RS08040	CEP84_RS18375	CEG92_RS08235	EC391_RS03395	EC390_RS19330	EGM63_RS21550	EGM64_RS11105	EGM60_RS07995	EGA31_RS12330
1555	13	acetyl-CoA acetyltransferase	GCF_000007865	MAP_RS08025	0		MAP_RS08025	MAP4_RS11275	RC58_RS11255	RE97_RS11265	A0V42_RS08045	CEP84_RS18370	CEG92_RS08240	EC391_RS03390	EC390_RS19335	EGM63_RS21545	EGM64_RS11110	EGM60_RS08000	EGA31_RS12325
1557	13	pyridine nucleotide-disulfide oxidoreductase	GCF_000007865	MAP_RS08035	0		MAP_RS08035	MAP4_RS11265	RC58_RS11245	RE97_RS11255	A0V42_RS08055	CEP84_RS18360	CEG92_RS08250	EC391_RS03380	EC390_RS19345	EGM63_RS21535	EGM64_RS11120	EGM60_RS08010	EGA31_RS12315
1558	13	DUF72 domain-containing protein	GCF_000007865	MAP_RS08040	0		MAP_RS08040	MAP4_RS11260	RC58_RS11240	RE97_RS11250	A0V42_RS08060	CEP84_RS18355	CEG92_RS08255	EC391_RS03375	EC390_RS19350	EGM63_RS21530	EGM64_RS11125	EGM60_RS08015	EGA31_RS12310
1559	13	endonuclease	GCF_000007865	MAP_RS08045	0		MAP_RS08045	MAP4_RS11255	RC58_RS11235	RE97_RS11245	A0V42_RS08065	CEP84_RS18350	CEG92_RS08260	EC391_RS03370	EC390_RS19355	EGM63_RS21525	EGM64_RS11130	EGM60_RS08020	EGA31_RS12305
1560	13	RNA methyltransferase	GCF_000007865	MAP_RS08050	0		MAP_RS08050	MAP4_RS11250	RC58_RS11230	RE97_RS11240	A0V42_RS08070	CEP84_RS18345	CEG92_RS08265	EC391_RS03365	EC390_RS19360	EGM63_RS21520	EGM64_RS11135	EGM60_RS08025	EGA31_RS12300
1561	13	nitroreductase family deazaflavin-dependent oxidoreductase	GCF_000007865	MAP_RS08055	0		MAP_RS08055	MAP4_RS11245	RC58_RS11225	RE97_RS11235	A0V42_RS08075	CEP84_RS18340	CEG92_RS08270	EC391_RS03360	EC390_RS19365	EGM63_RS21515	EGM64_RS11140	EGM60_RS08030	EGA31_RS12295
1562	13	endopeptidase La	GCF_000007865	MAP_RS08060	0		MAP_RS08060	MAP4_RS11240	RC58_RS11220	RE97_RS11230	A0V42_RS08080	CEP84_RS18335	CEG92_RS08275	EC391_RS03355	EC390_RS19370	EGM63_RS21510	EGM64_RS11145	EGM60_RS08035	EGA31_RS12290
1563	13	alpha-hydroxy-acid oxidizing protein	GCF_000007865	MAP_RS08065	0		MAP_RS08065	MAP4_RS11235	RC58_RS11215	RE97_RS11225	A0V42_RS08085	CEP84_RS18330	CEG92_RS08280	EC391_RS03350	EC390_RS19375	EGM63_RS21505	EGM64_RS11150	EGM60_RS08040	EGA31_RS12285
1564	13	DUF1810 domain-containing protein	GCF_000007865	MAP_RS08070	0		MAP_RS08070	MAP4_RS11230	RC58_RS11210	RE97_RS11220	A0V42_RS08090	CEP84_RS18325	CEG92_RS08285	EC391_RS03345	EC390_RS19380	EGM63_RS21500	EGM64_RS11155	EGM60_RS08045	EGA31_RS12280
1566	13	alkyl hydroperoxide reductase AhpD	GCF_000007865	MAP_RS08080	0		MAP_RS08080	MAP4_RS11220	RC58_RS11200	RE97_RS11210	A0V42_RS08100	CEP84_RS18315	CEG92_RS08295	EC391_RS03335	EC390_RS19390	EGM63_RS21490	EGM64_RS11165	EGM60_RS08055	EGA31_RS12270
1567	13	peroxiredoxin	GCF_000007865	MAP_RS08085	0		MAP_RS08085	MAP4_RS11215	RC58_RS11195	RE97_RS11205	A0V42_RS08105	CEP84_RS18310	CEG92_RS08300	EC391_RS03330	EC390_RS19395	EGM63_RS21485	EGM64_RS11170	EGM60_RS08060	EGA31_RS12265
1568	13	hydrogen peroxide-inducible genes activator	GCF_000007865	MAP_RS08090	0		MAP_RS08090	MAP4_RS11210	RC58_RS11190	RE97_RS11200	A0V42_RS08110	CEP84_RS18305	CEG92_RS08305	EC391_RS03325	EC390_RS19400	EGM63_RS21480	EGM64_RS11175	EGM60_RS08065	EGA31_RS12260
1569	13	hypothetical protein	GCF_000007865	MAP_RS08095	0		MAP_RS08095	MAP4_RS11205	RC58_RS11185	RE97_RS11195	A0V42_RS08115	CEP84_RS18300	CEG92_RS08310	EC391_RS03320	EC390_RS19405	EGM63_RS21475	EGM64_RS11180	EGM60_RS08070	EGA31_RS12255
1570	13	TIGR03618 family F420-dependent PPOX class oxidoreductase	GCF_000007865	MAP_RS08100	0		MAP_RS08100	MAP4_RS11200	RC58_RS11180	RE97_RS11190	A0V42_RS08120	CEP84_RS18295	CEG92_RS08315	EC391_RS03315	EC390_RS19410	EGM63_RS21470	EGM64_RS11185	EGM60_RS08075	EGA31_RS12250
1571	13	crotonase	GCF_000007865	MAP_RS08105	0		MAP_RS08105	MAP4_RS11195	RC58_RS11175	RE97_RS11185	A0V42_RS08125	CEP84_RS18290	CEG92_RS08320	EC391_RS03310	EC390_RS19415	EGM63_RS21465	EGM64_RS11190	EGM60_RS08080	EGA31_RS12245
1572	13	(2Fe-2S)-binding protein	GCF_000007865	MAP_RS08110	0		MAP_RS08110	MAP4_RS11190	RC58_RS11170	RE97_RS11180	A0V42_RS08130	CEP84_RS18285	CEG92_RS08325	EC391_RS03305	EC390_RS19420	EGM63_RS21460	EGM64_RS11195	EGM60_RS08085	EGA31_RS12240
1573	13	bacterioferritin	GCF_000007865	MAP_RS08115	0		MAP_RS08115	MAP4_RS11185	RC58_RS11165	RE97_RS11175	A0V42_RS08135	CEP84_RS18280	CEG92_RS08330	EC391_RS03300	EC390_RS19425	EGM63_RS21455	EGM64_RS11200	EGM60_RS08090	EGA31_RS12235
1574	13	MFS transporter	GCF_000007865	MAP_RS08120	0		MAP_RS08120	MAP4_RS11180	RC58_RS11160	RE97_RS11170	A0V42_RS08140	CEP84_RS18275	CEG92_RS08335	EC391_RS03295	EC390_RS19430	EGM63_RS21450	EGM64_RS11205	EGM60_RS08095	EGA31_RS12230
1575	13	carboxymuconolactone decarboxylase family protein	GCF_000007865	MAP_RS08125	0		MAP_RS08125	MAP4_RS11175	RC58_RS11155	RE97_RS11165	A0V42_RS08145	CEP84_RS18270	CEG92_RS08340	EC391_RS03290	EC390_RS19435	EGM63_RS21445	EGM64_RS11210	EGM60_RS08100	EGA31_RS12225
1576	13	TIGR03854 family LLM class F420-dependent oxidoreductase	GCF_000007865	MAP_RS08130	0		MAP_RS08130	MAP4_RS11170	RC58_RS11150	RE97_RS11160	A0V42_RS08150	CEP84_RS18265	CEG92_RS08345	EC391_RS03285	EC390_RS19440	EGM63_RS21440	EGM64_RS11215	EGM60_RS08105	EGA31_RS12220
1577	13	glutamine synthetase	GCF_000007865	MAP_RS08135	0		MAP_RS08135	MAP4_RS11165	RC58_RS11145	RE97_RS11155	A0V42_RS08155	CEP84_RS18260	CEG92_RS08350	EC391_RS03280	EC390_RS19445	EGM63_RS21435	EGM64_RS11220	EGM60_RS08110	EGA31_RS12215
1578	13	amidohydrolase	GCF_000007865	MAP_RS08140	0		MAP_RS08140	MAP4_RS11160	RC58_RS11140	RE97_RS11150	A0V42_RS08160	CEP84_RS18255	CEG92_RS08355	EC391_RS03275	EC390_RS19450	EGM63_RS21430	EGM64_RS11225	EGM60_RS08115	EGA31_RS12210
1579	13	hypothetical protein	GCF_000007865	MAP_RS08145	0		MAP_RS08145	MAP4_RS11155	RC58_RS11135	RE97_RS11145	A0V42_RS08165	CEP84_RS18250	CEG92_RS08360	EC391_RS03270	EC390_RS19455	EGM63_RS21425	EGM64_RS11230	EGM60_RS08120	EGA31_RS12205
1580	13	limonene-1,2-epoxide hydrolase	GCF_000007865	MAP_RS08150	0		MAP_RS08150	MAP4_RS11150	RC58_RS11130	RE97_RS11140	A0V42_RS08170	CEP84_RS18245	CEG92_RS08365	EC391_RS03265	EC390_RS19460	EGM63_RS21420	EGM64_RS11235	EGM60_RS08125	EGA31_RS12200
1581	13	cytochrome P450	GCF_000007865	MAP_RS08155	0		MAP_RS08155	MAP4_RS11145	RC58_RS11125	RE97_RS11135	A0V42_RS08175	CEP84_RS18240	CEG92_RS08370	EC391_RS03260	EC390_RS19465	EGM63_RS21415	EGM64_RS11240	EGM60_RS08130	EGA31_RS12195
1582	13	hypothetical protein	GCF_000007865	MAP_RS08160	0		MAP_RS08160	MAP4_RS11140	RC58_RS11120	RE97_RS11130	A0V42_RS08180	CEP84_RS18235	CEG92_RS08375	EC391_RS03255	EC390_RS19470	EGM63_RS21410	EGM64_RS11245	EGM60_RS08135	EGA31_RS12190
1583	13	short-chain dehydrogenase	GCF_000007865	MAP_RS08165	0		MAP_RS08165	MAP4_RS11135	RC58_RS11115	RE97_RS11125	A0V42_RS08185	CEP84_RS18230	CEG92_RS08380	EC391_RS03250	EC390_RS19475	EGM63_RS21405	EGM64_RS11250	EGM60_RS08140	EGA31_RS12185
1584	13	SRPBCC family protein	GCF_000007865	MAP_RS08170	0		MAP_RS08170	MAP4_RS11130	RC58_RS11110	RE97_RS11120	A0V42_RS08190	CEP84_RS18225	CEG92_RS08385	EC391_RS03245	EC390_RS19480	EGM63_RS21400	EGM64_RS11255	EGM60_RS08145	EGA31_RS12180
1585	13	Resuscitation-promoting factor RpfC	GCF_000007865	MAP_RS08175	0		MAP_RS08175	MAP4_RS11125	RC58_RS11105	RE97_RS11115	A0V42_RS08195	CEP84_RS18220	CEG92_RS08390	EC391_RS03240	EC390_RS19485	EGM63_RS21395	EGM64_RS11260	EGM60_RS08150	EGA31_RS12175
1586	13	gamma subclass chorismate mutase AroQ	GCF_000007865	MAP_RS08180	0		MAP_RS08180	MAP4_RS11120	RC58_RS11100	RE97_RS11110	A0V42_RS08200	CEP84_RS18215	CEG92_RS08395	EC391_RS03235	EC390_RS19490	EGM63_RS21390	EGM64_RS11265	EGM60_RS08155	EGA31_RS12170
1587	13	esterase family protein	GCF_000390085	MAP4_RS11115	0		MAP_RS08185	MAP4_RS11115	RC58_RS11095	RE97_RS11105	A0V42_RS08205	CEP84_RS18210	CEG92_RS08400	EC391_RS03230	EC390_RS19495	EGM63_RS21385	EGM64_RS11270	EGM60_RS08160	EGA31_RS12165
1588	13	hypothetical protein	GCF_000007865	MAP_RS22625	0		MAP_RS22625	MAP4_RS22755	RC58_RS22735	RE97_RS22815	A0V42_RS22565	CEP84_RS18205	CEG92_RS08405	EC391_RS03225	EC390_RS19500	EGM63_RS21380	EGM64_RS11275	EGM60_RS08165	EGA31_RS12160
1589	13	hypothetical protein	GCF_000007865	MAP_RS08190	0		MAP_RS08190	MAP4_RS11110	RC58_RS11090	RE97_RS11100	A0V42_RS08210	CEP84_RS18200	CEG92_RS08410	EC391_RS03220	EC390_RS19505	EGM63_RS21375	EGM64_RS11280	EGM60_RS08170	EGA31_RS12155
1590	13	YceI family protein	GCF_000007865	MAP_RS08195	0		MAP_RS08195	MAP4_RS11105	RC58_RS11085	RE97_RS11095	A0V42_RS08215	CEP84_RS18195	CEG92_RS08415	EC391_RS03215	EC390_RS19510	EGM63_RS21370	EGM64_RS11285	EGM60_RS08175	EGA31_RS12150
1591	13	Zn-dependent alcohol dehydrogenase	GCF_000007865	MAP_RS08200	0		MAP_RS08200	MAP4_RS11100	RC58_RS11080	RE97_RS11090	A0V42_RS08220	CEP84_RS18190	CEG92_RS08420	EC391_RS03210	EC390_RS19515	EGM63_RS21365	EGM64_RS11290	EGM60_RS08180	EGA31_RS12145
1592	13	cytochrome P450	GCF_000007865	MAP_RS08205	0		MAP_RS08205	MAP4_RS11095	RC58_RS11075	RE97_RS11085	A0V42_RS08225	CEP84_RS18185	CEG92_RS08425	EC391_RS03205	EC390_RS19520	EGM63_RS21360	EGM64_RS11295	EGM60_RS08185	EGA31_RS12140
1593	13	hypothetical protein	GCF_000007865	MAP_RS08210	0		MAP_RS08210	MAP4_RS11090	RC58_RS11070	RE97_RS11080	A0V42_RS08230	CEP84_RS18180	CEG92_RS08430	EC391_RS03200	EC390_RS19525	EGM63_RS21355	EGM64_RS11300	EGM60_RS08190	EGA31_RS12135
1594	13	hypothetical protein	GCF_000007865	MAP_RS08215	0		MAP_RS08215	MAP4_RS11085	RC58_RS11065	RE97_RS11075	A0V42_RS08235	CEP84_RS18175	CEG92_RS08435	EC391_RS03195	EC390_RS19530	EGM63_RS21350	EGM64_RS11305	EGM60_RS08195	EGA31_RS12130
1595	13	hypothetical protein	GCF_000007865	MAP_RS08220	0		MAP_RS08220	MAP4_RS11080	RC58_RS11060	RE97_RS11070	A0V42_RS08240	CEP84_RS18170	CEG92_RS08440	EC391_RS03190	EC390_RS19535	EGM63_RS21345	EGM64_RS11310	EGM60_RS08200	EGA31_RS12125
1596	13	nitronate monooxygenase	GCF_000007865	MAP_RS08225	0		MAP_RS08225	MAP4_RS11075	RC58_RS11055	RE97_RS11065	A0V42_RS08245	CEP84_RS18165	CEG92_RS08445	EC391_RS03185	EC390_RS19540	EGM63_RS21340	EGM64_RS11315	EGM60_RS08205	EGA31_RS12120
1597	13	HNH endonuclease	GCF_000007865	MAP_RS08230	0		MAP_RS08230	MAP4_RS11070	RC58_RS11050	RE97_RS11060	A0V42_RS08250	CEP84_RS18160	CEG92_RS08450	EC391_RS03180	EC390_RS19545	EGM63_RS21335	EGM64_RS11320	EGM60_RS08210	EGA31_RS12115
1598	13	dehydrogenase	GCF_000007865	MAP_RS08240	0	FS	MAP_RS08240	MAP4_RS11060	RC58_RS11040	RE97_RS11050	A0V42_RS08260	CEP84_RS18150	CEG92_RS08460	EC391_RS03165	EC390_RS19555	EGM63_RS21325	EGM64_RS11330	EGM60_RS08220	EGA31_RS12105
1599	13	SAM-dependent methyltransferase	GCF_000007865	MAP_RS08245	0		MAP_RS08245	MAP4_RS11055	RC58_RS11035	RE97_RS11045	A0V42_RS08265	CEP84_RS18145	CEG92_RS08465	EC391_RS03160	EC390_RS19560	EGM63_RS21320	EGM64_RS11335	EGM60_RS08225	EGA31_RS12100
1600	13	D-tyrosyl-tRNA(Tyr) deacylase	GCF_000007865	MAP_RS08250	0		MAP_RS08250	MAP4_RS11050	RC58_RS11030	RE97_RS11040	A0V42_RS08270	CEP84_RS18140	CEG92_RS08470	EC391_RS03155	EC390_RS19565	EGM63_RS21315	EGM64_RS11340	EGM60_RS08230	EGA31_RS12095
1601	13	thiamine-binding protein	GCF_000007865	MAP_RS08255	0		MAP_RS08255	MAP4_RS11045	RC58_RS11025	RE97_RS11035	A0V42_RS08275	CEP84_RS18135	CEG92_RS08475	EC391_RS03150	EC390_RS19570	EGM63_RS21310	EGM64_RS11345	EGM60_RS08235	EGA31_RS12090
1602	13	cinA-like protein	GCF_000007865	MAP_RS08260	0		MAP_RS08260	MAP4_RS11040	RC58_RS11020	RE97_RS11030	A0V42_RS08280	CEP84_RS18130	CEG92_RS08480	EC391_RS03145	EC390_RS19575	EGM63_RS21305	EGM64_RS11350	EGM60_RS08240	EGA31_RS12085
1603	13	MFS transporter	GCF_000007865	MAP_RS08265	0		MAP_RS08265	MAP4_RS11035	RC58_RS11015	RE97_RS11025	A0V42_RS08285	CEP84_RS18125	CEG92_RS08485	EC391_RS03140	EC390_RS19580	EGM63_RS21300	EGM64_RS11355	EGM60_RS08245	EGA31_RS12080
1604	13	amidohydrolase	GCF_000007865	MAP_RS08270	0		MAP_RS08270	MAP4_RS11030	RC58_RS11010	RE97_RS11020	A0V42_RS08290	CEP84_RS18120	CEG92_RS08490	EC391_RS03135	EC390_RS19585	EGM63_RS21295	EGM64_RS11360	EGM60_RS08250	EGA31_RS12075
1605	13	phage holin family protein	GCF_000007865	MAP_RS08275	0		MAP_RS08275	MAP4_RS11025	RC58_RS11005	RE97_RS11015	A0V42_RS08295	CEP84_RS18115	CEG92_RS08495	EC391_RS03130	EC390_RS19590	EGM63_RS21290	EGM64_RS11365	EGM60_RS08255	EGA31_RS12070
1606	13	FAD-binding oxidoreductase	GCF_000007865	MAP_RS08280	0		MAP_RS08280	MAP4_RS11020	RC58_RS11000	RE97_RS11010	A0V42_RS08300	CEP84_RS18110	CEG92_RS08500	EC391_RS03125	EC390_RS19595	EGM63_RS21285	EGM64_RS11370	EGM60_RS08260	EGA31_RS12065
1607	13	hypothetical protein	GCF_000007865	MAP_RS22630	0		MAP_RS22630	MAP4_RS22750	RC58_RS22730	RE97_RS22810	A0V42_RS22570	CEP84_RS18105	CEG92_RS08505	EC391_RS03120	EC390_RS19600	EGM63_RS21280	EGM64_RS11375	EGM60_RS08265	EGA31_RS12060
1608	13	TetR/AcrR family transcriptional regulator	GCF_000007865	MAP_RS22640	0		MAP_RS22640	MAP4_RS22740	RC58_RS22720	RE97_RS22800	A0V42_RS22580	CEP84_RS18095	CEG92_RS08515	EC391_RS03110	EC390_RS19610	EGM63_RS21270	EGM64_RS11385	EGM60_RS08275	EGA31_RS12050
1609	13	MFS transporter	GCF_000007865	MAP_RS08295	0		MAP_RS08295	MAP4_RS11005	RC58_RS10985	RE97_RS10995	A0V42_RS08320	CEP84_RS18090	CEG92_RS08520	EC391_RS03105	EC390_RS19615	EGM63_RS21265	EGM64_RS11390	EGM60_RS08280	EGA31_RS12045
1610	13	DoxX family protein	GCF_000007865	MAP_RS08300	0		MAP_RS08300	MAP4_RS11000	RC58_RS10980	RE97_RS10990	A0V42_RS08325	CEP84_RS18080	CEG92_RS08525	EC391_RS03095	EC390_RS19625	EGM63_RS21255	EGM64_RS11400	EGM60_RS08290	EGA31_RS12035
1611	13	hypothetical protein	GCF_000007865	MAP_RS08305	0		MAP_RS08305	MAP4_RS10995	RC58_RS10975	RE97_RS10985	A0V42_RS08330	CEP84_RS18075	CEG92_RS08530	EC391_RS03090	EC390_RS19630	EGM63_RS21250	EGM64_RS11405	EGM60_RS08295	EGA31_RS12030
1612	13	transcriptional regulator	GCF_000007865	MAP_RS22645	0		MAP_RS22645	MAP4_RS22735	RC58_RS22715	RE97_RS22795	A0V42_RS22585	CEP84_RS18070	CEG92_RS08535	EC391_RS03085	EC390_RS19635	EGM63_RS21245	EGM64_RS11410	EGM60_RS08300	EGA31_RS12025
1613	13	UbiX family flavin prenyltransferase	GCF_000007865	MAP_RS08310	0		MAP_RS08310	MAP4_RS10990	RC58_RS10970	RE97_RS10980	A0V42_RS08335	CEP84_RS18065	CEG92_RS08540	EC391_RS03080	EC390_RS19640	EGM63_RS21240	EGM64_RS11415	EGM60_RS08305	EGA31_RS12020
1614	13	hypothetical protein	GCF_000007865	MAP_RS08315	0		MAP_RS08315	MAP4_RS10985	RC58_RS10965	RE97_RS10975	A0V42_RS08340	CEP84_RS18060	CEG92_RS08545	EC391_RS03075	EC390_RS19645	EGM63_RS21235	EGM64_RS11420	EGM60_RS08310	EGA31_RS12015
1615	13	UbiD family decarboxylase	GCF_000007865	MAP_RS08320	0		MAP_RS08320	MAP4_RS10980	RC58_RS10960	RE97_RS10970	A0V42_RS08345	CEP84_RS18055	CEG92_RS08550	EC391_RS03070	EC390_RS19650	EGM63_RS21230	EGM64_RS11425	EGM60_RS08315	EGA31_RS12010
1617	13	cyclase	GCF_000007865	MAP_RS08330	0		MAP_RS08330	MAP4_RS10970	RC58_RS10950	RE97_RS10960	A0V42_RS08355	CEP84_RS18045	CEG92_RS08560	EC391_RS03060	EC390_RS19660	EGM63_RS21220	EGM64_RS11435	EGM60_RS08325	EGA31_RS12000
1618	13	SRPBCC domain-containing protein	GCF_000007865	MAP_RS08335	0		MAP_RS08335	MAP4_RS10965	RC58_RS10945	RE97_RS10955	A0V42_RS08360	CEP84_RS18040	CEG92_RS08565	EC391_RS03055	EC390_RS19665	EGM63_RS21215	EGM64_RS11440	EGM60_RS08330	EGA31_RS11995
1619	13	ArsR family transcriptional regulator	GCF_000007865	MAP_RS08340	0		MAP_RS08340	MAP4_RS10960	RC58_RS10940	RE97_RS10950	A0V42_RS08365	CEP84_RS18035	CEG92_RS08570	EC391_RS03050	EC390_RS19670	EGM63_RS21210	EGM64_RS11445	EGM60_RS08335	EGA31_RS11990
1620	13	MBL fold hydrolase	GCF_000007865	MAP_RS08345	0		MAP_RS08345	MAP4_RS10955	RC58_RS10935	RE97_RS10945	A0V42_RS08370	CEP84_RS18030	CEG92_RS08575	EC391_RS03045	EC390_RS19675	EGM63_RS21205	EGM64_RS11450	EGM60_RS08340	EGA31_RS11985
1621	13	isocitrate lyase	GCF_000007865	MAP_RS08350	0		MAP_RS08350	MAP4_RS10950	RC58_RS10930	RE97_RS10940	A0V42_RS08375	CEP84_RS18025	CEG92_RS08580	EC391_RS03040	EC390_RS19680	EGM63_RS21200	EGM64_RS11455	EGM60_RS08345	EGA31_RS11980
1622	13	LLM class flavin-dependent oxidoreductase	GCF_000007865	MAP_RS08360	0		MAP_RS08360	MAP4_RS10940	RC58_RS10920	RE97_RS10930	A0V42_RS08385	CEP84_RS18015	CEG92_RS08590	EC391_RS03030	EC390_RS19690	EGM63_RS21190	EGM64_RS11465	EGM60_RS08355	EGA31_RS11970
1623	13	SRPBCC family protein	GCF_000007865	MAP_RS08365	0		MAP_RS08365	MAP4_RS10935	RC58_RS10915	RE97_RS10925	A0V42_RS08390	CEP84_RS18010	CEG92_RS08595	EC391_RS03025	EC390_RS19695	EGM63_RS21185	EGM64_RS11470	EGM60_RS08360	EGA31_RS11965
1624	13	nitrate ABC transporter substrate-binding protein	GCF_000007865	MAP_RS08370	0		MAP_RS08370	MAP4_RS10930	RC58_RS10910	RE97_RS10920	A0V42_RS08395	CEP84_RS18005	CEG92_RS08600	EC391_RS03020	EC390_RS19700	EGM63_RS21180	EGM64_RS11475	EGM60_RS08365	EGA31_RS11960
1625	13	hypothetical protein	GCF_000007865	MAP_RS08375	0		MAP_RS08375	MAP4_RS10925	RC58_RS10905	RE97_RS10915	A0V42_RS08400	CEP84_RS18000	CEG92_RS08605	EC391_RS03015	EC390_RS19705	EGM63_RS21175	EGM64_RS11480	EGM60_RS08370	EGA31_RS11955
1626	13	3-oxoacyl-ACP reductase	GCF_000007865	MAP_RS08380	0		MAP_RS08380	MAP4_RS10920	RC58_RS10900	RE97_RS10910	A0V42_RS08405	CEP84_RS17995	CEG92_RS08610	EC391_RS03010	EC390_RS19710	EGM63_RS21170	EGM64_RS11485	EGM60_RS08375	EGA31_RS11950
1627	13	nuclear transport factor 2 family protein	GCF_000007865	MAP_RS08385	0		MAP_RS08385	MAP4_RS10915	RC58_RS10895	RE97_RS10905	A0V42_RS08410	CEP84_RS17990	CEG92_RS08615	EC391_RS03005	EC390_RS19715	EGM63_RS21165	EGM64_RS11490	EGM60_RS08380	EGA31_RS11945
1628	13	DJ-1/PfpI family protein	GCF_000007865	MAP_RS08390	0		MAP_RS08390	MAP4_RS10910	RC58_RS10890	RE97_RS10900	A0V42_RS08415	CEP84_RS17985	CEG92_RS08620	EC391_RS03000	EC390_RS19720	EGM63_RS21160	EGM64_RS11495	EGM60_RS08385	EGA31_RS11940
1629	13	GlxA family transcriptional regulator	GCF_000007865	MAP_RS08395	0		MAP_RS08395	MAP4_RS10905	RC58_RS10885	RE97_RS10895	A0V42_RS08420	CEP84_RS17980	CEG92_RS08625	EC391_RS02995	EC390_RS19725	EGM63_RS21155	EGM64_RS11500	EGM60_RS08390	EGA31_RS11935
1630	13	thiol peroxidase	GCF_000007865	MAP_RS08400	0		MAP_RS08400	MAP4_RS10900	RC58_RS10880	RE97_RS10890	A0V42_RS08425	CEP84_RS17975	CEG92_RS08630	EC391_RS02990	EC390_RS19730	EGM63_RS21150	EGM64_RS11505	EGM60_RS08395	EGA31_RS11930
1631	13	nitronate monooxygenase	GCF_000007865	MAP_RS08405	0		MAP_RS08405	MAP4_RS10895	RC58_RS10875	RE97_RS10885	A0V42_RS08430	CEP84_RS17970	CEG92_RS08635	EC391_RS02985	EC390_RS19735	EGM63_RS21145	EGM64_RS11510	EGM60_RS08400	EGA31_RS11925
1632	13	RNA-binding protein	GCF_000007865	MAP_RS08410	0		MAP_RS08410	MAP4_RS10890	RC58_RS10870	RE97_RS10880	A0V42_RS08435	CEP84_RS17965	CEG92_RS08640	EC391_RS02980	EC390_RS19740	EGM63_RS21140	EGM64_RS11515	EGM60_RS08405	EGA31_RS11920
1633	13	acyl-CoA dehydrogenase	GCF_000007865	MAP_RS08415	0		MAP_RS08415	MAP4_RS10885	RC58_RS10865	RE97_RS10875	A0V42_RS08440	CEP84_RS17960	CEG92_RS08645	EC391_RS02975	EC390_RS19745	EGM63_RS21135	EGM64_RS11520	EGM60_RS08410	EGA31_RS11915
1634	13	oxidoreductase	GCF_000007865	MAP_RS08420	0		MAP_RS08420	MAP4_RS10880	RC58_RS10860	RE97_RS10870	A0V42_RS08445	CEP84_RS17955	CEG92_RS08650	EC391_RS02970	EC390_RS19750	EGM63_RS21130	EGM64_RS11525	EGM60_RS08415	EGA31_RS11910
1636	13	hypothetical protein	GCF_000007865	MAP_RS08430	0		MAP_RS08430	MAP4_RS10870	RC58_RS10850	RE97_RS10860	A0V42_RS08455	CEP84_RS17945	CEG92_RS08660	EC391_RS02960	EC390_RS19760	EGM63_RS21120	EGM64_RS11535	EGM60_RS08425	EGA31_RS11900
1637	13	hypothetical protein	GCF_000007865	MAP_RS08435	0		MAP_RS08435	MAP4_RS10865	RC58_RS10845	RE97_RS10855	A0V42_RS08460	CEP84_RS17940	CEG92_RS08665	EC391_RS02955	EC390_RS19765	EGM63_RS21115	EGM64_RS11540	EGM60_RS08430	EGA31_RS11895
1638	13	SAM-dependent methyltransferase	GCF_000007865	MAP_RS08440	0		MAP_RS08440	MAP4_RS10860	RC58_RS10840	RE97_RS10850	A0V42_RS08465	CEP84_RS17935	CEG92_RS08670	EC391_RS02950	EC390_RS19770	EGM63_RS21110	EGM64_RS11545	EGM60_RS08435	EGA31_RS11890
1639	13	glycoside hydrolase family 16 protein	GCF_000007865	MAP_RS08445	0		MAP_RS08445	MAP4_RS10855	RC58_RS10835	RE97_RS10845	A0V42_RS08470	CEP84_RS17930	CEG92_RS08675	EC391_RS02945	EC390_RS19775	EGM63_RS21105	EGM64_RS11550	EGM60_RS08440	EGA31_RS11885
1640	13	hypothetical protein	GCF_000007865	MAP_RS22655	0		MAP_RS22655	MAP4_RS22725	RC58_RS22710	RE97_RS22790	A0V42_RS22595	CEP84_RS17925	CEG92_RS08680	EC391_RS02940	EC390_RS19780	EGM63_RS21100	EGM64_RS11555	EGM60_RS08445	EGA31_RS11880
1641	13	cutinase family protein	GCF_000007865	MAP_RS08450	0		MAP_RS08450	MAP4_RS10850	RC58_RS10830	RE97_RS10840	A0V42_RS08475	CEP84_RS17920	CEG92_RS08685	EC391_RS02935	EC390_RS19785	EGM63_RS21095	EGM64_RS11560	EGM60_RS08450	EGA31_RS11875
1642	13	class I SAM-dependent methyltransferase	GCF_000007865	MAP_RS08455	0		MAP_RS08455	MAP4_RS10845	RC58_RS10825	RE97_RS10835	A0V42_RS08480	CEP84_RS17915	CEG92_RS08690	EC391_RS02930	EC390_RS19790	EGM63_RS21090	EGM64_RS11565	EGM60_RS08455	EGA31_RS11870
1643	13	hypothetical protein	GCF_000007865	MAP_RS08460	0		MAP_RS08460	MAP4_RS10840	RC58_RS10820	RE97_RS10830	A0V42_RS08485	CEP84_RS17910	CEG92_RS08695	EC391_RS02925	EC390_RS19795	EGM63_RS21085	EGM64_RS11570	EGM60_RS08460	EGA31_RS11865
1644	13	class I SAM-dependent methyltransferase	GCF_000007865	MAP_RS08465	0		MAP_RS08465	MAP4_RS10835	RC58_RS10815	RE97_RS10825	A0V42_RS08490	CEP84_RS17905	CEG92_RS08700	EC391_RS02920	EC390_RS19800	EGM63_RS21080	EGM64_RS11575	EGM60_RS08465	EGA31_RS11860
1645	13	glycosyltransferase family 1 protein	GCF_000007865	MAP_RS08470	0		MAP_RS08470	MAP4_RS10830	RC58_RS10810	RE97_RS10820	A0V42_RS08495	CEP84_RS17900	CEG92_RS08705	EC391_RS02915	EC390_RS19805	EGM63_RS21075	EGM64_RS11580	EGM60_RS08470	EGA31_RS11855
1646	13	DUF1906 domain-containing protein	GCF_000007865	MAP_RS08475	0		MAP_RS08475	MAP4_RS10825	RC58_RS10805	RE97_RS10815	A0V42_RS08500	CEP84_RS17895	CEG92_RS08710	EC391_RS02910	EC390_RS19810	EGM63_RS21070	EGM64_RS11585	EGM60_RS08475	EGA31_RS11850
1647	13	catalase peroxidase	GCF_000007865	MAP_RS08480	0		MAP_RS08480	MAP4_RS10820	RC58_RS10800	RE97_RS10810	A0V42_RS08505	CEP84_RS17890	CEG92_RS08715	EC391_RS02905	EC390_RS19815	EGM63_RS21065	EGM64_RS11590	EGM60_RS08480	EGA31_RS11845
1648	13	transcriptional repressor	GCF_000835225	RC58_RS10795	0		MAP_RS08485	MAP4_RS10815	RC58_RS10795	RE97_RS10805	A0V42_RS08510	CEP84_RS17885	CEG92_RS08720	EC391_RS02900	EC390_RS19820	EGM63_RS21060	EGM64_RS11595	EGM60_RS08485	EGA31_RS11840
1649	13	hypothetical protein	GCF_000007865	MAP_RS08490	0		MAP_RS08490	MAP4_RS10810	RC58_RS10790	RE97_RS10800	A0V42_RS08515	CEP84_RS17880	CEG92_RS08725	EC391_RS02895	EC390_RS19825	EGM63_RS21055	EGM64_RS11600	EGM60_RS08490	EGA31_RS11835
1650	13	hypothetical protein	GCF_000007865	MAP_RS08495	0		MAP_RS08495	MAP4_RS10805	RC58_RS10785	RE97_RS10795	A0V42_RS08520	CEP84_RS17875	CEG92_RS08730	EC391_RS02890	EC390_RS19830	EGM63_RS21050	EGM64_RS11605	EGM60_RS08495	EGA31_RS11830
1651	13	FAD-dependent oxidoreductase	GCF_000007865	MAP_RS08500	0		MAP_RS08500	MAP4_RS10800	RC58_RS10780	RE97_RS10790	A0V42_RS08525	CEP84_RS17870	CEG92_RS08735	EC391_RS02885	EC390_RS19835	EGM63_RS21045	EGM64_RS11610	EGM60_RS08500	EGA31_RS11825
1652	13	class I SAM-dependent methyltransferase	GCF_000007865	MAP_RS08505	0		MAP_RS08505	MAP4_RS10795	RC58_RS10775	RE97_RS10785	A0V42_RS08530	CEP84_RS17865	CEG92_RS08740	EC391_RS02880	EC390_RS19840	EGM63_RS21040	EGM64_RS11615	EGM60_RS08505	EGA31_RS11820
1653	13	glycosyltransferase	GCF_000007865	MAP_RS08510	0		MAP_RS08510	MAP4_RS10790	RC58_RS10770	RE97_RS10780	A0V42_RS08535	CEP84_RS17860	CEG92_RS08745	EC391_RS02875	EC390_RS19845	EGM63_RS21035	EGM64_RS11620	EGM60_RS08510	EGA31_RS11815
1654	13	hypothetical protein	GCF_000007865	MAP_RS08520	0		MAP_RS08520	MAP4_RS10780	RC58_RS10760	RE97_RS10770	A0V42_RS08545	CEP84_RS17850	CEG92_RS08755	EC391_RS02865	EC390_RS19855	EGM63_RS21025	EGM64_RS11630	EGM60_RS08520	EGA31_RS11805
1655	13	MOSC domain-containing protein	GCF_000007865	MAP_RS08525	0		MAP_RS08525	MAP4_RS10775	RC58_RS10755	RE97_RS10765	A0V42_RS08550	CEP84_RS17845	CEG92_RS08760	EC391_RS02860	EC390_RS19860	EGM63_RS21020	EGM64_RS11635	EGM60_RS08525	EGA31_RS11800
1656	13	hypothetical protein	GCF_000007865	MAP_RS08530	0		MAP_RS08530	MAP4_RS10770	RC58_RS10750	RE97_RS10760	A0V42_RS08555	CEP84_RS17840	CEG92_RS08765	EC391_RS02855	EC390_RS19865	EGM63_RS21015	EGM64_RS11640	EGM60_RS08530	EGA31_RS11795
1657	13	DUF1345 domain-containing protein	GCF_000007865	MAP_RS08535	0		MAP_RS08535	MAP4_RS10765	RC58_RS10745	RE97_RS10755	A0V42_RS08560	CEP84_RS17835	CEG92_RS08770	EC391_RS02850	EC390_RS19870	EGM63_RS21010	EGM64_RS11645	EGM60_RS08535	EGA31_RS11790
1658	13	cutinase family protein	GCF_000007865	MAP_RS08540	0		MAP_RS08540	MAP4_RS10760	RC58_RS10740	RE97_RS10750	A0V42_RS08565	CEP84_RS17830	CEG92_RS08775	EC391_RS02845	EC390_RS19875	EGM63_RS21005	EGM64_RS11650	EGM60_RS08540	EGA31_RS11785
1659	13	enoyl-CoA hydratase/isomerase family protein	GCF_000007865	MAP_RS08545	0		MAP_RS08545	MAP4_RS10755	RC58_RS10735	RE97_RS10745	A0V42_RS08570	CEP84_RS17825	CEG92_RS08780	EC391_RS02840	EC390_RS19880	EGM63_RS21000	EGM64_RS11655	EGM60_RS08545	EGA31_RS11780
1660	13	hypothetical protein	GCF_000007865	MAP_RS08550	0		MAP_RS08550	MAP4_RS10750	RC58_RS10730	RE97_RS10740	A0V42_RS08575	CEP84_RS17820	CEG92_RS08785	EC391_RS02835	EC390_RS19885	EGM63_RS20995	EGM64_RS11660	EGM60_RS08550	EGA31_RS11775
1661	13	GGDEF domain-containing protein	GCF_000007865	MAP_RS08555	0		MAP_RS08555	MAP4_RS10745	RC58_RS10725	RE97_RS10735	A0V42_RS08580	CEP84_RS17815	CEG92_RS08790	EC391_RS02830	EC390_RS19890	EGM63_RS20990	EGM64_RS11665	EGM60_RS08555	EGA31_RS11770
1662	13	ATP-dependent RNA helicase HrpA	GCF_000007865	MAP_RS08560	0		MAP_RS08560	MAP4_RS10740	RC58_RS10720	RE97_RS10730	A0V42_RS08585	CEP84_RS17810	CEG92_RS08795	EC391_RS02825	EC390_RS19895	EGM63_RS20985	EGM64_RS11670	EGM60_RS08560	EGA31_RS11765
1664	13	hypothetical protein	GCF_000007865	MAP_RS08570	0		MAP_RS08570	MAP4_RS10730	RC58_RS10710	RE97_RS10720	A0V42_RS08595	CEP84_RS17800	CEG92_RS08805	EC391_RS02815	EC390_RS19905	EGM63_RS20975	EGM64_RS11680	EGM60_RS08570	EGA31_RS11755
1665	13	hypothetical protein	GCF_000007865	MAP_RS22335	0		MAP_RS22335	MAP4_RS22320	RC58_RS10705	RE97_RS10715	A0V42_RS08600	CEP84_RS17795	CEG92_RS08810	EC391_RS02810	EC390_RS19910	EGM63_RS20970	EGM64_RS11685	EGM60_RS08575	EGA31_RS11750
1666	13	class I SAM-dependent methyltransferase	GCF_000007865	MAP_RS08580	0		MAP_RS08580	MAP4_RS10720	RC58_RS10695	RE97_RS10705	A0V42_RS08610	CEP84_RS17785	CEG92_RS08820	EC391_RS02800	EC390_RS19920	EGM63_RS20960	EGM64_RS11695	EGM60_RS08585	EGA31_RS11740
1668	13	SAM-dependent methyltransferase	GCF_000007865	MAP_RS08595	0		MAP_RS08595	MAP4_RS10705	RC58_RS10680	RE97_RS10690	A0V42_RS08625	CEP84_RS17770	CEG92_RS08835	EC391_RS02785	EC390_RS19935	EGM63_RS20945	EGM64_RS11710	EGM60_RS08600	EGA31_RS11725
1669	13	hypothetical protein	GCF_000007865	MAP_RS08600	0		MAP_RS08600	MAP4_RS10700	RC58_RS10675	RE97_RS10685	A0V42_RS08630	CEP84_RS17765	CEG92_RS08840	EC391_RS02780	EC390_RS19940	EGM63_RS20940	EGM64_RS11715	EGM60_RS08605	EGA31_RS11720
1670	13	KR domain-containing protein	GCF_000007865	MAP_RS08605	0		MAP_RS08605	MAP4_RS10695	RC58_RS10670	RE97_RS10680	A0V42_RS08635	CEP84_RS17760	CEG92_RS08845	EC391_RS02775	EC390_RS19945	EGM63_RS20935	EGM64_RS11720	EGM60_RS08610	EGA31_RS11715
1671	13	FKBP-type peptidyl-prolyl cis-trans isomerase	GCF_000007865	MAP_RS08610	0		MAP_RS08610	MAP4_RS10690	RC58_RS10665	RE97_RS10675	A0V42_RS08640	CEP84_RS17755	CEG92_RS08850	EC391_RS02770	EC390_RS19950	EGM63_RS20930	EGM64_RS11725	EGM60_RS08615	EGA31_RS11710
1673	13	molecular chaperone DnaJ	GCF_000007865	MAP_RS08620	0		MAP_RS08620	MAP4_RS10680	RC58_RS10655	RE97_RS10665	A0V42_RS08650	CEP84_RS17745	CEG92_RS08860	EC391_RS02760	EC390_RS19960	EGM63_RS20920	EGM64_RS11735	EGM60_RS08625	EGA31_RS11700
1674	13	MerR family DNA-binding transcriptional regulator	GCF_000007865	MAP_RS08630	0		MAP_RS08630	MAP4_RS10670	RC58_RS10645	RE97_RS10655	A0V42_RS08660	CEP84_RS17735	CEG92_RS08870	EC391_RS02750	EC390_RS19970	EGM63_RS20910	EGM64_RS11745	EGM60_RS08635	EGA31_RS11690
1675	13	hypothetical protein	GCF_000007865	MAP_RS08635	0		MAP_RS08635	MAP4_RS10665	RC58_RS10640	RE97_RS10650	A0V42_RS08665	CEP84_RS17730	CEG92_RS08875	EC391_RS02745	EC390_RS19975	EGM63_RS20905	EGM64_RS11750	EGM60_RS08640	EGA31_RS11685
1676	13	tRNA 4-thiouridine(8) synthase ThiI	GCF_000007865	MAP_RS08640	0		MAP_RS08640	MAP4_RS10660	RC58_RS10635	RE97_RS10645	A0V42_RS08670	CEP84_RS17725	CEG92_RS08880	EC391_RS02740	EC390_RS19980	EGM63_RS20900	EGM64_RS11755	EGM60_RS08645	EGA31_RS11680
1677	13	hydrolase	GCF_000007865	MAP_RS08645	0		MAP_RS08645	MAP4_RS10655	RC58_RS10630	RE97_RS10640	A0V42_RS08675	CEP84_RS17720	CEG92_RS08885	EC391_RS02735	EC390_RS19985	EGM63_RS20895	EGM64_RS11760	EGM60_RS08650	EGA31_RS11675
1678	13	biotin carboxylase	GCF_000007865	MAP_RS08650	0		MAP_RS08650	MAP4_RS10650	RC58_RS10625	RE97_RS10635	A0V42_RS08680	CEP84_RS17715	CEG92_RS08890	EC391_RS02730	EC390_RS19990	EGM63_RS20890	EGM64_RS11765	EGM60_RS08655	EGA31_RS11670
1679	13	DUF899 domain-containing protein	GCF_000007865	MAP_RS08655	0		MAP_RS08655	MAP4_RS10645	RC58_RS10620	RE97_RS10630	A0V42_RS08685	CEP84_RS17710	CEG92_RS08895	EC391_RS02725	EC390_RS19995	EGM63_RS20885	EGM64_RS11770	EGM60_RS08660	EGA31_RS11665
1680	13	hypothetical protein	GCF_000007865	MAP_RS08660	0		MAP_RS08660	MAP4_RS10640	RC58_RS10615	RE97_RS10625	A0V42_RS08690	CEP84_RS17705	CEG92_RS08900	EC391_RS02720	EC390_RS20000	EGM63_RS20880	EGM64_RS11775	EGM60_RS08665	EGA31_RS11660
1681	13	DUF732 domain-containing protein	GCF_000007865	MAP_RS08665	0		MAP_RS08665	MAP4_RS10635	RC58_RS10610	RE97_RS10620	A0V42_RS08695	CEP84_RS17700	CEG92_RS08905	EC391_RS02715	EC390_RS20005	EGM63_RS20875	EGM64_RS11780	EGM60_RS08670	EGA31_RS11655
1682	13	glyoxalase	GCF_000007865	MAP_RS08670	0		MAP_RS08670	MAP4_RS10630	RC58_RS10605	RE97_RS10615	A0V42_RS08700	CEP84_RS17695	CEG92_RS08910	EC391_RS02710	EC390_RS20010	EGM63_RS20870	EGM64_RS11785	EGM60_RS08675	EGA31_RS11650
1683	13	hypothetical protein	GCF_000007865	MAP_RS08680	0		MAP_RS08680	MAP4_RS10620	RC58_RS10595	RE97_RS10605	A0V42_RS08710	CEP84_RS17685	CEG92_RS08920	EC391_RS02700	EC390_RS20020	EGM63_RS20860	EGM64_RS11795	EGM60_RS08685	EGA31_RS11640
1684	13	KR domain-containing protein	GCF_000007865	MAP_RS08685	0		MAP_RS08685	MAP4_RS10615	RC58_RS10590	RE97_RS10600	A0V42_RS08715	CEP84_RS17680	CEG92_RS08925	EC391_RS02695	EC390_RS20025	EGM63_RS20855	EGM64_RS11800	EGM60_RS08690	EGA31_RS11635
1685	13	HD domain-containing protein	GCF_000007865	MAP_RS08690	0		MAP_RS08690	MAP4_RS10610	RC58_RS10585	RE97_RS10595	A0V42_RS08720	CEP84_RS17675	CEG92_RS08930	EC391_RS02690	EC390_RS20030	EGM63_RS20850	EGM64_RS11805	EGM60_RS08695	EGA31_RS11630
1686	13	long-chain fatty acid--CoA ligase	GCF_000007865	MAP_RS08695	0		MAP_RS08695	MAP4_RS10605	RC58_RS10580	RE97_RS10590	A0V42_RS08725	CEP84_RS17670	CEG92_RS08935	EC391_RS02685	EC390_RS20035	EGM63_RS20845	EGM64_RS11810	EGM60_RS08700	EGA31_RS11625
1687	13	alpha/beta hydrolase	GCF_000007865	MAP_RS08700	0		MAP_RS08700	MAP4_RS10600	RC58_RS10575	RE97_RS10585	A0V42_RS08730	CEP84_RS17665	CEG92_RS08940	EC391_RS02680	EC390_RS20040	EGM63_RS20840	EGM64_RS11815	EGM60_RS08705	EGA31_RS11620
1688	13	TetR/AcrR family transcriptional regulator	GCF_000007865	MAP_RS08705	0		MAP_RS08705	MAP4_RS10595	RC58_RS10570	RE97_RS10580	A0V42_RS08735	CEP84_RS17660	CEG92_RS08945	EC391_RS02675	EC390_RS20045	EGM63_RS20835	EGM64_RS11820	EGM60_RS08710	EGA31_RS11615
1689	13	acyl-CoA dehydrogenase	GCF_000007865	MAP_RS08715	0		MAP_RS08715	MAP4_RS10585	RC58_RS10560	RE97_RS10570	A0V42_RS08745	CEP84_RS17650	CEG92_RS08955	EC391_RS02665	EC390_RS20055	EGM63_RS20825	EGM64_RS11830	EGM60_RS08720	EGA31_RS11605
1690	13	acetyl-CoA acetyltransferase	GCF_000007865	MAP_RS08720	0		MAP_RS08720	MAP4_RS10580	RC58_RS10555	RE97_RS10565	A0V42_RS08750	CEP84_RS17645	CEG92_RS08960	EC391_RS02660	EC390_RS20060	EGM63_RS20820	EGM64_RS11835	EGM60_RS08725	EGA31_RS11600
1691	13	FadB_2	GCF_000390085	MAP4_RS10575	0		MAP_RS08725	MAP4_RS10575	RC58_RS10550	RE97_RS10560	A0V42_RS08755	CEP84_RS17640	CEG92_RS08965	EC391_RS02655	EC390_RS20065	EGM63_RS20815	EGM64_RS11840	EGM60_RS08730	EGA31_RS11595
1692	13	NAD(P)-dependent oxidoreductase	GCF_000007865	MAP_RS08730	0		MAP_RS08730	MAP4_RS10570	RC58_RS10545	RE97_RS10555	A0V42_RS08760	CEP84_RS17635	CEG92_RS08970	EC391_RS02650	EC390_RS20070	EGM63_RS20810	EGM64_RS11845	EGM60_RS08735	EGA31_RS11590
1693	13	hypothetical protein	GCF_000007865	MAP_RS08735	0		MAP_RS08735	MAP4_RS10565	RC58_RS10540	RE97_RS10550	A0V42_RS08765	CEP84_RS17630	CEG92_RS08975	EC391_RS02645	EC390_RS20075	EGM63_RS20805	EGM64_RS11850	EGM60_RS08740	EGA31_RS11585
1694	13	DUF1942 domain-containing protein	GCF_000007865	MAP_RS08740	0		MAP_RS08740	MAP4_RS10560	RC58_RS10535	RE97_RS10545	A0V42_RS08770	CEP84_RS17625	CEG92_RS08980	EC391_RS02640	EC390_RS20080	EGM63_RS20800	EGM64_RS11855	EGM60_RS08745	EGA31_RS11580
1695	13	TetR/AcrR family transcriptional regulator	GCF_000007865	MAP_RS08745	0		MAP_RS08745	MAP4_RS10555	RC58_RS10530	RE97_RS10540	A0V42_RS08775	CEP84_RS17620	CEG92_RS08985	EC391_RS02635	EC390_RS20085	EGM63_RS20795	EGM64_RS11860	EGM60_RS08750	EGA31_RS11575
1696	13	3-beta hydroxysteroid dehydrogenase	GCF_000007865	MAP_RS08750	0		MAP_RS08750	MAP4_RS10550	RC58_RS10525	RE97_RS10535	A0V42_RS08780	CEP84_RS17615	CEG92_RS08990	EC391_RS02630	EC390_RS20090	EGM63_RS20790	EGM64_RS11865	EGM60_RS08755	EGA31_RS11570
1697	13	hypothetical protein	GCF_000007865	MAP_RS08755	0		MAP_RS08755	MAP4_RS10545	RC58_RS10520	RE97_RS10530	A0V42_RS08785	CEP84_RS17610	CEG92_RS08995	EC391_RS02625	EC390_RS20095	EGM63_RS20785	EGM64_RS11870	EGM60_RS08760	EGA31_RS11565
1698	13	TetR/AcrR family transcriptional regulator	GCF_000007865	MAP_RS08760	0		MAP_RS08760	MAP4_RS10540	RC58_RS10515	RE97_RS10525	A0V42_RS08790	CEP84_RS17600	CEG92_RS09005	EC391_RS02615	EC390_RS20105	EGM63_RS20770	EGM64_RS11885	EGM60_RS08775	EGA31_RS11550
1700	13	NADP oxidoreductase	GCF_000007865	MAP_RS08770	0		MAP_RS08770	MAP4_RS10530	RC58_RS10505	RE97_RS10515	A0V42_RS08800	CEP84_RS17585	CEG92_RS09015	EC391_RS02600	EC390_RS20120	EGM63_RS20755	EGM64_RS11900	EGM60_RS08790	EGA31_RS11435
1701	13	cytochrome b561	GCF_000007865	MAP_RS08775	0		MAP_RS08775	MAP4_RS10525	RC58_RS10500	RE97_RS10510	A0V42_RS08805	CEP84_RS17580	CEG92_RS09020	EC391_RS02595	EC390_RS20125	EGM63_RS20750	EGM64_RS11905	EGM60_RS08795	EGA31_RS11440
1702	13	catalase	GCF_000007865	MAP_RS08780	0		MAP_RS08780	MAP4_RS10520	RC58_RS10495	RE97_RS10505	A0V42_RS08810	CEP84_RS17575	CEG92_RS09025	EC391_RS02590	EC390_RS20130	EGM63_RS20745	EGM64_RS11910	EGM60_RS08800	EGA31_RS11445
1703	13	alpha/beta hydrolase	GCF_000007865	MAP_RS08790	0		MAP_RS08790	MAP4_RS10510	RC58_RS10485	RE97_RS10495	A0V42_RS08820	CEP84_RS17565	CEG92_RS09035	EC391_RS02580	EC390_RS20140	EGM63_RS20735	EGM64_RS11920	EGM60_RS08810	EGA31_RS11455
1721	13	hypothetical protein	GCF_000007865	MAP_RS08885	0		MAP_RS08885	MAP4_RS10415	RC58_RS10390	RE97_RS10400	A0V42_RS08915	CEP84_RS17470	CEG92_RS09130	EC391_RS02480	EC390_RS20240	EGM63_RS20630	EGM64_RS12025	EGM60_RS08915	EGA31_RS11465
1722	13	hypothetical protein	GCF_000007865	MAP_RS08890	0		MAP_RS08890	MAP4_RS10410	RC58_RS10385	RE97_RS10395	A0V42_RS08920	CEP84_RS17465	CEG92_RS09135	EC391_RS02475	EC390_RS20245	EGM63_RS20625	EGM64_RS12030	EGM60_RS08920	EGA31_RS11470
1723	13	acyl-CoA dehydrogenase	GCF_000007865	MAP_RS08895	0		MAP_RS08895	MAP4_RS10405	RC58_RS10380	RE97_RS10390	A0V42_RS08925	CEP84_RS17460	CEG92_RS09140	EC391_RS02470	EC390_RS20250	EGM63_RS20620	EGM64_RS12035	EGM60_RS08925	EGA31_RS11475
1724	13	thioesterase family protein	GCF_000007865	MAP_RS08900	0		MAP_RS08900	MAP4_RS10400	RC58_RS10375	RE97_RS10385	A0V42_RS08930	CEP84_RS17455	CEG92_RS09145	EC391_RS02465	EC390_RS20255	EGM63_RS20615	EGM64_RS12040	EGM60_RS08930	EGA31_RS11480
1725	13	nuclear transport factor 2 family protein	GCF_000007865	MAP_RS08905	0		MAP_RS08905	MAP4_RS10395	RC58_RS10370	RE97_RS10380	A0V42_RS08935	CEP84_RS17450	CEG92_RS09150	EC391_RS02460	EC390_RS20260	EGM63_RS20610	EGM64_RS12045	EGM60_RS08935	EGA31_RS11485
1726	13	aldo/keto reductase	GCF_000007865	MAP_RS08915	0		MAP_RS08915	MAP4_RS10385	RC58_RS10360	RE97_RS10370	A0V42_RS08945	CEP84_RS17440	CEG92_RS09160	EC391_RS02450	EC390_RS20270	EGM63_RS20600	EGM64_RS12055	EGM60_RS08945	EGA31_RS11495
1727	13	acyltransferase	GCF_000007865	MAP_RS08920	0		MAP_RS08920	MAP4_RS10380	RC58_RS10355	RE97_RS10365	A0V42_RS08950	CEP84_RS17435	CEG92_RS09165	EC391_RS02445	EC390_RS20275	EGM63_RS20595	EGM64_RS12060	EGM60_RS08950	EGA31_RS11500
1728	13	universal stress protein	GCF_000007865	MAP_RS08925	0		MAP_RS08925	MAP4_RS10375	RC58_RS10350	RE97_RS10360	A0V42_RS08955	CEP84_RS17430	CEG92_RS09170	EC391_RS02440	EC390_RS20280	EGM63_RS20590	EGM64_RS12065	EGM60_RS08955	EGA31_RS11505
1729	13	formate/nitrite transporter family protein	GCF_000007865	MAP_RS08930	0		MAP_RS08930	MAP4_RS10370	RC58_RS10345	RE97_RS10355	A0V42_RS08960	CEP84_RS17425	CEG92_RS09175	EC391_RS02435	EC390_RS20285	EGM63_RS20585	EGM64_RS12070	EGM60_RS08960	EGA31_RS11510
1730	13	hypothetical protein	GCF_000007865	MAP_RS08935	0		MAP_RS08935	MAP4_RS10365	RC58_RS10340	RE97_RS10350	A0V42_RS08965	CEP84_RS17420	CEG92_RS09180	EC391_RS02430	EC390_RS20290	EGM63_RS20580	EGM64_RS12075	EGM60_RS08965	EGA31_RS11515
1731	13	DNA-directed RNA polymerase sigma-70 factor	GCF_000007865	MAP_RS08940	0		MAP_RS08940	MAP4_RS10360	RC58_RS10335	RE97_RS10345	A0V42_RS08970	CEP84_RS17415	CEG92_RS09185	EC391_RS02425	EC390_RS20295	EGM63_RS20575	EGM64_RS12080	EGM60_RS08970	EGA31_RS11520
1732	13	acyl-CoA dehydrogenase	GCF_000007865	MAP_RS08945	0		MAP_RS08945	MAP4_RS10355	RC58_RS10330	RE97_RS10340	A0V42_RS08975	CEP84_RS17410	CEG92_RS09190	EC391_RS02420	EC390_RS20300	EGM63_RS20570	EGM64_RS12085	EGM60_RS08975	EGA31_RS11525
1733	13	OsmC family peroxiredoxin	GCF_000007865	MAP_RS08950	0		MAP_RS08950	MAP4_RS10350	RC58_RS10325	RE97_RS10335	A0V42_RS08980	CEP84_RS17405	CEG92_RS09195	EC391_RS02415	EC390_RS20305	EGM63_RS20565	EGM64_RS12090	EGM60_RS08980	EGA31_RS11530
1735	13	EfeM/EfeO family lipoprotein	GCF_000007865	MAP_RS08960	0		MAP_RS08960	MAP4_RS10340	RC58_RS10315	RE97_RS10325	A0V42_RS08990	CEP84_RS17395	CEG92_RS09205	EC391_RS02405	EC390_RS20315	EGM63_RS20555	EGM64_RS12100	EGM60_RS08990	EGA31_RS11415
1736	13	Fe2+/Pb2+ permease	GCF_000007865	MAP_RS08965	0		MAP_RS08965	MAP4_RS10335	RC58_RS10310	RE97_RS10320	A0V42_RS08995	CEP84_RS17390	CEG92_RS09210	EC391_RS02400	EC390_RS20320	EGM63_RS20550	EGM64_RS12105	EGM60_RS08995	EGA31_RS11410
1737	13	DUF3097 domain-containing protein	GCF_000007865	MAP_RS08970	0		MAP_RS08970	MAP4_RS10330	RC58_RS10305	RE97_RS10315	A0V42_RS09000	CEP84_RS17385	CEG92_RS09215	EC391_RS02395	EC390_RS20325	EGM63_RS20545	EGM64_RS12110	EGM60_RS09000	EGA31_RS11405
1738	13	DUF3349 domain-containing protein	GCF_000007865	MAP_RS08975	0		MAP_RS08975	MAP4_RS10325	RC58_RS10300	RE97_RS10310	A0V42_RS09005	CEP84_RS17380	CEG92_RS09220	EC391_RS02390	EC390_RS20330	EGM63_RS20540	EGM64_RS12115	EGM60_RS09005	EGA31_RS11400
1739	13	membrane protein	GCF_000007865	MAP_RS08980	0		MAP_RS08980	MAP4_RS10320	RC58_RS10295	RE97_RS10305	A0V42_RS09010	CEP84_RS17375	CEG92_RS09225	EC391_RS02385	EC390_RS20335	EGM63_RS20535	EGM64_RS12120	EGM60_RS09010	EGA31_RS11395
1740	13	sn-glycerol-3-phosphate ABC transporter ATP-binding protein UgpC	GCF_000007865	MAP_RS08985	0		MAP_RS08985	MAP4_RS10315	RC58_RS10290	RE97_RS10300	A0V42_RS09015	CEP84_RS17370	CEG92_RS09230	EC391_RS02380	EC390_RS20340	EGM63_RS20530	EGM64_RS12125	EGM60_RS09015	EGA31_RS11390
1741	13	carbohydrate ABC transporter permease	GCF_000007865	MAP_RS08990	0		MAP_RS08990	MAP4_RS10310	RC58_RS10285	RE97_RS10295	A0V42_RS09020	CEP84_RS17365	CEG92_RS09235	EC391_RS02375	EC390_RS20345	EGM63_RS20525	EGM64_RS12130	EGM60_RS09020	EGA31_RS11385
1742	13	sugar ABC transporter permease	GCF_000007865	MAP_RS08995	0		MAP_RS08995	MAP4_RS10305	RC58_RS10280	RE97_RS10290	A0V42_RS09025	CEP84_RS17360	CEG92_RS09240	EC391_RS02370	EC390_RS20350	EGM63_RS20520	EGM64_RS12135	EGM60_RS09025	EGA31_RS11380
1743	13	sugar ABC transporter substrate-binding protein	GCF_000007865	MAP_RS09000	0		MAP_RS09000	MAP4_RS10300	RC58_RS10275	RE97_RS10285	A0V42_RS09030	CEP84_RS17355	CEG92_RS09245	EC391_RS02365	EC390_RS20355	EGM63_RS20515	EGM64_RS12140	EGM60_RS09030	EGA31_RS11375
1744	13	RNA polymerase subunit sigma	GCF_000007865	MAP_RS09005	0		MAP_RS09005	MAP4_RS10295	RC58_RS10270	RE97_RS10280	A0V42_RS09035	CEP84_RS17350	CEG92_RS09250	EC391_RS02360	EC390_RS20360	EGM63_RS20510	EGM64_RS12145	EGM60_RS09035	EGA31_RS11370
1746	13	hypothetical protein	GCF_000007865	MAP_RS09015	0		MAP_RS09015	MAP4_RS10285	RC58_RS10260	RE97_RS10270	A0V42_RS09045	CEP84_RS17335	CEG92_RS09260	EC391_RS02345	EC390_RS20375	EGM63_RS20495	EGM64_RS12160	EGM60_RS09050	EGA31_RS11355
1747	13	NTF2 domain-containing protein	GCF_000007865	MAP_RS09020	0		MAP_RS09020	MAP4_RS10280	RC58_RS10255	RE97_RS10265	A0V42_RS09050	CEP84_RS17330	CEG92_RS09265	EC391_RS02340	EC390_RS20380	EGM63_RS20490	EGM64_RS12165	EGM60_RS09055	EGA31_RS11350
1748	13	amidase	GCF_000007865	MAP_RS09025	0		MAP_RS09025	MAP4_RS10275	RC58_RS10250	RE97_RS10260	A0V42_RS09055	CEP84_RS17325	CEG92_RS09270	EC391_RS02335	EC390_RS20385	EGM63_RS20485	EGM64_RS12170	EGM60_RS09060	EGA31_RS11345
1749	13	DoxX family membrane protein	GCF_000007865	MAP_RS09030	0		MAP_RS09030	MAP4_RS10270	RC58_RS10245	RE97_RS10255	A0V42_RS09060	CEP84_RS17320	CEG92_RS09275	EC391_RS02330	EC390_RS20390	EGM63_RS20480	EGM64_RS12175	EGM60_RS09065	EGA31_RS11340
1750	13	ATPase	GCF_000007865	MAP_RS09035	0		MAP_RS09035	MAP4_RS10265	RC58_RS10240	RE97_RS10250	A0V42_RS09065	CEP84_RS17315	CEG92_RS09280	EC391_RS02325	EC390_RS20395	EGM63_RS20475	EGM64_RS12180	EGM60_RS09070	EGA31_RS11335
1751	13	hypothetical protein	GCF_000007865	MAP_RS09040	0		MAP_RS09040	MAP4_RS10260	RC58_RS10235	RE97_RS10245	A0V42_RS09070	CEP84_RS17310	CEG92_RS09285	EC391_RS02320	EC390_RS20400	EGM63_RS20470	EGM64_RS12185	EGM60_RS09075	EGA31_RS11330
1752	13	gluconate kinase	GCF_000007865	MAP_RS09045	0		MAP_RS09045	MAP4_RS10255	RC58_RS10230	RE97_RS10240	A0V42_RS09075	CEP84_RS17305	CEG92_RS09290	EC391_RS02315	EC390_RS20405	EGM63_RS20465	EGM64_RS12190	EGM60_RS09080	EGA31_RS11325
1753	13	DUF1679 domain-containing protein	GCF_000007865	MAP_RS09050	0		MAP_RS09050	MAP4_RS10250	RC58_RS10225	RE97_RS10235	A0V42_RS09080	CEP84_RS17300	CEG92_RS09295	EC391_RS02310	EC390_RS20410	EGM63_RS20460	EGM64_RS12195	EGM60_RS09085	EGA31_RS11320
1754	13	carboxylesterase/lipase family protein	GCF_000007865	MAP_RS09055	0		MAP_RS09055	MAP4_RS10245	RC58_RS10220	RE97_RS10230	A0V42_RS09085	CEP84_RS17295	CEG92_RS09300	EC391_RS02305	EC390_RS20415	EGM63_RS20455	EGM64_RS12200	EGM60_RS09090	EGA31_RS11315
1755	13	hypothetical protein	GCF_000007865	MAP_RS09060	0		MAP_RS09060	MAP4_RS10240	RC58_RS10215	RE97_RS10225	A0V42_RS09090	CEP84_RS17290	CEG92_RS09305	EC391_RS02300	EC390_RS20420	EGM63_RS20450	EGM64_RS12205	EGM60_RS09095	EGA31_RS11310
1756	13	cytochrome P450	GCF_000007865	MAP_RS09065	0		MAP_RS09065	MAP4_RS10235	RC58_RS10210	RE97_RS10220	A0V42_RS09095	CEP84_RS17285	CEG92_RS09310	EC391_RS02295	EC390_RS20425	EGM63_RS20445	EGM64_RS12210	EGM60_RS09100	EGA31_RS11305
1757	13	TetR/AcrR family transcriptional regulator	GCF_000007865	MAP_RS09070	0		MAP_RS09070	MAP4_RS10230	RC58_RS10205	RE97_RS10215	A0V42_RS09100	CEP84_RS17280	CEG92_RS09315	EC391_RS02290	EC390_RS20430	EGM63_RS20440	EGM64_RS12215	EGM60_RS09105	EGA31_RS11300
1758	13	hypothetical protein	GCF_000007865	MAP_RS09075	0		MAP_RS09075	MAP4_RS10225	RC58_RS10200	RE97_RS10210	A0V42_RS09105	CEP84_RS17275	CEG92_RS09320	EC391_RS02285	EC390_RS20435	EGM63_RS20435	EGM64_RS12220	EGM60_RS09110	EGA31_RS11295
1760	13	dihydrodipicolinate reductase	GCF_000007865	MAP_RS09085	0		MAP_RS09085	MAP4_RS10215	RC58_RS10190	RE97_RS10200	A0V42_RS09115	CEP84_RS17260	CEG92_RS09330	EC391_RS02270	EC390_RS20450	EGM63_RS20420	EGM64_RS12235	EGM60_RS09125	EGA31_RS11290
1761	13	transcriptional regulator	GCF_000007865	MAP_RS09095	0		MAP_RS09095	MAP4_RS10205	RC58_RS10180	RE97_RS10190	A0V42_RS09125	CEP84_RS17250	CEG92_RS09340	EC391_RS02260	EC390_RS20460	EGM63_RS20410	EGM64_RS12245	EGM60_RS09135	EGA31_RS11280
1762	13	hypothetical protein	GCF_000007865	MAP_RS09100	0		MAP_RS09100	MAP4_RS10200	RC58_RS10175	RE97_RS10185	A0V42_RS09130	CEP84_RS17245	CEG92_RS09345	EC391_RS02255	EC390_RS20465	EGM63_RS20405	EGM64_RS12250	EGM60_RS09140	EGA31_RS11275
1763	13	hypothetical protein	GCF_000007865	MAP_RS09105	0		MAP_RS09105	MAP4_RS10195	RC58_RS10170	RE97_RS10180	A0V42_RS09135	CEP84_RS17240	CEG92_RS09350	EC391_RS02250	EC390_RS20470	EGM63_RS20400	EGM64_RS12255	EGM60_RS09145	EGA31_RS11270
1764	13	CbbQ/NirQ/NorQ/GpvN family protein	GCF_000007865	MAP_RS09110	0		MAP_RS09110	MAP4_RS10190	RC58_RS10165	RE97_RS10175	A0V42_RS09140	CEP84_RS17235	CEG92_RS09355	EC391_RS02245	EC390_RS20475	EGM63_RS20395	EGM64_RS12260	EGM60_RS09150	EGA31_RS11265
1765	13	hypothetical protein	GCF_000007865	MAP_RS09120	0		MAP_RS09120	MAP4_RS10180	RC58_RS10155	RE97_RS10165	A0V42_RS09145	CEP84_RS17230	CEG92_RS09360	EC391_RS02240	EC390_RS20480	EGM63_RS20390	EGM64_RS12265	EGM60_RS09155	EGA31_RS11260
1767	13	hypothetical protein	GCF_000007865	MAP_RS09130	0		MAP_RS09130	MAP4_RS10170	RC58_RS10145	RE97_RS10155	A0V42_RS09155	CEP84_RS17215	CEG92_RS09370	EC391_RS02225	EC390_RS20495	EGM63_RS20375	EGM64_RS12280	EGM60_RS09170	EGA31_RS11245
1768	13	hypothetical protein	GCF_000007865	MAP_RS09135	0		MAP_RS09135	MAP4_RS10165	RC58_RS10140	RE97_RS10150	A0V42_RS09160	CEP84_RS17210	CEG92_RS09375	EC391_RS02220	EC390_RS20500	EGM63_RS20370	EGM64_RS12285	EGM60_RS09175	EGA31_RS11240
1769	13	KR domain-containing protein	GCF_000007865	MAP_RS09140	0	FS,FG-In	MAP_RS09140	MAP4_RS10160	RC58_RS23480	RE97_RS10145	A0V42_RS09165	CEP84_RS17205	CEG92_RS09380	EC391_RS02215	EC390_RS20505	EGM63_RS20365	EGM64_RS12290	EGM60_RS09180	EGA31_RS11235
1770	13	hypothetical protein	GCF_000007865	MAP_RS09145	0		MAP_RS09145	MAP4_RS10155	RC58_RS10120	RE97_RS10130	A0V42_RS09170	CEP84_RS17200	CEG92_RS09385	EC391_RS02210	EC390_RS20510	EGM63_RS20360	EGM64_RS12295	EGM60_RS09185	EGA31_RS11230
1771	13	RNA polymerase-binding protein RbpA	GCF_000007865	MAP_RS09150	0		MAP_RS09150	MAP4_RS10150	RC58_RS10115	RE97_RS10125	A0V42_RS09175	CEP84_RS17195	CEG92_RS09390	EC391_RS02205	EC390_RS20515	EGM63_RS20355	EGM64_RS12300	EGM60_RS09190	EGA31_RS11225
1772	13	polyprenol monophosphomannose synthase	GCF_000007865	MAP_RS09155	0		MAP_RS09155	MAP4_RS10145	RC58_RS10110	RE97_RS10120	A0V42_RS09180	CEP84_RS17190	CEG92_RS09395	EC391_RS02200	EC390_RS20520	EGM63_RS20350	EGM64_RS12305	EGM60_RS09195	EGA31_RS11220
1773	13	apolipoprotein N-acyltransferase	GCF_000007865	MAP_RS09160	0		MAP_RS09160	MAP4_RS10140	RC58_RS10105	RE97_RS10115	A0V42_RS09185	CEP84_RS17185	CEG92_RS09400	EC391_RS02195	EC390_RS20525	EGM63_RS20345	EGM64_RS12310	EGM60_RS09200	EGA31_RS11215
1775	13	membrane protein FxsA	GCF_000007865	MAP_RS09170	0		MAP_RS09170	MAP4_RS10130	RC58_RS10095	RE97_RS10105	A0V42_RS09195	CEP84_RS17175	CEG92_RS09410	EC391_RS02185	EC390_RS20535	EGM63_RS20335	EGM64_RS12320	EGM60_RS09210	EGA31_RS11205
1776	13	dienelactone hydrolase family protein	GCF_000007865	MAP_RS09175	0		MAP_RS09175	MAP4_RS10125	RC58_RS10090	RE97_RS10100	A0V42_RS09200	CEP84_RS17170	CEG92_RS09415	EC391_RS02180	EC390_RS20540	EGM63_RS20330	EGM64_RS12325	EGM60_RS09215	EGA31_RS11200
1777	13	PPOX class F420-dependent oxidoreductase	GCF_000007865	MAP_RS09180	0		MAP_RS09180	MAP4_RS10120	RC58_RS10085	RE97_RS10095	A0V42_RS09205	CEP84_RS17165	CEG92_RS09420	EC391_RS02175	EC390_RS20545	EGM63_RS20325	EGM64_RS12330	EGM60_RS09220	EGA31_RS11195
1778	13	cobaltochelatase subunit CobN	GCF_000007865	MAP_RS09185	0		MAP_RS09185	MAP4_RS10115	RC58_RS10080	RE97_RS10090	A0V42_RS09210	CEP84_RS17160	CEG92_RS09425	EC391_RS02170	EC390_RS20550	EGM63_RS20320	EGM64_RS12335	EGM60_RS09225	EGA31_RS11190
1779	13	alpha/beta hydrolase	GCF_000007865	MAP_RS09190	0		MAP_RS09190	MAP4_RS10110	RC58_RS10075	RE97_RS10085	A0V42_RS09215	CEP84_RS17155	CEG92_RS09430	EC391_RS02165	EC390_RS20555	EGM63_RS20315	EGM64_RS12340	EGM60_RS09230	EGA31_RS11185
1780	13	aliphatic sulfonate ABC transporter substrate-binding protein	GCF_000007865	MAP_RS09195	0		MAP_RS09195	MAP4_RS10105	RC58_RS10070	RE97_RS10080	A0V42_RS09220	CEP84_RS17150	CEG92_RS09435	EC391_RS02160	EC390_RS20560	EGM63_RS20310	EGM64_RS12345	EGM60_RS09235	EGA31_RS11180
1781	13	aliphatic sulfonate ABC transporter ATP-binding protein	GCF_000007865	MAP_RS09200	0		MAP_RS09200	MAP4_RS10100	RC58_RS10065	RE97_RS10075	A0V42_RS09225	CEP84_RS17145	CEG92_RS09440	EC391_RS02155	EC390_RS20565	EGM63_RS20305	EGM64_RS12350	EGM60_RS09240	EGA31_RS11175
1782	13	ABC transporter permease	GCF_000007865	MAP_RS09205	0		MAP_RS09205	MAP4_RS10095	RC58_RS10060	RE97_RS10070	A0V42_RS09230	CEP84_RS17140	CEG92_RS09445	EC391_RS02150	EC390_RS20570	EGM63_RS20300	EGM64_RS12355	EGM60_RS09245	EGA31_RS11170
1783	13	precorrin-3B synthase	GCF_000007865	MAP_RS09210	0		MAP_RS09210	MAP4_RS10090	RC58_RS10055	RE97_RS10065	A0V42_RS09235	CEP84_RS17135	CEG92_RS09450	EC391_RS02145	EC390_RS20575	EGM63_RS20295	EGM64_RS12360	EGM60_RS09250	EGA31_RS11165
1784	13	precorrin-8X methylmutase	GCF_000007865	MAP_RS09215	0		MAP_RS09215	MAP4_RS10085	RC58_RS10050	RE97_RS10060	A0V42_RS09240	CEP84_RS17130	CEG92_RS09455	EC391_RS02140	EC390_RS20580	EGM63_RS20290	EGM64_RS12365	EGM60_RS09255	EGA31_RS11160
1787	13	DUF2275 domain-containing protein	GCF_000007865	MAP_RS09230	0		MAP_RS09230	MAP4_RS10070	RC58_RS10035	RE97_RS10045	A0V42_RS09255	CEP84_RS17115	CEG92_RS09470	EC391_RS02125	EC390_RS20595	EGM63_RS20275	EGM64_RS12380	EGM60_RS09270	EGA31_RS11145
1788	13	cobalt-precorrin-6A reductase	GCF_000007865	MAP_RS09235	0		MAP_RS09235	MAP4_RS10065	RC58_RS10030	RE97_RS10040	A0V42_RS09260	CEP84_RS17110	CEG92_RS09475	EC391_RS02120	EC390_RS20600	EGM63_RS20270	EGM64_RS12385	EGM60_RS09275	EGA31_RS11140
1789	13	precorrin-4 C(11)-methyltransferase	GCF_000007865	MAP_RS09240	0		MAP_RS09240	MAP4_RS10060	RC58_RS10025	RE97_RS10035	A0V42_RS09265	CEP84_RS17105	CEG92_RS09480	EC391_RS02115	EC390_RS20605	EGM63_RS20265	EGM64_RS12390	EGM60_RS09280	EGA31_RS11135
1790	13	bifunctional cobalt-precorrin-7 (C(5))-methyltransferase/cobalt-precorrin-6B (C(15))-methyltransferase	GCF_000007865	MAP_RS09245	0		MAP_RS09245	MAP4_RS10055	RC58_RS10020	RE97_RS10030	A0V42_RS09270	CEP84_RS17100	CEG92_RS09485	EC391_RS02110	EC390_RS20610	EGM63_RS20260	EGM64_RS12395	EGM60_RS09285	EGA31_RS11130
1791	13	F420-dependent biliverdin reductase	GCF_000007865	MAP_RS09255	0		MAP_RS09255	MAP4_RS10045	RC58_RS10010	RE97_RS10020	A0V42_RS09280	CEP84_RS17090	CEG92_RS09495	EC391_RS02100	EC390_RS20620	EGM63_RS20250	EGM64_RS12405	EGM60_RS09295	EGA31_RS11120
1792	13	hypothetical protein	GCF_000007865	MAP_RS22665	0		MAP_RS22665	MAP4_RS22715	RC58_RS22695	RE97_RS22780	A0V42_RS22605	CEP84_RS17085	CEG92_RS09500	EC391_RS02090	EC390_RS20630	EGM63_RS20235	EGM64_RS12420	EGM60_RS09310	EGA31_RS11070
1794	13	aminopeptidase P family protein	GCF_000007865	MAP_RS09265	0		MAP_RS09265	MAP4_RS10035	RC58_RS10000	RE97_RS10010	A0V42_RS09290	CEP84_RS17075	CEG92_RS09510	EC391_RS02080	EC390_RS20640	EGM63_RS20225	EGM64_RS12430	EGM60_RS09320	EGA31_RS11060
1796	13	5'-3' exonuclease	GCF_000007865	MAP_RS09275	0		MAP_RS09275	MAP4_RS10025	RC58_RS09995	RE97_RS10005	A0V42_RS09300	CEP84_RS17065	CEG92_RS09520	EC391_RS02070	EC390_RS20650	EGM63_RS20215	EGM64_RS12440	EGM60_RS09330	EGA31_RS11050
1797	13	DUF4333 domain-containing protein	GCF_000007865	MAP_RS09280	0		MAP_RS09280	MAP4_RS10020	RC58_RS09990	RE97_RS10000	A0V42_RS09305	CEP84_RS17060	CEG92_RS09525	EC391_RS02065	EC390_RS20655	EGM63_RS20210	EGM64_RS12445	EGM60_RS09335	EGA31_RS11045
1798	13	twin-arginine translocase subunit TatC	GCF_000007865	MAP_RS09295	0		MAP_RS09295	MAP4_RS10005	RC58_RS09975	RE97_RS09985	A0V42_RS09320	CEP84_RS17045	CEG92_RS09535	EC391_RS02050	EC390_RS20665	EGM63_RS20195	EGM64_RS12455	EGM60_RS09345	EGA31_RS11030
1799	13	twin-arginine translocase TatA/TatE family subunit	GCF_000007865	MAP_RS09300	0		MAP_RS09300	MAP4_RS10000	RC58_RS09970	RE97_RS09980	A0V42_RS09325	CEP84_RS17040	CEG92_RS09540	EC391_RS02045	EC390_RS20670	EGM63_RS20190	EGM64_RS12460	EGM60_RS09350	EGA31_RS11025
1800	13	YafY family transcriptional regulator	GCF_000007865	MAP_RS09305	0		MAP_RS09305	MAP4_RS09995	RC58_RS09965	RE97_RS09975	A0V42_RS09330	CEP84_RS17035	CEG92_RS09545	EC391_RS02040	EC390_RS20675	EGM63_RS20185	EGM64_RS12465	EGM60_RS09355	EGA31_RS11020
1801	13	YafY family transcriptional regulator	GCF_000007865	MAP_RS09310	0		MAP_RS09310	MAP4_RS09990	RC58_RS09960	RE97_RS09970	A0V42_RS09335	CEP84_RS17030	CEG92_RS09550	EC391_RS02035	EC390_RS20680	EGM63_RS20180	EGM64_RS12470	EGM60_RS09360	EGA31_RS11015
1802	13	proteasome component	GCF_000007865	MAP_RS09315	0		MAP_RS09315	MAP4_RS09985	RC58_RS09955	RE97_RS09965	A0V42_RS09340	CEP84_RS17025	CEG92_RS09555	EC391_RS02030	EC390_RS20685	EGM63_RS20175	EGM64_RS12475	EGM60_RS09365	EGA31_RS11010
1803	13	proteasome subunit alpha	GCF_000007865	MAP_RS09320	0		MAP_RS09320	MAP4_RS09980	RC58_RS09950	RE97_RS09960	A0V42_RS09345	CEP84_RS17020	CEG92_RS09560	EC391_RS02025	EC390_RS20690	EGM63_RS20170	EGM64_RS12480	EGM60_RS09370	EGA31_RS11005
1804	13	proteasome subunit beta	GCF_000007865	MAP_RS09325	0		MAP_RS09325	MAP4_RS09975	RC58_RS09945	RE97_RS09955	A0V42_RS09350	CEP84_RS17015	CEG92_RS09565	EC391_RS02020	EC390_RS20695	EGM63_RS20165	EGM64_RS12485	EGM60_RS09375	EGA31_RS11000
1805	13	prokaryotic ubiquitin-like protein Pup	GCF_000007865	MAP_RS09330	0		MAP_RS09330	MAP4_RS09970	RC58_RS09940	RE97_RS09950	A0V42_RS09355	CEP84_RS17010	CEG92_RS09570	EC391_RS02015	EC390_RS20700	EGM63_RS20160	EGM64_RS12490	EGM60_RS09380	EGA31_RS10995
1806	13	proteasome accessory factor PafA2	GCF_000007865	MAP_RS09335	0		MAP_RS09335	MAP4_RS09965	RC58_RS09935	RE97_RS09945	A0V42_RS09360	CEP84_RS17005	CEG92_RS09575	EC391_RS02010	EC390_RS20705	EGM63_RS20155	EGM64_RS12495	EGM60_RS09385	EGA31_RS10990
1807	13	hypothetical protein	GCF_000007865	MAP_RS09340	0		MAP_RS09340	MAP4_RS09960	RC58_RS09930	RE97_RS09940	A0V42_RS09365	CEP84_RS17000	CEG92_RS09580	EC391_RS02005	EC390_RS20710	EGM63_RS20150	EGM64_RS12500	EGM60_RS09390	EGA31_RS10985
1808	13	proteasome-associated ATPase	GCF_000007865	MAP_RS09345	0		MAP_RS09345	MAP4_RS09955	RC58_RS09925	RE97_RS09935	A0V42_RS09370	CEP84_RS16995	CEG92_RS09585	EC391_RS02000	EC390_RS20715	EGM63_RS20145	EGM64_RS12505	EGM60_RS09395	EGA31_RS10980
1810	13	DUF503 domain-containing protein	GCF_000007865	MAP_RS09355	0		MAP_RS09355	MAP4_RS09945	RC58_RS09915	RE97_RS09925	A0V42_RS09380	CEP84_RS16985	CEG92_RS09595	EC391_RS01990	EC390_RS20725	EGM63_RS20135	EGM64_RS12515	EGM60_RS09405	EGA31_RS10970
1811	13	tRNA (adenine-N1)-methyltransferase	GCF_000007865	MAP_RS09360	0		MAP_RS09360	MAP4_RS09940	RC58_RS09910	RE97_RS09920	A0V42_RS09385	CEP84_RS16980	CEG92_RS09600	EC391_RS01985	EC390_RS20730	EGM63_RS20130	EGM64_RS12520	EGM60_RS09410	EGA31_RS10965
1812	13	RecB family exonuclease	GCF_000007865	MAP_RS09365	0		MAP_RS09365	MAP4_RS09935	RC58_RS09905	RE97_RS09915	A0V42_RS09390	CEP84_RS16975	CEG92_RS09605	EC391_RS01980	EC390_RS20735	EGM63_RS20125	EGM64_RS12525	EGM60_RS09415	EGA31_RS10960
1813	13	mercuric reductase	GCF_000007865	MAP_RS09370	0		MAP_RS09370	MAP4_RS09930	RC58_RS09900	RE97_RS09910	A0V42_RS09395	CEP84_RS16970	CEG92_RS09610	EC391_RS01975	EC390_RS20740	EGM63_RS20120	EGM64_RS12530	EGM60_RS09420	EGA31_RS10955
1814	13	hypothetical protein	GCF_000007865	MAP_RS09375	0		MAP_RS09375	MAP4_RS09925	RC58_RS09895	RE97_RS09905	A0V42_RS09400	CEP84_RS16965	CEG92_RS09615	EC391_RS01970	EC390_RS20745	EGM63_RS20115	EGM64_RS12535	EGM60_RS09425	EGA31_RS10950
1815	13	ATP phosphoribosyltransferase	GCF_000007865	MAP_RS09380	0		MAP_RS09380	MAP4_RS09920	RC58_RS09890	RE97_RS09900	A0V42_RS09405	CEP84_RS16960	CEG92_RS09620	EC391_RS01965	EC390_RS20750	EGM63_RS20110	EGM64_RS12540	EGM60_RS09430	EGA31_RS10945
1816	13	phosphoribosyl-ATP pyrophosphatase	GCF_000007865	MAP_RS09385	0		MAP_RS09385	MAP4_RS09915	RC58_RS09885	RE97_RS09895	A0V42_RS09410	CEP84_RS16955	CEG92_RS09625	EC391_RS01960	EC390_RS20755	EGM63_RS20105	EGM64_RS12545	EGM60_RS09435	EGA31_RS10940
1817	13	TetR family transcriptional regulator	GCF_000007865	MAP_RS09390	0		MAP_RS09390	MAP4_RS09910	RC58_RS09880	RE97_RS09890	A0V42_RS09415	CEP84_RS16950	CEG92_RS09630	EC391_RS01955	EC390_RS20760	EGM63_RS20100	EGM64_RS12550	EGM60_RS09440	EGA31_RS10935
1818	13	ABC transporter permease	GCF_000007865	MAP_RS09395	0		MAP_RS09395	MAP4_RS09905	RC58_RS09875	RE97_RS09885	A0V42_RS09420	CEP84_RS16945	CEG92_RS09635	EC391_RS01950	EC390_RS20765	EGM63_RS20095	EGM64_RS12555	EGM60_RS09445	EGA31_RS10930
1819	13	ABC transporter permease	GCF_000390085	MAP4_RS09900	0		MAP_RS09400	MAP4_RS09900	RC58_RS09870	RE97_RS09880	A0V42_RS09425	CEP84_RS16940	CEG92_RS09640	EC391_RS01945	EC390_RS20770	EGM63_RS20090	EGM64_RS12560	EGM60_RS09450	EGA31_RS10925
1820	13	MCE family protein	GCF_000007865	MAP_RS09405	0		MAP_RS09405	MAP4_RS09895	RC58_RS09865	RE97_RS09875	A0V42_RS09430	CEP84_RS16935	CEG92_RS09645	EC391_RS01940	EC390_RS20775	EGM63_RS20085	EGM64_RS12565	EGM60_RS09455	EGA31_RS10920
1821	13	MCE family protein	GCF_000007865	MAP_RS09410	0		MAP_RS09410	MAP4_RS09890	RC58_RS09860	RE97_RS09870	A0V42_RS09435	CEP84_RS16930	CEG92_RS09650	EC391_RS01935	EC390_RS20780	EGM63_RS20080	EGM64_RS12570	EGM60_RS09460	EGA31_RS10915
1823	13	MCE family protein	GCF_000007865	MAP_RS09420	0		MAP_RS09420	MAP4_RS09880	RC58_RS09850	RE97_RS09860	A0V42_RS09445	CEP84_RS16920	CEG92_RS09660	EC391_RS01925	EC390_RS20790	EGM63_RS20070	EGM64_RS12580	EGM60_RS09470	EGA31_RS10905
1824	13	MCE family protein	GCF_000007865	MAP_RS09425	0		MAP_RS09425	MAP4_RS09875	RC58_RS09845	RE97_RS09855	A0V42_RS09450	CEP84_RS16915	CEG92_RS09665	EC391_RS01920	EC390_RS20795	EGM63_RS20065	EGM64_RS12585	EGM60_RS09475	EGA31_RS10900
1825	13	MCE family protein	GCF_000007865	MAP_RS09430	0		MAP_RS09430	MAP4_RS09870	RC58_RS09840	RE97_RS09850	A0V42_RS09455	CEP84_RS16910	CEG92_RS09670	EC391_RS01915	EC390_RS20800	EGM63_RS20060	EGM64_RS12590	EGM60_RS09480	EGA31_RS10895
1826	13	hypothetical protein	GCF_000007865	MAP_RS09435	0		MAP_RS09435	MAP4_RS09865	RC58_RS09835	RE97_RS09845	A0V42_RS09460	CEP84_RS16905	CEG92_RS09675	EC391_RS01910	EC390_RS20805	EGM63_RS20055	EGM64_RS12595	EGM60_RS09485	EGA31_RS10890
1827	13	DUF3298 domain-containing protein	GCF_000007865	MAP_RS09440	0		MAP_RS09440	MAP4_RS09860	RC58_RS09830	RE97_RS09840	A0V42_RS09465	CEP84_RS16900	CEG92_RS09680	EC391_RS01905	EC390_RS20810	EGM63_RS20050	EGM64_RS12600	EGM60_RS09490	EGA31_RS10885
1828	13	methionine synthase	GCF_000390085	MAP4_RS09855	0		MAP_RS09445	MAP4_RS09855	RC58_RS09825	RE97_RS09835	A0V42_RS09470	CEP84_RS16895	CEG92_RS09685	EC391_RS01900	EC390_RS20815	EGM63_RS20045	EGM64_RS12605	EGM60_RS09495	EGA31_RS10880
1829	13	PAC2 family protein	GCF_000007865	MAP_RS09450	0		MAP_RS09450	MAP4_RS09850	RC58_RS09820	RE97_RS09830	A0V42_RS09475	CEP84_RS16890	CEG92_RS09690	EC391_RS01895	EC390_RS20820	EGM63_RS20040	EGM64_RS12610	EGM60_RS09500	EGA31_RS10875
1830	13	NAD(P)-dependent oxidoreductase	GCF_000007865	MAP_RS09455	0		MAP_RS09455	MAP4_RS09845	RC58_RS09815	RE97_RS09825	A0V42_RS09480	CEP84_RS16885	CEG92_RS09695	EC391_RS01890	EC390_RS20825	EGM63_RS20035	EGM64_RS12615	EGM60_RS09505	EGA31_RS10870
1831	13	siderophore-interacting protein	GCF_000007865	MAP_RS09465	0		MAP_RS09465	MAP4_RS09835	RC58_RS09805	RE97_RS09815	A0V42_RS09490	CEP84_RS16875	CEG92_RS09705	EC391_RS01880	EC390_RS20835	EGM63_RS20025	EGM64_RS12625	EGM60_RS09515	EGA31_RS10860
1832	13	hemophore-related protein	GCF_000007865	MAP_RS09470	0		MAP_RS09470	MAP4_RS09830	RC58_RS09800	RE97_RS09810	A0V42_RS09495	CEP84_RS16870	CEG92_RS09710	EC391_RS01875	EC390_RS20840	EGM63_RS20020	EGM64_RS12630	EGM60_RS09520	EGA31_RS10855
1833	13	cytochrome P450	GCF_000007865	MAP_RS09475	0		MAP_RS09475	MAP4_RS09825	RC58_RS09795	RE97_RS09805	A0V42_RS09500	CEP84_RS16865	CEG92_RS09715	EC391_RS01870	EC390_RS20845	EGM63_RS20015	EGM64_RS12635	EGM60_RS09525	EGA31_RS10850
1834	13	MFS transporter	GCF_000835225	RC58_RS09785	0		MAP_RS09485	MAP4_RS09815	RC58_RS09785	RE97_RS09795	A0V42_RS09510	CEP84_RS16855	CEG92_RS09725	EC391_RS01860	EC390_RS20855	EGM63_RS20005	EGM64_RS12645	EGM60_RS09535	EGA31_RS10840
1835	13	hypothetical protein	GCF_000007865	MAP_RS09490	0		MAP_RS09490	MAP4_RS09810	RC58_RS09780	RE97_RS09790	A0V42_RS09515	CEP84_RS16850	CEG92_RS09730	EC391_RS01855	EC390_RS20860	EGM63_RS20000	EGM64_RS12650	EGM60_RS09540	EGA31_RS10835
1836	13	MbtH family protein	GCF_000007865	MAP_RS09500	0		MAP_RS09500	MAP4_RS09800	RC58_RS09775	RE97_RS09780	A0V42_RS09525	CEP84_RS16840	CEG92_RS09740	EC391_RS01845	EC390_RS20870	EGM63_RS19995	EGM64_RS12655	EGM60_RS09545	EGA31_RS10830
1837	13	thiamine pyrophosphate-binding protein	GCF_000007865	MAP_RS09505	0		MAP_RS09505	MAP4_RS09795	RC58_RS09770	RE97_RS09775	A0V42_RS09530	CEP84_RS16835	CEG92_RS09745	EC391_RS01840	EC390_RS20875	EGM63_RS19990	EGM64_RS12660	EGM60_RS09550	EGA31_RS10825
1838	13	LuxR family transcriptional regulator	GCF_000007865	MAP_RS09510	0		MAP_RS09510	MAP4_RS09790	RC58_RS09765	RE97_RS09770	A0V42_RS09535	CEP84_RS16830	CEG92_RS09750	EC391_RS01835	EC390_RS20880	EGM63_RS19985	EGM64_RS12665	EGM60_RS09555	EGA31_RS10820
1840	13	L-cysteine:1D-myo-inositol 2-amino-2-deoxy-alpha-D-glucopyranoside ligase	GCF_000007865	MAP_RS09520	0		MAP_RS09520	MAP4_RS09780	RC58_RS09755	RE97_RS09760	A0V42_RS09545	CEP84_RS16820	CEG92_RS09760	EC391_RS01825	EC390_RS20890	EGM63_RS19975	EGM64_RS12675	EGM60_RS09565	EGA31_RS10810
1841	13	3'(2'),5'-bisphosphate nucleotidase CysQ	GCF_000007865	MAP_RS09525	0		MAP_RS09525	MAP4_RS09775	RC58_RS09750	RE97_RS09755	A0V42_RS09550	CEP84_RS16815	CEG92_RS09765	EC391_RS01815	EC390_RS20900	EGM63_RS19965	EGM64_RS12685	EGM60_RS09575	EGA31_RS10800
1842	13	phosphatidylinositol kinase	GCF_000007865	MAP_RS09530	0		MAP_RS09530	MAP4_RS09770	RC58_RS09745	RE97_RS09750	A0V42_RS09555	CEP84_RS16810	CEG92_RS09770	EC391_RS01810	EC390_RS20905	EGM63_RS19960	EGM64_RS12690	EGM60_RS09580	EGA31_RS10795
1843	13	DUF3090 domain-containing protein	GCF_000007865	MAP_RS09535	0		MAP_RS09535	MAP4_RS09765	RC58_RS09740	RE97_RS09745	A0V42_RS09560	CEP84_RS16805	CEG92_RS09775	EC391_RS01805	EC390_RS20910	EGM63_RS19955	EGM64_RS12695	EGM60_RS09585	EGA31_RS10790
1844	13	phosphoglycerate mutase	GCF_000007865	MAP_RS09540	0		MAP_RS09540	MAP4_RS09760	RC58_RS09735	RE97_RS09740	A0V42_RS09565	CEP84_RS16800	CEG92_RS09780	EC391_RS01800	EC390_RS20915	EGM63_RS19950	EGM64_RS12700	EGM60_RS09590	EGA31_RS10785
1845	13	hypothetical protein	GCF_000007865	MAP_RS09545	0		MAP_RS09545	MAP4_RS09755	RC58_RS09730	RE97_RS09735	A0V42_RS09570	CEP84_RS16795	CEG92_RS09785	EC391_RS01795	EC390_RS20920	EGM63_RS19945	EGM64_RS12705	EGM60_RS09595	EGA31_RS10780
1847	13	hypothetical protein	GCF_000007865	MAP_RS09555	0		MAP_RS09555	MAP4_RS09745	RC58_RS09720	RE97_RS09725	A0V42_RS09580	CEP84_RS16785	CEG92_RS09795	EC391_RS01785	EC390_RS20930	EGM63_RS19935	EGM64_RS12715	EGM60_RS09605	EGA31_RS10770
1848	13	quinone-dependent dihydroorotate dehydrogenase	GCF_000007865	MAP_RS09560	0		MAP_RS09560	MAP4_RS09740	RC58_RS09715	RE97_RS09720	A0V42_RS09585	CEP84_RS16780	CEG92_RS09800	EC391_RS01780	EC390_RS20935	EGM63_RS19930	EGM64_RS12720	EGM60_RS09610	EGA31_RS10765
1849	13	HNH endonuclease	GCF_000007865	MAP_RS09565	0		MAP_RS09565	MAP4_RS09735	RC58_RS09710	RE97_RS09715	A0V42_RS09590	CEP84_RS16775	CEG92_RS09805	EC391_RS01775	EC390_RS20940	EGM63_RS19925	EGM64_RS12725	EGM60_RS09615	EGA31_RS10760
1850	13	YbhB/YbcL family Raf kinase inhibitor-like protein	GCF_000007865	MAP_RS09570	0		MAP_RS09570	MAP4_RS09730	RC58_RS09705	RE97_RS09710	A0V42_RS09595	CEP84_RS16770	CEG92_RS09810	EC391_RS01770	EC390_RS20945	EGM63_RS19920	EGM64_RS12730	EGM60_RS09620	EGA31_RS10755
1851	13	hypothetical protein	GCF_000007865	MAP_RS09575	0		MAP_RS09575	MAP4_RS09725	RC58_RS09700	RE97_RS09705	A0V42_RS09600	CEP84_RS16765	CEG92_RS09815	EC391_RS01765	EC390_RS20950	EGM63_RS19915	EGM64_RS12735	EGM60_RS09625	EGA31_RS10750
1852	13	crotonobetainyl-CoA--carnitine CoA-transferase	GCF_000007865	MAP_RS09585	0		MAP_RS09585	MAP4_RS09715	RC58_RS09690	RE97_RS09695	A0V42_RS09610	CEP84_RS16755	CEG92_RS09825	EC391_RS01755	EC390_RS20960	EGM63_RS19905	EGM64_RS12745	EGM60_RS09635	EGA31_RS10740
1853	13	phosphoribosyltransferase	GCF_000007865	MAP_RS09590	0		MAP_RS09590	MAP4_RS09710	RC58_RS09685	RE97_RS09690	A0V42_RS09615	CEP84_RS16750	CEG92_RS09830	EC391_RS01750	EC390_RS20965	EGM63_RS19900	EGM64_RS12750	EGM60_RS09640	EGA31_RS10735
1854	13	hypothetical protein	GCF_000007865	MAP_RS09595	0		MAP_RS09595	MAP4_RS09705	RC58_RS09680	RE97_RS09685	A0V42_RS09620	CEP84_RS16745	CEG92_RS09835	EC391_RS01745	EC390_RS20970	EGM63_RS19895	EGM64_RS12755	EGM60_RS09645	EGA31_RS10730
1855	13	DivIVA domain-containing protein	GCF_000007865	MAP_RS09600	0		MAP_RS09600	MAP4_RS09700	RC58_RS09675	RE97_RS09680	A0V42_RS09625	CEP84_RS16740	CEG92_RS09840	EC391_RS01740	EC390_RS20975	EGM63_RS19890	EGM64_RS12760	EGM60_RS09650	EGA31_RS10725
1856	13	YggT family protein	GCF_000007865	MAP_RS09605	0		MAP_RS09605	MAP4_RS09695	RC58_RS09670	RE97_RS09675	A0V42_RS09630	CEP84_RS16735	CEG92_RS09845	EC391_RS01735	EC390_RS20980	EGM63_RS19885	EGM64_RS12765	EGM60_RS09655	EGA31_RS10720
[truncated: 2,141 more rows]
